# Supplementary material for: Coexpression enrichment analysis at the single-cell level reveals convergent defects in neural progenitor cells and their cell-type transitions in neurodevelopmental disorders
Source: HighWire-hosted journal article supplement (doi:10.1101/gr.254987.119), 2020-06-01
Supplement: Supplemental_Table_S1.xlsx [file Supplemental_Table_S1.xlsx]

## Sheet: Supplemental Table S1
Supplemental Table S1. NDD gene sets, cell type sizes, and co-expression fold enrichment scores.
(A) Eight high-confidence NDD gene sets and four control gene sets with genes expressed in at least one of six major cortical cell types.
(B) Cell numbers of six major cortical cell types and their cell stages.
(C) Co-expression fold enrichment scores of all the GO biological process terms in NPCs calculated using Spearman’s correlation and proportionality phi_s.

## Sheet: Supplemental Table S1A
Supplemental Table S1A. Eight high-confidence NDD gene sets and four control gene sets with genes expressed in at least one of six major cortical cell types.
dnLoF-ASD		dnLoF-Epi		dnLoF-ID		dnLoF-DD		dnMis-ASD		dnMis-Epi		dnMis-ID		dnMis-DD		ASD siblings		ExAC controls		Brain-GRF		Synapse
Gene ID	Symbol	Gene ID	Symbol	Gene ID	Symbol	Gene ID	Symbol	Gene ID	Symbol	Gene ID	Symbol	Gene ID	Symbol	Gene ID	Symbol	Gene ID	Symbol	Gene ID	Symbol	Gene ID	Symbol	Gene ID	Symbol
10765	KDM5B	10236	HNRNPR	10492	SYNCRIP	10765	KDM5B	10057	ABCC5	118788	PIK3AP1	10075	HUWE1	10060	ABCC9	10009	ZBTB33	1	A1BG	10013	HDAC6	1000	CDH2
23001	WDFY3	1106	CHD2	10847	SRCAP	10847	SRCAP	10071	MUC12	1282	COL4A1	10087	COL4A3BP	10075	HUWE1	10018	BCL2L11	100	ADA	10014	HDAC5	10006	ABI1
23126	POGZ	11152	WDR45	11011	TLK2	1106	CHD2	10142	AKAP9	1759	DNM1	10396	ATP8A1	10087	COL4A3BP	10148	EBI3	1000	CDH2	10025	MED16	1004	CDH6
23135	KDM6B	171023	ASXL1	1106	CHD2	11152	WDR45	10260	DENND4A	1778	DYNC1H1	1387	CREBBP	10297	APC2	104	ADARB1	10001	MED6	10084	PQBP1	10059	DNM1L
23394	ADNP	23096	IQSEC2	1499	CTNNB1	1213	CLTC	10297	APC2	1917	EEF1A2	1457	CSNK2A1	10395	DLC1	10513	APPBP2	10003	NAALAD2	10114	HIPK3	1008	CDH10
23469	PHF3	26960	NBEA	1654	DDX3X	1387	CREBBP	10765	KDM5B	2194	FASN	1496	CTNNA2	10411	RAPGEF3	10617	STAMBP	100049587	SIGLEC14	10128	LRPPRC	10082	GPC6
283450	HECTD4	29123	ANKRD11	1742	DLG4	1499	CTNNB1	10847	SRCAP	2290	FOXG1	160851	DGKH	10501	SEMA6B	10734	STAG3	10005	ACOT8	10129	FRY	1009	CDH11
287	ANK2	3785	KCNQ2	23126	POGZ	1654	DDX3X	109	ADCY3	23086	EXPH5	1778	DYNC1H1	10594	PRPF8	10765	KDM5B	10006	ABI1	10142	AKAP9	10096	ACTR3
29123	ANKRD11	4204	MECP2	23522	KAT6B	171023	ASXL1	1106	CHD2	2554	GABRA1	1917	EEF1A2	10664	CTCF	10788	IQGAP2	10007	GNPDA1	10150	MBNL2	10097	ACTR2
4204	MECP2	4297	KMT2A	26040	SETBP1	1859	DYRK1A	113146	AHNAK2	2562	GABRB3	2290	FOXG1	10771	ZMYND11	10897	YIF1A	1001	CDH3	10194	TSHZ1	10109	ARPC2
4297	KMT2A	5813	PURA	27245	AHDC1	2033	EP300	116986	AGAP2	2775	GNAO1	23040	MYT1L	10844	TUBGCP2	10973	ASCC3	10010	TANK	1020	CDK5	1012	CDH13
51111	SUV420H1	6323	SCN1A	29123	ANKRD11	22866	CNKSR2	118987	PDZD8	2902	GRIN1	23135	KDM6B	11011	TLK2	11047	ADRM1	100101467	ZSCAN30	10215	OLIG2	10142	AKAP9
55870	ASH1L	6792	CDKL5	340533	KIAA2022	23118	TAB2	120114	FAT3	3785	KCNQ2	23187	PHLDB1	1106	CHD2	11113	CIT	10011	SRA1	1027	CDKN1B	10152	ABI2
57492	ARID1B	6812	STXBP1	4297	KMT2A	23126	POGZ	124997	WDR81	4204	MECP2	23195	MDN1	1107	CHD3	1124	CHN2	100125288	ZGLP1	1028	CDKN1C	10154	PLXNC1
57680	CHD8	7355	SLC35A2	51322	WAC	23314	SATB2	129563	DIS3L2	57582	KCNT1	23389	MED13L	11078	TRIOBP	112479	ERI2	100129543	ZNF730	10456	HAX1	10160	FARP1
58508	KMT2C	8831	SYNGAP1	55023	PHIP	23389	MED13L	1387	CREBBP	5905	RANGAP1	25831	HECTD1	1108	CHD4	131601	TPRA1	100129842	ZNF737	10472	ZBTB18	10163	WASF2
59269	HIVEP3			55209	SETD5	23394	ADNP	154664	ABCA13	6323	SCN1A	27161	AGO2	11122	PTPRT	132864	CPEB2	100130958	SYCE1L	10499	NCOA2	10178	TENM1
6326	SCN2A			57459	GATAD2B	23522	KAT6B	1778	DYNC1H1	6326	SCN2A	2890	GRIA1	11338	U2AF2	134829	CLVS2	100132406	NBPF10	10522	DEAF1	102	ADAM10
64599	GIGYF1			57492	ARID1B	26053	AUTS2	1788	DNMT3A	6334	SCN8A	2902	GRIN1	1387	CREBBP	1453	CSNK1D	100137047	JMJD7	10611	PDLIM5	1020	CDK5
6683	SPAST			6326	SCN2A	27086	FOXP1	196385	DNAH10	63982	ANO3	2903	GRIN2A	1457	CSNK2A1	1456	CSNK1G3	10014	HDAC5	10612	TRIM3	10211	FLOT1
80816	ASXL3			6660	SOX5	27245	AHDC1	1982	EIF4G2	6792	CDKL5	30000	TNPO2	154664	ABCA13	146857	SLFN13	10015	PDCD6IP	10645	CAMKK2	10228	STX6
85358	SHANK3			6942	TCF20	283489	CHAMP1	20	ABCA2	6812	STXBP1	3550	IK	1654	DDX3X	152789	JAKMIP1	10016	PDCD6	10657	KHDRBS1	10243	GPHN
8831	SYNGAP1			773	CACNA1A	284058	KANSL1	200576	PIKFYVE	6872	TAF1	3785	KCNQ2	168544	ZNF467	160335	TMTC2	10019	SH2B3	10664	CTCF	10297	APC2
8864	PER2			79813	EHMT1	29123	ANKRD11	2195	FAT1	773	CACNA1A	3786	KCNQ3	1759	DNM1	1665	DHX15	1002	CDH4	10716	TBR1	10313	RTN3
9969	MED13			80816	ASXL3	3192	HNRNPU	2200	FBN1	79868	ALG13	5295	PIK3R1	1778	DYNC1H1	171392	ZNF675	10020	GNE	10743	RAI1	10327	AKR1A1
				8239	USP9X	340533	KIAA2022	22853	LMTK2	79947	DHDDS	5339	PLEC	1788	DNMT3A	1793	DOCK1	10021	HCN4	10765	KDM5B	10368	CACNG3
				8493	PPM1D	4204	MECP2	2290	FOXG1	8841	HDAC3	547	KIF1A	1859	DYRK1A	1794	DOCK2	10023	FRAT1	10771	ZMYND11	10369	CACNG2
				8831	SYNGAP1	4297	KMT2A	22990	PCNX	894	CCND2	5500	PPP1CB	1917	EEF1A2	1803	DPP4	10024	TROAP	10847	SRCAP	10371	SEMA3A
				9320	TRIP12	4784	NFIX	23001	WDFY3	9568	GABBR2	55023	PHIP	196743	PAOX	203	AK1	10025	MED16	10891	PPARGC1A	10396	ATP8A1
				9968	MED12	51322	WAC	23013	SPEN	9701	PPP6R2	5528	PPP2R5D	2033	EP300	21	ABCA3	10026	PIGK	10919	EHMT2	10397	NDRG1
						55209	SETD5	23020	SNRNP200	9757	KMT2B	56479	KCNQ5	2194	FASN	220074	LRTOMT	100272147	CMC4	10921	RNPS1	10439	OLFM1
						55869	HDAC8	23126	POGZ			57217	TTC7A	2201	FBN2	2201	FBN2	100287932	TIMM23	11016	ATF7	10458	BAIAP2
						55906	ZC4H2	23199	GSE1			57555	NLGN2	22827	PUF60	221037	JMJD1C	100289678	ZNF783	1106	CHD2	10460	TACC3
						57459	GATAD2B	23215	PRRC2C			5813	PURA	22880	MORC2	22858	ICK	100293516	ZNF587B	11069	RAPGEF4	10497	UNC13B
						57492	ARID1B	23303	KIF13B			5879	RAC1	2290	FOXG1	23093	TTLL5	10036	CHAF1A	1107	CHD3	10505	SEMA4F
						58508	KMT2C	23304	UBR2			6326	SCN2A	23053	ZSWIM8	23136	EPB41L3	10038	PARP2	1108	CHD4	10509	SEMA4B
						6326	SCN2A	23332	CLASP1			6334	SCN8A	23067	SETD1B	23137	SMC5	10039	PARP3	11083	DIDO1	10550	ARL6IP5
						64324	NSD1	23345	SYNE1			64901	RANBP17	23091	ZC3H13	23189	KANK1	1004	CDH6	11100	HNRNPUL1	10564	ARFGEF2
						6925	TCF4	23347	SMCHD1			6597	SMARCA4	23096	IQSEC2	23230	VPS13A	10042	HMGXB4	11166	SOX21	10612	TRIM3
						6942	TCF20	2335	FN1			6812	STXBP1	23122	CLASP2	23244	PDS5A	10043	TOM1	11176	BAZ2A	10636	RGS14
						7862	BRPF1	23352	UBR4			6925	TCF4	23303	KIF13B	2335	FN1	10044	SH2D3C	11279	KLF8	10675	CSPG5
						79718	TBL1XR1	23378	RRP8			6934	TCF7L2	23314	SATB2	25813	SAMM50	10046	MAMLD1	114088	TRIM9	10681	GNB5
						7994	KAT6A	23414	ZFPM2			7204	TRIO	23389	MED13L	25936	NSL1	100505381	MMD2	114785	MBD6	107	ADCY1
						80816	ASXL3	23451	SF3B1			7355	SLC35A2	2561	GABRB2	26135	SERBP1	100505621	C11orf72	1161	ERCC8	10718	NRG3
						8243	SMC1A	23511	NUP188			777	CACNA1E	2562	GABRB3	27316	RBMX	100506658	OCLN	116113	FOXP4	1072	CFL1
						8573	CASK	23524	SRRM2			7874	USP7	25836	NIPBL	27342	RABGEF1	10051	SMC4	116115	ZNF526	10755	GIPC1
						8831	SYNGAP1	26005	C2CD3			8260	NAA10	259232	NALCN	2736	GLI2	10056	FARSB	116448	OLIG1	10787	NCKAP1
						9320	TRIP12	26057	ANKRD17			8289	ARID1A	259282	BOD1L1	2803	GOLGA4	10057	ABCC5	121536	AEBP2	10810	WASF3
								26130	GAPVD1			84678	KDM2B	25930	PTPN23	284403	WDR62	10058	ABCB6	1316	KLF6	10814	CPLX2
								2802	GOLGA3			9968	MED12	26137	ZBTB20	285331	CCDC66	10059	DNM1L	1386	ATF2	10815	CPLX1
								285527	FRYL					26153	KIF26A	285527	FRYL	10060	ABCC9	1387	CREBBP	10882	C1QL1
								287	ANK2					26999	CYFIP2	29956	CERS2	10061	ABCF2	1388	ATF6B	10890	RAB10
								2901	GRIK5					27086	FOXP1	3071	NCKAP1L	10062	NR1H3	1390	CREM	10938	EHD1
								2975	GTF3C1					27445	PCLO	3182	HNRNPAB	10066	SCAMP2	1407	CRY1	10971	YWHAQ
								3096	HIVEP1					2770	GNAI1	3376	IARS	10067	SCAMP3	1408	CRY2	11021	RAB35
								3482	IGF2R					2775	GNAO1	348235	SKA2	10069	RWDD2B	142	PARP1	11069	RAPGEF4
								3763	KCNJ6					2778	GNAS	375387	NRROS	10072	DPP3	1432	MAPK14	1108	CHD4
								3912	LAMB1					2802	GOLGA3	3790	KCNS3	10073	SNUPN	1487	CTBP1	11122	PTPRT
								400713	ZNF880					285175	UNC80	4047	LSS	10075	HUWE1	149041	RC3H1	11133	KPTN
								4035	LRP1					286	ANK1	4090	SMAD5	10076	PTPRU	1499	CTNNB1	11151	CORO1A
								463	ZFHX3					288	ANK3	4628	MYH10	10078	TSSC4	1501	CTNND2	11178	LZTS1
								4643	MYO1E					2909	ARHGAP35	4641	MYO1C	10079	ATP9A	150726	FBXO41	11224	RPL35
								4644	MYO5A					3098	HK1	4752	NEK3	1008	CDH10	151126	ZNF385B	112476	PRRT2
								4703	NEB					339761	CYP27C1	4782	NFIC	10081	PDCD7	1523	CUX1	11252	PACSIN2
								4854	NOTCH3					3708	ITPR1	51126	NAA20	10082	GPC6	152485	ZNF827	112755	STX1B
								4926	NUMA1					3745	KCNB1	51268	PIPOX	10084	PQBP1	153527	ZMAT2	1128	CHRM1
								493	ATP2B4					3777	KCNK3	51308	REEP2	10085	EDIL3	154	ADRB2	11311	VPS45
								51111	SUV420H1					3785	KCNQ2	51319	RSRC1	10087	COL4A3BP	158866	ZDHHC15	11331	PHB2
								51366	UBR5					3786	KCNQ3	51367	POP5	100885848	PTGES3L	165215	FAM171B	11336	EXOC3
								51380	CSAD					3899	AFF3	51382	ATP6V1D	10095	ARPC1B	170302	ARX	11346	SYNPO
								51720	UIMC1					3911	LAMA5	51479	ANKFY1	10097	ACTR2	171017	ZNF384	1137	CHRNA4
								5336	PLCG2					4035	LRP1	51642	MRPL48	10098	TSPAN5	171023	ASXL1	1138	CHRNA5
								54790	TET2					4038	LRP4	5218	CDK14	10099	TSPAN3	1745	DLX1	1139	CHRNA7
								55209	SETD5					4089	SMAD4	5294	PIK3CG	1010	CDH12	1746	DLX2	1140	CHRNB1
								5575	PRKAR1B					4204	MECP2	5351	PLOD1	10100	TSPAN2	1749	DLX5	114088	TRIM9
								5578	PRKCA					4208	MEF2C	5431	POLR2B	10101	NUBP2	1750	DLX6	1141	CHRNB2
								5591	PRKDC					4297	KMT2A	54462	CCSER2	10102	TSFM	1786	DNMT1	114569	MAL2
								5649	RELN					4352	MPL	54465	ETAA1	10105	PPIF	1788	DNMT3A	114781	BTBD9
								5728	PTEN					473	RERE	54584	GNB1L	10106	CTDSP2	1789	DNMT3B	114798	SLITRK1
								57448	BIRC6					478	ATP1A3	546	ATRX	10111	RAD50	1822	ATN1	115827	RAB3C
								57539	WDR35					4849	CNOT3	54726	OTUD4	10112	KIF20A	1827	RCAN1	116841	SNAP47
								57634	EP400					4853	NOTCH2	54933	RHBDL2	10113	PREB	1840	DTX1	116986	AGAP2
								57661	PHRF1					50509	COL5A3	5507	PPP1R3C	10114	HIPK3	1855	DVL1	116988	AGAP3
								57683	ZDBF2					5290	PIK3CA	55112	WDR60	10116	FEM1B	1911	PHC1	1173	AP2M1
								57705	WDFY4					53335	BCL11A	55619	DOCK10	1012	CDH13	1958	EGR1	118	ADD1
								58499	ZNF462					53353	LRP1B	55628	ZNF407	10120	ACTR1B	1959	EGR2	1182	CLCN3
								58508	KMT2C					5336	PLCG2	55773	TBC1D23	10121	ACTR1A	1960	EGR3	119	ADD2
								6261	RYR1					5339	PLEC	55781	RIOK2	10125	RASGRP1	196528	ARID2	1191	CLU
								6262	RYR2					5426	POLE	55839	CENPN	10126	DNAL4	1997	ELF1	120	ADD3
								6323	SCN1A					547	KIF1A	55852	TEX2	10127	ZNF263	199745	THAP8	120892	LRRK2
								6326	SCN2A					54764	ZRANB1	55863	TMEM126B	10128	LRPPRC	20	ABCA2	1209	CLPTM1
								64410	KLHL25					54986	ULK4	56254	RNF20	10129	FRY	200576	PIKFYVE	1211	CLTA
								64478	CSMD1					5500	PPP1CB	56894	AGPAT3	10130	PDIA6	2016	EMX1	1212	CLTB
								64895	PAPOLG					55061	SUSD4	56897	WRNIP1	10131	TRAP1	2018	EMX2	1213	CLTC
								6529	SLC6A1					5518	PPP2R1A	57217	TTC7A	10133	OPTN	202559	KHDRBS2	126129	CPT1C
								6597	SMARCA4					5528	PPP2R5D	57396	CLK4	10137	RBM12	2033	EP300	1266	CNN3
								675	BRCA2					55601	DDX60	57410	SCYL1	10139	ARFRP1	204851	HIPK1	1268	CNR1
								6878	TAF6					55636	CHD7	57584	ARHGAP21	10142	AKAP9	205717	KIAA2018	1272	CNTN1
								7204	TRIO					55690	PACS1	57646	USP28	10144	FAM13A	2066	ERBB4	1312	COMT
								7249	TSC2					55818	KDM3A	57647	DHX37	10146	G3BP1	2068	ERCC2	132204	SYNPR
								7407	VARS					55869	HDAC8	57704	GBA2	10147	SUGP2	2071	ERCC3	132864	CPEB2
								79066	METTL16					5587	PRKD1	58490	RPRD1B	10148	EBI3	2074	ERCC6	134957	STXBP5
								79633	FAT4					5592	PRKG1	58497	PRUNE	10153	CEBPZ	2115	ETV1	136	ADORA2B
								79671	NLRX1					5604	MAP2K1	5893	RAD52	10154	PLXNC1	2186	BPTF	139065	SLITRK4
								80230	RUFY1					56896	DPYSL5	5932	RBBP8	10157	AASS	219541	MED19	1398	CRK
								8295	TRRAP					56995	TULP4	60592	SCOC	10159	ATP6AP2	2200	FBN1	1399	CRKL
								83696	TRAPPC9					57451	TENM2	622	BDH1	1016	CDH18	221037	JMJD1C	140	ADORA3
								84033	OBSCN					57453	DSCAML1	6389	SDHA	10160	FARP1	221833	SP8	1404	HAPLN1
								84465	MEGF11					57482	KIAA1211	63894	VIPAS39	10161	LPAR6	2245	FGD1	140679	SLC32A1
								84623	KIRREL3					57520	HECW2	63916	ELMO2	10165	SLC25A13	22809	ATF5	143187	VTI1A
								85445	CNTNAP4					57551	TAOK1	6455	SH3GL1	10166	SLC25A15	22882	ZHX2	1432	MAPK14
								8857	FCGBP					57575	PCDH10	6585	SLIT1	10168	ZNF197	22891	ZNF365	145581	LRFN5
								8912	CACNA1H					57597	BAHCC1	6714	SRC	10169	SERF2	2290	FOXG1	1460	CSNK2B
								9378	NRXN1					57689	LRRC4C	6938	TCF12	10170	DHRS9	22902	RUFY3	1462	VCAN
								9656	MDC1					5781	PTPN11	6940	ZNF354A	10171	RCL1	22906	TRAK1	1463	NCAN
								9772	KIAA0195					5813	PURA	7273	TTN	10174	SORBS3	22931	RAB18	147381	CBLN2
								9857	CEP350					5879	RAC1	7773	ZNF230	10178	TENM1	22954	TRIM32	148281	SYT6
														5976	UPF1	79009	DDX50	10179	RBM7	22976	PAXIP1	1487	CTBP1
														6261	RYR1	79603	CERS4	10180	RBM6	22980	TCF25	1488	CTBP2
														6262	RYR2	79703	C11orf80	10181	RBM5	22982	DIP2C	149111	CNIH3
														63027	SLC22A23	79844	ZDHHC11	10184	LHFPL2	22984	PDCD11	1496	CTNNA2
														6305	SBF1	80014	WWC2	10186	LHFP	22993	HMGXB3	1499	CTNNB1
														6326	SCN2A	80184	CEP290	10188	TNK2	23013	SPEN	150	ADRA2A
														6334	SCN8A	8031	NCOA4	1019	CDK4	23019	CNOT1	1501	CTNND2
														64324	NSD1	81553	FAM49A	10190	TXNDC9	23028	KDM1A	153	ADRB1
														64344	HIF3A	81566	CSRNP2	10194	TSHZ1	23030	KDM4B	154	ADRB2
														64759	TNS3	81618	ITM2C	10195	ALG3	23036	ZNF292	156	ADRBK1
														64793	CEP85	81846	SBF2	10196	PRMT3	23040	MYT1L	157	ADRBK2
														65125	WNK1	8216	LZTR1	10198	MPHOSPH9	23047	PDS5B	1605	DAG1
														6529	SLC6A1	83743	GRWD1	10199	MPHOSPH10	23051	ZHX3	1607	DGKB
														6558	SLC12A2	8412	BCAR3	1020	CDK5	23054	NCOA6	1609	DGKQ
														6595	SMARCA2	8458	TTF2	10200	MPHOSPH6	23077	MYCBP2	1612	DAPK1
														6597	SMARCA4	85477	SCIN	10201	NME6	2308	FOXO1	161357	MDGA2
														6650	CAPN15	8567	MADD	10203	CALCRL	2309	FOXO3	1627	DBN1
														6653	SORL1	8666	EIF3G	10206	TRIM13	23119	HIC2	163	AP2B1
														6654	SOS1	8912	CACNA1H	10207	INADL	23125	CAMTA2	1630	DCC
														6659	SOX4	89795	NAV3	10208	USPL1	23126	POGZ	164	AP1G1
														6664	SOX11	90333	ZNF468	1021	CDK6	23129	PLXND1	167153	PAPD4
														673	BRAF	90957	DHX57	10210	TOPORS	23133	PHF8	1729	DIAPH1
														6792	CDKL5	91607	SLFN11	10211	FLOT1	23152	CIC	1739	DLG1
														6812	STXBP1	9311	ASIC3	10212	DDX39A	2316	FLNA	1740	DLG2
														6857	SYT1	9645	MICAL2	10213	PSMD14	23164	MPRIP	1741	DLG3
														6872	TAF1	9693	RAPGEF2	10215	OLIG2	23186	RCOR1	1742	DLG4
														689	BTF3	9732	DOCK4	10217	CTDSPL	23211	ZC3H4	1756	DMD
														6925	TCF4	9733	SART3	10219	KLRG1	23261	CAMTA1	1759	DNM1
														7204	TRIO	9821	RB1CC1	1022	CDK7	23264	ZC3H7B	1785	DNM2
														7249	TSC2	9852	EPM2AIP1	10221	TRIB1	23300	ATMIN	1793	DOCK1
														7403	KDM6A	9892	SNAP91	10224	ZNF443	23314	SATB2	1808	DPYSL2
														7430	EZR	9894	TELO2	10225	CD96	23316	CUX2	1809	DPYSL3
														773	CACNA1A	9903	KLHL21	10226	PLIN3	2332	FMR1	1815	DRD4
														777	CACNA1E			10227	MFSD10	2334	AFF2	1821	DRP2
														79718	TBL1XR1			10228	STX6	23373	CRTC1	1855	DVL1
														79813	EHMT1			10229	COQ7	23389	MED13L	1857	DVL3
														7994	KAT6A			10231	RCAN2	23394	ADNP	1902	LPAR1
														80204	FBXO11			10233	LRRC23	23408	SIRT5	1917	EEF1A2
														8085	KMT2D			10234	LRRC17	23411	SIRT1	192683	SCAMP5
														816	CAMK2B			10235	RASGRP2	23413	NCS1	1936	EEF1D
														81624	DIAPH3			10237	SLC35B1	23416	KCNH3	1938	EEF2
														8260	NAA10			10240	MRPS31	23429	RYBP	1946	EFNA5
														8295	TRRAP			10241	CALCOCO2	23435	TARDBP	1947	EFNB1
														84033	OBSCN			10242	KCNMB2	23466	CBX6	1948	EFNB2
														8573	CASK			10243	GPHN	23476	BRD4	1949	EFNB3
														8621	CDK13			10244	RABEPK	23499	MACF1	1965	EIF2S1
														8660	IRS2			10247	HRSP12	23503	ZFYVE26	1975	EIF4B
														867	CBL			1025	CDK9	23512	SUZ12	1977	EIF4E
														8766	RAB11A			10250	SRRM1	23522	KAT6B	1978	EIF4EBP1
														8912	CACNA1H			10252	SPRY1	2353	FOS	1979	EIF4EBP2
														9126	SMC3			10254	STAM2	23654	PLXNB2	1981	EIF4G1
														9343	EFTUD2			10256	CNKSR1	23774	BRD1	1982	EIF4G2
														9448	MAP4K4			10257	ABCC4	2521	FUS	1984	EIF5A
														9531	BAG3			1026	CDKN1A	25793	FBXO7	1993	ELAVL2
														9568	GABBR2			10260	DENND4A	25925	ZNF521	1994	ELAVL1
														9620	CELSR1			10261	IGSF6	26038	CHD5	1996	ELAVL4
														9658	ZNF516			10262	SF3B4	26039	SS18L1	200933	FBXO45
														9659	PDE4DIP			10263	CDK2AP2	26040	SETBP1	2011	MARK2
														9743	ARHGAP32			10266	RAMP2	26122	EPC2	2017	CTTN
														9757	KMT2B			10267	RAMP1	26137	ZBTB20	2030	SLC29A1
														9968	MED12			10268	RAMP3	26468	LHX6	203068	TUBB
																		10269	ZMPSTE24	26508	HEYL	2042	EPHA3
																		10270	AKAP8	26574	AATF	2043	EPHA4
																		10272	FSTL3	26610	ELP4	2045	EPHA7
																		10274	STAG1	26747	NUFIP1	2047	EPHB1
																		10276	NET1	27044	SND1	2048	EPHB2
																		10277	UBE4B	27086	FOXP1	2054	STX2
																		10278	EFS	27125	AFF4	2059	EPS8
																		10280	SIGMAR1	27245	AHDC1	2060	EPS15
																		10282	BET1	2736	GLI2	2064	ERBB2
																		10283	CWC27	2737	GLI3	2066	ERBB4
																		10284	SAP18	274	BIN1	2185	PTK2B
																		10285	SMNDC1	283149	BCL9L	220988	HNRNPA3
																		10286	BCAS2	28996	HIPK2	2239	GPC4
																		10288	LILRB2	29072	SETD2	2280	FKBP1A
																		1029	CDKN2A	2908	NR3C1	22839	DLGAP4
																		10290	SPEG	2969	GTF2I	22848	AAK1
																		10291	SF3A1	2975	GTF3C1	22849	CPEB3
																		10293	TRAIP	2976	GTF3C2	22854	NTNG1
																		10294	DNAJA2	3054	HCFC1	22865	SLITRK3
																		10295	BCKDK	3064	HTT	22866	CNKSR2
																		10296	MAEA	3065	HDAC1	22871	NLGN1
																		10297	APC2	3066	HDAC2	22883	CLSTN1
																		10298	PAK4	30820	KCNIP1	22885	ABLIM3
																		10299	MARCH6	3084	NRG1	22895	RPH3A
																		103	ADAR	3087	HHEX	22908	SACM1L
																		10300	KATNB1	3093	UBE2K	22931	RAB18
																		10302	SNAPC5	3096	HIVEP1	22933	SIRT2
																		10307	APBB3	3097	HIVEP2	22941	SHANK2
																		10308	ZNF267	3131	HLF	22986	SORCS3
																		10311	DSCR3	3149	HMGB3	22999	RIMS1
																		10312	TCIRG1	3150	HMGN1	230	ALDOC
																		10313	RTN3	322	APBB1	23011	RAB21
																		10314	LANCL1	323	APBB2	23025	UNC13A
																		10316	NMUR1	324	APC	23043	TNIK
																		10318	TNIP1	349075	ZNF713	23085	ERC1
																		1032	CDKN2D	351	APP	23096	IQSEC2
																		10322	SMYD5	3516	RBPJ	23129	PLXND1
																		10325	RRAGB	3603	IL16	23157	SEPT6
																		10327	AKR1A1	3607	FOXK2	2316	FLNA
																		10328	EMC8	3720	JARID2	23176	SEPT8
																		10329	TMEM5	3757	KCNH2	2319	FLOT2
																		1033	CDKN3	387893	SETD8	23191	CYFIP1
																		10330	CNPY2	3899	AFF3	23208	SYT11
																		10333	TLR6	4010	LMX1B	23229	ARHGEF9
																		10335	MRVI1	406	ARNTL	23236	PLCB1
																		10342	TFG	408	ARRB1	23237	ARC
																		10346	TRIM22	4086	SMAD1	23285	KIAA1107
																		10347	ABCA7	4150	MAZ	23312	DMXL2
																		10352	WARS2	4152	MBD1	2332	FMR1
																		1036	CDO1	4154	MBNL1	23345	SYNE1
																		10361	NPM2	4204	MECP2	23369	PUM2
																		10362	HMG20B	4205	MEF2A	23373	CRTC1
																		10363	HMG20A	4208	MEF2C	23385	NCSTN
																		10367	MICU1	4209	MEF2D	23396	PIP5K1C
																		10371	SEMA3A	4210	MEFV	23405	DICER1
																		10376	TUBA1B	4212	MEIS2	23413	NCS1
																		10379	IRF9	4281	MID1	23426	GRIP1
																		1038	CDR1	4286	MITF	23467	NPTXR
																		10380	BPNT1	4287	ATXN3	23504	RIMBP2
																		10382	TUBB4A	429	ASCL1	23513	SCRIB
																		10384	BTN3A3	4297	KMT2A	23521	RPL13A
																		10385	BTN2A2	4300	MLLT3	23557	SNAPIN
																		10388	SYCP2	4306	NR3C2	23621	BACE1
																		1039	CDR2	4335	MNT	23673	STX12
																		10390	CEPT1	440097	DBX2	23705	CADM1
																		10391	CORO2B	4520	MTF1	23767	FLRT3
																		103910	MYL12B	4613	MYCN	2475	MTOR
																		10392	NOD1	4665	NAB2	25	ABL1
																		10393	ANAPC10	4674	NAP1L2	252983	STXBP4
																		10395	DLC1	468	ATF4	2534	FYN
																		10396	ATP8A1	4692	NDN	254263	CNIH2
																		10397	NDRG1	472	ATM	2550	GABBR1
																		104	ADARB1	473	RERE	2554	GABRA1
																		1040	CDS1	4760	NEUROD1	2555	GABRA2
																		10400	PEMT	4761	NEUROD2	2557	GABRA4
																		10401	PIAS3	4762	NEUROG1	2558	GABRA5
																		10402	ST3GAL6	4774	NFIA	2560	GABRB1
																		10403	NDC80	4775	NFATC3	2561	GABRB2
																		10404	CPQ	4776	NFATC4	2562	GABRB3
																		10410	IFITM3	4781	NFIB	2566	GABRG2
																		10411	RAPGEF3	4782	NFIC	2571	GAD1
																		10412	NSA2	4784	NFIX	2572	GAD2
																		10417	SPON2	4790	NFKB1	25791	NGEF
																		10419	PRMT5	4821	NKX2-2	25837	RAB26
																		10421	CD2BP2	4839	NOP2	25873	RPL36
																		10423	CDIPT	4855	NOTCH4	25897	RNF19A
																		10424	PGRMC2	4862	NPAS2	25921	ZDHHC5
																		10425	ARIH2	4929	NR4A2	25945	PVRL3
																		10426	TUBGCP3	49855	SCAPER	25953	PNKD
																		10427	SEC24B	5013	OTX1	2596	GAP43
																		10428	CFDP1	50488	MINK1	2597	GAPDH
																		10430	TMEM147	5080	PAX6	25978	CHMP2B
																		10434	LYPLA1	5087	PBX1	25983	NGDN
																		10435	CDC42EP2	51079	NDUFA13	26011	TENM4
																		10436	EMG1	5111	PCNA	26012	NSMF
																		10437	IFI30	51111	SUV420H1	26037	SIPA1L1
																		10439	OLFM1	51114	ZDHHC9	260425	MAGI3
																		10440	TIMM17A	51132	RLIM	26045	LRRTM2
																		10443	N4BP2L2	5119	CHMP1A	26052	DNM3
																		10444	ZER1	51230	PHF20	26059	ERC2
																		10445	MCRS1	51574	LARP7	26115	TANC2
																		10446	LRRN2	51586	MED15	26232	FBXO2
																		10447	FAM3C	51592	TRIM33	26276	VPS33B
																		10449	ACAA2	51621	KLF13	26286	ARFGAP3
																		10454	TAB1	51663	ZFR	2665	GDI2
																		10455	ECI2	51729	WBP11	266727	MDGA1
																		10456	HAX1	51741	WWOX	26747	NUFIP1
																		10457	GPNMB	5178	PEG3	26750	RPS6KC1
																		10458	BAIAP2	51780	KDM3B	26960	NBEA
																		10459	MAD2L2	5187	PER1	26986	PABPC1
																		10460	TACC3	5195	PEX14	26999	CYFIP2
																		10461	MERTK	5253	PHF2	27	ABL2
																		10463	SLC30A9	53335	BCL11A	27020	NPTN
																		10464	PIBF1	5361	PLXNA1	27065	NSG1
																		10465	PPIH	53615	MBD3	27067	STAU2
																		10466	COG5	5362	PLXNA2	27092	CACNG4
																		10467	ZNHIT1	5364	PLXNB1	27253	PCDH17
																		10469	TIMM44	5365	PLXNB3	273	AMPH
																		1047	CLGN	5396	PRRX1	27316	RBMX
																		10474	TADA3	5430	POLR2A	27345	KCNMB4
																		10475	TRIM38	54439	RBM27	274	BIN1
																		10476	ATP5H	5453	POU3F1	2742	GLRA2
																		10478	SLC25A17	5454	POU3F2	2743	GLRB
																		10479	SLC9A6	54542	RC3H2	27445	PCLO
																		10480	EIF3M	5455	POU3F3	2817	GPC1
																		10482	NXF1	546	ATRX	2823	GPM6A
																		10483	SEC23B	54620	FBXL19	2852	GPER1
																		10484	SEC23A	5467	PPARD	2890	GRIA1
																		10485	C1orf61	54815	GATAD2A	2891	GRIA2
																		10486	CAP2	54840	APTX	2892	GRIA3
																		10487	CAP1	54856	GON4L	2893	GRIA4
																		10488	CREB3	54862	CC2D1A	2894	GRID1
																		10490	VTI1B	54880	BCOR	2895	GRID2
																		10491	CRTAP	54904	WHSC1L1	2896	GRN
																		10493	VAT1	54993	ZSCAN2	28964	GIT1
																		10494	STK25	55079	FEZF2	2897	GRIK1
																		10495	ENOX2	55095	SAMD4B	2898	GRIK2
																		10497	UNC13B	5518	PPP2R1A	28988	DBNL
																		105	ADARB2	55193	PBRM1	2899	GRIK3
																		10500	SEMA6C	55502	HES6	29	ABR
																		10501	SEMA6B	55553	SOX6	2900	GRIK4
																		10505	SEMA4F	55558	PLXNA3	2901	GRIK5
																		10507	SEMA4D	55621	TRMT1	2902	GRIN1
																		10509	SEMA4B	55628	ZNF407	2903	GRIN2A
																		1051	CEBPB	55634	KRBOX4	2908	NR3C1
																		10512	SEMA3C	55636	CHD7	29102	DROSHA
																		10518	CIB2	55689	YEATS2	2911	GRM1
																		10519	CIB1	55703	POLR3B	2913	GRM3
																		10520	ZNF211	55729	ATF7IP	2917	GRM7
																		10522	DEAF1	55777	MBD5	2932	GSK3B
																		10525	HYOU1	55832	CAND1	2982	GUCY1A3
																		10526	IPO8	5585	PKN1	2983	GUCY1B3
																		10528	NOP56	55859	BEX1	29904	EEF2K
																		10529	NEBL	55869	HDAC8	29924	EPN1
																		10531	PITRM1	55870	ASH1L	301	ANXA1
																		10533	ATG7	55893	ZNF395	3064	HTT
																		10534	SSSCA1	55914	ERBB2IP	308	ANXA5
																		10535	RNASEH2A	5594	MAPK1	3084	NRG1
																		10539	GLRX3	56160	NDNL2	3092	HIP1
																		1054	CEBPG	56938	ARNTL2	3181	HNRNPA2B1
																		10542	LAMTOR5	56946	C11orf30	3182	HNRNPAB
																		10544	PROCR	56995	TULP4	3184	HNRNPD
																		10548	TM9SF1	57169	ZNFX1	3187	HNRNPH1
																		10549	PRDX4	57178	ZMIZ1	3190	HNRNPK
																		10550	ARL6IP5	57215	THAP11	3192	HNRNPU
																		10552	ARPC1A	5727	PTCH1	320	APBA1
																		10553	HTATIP2	5728	PTEN	3208	HPCA
																		10555	AGPAT2	57282	SLC4A10	321	APBA2
																		10556	RPP30	57459	GATAD2B	322	APBB1
																		10557	RPP38	57479	PRR12	3265	HRAS
																		10558	SPTLC1	57492	ARID1B	3312	HSPA8
																		10559	SLC35A1	57496	MKL2	3337	DNAJB1
																		10560	SLC19A2	57580	PREX1	3356	HTR2A
																		10561	IFI44	57634	EP400	3371	TNC
																		10564	ARFGEF2	57649	PHF12	339451	KLHL17
																		10565	ARFGEF1	57661	PHRF1	347730	LRRTM1
																		10567	RABAC1	57680	CHD8	347731	LRRTM3
																		10569	SLU7	57794	SUGP1	347733	TUBB2B
																		10570	DPYSL4	5813	PURA	3479	IGF1
																		10572	SIVA1	58158	NEUROD4	348	APOE
																		10573	MRPL28	58499	ZNF462	3480	IGF1R
																		10574	CCT7	58506	SCAF1	351	APP
																		10575	CCT4	58508	KMT2C	3556	IL1RAP
																		10577	NPC2	5885	RAD21	3673	ITGA2
																		10579	TACC2	5915	RARB	3675	ITGA3
																		1058	CENPA	59269	HIVEP3	3678	ITGA5
																		10580	SORBS1	5932	RBBP8	3688	ITGB1
																		10581	IFITM2	596	BCL2	3693	ITGB5
																		10585	POMT1	5978	REST	3706	ITPKA
																		10587	TXNRD2	5981	RFC1	3708	ITPR1
																		10590	SCGN	5992	RFX4	3717	JAK2
																		10591	DNPH1	6000	RGS7	3737	KCNA2
																		10592	SMC2	6046	BRD2	3738	KCNA3
																		10594	PRPF8	6095	RORA	3745	KCNB1
																		10598	AHSA1	6096	RORB	3746	KCNC1
																		1060	CENPC	619279	ZNF704	3747	KCNC2
																		10600	USP16	6256	RXRA	3749	KCNC4
																		10603	SH2B2	6297	SALL2	375	ARF1
																		10605	PAIP1	6299	SALL1	3751	KCND2
																		10606	PAICS	6304	SATB1	375323	LHFPL4
																		10607	TBL3	6310	ATXN1	375790	AGRN
																		10611	PDLIM5	6311	ATXN2	3760	KCNJ3
																		10612	TRIM3	6314	ATXN7	3763	KCNJ6
																		10613	ERLIN1	63925	ZNF335	3764	KCNJ8
																		10615	SPAG5	63973	NEUROG2	3767	KCNJ11
																		10616	RBCK1	63974	NEUROD6	3778	KCNMA1
																		10617	STAMBP	64067	NPAS3	378	ARF4
																		10618	TGOLN2	641339	ZNF674	3781	KCNN2
																		1062	CENPE	64324	NSD1	3798	KIF5A
																		10620	ARID3B	64397	ZNF106	382	ARF6
																		10621	POLR3F	64750	SMURF2	3836	KPNA1
																		10622	POLR3G	64919	BCL11B	3838	KPNA2
																		10623	POLR3C	6497	SKI	387	RHOA
																		10625	IVNS1ABP	6594	SMARCA1	388336	SHISA6
																		10626	TRIM16	6595	SMARCA2	388662	SLC6A17
																		10627	MYL12A	6597	SMARCA4	3897	L1CAM
																		10628	TXNIP	6598	SMARCB1	3908	LAMA2
																		10629	TAF6L	6599	SMARCC1	3910	LAMA4
																		1063	CENPF	6601	SMARCC2	3911	LAMA5
																		10630	PDPN	6648	SOD2	3913	LAMB2
																		10632	ATP5L	6656	SOX1	3915	LAMC1
																		10634	GAS2L1	6657	SOX2	3916	LAMP1
																		10635	RAD51AP1	6658	SOX3	3921	RPSA
																		10636	RGS14	6659	SOX4	396	ARHGDIA
																		10640	EXOC5	6660	SOX5	401190	RGS7BP
																		10641	NPRL2	6662	SOX9	4067	LYN
																		10642	IGF2BP1	6663	SOX10	4076	CAPRIN1
																		10644	IGF2BP2	6664	SOX11	4082	MARCKS
																		10645	CAMKK2	6667	SP1	409	ARRB2
																		10650	SLMO1	6671	SP4	4204	MECP2
																		10651	MTX2	6720	SREBF1	4218	RAB8A
																		10652	YKT6	6721	SREBF2	43	ACHE
																		10653	SPINT2	675	BRCA2	4306	NR3C2
																		10654	PMVK	6778	STAT6	4355	MPP2
																		10656	KHDRBS3	6830	SUPT6H	440073	IQSEC3
																		10664	CTCF	6872	TAF1	440279	UNC13C
																		10665	C6orf10	6873	TAF2	4628	MYH10
																		10667	FARS2	6877	TAF5	4644	MYO5A
																		10668	CGRRF1	6907	TBL1X	4645	MYO5B
																		10670	RRAGA	6908	TBP	4646	MYO6
																		10671	DCTN6	6925	TCF4	4649	MYO9A
																		10672	GNA13	6934	TCF7L2	4670	HNRNPM
																		10678	B3GNT2	6942	TCF20	4684	NCAM1
																		10681	GNB5	7008	TEF	4736	RPL10A
																		10683	DLL3	7019	TFAM	4741	NEFM
																		10687	PNMA2	7024	TFCP2	4744	NEFH
																		1069	CETN2	7025	NR2F1	4747	NEFL
																		10690	FUT9	7026	NR2F2	4763	NF1
																		10694	CCT8	7046	TGFBR1	478	ATP1A3
																		10695	CNPY3	7050	TGIF1	4852	NPY
																		107	ADCY1	7067	THRA	4884	NPTX1
																		1070	CETN3	7068	THRB	4885	NPTX2
																		10712	FAM189B	7088	TLE1	4886	NPY1R
																		10713	USP39	7090	TLE3	4897	NRCAM
																		10714	POLD3	7101	NR2E1	490	ATP2B1
																		10715	CERS1	7124	TNF	4900	NRGN
																		10717	AP4B1	7155	TOP2B	4905	NSF
																		10718	NRG3	7157	TP53	491	ATP2B2
																		10721	POLQ	7227	TRPS1	4915	NTRK2
																		10723	SLC12A7	7247	TSN	4916	NTRK3
																		10724	MGEA5	7249	TSC2	493	ATP2B4
																		10725	NFAT5	7270	TTF1	4983	OPHN1
																		10726	NUDC	7329	UBE2I	4986	OPRK1
																		10728	PTGES3	7332	UBE2L3	4988	OPRM1
																		1073	CFL2	7337	UBE3A	5027	P2RX7
																		10730	YME1L1	7428	VHL	5028	P2RY1
																		10732	TCFL5	7468	WHSC1	5048	PAFAH1B1
																		10733	PLK4	7469	NELFA	5058	PAK1
																		10734	STAG3	7494	XBP1	5062	PAK2
																		10741	RBBP9	7507	XPA	5063	PAK3
																		10742	RAI2	7508	XPC	50632	CALY
																		10743	RAI1	7517	XRCC3	5071	PARK2
																		10745	PHTF1	7528	YY1	5073	PARN
																		10747	MASP2	7533	YWHAH	5094	PCBP2
																		10749	KIF1C	7545	ZIC1	50944	SHANK1
																		1075	CTSC	7546	ZIC2	5100	PCDH8
																		10752	CHL1	7547	ZIC3	51104	ABHD17B
																		10755	GIPC1	7552	ZNF711	51107	APH1A
																		10758	TRAF3IP2	7555	CNBP	51225	ABI3
																		10762	NUP50	7566	ZNF18	51299	NRN1
																		10763	NES	7592	ZNF41	51339	DACT1
																		10765	KDM5B	7625	ZNF74	51382	ATP6V1D
																		10767	HBS1L	7704	ZBTB16	5141	PDE4A
																		10769	PLK2	7732	RNF112	51552	RAB14
																		10773	ZBTB6	79595	SAP130	51560	RAB6B
																		10775	POP4	79718	TBL1XR1	51606	ATP6V1H
																		10776	ARPP19	79753	SNIP1	51762	RAB8B
																		10777	ARPP21	79776	ZFHX4	5179	PENK
																		10780	ZNF234	79797	ZNF408	5216	PFN1
																		10781	ZNF266	79813	EHMT1	5217	PFN2
																		10782	ZNF274	79882	ZC3H14	5245	PHB
																		10783	NEK6	79913	ACTR5	526	ATP6V1B2
																		10785	WDR4	8013	NR4A3	527	ATP6V0C
																		10788	IQGAP2	80152	CENPT	528	ATP6V1C1
																		10791	VAMP5	80155	NAA15	529	ATP6V1E1
																		10793	ZNF273	80243	PREX2	5300	PIN1
																		10795	ZNF268	80714	PBX4	5327	PLAT
																		10797	MTHFD2	8085	KMT2D	5331	PLCB3
																		10799	RPP40	8087	FXR1	5332	PLCB4
																		108	ADCY2	8125	ANP32A	53335	BCL11A
																		10800	CYSLTR1	81603	TRIM8	5335	PLCG1
																		10801	SEPT9	8161	COIL	5337	PLD1
																		10802	SEC24A	81887	LAS1L	534	ATP6V1G2
																		10806	SDCCAG8	8204	NRIP1	535	ATP6V0A1
																		10807	SDCCAG3	8216	LZTR1	5358	PLS3
																		10808	HSPH1	8241	RBM10	53616	ADAM22
																		10809	STARD10	8242	KDM5C	537	ATP6AP1
																		1081	CGA	8289	ARID1A	53826	FXYD6
																		10811	NOXA1	8295	TRRAP	53981	CPSF2
																		10817	FRS3	8301	PICALM	54413	NLGN3
																		10818	FRS2	8320	EOMES	54476	RNF216
																		10826	FAXDC2	83637	ZMIZ2	54477	PLEKHA5
																		10827	FAM114A2	83746	L3MBTL2	54487	DGCR8
																		10838	ZNF275	83852	SETDB2	54583	EGLN1
																		10840	ALDH1L1	83988	NCALD	5499	PPP1CA
																		10842	PPP1R17	84108	PCGF6	5501	PPP1CC
																		10844	TUBGCP2	84148	KAT8	5515	PPP2CA
																		10845	CLPX	84159	ARID5B	5518	PPP2R1A
																		10846	PDE10A	84163	GTF2IRD2	5519	PPP2R1B
																		10847	SRCAP	84181	CHD6	5520	PPP2R2A
																		10849	CD3EAP	84282	RNF135	55207	ARL8B
																		10855	HPSE	84295	PHF6	5530	PPP3CA
																		10858	CYP46A1	84444	DOT1L	5532	PPP3CB
																		10859	LILRB1	8450	CUL4B	55327	LIN7C
																		10861	SLC26A1	8452	CUL3	5533	PPP3CC
																		10863	ADAM28	8453	CUL2	5534	PPP3R1
																		10867	TSPAN9	8458	TTF2	5552	SRGN
																		10868	USP20	84629	TNRC18	55530	SVOP
																		10869	USP19	8467	SMARCA5	55607	PPP1R9A
																		10870	HCST	8470	SORBS2	55619	DOCK10
																		10871	CD300C	84878	ZBTB45	5566	PRKACA
																		10873	ME3	8507	ENC1	55714	TENM3
																		10874	NMU	8517	IKBKG	5573	PRKAR1A
																		1088	CEACAM8	8522	GAS7	55737	VPS35
																		10884	MRPS30	8533	COPS3	55738	ARFGAP1
																		10885	WDR3	85446	ZFHX2	5575	PRKAR1B
																		10891	PPARGC1A	8573	CASK	55752	SEPT11
																		10892	MALT1	860	RUNX2	5577	PRKAR2B
																		10894	LYVE1	8609	KLF7	55770	EXOC2
																		10897	YIF1A	861	RUNX1	5578	PRKCA
																		10898	CPSF4	8622	PDE8B	5579	PRKCB
																		10899	JTB	8648	NCOA1	5580	PRKCD
																		109	ADCY3	867	CBL	5581	PRKCE
																		10901	DHRS4	8841	HDAC3	55823	VPS11
																		10902	BRD8	8848	TSC22D1	5584	PRKCI
																		10903	MTMR11	8863	PER3	55851	PSENEN
																		10905	MAN1A2	8864	PER2	55914	ERBB2IP
																		10906	TRAFD1	8914	TIMELESS	5594	MAPK1
																		10907	TXNL4A	8930	MBD4	5595	MAPK3
																		10908	PNPLA6	8932	MBD2	55964	SEPT3
																		10910	SUGT1	9013	TAF1C	5602	MAPK10
																		10914	PAPOLA	90134	KCNH7	5604	MAP2K1
																		10915	TCERG1	90135	BTBD6	56479	KCNQ5
																		10919	EHMT2	9031	BAZ1B	5662	PSD
																		10920	COPS8	9044	BTAF1	5663	PSEN1
																		10922	FASTK	9150	CTDP1	5664	PSEN2
																		10924	SMPDL3A	91752	ZNF804A	56850	GRIPAP1
																		10928	RALBP1	9282	MED14	56899	ANKS1B
																		10933	MORF4L1	9322	TRIP10	56904	SH3GLB2
																		10935	PRDX3	9355	LHX2	57030	SLC17A7
																		10939	AFG3L2	93986	FOXP2	57084	SLC17A6
																		10940	POP1	9439	MED23	57142	RTN4
																		10943	MSL3	9440	MED17	57144	PAK7
																		10944	C11orf58	9479	MAPK8IP1	5728	PTEN
																		10946	SF3A3	9500	MAGED1	57348	TTYH1
																		10947	AP3M2	9513	FXR2	57406	ABHD6
																		10948	STARD3	9572	NR1D1	57447	NDRG2
																		10950	BTG3	9575	CLOCK	57449	PLEKHG5
																		10953	TOMM34	9611	NCOR1	57451	TENM2
																		10955	SERINC3	9612	NCOR2	57460	PPM1H
																		10956	OS9	9619	ABCG1	5747	PTK2
																		10960	LMAN2	9628	RGS6	57497	LRFN2
																		10961	ERP29	9640	ZNF592	57502	NLGN4X
																		10963	STIP1	9681	DEPDC5	57554	LRRC7
																		10964	IFI44L	9682	KDM4A	57555	NLGN2
																		10965	ACOT2	9739	SETD1A	57596	BEGAIN
																		10966	RAB40B	9745	ZNF536	57617	VPS18
																		10969	EBNA1BP2	9757	KMT2B	57622	LRFN1
																		10972	TMED10	9759	HDAC4	5764	PTN
																		10973	ASCC3	9783	RIMS3	57689	LRRC4C
																		10974	ADIRF	9821	RB1CC1	5786	PTPRA
																		10975	UQCR11	9826	ARHGEF11	57863	CADM3
																		10978	CLP1	9839	ZEB2	5789	PTPRD
																		10980	COPS6	9869	SETDB1	5792	PTPRF
																		10981	RAB32	9889	ZBED4	5799	PTPRN2
																		10982	MAPRE2	9915	ARNT2	5800	PTPRO
																		10983	CCNI	9923	ZBTB40	5802	PTPRS
																		10985	GCN1L1	9935	MAFB	5803	PTPRZ1
																		10988	METAP2	9968	MED12	5813	PURA
																		10989	IMMT	9969	MED13	5818	PVRL1
																		10990	LILRB5	9975	NR1D2	58489	ABHD17C
																		10992	SF3B2			58512	DLGAP3
																		10994	ILVBL			58513	EPS15L1
																		10998	SLC27A5			5861	RAB1A
																		10999	SLC27A4			5862	RAB2A
																		11000	SLC27A3			5864	RAB3A
																		11004	KIF2C			5865	RAB3B
																		11006	LILRB4			5867	RAB4A
																		1101	CHAD			5868	RAB5A
																		11010	GLIPR1			5869	RAB5B
																		11014	KDELR2			5870	RAB6A
																		11016	ATF7			5878	RAB5C
																		11017	SNRNP27			5879	RAC1
																		11018	TMED1			5881	RAC3
																		11019	LIAS			5906	RAP1A
																		1102	RCBTB2			5908	RAP1B
																		11020	IFT27			59283	CACNG8
																		11022	TDRKH			59284	CACNG7
																		11027	LILRA2			5970	RELA
																		11031	RAB31			60	ACTB
																		11033	ADAP1			6000	RGS7
																		11037	STON1			6009	RHEB
																		1104	RCC1			60412	EXOC4
																		11046	SLC35D2			6122	RPL3
																		1105	CHD1			6124	RPL4
																		11052	CPSF6			6125	RPL5
																		11054	OGFR			6128	RPL6
																		11056	DDX52			6129	RPL7
																		11057	ABHD2			613	BCR
																		11059	WWP1			6130	RPL7A
																		1106	CHD2			6132	RPL8
																		11060	WWP2			6133	RPL9
																		11061	LECT1			6134	RPL10
																		11062	DUS4L			6135	RPL11
																		11064	CNTRL			6136	RPL12
																		11065	UBE2C			6137	RPL13
																		11066	SNRNP35			6138	RPL15
																		11067	C10orf10			6139	RPL17
																		11068	CYB561D2			6141	RPL18
																		11069	RAPGEF4			6142	RPL18A
																		1107	CHD3			6143	RPL19
																		11076	TPPP			6146	RPL22
																		11078	TRIOBP			6147	RPL23A
																		1108	CHD4			6152	RPL24
																		11080	DNAJB4			6154	RPL26
																		11083	DIDO1			6155	RPL27
																		11092	C9orf9			6156	RPL30
																		11093	ADAMTS13			6157	RPL27A
																		11094	CACFD1			6158	RPL28
																		11097	NUPL2			6159	RPL29
																		11098	PRSS23			6160	RPL31
																		11099	PTPN21			6161	RPL32
																		111	ADCY5			6164	RPL34
																		11100	HNRNPUL1			6165	RPL35A
																		11101	ATE1			6167	RPL37
																		11102	RPP14			6168	RPL37A
																		11103	KRR1			6169	RPL38
																		11104	KATNA1			6173	RPL36A
																		11108	PRDM4			6175	RPLP0
																		1111	CHEK1			6176	RPLP1
																		11112	HIBADH			6181	RPLP2
																		11113	CIT			6187	RPS2
																		11116	FGFR1OP			6188	RPS3
																		11118	BTN3A2			6189	RPS3A
																		11119	BTN3A1			6191	RPS4X
																		1112	FOXN3			6193	RPS5
																		11120	BTN2A1			6194	RPS6
																		11122	PTPRT			6198	RPS6KB1
																		11124	FAF1			6201	RPS7
																		11126	CD160			6202	RPS8
																		11127	KIF3A			6203	RPS9
																		11128	POLR3A			6204	RPS10
																		11129	CLASRP			6205	RPS11
																		1113	CHGA			6206	RPS12
																		11130	ZWINT			6207	RPS13
																		11132	CAPN10			6208	RPS14
																		11133	KPTN			6209	RPS15
																		11135	CDC42EP1			6210	RPS15A
																		11136	SLC7A9			6217	RPS16
																		11137	PWP1			6222	RPS18
																		11138	TBC1D8			6223	RPS19
																		1114	CHGB			6224	RPS20
																		11140	CDC37			6227	RPS21
																		11144	DMC1			6228	RPS23
																		11145	PLA2G16			6229	RPS24
																		11146	GLMN			6230	RPS25
																		11147	HHLA3			6231	RPS26
																		11149	BVES			6232	RPS27
																		11153	FICD			6233	RPS27A
																		11154	AP4S1			6234	RPS28
																		11156	PTP4A3			6272	SORT1
																		11158	RABL2B			6323	SCN1A
																		11160	ERLIN2			6326	SCN2A
																		11163	NUDT4			6334	SCN8A
																		11164	NUDT5			63827	BCAN
																		11167	FSTL1			6386	SDCBP
																		11168	PSIP1			63908	NAPB
																		11169	WDHD1			6405	SEMA3F
																		11170	FAM107A			64072	CDH23
																		11171	STRAP			64084	CLSTN2
																		11173	ADAMTS7			64101	LRRC4
																		11174	ADAMTS6			6421	SFPQ
																		11176	BAZ2A			6449	SGTA
																		11177	BAZ1A			6453	ITSN1
																		11178	LZTS1			6455	SH3GL1
																		11179	ZNF277			6456	SH3GL2
																		11180	WDR6			6457	SH3GL3
																		11182	SLC2A6			64601	VPS16
																		11183	MAP4K5			64840	PORCN
																		11184	MAP4K1			64854	USP46
																		11185	INMT			6500	SKP1
																		11186	RASSF1			65059	RAPH1
																		11188	NISCH			6506	SLC1A2
																		11189	CELF3			65078	RTN4R
																		1119	CHKA			65108	MARCKSL1
																		11190	CEP250			6511	SLC1A6
																		11193	WBP4			65125	WNK1
																		11194	ABCB8			6515	SLC2A3
																		11196	SEC23IP			6520	SLC3A2
																		11198	SUPT16H			65217	PCDH15
																		112	ADCY6			6529	SLC6A1
																		1120	CHKB			6532	SLC6A4
																		11200	CHEK2			6535	SLC6A8
																		11201	POLI			6536	SLC6A9
																		11212	PROSC			6538	SLC6A11
																		11213	IRAK3			6543	SLC8A2
																		11214	AKAP13			6546	SLC8A1
																		11215	AKAP11			6547	SLC8A3
																		11216	AKAP10			6566	SLC16A1
																		11218	DDX20			6571	SLC18A2
																		1122	CHML			6616	SNAP25
																		11221	DUSP10			6620	SNCB
																		11222	MRPL3			6622	SNCA
																		11226	GALNT6			6642	SNX1
																		11228	RASSF8			6678	SPARC
																		1123	CHN1			6709	SPTAN1
																		11231	SEC63			6710	SPTB
																		11232	POLG2			6711	SPTBN1
																		11234	HPS5			6712	SPTBN2
																		11236	RNF139			6714	SRC
																		11238	CA5B			6774	STAT3
																		112399	EGLN3			6780	STAU1
																		1124	CHN2			6790	AURKA
																		11243	PMF1			6792	CDKL5
																		11244	ZHX1			6804	STX1A
																		11245	GPR176			6809	STX3
																		11247	NXPH4			6810	STX4
																		112476	PRRT2			6812	STXBP1
																		112479	ERI2			6814	STXBP3
																		112483	SAT2			6843	VAMP1
																		112487	DTD2			6844	VAMP2
																		112495	GTF3C6			6853	SYN1
																		11252	PACSIN2			6854	SYN2
																		11253	MAN1B1			6855	SYP
																		112574	SNX18			6856	SYPL1
																		11258	DCTN3			6857	SYT1
																		11260	XPOT			6860	SYT4
																		11261	CHP1			6861	SYT5
																		112611	RWDD2A			6900	CNTN2
																		11262	SP140			70	ACTC1
																		11264	PXMP4			7014	TERF2
																		11266	DUSP12			7074	TIAM1
																		11267	SNF8			708	C1QBP
																		11269	DDX19B			71	ACTG1
																		11270	NRM			7143	TNR
																		112703	FAM71E1			7163	TPD52
																		112724	RDH13			7204	TRIO
																		11273	ATXN2L			7248	TSC1
																		11274	USP18			7249	TSC2
																		11275	KLHL2			7284	TUFM
																		112752	IFT43			729956	SHISA7
																		112755	STX1B			729993	SHISA9
																		11276	SYNRG			7311	UBA52
																		11277	TREX1			7337	UBE3A
																		11279	KLF8			7415	VCP
																		112812	FDX1L			7416	VDAC1
																		112817	HOGA1			7425	VGF
																		11282	MGAT4B			7428	VHL
																		11284	PNKP			7466	WFS1
																		112840	WDR89			747	DAGLA
																		112849	L3HYPDH			7474	WNT5A
																		11285	B4GALT7			7476	WNT7A
																		112869	CCDC101			7525	YES1
																		112885	PHF21B			7531	YWHAE
																		112937	GLB1L3			7532	YWHAG
																		112950	MED8			7533	YWHAH
																		113	ADCY7			7534	YWHAZ
																		1130	LYST			773	CACNA1A
																		113000	RPUSD1			774	CACNA1B
																		11309	SLCO2B1			775	CACNA1C
																		11311	VPS45			776	CACNA1D
																		113115	MTFR2			777	CACNA1E
																		113130	CDCA5			781	CACNA2D1
																		11314	CD300A			782	CACNB1
																		11316	COPE			783	CACNB2
																		113174	SAAL1			7846	TUBA1A
																		113178	SCAMP4			785	CACNB4
																		113189	CHST14			7857	SCG2
																		11319	ECD			7879	RAB7A
																		11320	MGAT4A			78999	LRFN4
																		113201	CASC4			79012	CAMKV
																		11321	GPN1			79065	ATG9A
																		11322	TMC6			793	CALB1
																		113235	SLC46A1			794	CALB2
																		113246	C12orf57			79414	LRFN3
																		11325	DDX42			79641	ROGDI
																		113251	LARP4			79971	WLS
																		11326	VSIG4			800	CALD1
																		113263	GLCCI1			80059	LRRTM4
																		113277	TMEM106A			80124	VCPIP1
																		11328	FKBP9			80315	CPEB4
																		11329	STK38			80331	DNAJC5
																		11331	PHB2			80725	SRCIN1
																		11332	ACOT7			80728	ARHGAP39
																		11333	PDAP1			80758	PRR7
																		11335	CBX3			80852	GRIP2
																		11336	EXOC3			80863	PRRT1
																		11337	GABARAP			8087	FXR1
																		11339	OIP5			814	CAMK4
																		11340	EXOSC8			816	CAMK2B
																		113402	SFT2D1			81615	TMEM163
																		11341	SCRG1			8165	AKAP1
																		113419	TEX261			81831	NETO2
																		11342	RNF13			81832	NETO1
																		11343	MGLL			81873	ARPC5L
																		11344	TWF2			81876	RAB1B
																		11345	GABARAPL2			81926	ABHD17A
																		11346	SYNPO			821	CANX
																		1135	CHRNA2			8301	PICALM
																		113510	HELQ			8312	AXIN1
																		113612	CYP2U1			832	CAPZB
																		113655	MFSD3			8321	FZD1
																		113675	SDSL			8322	FZD4
																		1137	CHRNA4			8326	FZD9
																		113791	PIK3IP1			83452	RAB33B
																		1138	CHRNA5			83992	CTTNBP2
																		113802	HENMT1			8404	SPARCL1
																		113829	SLC35A4			84062	DTNBP1
																		113835	ZNF257			84152	PPP1R1B
																		113878	DTX2			84162	KIAA1109
																		1140	CHRNB1			8417	STX7
																		114034	TOE1			84249	PSD2
																		114049	WBSCR22			84251	SGIP1
																		1141	CHRNB2			84258	SYT3
																		114294	LACTB			8452	CUL3
																		114299	PALM2			84557	MAP1LC3A
																		114327	EFHC1			84631	SLITRK2
																		114548	NLRP3			84687	PPP1R9B
																		114569	MAL2			84896	ATAD1
																		114609	TIRAP			8495	PPFIBP2
																		114625	ERMAP			84961	FBXL20
																		114659	LRRC37B			8497	PPFIA4
																		1147	CHUK			8499	PPFIA2
																		114769	CARD16			8500	PPFIA1
																		114781	BTBD9			8506	CNTNAP1
																		114785	MBD6			8514	KCNAB2
																		114786	XKR4			8525	DGKZ
																		114787	GPRIN1			8526	DGKE
																		114788	CSMD3			85358	SHANK3
																		114789	SLC25A25			8536	CAMK1
																		114791	TUBGCP5			8537	BCAS1
																		114792	KLHL32			8541	PPFIA3
																		114793	FMNL2			85439	STON2
																		114794	ELFN2			85440	DOCK7
																		114795	TMEM132B			85445	CNTNAP4
																		114798	SLITRK1			85461	TANC1
																		114800	CCDC85A			8567	MADD
																		114803	MYSM1			8573	CASK
																		114804	RNF157			8618	CADPS
																		114805	GALNT13			8650	NUMB
																		114815	SORCS1			8661	EIF3A
																		114822	RHPN1			8662	EIF3B
																		114823	LENG8			8674	VAMP4
																		114826	SMYD4			8675	STX16
																		114876	OSBPL1A			869	CBLN1
																		114879	OSBPL5			87	ACTN1
																		114880	OSBPL6			8745	ADAM23
																		114881	OSBPL7			8766	RAB11A
																		114882	OSBPL8			8773	SNAP23
																		114883	OSBPL9			8774	NAPG
																		114885	OSBPL11			8775	NAPA
																		114899	C1QTNF3			8777	MPDZ
																		114904	C1QTNF6			8787	RGS9
																		114907	FBXO32			88	ACTN2
																		114908	TMEM123			8828	NRP2
																		114926	SMIM19			8829	NRP1
																		114932	MRFAP1L1			8831	SYNGAP1
																		114971	PTPMT1			8851	CDK5R1
																		114991	ZNF618			8867	SYNJ1
																		115024	NT5C3B			8871	SYNJ2
																		115098	CCDC124			8874	ARHGEF7
																		115106	HAUS1			8880	FUBP1
																		115123	MARCH3			8905	AP1S2
																		115196	ZNF554			8912	CACNA1H
																		1152	CKB			8927	BSN
																		115207	KCTD12			8936	WASF1
																		115209	OMA1			8943	AP3D1
																		115273	RAB42			8976	WASL
																		115286	SLC25A26			8997	KALRN
																		115290	FBXO17			9026	HIP1R
																		115294	PCMTD1			9045	RPL14
																		1153	CIRBP			9066	SYT7
																		115353	LRRC42			9101	USP8
																		115361	GBP4			9114	ATP6V0D1
																		1154	CISH			9118	INA
																		115416	MALSU1			9123	SLC16A3
																		115426	UHRF2			9143	SYNGR3
																		1155	TBCB			9144	SYNGR2
																		115509	ZNF689			9145	SYNGR1
																		115548	FCHO2			91584	PLXNA4
																		115560	ZNF501			9170	LPAR2
																		115703	ARHGAP33			9181	ARHGEF2
																		115708	TRMT61A			9194	SLC16A7
																		115727	RASGRP4			9211	LGI1
																		115752	DIS3L			9218	VAPA
																		115761	ARL11			9223	MAGI1
																		115811	IQCD			9228	DLGAP2
																		115817	DHRS1			9229	DLGAP1
																		115825	WDFY2			9230	RAB11B
																		115827	RAB3C			9231	DLG5
																		1159	CKMT1B			9253	NUMBL
																		115908	CTHRC1			9256	BZRAP1
																		115939	TSR3			9266	CYTH2
																		115992	RNF166			9267	CYTH1
																		116	ADCYAP1			9296	ATP6V1F
																		116028	RMI2			93145	OLFM2
																		116064	LRRC58			9341	VAMP3
																		116068	LYSMD3			9342	SNAP29
																		116092	DNTTIP1			9344	TAOK2
																		1161	ERCC8			9349	RPL23
																		116113	FOXP4			9369	NRXN3
																		116115	ZNF526			9378	NRXN1
																		116135	LRRC3B			94030	LRRC4B
																		116143	WDR92			9419	CRIPT
																		116151	FAM210B			9423	NTN1
																		116154	PHACTR3			9444	QKI
																		116159	CYYR1			9454	HOMER3
																		116173	CMTM5			9456	HOMER1
																		116225	ZMYND19			9463	PICK1
																		116228	COX20			9465	AKAP7
																		116236	ABHD15			9475	ROCK2
																		116238	TLCD1			9495	AKAP5
																		116254	GINM1			9513	FXR2
																		116328	C8orf34			9515	STXBP5L
																		116372	LYPD1			9522	SCAMP1
																		1164	CKS2			9542	NRG2
																		116447	TOP1MT			9550	ATP6V1G1
																		116448	OLIG1			9554	SEC22B
																		116461	TSEN15			9568	GABBR2
																		116496	FAM129A			9590	AKAP12
																		116540	MRPL53			9638	FEZ1
																		116541	MRPL54			9698	PUM1
																		116832	RPL39L			9699	RIMS2
																		116840	CNTROB			9722	NOS1AP
																		116841	SNAP47			9746	CLSTN3
																		116842	LEAP2			9758	FRMPD4
																		116843	SLC18B1			9762	LZTS3
																		116931	MED12L			9775	EIF4A3
																		116966	WDR17			9783	RIMS3
																		116983	ACAP3			9815	GIT2
																		116984	ARAP2			9829	DNAJC6
																		116985	ARAP1			9863	MAGI2
																		116986	AGAP2			989	SEPT7
																		116987	AGAP1			9890	LPPR4
																		116988	AGAP3			9892	SNAP91
																		117	ADCYAP1R1			9899	SV2B
																		117143	TADA1			9900	SV2A
																		117145	THEM4			9912	ARHGAP44
																		117155	CATSPER2			9921	RNF10
																		117166	WFIKKN1			9922	IQSEC1
																		117177	RAB3IP			998	CDC42
																		117178	SSX2IP
																		117246	FTSJ3
																		117289	TAGAP
																		1173	AP2M1
																		1174	AP1S1
																		117583	PARD3B
																		1176	AP3S1
																		118	ADD1
																		1182	CLCN3
																		1184	CLCN5
																		118424	UBE2J2
																		118426	LOH12CR1
																		118427	OLFM3
																		118429	ANTXR2
																		118472	ZNF511
																		118487	CHCHD1
																		1185	CLCN6
																		1186	CLCN7
																		118672	PSTK
																		118738	ZNF488
																		118788	PIK3AP1
																		118812	MORN4
																		118813	ZFYVE27
																		118881	COMTD1
																		118924	FRA10AC1
																		118980	SFXN2
																		119	ADD2
																		119032	C10orf32
																		1191	CLU
																		1192	CLIC1
																		119392	SFR1
																		1195	CLK1
																		119504	ANAPC16
																		119559	SFXN4
																		1196	CLK2
																		119710	C11orf74
																		1198	CLK3
																		120	ADD3
																		1200	TPP1
																		1201	CLN3
																		120103	SLC36A4
																		120114	FAT3
																		120224	TMEM45B
																		120227	CYP2R1
																		1203	CLN5
																		120526	DNAJC24
																		120534	ARL14EP
																		1207	CLNS1A
																		120892	LRRK2
																		1209	CLPTM1
																		120939	TMEM52B
																		121053	C12orf45
																		1212	CLTB
																		121227	LRIG3
																		121256	TMEM132D
																		121260	SLC15A4
																		121274	ZNF641
																		1213	CLTC
																		121441	NEDD1
																		121457	IKBIP
																		121512	FGD4
																		121536	AEBP2
																		121601	ANO4
																		121642	ALKBH2
																		121643	FOXN4
																		121665	SPPL3
																		122060	SLAIN1
																		122416	ANKRD9
																		122509	IFI27L1
																		122525	C14orf28
																		122553	TRAPPC6B
																		122616	C14orf79
																		122618	PLD4
																		122704	MRPL52
																		122769	LRR1
																		122773	KLHDC1
																		122786	FRMD6
																		122809	SOCS4
																		122961	ISCA2
																		123	PLIN2
																		123016	TTC8
																		123036	TC2N
																		123041	SLC24A4
																		123096	SLC25A29
																		123169	LEO1
																		123207	C15orf40
																		123228	SENP8
																		123263	MTFMT
																		123283	TARSL2
																		123355	LRRC28
																		1235	CCR6
																		123606	NIPA1
																		123720	WHAMM
																		123722	FSD2
																		123775	C16orf46
																		123803	NTAN1
																		123811	FOPNL
																		123920	CMTM3
																		1240	CMKLR1
																		124044	SPATA2L
																		124045	SPATA33
																		124152	IQCK
																		124222	PAQR4
																		124245	ZC3H18
																		124401	ANKS3
																		124411	ZNF720
																		124446	TMEM219
																		124454	EARS2
																		124491	TMEM170A
																		124540	MSI2
																		124565	SLC38A10
																		124583	CANT1
																		124637	CYB5D1
																		124739	USP43
																		124751	KRBA2
																		124790	HEXIM2
																		124808	CCDC43
																		124923	SGK494
																		124925	SEZ6
																		124930	ANKRD13B
																		124935	SLC43A2
																		124936	CYB5D2
																		124961	ZFP3
																		124976	SPNS2
																		124989	EFCAB13
																		124995	MRPL10
																		124997	WDR81
																		125058	TBC1D16
																		125061	AFMID
																		125150	ZSWIM7
																		125228	FAM210A
																		125476	INO80C
																		125488	TTC39C
																		125704	FAM69C
																		125875	CLDND2
																		125919	ZNF543
																		125950	RAVER1
																		125988	C19orf70
																		126014	OSCAR
																		126068	ZNF441
																		126070	ZNF440
																		126074	SWSAP1
																		126075	CCDC159
																		126129	CPT1C
																		126133	ALDH16A1
																		126205	NLRP8
																		126231	ZNF573
																		126259	TMIGD2
																		126272	EID2B
																		126295	ZNF57
																		126298	IRGQ
																		1263	PLK3
																		126308	MOB3A
																		126321	MFSD12
																		126374	WTIP
																		126382	NR2C2AP
																		126432	RINL
																		126433	FBXO27
																		1265	CNN2
																		126526	C19orf47
																		1266	CNN3
																		1267	CNP
																		126731	CCSAP
																		126789	PUSL1
																		126792	B3GALT6
																		126823	KLHDC9
																		126868	MAB21L3
																		127002	ATXN7L2
																		127003	C1orf194
																		127018	LYPLAL1
																		1271	CNTFR
																		1272	CNTN1
																		127253	TYW3
																		127262	TPRG1L
																		127281	FAM213B
																		127396	ZNF684
																		127428	TCEANC2
																		127495	LRRC39
																		127544	RNF19B
																		127602	DNAH14
																		127687	C1orf122
																		1277	COL1A1
																		127700	OSCP1
																		127703	C1orf216
																		1278	COL1A2
																		127829	ARL8A
																		127933	UHMK1
																		128	ADH5
																		128061	C1orf131
																		128077	LIX1L
																		1281	COL3A1
																		1282	COL4A1
																		128239	IQGAP3
																		128240	APOA1BP
																		128272	ARHGEF19
																		128308	MRPL55
																		128338	DRAM2
																		128346	C1orf162
																		128387	TATDN3
																		1284	COL4A2
																		128414	NKAIN4
																		128434	VSTM2L
																		128553	TSHZ2
																		128637	TBC1D20
																		1287	COL4A5
																		128710	SLX4IP
																		1288	COL4A6
																		128869	PIGU
																		128977	C22orf39
																		128989	TANGO2
																		1290	COL5A2
																		129049	SGSM1
																		129080	EMID1
																		1291	COL6A1
																		129138	ANKRD54
																		1292	COL6A2
																		129285	PPP1R21
																		129293	TRABD2A
																		129303	TMEM150A
																		1294	COL7A1
																		129401	NUP35
																		129450	TYW5
																		129530	LYG1
																		129531	MITD1
																		129563	DIS3L2
																		129642	MBOAT2
																		129684	CNTNAP5
																		129685	TAF8
																		1297	COL9A1
																		129787	TMEM18
																		1298	COL9A2
																		129807	NEU4
																		129831	RBM45
																		129880	BBS5
																		129881	CCDC173
																		1299	COL9A3
																		130026	ICA1L
																		130074	FAM168B
																		1301	COL11A1
																		130132	RFTN2
																		130162	CLHC1
																		1302	COL11A2
																		130271	PLEKHH2
																		1303	COL12A1
																		130340	AP1S3
																		130355	C2orf76
																		130502	TTC32
																		130507	UBR3
																		130535	KCTD18
																		130574	LYPD6
																		130589	GALM
																		1306	COL15A1
																		130612	TMEM198
																		130617	ZFAND2B
																		1307	COL16A1
																		130814	PQLC3
																		130872	AHSA2
																		130888	FBXO36
																		130940	CCDC148
																		131034	CPNE4
																		131076	CCDC58
																		131096	KCNH8
																		131118	DNAJC19
																		1312	COMT
																		131408	FAM131A
																		131474	CHCHD4
																		1315	COPB1
																		131544	CRYBG3
																		131566	DCBLD2
																		131601	TPRA1
																		131616	TMEM42
																		1317	SLC31A1
																		1318	SLC31A2
																		131870	NUDT16
																		131965	METTL6
																		132	ADK
																		132001	TAMM41
																		132158	GLYCTK
																		132160	PPM1M
																		132203	SNTN
																		132204	SYNPR
																		132299	OCIAD2
																		132320	SCLT1
																		132321	C4orf33
																		1326	MAP3K8
																		132660	LIN54
																		1327	COX4I1
																		132720	C4orf32
																		132789	GNPDA2
																		132864	CPEB2
																		1329	COX5B
																		132946	ARL9
																		132949	AASDH
																		133	ADM
																		133015	PACRGL
																		133022	TRAM1L1
																		133121	ENPP6
																		133308	SLC9B2
																		133619	PRRC1
																		133686	NADK2
																		1337	COX6A1
																		133746	JMY
																		133957	CCDC127
																		134121	C5orf49
																		134145	FAM173B
																		134147	CMBL
																		134218	DNAJC21
																		134266	GRPEL2
																		134353	LSM11
																		134359	POC5
																		134429	STARD4
																		134430	WDR36
																		134492	NUDCD2
																		1345	COX6C
																		134510	UBLCP1
																		134549	SHROOM1
																		1346	COX7A1
																		134637	ADAT2
																		1347	COX7A2
																		134701	RIPPLY2
																		134728	IRAK1BP1
																		134829	CLVS2
																		134957	STXBP5
																		135112	NCOA7
																		135114	HINT3
																		135152	B3GAT2
																		1352	COX10
																		135293	PM20D2
																		135295	SRSF12
																		1353	COX11
																		1355	COX15
																		136	ADORA2B
																		136051	ZNF786
																		1362	CPD
																		136227	COL26A1
																		136647	MPLKIP
																		1368	CPM
																		1371	CPOX
																		137392	FAM92A1
																		1374	CPT1A
																		137492	VPS37A
																		1376	CPT2
																		137682	NDUFAF6
																		137695	TMEM68
																		1378	CR1
																		137872	ADHFE1
																		137886	UBXN2B
																		137964	AGPAT6
																		137970	UNC5D
																		137994	LETM2
																		138046	RALYL
																		138050	HGSNAT
																		1381	CRABP1
																		138151	NACC2
																		138162	C9orf116
																		1382	CRABP2
																		138241	C9orf85
																		138311	FAM69B
																		1384	CRAT
																		138428	PTRH1
																		1385	CREB1
																		1386	ATF2
																		138639	PTPDC1
																		1387	CREBBP
																		1388	ATF6B
																		1389	CREBL2
																		1390	CREM
																		139065	SLITRK4
																		139324	HDX
																		139341	FUNDC1
																		1395	CRHR2
																		139596	UPRT
																		139599	MAGEE2
																		1396	CRIP1
																		1397	CRIP2
																		139728	PNCK
																		139818	DOCK11
																		1399	CRKL
																		14	AAMP
																		140	ADORA3
																		1400	CRMP1
																		140290	TCP10L
																		1404	HAPLN1
																		140459	ASB6
																		140461	ASB8
																		140465	MYL6B
																		140576	S100A16
																		1406	CRX
																		140606	SELM
																		140609	NEK7
																		140612	ZFP28
																		140680	C20orf96
																		140685	ZBTB46
																		140690	CTCFL
																		140691	TRIM69
																		1407	CRY1
																		140700	SAMD10
																		140701	ABHD16B
																		140707	BRI3BP
																		140710	SOGA1
																		140733	MACROD2
																		140767	NRSN1
																		1408	CRY2
																		140809	SRXN1
																		140825	NEURL2
																		140838	NANP
																		140883	ZNF280B
																		140885	SIRPA
																		140890	SREK1
																		141	ADPRH
																		1410	CRYAB
																		1414	CRYBB1
																		142	PARP1
																		1421	CRYGD
																		142678	MIB2
																		142679	DUSP19
																		1427	CRYGS
																		1428	CRYM
																		142891	SAMD8
																		1429	CRYZ
																		142940	TRUB1
																		143	PARP4
																		143187	VTI1A
																		143279	HECTD2
																		143282	FGFBP3
																		143384	CACUL1
																		1434	CSE1L
																		143458	LDLRAD3
																		143570	XRRA1
																		1436	CSF1R
																		143684	FAM76B
																		143686	SESN3
																		143689	PIWIL4
																		143879	KBTBD3
																		143884	CWF19L2
																		143888	KDELC2
																		1439	CSF2RB
																		1441	CSF3R
																		144108	SPTY2D1
																		144110	TMEM86A
																		144165	PRICKLE1
																		144233	BCDIN3D
																		144245	ALG10B
																		144348	ZNF664
																		144363	LYRM5
																		144402	CPNE8
																		144404	TMEM120B
																		144406	WDR66
																		144455	E2F7
																		144717	FAM109A
																		144811	LACC1
																		144983	HNRNPA1L2
																		145173	B3GALTL
																		145389	SLC38A6
																		145407	C14orf37
																		145482	PTGR2
																		145483	FAM161B
																		1455	CSNK1G2
																		145508	CEP128
																		145567	TTC7B
																		145581	LRFN5
																		1457	CSNK2A1
																		145748	LYSMD4
																		145773	FAM81A
																		145864	HAPLN3
																		146050	ZSCAN29
																		146057	TTBK2
																		146059	CDAN1
																		146198	ZFP90
																		1462	VCAN
																		146223	CMTM4
																		1463	NCAN
																		1464	CSPG4
																		1465	CSRP1
																		146540	ZNF785
																		146542	ZNF688
																		1466	CSRP2
																		146664	MGAT5B
																		146691	TOM1L2
																		146705	ENTHD2
																		146712	B3GNTL1
																		146722	CD300LF
																		1468	SLC25A10
																		146850	PIK3R6
																		146857	SLFN13
																		146909	KIF18B
																		146923	RUNDC1
																		146956	EME1
																		147007	TMEM199
																		147011	PROCA1
																		147015	DHRS13
																		1471	CST3
																		147138	TMC8
																		147166	TRIM16L
																		147179	WIPF2
																		147184	TMEM99
																		147339	C18orf25
																		147372	CCBE1
																		147381	CBLN2
																		147495	APCDD1
																		1476	CSTB
																		147657	ZNF480
																		147660	ZNF578
																		147685	C19orf18
																		147686	ZNF418
																		147687	ZNF417
																		147694	ZNF548
																		1477	CSTF1
																		1478	CSTF2
																		147807	ZNF524
																		147841	SPC24
																		1479	CSTF3
																		147912	SIX5
																		147923	ZNF420
																		147929	ZNF565
																		147949	ZNF583
																		147965	FAM98C
																		147991	DPY19L3
																		148014	TTC9B
																		148022	TICAM1
																		148103	ZNF599
																		148156	ZNF558
																		148203	ZNF738
																		148206	ZNF714
																		148213	ZNF681
																		148223	C19orf25
																		148254	ZNF555
																		148266	ZNF569
																		148281	SYT6
																		148327	CREB3L4
																		148362	BROX
																		148423	C1orf52
																		148534	TMEM56
																		1486	CTBS
																		148741	ANKRD35
																		148789	B3GALNT2
																		1488	CTBP2
																		148808	MFSD4
																		148867	SLC30A7
																		148932	MOB3C
																		1490	CTGF
																		149041	RC3H1
																		1491	CTH
																		149111	CNIH3
																		149175	MANEAL
																		149345	SHISA4
																		149371	EXOC8
																		149420	PDIK1L
																		149428	BNIPL
																		149473	CCDC24
																		1495	CTNNA1
																		1496	CTNNA2
																		1497	CTNS
																		149840	C20orf196
																		149951	COMMD7
																		149986	LSM14B
																		150094	SIK1
																		150209	AIFM3
																		150223	YDJC
																		150274	HSCB
																		150275	CCDC117
																		150290	DUSP18
																		1503	CTPS1
																		150372	NFAM1
																		150383	CDPF1
																		150468	CKAP2L
																		1506	CTRL
																		150678	MYEOV2
																		150684	COMMD1
																		150696	PROM2
																		150709	ANKAR
																		150726	FBXO41
																		150763	GPAT2
																		150864	FAM117B
																		1509	CTSD
																		151011	SEPT10
																		151050	KANSL1L
																		151126	ZNF385B
																		151188	ARL6IP6
																		151194	METTL21A
																		1512	CTSH
																		151230	KLHL23
																		151246	SGOL2
																		1513	CTSK
																		151306	GPBAR1
																		151313	FAHD2B
																		151354	FAM84A
																		1514	CTSL
																		151473	SLC16A14
																		1515	CTSV
																		151525	WDSUB1
																		151556	GPR155
																		151613	TTC14
																		151636	DTX3L
																		151648	SGOL1
																		151827	LRRC34
																		151887	CCDC80
																		1519	CTSO
																		151903	CCDC12
																		151963	MB21D2
																		1520	CTSS
																		152002	XXYLT1
																		152006	RNF38
																		152007	GLIPR2
																		152100	CMC1
																		152137	CCDC50
																		152185	SPICE1
																		1522	CTSZ
																		1523	CUX1
																		152330	CNTN4
																		1524	CX3CR1
																		152404	IGSF11
																		152485	ZNF827
																		1525	CXADR
																		152503	SH3D19
																		152518	NFXL1
																		152559	PAQR3
																		152579	SCFD2
																		152687	ZNF595
																		152756	FAM218A
																		152789	JAKMIP1
																		1528	CYB5A
																		152815	THAP6
																		152816	C4orf26
																		152926	PPM1K
																		153020	RASGEF1B
																		153129	SLC38A9
																		153201	SLC36A2
																		153241	CEP120
																		153328	SLC25A48
																		153364	MBLAC2
																		153396	TMEM161B
																		153443	SRFBP1
																		153478	PLEKHG4B
																		1535	CYBA
																		153642	ARSK
																		153733	CCDC112
																		153768	PRELID2
																		153830	RNF145
																		154	ADRB2
																		1540	CYLD
																		154007	SNRNP48
																		154043	CNKSR3
																		154091	SLC2A12
																		154141	MBOAT1
																		154214	RNF217
																		154215	NKAIN2
																		1544	CYP1A2
																		154467	CCDC167
																		154661	RUNDC3B
																		154664	ABCA13
																		154791	C7orf55
																		154796	AMOT
																		154810	AMOTL1
																		154881	KCTD7
																		155006	TMEM213
																		155038	GIMAP8
																		155054	ZNF425
																		155061	ZNF746
																		155066	ATP6V0E2
																		156	ADRBK1
																		157	ADRBK2
																		157285	SGK223
																		157313	CDCA2
																		157378	TMEM65
																		157570	ESCO2
																		157574	FBXO16
																		157638	FAM84B
																		157657	C8orf37
																		157680	VPS13B
																		157695	TDRP
																		157697	ERICH1
																		157753	TMEM74
																		157769	FAM91A1
																		157777	MCMDC2
																		157807	CLVS1
																		157869	SBSPON
																		157922	CAMSAP1
																		157983	C9orf66
																		158	ADSL
																		158056	MAMDC4
																		1582	CYP8B1
																		158234	TRMT10B
																		158401	C9orf84
																		158405	KIAA1958
																		158427	TSTD2
																		158471	PRUNE2
																		158866	ZDHHC15
																		159	ADSS
																		159013	CXorf38
																		159090	FAM122B
																		159091	FAM122C
																		159195	USP54
																		1592	CYP26A1
																		1593	CYP27A1
																		1595	CYP51A1
																		16	AARS
																		1600	DAB1
																		1601	DAB2
																		160287	LDHAL6A
																		160335	TMTC2
																		1604	CD55
																		160418	TMTC3
																		160428	ALDH1L2
																		160518	DENND5B
																		1606	DGKA
																		1607	DGKB
																		160760	PPTC7
																		160851	DGKH
																		160857	CCDC122
																		160897	GPR180
																		1609	DGKQ
																		161	AP2A2
																		1611	DAP
																		161145	TMEM229B
																		1612	DAPK1
																		161253	REM2
																		1613	DAPK3
																		161357	MDGA2
																		161424	NOP9
																		161436	EML5
																		1615	DARS
																		1616	DAXX
																		161742	SPRED1
																		161823	ADAL
																		162	AP1B1
																		162073	ITPRIPL2
																		1622	DBI
																		162239	ZFP1
																		162282	ANKFN1
																		162427	FAM134C
																		162494	RHBDL3
																		162655	ZNF519
																		162681	C18orf54
																		1627	DBN1
																		1629	DBT
																		162962	ZNF836
																		162963	ZNF610
																		162967	ZNF320
																		162972	ZNF550
																		162989	DEDD2
																		163	AP2B1
																		1630	DCC
																		163049	ZNF791
																		163050	ZNF564
																		163051	ZNF709
																		163059	ZNF433
																		163071	ZNF114
																		163081	ZNF567
																		163087	ZNF383
																		163115	ZNF781
																		163131	ZNF780B
																		163175	LGI4
																		1632	ECI1
																		163227	ZNF100
																		163255	ZNF540
																		1633	DCK
																		1634	DCN
																		163404	LPPR5
																		163486	DENND1B
																		1635	DCTD
																		163590	TOR1AIP2
																		163702	IFNLR1
																		163786	SASS6
																		1638	DCT
																		163859	SDE2
																		163882	CNST
																		1639	DCTN1
																		164	AP1G1
																		164045	HFM1
																		164091	PAQR7
																		1641	DCX
																		1643	DDB2
																		1645	AKR1C1
																		1646	AKR1C2
																		1647	GADD45A
																		164832	LONRF2
																		1649	DDIT3
																		165	AEBP1
																		1650	DDOST
																		165055	CCDC138
																		165215	FAM171B
																		1653	DDX1
																		165324	UBXN2A
																		1655	DDX5
																		165631	PARP15
																		1657	DMXL1
																		1659	DHX8
																		165918	RNF168
																		1660	DHX9
																		1662	DDX10
																		166336	PRICKLE2
																		166348	KBTBD12
																		166378	SPATA5
																		1666	DECR1
																		166614	DCLK2
																		166655	TRIM60
																		166785	MMAA
																		166793	ZBTB49
																		167153	PAPD4
																		167227	DCP2
																		167410	LIX1
																		1675	CFD
																		1676	DFFA
																		167681	PRSS35
																		167691	LCA5
																		1677	DFFB
																		168374	ZNF92
																		168451	THAP5
																		168544	ZNF467
																		1687	DFNA5
																		168850	ZNF800
																		1690	COCH
																		169166	SNX31
																		169200	TMEM64
																		169270	ZNF596
																		169714	QSOX2
																		169792	GLIS3
																		170082	TCEANC
																		170261	ZCCHC12
																		170371	C10orf128
																		170394	PWWP2B
																		170463	SSBP4
																		170506	DHX36
																		170622	COMMD6
																		170626	XAGE3
																		170691	ADAMTS17
																		170954	PPP1R18
																		170959	ZNF431
																		170960	ZNF721
																		170961	ANKRD24
																		171017	ZNF384
																		171023	ASXL1
																		171392	ZNF675
																		171568	POLR3H
																		171586	ABHD3
																		1716	DGUOK
																		1717	DHCR7
																		1718	DHCR24
																		1719	DHFR
																		1723	DHODH
																		1725	DHPS
																		1727	CYB5R3
																		1728	NQO1
																		1729	DIAPH1
																		1730	DIAPH2
																		1731	SEPT1
																		1734	DIO2
																		1737	DLAT
																		1738	DLD
																		1739	DLG1
																		1740	DLG2
																		1742	DLG4
																		1743	DLST
																		1749	DLX5
																		175	AGA
																		1756	DMD
																		1759	DNM1
																		1760	DMPK
																		1762	DMWD
																		1763	DNA2
																		1767	DNAH5
																		177	AGER
																		1773	DNASE1
																		1777	DNASE2
																		1778	DYNC1H1
																		178	AGL
																		1780	DYNC1I1
																		1781	DYNC1I2
																		1783	DYNC1LI2
																		1785	DNM2
																		1786	DNMT1
																		1787	TRDMT1
																		1788	DNMT3A
																		1789	DNMT3B
																		1793	DOCK1
																		1794	DOCK2
																		1795	DOCK3
																		1796	DOK1
																		1798	DPAGT1
																		18	ABAT
																		1802	DPH2
																		1803	DPP4
																		1804	DPP6
																		1806	DPYD
																		1808	DPYSL2
																		1815	DRD4
																		1819	DRG2
																		1820	ARID3A
																		1821	DRP2
																		1822	ATN1
																		1824	DSC2
																		1826	DSCAM
																		1827	RCAN1
																		1829	DSG2
																		183	AGT
																		1830	DSG3
																		1836	SLC26A2
																		1837	DTNA
																		1838	DTNB
																		1840	DTX1
																		1841	DTYMK
																		1843	DUSP1
																		1846	DUSP4
																		1850	DUSP8
																		1854	DUT
																		1855	DVL1
																		1856	DVL2
																		1857	DVL3
																		1859	DYRK1A
																		1861	TOR1A
																		1870	E2F2
																		1871	E2F3
																		1874	E2F4
																		1877	E4F1
																		1880	GPR183
																		1889	ECE1
																		1890	TYMP
																		1891	ECH1
																		1892	ECHS1
																		1894	ECT2
																		19	ABCA1
																		1902	LPAR1
																		1903	S1PR3
																		191	AHCY
																		1910	EDNRB
																		1911	PHC1
																		1912	PHC2
																		192111	PGAM5
																		192134	B3GNT6
																		192286	HIGD2A
																		192670	AGO4
																		192683	SCAMP5
																		1933	EEF1B2
																		1936	EEF1D
																		1938	EEF2
																		1939	EIF2D
																		1943	EFNA2
																		1944	EFNA3
																		1945	EFNA4
																		1949	EFNB3
																		1951	CELSR3
																		1952	CELSR2
																		1953	MEGF6
																		1954	MEGF8
																		1955	MEGF9
																		1956	EGFR
																		1958	EGR1
																		195828	ZNF367
																		1959	EGR2
																		196	AHR
																		196051	PPAPDC1A
																		196074	METTL15
																		196264	MPZL3
																		196294	IMMP1L
																		196383	RILPL2
																		196385	DNAH10
																		196394	AMN1
																		196441	ZFC3H1
																		1965	EIF2S1
																		196500	PIANP
																		196513	DCP1B
																		196527	ANO6
																		196528	ARID2
																		1967	EIF2B1
																		196740	VSTM4
																		196743	PAOX
																		196792	FAM24B
																		1968	EIF2S3
																		1969	EPHA2
																		197131	UBR1
																		197258	FUK
																		197259	MLKL
																		197322	ACSF3
																		197335	WDR90
																		197358	NLRC3
																		197370	NSMCE1
																		197407	ZNF48
																		1978	EIF4EBP1
																		1981	EIF4G1
																		1983	EIF5
																		199	AIF1
																		1992	SERPINB1
																		1995	ELAVL3
																		199692	ZNF627
																		199699	DAND5
																		1997	ELF1
																		199704	ZNF585A
																		199745	THAP8
																		199746	U2AF1L4
																		199777	ZNF626
																		199857	ALG14
																		199870	FAM76A
																		199920	C1orf168
																		199953	TMEM201
																		2	A2M
																		20	ABCA2
																		2000	ELF4
																		200014	CC2D1B
																		200185	KRTCAP2
																		200186	CRTC2
																		200205	IBA57
																		200312	RNF215
																		200316	APOBEC3F
																		2004	ELK3
																		2005	ELK4
																		200539	ANKRD23
																		200576	PIKFYVE
																		2006	ELN
																		200728	TMEM17
																		200734	SPRED2
																		200845	KCTD6
																		200894	ARL13B
																		200895	DHFRL1
																		2009	EML1
																		200916	RPL22L1
																		200942	KLHDC8B
																		2011	MARK2
																		201134	CEP112
																		201158	TVP23C
																		201161	CENPV
																		201163	FLCN
																		201164	PLD6
																		201176	ARHGAP27
																		201191	SAMD14
																		201229	LYRM9
																		201255	LRRC45
																		201266	SLC39A11
																		201292	TRIM65
																		201294	UNC13D
																		2013	EMP2
																		201305	SPNS3
																		2014	EMP3
																		201475	RAB12
																		201514	ZNF584
																		201595	STT3B
																		201626	PDE12
																		201627	DENND6A
																		2017	CTTN
																		201725	C4orf46
																		201799	TMEM154
																		201931	TMEM192
																		201965	RWDD4
																		202018	TAPT1
																		202052	DNAJC18
																		202151	RANBP3L
																		2022	ENG
																		202243	CCDC125
																		2023	ENO1
																		202374	STK32A
																		202559	KHDRBS2
																		2026	ENO2
																		2029	ENSA
																		2030	SLC29A1
																		203062	TSNARE1
																		203197	C9orf91
																		203228	C9orf72
																		203245	NAIF1
[truncated: 8,246 more rows]

## Sheet: Supplemental Table S1B
Supplemental Table S1B. Cell numbers of six major cortical cell types and their cell stages.
Cell type
NPCs	290
excitatory neurons	1057
interneurons	701
astrocytes	76
OPCs	117
microglia	68
Cell stage of NPCs		Cell stage of excitatory neurons		Cell stage of interneurons		Cell stage of astrocytes		Cell stage of OPCs		Cell stage of microglia
GW08	3	GW08	15	GW08	3					GW08	2
GW09	50	GW09	35	GW09	3
GW10	84	GW10	93	GW10	7					GW10	2
GW12	12	GW12	63	GW12	7			GW12	2	GW12	1
GW13	7	GW13	16							GW13	1
GW16	123	GW16	545	GW16	83			GW16	14	GW16	11
GW19	5	GW19	82	GW19	22	GW19	6	GW19	4	GW19	1
GW23	2	GW23	90	GW23	174	GW23	7	GW23	25	GW23	10
GW26	4	GW26	118	GW26	402	GW26	63	GW26	72	GW26	40
NPC transition at GW10		NPC transition at GW16
vRG	31	vRG	20
IPCs	51	oRG	66
		IPCs	37

## Sheet: Supplemental Table S1C
Supplemental Table S1C. Co-expression fold enrichment scores of all the GO biological process terms in NPCs calculated using Spearman’s correlation and proportionality phi_s.
Column "GOBP ID": GO biological process ID.
Column "Name": GO biological process name.
Column "Co-expression fold enrichment score (Spearman)": Co-expression fold enrichment score calculated using Spearman’s correlation.
Column "Co-expression fold enrichment score (phi_s)": Co-expression fold enrichment score calculated using proportionality phi_s.
GOBP ID	Name	Co-expression fold enrichment score (Spearman)	Co-expression fold enrichment score (phi_s)
GO:0019083	viral transcription	110.549	175.592
GO:0006415	translational termination	97.7625	155.192
GO:0019080	viral gene expression	87.0276	145.812
GO:0044033	multi-organism metabolic process	83.2235	139.438
GO:0043624	cellular protein complex disassembly	72.0388	120.177
GO:0006414	translational elongation	70.5106	116.366
GO:0086010	membrane depolarization during action potential	69.697	30.303
GO:0051988	regulation of attachment of spindle microtubules to kinetochore	66.6667	66.6667
GO:0006614	SRP-dependent cotranslational protein targeting to membrane	66.2008	114.308
GO:0006613	cotranslational protein targeting to membrane	63.667	110.008
GO:0015669	gas transport	62.2223	102.222
GO:0015671	oxygen transport	62.2223	102.222
GO:0071868	cellular response to monoamine stimulus	62.2223	8.88889
GO:0071870	cellular response to catecholamine stimulus	62.2223	8.88889
GO:0045047	protein targeting to ER	61.2759	105.804
GO:0072599	establishment of protein localization to endoplasmic reticulum	61.2759	105.804
GO:0035235	ionotropic glutamate receptor signaling pathway	58.9744	15.3846
GO:0090224	regulation of spindle organization	57.7778	66.6667
GO:0051383	kinetochore organization	57.5758	39.394
GO:0000184	nuclear-transcribed mRNA catabolic process, nonsense-mediated decay	55.7904	91.3678
GO:0043241	protein complex disassembly	54.3932	92.8572
GO:0007076	mitotic chromosome condensation	53.8462	48.718
GO:0071709	membrane assembly	50.9091	14.5455
GO:0071867	response to monoamine	50.9091	7.27273
GO:0071869	response to catecholamine	50.9091	7.27273
GO:0007212	dopamine receptor signaling pathway	49.5238	9.52382
GO:0070972	protein localization to endoplasmic reticulum	48.6541	84.2616
GO:0032984	macromolecular complex disassembly	48.2353	82.297
GO:0090307	spindle assembly involved in mitosis	41.0257	35.8975
GO:0006413	translational initiation	40.7156	72.5105
GO:0051382	kinetochore assembly	40	31.1111
GO:0000070	mitotic sister chromatid segregation	39.6735	39.1837
GO:0000819	sister chromatid segregation	39.1919	38.5185
GO:0007080	mitotic metaphase plate congression	38.4616	38.4616
GO:0030261	chromosome condensation	38.0953	39.0476
GO:0042274	ribosomal small subunit biogenesis	37.2295	69.2641
GO:0050000	chromosome localization	37.2295	35.4979
GO:0051303	establishment of chromosome localization	37.2295	35.4979
GO:0030490	maturation of SSU-rRNA	36.3637	58.1819
GO:0007215	glutamate receptor signaling pathway	36.2573	14.0351
GO:0017158	regulation of calcium ion-dependent exocytosis	35.8975	10.2564
GO:0006612	protein targeting to membrane	34.4821	60.5334
GO:2000311	regulation of alpha-amino-3-hydroxy-5-methyl-4-isoxazole propionate selective glutamate receptor activity	33.3334	3.0303
GO:0019058	viral life cycle	32.797	64.2721
GO:0007413	axonal fasciculation	31.6667	6.66667
GO:0006268	DNA unwinding involved in DNA replication	31.1111	44.4445
GO:0010765	positive regulation of sodium ion transport	31.1111	13.3333
GO:0086002	cardiac muscle cell action potential involved in contraction	31.1111	13.3333
GO:0051310	metaphase plate congression	30.8824	29.4118
GO:0008038	neuron recognition	30.1994	7.40741
GO:0051983	regulation of chromosome segregation	30.1587	32.8043
GO:0044091	membrane biogenesis	30	8.33334
GO:0046928	regulation of neurotransmitter secretion	29.2398	8.18714
GO:0007158	neuron cell-cell adhesion	29.0909	3.63637
GO:0034199	activation of protein kinase A activity	29.0909	3.63637
GO:0042273	ribosomal large subunit biogenesis	28.5714	46.1539
GO:0040001	establishment of mitotic spindle localization	28.2051	33.3334
GO:0007189	adenylate cyclase-activating G-protein coupled receptor signaling pathway	27.9412	4.41177
GO:0031577	spindle checkpoint	27.9279	29.4294
GO:0021952	central nervous system projection neuron axonogenesis	27.3684	10.5263
GO:0007052	mitotic spindle organization	27.1265	22.069
GO:0001508	action potential	27.027	9.95733
GO:0035249	synaptic transmission, glutamatergic	26.8398	6.06061
GO:0019226	transmission of nerve impulse	26.8116	7.24638
GO:0048485	sympathetic nervous system development	26.6667	13.3333
GO:0060292	long term synaptic depression	26.6667	0
GO:0097090	presynaptic membrane organization	26.6667	0
GO:1902850	microtubule cytoskeleton organization involved in mitosis	26.6667	23.3333
GO:0045132	meiotic chromosome segregation	26.3736	21.978
GO:0019228	neuronal action potential	25.4546	0
GO:0051899	membrane depolarization	25.1773	7.80142
GO:0014047	glutamate secretion	25	6.66667
GO:0035637	multicellular organismal signaling	23.7237	8.40841
GO:0006271	DNA strand elongation involved in DNA replication	23.5294	43.1373
GO:0042596	fear response	23.3333	11.6667
GO:1900449	regulation of glutamate receptor signaling pathway	23.3333	1.66667
GO:0086004	regulation of cardiac muscle cell contraction	22.8572	11.4286
GO:1903115	regulation of actin filament-based movement	22.8572	11.4286
GO:0000956	nuclear-transcribed mRNA catabolic process	22.736	39.5721
GO:0022616	DNA strand elongation	22.521	41.3446
GO:0031338	regulation of vesicle fusion	22.2222	8.88889
GO:0031998	regulation of fatty acid beta-oxidation	22.2222	0
GO:0048715	negative regulation of oligodendrocyte differentiation	22.2222	17.7778
GO:0070509	calcium ion import	22.2222	8.88889
GO:2000649	regulation of sodium ion transmembrane transporter activity	21.978	8.79121
GO:0007059	chromosome segregation	21.8963	21.7293
GO:0086065	cell communication involved in cardiac conduction	21.8182	7.27273
GO:0060079	regulation of excitatory postsynaptic membrane potential	21.6524	5.69801
GO:0008045	motor neuron axon guidance	21.2121	3.0303
GO:0086001	cardiac muscle cell action potential	21.2121	9.09091
GO:0048813	dendrite morphogenesis	21.0339	4.63458
GO:0060078	regulation of postsynaptic membrane potential	20.6897	4.92611
GO:0006402	mRNA catabolic process	20.6089	35.9335
GO:0048841	regulation of axon extension involved in axon guidance	20.5128	7.69231
GO:0050848	regulation of calcium-mediated signaling	20.5128	12.8205
GO:0090150	establishment of protein localization to membrane	20.5053	38.0729
GO:0071174	mitotic spindle checkpoint	20.1613	21.371
GO:0034508	centromere complex assembly	19.7701	19.7701
GO:0007202	activation of phospholipase C activity	19.5767	6.34921
GO:0045841	negative regulation of mitotic metaphase/anaphase transition	19.3549	20.5645
GO:0071173	spindle assembly checkpoint	19.3549	21.0753
GO:1902100	negative regulation of metaphase/anaphase transition of cell cycle	19.3549	20.5645
GO:0051588	regulation of neurotransmitter transport	19.0769	4.30769
GO:0034080	centromere-specific nucleosome assembly	19.0476	19.0476
GO:0045840	positive regulation of mitosis	19.0476	19.0476
GO:0051966	regulation of synaptic transmission, glutamatergic	19.0476	5.19481
GO:1902667	regulation of axon guidance	19.0476	7.61905
GO:0007270	neuron-neuron synaptic transmission	18.9516	5.64516
GO:0033555	multicellular organismal response to stress	18.9247	6.45162
GO:0071377	cellular response to glucagon stimulus	18.8406	3.62319
GO:0007094	mitotic spindle assembly checkpoint	18.3908	19.7701
GO:0021889	olfactory bulb interneuron differentiation	18.1818	10.9091
GO:0050919	negative chemotaxis	18.1818	14.5455
GO:0060045	positive regulation of cardiac muscle cell proliferation	18.1818	14.5455
GO:0021955	central nervous system neuron axonogenesis	18	6.66667
GO:0009190	cyclic nucleotide biosynthetic process	17.9487	5.12821
GO:0052652	cyclic purine nucleotide metabolic process	17.9487	5.12821
GO:1901655	cellular response to ketone	17.9487	0
GO:0022038	corpus callosum development	17.7778	8.88889
GO:0030516	regulation of axon extension	17.7778	3.49207
GO:0051261	protein depolymerization	17.7778	13.3333
GO:0051293	establishment of spindle localization	17.5439	15.2047
GO:0050807	regulation of synapse organization	17.4174	6.60661
GO:0007051	spindle organization	17.3333	14.2456
GO:0001662	behavioral fear response	17.1429	9.52382
GO:0002209	behavioral defense response	17.1429	9.52382
GO:0000281	mitotic cytokinesis	16.9935	16.9935
GO:0006401	RNA catabolic process	16.9548	30.1759
GO:0007157	heterophilic cell-cell adhesion	16.6667	5
GO:0030071	regulation of mitotic metaphase/anaphase transition	16.6667	17.1795
GO:0032467	positive regulation of cytokinesis	16.6667	16.6667
GO:0046717	acid secretion	16.6667	5.7971
GO:0050803	regulation of synapse structure and activity	16.6667	5.64103
GO:1902099	regulation of metaphase/anaphase transition of cell cycle	16.6667	17.1795
GO:1902305	regulation of sodium ion transmembrane transport	16.6667	6.66667
GO:0016079	synaptic vesicle exocytosis	16.6008	3.16206
GO:0007416	synapse assembly	16.5007	0.853486
GO:0006270	DNA replication initiation	16.1905	31.4286
GO:0051963	regulation of synapse assembly	16	4.92308
GO:0007188	adenylate cyclase-modulating G-protein coupled receptor signaling pathway	15.9596	6.26263
GO:0031055	chromatin remodeling at centromere	15.8103	15.8103
GO:0048710	regulation of astrocyte differentiation	15.6863	14.3791
GO:0040036	regulation of fibroblast growth factor receptor signaling pathway	15.3846	7.69231
GO:0051155	positive regulation of striated muscle cell differentiation	15.3846	10.2564
GO:0034502	protein localization to chromosome	15.3333	13.3333
GO:0010863	positive regulation of phospholipase C activity	15.3226	5.64516
GO:0030517	negative regulation of axon extension	15.2381	3.80953
GO:0051602	response to electrical stimulus	15.2381	3.80953
GO:0035850	epithelial cell differentiation involved in kidney development	15.1515	3.0303
GO:2000401	regulation of lymphocyte migration	15.1515	15.1515
GO:0045686	negative regulation of glial cell differentiation	15	15
GO:0007026	negative regulation of microtubule depolymerization	14.7059	10.2941
GO:0034767	positive regulation of ion transmembrane transport	14.5455	3.63637
GO:1990090	cellular response to nerve growth factor stimulus	14.5455	3.63637
GO:1900274	regulation of phospholipase C activity	14.3939	5.30303
GO:0061005	cell differentiation involved in kidney development	14.3791	9.15033
GO:0061387	regulation of extent of cell growth	14.1414	3.0303
GO:0007067	mitotic nuclear division	14.0894	14.3576
GO:0072657	protein localization to membrane	14.0669	24.6707
GO:0031110	regulation of microtubule polymerization or depolymerization	14.0351	8.09717
GO:0007269	neurotransmitter secretion	13.9608	3.92157
GO:0048675	axon extension	13.8528	5.19481
GO:1990138	neuron projection extension	13.8528	5.19481
GO:0048167	regulation of synaptic plasticity	13.6962	2.72169
GO:0043486	histone exchange	13.6752	13.6752
GO:0045839	negative regulation of mitosis	13.6558	14.7937
GO:0048639	positive regulation of developmental growth	13.6364	3.40909
GO:0051489	regulation of filopodium assembly	13.4387	0.790514
GO:0001504	neurotransmitter uptake	13.3333	4.44445
GO:0002063	chondrocyte development	13.3333	4.44445
GO:0006266	DNA ligation	13.3333	17.7778
GO:0007096	regulation of exit from mitosis	13.3333	13.3333
GO:0019985	translesion synthesis	13.3333	22.2222
GO:0043268	positive regulation of potassium ion transport	13.3333	8.88889
GO:0045777	positive regulation of blood pressure	13.3333	8.88889
GO:0050808	synapse organization	13.3333	2.22222
GO:0051491	positive regulation of filopodium assembly	13.3333	0
GO:0072661	protein targeting to plasma membrane	13.3333	5.71429
GO:0090036	regulation of protein kinase C signaling	13.3333	4.44445
GO:0007193	adenylate cyclase-inhibiting G-protein coupled receptor signaling pathway	13.2275	6.34921
GO:0061337	cardiac conduction	13.1868	4.39561
GO:0007612	learning	13.1677	3.56108
GO:0000279	M phase	13.0719	13.0719
GO:0031114	regulation of microtubule depolymerization	13.0719	9.15033
GO:0050805	negative regulation of synaptic transmission	13.0719	1.30719
GO:0032201	telomere maintenance via semi-conservative replication	12.987	30.303
GO:0051653	spindle localization	12.987	11.2554
GO:0001941	postsynaptic membrane organization	12.8205	0
GO:0007194	negative regulation of adenylate cyclase activity	12.8205	2.5641
GO:0031280	negative regulation of cyclase activity	12.8205	2.5641
GO:0031290	retinal ganglion cell axon guidance	12.8205	2.5641
GO:0032228	regulation of synaptic transmission, GABAergic	12.8205	2.5641
GO:0021954	central nervous system neuron development	12.7551	3.57143
GO:0042551	neuron maturation	12.6316	3.1579
GO:0051784	negative regulation of nuclear division	12.5436	12.7758
GO:0007088	regulation of mitosis	12.5139	13.4765
GO:0007611	learning or memory	12.3103	3.83653
GO:0031112	positive regulation of microtubule polymerization or depolymerization	12.1212	0
GO:0034764	positive regulation of transmembrane transport	12.1212	3.0303
GO:0045687	positive regulation of glial cell differentiation	12.1212	3.0303
GO:0048268	clathrin coat assembly	12.1212	3.0303
GO:0019233	sensory perception of pain	12.0968	6.04839
GO:0007187	G-protein coupled receptor signaling pathway, coupled to cyclic nucleotide second messenger	12.0465	5.3701
GO:0070507	regulation of microtubule cytoskeleton organization	11.9442	9.54236
GO:0014014	negative regulation of gliogenesis	11.8577	7.90514
GO:0021766	hippocampus development	11.7949	7.17949
GO:0003254	regulation of membrane depolarization	11.7647	5.22876
GO:0006833	water transport	11.7647	1.30719
GO:0031113	regulation of microtubule polymerization	11.7647	1.47059
GO:0031281	positive regulation of cyclase activity	11.7647	5.88236
GO:0048483	autonomic nervous system development	11.7647	5.88236
GO:0055021	regulation of cardiac muscle tissue growth	11.7647	7.35295
GO:0045773	positive regulation of axon extension	11.6959	1.16959
GO:0060420	regulation of heart growth	11.6959	8.18714
GO:0030803	negative regulation of cyclic nucleotide biosynthetic process	11.6667	1.66667
GO:0030818	negative regulation of cAMP biosynthetic process	11.6667	1.66667
GO:0035412	regulation of catenin import into nucleus	11.6667	6.66667
GO:0048521	negative regulation of behavior	11.6667	8.33334
GO:0048708	astrocyte differentiation	11.6667	15
GO:0048713	regulation of oligodendrocyte differentiation	11.6667	6.66667
GO:0048704	embryonic skeletal system morphogenesis	11.6402	5.29101
GO:0001764	neuron migration	11.6253	5.10922
GO:0003208	cardiac ventricle morphogenesis	11.5942	9.4203
GO:0031111	negative regulation of microtubule polymerization or depolymerization	11.5942	5.07247
GO:0050922	negative regulation of chemotaxis	11.4286	9.52382
GO:0016358	dendrite development	11.4035	2.50627
GO:0051258	protein polymerization	11.3798	8.25036
GO:0010518	positive regulation of phospholipase activity	11.336	4.5884
GO:0060998	regulation of dendritic spine development	11.2554	4.32901
GO:0048588	developmental cell growth	11.1111	3.70371
GO:0002027	regulation of heart rate	11.0769	12.3077
GO:0007218	neuropeptide signaling pathway	11.0672	7.90514
GO:0032412	regulation of ion transmembrane transporter activity	11.0623	3.42406
GO:0017157	regulation of exocytosis	11.0145	2.12561
GO:0007143	female meiotic division	10.989	10.989
GO:0010882	regulation of cardiac muscle contraction by calcium ion signaling	10.989	4.39561
GO:0043576	regulation of respiratory gaseous exchange	10.989	4.39561
GO:0046320	regulation of fatty acid oxidation	10.989	0
GO:0051350	negative regulation of lyase activity	10.989	2.1978
GO:0000280	nuclear division	10.9207	11.0815
GO:0000132	establishment of mitotic spindle orientation	10.9091	18.1818
GO:0002026	regulation of the force of heart contraction	10.9091	7.27273
GO:0021542	dentate gyrus development	10.9091	0
GO:0032793	positive regulation of CREB transcription factor activity	10.9091	0
GO:0044065	regulation of respiratory system process	10.9091	0
GO:0050879	multicellular organismal movement	10.9091	3.63637
GO:0050881	musculoskeletal movement	10.9091	3.63637
GO:0051783	regulation of nuclear division	10.9008	11.245
GO:0050773	regulation of dendrite development	10.8893	3.26679
GO:0033260	nuclear cell cycle DNA replication	10.8696	25.3623
GO:0044786	cell cycle DNA replication	10.8696	25.3623
GO:0006096	glycolytic process	10.8262	22.792
GO:0010517	regulation of phospholipase activity	10.7822	4.01692
GO:1902578	single-organism localization	10.7662	18.7107
GO:1902580	single-organism cellular localization	10.7662	18.7107
GO:0006336	DNA replication-independent nucleosome assembly	10.7527	13.7634
GO:0034724	DNA replication-independent nucleosome organization	10.7527	13.7634
GO:0050890	cognition	10.6831	3.48837
GO:0033762	response to glucagon	10.6061	3.40909
GO:0010976	positive regulation of neuron projection development	10.5951	2.75762
GO:0050804	regulation of synaptic transmission	10.5948	2.27612
GO:0035725	sodium ion transmembrane transport	10.5747	3.67816
GO:0051017	actin filament bundle assembly	10.5747	3.21839
GO:0061572	actin filament bundle organization	10.5747	3.21839
GO:0021761	limbic system development	10.5458	7.58557
GO:0001578	microtubule bundle formation	10.5263	7.36843
GO:0051785	positive regulation of nuclear division	10.5263	10.5263
GO:0055117	regulation of cardiac muscle contraction	10.4839	4.83871
GO:0022411	cellular component disassembly	10.4756	21.4187
GO:0014015	positive regulation of gliogenesis	10.4575	5.22876
GO:0030809	negative regulation of nucleotide biosynthetic process	10.4575	2.61438
GO:0044089	positive regulation of cellular component biogenesis	10.4575	1.30719
GO:0051349	positive regulation of lyase activity	10.4575	5.22876
GO:1900372	negative regulation of purine nucleotide biosynthetic process	10.4575	2.61438
GO:0022898	regulation of transmembrane transporter activity	10.4348	3.56108
GO:0010881	regulation of cardiac muscle contraction by regulation of the release of sequestered calcium ion	10.2564	5.12821
GO:0010922	positive regulation of phosphatase activity	10.2564	17.9487
GO:0016486	peptide hormone processing	10.2564	7.69231
GO:0043954	cellular component maintenance	10.2564	2.5641
GO:0045168	cell-cell signaling involved in cell fate commitment	10.2564	23.0769
GO:0032409	regulation of transporter activity	10.1754	3.22807
GO:0008306	associative learning	10.1587	3.80953
GO:0061178	regulation of insulin secretion involved in cellular response to glucose stimulus	10.1449	3.62319
GO:0031279	regulation of cyclase activity	10.1149	4.13793
GO:0045685	regulation of glial cell differentiation	10.1149	5.97702
GO:0000722	telomere maintenance via recombination	10	23.3333
GO:0010977	negative regulation of neuron projection development	9.84616	1.84615
GO:0006836	neurotransmitter transport	9.79022	2.98368
GO:0048638	regulation of developmental growth	9.79022	3.19681
GO:0042391	regulation of membrane potential	9.77592	3.36135
GO:0048285	organelle fission	9.71993	9.8867
GO:0000083	regulation of transcription involved in G1/S transition of mitotic cell cycle	9.52382	11.2554
GO:0019933	cAMP-mediated signaling	9.52382	1.90476
GO:0021983	pituitary gland development	9.52382	15.2381
GO:0032288	myelin assembly	9.52382	1.90476
GO:0060043	regulation of cardiac muscle cell proliferation	9.52382	7.61905
GO:0071398	cellular response to fatty acid	9.52382	3.80953
GO:0048814	regulation of dendrite morphogenesis	9.48719	1.53846
GO:0070588	calcium ion transmembrane transport	9.48053	1.68831
GO:0042044	fluid transport	9.47369	1.05263
GO:0055024	regulation of cardiac muscle tissue development	9.47369	5.26316
GO:0072594	establishment of protein localization to organelle	9.44759	20.865
GO:0006942	regulation of striated muscle contraction	9.41177	4.70589
GO:0032886	regulation of microtubule-based process	9.38597	7.63158
GO:0010975	regulation of neuron projection development	9.36787	2.6288
GO:0021799	cerebral cortex radially oriented cell migration	9.35673	4.67837
GO:0060560	developmental growth involved in morphogenesis	9.35375	4.08164
GO:0008542	visual learning	9.33334	3.33334
GO:0031623	receptor internalization	9.33334	2.66667
GO:0050770	regulation of axonogenesis	9.30233	2.83347
GO:0060193	positive regulation of lipase activity	9.30233	3.76523
GO:0048168	regulation of neuronal synaptic plasticity	9.2742	0.806452
GO:0030800	negative regulation of cyclic nucleotide metabolic process	9.15033	1.30719
GO:0030815	negative regulation of cAMP metabolic process	9.15033	1.30719
GO:0023061	signal release	9.09091	3.7594
GO:0031670	cellular response to nutrient	9.09091	3.0303
GO:0050433	regulation of catecholamine secretion	9.09091	3.0303
GO:0050651	dermatan sulfate proteoglycan biosynthetic process	9.09091	6.06061
GO:0050655	dermatan sulfate proteoglycan metabolic process	9.09091	6.06061
GO:2001222	regulation of neuron migration	9.09091	0
GO:0045665	negative regulation of neuron differentiation	9.00901	10.2102
GO:0000076	DNA replication checkpoint	8.88889	17.7778
GO:0000301	retrograde transport, vesicle recycling within Golgi	8.88889	0
GO:0045923	positive regulation of fatty acid metabolic process	8.88889	0
GO:0046068	cGMP metabolic process	8.88889	0
GO:0046885	regulation of hormone biosynthetic process	8.88889	0
GO:0072207	metanephric epithelium development	8.88889	13.3333
GO:0072600	establishment of protein localization to Golgi	8.88889	0
GO:0080182	histone H3-K4 trimethylation	8.88889	0
GO:0090279	regulation of calcium ion import	8.88889	4.44445
GO:0014033	neural crest cell differentiation	8.87097	6.85484
GO:0051339	regulation of lyase activity	8.87097	3.62903
GO:0010880	regulation of release of sequestered calcium ion into cytosol by sarcoplasmic reticulum	8.82353	7.35295
GO:0045762	positive regulation of adenylate cyclase activity	8.79121	6.59341
GO:0090313	regulation of protein targeting to membrane	8.79121	6.59341
GO:0007613	memory	8.71795	2.30769
GO:0050885	neuromuscular process controlling balance	8.70871	2.1021
GO:0035176	social behavior	8.66667	0.666667
GO:0051703	intraspecies interaction between organisms	8.66667	0.666667
GO:0043502	regulation of muscle adaptation	8.65801	6.92641
GO:0048640	negative regulation of developmental growth	8.65801	1.7316
GO:0034453	microtubule anchoring	8.61539	8
GO:0051302	regulation of cell division	8.59199	8.05756
GO:0034765	regulation of ion transmembrane transport	8.58413	2.84445
GO:0022029	telencephalon cell migration	8.57143	3.49207
GO:0002028	regulation of sodium ion transport	8.54701	2.849
GO:0045761	regulation of adenylate cyclase activity	8.54701	4.55841
GO:1901019	regulation of calcium ion transmembrane transporter activity	8.54701	3.41881
GO:0032465	regulation of cytokinesis	8.46775	5.64516
GO:0043271	negative regulation of ion transport	8.46561	4.76191
GO:0044708	single-organism behavior	8.45279	3.00478
GO:0007586	digestion	8.42106	6.31579
GO:0007632	visual behavior	8.37439	2.95567
GO:0022403	cell cycle phase	8.36708	7.82727
GO:0051962	positive regulation of nervous system development	8.33334	1.66667
GO:0051965	positive regulation of synapse assembly	8.33334	1.66667
GO:0001505	regulation of neurotransmitter levels	8.28974	2.65594
GO:0050795	regulation of behavior	8.19876	3.64389
GO:0021953	central nervous system neuron differentiation	8.19407	3.73765
GO:0001702	gastrulation with mouth forming second	8.18714	1.16959
GO:0000226	microtubule cytoskeleton organization	8.16871	6.72242
GO:0031344	regulation of cell projection organization	8.13131	2.32425
GO:0006312	mitotic recombination	8.06452	18.1452
GO:0008088	axon cargo transport	8.06452	2.41936
GO:0034762	regulation of transmembrane transport	8.06202	2.88611
GO:0031345	negative regulation of cell projection organization	8.04829	2.25352
GO:0045664	regulation of neuron differentiation	8.00511	2.84446
GO:0008037	cell recognition	7.99397	2.5641
GO:0070661	leukocyte proliferation	7.97721	1.1396
GO:0050772	positive regulation of axonogenesis	7.96587	2.56046
GO:0060314	regulation of ryanodine-sensitive calcium-release channel activity	7.84314	5.22876
GO:0032312	regulation of ARF GTPase activity	7.79221	0.865801
GO:0006323	DNA packaging	7.78636	9.36294
GO:0014013	regulation of gliogenesis	7.75194	4.42968
GO:0008016	regulation of heart contraction	7.72079	5.81703
GO:0010611	regulation of cardiac muscle hypertrophy	7.69231	5.12821
GO:0010656	negative regulation of muscle cell apoptotic process	7.69231	7.69231
GO:0014743	regulation of muscle hypertrophy	7.69231	5.12821
GO:0021801	cerebral cortex radial glia guided migration	7.69231	2.5641
GO:0051294	establishment of spindle orientation	7.69231	12.8205
GO:0060291	long-term synaptic potentiation	7.69231	0
GO:0061298	retina vasculature development in camera-type eye	7.69231	7.69231
GO:0021879	forebrain neuron differentiation	7.66129	4.43549
GO:0010469	regulation of receptor activity	7.62412	1.59575
GO:0007616	long-term memory	7.61905	3.80953
GO:0017156	calcium ion-dependent exocytosis	7.61905	1.90476
GO:0021545	cranial nerve development	7.61905	11.4286
GO:0031018	endocrine pancreas development	7.61905	7.61905
GO:0042133	neurotransmitter metabolic process	7.61905	5.71429
GO:0043114	regulation of vascular permeability	7.61905	0
GO:0060428	lung epithelium development	7.61905	3.80953
GO:0072376	protein activation cascade	7.61905	17.1429
GO:0008361	regulation of cell size	7.50792	2.62325
GO:0031145	anaphase-promoting complex-dependent proteasomal ubiquitin-dependent protein catabolic process	7.4955	14.1982
GO:0006605	protein targeting	7.47645	16.8576
GO:0048667	cell morphogenesis involved in neuron differentiation	7.44914	3.29964
GO:0061564	axon development	7.43696	3.24962
GO:0006412	translation	7.39804	16.4437
GO:0090257	regulation of muscle system process	7.37489	4.03863
GO:0002690	positive regulation of leukocyte chemotaxis	7.36843	3.1579
GO:0019935	cyclic-nucleotide-mediated signaling	7.36843	2.10526
GO:0046058	cAMP metabolic process	7.36843	1.05263
GO:0051145	smooth muscle cell differentiation	7.36843	7.36843
GO:0042026	protein refolding	7.35295	8.82353
GO:0048812	neuron projection morphogenesis	7.30785	3.02122
GO:0030534	adult behavior	7.30338	2.45148
GO:0043242	negative regulation of protein complex disassembly	7.30159	3.49207
GO:1901880	negative regulation of protein depolymerization	7.30159	3.49207
GO:0021885	forebrain cell migration	7.28745	2.96896
GO:0001974	blood vessel remodeling	7.27273	3.63637
GO:0002089	lens morphogenesis in camera-type eye	7.27273	3.63637
GO:0006911	phagocytosis, engulfment	7.27273	7.27273
GO:0006956	complement activation	7.27273	25.4546
GO:0007063	regulation of sister chromatid cohesion	7.27273	7.27273
GO:0021884	forebrain neuron development	7.27273	0
GO:0035307	positive regulation of protein dephosphorylation	7.27273	7.27273
GO:0035909	aorta morphogenesis	7.27273	3.63637
GO:0045124	regulation of bone resorption	7.27273	7.27273
GO:0045620	negative regulation of lymphocyte differentiation	7.27273	3.63637
GO:0060445	branching involved in salivary gland morphogenesis	7.27273	3.63637
GO:0090314	positive regulation of protein targeting to membrane	7.27273	7.27273
GO:1901020	negative regulation of calcium ion transmembrane transporter activity	7.27273	10.9091
GO:1901021	positive regulation of calcium ion transmembrane transporter activity	7.27273	3.63637
GO:2001258	negative regulation of cation channel activity	7.27273	10.9091
GO:0000910	cytokinesis	7.25941	6.52681
GO:0007098	centrosome cycle	7.25807	5.24194
GO:0048706	embryonic skeletal system development	7.18816	4.01692
GO:0042552	myelination	7.13034	2.68849
GO:0007409	axonogenesis	7.1045	3.18491
GO:0060191	regulation of lipase activity	7.10383	2.84153
GO:0007268	synaptic transmission	7.03177	2.52528
GO:0070849	response to epidermal growth factor	7.01755	5.84796
GO:1903046	meiotic cell cycle process	7.01755	5.80763
GO:0051301	cell division	7.01371	6.8457
GO:0050920	regulation of chemotaxis	7.00337	2.6936
GO:0003231	cardiac ventricle development	6.97675	7.39958
GO:0030802	regulation of cyclic nucleotide biosynthetic process	6.95653	3.47826
GO:0031346	positive regulation of cell projection organization	6.9492	2.23286
GO:0007610	behavior	6.93782	2.58179
GO:0051325	interphase	6.92641	5.19481
GO:0051329	mitotic interphase	6.92641	5.19481
GO:1900543	negative regulation of purine nucleotide metabolic process	6.92641	1.7316
GO:0007411	axon guidance	6.91544	3.19318
GO:0097485	neuron projection guidance	6.91544	3.19318
GO:0030808	regulation of nucleotide biosynthetic process	6.9149	3.5461
GO:1900371	regulation of purine nucleotide biosynthetic process	6.9149	3.5461
GO:0008344	adult locomotory behavior	6.89656	2.17786
GO:0007272	ensheathment of neurons	6.89266	2.59887
GO:0008366	axon ensheathment	6.89266	2.59887
GO:0070167	regulation of biomineral tissue development	6.87831	2.1164
GO:0010389	regulation of G2/M transition of mitotic cell cycle	6.83761	6.26781
GO:0048520	positive regulation of behavior	6.82927	2.92683
GO:0006937	regulation of muscle contraction	6.82148	4.49928
GO:0007017	microtubule-based process	6.81161	5.65356
GO:0051781	positive regulation of cell division	6.77362	4.99109
GO:0031175	neuron projection development	6.71243	2.75803
GO:0048489	synaptic vesicle transport	6.7086	1.95667
GO:0097480	establishment of synaptic vesicle localization	6.7086	1.95667
GO:0050877	neurological system process	6.6951	2.26013
GO:0051048	negative regulation of secretion	6.69388	2.28572
GO:0007422	peripheral nervous system development	6.66667	3.80953
GO:0030501	positive regulation of bone mineralization	6.66667	3.33334
GO:0032413	negative regulation of ion transmembrane transporter activity	6.66667	5
GO:0034109	homotypic cell-cell adhesion	6.66667	3.33334
GO:0042255	ribosome assembly	6.66667	25
GO:0046605	regulation of centrosome cycle	6.66667	7.61905
GO:0048013	ephrin receptor signaling pathway	6.66667	3.33334
GO:0061001	regulation of dendritic spine morphogenesis	6.66667	0
GO:0061098	positive regulation of protein tyrosine kinase activity	6.66667	0
GO:0070169	positive regulation of biomineral tissue development	6.66667	3.33334
GO:0043044	ATP-dependent chromatin remodeling	6.6605	6.6605
GO:0097479	synaptic vesicle localization	6.62338	1.81818
GO:0000578	embryonic axis specification	6.59341	4.39561
GO:0002275	myeloid cell activation involved in immune response	6.59341	13.1868
GO:0003401	axis elongation	6.59341	2.1978
GO:0015701	bicarbonate transport	6.59341	8.79121
GO:0030279	negative regulation of ossification	6.59341	2.1978
GO:0030325	adrenal gland development	6.59341	8.79121
GO:0030866	cortical actin cytoskeleton organization	6.59341	0
GO:0042744	hydrogen peroxide catabolic process	6.59341	21.978
GO:0046850	regulation of bone remodeling	6.59341	6.59341
GO:0051647	nucleus localization	6.59341	4.39561
GO:0071364	cellular response to epidermal growth factor stimulus	6.59341	4.39561
GO:0051225	spindle assembly	6.58537	4.87805
GO:0003206	cardiac chamber morphogenesis	6.57005	5.60387
GO:0001755	neural crest cell migration	6.53595	3.92157
GO:0060048	cardiac muscle contraction	6.53595	2.61438
GO:0060563	neuroepithelial cell differentiation	6.53595	2.61438
GO:0071526	semaphorin-plexin signaling pathway	6.53595	3.92157
GO:0072080	nephron tubule development	6.53595	6.53595
GO:0032943	mononuclear cell proliferation	6.52174	0.724638
GO:0046651	lymphocyte proliferation	6.52174	0.724638
GO:0050767	regulation of neurogenesis	6.47464	2.47235
GO:0007126	meiotic nuclear division	6.45691	5.80028
GO:0018107	peptidyl-threonine phosphorylation	6.45162	1.20968
GO:0072073	kidney epithelium development	6.40394	4.4335
GO:0021700	developmental maturation	6.39635	2.62707
GO:0010769	regulation of cell morphogenesis involved in differentiation	6.36793	1.98113
GO:0051297	centrosome organization	6.36364	5.58442
GO:0021988	olfactory lobe development	6.34921	4.23281
GO:1902749	regulation of cell cycle G2/M phase transition	6.34921	6.34921
GO:0006835	dicarboxylic acid transport	6.34147	2.92683
GO:0000904	cell morphogenesis involved in differentiation	6.32366	2.85799
GO:0021537	telencephalon development	6.32219	3.70821
GO:0048666	neuron development	6.31935	2.75185
GO:0045778	positive regulation of ossification	6.31579	2.10526
GO:0050771	negative regulation of axonogenesis	6.30631	1.2012
GO:0051960	regulation of nervous system development	6.29718	2.31846
GO:0014032	neural crest cell development	6.26781	5.69801
GO:0021772	olfactory bulb development	6.26781	4.55841
GO:0010001	glial cell differentiation	6.17103	4.58419
GO:0003205	cardiac chamber development	6.1706	6.41259
GO:0035690	cellular response to drug	6.15385	4.30769
GO:0072659	protein localization to plasma membrane	6.1039	2.5974
GO:0021543	pallium development	6.09966	3.78007
GO:0007186	G-protein coupled receptor signaling pathway	6.09823	2.84715
GO:0001656	metanephros development	6.06061	5.30303
GO:0007190	activation of adenylate cyclase activity	6.06061	9.09091
GO:0016237	microautophagy	6.06061	12.1212
GO:0021535	cell migration in hindbrain	6.06061	3.0303
GO:0021871	forebrain regionalization	6.06061	6.06061
GO:0031103	axon regeneration	6.06061	9.09091
GO:0031128	developmental induction	6.06061	15.1515
GO:0032012	regulation of ARF protein signal transduction	6.06061	0.757576
GO:0032350	regulation of hormone metabolic process	6.06061	0
GO:0033151	V(D)J recombination	6.06061	12.1212
GO:0034727	piecemeal microautophagy of nucleus	6.06061	12.1212
GO:0035306	positive regulation of dephosphorylation	6.06061	6.06061
GO:0035904	aorta development	6.06061	3.0303
GO:0044804	nucleophagy	6.06061	12.1212
GO:0044805	late nucleophagy	6.06061	12.1212
GO:0048488	synaptic vesicle endocytosis	6.06061	2.5974
GO:0050994	regulation of lipid catabolic process	6.06061	0.865801
GO:0055012	ventricular cardiac muscle cell differentiation	6.06061	6.06061
GO:0060487	lung epithelial cell differentiation	6.06061	6.06061
GO:0061333	renal tubule morphogenesis	6.06061	9.09091
GO:1902175	regulation of intrinsic apoptotic signaling pathway in response to oxidative stress	6.06061	6.06061
GO:1902534	single-organism membrane invagination	6.06061	12.1212
GO:2000351	regulation of endothelial cell apoptotic process	6.06061	0
GO:0018210	peptidyl-threonine modification	6.05042	1.0084
GO:0032272	negative regulation of protein polymerization	6.05042	7.05883
GO:2001257	regulation of cation channel activity	6.04839	2.01613
GO:2000021	regulation of ion homeostasis	6.04199	2.86739
GO:0061041	regulation of wound healing	6.03175	6.34921
GO:0016337	single organismal cell-cell adhesion	6.02391	2.48409
GO:0019722	calcium-mediated signaling	6.00601	1.8018
GO:0043269	regulation of ion transport	5.98937	2.33137
GO:0019932	second-messenger-mediated signaling	5.97015	2.35188
GO:0060485	mesenchyme development	5.96154	4.90385
GO:0000079	regulation of cyclin-dependent protein serine/threonine kinase activity	5.95238	5.85318
GO:0016049	cell growth	5.92862	2.41984
GO:0021795	cerebral cortex cell migration	5.91133	3.94089
GO:0048663	neuron fate commitment	5.91133	6.89656
GO:0030817	regulation of cAMP biosynthetic process	5.89744	3.33334
GO:0045666	positive regulation of neuron differentiation	5.89744	4.35898
GO:0006301	postreplication repair	5.88236	10.2941
GO:0018023	peptidyl-lysine trimethylation	5.88236	0
GO:0030850	prostate gland development	5.88236	0
GO:0048599	oocyte development	5.88236	7.35295
GO:0051693	actin filament capping	5.88236	1.47059
GO:0060675	ureteric bud morphogenesis	5.88236	8.82353
GO:0007626	locomotory behavior	5.85586	2.12355
GO:0050806	positive regulation of synaptic transmission	5.82011	1.0582
GO:0044057	regulation of system process	5.81109	2.8366
GO:0021872	forebrain generation of neurons	5.8072	6.27178
GO:0045980	negative regulation of nucleotide metabolic process	5.7971	1.44928
GO:0030182	neuron differentiation	5.76461	2.73161
GO:0031023	microtubule organizing center organization	5.76272	4.97175
GO:0001975	response to amphetamine	5.71429	13.3333
GO:0006206	pyrimidine nucleobase metabolic process	5.71429	4.76191
GO:0009593	detection of chemical stimulus	5.71429	9.52382
GO:0009948	anterior/posterior axis specification	5.71429	2.85714
GO:0022011	myelination in peripheral nervous system	5.71429	3.80953
GO:0030514	negative regulation of BMP signaling pathway	5.71429	3.80953
GO:0030865	cortical cytoskeleton organization	5.71429	0
GO:0032292	peripheral nervous system axon ensheathment	5.71429	3.80953
GO:0043243	positive regulation of protein complex disassembly	5.71429	1.90476
GO:0048596	embryonic camera-type eye morphogenesis	5.71429	0
GO:0051569	regulation of histone H3-K4 methylation	5.71429	1.90476
GO:0051952	regulation of amine transport	5.71429	2.85714
GO:0072529	pyrimidine-containing compound catabolic process	5.71429	3.80953
GO:0090083	regulation of inclusion body assembly	5.71429	9.52382
GO:2001259	positive regulation of cation channel activity	5.71429	1.90476
GO:0050796	regulation of insulin secretion	5.7036	2.99205
GO:0070542	response to fatty acid	5.69801	2.849
GO:0071333	cellular response to glucose stimulus	5.69801	2.2792
GO:0090002	establishment of protein localization to plasma membrane	5.66802	2.69906
GO:0051321	meiotic cell cycle	5.63784	5.16006
GO:0000086	G2/M transition of mitotic cell cycle	5.59425	5.77115
GO:0044839	cell cycle G2/M phase transition	5.59425	5.77115
GO:0045931	positive regulation of mitotic cell cycle	5.5914	3.87097
GO:1903047	mitotic cell cycle process	5.58514	6.10685
GO:0007018	microtubule-based movement	5.57111	4.45156
GO:0043270	positive regulation of ion transport	5.55556	2.87699
GO:0006816	calcium ion transport	5.54124	1.58935
GO:0002062	chondrocyte differentiation	5.53846	1.84615
GO:0030500	regulation of bone mineralization	5.53846	1.84615
GO:0048066	developmental pigmentation	5.53846	3.69231
GO:0002688	regulation of leukocyte chemotaxis	5.5336	2.37154
GO:0003151	outflow tract morphogenesis	5.5336	4.74309
GO:0048278	vesicle docking	5.5336	0.790514
GO:0030810	positive regulation of nucleotide biosynthetic process	5.51724	3.67816
GO:0035019	somatic stem cell maintenance	5.51724	6.89656
GO:1900373	positive regulation of purine nucleotide biosynthetic process	5.51724	3.67816
GO:0006334	nucleosome assembly	5.47369	8.84211
GO:0030799	regulation of cyclic nucleotide metabolic process	5.45074	3.3543
GO:0042063	gliogenesis	5.41994	4.12094
GO:0009187	cyclic nucleotide metabolic process	5.41872	0.985222
GO:0030804	positive regulation of cyclic nucleotide biosynthetic process	5.41872	3.94089
GO:0050921	positive regulation of chemotaxis	5.40541	2.56046
GO:0050905	neuromuscular process	5.38847	1.50376
GO:0006814	sodium ion transport	5.38721	2.42424
GO:0007267	cell-cell signaling	5.35262	2.40868
GO:0010833	telomere maintenance via telomere lengthening	5.3476	12.4777
GO:0006112	energy reserve metabolic process	5.34654	3.52475
GO:0000381	regulation of alternative mRNA splicing, via spliceosome	5.33334	5.33334
GO:0006941	striated muscle contraction	5.33334	2
GO:0046580	negative regulation of Ras protein signal transduction	5.33334	3.33334
GO:0071300	cellular response to retinoic acid	5.33334	3.33334
GO:0048699	generation of neurons	5.32537	2.38741
GO:0048762	mesenchymal cell differentiation	5.32468	5.06494
GO:0071326	cellular response to monosaccharide stimulus	5.29101	2.6455
GO:0071331	cellular response to hexose stimulus	5.29101	2.6455
GO:0006939	smooth muscle contraction	5.26316	3.1579
GO:0007009	plasma membrane organization	5.26316	2.45614
GO:0035272	exocrine system development	5.26316	4.21053
GO:0045921	positive regulation of exocytosis	5.26316	1.05263
GO:0072009	nephron epithelium development	5.26316	7.36843
GO:0046883	regulation of hormone secretion	5.25481	2.78611
GO:0009994	oocyte differentiation	5.22876	6.53595
GO:0034067	protein localization to Golgi apparatus	5.22876	0
GO:0060350	endochondral bone morphogenesis	5.22876	2.61438
GO:0070192	chromosome organization involved in meiosis	5.22876	5.22876
GO:0006935	chemotaxis	5.21729	3.08833
GO:0042330	taxis	5.21729	3.08833
GO:0033365	protein localization to organelle	5.21562	12.0423
GO:0001708	cell fate specification	5.19481	6.92641
GO:0006297	nucleotide-excision repair, DNA gap filling	5.19481	14.7186
GO:0021680	cerebellar Purkinje cell layer development	5.19481	2.5974
GO:0044802	single-organism membrane organization	5.17642	9.26433
GO:0006337	nucleosome disassembly	5.12821	5.12821
GO:0019229	regulation of vasoconstriction	5.12821	7.69231
GO:0030888	regulation of B cell proliferation	5.12821	2.5641
GO:0031498	chromatin disassembly	5.12821	5.12821
GO:0032986	protein-DNA complex disassembly	5.12821	5.12821
GO:0033032	regulation of myeloid cell apoptotic process	5.12821	2.5641
GO:0040020	regulation of meiosis	5.12821	2.5641
GO:0045787	positive regulation of cell cycle	5.12821	4.67381
GO:0045838	positive regulation of membrane potential	5.12821	2.5641
GO:0060479	lung cell differentiation	5.12821	5.12821
GO:0060716	labyrinthine layer blood vessel development	5.12821	5.12821
GO:1902742	apoptotic process involved in development	5.12821	5.12821
GO:0021695	cerebellar cortex development	5.12091	2.56046
GO:0065004	protein-DNA complex assembly	5.11235	7.42115
GO:0051897	positive regulation of protein kinase B signaling	5.10511	2.1021
GO:0000278	mitotic cell cycle	5.08234	5.83701
GO:0003015	heart process	5.07247	3.62319
GO:0051568	histone H3-K4 methylation	5.07247	0.724638
GO:0090276	regulation of peptide hormone secretion	5.07112	2.76232
GO:0050768	negative regulation of neurogenesis	5.0581	2.4607
GO:0022008	neurogenesis	5.0545	2.27475
GO:0035107	appendage morphogenesis	5.04505	3.02703
GO:0035108	limb morphogenesis	5.04505	3.02703
GO:0098609	cell-cell adhesion	5.03497	2.05128
GO:0071103	DNA conformation change	5.03029	6.27253
GO:0031102	neuron projection regeneration	5	6.66667
GO:0048048	embryonic eye morphogenesis	5	0
GO:1900407	regulation of cellular response to oxidative stress	5	8.33334
GO:0060284	regulation of cell development	4.97784	2.17697
GO:0060538	skeletal muscle organ development	4.97092	2.32681
GO:0002791	regulation of peptide secretion	4.9697	2.70707
GO:0051046	regulation of secretion	4.95642	2.44085
GO:0098602	single organism cell adhesion	4.95027	2.08189
GO:0072384	organelle transport along microtubule	4.92611	2.46306
GO:0051928	positive regulation of calcium ion transport	4.92425	2.65152
GO:0051058	negative regulation of small GTPase mediated signal transduction	4.92308	3.07692
GO:0051279	regulation of release of sequestered calcium ion into cytosol	4.92308	4.30769
GO:0070374	positive regulation of ERK1 and ERK2 cascade	4.87805	2.68293
GO:0043112	receptor metabolic process	4.87265	1.99336
GO:0090087	regulation of peptide transport	4.87129	2.81188
GO:0050769	positive regulation of neurogenesis	4.86842	2.54386
GO:0051705	multi-organism behavior	4.86258	1.47992
GO:0061053	somite development	4.8583	1.88934
GO:0030902	hindbrain development	4.84395	2.14732
GO:0060349	bone morphogenesis	4.83871	1.6129
GO:0030814	regulation of cAMP metabolic process	4.83092	3.6715
GO:1901879	regulation of protein depolymerization	4.83092	2.31884
GO:0048858	cell projection morphogenesis	4.80879	2.02695
GO:0003008	system process	4.7629	2.16495
GO:0001837	epithelial to mesenchymal transition	4.76191	4.76191
GO:0003407	neural retina development	4.76191	1.90476
GO:0021549	cerebellum development	4.76191	2.18254
GO:0021846	cell proliferation in forebrain	4.76191	4.76191
GO:0032410	negative regulation of transporter activity	4.76191	2.85714
GO:0045833	negative regulation of lipid metabolic process	4.76191	4.23281
GO:0061326	renal tubule development	4.76191	4.76191
GO:0060047	heart contraction	4.74309	3.16206
GO:0009914	hormone transport	4.73119	6.02151
GO:0030801	positive regulation of cyclic nucleotide metabolic process	4.73119	5.16129
GO:0030326	embryonic limb morphogenesis	4.69946	2.29508
GO:0035113	embryonic appendage morphogenesis	4.69946	2.29508
GO:0030835	negative regulation of actin filament depolymerization	4.67837	1.16959
GO:0014031	mesenchymal cell development	4.67572	4.52489
GO:0002687	positive regulation of leukocyte migration	4.66667	2.66667
GO:0010324	membrane invagination	4.66667	6
GO:0070979	protein K11-linked ubiquitination	4.66667	3.33334
GO:1902115	regulation of organelle assembly	4.66667	1.33333
GO:0035282	segmentation	4.64576	3.01975
GO:0030900	forebrain development	4.63913	3.42459
GO:0071248	cellular response to metal ion	4.63768	3.09179
GO:0033273	response to vitamin	4.63458	3.92157
GO:0070838	divalent metal ion transport	4.60367	1.31533
GO:0002274	myeloid leukocyte activation	4.5977	7.8161
GO:0021782	glial cell development	4.59184	3.7415
GO:0048736	appendage development	4.5679	2.77778
GO:0060173	limb development	4.5679	2.77778
GO:0032990	cell part morphogenesis	4.56165	1.97666
GO:0032411	positive regulation of transporter activity	4.55841	2.2792
GO:0001756	somitogenesis	4.54546	2.65152
GO:0045981	positive regulation of nucleotide metabolic process	4.54546	4.54546
GO:1900544	positive regulation of purine nucleotide metabolic process	4.54546	4.54546
GO:0060491	regulation of cell projection assembly	4.52489	1.35747
GO:0031497	chromatin assembly	4.48701	7.60602
GO:0010959	regulation of metal ion transport	4.48522	2.1067
GO:0007519	skeletal muscle tissue development	4.47671	2.29885
GO:0072511	divalent inorganic cation transport	4.47039	1.30109
GO:0001909	leukocyte mediated cytotoxicity	4.44445	8.88889
GO:0001914	regulation of T cell mediated cytotoxicity	4.44445	4.44445
GO:0006198	cAMP catabolic process	4.44445	0
GO:0006335	DNA replication-dependent nucleosome assembly	4.44445	0
GO:0006995	cellular response to nitrogen starvation	4.44445	8.88889
GO:0007016	cytoskeletal anchoring at plasma membrane	4.44445	4.44445
GO:0007289	spermatid nucleus differentiation	4.44445	0
GO:0009084	glutamine family amino acid biosynthetic process	4.44445	4.44445
GO:0009110	vitamin biosynthetic process	4.44445	4.44445
GO:0021756	striatum development	4.44445	0
GO:0021781	glial cell fate commitment	4.44445	4.44445
GO:0021904	dorsal/ventral neural tube patterning	4.44445	4.44445
GO:0030212	hyaluronan metabolic process	4.44445	0
GO:0030224	monocyte differentiation	4.44445	0
GO:0031069	hair follicle morphogenesis	4.44445	4.44445
GO:0032770	positive regulation of monooxygenase activity	4.44445	4.44445
GO:0034723	DNA replication-dependent nucleosome organization	4.44445	0
GO:0043090	amino acid import	4.44445	4.44445
GO:0043299	leukocyte degranulation	4.44445	4.44445
GO:0043562	cellular response to nitrogen levels	4.44445	8.88889
GO:0043649	dicarboxylic acid catabolic process	4.44445	4.44445
GO:0045652	regulation of megakaryocyte differentiation	4.44445	8.88889
GO:0045823	positive regulation of heart contraction	4.44445	8.88889
GO:0045880	positive regulation of smoothened signaling pathway	4.44445	4.44445
GO:0046688	response to copper ion	4.44445	8.88889
GO:0050886	endocrine process	4.44445	0
GO:0051354	negative regulation of oxidoreductase activity	4.44445	4.44445
GO:0051654	establishment of mitochondrion localization	4.44445	0
GO:0051782	negative regulation of cell division	4.44445	17.7778
GO:0070265	necrotic cell death	4.44445	4.44445
GO:0070935	3'-UTR-mediated mRNA stabilization	4.44445	0
GO:0072088	nephron epithelium morphogenesis	4.44445	17.7778
GO:0072148	epithelial cell fate commitment	4.44445	17.7778
GO:0072273	metanephric nephron morphogenesis	4.44445	17.7778
GO:0090312	positive regulation of protein deacetylation	4.44445	4.44445
GO:1901016	regulation of potassium ion transmembrane transporter activity	4.44445	0
GO:1901881	positive regulation of protein depolymerization	4.44445	0
GO:1902043	positive regulation of extrinsic apoptotic signaling pathway via death domain receptors	4.44445	4.44445
GO:2000191	regulation of fatty acid transport	4.44445	4.44445
GO:2000826	regulation of heart morphogenesis	4.44445	13.3333
GO:0007043	cell-cell junction assembly	4.43975	0.422833
GO:0022612	gland morphogenesis	4.43975	2.74842
GO:0001678	cellular glucose homeostasis	4.43549	2.01613
GO:0072089	stem cell proliferation	4.43549	4.03226
GO:0046834	lipid phosphorylation	4.4335	0.985222
GO:0002763	positive regulation of myeloid leukocyte differentiation	4.41177	0
GO:0014902	myotube differentiation	4.41177	1.47059
GO:0016578	histone deubiquitination	4.41177	0
GO:0022409	positive regulation of cell-cell adhesion	4.41177	5.88236
GO:0060402	calcium ion transport into cytosol	4.41177	0
GO:0003170	heart valve development	4.39561	6.59341
GO:0003179	heart valve morphogenesis	4.39561	6.59341
GO:0007435	salivary gland morphogenesis	4.39561	4.39561
GO:0008105	asymmetric protein localization	4.39561	4.39561
GO:0019748	secondary metabolic process	4.39561	0
GO:0021544	subpallium development	4.39561	2.1978
GO:0022600	digestive system process	4.39561	0
GO:0030041	actin filament polymerization	4.39561	0
GO:0031663	lipopolysaccharide-mediated signaling pathway	4.39561	2.1978
GO:0033628	regulation of cell adhesion mediated by integrin	4.39561	4.39561
GO:0035304	regulation of protein dephosphorylation	4.39561	17.5824
GO:0046579	positive regulation of Ras protein signal transduction	4.39561	2.1978
GO:0047496	vesicle transport along microtubule	4.39561	0
GO:0060397	JAK-STAT cascade involved in growth hormone signaling pathway	4.39561	4.39561
GO:2000273	positive regulation of receptor activity	4.39561	0
GO:0006261	DNA-dependent DNA replication	4.39458	9.20992
GO:0019886	antigen processing and presentation of exogenous peptide antigen via MHC class II	4.38185	4.4601
GO:0070936	protein K48-linked ubiquitination	4.36975	2.01681
GO:0072006	nephron development	4.35898	3.58975
GO:0002011	morphogenesis of an epithelial sheet	4.34783	0
GO:0046854	phosphatidylinositol phosphorylation	4.34783	0.724638
GO:0022037	metencephalon development	4.34608	1.85111
GO:0051924	regulation of calcium ion transport	4.34608	2.41449
GO:0022604	regulation of cell morphogenesis	4.33821	1.80232
GO:0040011	locomotion	4.33399	2.5823
GO:0008217	regulation of blood pressure	4.33264	2.51572
GO:0032835	glomerulus development	4.32901	2.5974
GO:0022610	biological adhesion	4.31099	2.13316
GO:0050680	negative regulation of epithelial cell proliferation	4.30977	2.82828
GO:0010721	negative regulation of cell development	4.30108	2.10379
GO:0007155	cell adhesion	4.28894	2.1164
GO:0048709	oligodendrocyte differentiation	4.26743	2.56046
GO:0050954	sensory perception of mechanical stimulus	4.26588	1.88492
GO:0061351	neural precursor cell proliferation	4.25121	4.63768
GO:0051656	establishment of organelle localization	4.24317	2.78798
GO:0000902	cell morphogenesis	4.2231	1.94352
GO:0002053	positive regulation of mesenchymal cell proliferation	4.21053	5.26316
GO:0006904	vesicle docking involved in exocytosis	4.21053	1.05263
GO:0043266	regulation of potassium ion transport	4.21053	2.10526
GO:0045428	regulation of nitric oxide biosynthetic process	4.21053	8.42106
GO:0048169	regulation of long-term neuronal synaptic plasticity	4.21053	2.10526
GO:0071897	DNA biosynthetic process	4.21053	9.47369
GO:0007173	epidermal growth factor receptor signaling pathway	4.17462	1.81798
GO:0038127	ERBB signaling pathway	4.17462	1.81798
GO:0002495	antigen processing and presentation of peptide antigen via MHC class II	4.14661	4.22066
GO:0002504	antigen processing and presentation of peptide or polysaccharide antigen via MHC class II	4.14661	4.22066
GO:2000648	positive regulation of stem cell proliferation	4.12699	4.44445
GO:0030030	cell projection organization	4.12309	1.77739
GO:0051439	regulation of ubiquitin-protein ligase activity involved in mitotic cell cycle	4.10959	11.4155
GO:0071824	protein-DNA complex subunit organization	4.08518	5.85253
GO:0007156	homophilic cell adhesion	4.06386	1.30624
GO:0002695	negative regulation of leukocyte activation	4.04859	1.61943
GO:0048469	cell maturation	4.04372	2.62295
GO:0071322	cellular response to carbohydrate stimulus	4.03362	2.68908
GO:0034728	nucleosome organization	4.03136	6.40538
GO:0032844	regulation of homeostatic process	4.03129	2.53165
GO:0048468	cell development	4.02345	1.91557
GO:0006928	cellular component movement	4.021	2.46135
GO:0007528	neuromuscular junction development	4	1.33333
GO:0050864	regulation of B cell activation	4	2
GO:0035270	endocrine system development	3.98671	5.75859
GO:1990267	response to transition metal nanoparticle	3.98293	3.69844
GO:0010921	regulation of phosphatase activity	3.96826	1.68651
GO:0007420	brain development	3.96252	2.56058
GO:0048589	developmental growth	3.95802	1.91904
GO:0010464	regulation of mesenchymal cell proliferation	3.95257	3.95257
GO:0014075	response to amine	3.95257	8.69566
GO:0032414	positive regulation of ion transmembrane transporter activity	3.95257	0.790514
GO:0043491	protein kinase B signaling	3.95257	1.58103
GO:0043666	regulation of phosphoprotein phosphatase activity	3.95257	3.16206
GO:0006094	gluconeogenesis	3.94089	9.85222
GO:0022406	membrane docking	3.94089	0.985222
GO:0030510	regulation of BMP signaling pathway	3.94089	3.94089
GO:0009612	response to mechanical stimulus	3.93981	2.62654
GO:0006298	mismatch repair	3.92157	7.84314
GO:0007205	protein kinase C-activating G-protein coupled receptor signaling pathway	3.92157	2.61438
GO:0014044	Schwann cell development	3.92157	2.61438
GO:0030858	positive regulation of epithelial cell differentiation	3.92157	2.61438
GO:0031076	embryonic camera-type eye development	3.92157	0
GO:0031122	cytoplasmic microtubule organization	3.92157	2.61438
GO:0034103	regulation of tissue remodeling	3.92157	5.22876
GO:0042743	hydrogen peroxide metabolic process	3.92157	26.1438
GO:0045103	intermediate filament-based process	3.92157	2.61438
GO:0045104	intermediate filament cytoskeleton organization	3.92157	2.61438
GO:0051646	mitochondrion localization	3.92157	1.30719
GO:0055123	digestive system development	3.92157	1.35747
GO:0060401	cytosolic calcium ion transport	3.92157	0
GO:0060412	ventricular septum morphogenesis	3.92157	5.22876
GO:0060993	kidney morphogenesis	3.92157	5.22876
GO:0071241	cellular response to inorganic substance	3.92157	2.98039
GO:0007417	central nervous system development	3.92146	2.445
GO:0048870	cell motility	3.91872	2.67237
GO:0051674	localization of cell	3.91872	2.67237
GO:0032508	DNA duplex unwinding	3.91157	5.27211
GO:0046620	regulation of organ growth	3.90391	3.30331
GO:0048565	digestive tract development	3.90071	1.59575
GO:0008015	blood circulation	3.89318	2.09138
GO:0051494	negative regulation of cytoskeleton organization	3.89145	2.76498
GO:0016477	cell migration	3.86678	2.74324
GO:0048705	skeletal system morphogenesis	3.86281	1.8648
GO:0021510	spinal cord development	3.83839	2.82828
GO:0007015	actin filament organization	3.83044	1.63432
GO:0061024	membrane organization	3.82946	7.79732
GO:0051592	response to calcium ion	3.82514	2.51366
GO:0003013	circulatory system process	3.82428	2.05436
GO:0002931	response to ischemia	3.80953	3.80953
GO:0006623	protein targeting to vacuole	3.80953	7.61905
GO:0007431	salivary gland development	3.80953	3.80953
GO:0008333	endosome to lysosome transport	3.80953	0.952382
GO:0010676	positive regulation of cellular carbohydrate metabolic process	3.80953	0.952382
GO:0019068	virion assembly	3.80953	19.0476
GO:0032856	activation of Ras GTPase activity	3.80953	0
GO:0045429	positive regulation of nitric oxide biosynthetic process	3.80953	7.61905
GO:0048701	embryonic cranial skeleton morphogenesis	3.80953	3.80953
GO:0050918	positive chemotaxis	3.80953	3.80953
GO:0051445	regulation of meiotic cell cycle	3.80953	1.90476
GO:0060425	lung morphogenesis	3.80953	1.90476
GO:0072666	establishment of protein localization to vacuole	3.80953	7.61905
GO:2000677	regulation of transcription regulatory region DNA binding	3.80953	1.90476
GO:0051640	organelle localization	3.80902	2.50687
GO:0032989	cellular component morphogenesis	3.80344	1.83919
GO:0010522	regulation of calcium ion transport into cytosol	3.78788	3.40909
GO:0030204	chondroitin sulfate metabolic process	3.77868	1.61943
GO:0050654	chondroitin sulfate proteoglycan metabolic process	3.77868	1.61943
GO:0051101	regulation of DNA binding	3.77359	5.95066
GO:0022402	cell cycle process	3.76355	4.09693
GO:0032392	DNA geometric change	3.7551	5.06123
GO:0051493	regulation of cytoskeleton organization	3.74836	2.90594
GO:0030705	cytoskeleton-dependent intracellular transport	3.74775	2.5946
GO:0032535	regulation of cellular component size	3.72961	2.4087
GO:0061371	determination of heart left/right asymmetry	3.70371	0.529101
GO:0002065	columnar/cuboidal epithelial cell differentiation	3.69748	2.35294
GO:0018022	peptidyl-lysine methylation	3.69231	0
GO:0044273	sulfur compound catabolic process	3.69231	2.46154
GO:0031572	G2 DNA damage checkpoint	3.67816	6.43679
GO:0048477	oogenesis	3.67816	4.13793
GO:0050866	negative regulation of cell activation	3.65854	1.70732
GO:0030336	negative regulation of cell migration	3.64198	1.41975
GO:0032940	secretion by cell	3.64067	2.42711
GO:0003230	cardiac atrium development	3.63637	7.27273
GO:0003338	metanephros morphogenesis	3.63637	14.5455
GO:0006044	N-acetylglucosamine metabolic process	3.63637	0
GO:0007398	ectoderm development	3.63637	3.63637
GO:0009395	phospholipid catabolic process	3.63637	3.63637
GO:0009954	proximal/distal pattern formation	3.63637	3.63637
GO:0010226	response to lithium ion	3.63637	0
GO:0019079	viral genome replication	3.63637	3.63637
GO:0032369	negative regulation of lipid transport	3.63637	3.63637
GO:0033137	negative regulation of peptidyl-serine phosphorylation	3.63637	0
GO:0043922	negative regulation by host of viral transcription	3.63637	3.63637
GO:0048009	insulin-like growth factor receptor signaling pathway	3.63637	3.63637
GO:0048070	regulation of developmental pigmentation	3.63637	3.63637
GO:0051304	chromosome separation	3.63637	3.63637
GO:0051412	response to corticosterone	3.63637	7.27273
GO:0060561	apoptotic process involved in morphogenesis	3.63637	7.27273
GO:0061311	cell surface receptor signaling pathway involved in heart development	3.63637	3.63637
GO:0072210	metanephric nephron development	3.63637	18.1818
GO:1900151	regulation of nuclear-transcribed mRNA catabolic process, deadenylation-dependent decay	3.63637	0
GO:1901379	regulation of potassium ion transmembrane transport	3.63637	0
GO:2000142	regulation of DNA-templated transcription, initiation	3.63637	3.63637
GO:2000242	negative regulation of reproductive process	3.63637	3.63637
GO:0007600	sensory perception	3.63117	1.84959
GO:0007093	mitotic cell cycle checkpoint	3.6284	5.96393
GO:0006865	amino acid transport	3.62829	2.29545
GO:0030819	positive regulation of cAMP biosynthetic process	3.62319	4.34783
GO:0045913	positive regulation of carbohydrate metabolic process	3.62319	0.724638
GO:0048546	digestive tract morphogenesis	3.62319	2.17391
GO:1902041	regulation of extrinsic apoptotic signaling pathway via death domain receptors	3.62319	2.89855
GO:0071774	response to fibroblast growth factor	3.61345	2.29692
GO:0006887	exocytosis	3.58522	2.72109
GO:0008277	regulation of G-protein coupled receptor protein signaling pathway	3.55709	2.00803
GO:0003007	heart morphogenesis	3.55556	2.66667
GO:0051271	negative regulation of cellular component movement	3.55277	1.25392
GO:0010564	regulation of cell cycle process	3.54817	4.21449
GO:0008543	fibroblast growth factor receptor signaling pathway	3.53926	2.02703
GO:0006333	chromatin assembly or disassembly	3.5333	5.5135
GO:0040013	negative regulation of locomotion	3.5333	1.5531
GO:0021987	cerebral cortex development	3.53153	2.45045
GO:0051438	regulation of ubiquitin-protein transferase activity	3.52847	8.55387
GO:0003382	epithelial cell morphogenesis	3.50877	2.33918
GO:0007606	sensory perception of chemical stimulus	3.50877	1.16959
GO:0010660	regulation of muscle cell apoptotic process	3.50877	3.50877
GO:0032855	positive regulation of Rac GTPase activity	3.50877	0
GO:0045600	positive regulation of fat cell differentiation	3.50877	2.33918
GO:0046676	negative regulation of insulin secretion	3.50877	0
GO:0090278	negative regulation of peptide hormone secretion	3.50877	0
GO:2000179	positive regulation of neural precursor cell proliferation	3.50877	5.84796
GO:0043244	regulation of protein complex disassembly	3.5065	1.68831
GO:0048015	phosphatidylinositol-mediated signaling	3.48782	2.48447
GO:0048017	inositol lipid-mediated signaling	3.48782	2.48447
GO:0051084	'de novo' posttranslational protein folding	3.48432	14.8664
GO:0034968	histone lysine methylation	3.48331	0.580552
GO:0018105	peptidyl-serine phosphorylation	3.48182	1.33129
GO:0032103	positive regulation of response to external stimulus	3.48019	2.81377
GO:0010970	microtubule-based transport	3.47826	1.82195
GO:0007405	neuroblast proliferation	3.46321	5.19481
GO:0051893	regulation of focal adhesion assembly	3.46321	2.5974
GO:0071277	cellular response to calcium ion	3.46321	2.5974
GO:0090109	regulation of cell-substrate junction assembly	3.46321	2.5974
GO:0010720	positive regulation of cell development	3.44957	2.27472
GO:2000146	negative regulation of cell motility	3.44234	1.31956
GO:1903036	positive regulation of response to wounding	3.44086	4.73119
GO:0007585	respiratory gaseous exchange	3.41881	1.1396
GO:0030837	negative regulation of actin filament polymerization	3.41881	5.69801
GO:0044344	cellular response to fibroblast growth factor stimulus	3.41832	2.19342
GO:0006260	DNA replication	3.41106	6.0557
GO:0000075	cell cycle checkpoint	3.3906	4.99488
GO:0051216	cartilage development	3.38445	2.43258
GO:0051051	negative regulation of transport	3.36451	2.51083
GO:0038179	neurotrophin signaling pathway	3.36306	1.67224
GO:0032271	regulation of protein polymerization	3.35443	2.97469
GO:2000026	regulation of multicellular organismal development	3.34027	1.79496
GO:0045667	regulation of osteoblast differentiation	3.33626	2.80948
GO:0000422	mitochondrion degradation	3.33334	6.66667
GO:0001658	branching involved in ureteric bud morphogenesis	3.33334	5
GO:0007631	feeding behavior	3.33334	3.33334
GO:0015949	nucleobase-containing small molecule interconversion	3.33334	3.33334
GO:0016572	histone phosphorylation	3.33334	6.66667
GO:0016601	Rac protein signal transduction	3.33334	0
GO:0030816	positive regulation of cAMP metabolic process	3.33334	6.66667
GO:0031100	organ regeneration	3.33334	4.66667
GO:0032897	negative regulation of viral transcription	3.33334	1.66667
GO:0034260	negative regulation of GTPase activity	3.33334	0
GO:0051149	positive regulation of muscle cell differentiation	3.33334	2.82051
GO:0060840	artery development	3.33334	4
GO:0006886	intracellular protein transport	3.322	7.38636
GO:0044087	regulation of cellular component biogenesis	3.31739	1.86971
GO:0044772	mitotic cell cycle phase transition	3.31081	4.46901
GO:0035303	regulation of dephosphorylation	3.31062	1.88251
GO:0032319	regulation of Rho GTPase activity	3.30877	1.21212
GO:1901991	negative regulation of mitotic cell cycle phase transition	3.30852	5.34326
GO:0032970	regulation of actin filament-based process	3.30565	2.5639
GO:0060541	respiratory system development	3.29444	2.24205
GO:0006900	membrane budding	3.28503	0.57971
GO:0072091	regulation of stem cell proliferation	3.28503	3.09179
GO:0048011	neurotrophin TRK receptor signaling pathway	3.28073	1.66428
GO:0010639	negative regulation of organelle organization	3.27916	3.39322
GO:0044770	cell cycle phase transition	3.26651	4.44176
GO:0051896	regulation of protein kinase B signaling	3.25815	1.62907
GO:1901988	negative regulation of cell cycle phase transition	3.24115	5.40192
GO:0055007	cardiac muscle cell differentiation	3.23887	1.88934
GO:0030324	lung development	3.23244	2.23332
GO:0001667	ameboidal cell migration	3.22982	2.07039
GO:0002685	regulation of leukocyte migration	3.22581	2.41936
GO:0042733	embryonic digit morphogenesis	3.22581	3.62903
GO:0051340	regulation of ligase activity	3.22345	7.81441
GO:0046879	hormone secretion	3.21839	5.51724
GO:0051129	negative regulation of cellular component organization	3.21544	2.5848
GO:0010817	regulation of hormone levels	3.20988	3.51852
GO:0007346	regulation of mitotic cell cycle	3.19743	4.05733
GO:0048732	gland development	3.19619	3.3393
GO:0032321	positive regulation of Rho GTPase activity	3.19149	1.06383
GO:0007010	cytoskeleton organization	3.18471	2.5897
GO:0022603	regulation of anatomical structure morphogenesis	3.18118	1.75937
GO:0006027	glycosaminoglycan catabolic process	3.17461	2.6455
GO:0030323	respiratory tube development	3.17374	2.07934
GO:0002576	platelet degranulation	3.17125	11.6279
GO:0051270	regulation of cellular component movement	3.16652	1.98564
GO:0032387	negative regulation of intracellular transport	3.16599	2.26142
GO:0060348	bone development	3.16384	1.46893
GO:0030072	peptide hormone secretion	3.16206	1.58103
GO:0030193	regulation of blood coagulation	3.16206	5.5336
GO:0045668	negative regulation of osteoblast differentiation	3.16206	2.37154
GO:1900046	regulation of hemostasis	3.16206	5.5336
GO:0002792	negative regulation of peptide secretion	3.1579	0
GO:0045216	cell-cell junction organization	3.1579	0.789474
GO:0046888	negative regulation of hormone secretion	3.1579	0
GO:0050729	positive regulation of inflammatory response	3.1579	8.42106
GO:0090398	cellular senescence	3.1579	2.10526
GO:1902882	regulation of response to oxidative stress	3.1579	5.26316
GO:0060537	muscle tissue development	3.13346	1.65219
GO:0006029	proteoglycan metabolic process	3.11688	1.2987
GO:0043524	negative regulation of neuron apoptotic process	3.1149	1.88069
GO:0045595	regulation of cell differentiation	3.11324	1.7013
GO:0071229	cellular response to acid	3.10127	2.27848
GO:0001763	morphogenesis of a branching structure	3.10078	2.29885
GO:0032318	regulation of Ras GTPase activity	3.1	1.03054
GO:0048562	embryonic organ morphogenesis	3.0888	2.09138
GO:0010038	response to metal ion	3.08623	2.56491
GO:0009880	embryonic pattern specification	3.07692	1.84615
GO:0030834	regulation of actin filament depolymerization	3.07692	1.23077
GO:0035914	skeletal muscle cell differentiation	3.07692	0.615385
GO:0090068	positive regulation of cell cycle process	3.07692	4.91315
GO:0051650	establishment of vesicle localization	3.06574	1.1378
GO:0046903	secretion	3.05431	2.25957
GO:0033500	carbohydrate homeostasis	3.05165	2.03443
GO:0042593	glucose homeostasis	3.05165	2.03443
GO:0043547	positive regulation of GTPase activity	3.05117	1.27212
GO:0021915	neural tube development	3.04983	2.4055
GO:0016032	viral process	3.03135	9.91827
GO:0001829	trophectodermal cell differentiation	3.0303	0
GO:0001906	cell killing	3.0303	15.1515
GO:0001958	endochondral ossification	3.0303	3.0303
GO:0002052	positive regulation of neuroblast proliferation	3.0303	3.0303
GO:0002067	glandular epithelial cell differentiation	3.0303	9.09091
GO:0007200	phospholipase C-activating G-protein coupled receptor signaling pathway	3.0303	3.0303
GO:0007608	sensory perception of smell	3.0303	0
GO:0009214	cyclic nucleotide catabolic process	3.0303	0
GO:0010971	positive regulation of G2/M transition of mitotic cell cycle	3.0303	3.0303
GO:0019082	viral protein processing	3.0303	18.1818
GO:0019319	hexose biosynthetic process	3.0303	8.71213
GO:0030318	melanocyte differentiation	3.0303	3.0303
GO:0033599	regulation of mammary gland epithelial cell proliferation	3.0303	0
GO:0036075	replacement ossification	3.0303	3.0303
GO:0036092	phosphatidylinositol-3-phosphate biosynthetic process	3.0303	0
GO:0042149	cellular response to glucose starvation	3.0303	0
GO:0042347	negative regulation of NF-kappaB import into nucleus	3.0303	3.0303
GO:0043496	regulation of protein homodimerization activity	3.0303	3.0303
GO:0044818	mitotic G2/M transition checkpoint	3.0303	9.09091
GO:0045214	sarcomere organization	3.0303	9.09091
GO:0048730	epidermis morphogenesis	3.0303	3.0303
GO:0050663	cytokine secretion	3.0303	9.09091
GO:0051209	release of sequestered calcium ion into cytosol	3.0303	0
GO:0051283	negative regulation of sequestering of calcium ion	3.0303	0
GO:0055070	copper ion homeostasis	3.0303	3.0303
GO:0060706	cell differentiation involved in embryonic placenta development	3.0303	9.09091
GO:0060713	labyrinthine layer morphogenesis	3.0303	9.09091
GO:0065005	protein-lipid complex assembly	3.0303	3.0303
GO:0072028	nephron morphogenesis	3.0303	12.1212
GO:0072337	modified amino acid transport	3.0303	12.1212
GO:1902751	positive regulation of cell cycle G2/M phase transition	3.0303	3.0303
GO:2000108	positive regulation of leukocyte apoptotic process	3.0303	0
GO:2000177	regulation of neural precursor cell proliferation	3.0303	4.54546
GO:0060341	regulation of cellular localization	3.02929	2.14868
GO:0090287	regulation of cellular response to growth factor stimulus	3.02632	1.92983
GO:0001657	ureteric bud development	3.02521	4.36975
GO:0007162	negative regulation of cell adhesion	3.02481	2.05687
GO:0001822	kidney development	3.01991	2.37932
GO:0045744	negative regulation of G-protein coupled receptor protein signaling pathway	3.01975	1.16144
GO:0042445	hormone metabolic process	3.01659	3.01659
GO:0035050	embryonic heart tube development	3.003	0.900901
GO:0061138	morphogenesis of a branching epithelium	2.99736	2.40964
GO:0044764	multi-organism cellular process	2.99603	9.88161
GO:0016482	cytoplasmic transport	2.99432	7.63499
GO:0090066	regulation of anatomical structure size	2.9938	2.2636
GO:0018209	peptidyl-serine modification	2.98508	1.40474
GO:0016571	histone methylation	2.98368	0.652681
GO:0090090	negative regulation of canonical Wnt signaling pathway	2.98039	2.35294
GO:0030278	regulation of ossification	2.97806	2.82132
GO:0045165	cell fate commitment	2.97415	3.43171
GO:0032526	response to retinoic acid	2.96022	2.22017
GO:0006026	aminoglycan catabolic process	2.95567	2.46306
GO:0006305	DNA alkylation	2.95567	0.985222
GO:0006306	DNA methylation	2.95567	0.985222
GO:0006695	cholesterol biosynthetic process	2.95567	4.4335
GO:0050673	epithelial cell proliferation	2.95567	1.47783
GO:0006448	regulation of translational elongation	2.94118	2.94118
GO:0007159	leukocyte cell-cell adhesion	2.94118	2.94118
GO:0031644	regulation of neurological system process	2.94118	0
GO:0034605	cellular response to heat	2.94118	2.94118
GO:0048854	brain morphogenesis	2.94118	1.47059
GO:0060396	growth hormone receptor signaling pathway	2.94118	2.94118
GO:0070933	histone H4 deacetylation	2.94118	0
GO:0071320	cellular response to cAMP	2.94118	0
GO:0071378	cellular response to growth hormone stimulus	2.94118	2.94118
GO:0030001	metal ion transport	2.92992	1.38026
GO:0014706	striated muscle tissue development	2.92906	1.67811
GO:0009952	anterior/posterior pattern specification	2.92839	2.37932
GO:1901215	negative regulation of neuron death	2.92581	1.77639
GO:0007605	sensory perception of sound	2.90381	1.5729
GO:0031333	negative regulation of protein complex assembly	2.90381	4.23473
GO:0048593	camera-type eye morphogenesis	2.90276	2.17707
GO:0002790	peptide secretion	2.89855	1.44928
GO:0014003	oligodendrocyte development	2.89855	2.17391
GO:0043623	cellular protein complex assembly	2.89678	2.96478
GO:0006898	receptor-mediated endocytosis	2.89515	1.72144
GO:0035023	regulation of Rho protein signal transduction	2.89032	1.1871
GO:0009791	post-embryonic development	2.88462	0.865385
GO:0055074	calcium ion homeostasis	2.88288	0.950042
GO:0051153	regulation of striated muscle cell differentiation	2.87929	3.10078
GO:0071222	cellular response to lipopolysaccharide	2.87929	3.32226
GO:0051648	vesicle localization	2.87708	1.05398
GO:0006901	vesicle coating	2.85714	0.317461
GO:0010390	histone monoubiquitination	2.85714	3.80953
GO:0014037	Schwann cell differentiation	2.85714	1.90476
GO:0043388	positive regulation of DNA binding	2.85714	8.57143
GO:0043489	RNA stabilization	2.85714	2.85714
GO:0048255	mRNA stabilization	2.85714	2.85714
GO:0048844	artery morphogenesis	2.85714	3.80953
GO:0060674	placenta blood vessel development	2.85714	2.85714
GO:1901990	regulation of mitotic cell cycle phase transition	2.857	4.19684
GO:0051049	regulation of transport	2.85633	1.70529
GO:0009262	deoxyribonucleotide metabolic process	2.849	3.41881
GO:0046578	regulation of Ras protein signal transduction	2.84734	0.966267
GO:1900542	regulation of purine nucleotide metabolic process	2.83663	1.14652
GO:0051480	cytosolic calcium ion homeostasis	2.82828	0.808081
GO:0045471	response to ethanol	2.82486	2.71187
GO:0003143	embryonic heart tube morphogenesis	2.82258	1.20968
GO:0003002	regionalization	2.80985	1.91499
GO:0006140	regulation of nucleotide metabolic process	2.80919	1.18009
GO:0009887	organ morphogenesis	2.80668	1.91779
GO:0051437	positive regulation of ubiquitin-protein ligase activity involved in mitotic cell cycle	2.80416	10.5835
GO:0032320	positive regulation of Ras GTPase activity	2.79923	0.965252
GO:0010948	negative regulation of cell cycle process	2.799	4.77539
GO:0040007	growth	2.79791	1.29415
GO:0031099	regeneration	2.79525	3.63382
GO:0045598	regulation of fat cell differentiation	2.78746	1.62602
GO:1901987	regulation of cell cycle phase transition	2.77528	4.20554
GO:0006458	'de novo' protein folding	2.77521	12.3959
GO:0007127	meiosis I	2.77521	2.22017
GO:0015849	organic acid transport	2.76898	1.83486
GO:0046942	carboxylic acid transport	2.76898	1.83486
GO:0002088	lens development in camera-type eye	2.75862	2.29885
GO:2000241	regulation of reproductive process	2.75862	1.37931
GO:0032147	activation of protein kinase activity	2.75781	1.3789
GO:0006921	cellular component disassembly involved in execution phase of apoptosis	2.75762	1.1611
GO:0071219	cellular response to molecule of bacterial origin	2.74842	3.17125
GO:0044403	symbiosis, encompassing mutualism through parasitism	2.73922	9.25852
GO:0044419	interspecies interaction between organisms	2.73922	9.25852
GO:0072507	divalent inorganic cation homeostasis	2.73465	1.16793
GO:0033043	regulation of organelle organization	2.72762	2.33843
GO:0048863	stem cell differentiation	2.71841	2.28504
GO:0030307	positive regulation of cell growth	2.71371	1.62822
GO:0070372	regulation of ERK1 and ERK2 cascade	2.71371	1.99005
GO:0001655	urogenital system development	2.71133	2.14172
GO:0007163	establishment or maintenance of cell polarity	2.71003	1.38513
GO:0034330	cell junction organization	2.7027	0.707851
GO:0001843	neural tube closure	2.6936	1.48148
GO:0060606	tube closure	2.6936	1.48148
GO:0042475	odontogenesis of dentin-containing tooth	2.68908	4.36975
GO:1901992	positive regulation of mitotic cell cycle phase transition	2.68908	3.02521
GO:0071822	protein complex subunit organization	2.68381	5.36406
GO:0050793	regulation of developmental process	2.68084	1.63374
GO:0017015	regulation of transforming growth factor beta receptor signaling pathway	2.67857	2.38095
GO:0051094	positive regulation of developmental process	2.67609	1.82345
GO:0000082	G1/S transition of mitotic cell cycle	2.67477	6.09929
GO:0044843	cell cycle G1/S phase transition	2.67477	6.09929
GO:0045597	positive regulation of cell differentiation	2.66716	1.85506
GO:0050818	regulation of coagulation	2.66667	4.66667
GO:0051443	positive regulation of ubiquitin-protein transferase activity	2.66667	9.00901
GO:0051147	regulation of muscle cell differentiation	2.66362	2.207
GO:0048598	embryonic morphogenesis	2.66152	1.6905
GO:0043087	regulation of GTPase activity	2.66135	0.996206
GO:0030178	negative regulation of Wnt signaling pathway	2.66041	2.34742
GO:0032879	regulation of localization	2.65783	1.69536
GO:0006284	base-excision repair	2.65781	5.31562
GO:0042308	negative regulation of protein import into nucleus	2.65781	0.885936
GO:0032092	positive regulation of protein binding	2.65152	1.51515
GO:0061097	regulation of protein tyrosine kinase activity	2.65152	0.757576
GO:0040012	regulation of locomotion	2.64895	1.67188
GO:0010595	positive regulation of endothelial cell migration	2.6455	2.1164
GO:0031016	pancreas development	2.6455	5.29101
GO:0033124	regulation of GTP catabolic process	2.64546	0.990259
GO:0051056	regulation of small GTPase mediated signal transduction	2.63831	0.993487
GO:0048610	cellular process involved in reproduction	2.63472	2.17943
GO:0043523	regulation of neuron apoptotic process	2.61708	1.62535
GO:0009605	response to external stimulus	2.6161	2.24842
GO:0006541	glutamine metabolic process	2.61438	0
GO:0006654	phosphatidic acid biosynthetic process	2.61438	1.30719
GO:0021895	cerebral cortex neuron differentiation	2.61438	3.92157
GO:0030199	collagen fibril organization	2.61438	6.53595
GO:0030206	chondroitin sulfate biosynthetic process	2.61438	2.61438
GO:0046329	negative regulation of JNK cascade	2.61438	0
GO:0046473	phosphatidic acid metabolic process	2.61438	1.30719
GO:0072665	protein localization to vacuole	2.61438	6.53595
GO:1901532	regulation of hematopoietic progenitor cell differentiation	2.61438	5.22876
GO:0034329	cell junction assembly	2.6081	0.823611
GO:0072001	renal system development	2.60756	2.28886
GO:0051130	positive regulation of cellular component organization	2.6027	1.55003
GO:0045927	positive regulation of growth	2.59799	2.01568
GO:0001885	endothelial cell development	2.5974	2.5974
GO:0055013	cardiac muscle cell development	2.5974	0.865801
GO:0060326	cell chemotaxis	2.5974	6.75325
GO:0061383	trabecula morphogenesis	2.5974	4.32901
GO:0061448	connective tissue development	2.58176	1.83592
GO:0007266	Rho protein signal transduction	2.58065	2.15054
GO:0016574	histone ubiquitination	2.58065	1.72043
GO:0035020	regulation of Rac protein signal transduction	2.58065	0.860216
GO:0010506	regulation of autophagy	2.57937	1.28968
GO:0002009	morphogenesis of an epithelium	2.57396	1.64077
GO:0051651	maintenance of location in cell	2.57182	2.73598
GO:0006364	rRNA processing	2.56881	6.07173
GO:0000060	protein import into nucleus, translocation	2.5641	2.5641
GO:0001912	positive regulation of leukocyte mediated cytotoxicity	2.5641	2.5641
GO:0006536	glutamate metabolic process	2.5641	2.5641
GO:0009065	glutamine family amino acid catabolic process	2.5641	2.5641
GO:0009409	response to cold	2.5641	0
GO:0030317	sperm motility	2.5641	0
GO:0032365	intracellular lipid transport	2.5641	2.5641
GO:0033158	regulation of protein import into nucleus, translocation	2.5641	2.5641
GO:0034405	response to fluid shear stress	2.5641	2.5641
GO:0043277	apoptotic cell clearance	2.5641	0
GO:0043278	response to morphine	2.5641	2.5641
GO:0044705	multi-organism reproductive behavior	2.5641	0
GO:0045737	positive regulation of cyclin-dependent protein kinase activity	2.5641	2.5641
GO:0045815	positive regulation of gene expression, epigenetic	2.5641	5.12821
GO:0046632	alpha-beta T cell differentiation	2.5641	5.12821
GO:0050775	positive regulation of dendrite morphogenesis	2.5641	0
GO:0051282	regulation of sequestering of calcium ion	2.5641	0
GO:2000243	positive regulation of reproductive process	2.5641	0
GO:0045669	positive regulation of osteoblast differentiation	2.56046	2.27596
GO:0097194	execution phase of apoptosis	2.56017	0.819253
GO:0006874	cellular calcium ion homeostasis	2.55166	0.934412
GO:0014020	primary neural tube formation	2.54084	1.93588
GO:0032507	maintenance of protein location in cell	2.53165	2.20708
GO:0048839	inner ear development	2.52905	2.5974
GO:0032956	regulation of actin cytoskeleton organization	2.52826	2.32271
GO:0051098	regulation of binding	2.52826	2.8777
GO:0007584	response to nutrient	2.52438	1.54905
GO:0009118	regulation of nucleoside metabolic process	2.51909	0.997843
GO:0016071	mRNA metabolic process	2.50528	8.95047
GO:0033121	regulation of purine nucleotide catabolic process	2.50231	0.994153
GO:0030811	regulation of nucleotide catabolic process	2.50073	0.994782
GO:0048771	tissue remodeling	2.49555	2.49555
GO:2000377	regulation of reactive oxygen species metabolic process	2.49555	4.99109
GO:1901214	regulation of neuron death	2.48348	1.50376
GO:0006338	chromatin remodeling	2.48264	2.44057
GO:1901654	response to ketone	2.48227	3.19149
GO:0003012	muscle system process	2.47779	3.13231
GO:0007628	adult walking behavior	2.46306	0
GO:0032091	negative regulation of protein binding	2.46306	1.47783
GO:0042992	negative regulation of transcription factor import into nucleus	2.46306	1.47783
GO:0003281	ventricular septum development	2.46154	4.30769
GO:0015807	L-amino acid transport	2.46154	3.07692
GO:0018958	phenol-containing compound metabolic process	2.46154	1.23077
GO:0060411	cardiac septum morphogenesis	2.46154	3.07692
GO:0048592	eye morphogenesis	2.4583	1.84372
GO:0007596	blood coagulation	2.45709	2.87133
GO:0050817	coagulation	2.45709	2.87133
GO:0048729	tissue morphogenesis	2.45505	1.83264
GO:0060562	epithelial tube morphogenesis	2.45399	1.80262
GO:0010563	negative regulation of phosphorus metabolic process	2.45238	1.4127
GO:0045936	negative regulation of phosphate metabolic process	2.45238	1.4127
GO:0048024	regulation of mRNA splicing, via spliceosome	2.43903	6.58537
GO:0030168	platelet activation	2.43363	4.36157
GO:0051591	response to cAMP	2.42915	2.42915
GO:0007599	hemostasis	2.42607	2.82856
GO:0006813	potassium ion transport	2.42424	1.21212
GO:0072503	cellular divalent inorganic cation homeostasis	2.42199	1.14889
GO:0034220	ion transmembrane transport	2.42152	3.78442
GO:0016126	sterol biosynthetic process	2.41936	4.03226
GO:0032846	positive regulation of homeostatic process	2.41936	1.20968
GO:0002683	negative regulation of immune system process	2.40741	1.66667
GO:0010632	regulation of epithelial cell migration	2.40385	2.01923
GO:0003279	cardiac septum development	2.4024	3.90391
GO:0007077	mitotic nuclear envelope disassembly	2.4024	5.40541
GO:0009064	glutamine family amino acid metabolic process	2.4024	1.2012
GO:1901989	positive regulation of cell cycle phase transition	2.4024	3.003
GO:0051351	positive regulation of ligase activity	2.40182	8.11425
GO:0071901	negative regulation of protein serine/threonine kinase activity	2.40182	1.29828
GO:0035335	peptidyl-tyrosine dephosphorylation	2.40166	0.910974
GO:0060627	regulation of vesicle-mediated transport	2.39246	1.59497
GO:0016072	rRNA metabolic process	2.39093	5.68235
GO:0007169	transmembrane receptor protein tyrosine kinase signaling pathway	2.38333	1.46273
GO:0035239	tube morphogenesis	2.38079	1.78211
GO:0040017	positive regulation of locomotion	2.38031	2.11186
GO:0001841	neural tube formation	2.3705	2.19491
GO:0051093	negative regulation of developmental process	2.37019	1.59442
GO:0044265	cellular macromolecule catabolic process	2.35767	5.56022
GO:0009306	protein secretion	2.35294	1.68067
GO:0046823	negative regulation of nucleocytoplasmic transport	2.35294	1.88235
GO:0051250	negative regulation of lymphocyte activation	2.35294	0.672269
GO:0035295	tube development	2.3477	1.68657
GO:0021532	neural tube patterning	2.33918	3.50877
GO:0030073	insulin secretion	2.33918	1.16959
GO:0043001	Golgi to plasma membrane protein transport	2.33918	0
GO:0043550	regulation of lipid kinase activity	2.33918	0
GO:0043589	skin morphogenesis	2.33918	2.33918
GO:0045055	regulated secretory pathway	2.33918	4.67837
GO:0048146	positive regulation of fibroblast proliferation	2.33918	1.16959
GO:0050650	chondroitin sulfate proteoglycan biosynthetic process	2.33918	2.33918
GO:0050931	pigment cell differentiation	2.33918	2.33918
GO:0051004	regulation of lipoprotein lipase activity	2.33918	4.67837
GO:0051057	positive regulation of small GTPase mediated signal transduction	2.33918	1.16959
GO:0052312	modulation of transcription in other organism involved in symbiotic interaction	2.33918	3.50877
GO:0060688	regulation of morphogenesis of a branching structure	2.33918	3.50877
GO:1900739	regulation of protein insertion into mitochondrial membrane involved in apoptotic signaling pathway	2.33918	11.6959
GO:1900740	positive regulation of protein insertion into mitochondrial membrane involved in apoptotic signaling pathway	2.33918	11.6959
GO:0090317	negative regulation of intracellular protein transport	2.33782	1.87025
GO:0051495	positive regulation of cytoskeleton organization	2.331	1.4652
GO:0009749	response to glucose	2.32681	2.85563
GO:0007265	Ras protein signal transduction	2.32596	1.27764
GO:0019217	regulation of fatty acid metabolic process	2.32558	0.422833
GO:0033673	negative regulation of kinase activity	2.32271	1.52107
GO:0030155	regulation of cell adhesion	2.31132	1.68239
GO:0048568	embryonic organ development	2.30996	2.04633
GO:0010634	positive regulation of epithelial cell migration	2.30769	2.05128
GO:0006469	negative regulation of protein kinase activity	2.30182	1.62067
GO:0097305	response to alcohol	2.29961	3.47153
GO:0002822	regulation of adaptive immune response based on somatic recombination of immune receptors built from immunoglobulin superfamily domains	2.29885	1.83908
GO:1901888	regulation of cell junction assembly	2.29885	1.83908
GO:0006479	protein methylation	2.29822	0.656635
GO:0008213	protein alkylation	2.29822	0.656635
GO:0043393	regulation of protein binding	2.2921	1.64561
GO:0030217	T cell differentiation	2.28572	1.79592
GO:0007389	pattern specification process	2.28541	1.71849
GO:0051436	negative regulation of ubiquitin-protein ligase activity involved in mitotic cell cycle	2.28175	10.6151
GO:0030334	regulation of cell migration	2.27941	1.70343
GO:0033077	T cell differentiation in thymus	2.2792	1.7094
GO:0090130	tissue migration	2.27596	1.13798
GO:0034613	cellular protein localization	2.27319	4.38385
GO:0032680	regulation of tumor necrosis factor production	2.27273	6.4394
GO:0001838	embryonic epithelial tube formation	2.26917	2.11268
GO:0010035	response to inorganic substance	2.2659	2.69938
GO:0071417	cellular response to organonitrogen compound	2.26378	1.18182
GO:0007368	determination of left/right symmetry	2.26244	0.904978
GO:0035051	cardiocyte differentiation	2.26244	1.5083
GO:0051050	positive regulation of transport	2.26138	1.85276
GO:0051726	regulation of cell cycle	2.26101	2.54841
GO:2000027	regulation of organ morphogenesis	2.25989	2.25989
GO:0048864	stem cell development	2.25895	2.20386
GO:0043161	proteasome-mediated ubiquitin-dependent protein catabolic process	2.25707	3.83702
GO:0008360	regulation of cell shape	2.25564	1.84552
GO:0060041	retina development in camera-type eye	2.25352	2.49497
GO:0009746	response to hexose	2.25295	2.96979
GO:0046777	protein autophosphorylation	2.25225	1.12613
GO:0070727	cellular macromolecule localization	2.25091	4.33959
GO:0007167	enzyme linked receptor protein signaling pathway	2.24816	1.31592
GO:0006936	muscle contraction	2.24562	3.36842
GO:0007507	heart development	2.23107	1.79574
GO:0022412	cellular process involved in reproduction in multicellular organism	2.22768	1.3104
GO:2000145	regulation of cell motility	2.2232	1.5739
GO:0006821	chloride transport	2.22222	1.5873
GO:0010631	epithelial cell migration	2.22222	1.26984
GO:0090132	epithelium migration	2.22222	1.26984
GO:1902107	positive regulation of leukocyte differentiation	2.22222	0.317461
GO:0010498	proteasomal protein catabolic process	2.21954	3.72607
GO:0006184	GTP catabolic process	2.21912	1.20922
GO:0001933	negative regulation of protein phosphorylation	2.20763	1.45733
GO:0042060	wound healing	2.20703	2.50333
GO:0072175	epithelial tube formation	2.207	2.1309
GO:0001937	negative regulation of endothelial cell proliferation	2.1978	0
GO:0002444	myeloid leukocyte mediated immunity	2.1978	4.39561
GO:0003229	ventricular cardiac muscle tissue development	2.1978	6.59341
GO:0005980	glycogen catabolic process	2.1978	10.989
GO:0007045	cell-substrate adherens junction assembly	2.1978	2.1978
GO:0008631	intrinsic apoptotic signaling pathway in response to oxidative stress	2.1978	4.39561
GO:0009251	glucan catabolic process	2.1978	10.989
GO:0010771	negative regulation of cell morphogenesis involved in differentiation	2.1978	2.1978
GO:0010907	positive regulation of glucose metabolic process	2.1978	0
GO:0014072	response to isoquinoline alkaloid	2.1978	2.1978
GO:0019098	reproductive behavior	2.1978	0
GO:0030513	positive regulation of BMP signaling pathway	2.1978	6.59341
GO:0031648	protein destabilization	2.1978	2.1978
GO:0032401	establishment of melanosome localization	2.1978	2.1978
GO:0032506	cytokinetic process	2.1978	2.1978
GO:0033209	tumor necrosis factor-mediated signaling pathway	2.1978	4.39561
GO:0035088	establishment or maintenance of apical/basal cell polarity	2.1978	0
GO:0042994	cytoplasmic sequestering of transcription factor	2.1978	0
GO:0043330	response to exogenous dsRNA	2.1978	2.1978
GO:0043536	positive regulation of blood vessel endothelial cell migration	2.1978	0
GO:0043551	regulation of phosphatidylinositol 3-kinase activity	2.1978	0
GO:0045070	positive regulation of viral genome replication	2.1978	2.1978
GO:0045661	regulation of myoblast differentiation	2.1978	2.1978
GO:0045746	negative regulation of Notch signaling pathway	2.1978	4.39561
GO:0046503	glycerolipid catabolic process	2.1978	0
GO:0046631	alpha-beta T cell activation	2.1978	4.39561
GO:0048041	focal adhesion assembly	2.1978	2.1978
GO:0050709	negative regulation of protein secretion	2.1978	4.39561
GO:0050854	regulation of antigen receptor-mediated signaling pathway	2.1978	0
GO:0051385	response to mineralocorticoid	2.1978	8.79121
GO:0051668	localization within membrane	2.1978	0
GO:0051905	establishment of pigment granule localization	2.1978	2.1978
GO:0055010	ventricular cardiac muscle tissue morphogenesis	2.1978	6.59341
GO:0060669	embryonic placenta morphogenesis	2.1978	6.59341
GO:0061014	positive regulation of mRNA catabolic process	2.1978	0
GO:0061245	establishment or maintenance of bipolar cell polarity	2.1978	0
GO:0070584	mitochondrion morphogenesis	2.1978	0
GO:0071825	protein-lipid complex subunit organization	2.1978	2.1978
GO:1901071	glucosamine-containing compound metabolic process	2.1978	0
GO:2000379	positive regulation of reactive oxygen species metabolic process	2.1978	13.1868
GO:0007292	female gamete generation	2.19512	2.43903
GO:0009798	axis specification	2.19512	1.46342
GO:0043967	histone H4 acetylation	2.19512	0.97561
GO:0043583	ear development	2.19436	2.66458
GO:0048738	cardiac muscle tissue development	2.18579	1.53006
GO:0006811	ion transport	2.18182	2.69051
GO:0071396	cellular response to lipid	2.1792	3.0255
GO:0009799	specification of symmetry	2.17707	0.870828
GO:0009855	determination of bilateral symmetry	2.17707	0.870828
GO:0032870	cellular response to hormone stimulus	2.17651	1.47578
GO:0016050	vesicle organization	2.17434	1.00951
GO:0003014	renal system process	2.17391	3.62319
GO:0016101	diterpenoid metabolic process	2.17391	1.44928
GO:0030262	apoptotic nuclear changes	2.17391	2.17391
GO:0048678	response to axon injury	2.17391	3.62319
GO:0050764	regulation of phagocytosis	2.17391	8.69566
GO:0055006	cardiac cell development	2.17391	0.724638
GO:0071347	cellular response to interleukin-1	2.17391	1.44928
GO:0090311	regulation of protein deacetylation	2.17391	0.724638
GO:0045786	negative regulation of cell cycle	2.17317	1.88873
GO:0034655	nucleobase-containing compound catabolic process	2.17196	5.53958
GO:1901069	guanosine-containing compound catabolic process	2.16883	1.18182
GO:0001558	regulation of cell growth	2.16081	1.78895
GO:0006513	protein monoubiquitination	2.15925	2.69906
GO:0030397	membrane disassembly	2.15925	4.8583
GO:0046364	monosaccharide biosynthetic process	2.15925	6.74764
GO:0051081	nuclear envelope disassembly	2.15925	4.8583
GO:0006468	protein phosphorylation	2.15811	1.01832
GO:0046700	heterocycle catabolic process	2.15662	5.37584
GO:0046683	response to organophosphorus	2.15488	1.88552
GO:0031532	actin cytoskeleton reorganization	2.15054	0
GO:0050678	regulation of epithelial cell proliferation	2.15054	2.04563
GO:0051047	positive regulation of secretion	2.15006	2.64278
GO:0030335	positive regulation of cell migration	2.14785	2.10614
GO:0045185	maintenance of protein location	2.14505	2.55363
GO:0044270	cellular nitrogen compound catabolic process	2.14427	5.35821
GO:0001501	skeletal system development	2.13904	1.86303
GO:0008589	regulation of smoothened signaling pathway	2.13904	3.56506
GO:0030595	leukocyte chemotaxis	2.13904	9.62567
GO:0071375	cellular response to peptide hormone stimulus	2.13891	0.99971
GO:0046328	regulation of JNK cascade	2.13847	1.1227
GO:0042692	muscle cell differentiation	2.13741	2.09043
GO:0008283	cell proliferation	2.13247	2.13247
GO:0035148	tube formation	2.1312	2.0646
GO:2000147	positive regulation of cell motility	2.12745	2.08805
GO:0070848	response to growth factor	2.12685	1.37348
GO:0043410	positive regulation of MAPK cascade	2.12574	1.88555
GO:0071407	cellular response to organic cyclic compound	2.12226	1.83203
GO:0071363	cellular response to growth factor stimulus	2.12183	1.37059
GO:0045596	negative regulation of cell differentiation	2.11517	1.50799
GO:0007034	vacuolar transport	2.11417	1.90275
GO:0030036	actin cytoskeleton organization	2.10863	1.77533
GO:0050878	regulation of body fluid levels	2.10767	2.49352
GO:0051276	chromosome organization	2.10717	2.19474
GO:1901361	organic cyclic compound catabolic process	2.10689	5.20507
GO:0005978	glycogen biosynthetic process	2.10526	9.47369
GO:0009250	glucan biosynthetic process	2.10526	9.47369
GO:0019674	NAD metabolic process	2.10526	0
GO:0032885	regulation of polysaccharide biosynthetic process	2.10526	1.05263
GO:0048538	thymus development	2.10526	2.10526
GO:0060416	response to growth hormone	2.10526	2.10526
GO:0016202	regulation of striated muscle tissue development	2.10403	2.22092
GO:1901861	regulation of muscle tissue development	2.10403	2.22092
GO:0043933	macromolecular complex subunit organization	2.10367	4.57597
GO:0042306	regulation of protein import into nucleus	2.10225	1.43335
GO:0022407	regulation of cell-cell adhesion	2.1021	1.8018
GO:0044728	DNA methylation or demethylation	2.1021	1.2012
GO:0045619	regulation of lymphocyte differentiation	2.1021	0.3003
GO:0009057	macromolecule catabolic process	2.09543	4.96155
GO:0050865	regulation of cell activation	2.09468	1.6925
GO:0042326	negative regulation of phosphorylation	2.09199	1.32287
GO:0007204	positive regulation of cytosolic calcium ion concentration	2.09059	0.232288
GO:0016055	Wnt signaling pathway	2.08741	1.17417
GO:0019439	aromatic compound catabolic process	2.08341	5.30293
GO:1901653	cellular response to peptide	2.08322	0.992009
GO:0051352	negative regulation of ligase activity	2.08051	9.67888
GO:0051444	negative regulation of ubiquitin-protein transferase activity	2.08051	9.67888
GO:0006023	aminoglycan biosynthetic process	2.0765	1.20219
GO:0006024	glycosaminoglycan biosynthetic process	2.0765	1.20219
GO:0030198	extracellular matrix organization	2.07547	2.0912
GO:0043062	extracellular structure organization	2.07547	2.0912
GO:0030111	regulation of Wnt signaling pathway	2.06693	1.96851
GO:0016331	morphogenesis of embryonic epithelium	2.06541	1.77854
GO:0008544	epidermis development	2.06047	1.83651
GO:1901699	cellular response to nitrogen compound	2.05715	1.2004
GO:0010647	positive regulation of cell communication	2.05447	1.42567
GO:0010256	endomembrane system organization	2.0531	1.06195
GO:0035556	intracellular signal transduction	2.05168	1.31297
GO:0002761	regulation of myeloid leukocyte differentiation	2.05128	0.769231
GO:0007264	small GTPase mediated signal transduction	2.05128	1.01672
GO:0034284	response to monosaccharide	2.05128	2.7972
GO:0070555	response to interleukin-1	2.05128	1.02564
GO:0007281	germ cell development	2.04744	1.29838
GO:0051345	positive regulation of hydrolase activity	2.04426	1.34168
GO:0045860	positive regulation of protein kinase activity	2.04102	1.27008
GO:0015698	inorganic anion transport	2.04082	1.53061
GO:0050731	positive regulation of peptidyl-tyrosine phosphorylation	2.04082	1.87075
GO:0030029	actin filament-based process	2.03949	1.90392
GO:0030010	establishment of cell polarity	2.03515	1.2951
GO:0048754	branching morphogenesis of an epithelial tube	2.03443	1.95618
GO:0048634	regulation of muscle organ development	2.0339	2.14689
GO:0043254	regulation of protein complex assembly	2.03065	2.47127
GO:0060429	epithelium development	2.02881	1.65493
GO:0007517	muscle organ development	2.02586	1.78595
GO:0030203	glycosaminoglycan metabolic process	2.02463	0.930233
GO:0001936	regulation of endothelial cell proliferation	2.0202	1.81818
GO:0046039	GTP metabolic process	2.01766	1.213
GO:0051272	positive regulation of cellular component movement	2.01342	2.50318
GO:0043627	response to estrogen	2.01207	2.57545
GO:0015711	organic anion transport	2.00905	1.24224
GO:1902582	single-organism intracellular transport	2.00229	4.85752
GO:0042254	ribosome biogenesis	2.00166	5.67411
GO:0043535	regulation of blood vessel endothelial cell migration	2	0.666667
GO:1902106	negative regulation of leukocyte differentiation	2	2
GO:0040008	regulation of growth	1.9959	1.65324
GO:0043588	skin development	1.99485	1.99485
GO:0003018	vascular process in circulatory system	1.99147	1.42248
GO:0005977	glycogen metabolic process	1.99147	7.39687
GO:0006073	cellular glucan metabolic process	1.99147	7.39687
GO:0044042	glucan metabolic process	1.99147	7.39687
GO:0031329	regulation of cellular catabolic process	1.98003	0.976455
GO:0001101	response to acid	1.97793	1.81899
GO:0071495	cellular response to endogenous stimulus	1.97569	1.47028
GO:1900180	regulation of protein localization to nucleus	1.97369	1.62281
GO:0007259	JAK-STAT cascade	1.97044	1.47783
GO:0015833	peptide transport	1.97044	0.985222
GO:0043525	positive regulation of neuron apoptotic process	1.97044	0.492611
GO:0060711	labyrinthine layer development	1.97044	5.41872
GO:0009790	embryo development	1.96935	1.36467
GO:0023056	positive regulation of signaling	1.96921	1.39404
GO:0051235	maintenance of location	1.9656	2.88288
GO:0002237	response to molecule of bacterial origin	1.96354	2.29079
GO:0006998	nuclear envelope organization	1.95667	3.3543
GO:0042476	odontogenesis	1.95036	4.43263
GO:0060070	canonical Wnt signaling pathway	1.95036	2.65958
GO:0043010	camera-type eye development	1.94647	1.84069
GO:0032872	regulation of stress-activated MAPK cascade	1.94137	1.04834
GO:0070302	regulation of stress-activated protein kinase signaling cascade	1.94137	1.04834
GO:0009611	response to wounding	1.93884	2.57849
GO:0033674	positive regulation of kinase activity	1.9383	1.2194
GO:0055001	muscle cell development	1.93588	3.99274
GO:0006022	aminoglycan metabolic process	1.93313	0.888193
GO:0032496	response to lipopolysaccharide	1.93313	2.50784
GO:0055082	cellular chemical homeostasis	1.9321	2.33311
GO:0009888	tissue development	1.93075	1.64808
GO:0072358	cardiovascular system development	1.92986	1.73996
GO:0072359	circulatory system development	1.92986	1.73996
GO:1901701	cellular response to oxygen-containing compound	1.92231	1.73585
GO:0055065	metal ion homeostasis	1.91805	1.65068
GO:0008284	positive regulation of cell proliferation	1.91738	2.17026
GO:0009894	regulation of catabolic process	1.91474	0.950277
GO:0001775	cell activation	1.90904	2.58282
GO:0000272	polysaccharide catabolic process	1.90476	9.52382
GO:0001910	regulation of leukocyte mediated cytotoxicity	1.90476	1.90476
GO:0002711	positive regulation of T cell mediated immunity	1.90476	1.90476
GO:0006110	regulation of glycolytic process	1.90476	1.90476
GO:0006656	phosphatidylcholine biosynthetic process	1.90476	0
GO:0006940	regulation of smooth muscle contraction	1.90476	1.90476
GO:0007020	microtubule nucleation	1.90476	0
GO:0010524	positive regulation of calcium ion transport into cytosol	1.90476	1.90476
GO:0016226	iron-sulfur cluster assembly	1.90476	0
GO:0017145	stem cell division	1.90476	1.90476
GO:0021533	cell differentiation in hindbrain	1.90476	0
GO:0022400	regulation of rhodopsin mediated signaling pathway	1.90476	5.71429
GO:0030166	proteoglycan biosynthetic process	1.90476	0.952382
GO:0031163	metallo-sulfur cluster assembly	1.90476	0
GO:0031343	positive regulation of cell killing	1.90476	1.90476
GO:0031641	regulation of myelination	1.90476	0
GO:0032438	melanosome organization	1.90476	1.90476
GO:0032925	regulation of activin receptor signaling pathway	1.90476	1.90476
GO:0035065	regulation of histone acetylation	1.90476	3.80953
GO:0042491	auditory receptor cell differentiation	1.90476	7.61905
GO:0044247	cellular polysaccharide catabolic process	1.90476	9.52382
GO:0045582	positive regulation of T cell differentiation	1.90476	0
GO:0045648	positive regulation of erythrocyte differentiation	1.90476	3.80953
GO:0046209	nitric oxide metabolic process	1.90476	8.57143
GO:0046427	positive regulation of JAK-STAT cascade	1.90476	3.80953
GO:0050690	regulation of defense response to virus by virus	1.90476	3.80953
GO:0050871	positive regulation of B cell activation	1.90476	3.80953
GO:0060021	palate development	1.90476	0.952382
GO:0070932	histone H3 deacetylation	1.90476	0
GO:0097503	sialylation	1.90476	3.80953
GO:1902692	regulation of neuroblast proliferation	1.90476	1.90476
GO:1902930	regulation of alcohol biosynthetic process	1.90476	1.90476
GO:1901068	guanosine-containing compound metabolic process	1.89983	1.21978
GO:0032386	regulation of intracellular transport	1.89433	2.12372
GO:0006959	humoral immune response	1.89394	9.84849
GO:0045639	positive regulation of myeloid cell differentiation	1.89394	1.13636
GO:0097306	cellular response to alcohol	1.89394	2.65152
GO:0090092	regulation of transmembrane receptor protein serine/threonine kinase signaling pathway	1.89354	2.10394
GO:0048878	chemical homeostasis	1.8922	1.81144
GO:0045859	regulation of protein kinase activity	1.89012	1.38359
GO:0010562	positive regulation of phosphorus metabolic process	1.88985	1.44671
GO:0045937	positive regulation of phosphate metabolic process	1.88985	1.44671
GO:0055085	transmembrane transport	1.88756	2.49567
GO:0045444	fat cell differentiation	1.88679	1.30624
GO:0051384	response to glucocorticoid	1.88679	3.48331
GO:0034146	toll-like receptor 5 signaling pathway	1.88552	2.28956
GO:0034166	toll-like receptor 10 signaling pathway	1.88552	2.28956
GO:0071216	cellular response to biotic stimulus	1.88552	2.42424
GO:0030856	regulation of epithelial cell differentiation	1.88235	2.35294
GO:0000723	telomere maintenance	1.8797	6.14035
GO:0043473	pigmentation	1.8797	1.25313
GO:0006875	cellular metal ion homeostasis	1.87883	1.9266
GO:2000736	regulation of stem cell differentiation	1.87075	2.89116
GO:0030855	epithelial cell differentiation	1.86865	2.03115
GO:0043009	chordate embryonic development	1.8652	1.30501
GO:0009792	embryo development ending in birth or egg hatching	1.86427	1.31339
GO:0051336	regulation of hydrolase activity	1.8609	1.12669
GO:0001944	vasculature development	1.86031	1.98479
GO:0006812	cation transport	1.86011	2.92479
GO:0002694	regulation of leukocyte activation	1.85824	1.26437
GO:0002756	MyD88-independent toll-like receptor signaling pathway	1.85792	2.51366
GO:0043484	regulation of RNA splicing	1.85792	7.21312
GO:0000165	MAPK cascade	1.85555	1.38579
GO:0007423	sensory organ development	1.85305	1.68597
GO:0010594	regulation of endothelial cell migration	1.85014	2.22017
GO:0031098	stress-activated protein kinase signaling cascade	1.84874	1.51261
GO:0051403	stress-activated MAPK cascade	1.84874	1.51261
GO:0050900	leukocyte migration	1.84769	4.49438
GO:0006891	intra-Golgi vesicle-mediated transport	1.84615	0.615385
GO:0008154	actin polymerization or depolymerization	1.84615	1.23077
GO:0030032	lamellipodium assembly	1.84615	0
GO:0042490	mechanoreceptor differentiation	1.84615	3.07692
GO:0097529	myeloid leukocyte migration	1.84615	8.61539
GO:0051224	negative regulation of protein transport	1.84552	1.98223
GO:0045944	positive regulation of transcription from RNA polymerase II promoter	1.84429	1.73348
GO:0014070	response to organic cyclic compound	1.84419	2.13574
GO:1902531	regulation of intracellular signal transduction	1.84163	1.12057
GO:0032101	regulation of response to external stimulus	1.84036	2.01328
GO:0021675	nerve development	1.83908	2.75862
GO:0060333	interferon-gamma-mediated signaling pathway	1.83908	5.05747
GO:0030308	negative regulation of cell growth	1.83651	1.79171
GO:0051146	striated muscle cell differentiation	1.83592	2.06541
GO:0006820	anion transport	1.83106	1.23298
GO:0021536	diencephalon development	1.82692	8.46154
GO:0019827	stem cell maintenance	1.82456	2.10526
GO:0023014	signal transduction by phosphorylation	1.8239	1.13208
GO:0030879	mammary gland development	1.82195	1.98758
GO:0055080	cation homeostasis	1.82089	1.62579
GO:0009967	positive regulation of signal transduction	1.82029	1.39073
GO:0061061	muscle structure development	1.81796	1.8018
GO:0032200	telomere organization	1.81488	5.92862
GO:0043085	positive regulation of catalytic activity	1.80329	1.4926
GO:0001649	osteoblast differentiation	1.8018	2.01802
GO:0043549	regulation of kinase activity	1.79791	1.30224
GO:0001942	hair follicle development	1.79487	1.02564
GO:0001952	regulation of cell-matrix adhesion	1.79487	2.05128
GO:0022404	molting cycle process	1.79487	1.02564
GO:0022405	hair cycle process	1.79487	1.02564
GO:0001654	eye development	1.78989	1.53189
GO:0044093	positive regulation of molecular function	1.78856	1.54492
GO:0071900	regulation of protein serine/threonine kinase activity	1.78592	1.6419
GO:0043408	regulation of MAPK cascade	1.78516	1.51495
GO:0042886	amide transport	1.78253	1.78253
GO:2000106	regulation of leukocyte apoptotic process	1.78253	1.78253
GO:0008064	regulation of actin polymerization or depolymerization	1.77712	3.25805
GO:0030832	regulation of actin filament length	1.77712	3.25805
GO:0032880	regulation of protein localization	1.77604	2.05188
GO:0043154	negative regulation of cysteine-type endopeptidase activity involved in apoptotic process	1.77305	1.77305
GO:0072527	pyrimidine-containing compound metabolic process	1.77305	1.95036
GO:0071902	positive regulation of protein serine/threonine kinase activity	1.77159	1.56519
GO:0010638	positive regulation of organelle organization	1.75996	1.57059
GO:1902533	positive regulation of intracellular signal transduction	1.75927	1.59986
GO:0015031	protein transport	1.75867	3.43328
GO:0001503	ossification	1.75804	2.47513
GO:0033157	regulation of intracellular protein transport	1.75606	1.5868
GO:0038123	toll-like receptor TLR1:TLR2 signaling pathway	1.75439	3.13283
GO:0038124	toll-like receptor TLR6:TLR2 signaling pathway	1.75439	3.13283
GO:0051241	negative regulation of multicellular organismal process	1.75392	2.88143
GO:0001568	blood vessel development	1.75332	1.87452
GO:0031960	response to corticosteroid	1.75084	4.17509
GO:0051099	positive regulation of binding	1.75084	3.90573
GO:0044724	single-organism carbohydrate catabolic process	1.75038	6.77322
GO:0045785	positive regulation of cell adhesion	1.75038	2.1309
GO:0009581	detection of external stimulus	1.74863	1.42077
GO:0006897	endocytosis	1.74632	1.79534
GO:0009719	response to endogenous stimulus	1.74466	1.61586
GO:0033993	response to lipid	1.74359	2.28317
GO:0007219	Notch signaling pathway	1.74258	1.66337
GO:0060828	regulation of canonical Wnt signaling pathway	1.73647	1.68539
GO:0001523	retinoid metabolic process	1.7316	0.865801
GO:0032873	negative regulation of stress-activated MAPK cascade	1.7316	0.865801
GO:0032881	regulation of polysaccharide metabolic process	1.7316	1.7316
GO:0035329	hippo signaling	1.7316	1.7316
GO:0044275	cellular carbohydrate catabolic process	1.7316	5.19481
GO:0045646	regulation of erythrocyte differentiation	1.7316	2.5974
GO:0050685	positive regulation of mRNA processing	1.7316	0.865801
GO:0060042	retina morphogenesis in camera-type eye	1.7316	1.7316
GO:0070303	negative regulation of stress-activated protein kinase signaling cascade	1.7316	0.865801
GO:0070830	tight junction assembly	1.7316	0
GO:0009725	response to hormone	1.72153	1.75772
GO:0007603	phototransduction, visible light	1.72043	1.72043
GO:0016575	histone deacetylation	1.72043	0.430108
GO:0002064	epithelial cell development	1.71868	1.2664
GO:0007029	endoplasmic reticulum organization	1.7094	1.7094
GO:0038032	termination of G-protein coupled receptor signaling pathway	1.7094	1.7094
GO:0043297	apical junction assembly	1.7094	0.569801
GO:1903034	regulation of response to wounding	1.70915	3.23838
GO:0001570	vasculogenesis	1.70732	3.17073
GO:0030003	cellular cation homeostasis	1.70722	1.97607
GO:0002573	myeloid leukocyte differentiation	1.70697	1.42248
GO:0032851	positive regulation of Rab GTPase activity	1.70697	0
GO:0042327	positive regulation of phosphorylation	1.70641	1.31719
GO:0045184	establishment of protein localization	1.70033	3.21986
GO:0001934	positive regulation of protein phosphorylation	1.69976	1.37203
GO:0034134	toll-like receptor 2 signaling pathway	1.69389	3.02481
GO:0051100	negative regulation of binding	1.69389	3.02481
GO:0010628	positive regulation of gene expression	1.69238	1.42617
GO:0009582	detection of abiotic stimulus	1.69223	1.37493
GO:0006369	termination of RNA polymerase II transcription	1.69133	10.9937
GO:0010810	regulation of cell-substrate adhesion	1.69014	1.77062
GO:0043279	response to alkaloid	1.68831	1.94805
GO:0009743	response to carbohydrate	1.68776	2.59656
GO:0048259	regulation of receptor-mediated endocytosis	1.68067	1.0084
GO:1901216	positive regulation of neuron death	1.68067	1.0084
GO:0043406	positive regulation of MAP kinase activity	1.67076	1.67076
GO:0006303	double-strand break repair via nonhomologous end joining	1.66667	6.66667
GO:0010043	response to zinc ion	1.66667	0
GO:0010623	developmental programmed cell death	1.66667	5
GO:0014065	phosphatidylinositol 3-kinase signaling	1.66667	0
GO:0015813	L-glutamate transport	1.66667	3.33334
GO:0016056	rhodopsin mediated signaling pathway	1.66667	5
GO:0018108	peptidyl-tyrosine phosphorylation	1.66667	0.80247
GO:0021697	cerebellar cortex formation	1.66667	0
GO:0030260	entry into host cell	1.66667	3.33334
GO:0030901	midbrain development	1.66667	5
GO:0032204	regulation of telomere maintenance	1.66667	0
GO:0032400	melanosome localization	1.66667	1.66667
GO:0032570	response to progesterone	1.66667	0
GO:0032649	regulation of interferon-gamma production	1.66667	0
GO:0032890	regulation of organic acid transport	1.66667	1.66667
GO:0035094	response to nicotine	1.66667	1.66667
GO:0042098	T cell proliferation	1.66667	0
GO:0043984	histone H4-K16 acetylation	1.66667	1.66667
GO:0044409	entry into host	1.66667	3.33334
GO:0045747	positive regulation of Notch signaling pathway	1.66667	6.66667
GO:0045879	negative regulation of smoothened signaling pathway	1.66667	5
GO:0046839	phospholipid dephosphorylation	1.66667	1.66667
GO:0048103	somatic stem cell division	1.66667	1.66667
GO:0048753	pigment granule organization	1.66667	1.66667
GO:0048821	erythrocyte development	1.66667	0
GO:0050801	ion homeostasis	1.66667	1.74603
GO:0051353	positive regulation of oxidoreductase activity	1.66667	1.66667
GO:0051806	entry into cell of other organism involved in symbiotic interaction	1.66667	3.33334
GO:0051828	entry into other organism involved in symbiotic interaction	1.66667	3.33334
GO:0051875	pigment granule localization	1.66667	1.66667
GO:0052126	movement in host environment	1.66667	3.33334
GO:0052192	movement in environment of other organism involved in symbiotic interaction	1.66667	3.33334
GO:0061013	regulation of mRNA catabolic process	1.66667	0
GO:0072525	pyridine-containing compound biosynthetic process	1.66667	0
GO:0090004	positive regulation of establishment of protein localization to plasma membrane	1.66667	1.66667
GO:0016192	vesicle-mediated transport	1.66118	1.29141
GO:0006873	cellular ion homeostasis	1.6564	2.29841
GO:0034142	toll-like receptor 4 signaling pathway	1.65632	3.147
GO:0018212	peptidyl-tyrosine modification	1.64561	0.764032
GO:0034622	cellular macromolecular complex assembly	1.64484	3.32337
GO:0010243	response to organonitrogen compound	1.63655	1.4388
GO:0002755	MyD88-dependent toll-like receptor signaling pathway	1.63647	3.03916
GO:0034162	toll-like receptor 9 signaling pathway	1.63647	1.98714
GO:2000117	negative regulation of cysteine-type endopeptidase activity	1.63265	1.63265
GO:0051338	regulation of transferase activity	1.62999	1.5285
GO:0050851	antigen receptor-mediated signaling pathway	1.62907	2.25564
GO:0000245	spliceosomal complex assembly	1.62602	6.50407
GO:0042303	molting cycle	1.62602	2.09059
GO:0042439	ethanolamine-containing compound metabolic process	1.62602	0.929153
GO:0042633	hair cycle	1.62602	2.09059
GO:0045637	regulation of myeloid cell differentiation	1.62602	1.3249
GO:0002263	cell activation involved in immune response	1.61943	2.69906
GO:0002366	leukocyte activation involved in immune response	1.61943	2.69906
GO:0016052	carbohydrate catabolic process	1.61404	6.24562
GO:0046907	intracellular transport	1.61311	4.0178
GO:0046324	regulation of glucose import	1.6129	0.806452
GO:0046460	neutral lipid biosynthetic process	1.6129	0.403226
GO:0046463	acylglycerol biosynthetic process	1.6129	0.403226
GO:0048332	mesoderm morphogenesis	1.6129	0.806452
GO:0051347	positive regulation of transferase activity	1.61145	1.51396
GO:0007369	gastrulation	1.60966	1.04628
GO:0046488	phosphatidylinositol metabolic process	1.60385	0.534617
GO:0016570	histone modification	1.59968	0.757053
GO:0090316	positive regulation of intracellular protein transport	1.59817	1.36986
GO:0042471	ear morphogenesis	1.59575	2.48227
GO:0055002	striated muscle cell development	1.59575	3.90071
GO:0019884	antigen processing and presentation of exogenous antigen	1.5949	5.03532
GO:0042325	regulation of phosphorylation	1.59395	1.22559
GO:0002819	regulation of adaptive immune response	1.5873	2.53968
GO:0006721	terpenoid metabolic process	1.5873	1.0582
GO:0030833	regulation of actin filament polymerization	1.58646	2.9614
GO:0006376	mRNA splice site selection	1.58103	6.32411
GO:0009069	serine family amino acid metabolic process	1.58103	2.37154
GO:1901983	regulation of protein acetylation	1.58103	4.74309
GO:2000756	regulation of peptidyl-lysine acetylation	1.58103	4.74309
GO:0001932	regulation of protein phosphorylation	1.57585	1.26616
GO:0048646	anatomical structure formation involved in morphogenesis	1.57199	1.24241
GO:0034341	response to interferon-gamma	1.56863	7.68628
GO:0045893	positive regulation of transcription, DNA-templated	1.56804	1.41346
GO:0045935	positive regulation of nucleobase-containing compound metabolic process	1.56739	1.41945
GO:1901698	response to nitrogen compound	1.562	1.44215
GO:0016569	covalent chromatin modification	1.56145	0.745382
GO:0032944	regulation of mononuclear cell proliferation	1.55844	1.2987
GO:0050670	regulation of lymphocyte proliferation	1.55844	1.2987
GO:0051260	protein homooligomerization	1.55021	0.681151
GO:0042127	regulation of cell proliferation	1.54886	1.67926
GO:0040029	regulation of gene expression, epigenetic	1.54867	1.23262
GO:0016568	chromatin modification	1.5448	1.04623
GO:0019216	regulation of lipid metabolic process	1.54451	0.975478
GO:0045926	negative regulation of growth	1.54451	1.70709
GO:0006470	protein dephosphorylation	1.5444	0.579151
GO:0045892	negative regulation of transcription, DNA-templated	1.5401	1.6506
GO:0043434	response to peptide hormone	1.54003	1.20249
GO:0042472	inner ear morphogenesis	1.53846	1.53846
GO:0045766	positive regulation of angiogenesis	1.53846	1.53846
GO:0010648	negative regulation of cell communication	1.53733	1.1677
GO:0051173	positive regulation of nitrogen compound metabolic process	1.53716	1.46513
GO:0050684	regulation of mRNA processing	1.5361	3.58423
GO:0031647	regulation of protein stability	1.53535	1.9394
GO:0043405	regulation of MAP kinase activity	1.53363	1.54896
GO:0023057	negative regulation of signaling	1.5335	1.17667
GO:0034138	toll-like receptor 3 signaling pathway	1.53006	2.51366
GO:1901700	response to oxygen-containing compound	1.52691	1.76482
GO:0048584	positive regulation of response to stimulus	1.52458	1.54866
GO:0010942	positive regulation of cell death	1.52356	1.99071
GO:0031327	negative regulation of cellular biosynthetic process	1.52351	1.49328
GO:0045765	regulation of angiogenesis	1.52207	1.29376
GO:1902679	negative regulation of RNA biosynthetic process	1.52127	1.62188
GO:0090101	negative regulation of transmembrane receptor protein serine/threonine kinase signaling pathway	1.51958	2.45471
GO:2001237	negative regulation of extrinsic apoptotic signaling pathway	1.51958	1.75336
GO:0051091	positive regulation of sequence-specific DNA binding transcription factor activity	1.51707	2.59166
GO:0016310	phosphorylation	1.51536	1.04462
GO:0006476	protein deacetylation	1.51515	0.378788
GO:0030509	BMP signaling pathway	1.51515	0
GO:0046822	regulation of nucleocytoplasmic transport	1.51515	1.34986
GO:0009890	negative regulation of biosynthetic process	1.50835	1.52267
GO:0050730	regulation of peptidyl-tyrosine phosphorylation	1.50557	2.16802
GO:0009895	negative regulation of catabolic process	1.50376	1.57211
GO:0002478	antigen processing and presentation of exogenous peptide antigen	1.50323	5.14387
GO:0046887	positive regulation of hormone secretion	1.5015	3.30331
GO:0070301	cellular response to hydrogen peroxide	1.5015	6.00601
GO:0051254	positive regulation of RNA metabolic process	1.49253	1.38105
GO:0016579	protein deubiquitination	1.49184	0.559441
GO:0070201	regulation of establishment of protein localization	1.49068	1.97252
GO:0006461	protein complex assembly	1.48613	1.7466
GO:0000187	activation of MAPK activity	1.48093	1.48093
GO:0043065	positive regulation of apoptotic process	1.48065	2.01393
GO:0007286	spermatid development	1.48011	0.370028
GO:0023021	termination of signal transduction	1.47783	2.46306
GO:0046470	phosphatidylcholine metabolic process	1.47783	0.985222
GO:0097581	lamellipodium organization	1.47783	0
GO:0006259	DNA metabolic process	1.47453	2.61663
GO:0002709	regulation of T cell mediated immunity	1.47059	1.47059
GO:0006309	apoptotic DNA fragmentation	1.47059	2.94118
GO:0010799	regulation of peptidyl-threonine phosphorylation	1.47059	1.47059
GO:0010824	regulation of centrosome duplication	1.47059	2.94118
GO:0015800	acidic amino acid transport	1.47059	2.94118
GO:0021522	spinal cord motor neuron differentiation	1.47059	0
GO:0030201	heparan sulfate proteoglycan metabolic process	1.47059	0
GO:0031341	regulation of cell killing	1.47059	1.47059
GO:0031529	ruffle organization	1.47059	1.47059
GO:0032651	regulation of interleukin-1 beta production	1.47059	4.41177
GO:0048286	lung alveolus development	1.47059	1.47059
GO:0071621	granulocyte chemotaxis	1.47059	7.35295
GO:0090342	regulation of cell aging	1.47059	2.94118
GO:0097530	granulocyte migration	1.47059	7.35295
GO:0000122	negative regulation of transcription from RNA polymerase II promoter	1.46962	1.63112
GO:1901652	response to peptide	1.46924	1.14928
GO:0009266	response to temperature stimulus	1.46893	1.35593
GO:0070271	protein complex biogenesis	1.46721	1.73335
GO:0010629	negative regulation of gene expression	1.46637	1.56753
GO:0071310	cellular response to organic substance	1.4659	1.57797
GO:0006892	post-Golgi vesicle-mediated transport	1.4652	1.5318
GO:0043068	positive regulation of programmed cell death	1.46364	1.9824
GO:0051172	negative regulation of nitrogen compound metabolic process	1.4572	1.69239
GO:0031328	positive regulation of cellular biosynthetic process	1.45677	1.49795
GO:0007050	cell cycle arrest	1.45631	0.784168
GO:0008285	negative regulation of cell proliferation	1.45628	1.64713
GO:1901342	regulation of vasculature development	1.4557	1.39241
GO:0043086	negative regulation of catalytic activity	1.45441	1.57902
GO:0002521	leukocyte differentiation	1.45386	1.23262
GO:0070663	regulation of leukocyte proliferation	1.45191	1.69389
GO:0006325	chromatin organization	1.45111	1.28028
GO:0051348	negative regulation of transferase activity	1.45076	2.5431
GO:0003006	developmental process involved in reproduction	1.44939	1.29725
GO:0007492	endoderm development	1.44928	2.89855
GO:0010812	negative regulation of cell-substrate adhesion	1.44928	1.44928
GO:0021517	ventral spinal cord development	1.44928	0.724638
GO:0046686	response to cadmium ion	1.44928	2.17391
GO:0060113	inner ear receptor cell differentiation	1.44928	2.89855
GO:0051606	detection of stimulus	1.44347	1.87116
GO:1902680	positive regulation of RNA biosynthetic process	1.44336	1.40473
GO:0044092	negative regulation of molecular function	1.44328	1.63835
GO:0051253	negative regulation of RNA metabolic process	1.43587	1.82024
GO:0009891	positive regulation of biosynthetic process	1.43307	1.52254
GO:0048545	response to steroid hormone	1.43301	2.7864
GO:0045934	negative regulation of nucleobase-containing compound metabolic process	1.43224	1.71266
GO:0006639	acylglycerol metabolic process	1.42857	0.909091
GO:0032313	regulation of Rab GTPase activity	1.42857	0.12987
GO:0032483	regulation of Rab protein signal transduction	1.42857	0.12987
GO:0009628	response to abiotic stimulus	1.42838	1.3866
GO:0071804	cellular potassium ion transport	1.42248	1.13798
GO:0071805	potassium ion transmembrane transport	1.42248	1.13798
GO:0045321	leukocyte activation	1.42152	1.76568
GO:0006304	DNA modification	1.41844	1.06383
GO:0048514	blood vessel morphogenesis	1.41364	1.87693
GO:0006357	regulation of transcription from RNA polymerase II promoter	1.41249	1.32787
GO:2000113	negative regulation of cellular macromolecule biosynthetic process	1.41003	1.53239
GO:0016567	protein ubiquitination	1.40956	1.05385
GO:0031398	positive regulation of protein ubiquitination	1.40351	4.51564
GO:0015672	monovalent inorganic cation transport	1.40079	6.03836
GO:0002768	immune response-regulating cell surface receptor signaling pathway	1.39963	2.71332
GO:0007254	JNK cascade	1.39762	2.2362
GO:0042493	response to drug	1.39616	1.73429
GO:0010923	negative regulation of phosphatase activity	1.39373	0.464576
GO:0071346	cellular response to interferon-gamma	1.39373	5.8072
GO:0051223	regulation of protein transport	1.39237	1.53718
GO:0010558	negative regulation of macromolecule biosynthetic process	1.38755	1.50968
GO:0019725	cellular homeostasis	1.38376	2.00239
GO:0048585	negative regulation of response to stimulus	1.38212	1.24994
GO:0001707	mesoderm formation	1.37931	0.45977
GO:0030048	actin filament-based movement	1.37931	2.29885
GO:0031032	actomyosin structure organization	1.37931	4.13793
GO:0031060	regulation of histone methylation	1.37931	0.45977
GO:0006638	neutral lipid metabolic process	1.37845	0.877194
GO:0001818	negative regulation of cytokine production	1.37493	3.80751
GO:0032388	positive regulation of intracellular transport	1.37457	1.11684
GO:1902105	regulation of leukocyte differentiation	1.36986	0.989346
GO:0018393	internal peptidyl-lysine acetylation	1.36799	0.547196
GO:0042110	T cell activation	1.36799	1.36799
GO:0008286	insulin receptor signaling pathway	1.36781	1.10092
GO:0031399	regulation of protein modification process	1.36728	1.39929
GO:0051249	regulation of lymphocyte activation	1.36479	1.06408
GO:0045807	positive regulation of endocytosis	1.36055	2.55102
GO:0010557	positive regulation of macromolecule biosynthetic process	1.35995	1.42129
GO:0001525	angiogenesis	1.35851	1.4584
GO:0006909	phagocytosis	1.35841	3.1348
GO:0006997	nucleus organization	1.35803	2.09877
GO:0006641	triglyceride metabolic process	1.35747	0.904978
GO:0048515	spermatid differentiation	1.35747	0.603319
GO:0019751	polyol metabolic process	1.35593	1.35593
GO:0048002	antigen processing and presentation of peptide antigen	1.35544	4.79617
GO:0032355	response to estradiol	1.35266	2.70532
GO:0009408	response to heat	1.34953	2.15925
GO:0031401	positive regulation of protein modification process	1.34696	1.43034
GO:0050821	protein stabilization	1.34615	2.88462
GO:0008593	regulation of Notch signaling pathway	1.34454	3.36135
GO:0009584	detection of visible light	1.34454	1.68067
GO:0010466	negative regulation of peptidase activity	1.34454	1.51261
GO:0010951	negative regulation of endopeptidase activity	1.34454	1.51261
GO:0048641	regulation of skeletal muscle tissue development	1.34454	1.34454
GO:0002429	immune response-activating cell surface receptor signaling pathway	1.34429	3.77147
GO:0009968	negative regulation of signal transduction	1.34016	1.19548
GO:0001541	ovarian follicle development	1.33333	1.33333
GO:0007131	reciprocal meiotic recombination	1.33333	1.33333
GO:0035825	reciprocal DNA recombination	1.33333	1.33333
GO:0043113	receptor clustering	1.33333	0.666667
GO:0050999	regulation of nitric-oxide synthase activity	1.33333	4.66667
GO:0009636	response to toxic substance	1.33284	1.40689
GO:0015718	monocarboxylic acid transport	1.3289	1.55039
[truncated: 1,624 more rows]
