# Supplementary material for: Coexpression enrichment analysis at the single-cell level reveals convergent defects in neural progenitor cells and their cell-type transitions in neurodevelopmental disorders
Source: HighWire-hosted journal article supplement (doi:10.1101/gr.254987.119), 2020-06-01
Supplement: Supplemental_Table_S2.xlsx [file Supplemental_Table_S2.xlsx]

## Sheet: Supplemental Table S2
Supplemental Table S2. Expression change of ASD genes with dnLoF mutations and epilepsy genes with dnMis mutations during the transition from vRG cells to IPCs at GW10.
Column "dnLoF-ASD": 3+=at least three dnLoF mutations, 2=two dnLoF mutations, 1=only one dnLoF mutation, and 0=no dnLoF mutation.
Column "dnMis-Epi": 2+=at least two dnMis mutations, 1=only one dnMis mutation, and 0=no dnMis mutation.
Gene ID	Symbol	Average expression (vRG)	Average expression (IPCs)	log2(fold change, IPCs/vRG)	dnLoF-ASD	dnMis-Epi
157753	TMEM74	1.08870967741935	47.7541176470588	5.45493394457329	0	0
22869	ZNF510	1.60322580645161	63.986862745098	5.31872619186809	0	0
100289635	ZNF605	1.21064516129032	43.0176470588235	5.15108063582482	0	0
253559	CADM2	1.35645161290323	47.1056862745098	5.11799173248077	0	0
11343	MGLL	1.78354838709677	61.2652941176471	5.10224777862227	0	0
64762	GAREM	1.23774193548387	39.4480392156863	4.99417113759597	1	0
8312	AXIN1	1.47483870967742	45.5749019607843	4.94961045962457	0	0
85440	DOCK7	2.06	62.6417647058824	4.92640861341184	0	0
283149	BCL9L	1.12193548387097	33.0198039215686	4.87926993099716	0	0
286410	ATP11C	1.30354838709677	36.9288235294118	4.82423126107004	0	0
23140	ZZEF1	1.13161290322581	30.5564705882353	4.75502547774145	0	0
414919	C8orf82	1.31258064516129	33.7382352941177	4.68390654423477	0	0
6503	SLA	3.32290322580645	84.043137254902	4.66061383493778	0	0
221656	KDM1B	1.02967741935484	25.1358823529412	4.60948399213559	1	0
221710	SMIM13	1.46612903225807	35.5558823529412	4.60000427452896	0	0
26974	ZNF285	1.18903225806452	28.7525490196078	4.59583010138595	0	0
3133	HLA-E	1.37225806451613	32.8654901960784	4.58194978041469	0	0
317781	DDX51	2.13612903225806	51.1452941176471	4.58153080324996	0	0
23143	LRCH1	1.55709677419355	36.7847058823529	4.56217553972304	0	0
9841	ZBTB24	1	23.4794117647059	4.55332435960568	0	0
9732	DOCK4	1.25225806451613	29.3088235294118	4.54873125103666	0	0
1119	CHKA	1.88129032258064	43.4950980392157	4.53105840701642	0	0
6948	TCN2	1.55548387096774	35.8952941176471	4.52835937819827	0	0
107	ADCY1	3.15193548387097	70.7460784313726	4.48834026919212	0	0
54841	BIVM	2.22548387096774	47.5458823529412	4.41712945372274	0	0
25827	FBXL2	1.7841935483871	37.636862745098	4.39880234425489	0	0
64207	IRF2BPL	1.79193548387097	37.4821568627451	4.38661337219798	1	0
10501	SEMA6B	1	20.8498039215686	4.3819619110412	0	0
401647	GOLGA7B	1.30290322580645	26.5609803921569	4.34950656331983	0	0
80854	SETD7	1.41387096774193	28.726862745098	4.34467807656225	0	0
6874	TAF4	1	20.1237254901961	4.33082550980658	1	0
50651	SLC45A1	1.33096774193548	26.7833333333333	4.33078801234169	0	0
4835	NQO2	1.32096774193548	26.5464705882353	4.32885292281471	0	0
59269	HIVEP3	1.61870967741936	32.2780392156863	4.31763678195671	3+	0
1997	ELF1	1.07677419354839	21.198431372549	4.29916986883463	0	0
221833	SP8	1	19.3294117647059	4.27272582881237	0	0
57662	CAMSAP3	1.16322580645161	22.4362745098039	4.26963005335842	0	0
8490	RGS5	1	19.2188235294118	4.26444811985274	0	0
53353	LRP1B	1.02967741935484	19.7025490196078	4.25811794942458	0	0
114790	STK11IP	1.10612903225807	21.0850980392157	4.25263213583384	0	0
9513	FXR2	3.04612903225806	56.2637254901961	4.20715612359302	0	0
23303	KIF13B	1.28709677419355	23.196862745098	4.17173726549291	0	0
8718	TNFRSF25	1.80064516129032	32.1825490196078	4.15969278526697	0	0
101928812	LOC101928812	1.18903225806452	21.0547058823529	4.14628296175334	0	0
285971	ZNF775	1.40838709677419	24.7888235294118	4.13757398320692	0	0
100288911	LOC100288911	1.1841935483871	20.6494117647059	4.12412388044018	0	0
64848	YTHDC2	2.30129032258065	39.7866666666667	4.11177012945414	0	0
23510	KCTD2	1.51967741935484	26.2129411764706	4.10844221616214	0	0
728621	CCDC30	3.44677419354839	59.373137254902	4.10649165410185	0	0
9670	IPO13	2.19193548387097	37.1288235294118	4.08226236181623	0	0
23114	NFASC	2.28161290322581	38.3923529411765	4.0726930300173	0	1
283731	LOC283731	1	16.7492156862745	4.06602163511361	0	0
85446	ZFHX2	1.16322580645161	19.4219607843137	4.06148577199507	0	0
64403	CDH24	1.59096774193548	26.4811764705882	4.05699072835698	0	0
57595	PDZD4	5.02967741935484	82.5233333333333	4.03626431641955	0	0
2743	GLRB	1.60290322580645	25.9545098039216	4.01722600867977	0	0
10752	CHL1	1.66870967741936	26.9525490196078	4.01361684021057	0	0
80003	PCNXL2	1.93774193548387	31.0145098039216	4.00049496927062	0	0
55157	DARS2	2.09258064516129	33.4733333333333	3.99965709585523	0	0
387032	ZKSCAN4	1	15.9694117647059	3.99723926676165	0	0
55330	BLOC1S4	1.35161290322581	21.5360784313725	3.99400163562537	0	0
94235	GNG8	1.28612903225806	20.2286274509804	3.97529113879649	0	0
166655	TRIM60	1.54870967741935	23.9856862745098	3.95303509267347	0	0
285175	UNC80	1	15.4376470588235	3.94838097474418	1	0
5784	PTPN14	1.59354838709677	24.2821568627451	3.92958184325882	0	0
344558	SH3RF3	1.22645161290323	18.6637254901961	3.92767477154427	0	0
80309	SPHKAP	1	15.1425490196078	3.92053617659196	0	0
114794	ELFN2	1.07225806451613	16.1470588235294	3.91254733114611	0	0
11178	LZTS1	10.6293548387097	159.792156862745	3.91007065911838	0	0
10435	CDC42EP2	1.10612903225807	16.6094117647059	3.90840938614636	0	0
100775107	RBM5-AS1	1.19870967741936	17.8211764705882	3.8940383886383	0	0
727957	MROH1	1.41806451612903	20.8903921568627	3.88084449919746	0	0
387104	SOGA3	2.89096774193548	42.5733333333333	3.88032563608331	0	0
4097	MAFG	1.80548387096774	26.5658823529412	3.87911719359237	0	0
10085	EDIL3	2.61935483870968	38.5217647058824	3.87839037842438	0	0
27245	AHDC1	1.88	27.6409803921569	3.87800422026702	1	0
403341	ZBTB34	1.41387096774193	20.7013725490196	3.87200405644783	0	0
65981	CAPRIN2	1.8558064516129	27.1447058823529	3.87055269226291	0	0
26136	TES	1.54709677419355	22.5578431372549	3.86599378302643	0	0
338758	LINC00936	1.48806451612903	21.598431372549	3.85941755568586	0	0
90668	LRRC16B	1.25645161290323	18.1905882352941	3.85576517876828	0	0
23305	ACSL6	1.13129032258064	16.321568627451	3.85073859778527	0	0
5596	MAPK4	1.02967741935484	14.61	3.82669183696803	0	0
56172	ANKH	1.48290322580645	21.0374509803922	3.8264635541509	0	0
1633	DCK	3.76	53.018431372549	3.81768941958868	0	0
284207	METRNL	1.20483870967742	16.9750980392157	3.81650797411229	0	0
4320	MMP11	1.23322580645161	17.3660784313726	3.81576311490398	0	0
124411	ZNF720	1.27838709677419	17.998431372549	3.81547451909936	0	0
23334	SZT2	1	13.9749019607843	3.8047662569407	0	0
7574	ZNF26	1.77903225806452	24.8550980392157	3.8043772184728	0	0
56996	SLC12A9	1.53	21.3221568627451	3.80074982461614	0	0
2888	GRB14	1	13.8798039215686	3.79491528215665	0	0
57786	RBAK	2.66290322580645	36.4823529411765	3.7761268748359	0	1
79693	YRDC	1.67870967741935	22.896862745098	3.76972528673413	0	0
1743	DLST	1	13.6180392156863	3.76744708770517	0	0
3397	ID1	5.1541935483871	70.1888235294118	3.76742270335087	0	0
9935	MAFB	1.54064516129032	20.7772549019608	3.75339853125356	0	0
23231	SEL1L3	1.15225806451613	15.5111764705882	3.75077234402031	0	0
66008	TRAK2	1.02967741935484	13.8217647058824	3.74667748366213	0	0
115827	RAB3C	1.24096774193548	16.4958823529412	3.73256842944434	0	0
10500	SEMA6C	1.78064516129032	23.6070588235294	3.72874635242027	0	0
283212	KLHL35	1	13.1892156862745	3.72128687030582	0	0
23452	ANGPTL2	1.10516129032258	14.4686274509804	3.71059922778801	0	0
339983	NAT8L	2.29741935483871	30.0562745098039	3.70958007225294	0	0
4209	MEF2D	2.37064516129032	30.8590196078431	3.70234058699504	0	0
27031	NPHP3	4.04096774193548	52.1619607843137	3.69022536194748	0	0
51209	RAB9B	1.5658064516129	20.191568627451	3.68877519593211	0	0
138241	C9orf85	1.65161290322581	21.2913725490196	3.68832145633211	0	0
6773	STAT2	3.5158064516129	45.3219607843137	3.68828272238347	0	0
402665	IGLON5	1.80677419354839	23.231568627451	3.68459845228968	0	0
89801	PPP1R3F	1.07225806451613	13.7533333333333	3.68105724878186	0	0
23034	SAMD4A	1.19870967741936	15.3511764705882	3.67879503255128	0	0
6334	SCN8A	1.53290322580645	19.6096078431373	3.67722215876254	0	2+
7273	TTN	1.97935483870968	25.3133333333333	3.67679532578187	0	0
4883	NPR3	1.13161290322581	14.4060784313725	3.67022522652837	0	0
57536	KIAA1328	1.10516129032258	13.8862745098039	3.65133075560966	0	0
11282	MGAT4B	1.25225806451613	15.6264705882353	3.64138815878331	0	0
339745	SPOPL	1	12.3750980392157	3.62936804958507	0	0
3912	LAMB1	1.74612903225806	21.4796078431373	3.62073557636874	0	0
202243	CCDC125	1.02967741935484	12.5233333333333	3.60435427408514	0	1
284439	SLC25A42	1.02967741935484	12.5190196078431	3.60385724487637	0	0
54834	GDAP2	1.22258064516129	14.8411764705882	3.60160392194174	0	0
653319	KIAA0895L	2.24677419354839	27.0101960784314	3.58757707057841	0	0
124637	CYB5D1	1.22645161290323	14.7170588235294	3.58492715871652	0	0
1389	CREBL2	1.08870967741935	13.0392156862745	3.5821659017531	0	0
9331	B4GALT6	1	11.9739215686275	3.58182382035574	0	0
79703	C11orf80	1.63387096774194	19.5590196078431	3.58146809864699	0	0
221264	AK9	3.31064516129032	39.4149019607843	3.57355689159307	0	0
1646	AKR1C2	1.70741935483871	20.2766666666667	3.56993115990285	0	0
23025	UNC13A	1.60645161290323	19.0749019607843	3.56972621015706	0	0
79827	CLMP	1.26612903225806	14.9972549019608	3.56620211032002	0	0
1942	EFNA1	3.00322580645161	35.2711764705882	3.55390484028295	0	0
155061	ZNF746	1.62451612903226	19.0762745098039	3.55369747587328	0	0
57451	TENM2	1.78870967741936	21.0037254901961	3.55365409548822	0	0
9532	BAG2	1.65774193548387	19.4350980392157	3.55137304353005	0	0
118881	COMTD1	1.65645161290323	19.4096078431373	3.55060300359635	0	0
862	RUNX1T1	14.2145161290323	166.502549019608	3.55010736923433	0	0
2335	FN1	4.60935483870968	53.9723529411765	3.54958384437535	0	0
9860	LRIG2	2.06516129032258	24.0994117647059	3.544671566079	0	0
1746	DLX2	1.48870967741935	17.3609803921569	3.54371408304969	0	0
6461	SHB	4.82677419354839	56.2233333333333	3.54203774861824	0	0
1428	CRYM	1.35741935483871	15.7833333333333	3.53946353072916	0	0
283643	C14orf80	1.98354838709677	23.0278431372549	3.5372237935135	0	0
92558	CCDC64	1.1941935483871	13.8621568627451	3.53704316421872	0	0
9139	CBFA2T2	7.27548387096774	84.3849019607843	3.53586979114641	0	0
154661	RUNDC3B	1.55709677419355	18.0525490196078	3.53527204361468	1	0
23228	PLCL2	1.93129032258065	22.3358823529412	3.5317262878954	0	0
777	CACNA1E	7.3941935483871	85.4113725490196	3.52996346517599	0	1
22893	BAHD1	2.1658064516129	24.9490196078431	3.52600689814471	0	0
23387	SIK3	2.26870967741935	26.1174509803922	3.52507019220896	1	0
10817	FRS3	1.43612903225806	16.5213725490196	3.52407626447697	0	0
57578	UNC79	1.64129032258065	18.8056862745098	3.51826659526626	1	0
84236	RHBDD1	1.49806451612903	17.0933333333333	3.51226209941889	0	0
8728	ADAM19	1.36548387096774	15.4950980392157	3.50432770477618	0	0
339327	ZNF546	1.33290322580645	15.0480392156863	3.49693156987339	0	0
57010	CABP4	2.16677419354839	24.3143137254902	3.48818515338065	0	0
6752	SSTR2	5.03806451612903	56.3821568627451	3.48429716624827	0	0
30011	SH3KBP1	1.77774193548387	19.6998039215686	3.4700634533657	0	0
7189	TRAF6	1.07677419354839	11.9170588235294	3.4682405726704	0	0
84456	L3MBTL3	1.21	13.3535294117647	3.46414215198848	0	0
116843	SLC18B1	1.74612903225806	19.2490196078431	3.46255289058749	0	0
118433	RPL23AP7	1.42741935483871	15.7180392156863	3.46094011157645	0	0
30811	HUNK	3.79064516129032	41.6421568627451	3.45752947658979	0	0
100874375	FAM155A-IT1	1	10.9213725490196	3.44908227396833	0	0
54862	CC2D1A	1.30903225806452	14.251568627451	3.44454816642908	1	0
127396	ZNF684	1	10.8770588235294	3.4432165968484	0	0
64744	SMAP2	2.60870967741935	28.26	3.43735316460361	1	0
345630	FBLL1	4.43483870967742	47.9005882352941	3.43308983152603	0	0
57535	KIAA1324	1.67677419354839	18.0821568627451	3.43080645109952	0	0
2172	FABP6	4.39967741935484	47.3682352941176	3.42845026969333	0	0
22898	DENND3	1	10.7652941176471	3.42831583067438	0	0
91433	RCCD1	1.72451612903226	18.5511764705882	3.42724715477128	0	0
84867	PTPN5	2.35161290322581	25.2945098039216	3.42710177647801	0	0
1008	CDH10	1.15161290322581	12.386862745098	3.42708307452224	1	0
440730	TRIM67	1	10.751568627451	3.42647525572068	0	0
538	ATP7A	1	10.7464705882353	3.42579101508284	0	0
57701	NCKAP5L	1.21516129032258	13.0260784313725	3.4221830955314	0	0
114819	CROCCP3	2.26967741935484	24.303137254902	3.4205833887308	0	0
78999	LRFN4	5.71161290322581	60.9417647058824	3.41546116600525	0	0
114781	BTBD9	1.72806451612903	18.4260784313725	3.41452007338168	1	0
10253	SPRY2	1.07225806451613	11.4019607843137	3.41055787289298	1	0
84131	CEP78	2.93967741935484	31.24	3.40966469637714	0	0
54206	ERRFI1	1.4958064516129	15.8645098039216	3.40680752791283	0	0
221914	GPC2	2.89225806451613	30.6603921568627	3.40610796067412	0	0
146713	RBFOX3	3.17709677419355	33.6727450980392	3.40580039832147	0	0
1739	DLG1	5.31322580645161	55.7249019607843	3.39066224105891	0	0
387841	RPL13AP20	2.52870967741935	26.4323529411765	3.38583154076571	0	0
10439	OLFM1	6.73677419354839	70.2519607843137	3.38240864428482	0	0
55191	NADSYN1	2.32935483870968	24.0966666666667	3.37083125762507	0	0
23632	CA14	1	10.3349019607843	3.36945279798443	0	0
3306	HSPA2	1.27935483870968	13.2192156862745	3.36914821518092	0	0
93622	LOC93622	1.84064516129032	19.0074509803922	3.36828163387972	0	0
26205	GMEB2	1.16548387096774	12.0109803921569	3.36535297095449	0	0
54753	ZNF853	1.4	14.4217647058824	3.36474897714006	1	0
6484	ST3GAL4	1.60806451612903	16.5007843137255	3.35913740590905	0	0
205147	AMER3	1.28870967741935	13.2019607843137	3.35675302497829	0	0
8140	SLC7A5	2.7541935483871	28.1535294117647	3.35361394206672	0	0
79805	VASH2	2.98387096774194	30.4656862745098	3.35192818383891	0	0
387509	GPR153	7.76	79.1409803921569	3.35029637988744	0	0
222008	VSTM2A	1	10.1066666666667	3.33723534767521	0	0
23329	TBC1D30	1.48774193548387	15.0174509803922	3.33544375205828	0	0
115704	EVI5L	1.10516129032258	11.1325490196078	3.33245512333409	0	0
1993	ELAVL2	10.7416129032258	108.157647058824	3.33185312953907	1	0
9024	BRSK2	8.31387096774194	83.4419607843137	3.32718079737851	1	0
145581	LRFN5	1	10.0078431372549	3.32305917690601	0	0
6281	S100A10	2.7258064516129	27.2176470588235	3.31978732153229	0	0
149175	MANEAL	1.86806451612903	18.6470588235294	3.31933190756091	0	0
54769	DIRAS2	1.09322580645161	10.9011764705882	3.31782051468581	0	0
57617	VPS18	1.6558064516129	16.4878431372549	3.31579673431989	0	0
151556	GPR155	7.35322580645161	73.1833333333333	3.3150659349275	0	0
267002	PGBD2	1	9.92490196078431	3.31105285123405	0	0
144108	SPTY2D1	1.28516129032258	12.7007843137255	3.30489625372509	0	0
6310	ATXN1	1.10516129032258	10.9	3.30199929396716	0	0
5566	PRKACA	2.90096774193548	28.6105882352941	3.30194300154134	0	0
113000	RPUSD1	1.89096774193548	18.6311764705882	3.30052211887699	0	0
2733	GLE1	2.76032258064516	27.1366666666667	3.2973347379508	0	0
257397	TAB3	1.10193548387097	10.7266666666667	3.28309016076867	0	0
3709	ITPR2	1.31258064516129	12.7727450980392	3.28259065006072	0	0
23365	ARHGEF12	4.9158064516129	47.4645098039216	3.27134916440811	0	0
158866	ZDHHC15	4.12935483870968	39.608431372549	3.26181926591186	0	0
25902	MTHFD1L	1.58290322580645	15.1794117647059	3.26147092323972	0	0
154807	VKORC1L1	5.35645161290323	51.3333333333333	3.26054643774527	0	0
55072	RNF31	1.34129032258064	12.8262745098039	3.25740874157973	0	0
57168	ASPHD2	1.73709677419355	16.5343137254902	3.25071313177666	0	0
83852	SETDB2	1.60870967741935	15.2545098039216	3.24525992775836	0	0
100316904	SAP25	1.1841935483871	11.2158823529412	3.24356631758975	0	0
79133	NDUFAF5	3.40032258064516	32.1850980392157	3.24264934038601	0	0
26207	PITPNC1	1.19483870967742	11.2786274509804	3.23870372188828	0	0
4856	NOV	1	9.4021568627451	3.23299175022072	0	0
274	BIN1	3.44709677419355	32.258431372549	3.22622257964081	0	0
29904	EEF2K	1.6841935483871	15.7603921568627	3.22617358470105	0	0
11129	CLASRP	5.24387096774194	49.0325490196078	3.22503567219199	0	0
55114	ARHGAP17	3.27258064516129	30.5670588235294	3.22347709252697	0	0
2002	ELK1	1.31709677419355	12.3	3.22322505838833	0	0
2745	GLRX	10.3896774193548	96.9729411764706	3.22243137948471	0	0
80059	LRRTM4	2.0658064516129	19.258431372549	3.2207132008747	0	0
55262	C7orf43	1	9.31725490196079	3.21990496317585	0	0
4669	NAGLU	1.35032258064516	12.5798039215686	3.21973343423898	0	0
24145	PANX1	1.50258064516129	13.9811764705882	3.21797143476108	0	0
55531	ELMOD1	3.63774193548387	33.8149019607843	3.21654406526001	0	0
283848	CES4A	1.19838709677419	11.1378431372549	3.21630397893835	0	0
56946	C11orf30	4.00193548387097	37.1427450980392	3.21431062953289	1	0
23035	PHLPP2	1.3058064516129	12.1192156862745	3.214283355953	0	0
57699	CPNE5	2.30645161290323	21.3658823529412	3.21156196613398	0	0
1292	COL6A2	1.10193548387097	10.1996078431372	3.21040201962159	0	0
8045	RASSF7	1.83709677419355	16.9982352941176	3.20988544631199	1	0
115201	ATG4A	1	9.24882352941177	3.20926986333401	0	0
164832	LONRF2	2.74032258064516	25.3356862745098	3.20875327103351	0	0
25769	SLC24A2	1.27387096774194	11.7423529411765	3.20443046828021	0	0
56475	RPRM	1.49806451612903	13.7641176470588	3.19974046667745	0	0
56894	AGPAT3	4.14612903225806	37.9074509803922	3.19264452771787	0	1
158586	ZXDB	1	9.13960784313725	3.19213226430975	0	0
129285	PPP1R21	2.15161290322581	19.6321568627451	3.18972823040304	0	0
80816	ASXL3	1.94967741935484	17.7876470588235	3.18956833412195	3+	0
7584	ZNF35	2.83258064516129	25.821568627451	3.18838770911507	0	0
104	ADARB1	2.94322580645161	26.7958823529412	3.18654118660648	0	0
55777	MBD5	1.45741935483871	13.2456862745098	3.18403463301859	1	0
284252	KCTD1	2.82387096774194	25.6507843137255	3.18325686562326	0	0
54455	FBXO42	3.29967741935484	29.7972549019608	3.17478253049078	0	0
7625	ZNF74	3.36870967741935	30.4035294117647	3.17397080510498	0	0
151525	WDSUB1	1.22645161290323	10.9837254901961	3.1628052530183	0	0
8013	NR4A3	1	8.92627450980392	3.15805817448615	0	0
728613	LOC728613	1.41709677419355	12.646862745098	3.15776935686959	0	0
1130	LYST	2.36032258064516	21.0213725490196	3.15480092183157	0	0
91782	CHMP7	8.64612903225806	76.9025490196078	3.15290514683545	0	0
23108	RAP1GAP2	1	8.85411764705882	3.14634854304282	0	0
4094	MAF	1.33548387096774	11.7929411764706	3.14248911607171	0	0
55252	ASXL2	2.97612903225806	26.1982352941176	3.13796065348001	0	0
387254	SLC7A5P2	3.21741935483871	28.3111764705882	3.13739580904776	0	0
26249	KLHL3	1.83193548387097	16.0792156862745	3.13375643492212	0	0
164633	CABP7	2.49225806451613	21.8264705882353	3.13055349349326	0	0
126432	RINL	1.26096774193548	11.0425490196078	3.13046996250161	0	0
81027	TUBB1	1.22032258064516	10.6862745098039	3.13042451680502	0	0
114787	GPRIN1	2.54548387096774	22.2119607843137	3.12532492458813	1	0
57554	LRRC7	1.44548387096774	12.5717647058824	3.12056275980681	0	0
2977	GUCY1A2	7.69677419354839	66.9386274509804	3.12051314192575	0	0
90987	ZNF251	1.3158064516129	11.4266666666667	3.1183854119857	0	0
55343	SLC35C1	1	8.67098039215686	3.11619512227516	0	0
92211	CDHR1	1.24	10.7360784313725	3.11405509043218	0	0
347730	LRRTM1	1.34935483870968	11.66	3.11122610094334	0	0
23586	DDX58	1.93774193548387	16.7341176470588	3.11034412943983	0	1
1282	COL4A1	3.09516129032258	26.7123529411765	3.1094205644416	0	2+
80709	AKNA	3.67774193548387	31.6917647058824	3.10721584061562	0	0
55700	MAP7D1	5.85870967741935	50.2952941176471	3.10176855499357	0	0
80739	C6orf25	1.8158064516129	15.5562745098039	3.09881426043814	0	0
57795	BRINP2	1.38387096774194	11.8396078431373	3.09683995882058	0	0
114788	CSMD3	1.1841935483871	10.0860784313726	3.09038854508744	0	0
8451	CUL4A	4.91870967741936	41.8327450980392	3.0882808630245	0	0
3487	IGFBP4	1.14451612903226	9.70333333333333	3.08374263948742	0	0
65065	NBEAL1	1	8.4756862745098	3.08333018768821	0	0
3778	KCNMA1	1	8.46745098039216	3.08192772972063	0	0
23283	CSTF2T	2.66516129032258	22.5192156862745	3.07886183137534	1	0
1690	COCH	1	8.43549019607843	3.07647190762402	0	0
57198	ATP8B2	1.18322580645161	9.97745098039216	3.07594586230321	0	0
57610	RANBP10	1.3841935483871	11.5937254901961	3.06622664109677	0	0
23232	TBC1D12	1	8.37196078431373	3.06556555378084	0	0
100507421	TMEM178B	4.20064516129032	35.1394117647059	3.06440721264384	0	0
10683	DLL3	23.0909677419355	193.145882352941	3.06429037849802	0	0
81839	VANGL1	1	8.36137254901961	3.06373978526419	0	0
1827	RCAN1	4.26709677419355	35.6176470588235	3.06126547841447	0	0
10608	MXD4	5.76483870967742	48.1192156862745	3.06126097824487	0	0
93663	ARHGAP18	1.16322580645161	9.65666666666667	3.05339409750378	0	0
79183	TTPAL	3.24032258064516	26.896862745098	3.05322855781461	0	0
283970	PDXDC2P	1.55967741935484	12.9260784313725	3.0509650712589	0	0
79018	GID4	1.48967741935484	12.3390196078431	3.05015590752458	0	0
6096	RORB	1	8.26529411764706	3.04706615823762	0	0
154881	KCTD7	2.55483870967742	21.0939215686275	3.04552321142385	0	0
80325	ABTB1	1.97161290322581	16.2580392156863	3.04370504014683	0	0
90874	ZNF697	1.35161290322581	11.1311764705882	3.04185214778415	0	0
6794	STK11	3.94	32.4413725490196	3.04156732445801	0	0
6558	SLC12A2	2.18935483870968	18.0225490196078	3.0412253704489	0	0
161823	ADAL	2.2358064516129	18.3813725490196	3.03937728956497	0	0
1124	CHN2	1.26290322580645	10.3825490196078	3.03934468611202	0	0
23119	HIC2	4.26677419354839	35.0435294117647	3.03793041611084	0	0
6468	FBXW4	1.47806451612903	12.1147058823529	3.03497823158748	0	0
2044	EPHA5	10.088064516129	82.5623529411765	3.03283467938914	0	0
65249	ZSWIM4	3.35129032258064	27.4209803921569	3.03249157536361	0	0
3665	IRF7	1	8.17745098039216	3.03165120612009	0	0
84286	TMEM175	1.7141935483871	13.9896078431373	3.02875360398244	0	0
64714	PDIA2	1.19483870967742	9.72176470588235	3.02440233416255	0	0
11173	ADAMTS7	6.02838709677419	48.9970588235294	3.02285118645677	0	0
6456	SH3GL2	6.82193548387097	55.3901960784314	3.02137762924418	0	0
50650	ARHGEF3	1	8.11039215686275	3.01977167388557	0	0
30010	NXPH1	1.55354838709677	12.5911764705882	3.01877400746111	0	0
150291	MORC2-AS1	2.65290322580645	21.4774509803922	3.01717882520422	0	0
2011	MARK2	3.57483870967742	28.9372549019608	3.01697801216841	0	0
55852	TEX2	2.73387096774194	22.101568627451	3.0151317086204	0	0
51490	C9orf114	2.19258064516129	17.723137254902	3.01493219222538	0	0
2819	GPD1	1	8.06725490196078	3.01207784164966	0	0
338699	ANKRD42	1.48774193548387	11.996862745098	3.01146097874435	0	0
10723	SLC12A7	3.85838709677419	31.0898039215686	3.01037172219078	0	0
23030	KDM4B	8.26193548387097	66.5664705882353	3.01024397777025	1	0
599	BCL2L2	1.75290322580645	14.0617647058824	3.00395940414962	0	0
3620	IDO1	3.30709677419355	26.4680392156863	3.00061415395813	0	0
161145	TMEM229B	1.18612903225807	9.46450980392157	2.99626682520792	0	0
646405	TPTE2P1	1	7.97627450980392	2.99571506208287	0	0
50507	NOX4	2.13096774193548	16.9650980392157	2.99298910799368	0	0
8085	KMT2D	2.17451612903226	17.2721568627451	2.98968193598761	0	1
26122	EPC2	3.59806451612903	28.5664705882353	2.98902984049222	0	0
3955	LFNG	2.6758064516129	21.2194117647059	2.98733899224897	0	0
9261	MAPKAPK2	2.47290322580645	19.5917647058824	2.98596966481876	0	0
389073	C2orf80	1.36612903225806	10.8192156862745	2.98543025898351	0	0
284485	RIIAD1	4.26258064516129	33.6582352941176	2.98116050362399	0	0
26468	LHX6	1.10516129032258	8.72607843137255	2.98107650502141	0	0
131096	KCNH8	1.60548387096774	12.6754901960784	2.98096146466576	0	0
100130357	LOC100130357	1.63709677419355	12.9137254901961	2.97969375293819	0	0
401548	SNX30	1.44516129032258	11.3960784313725	2.97923503399061	0	1
3265	HRAS	6.55903225806452	51.7039215686275	2.97871883273616	0	0
55690	PACS1	3.73516129032258	29.3643137254902	2.97482147356381	0	1
1789	DNMT3B	3.41096774193548	26.7556862745098	2.97159251773285	0	0
4661	MYT1	12.558064516129	98.4896078431373	2.97135737706737	0	0
5045	FURIN	1	7.83666666666667	2.97024013315714	0	0
116931	MED12L	1.66129032258065	13.008431372549	2.96907088261525	0	0
200728	TMEM17	2.00548387096774	15.6974509803922	2.9685080386213	0	0
84910	TMEM87B	1.18612903225807	9.28019607843137	2.9678943268965	0	0
8772	FADD	1.18258064516129	9.22627450980392	2.9638096472411	0	0
11059	WWP1	3.05483870967742	23.8303921568627	2.96363457764422	0	0
9265	CYTH3	3.72483870967742	29.0543137254902	2.9635025165479	0	0
440823	MIAT	25.0561290322581	195.387647058824	2.96310380670421	1	0
775	CACNA1C	1.98032258064516	15.43	2.96193070245527	0	1
23403	FBXO46	2.33935483870968	18.1250980392157	2.95380618403556	0	0
23507	LRRC8B	1.2958064516129	10.0376470588235	2.95349897343164	0	0
4208	MEF2C	18.1970967741935	140.87137254902	2.95259825985004	0	1
5519	PPP2R1B	1.39225806451613	10.7694117647059	2.95144089624918	0	0
2066	ERBB4	2.97032258064516	22.9647058823529	2.95072678345455	0	0
3899	AFF3	9.07387096774194	70.1119607843137	2.9498705329637	0	0
144717	FAM109A	1.1358064516129	8.76803921568627	2.94853723916871	0	0
9409	PEX16	4.42290322580645	34.1421568627451	2.94848861945205	0	0
51412	ACTL6B	5.41193548387097	41.5992156862745	2.94233978193412	0	0
3983	ABLIM1	1.94258064516129	14.9311764705882	2.94228144639114	0	0
23150	FRMD4B	14.2974193548387	109.662745098039	2.93924681990927	0	0
5187	PER1	1.09451612903226	8.38764705882353	2.93797294144905	0	0
154743	C7orf60	3.55516129032258	27.203137254902	2.93578612415669	0	0
145407	C14orf37	7.04548387096774	53.901568627451	2.93555656176033	0	0
83636	C19orf12	9.11709677419355	69.7321568627451	2.935177711464	0	0
146691	TOM1L2	1.98258064516129	15.1419607843137	2.933100580394	0	0
5740	PTGIS	2.24322580645161	17.1294117647059	2.93282885249497	0	0
100506603	LOC100506603	4.40064516129032	33.5970588235294	2.93254798892819	0	0
7111	TMOD1	1	7.62941176470588	2.931571828114	0	0
4645	MYO5B	1.85193548387097	14.1194117647059	2.93057423985851	0	0
84925	DIRC2	1.42967741935484	10.8407843137255	2.92270756618872	0	0
55751	TMEM184C	1.19516129032258	9.05274509803922	2.92115000536457	0	0
283596	SNHG10	4.74032258064516	35.7027450980392	2.91297786037455	0	0
148266	ZNF569	3.04548387096774	22.8964705882353	2.91038186003821	0	0
58513	EPS15L1	6.6341935483871	49.8501960784314	2.90960617169896	0	0
92154	MTSS1L	1.15354838709677	8.66294117647059	2.90877840004042	0	0
2649	NR6A1	1.67	12.5360784313725	2.90816610329162	0	0
5553	PRG2	10.998064516129	82.4501960784314	2.90627326982324	0	0
22941	SHANK2	3.72903225806452	27.843137254902	2.90044859519411	2	0
90204	ZSWIM1	1.89741935483871	14.1572549019608	2.89943107948825	0	0
57465	TBC1D24	3.78548387096774	28.2194117647059	2.89813828882426	0	0
23129	PLXND1	2.35354838709677	17.5356862745098	2.89738447371948	0	0
9695	EDEM1	2.66741935483871	19.7817647058824	2.89065457357127	0	0
949	SCARB1	1.69129032258065	12.5413725490196	2.89049901229803	0	0
534	ATP6V1G2	6.19161290322581	45.8852941176471	2.88964467231139	0	0
1442	CSH1	2.64451612903226	19.5692156862745	2.88751025582718	0	0
148156	ZNF558	1.20677419354839	8.92254901960784	2.88630017193168	0	0
10512	SEMA3C	3.64677419354839	26.9349019607843	2.88478403739169	0	0
283131	NEAT1	12.7506451612903	93.8549019607843	2.87986185086096	0	0
56160	NDNL2	2.67548387096774	19.6580392156863	2.87724769088047	0	0
347744	C6orf52	1.34322580645161	9.86843137254902	2.87711892750175	0	0
10981	RAB32	1.85354838709677	13.5990196078431	2.87514096473573	0	0
271	AMPD2	4.83741935483871	35.4825490196078	2.87480013943514	0	0
124401	ANKS3	2.33	17.0852941176471	2.87435322350332	0	0
288	ANK3	42.128064516129	307.180588235294	2.86623350923818	0	1
10370	CITED2	3.16806451612903	23.078431372549	2.86487154755105	0	0
148281	SYT6	4.60193548387097	33.4876470588235	2.86331634840853	0	0
4326	MMP17	3.73032258064516	27.1219607843137	2.86208918356935	0	0
9867	PJA2	22.5058064516129	163.186274509804	2.85815055136034	0	0
170261	ZCCHC12	1.36935483870968	9.9221568627451	2.85715742718759	0	0
9705	ST18	12.0738709677419	87.4445098039216	2.85647951909816	0	0
27147	DENND2A	2.78322580645161	20.1464705882353	2.85569725250081	0	0
101927811	LOC101927811	1	7.22156862745098	2.85231224504088	0	0
134359	POC5	1.96032258064516	14.1376470588235	2.85037904961074	0	0
6855	SYP	3.52967741935484	25.4217647058824	2.84845593623103	0	0
284338	PRR19	1.15354838709677	8.30372549019608	2.84768022993818	0	1
57579	FAM135A	5.43193548387097	39.0152941176471	2.844501526197	0	0
253461	ZBTB38	2.32806451612903	16.7143137254902	2.84388117604924	0	0
283624	LINC00641	2.23032258064516	15.9490196078431	2.83814345050247	0	0
4242	MFNG	12.5474193548387	89.6703921568627	2.8372410335176	0	0
2899	GRIK3	3.45387096774194	24.5292156862745	2.82821501320519	0	0
375057	C1orf95	1	7.08588235294118	2.82494751255793	0	0
353274	ZNF445	11.9738709677419	84.803137254902	2.82422800891106	0	0
54212	SNTG1	1	7.07705882352941	2.82314991082905	0	0
1740	DLG2	3.65129032258065	25.8350980392157	2.82285406804036	0	0
153020	RASGEF1B	4.51225806451613	31.893137254902	2.82132453353034	0	0
91663	MYADM	1.5241935483871	10.7719607843137	2.82116286383503	0	0
55102	ATG2B	1.91483870967742	13.5162745098039	2.81940277486458	0	0
729683	LOC729683	1	7.05372549019608	2.81838543150007	0	0
79469	DLEU2L	4.08322580645161	28.7476470588235	2.81566262164308	0	0
79685	SAP30L	3.04806451612903	21.4427450980392	2.81452426656404	0	0
9846	GAB2	2.04	14.3474509803922	2.81415338798158	0	0
134121	C5orf49	1	7.03294117647059	2.81412815065303	0	0
5609	MAP2K7	5.75096774193548	40.4254901960784	2.81338861723948	0	0
10734	STAG3	1.34741935483871	9.47058823529412	2.81325510886308	0	0
93556	EGFEM1P	2.46451612903226	17.3162745098039	2.81275224858996	0	0
23431	AP4E1	1.63935483870968	11.5135294117647	2.81213008682616	1	0
9435	CHST2	2.14161290322581	15.0092156862745	2.80907894873749	0	0
554235	ASPDH	1.50032258064516	10.5023529411765	2.80736795520422	0	0
7732	RNF112	3.70032258064516	25.8466666666667	2.80425528413232	0	0
1677	DFFB	1.79741935483871	12.5501960784314	2.80371095679673	0	0
192683	SCAMP5	8.21129032258064	57.3076470588235	2.80304681309875	0	0
79870	BAALC	1.36838709677419	9.51450980392157	2.7976529241026	0	0
5533	PPP3CC	3.43322580645161	23.8619607843137	2.79707594407519	0	0
200933	FBXO45	5.92838709677419	41.1852941176471	2.79641773424244	0	0
23508	TTC9	2.24548387096774	15.5721568627451	2.79387051797893	0	0
140901	STK35	4.53677419354839	31.4247058823529	2.79216048179695	0	0
10818	FRS2	1.16548387096774	8.06117647058824	2.79006136578809	0	0
9647	PPM1F	2.29967741935484	15.8919607843137	2.78879372791562	0	0
7324	UBE2E1	5.62193548387097	38.8194117647059	2.78763945401661	0	0
10208	USPL1	3.39322580645161	23.3078431372549	2.78008616213301	0	0
4135	MAP6	16.9977419354839	116.272941176471	2.77410038512826	0	0
81856	ZNF611	2.29838709677419	15.7209803921569	2.77399748600691	0	0
9892	SNAP91	5.12032258064516	35.0105882352941	2.77348469353299	0	0
6457	SH3GL3	1.98612903225806	13.5672549019608	2.77209758787039	0	0
57580	PREX1	9.20096774193548	62.8454901960784	2.77195170585741	0	0
51617	HMP19	31.4422580645161	214.72431372549	2.77170882475536	0	0
84253	GARNL3	2.54451612903226	17.3682352941176	2.77098793460991	0	0
11108	PRDM4	2.89032258064516	19.6770588235294	2.76721217185966	0	0
8847	DLEU2	4.35935483870968	29.6621568627451	2.76643696142281	0	0
163059	ZNF433	1.10516129032258	7.51019607843137	2.76459363861978	0	0
10769	PLK2	5.5058064516129	37.4082352941176	2.76433010926839	0	0
493812	HCG11	4.48129032258065	30.346862745098	2.75956127822246	0	0
84901	NFATC2IP	5.82870967741936	39.4182352941177	2.75761474089046	0	0
57586	SYT13	3.37483870967742	22.7901960784314	2.75552287744296	0	0
29911	HOOK2	1	6.74156862745098	2.75308431659124	0	0
182	JAG1	5.03612903225806	33.9452941176471	2.75282443316377	0	0
91010	FMNL3	1.98	13.3413725490196	2.75233476197464	0	0
147166	TRIM16L	1.84483870967742	12.4254901960784	2.7517361732933	0	0
7182	NR2C2	1.13161290322581	7.61549019607843	2.75055637123051	0	0
23081	KDM4C	1.46161290322581	9.81843137254902	2.74793127751695	0	0
55622	TTC27	1.80741935483871	12.116862745098	2.7450130275224	0	0
83541	FAM110A	5.00290322580645	33.511568627451	2.74382176777767	0	0
5584	PRKCI	6.80129032258065	45.4392156862745	2.74005755141714	0	0
1855	DVL1	4.32	28.8264705882353	2.73829099163277	0	0
85462	FHDC1	1	6.67156862745098	2.7380260095325	0	0
2835	GPR12	5.37677419354839	35.8423529411765	2.73685255938095	0	0
116988	AGAP3	14.2741935483871	95.0798039215686	2.73572968838784	0	0
64860	ARMCX5	1.75193548387097	11.6488235294118	2.7331627046662	0	0
8654	PDE5A	1.37838709677419	9.15921568627451	2.73224296252675	0	0
56122	PCDHB14	2.20935483870968	14.6513725490196	2.72933877358403	0	0
9414	TJP2	4.58225806451613	30.3823529411765	2.72910298669942	0	0
25854	FAM149A	1.02967741935484	6.80529411764706	2.72446507877673	0	0
79796	ALG9	6.81935483870968	45.0254901960784	2.72303482173116	0	0
57715	SEMA4G	1.44774193548387	9.55882352941176	2.72302860621828	0	0
9962	SLC23A2	4.53161290322581	29.82	2.71818372313496	0	0
8193	DPF1	6.52322580645161	42.9219607843137	2.71805850908717	0	0
2717	GLA	6.17838709677419	40.6298039215686	2.71723623355868	0	0
101929570	LOC101929570	4.92064516129032	32.3450980392157	2.71662769625098	0	0
3738	KCNA3	2.25612903225806	14.8298039215686	2.71657803707631	0	0
54869	EPS8L1	1.27935483870968	8.40254901960784	2.71541059202525	0	0
80301	PLEKHO2	1	6.55549019607843	2.71270366404881	0	0
54462	CCSER2	12.8574193548387	84.1582352941176	2.71050334846394	0	0
642597	C18orf42	1.09322580645161	7.14235294117647	2.7078080055033	0	0
3747	KCNC2	2.14838709677419	14.0125490196078	2.70539355305923	0	0
9568	GABBR2	4.44129032258065	28.96	2.70501081542988	0	2+
284613	CYB561D1	3.18064516129032	20.733137254902	2.70454709955741	1	0
785	CACNB4	5.52806451612903	36.0341176470588	2.70451716095351	0	0
85508	SCRT2	8.85806451612903	57.6143137254902	2.70136387000464	0	0
10814	CPLX2	21.2154838709677	137.794901960784	2.6993330249061	0	0
163131	ZNF780B	1	6.48549019607843	2.69721562254548	0	0
747	DAGLA	2.61645161290323	16.9411764705882	2.69485058133491	0	0
166336	PRICKLE2	1.34129032258064	8.67980392156863	2.69404090958408	0	0
90809	TMEM55B	1.63387096774194	10.5709803921569	2.69374322520614	0	0
3631	INPP4A	7.06612903225806	45.7094117647059	2.69349925382999	0	0
129303	TMEM150A	1.33645161290323	8.64254901960784	2.69304927650427	0	0
56901	NDUFA4L2	1.16129032258065	7.4921568627451	2.68965241444322	0	0
643529	LINC00865	1.87870967741936	12.0801960784314	2.68482982665604	0	0
55888	ZKSCAN7	4.19161290322581	26.9437254901961	2.68437195023559	0	0
283987	HID1	4.29290322580645	27.5150980392157	2.68019791331814	0	0
23245	ASTN2	2.08	13.3260784313725	2.67959685632622	0	0
57700	FAM160B1	3.5458064516129	22.6933333333333	2.67808284253358	0	0
8120	AP3B2	4.38709677419355	28.0682352941176	2.67759992561365	0	0
11099	PTPN21	2.99354838709677	19.1374509803922	2.67647018737382	0	0
25909	AHCTF1	4.37032258064516	27.8343137254902	2.67105283653985	0	0
80031	SEMA6D	2.66645161290323	16.9545098039216	2.66867601982132	0	0
60468	BACH2	13.841935483871	87.9927450980392	2.66833889449781	0	0
116986	AGAP2	1.47709677419355	9.38764705882353	2.66799925331455	0	0
149371	EXOC8	1.37096774193548	8.67803921568627	2.66217447989545	0	0
3911	LAMA5	7.75387096774194	49.0462745098039	2.6611549229012	0	0
150244	ZDHHC8P1	6.91709677419355	43.6962745098039	2.6592717367623	0	0
84626	KRBA1	1.24225806451613	7.84098039215686	2.65806914446969	0	0
9839	ZEB2	34.9870967741935	220.607254901961	2.65658537628933	0	0
84804	MFSD9	1	6.29823529411765	2.65494765574512	0	0
84282	RNF135	1.37258064516129	8.62823529411765	2.65217460327488	0	0
5463	POU6F1	4.6458064516129	29.1464705882353	2.64932023824495	0	0
150726	FBXO41	1.31322580645161	8.22352941176471	2.64664270325932	0	0
478	ATP1A3	6.28387096774194	39.2888235294118	2.64439350623994	0	1
9639	ARHGEF10	2.56483870967742	16.0282352941176	2.64367558409399	0	0
4899	NRF1	4.65903225806452	29.0843137254902	2.64213903820233	0	0
55885	LMO3	12.3712903225806	77.2101960784314	2.64179539586938	0	0
63908	NAPB	4.35774193548387	27.1907843137255	2.64146509825128	0	0
111	ADCY5	3.94548387096774	24.5209803921569	2.63574251451996	0	0
84083	ZRANB3	3.01354838709677	18.7139215686275	2.63457677737007	0	0
27445	PCLO	10.9183870967742	67.7023529411765	2.63244622246301	0	0
9890	LPPR4	1.24548387096774	7.70960784313726	2.62995113910974	0	0
5099	PCDH7	1	6.18588235294118	2.62897939559298	0	0
5868	RAB5A	6.50548387096774	40.2307843137255	2.62857159193205	0	0
113115	MTFR2	1	6.18019607843137	2.62765261108969	0	0
90102	PHLDB2	4.30064516129032	26.5641176470588	2.62685378603	0	0
83786	FRMD8	1.92225806451613	11.8723529411765	2.62673194906635	0	0
83886	PRSS27	1.02967741935484	6.35921568627451	2.62665640565993	0	0
147670	SMIM17	2.13161290322581	13.16	2.62614211270267	0	0
9826	ARHGEF11	3.32354838709677	20.4727450980392	2.62290829663625	0	0
1837	DTNA	3.87838709677419	23.8880392156863	2.62275972972027	0	0
8476	CDC42BPA	9.59741935483871	58.983137254902	2.61958412240389	0	0
7673	ZNF222	1.18645161290323	7.28509803921569	2.61829512324035	0	0
60509	AGBL5	2.42225806451613	14.8623529411765	2.6172380536173	0	0
254263	CNIH2	12.2335483870968	74.9749019607843	2.61556480685619	0	0
84725	PLEKHA8	3.13387096774194	19.1772549019608	2.61337853739514	0	0
5465	PPARA	1.02967741935484	6.29450980392157	2.61190159383143	0	0
64793	CEP85	4.65548387096774	28.4441176470588	2.6111273002878	0	0
5291	PIK3CB	3.26903225806452	19.8970588235294	2.60561966936525	0	0
7473	WNT3	1.44903225806452	8.81843137254902	2.60543233897362	0	0
8440	NCK2	10.6448387096774	64.77	2.60517165380395	0	0
84561	SLC12A8	1.31645161290323	7.95666666666667	2.5955096654894	0	0
5362	PLXNA2	16.8196774193548	101.65431372549	2.5954494957346	0	0
116983	ACAP3	12.2464516129032	73.8719607843137	2.59266308012051	0	0
4665	NAB2	2.89032258064516	17.4111764705882	2.59071126707459	0	0
140767	NRSN1	1.18645161290323	7.14411764705882	2.59010257424782	0	0
94107	TMEM203	11.2954838709677	67.9664705882353	2.5890771338641	0	0
399979	SNX19	7.47161290322581	44.9286274509804	2.58814337134829	0	0
154215	NKAIN2	1.15354838709677	6.92725490196078	2.58620524058809	0	0
22881	ANKRD6	3.04387096774194	18.2735294117647	2.5857761997261	0	0
6620	SNCB	2.80258064516129	16.8207843137255	2.58541718389245	0	0
81545	FBXO38	3.00774193548387	17.9819607843137	2.57979764932922	0	0
6446	SGK1	1.65354838709677	9.87960784313726	2.57888851410613	0	0
23285	KIAA1107	1.10516129032258	6.59823529411765	2.57782328963186	0	0
387119	CEP85L	11.3970967741935	68.038431372549	2.57768351202531	0	0
401431	ATP6V0E2-AS1	1.60806451612903	9.59901960784314	2.57756177513376	0	0
89932	PAPLN	3.4141935483871	20.3711764705882	2.5769125496078	0	0
5100	PCDH8	1.09451612903226	6.52588235294118	2.57587976455091	0	0
5033	P4HA1	5.15064516129032	30.6629411764706	2.57367102801701	0	0
123720	WHAMM	1.87193548387097	11.1347058823529	2.57246083206181	0	0
9907	AP5Z1	3.35064516129032	19.9162745098039	2.57143698957399	0	0
219333	USP12	5.41064516129032	32.103137254902	2.56884175522142	0	0
116985	ARAP1	1.7341935483871	10.276862745098	2.56706308730116	0	0
127703	C1orf216	3.00096774193548	17.771568627451	2.56607131179907	0	0
84256	FLYWCH1	3.14806451612903	18.6241176470588	2.56463506406326	0	0
10404	CPQ	1.28290322580645	7.58725490196078	2.56416566077914	0	0
4685	NCAM2	3.06774193548387	18.1154901960784	2.56197481422461	0	0
116842	LEAP2	1.08870967741935	6.42058823529412	2.56008619218913	0	0
57590	WDFY1	4.55903225806452	26.8666666666667	2.55901781569197	0	0
9015	TAF1A	5.24903225806452	30.8686274509804	2.55601796728066	0	0
10178	TENM1	1.1641935483871	6.83509803921569	2.55363110353768	0	0
57631	LRCH2	11.7822580645161	69.1527450980392	2.55317046442817	0	0
54751	FBLIM1	1.05903225806452	6.21274509803922	2.55248432892361	0	0
81544	GDPD5	1.96225806451613	11.5088235294118	2.55215367005269	0	0
8897	MTMR3	6.16774193548387	36.1650980392157	2.55178375481987	0	0
92659	MAFG-AS1	2.74225806451613	16.0788235294118	2.55172560019287	0	0
29956	CERS2	1.42451612903226	8.3343137254902	2.54859145128207	0	0
282969	FUOM	1.43516129032258	8.39176470588235	2.54776134418417	0	0
57189	KIAA1147	10.5825806451613	61.6556862745098	2.54254247232073	0	0
79874	RABEP2	1.56741935483871	9.11686274509804	2.54014623893094	0	0
84100	ARL6	1.56129032258064	9.07823529411765	2.53967304923178	0	0
53346	TM6SF1	1.42645161290323	8.29254901960784	2.53938482556321	0	0
90594	ZNF439	3.50290322580645	20.3511764705882	2.53848916023146	0	0
64319	FBRS	6.92548387096774	40.1794117647059	2.53646966458216	0	0
64282	PAPD5	5.48258064516129	31.8021568627451	2.53619758097689	0	1
340719	NANOS1	3.1541935483871	18.2754901960784	2.53456700856282	0	0
79605	PGBD5	1.16322580645161	6.73862745098039	2.53432358649923	0	0
81926	ABHD17A	2.13064516129032	12.3382352941176	2.53377381321689	0	0
53373	TPCN1	1.54806451612903	8.96333333333333	2.5335697518224	0	0
64395	GMCL1	2.20645161290323	12.7723529411765	2.5332243101496	0	0
728294	D2HGDH	10.6006451612903	61.2901960784314	2.53150424954153	0	0
10675	CSPG5	1.35451612903226	7.81980392156863	2.5293548603161	0	0
79180	EFHD2	1.34935483870968	7.78470588235294	2.52837275070929	0	0
200014	CC2D1B	1.7058064516129	9.83450980392157	2.5273991825582	0	0
84054	PCDHB19P	1.32774193548387	7.64862745098039	2.52622611214162	0	0
285368	PRRT3	1	5.75647058823529	2.52518453640798	0	0
54331	GNG2	27.4529032258065	157.845882352941	2.52348599458996	0	0
320	APBA1	2.44387096774194	14.0513725490196	2.52347104048575	0	0
54468	MIOS	3.85935483870968	22.1760784313725	2.52257266498635	0	0
100996295	DNAH17-AS1	1.5258064516129	8.7643137254902	2.52206915958886	0	0
6482	ST3GAL1	5.93451612903226	34.0703921568627	2.52131624364385	0	0
4008	LMO7	8.93032258064516	51.2692156862745	2.5213086332771	0	0
58509	CACTIN	1.89677419354839	10.8456862745098	2.51550149957626	0	0
84719	LINC00260	3.82709677419355	21.8758823529412	2.51501892110684	0	0
29767	TMOD2	7.75677419354839	44.33	2.51475465324294	0	0
36	ACADSB	2.86451612903226	16.3617647058824	2.51396499304005	0	0
285671	RNF180	2.23838709677419	12.7556862745098	2.51060906381566	0	0
1953	MEGF6	3.18806451612903	18.1619607843137	2.51016723568076	1	0
27242	TNFRSF21	3.36064516129032	19.0678431372549	2.50433153545079	0	0
3177	SLC29A2	2.76193548387097	15.6558823529412	2.50295329475247	0	0
22983	MAST1	12.6774193548387	71.83	2.50232541853727	0	1
4627	MYH9	10.6951612903226	60.458431372549	2.49898530843855	0	0
257194	NEGR1	2.21225806451613	12.498431372549	2.49815544555655	0	0
22853	LMTK2	3.49032258064516	19.7121568627451	2.49765335801007	0	0
7122	CLDN5	14.8851612903226	83.9970588235294	2.49646395828291	0	0
83590	TMUB1	2.17806451612903	12.2676470588235	2.49373997220594	0	0
401207	C5orf63	4.49612903225806	25.3105882352941	2.49298569257171	0	0
8036	SHOC2	8.97387096774194	50.4264705882353	2.49037890754636	0	0
2673	GFPT1	12.6022580645161	70.6735294117647	2.48748770043712	0	0
196441	ZFC3H1	11.1516129032258	62.5060784313726	2.48674410401625	0	0
124925	SEZ6	14.2793548387097	79.9898039215686	2.48588531753128	0	0
51360	MBTPS2	2.1141935483871	11.8405882352941	2.4855613927181	0	0
50853	VILL	2.73161290322581	15.2774509803922	2.4835788930067	0	0
79230	ZNF557	4.4258064516129	24.6896078431373	2.47989165563537	0	0
26512	INTS6	3.32645161290323	18.5405882352941	2.47863106361079	1	0
23426	GRIP1	6.62677419354839	36.9150980392157	2.47783232431328	0	0
3995	FADS3	1.53225806451613	8.49137254901961	2.47033847251476	0	0
283337	ZNF740	2.70387096774194	14.94	2.46608193704549	0	0
2738	GLI4	1.25870967741935	6.95078431372549	2.46523021563048	0	0
869	CBLN1	4.24354838709677	23.4105882352941	2.46381815234182	0	0
653238	GTF2H2B	2.21096774193548	12.1880392156863	2.46271616562491	0	0
10715	CERS1	2.49709677419355	13.7613725490196	2.46230073189124	0	0
9517	SPTLC2	4.45064516129032	24.4901960784314	2.46011793669697	0	0
60680	CELF5	22.9867741935484	126.222352941176	2.45709149494636	0	0
284434	NWD1	1.55645161290323	8.54176470588235	2.45627343071814	0	0
113791	PIK3IP1	1.4358064516129	7.8756862745098	2.45554435778938	0	0
285600	KIAA0825	9.04129032258064	49.4764705882353	2.4521420032639	0	0
5523	PPP2R3A	7.79677419354839	42.5950980392157	2.44973815309518	0	0
6015	RING1	6.03225806451613	32.9501960784314	2.44951699576527	0	0
158798	AKAP14	2.49677419354839	13.5960784313725	2.4450533334738	0	0
816	CAMK2B	8.09612903225807	44.0182352941176	2.44279711994236	0	0
9306	SOCS6	3.57451612903226	19.4272549019608	2.44226219337005	0	0
5800	PTPRO	6.5758064516129	35.7354901960784	2.44211783702895	0	1
6621	SNAPC4	2.24483870967742	12.1819607843137	2.44006266825051	0	0
9392	TGFBRAP1	5.7641935483871	31.216862745098	2.43713487176264	0	0
9690	UBE3C	3.84225806451613	20.8072549019608	2.43706031738342	0	0
1678	TIMM8A	5.06258064516129	27.4039215686274	2.43643747135647	0	0
157627	LINC00599	3.14709677419355	17.0221568627451	2.43532040349744	0	0
1675	CFD	1	5.40450980392157	2.43416376957462	0	0
129563	DIS3L2	5.07225806451613	27.4119607843137	2.43410547481155	0	0
53834	FGFRL1	1.87322580645161	10.121568627451	2.43383617069402	0	0
22854	NTNG1	2.13354838709677	11.5229411764706	2.43318226975712	0	0
57575	PCDH10	1.94322580645161	10.4239215686274	2.42337267435179	0	0
5334	PLCL1	1	5.36372549019608	2.42323540352372	0	0
51291	GMIP	2.27838709677419	12.211568627451	2.42216374637159	0	0
2517	FUCA1	1.40903225806452	7.54980392156863	2.4217345354604	0	0
2898	GRIK2	1.35193548387097	7.23333333333333	2.41963433086694	0	0
4287	ATXN3	12.4196774193548	66.4429411764706	2.41948823492006	0	0
5817	PVR	1.8141935483871	9.69901960784314	2.41851054587484	0	0
6585	SLIT1	11.0825806451613	59.2464705882353	2.41843535213238	0	1
578	BAK1	2.87290322580645	15.3556862745098	2.41819168911635	0	0
100132074	FOXO6	2.2741935483871	12.1452941176471	2.41697048043119	1	0
10391	CORO2B	20.4303225806452	108.651764705882	2.41092771822961	1	0
51409	HEMK1	3.89225806451613	20.6660784313726	2.4085853787902	0	0
23592	LEMD3	7.64032258064516	40.4686274509804	2.40509846243574	0	0
55558	PLXNA3	9.75225806451613	51.6523529411765	2.40502586206517	1	0
729991	MEF2BNB	9.23290322580645	48.8647058823529	2.40393653775689	0	0
79006	METRN	16.4103225806452	86.818431372549	2.40339775789993	0	0
57614	KIAA1468	2.16064516129032	11.4103921568627	2.40081430993368	0	0
54785	C17orf59	4.58935483870968	24.1982352941176	2.39853857769726	0	0
112	ADCY6	5.10516129032258	26.8392156862745	2.39431406590599	0	0
56975	FAM20C	12.0341935483871	63.1925490196078	2.39261499624401	0	0
26256	CABYR	2.48677419354839	13.0547058823529	2.39222253699839	0	0
400579	FLJ35934	1	5.24862745098039	2.39194019829213	0	0
8812	CCNK	4.3858064516129	23.0054901960784	2.39106414591419	0	0
7743	ZNF189	7.83032258064516	41.0682352941176	2.39087930829785	0	0
55213	RCBTB1	5.16870967741936	27.0537254901961	2.38795120252449	1	0
51088	KLHL5	9.83225806451613	51.4592156862745	2.38783478112465	0	0
1804	DPP6	6.65903225806452	34.771568627451	2.38452371783836	0	0
100507297	TMEM44-AS1	1.42741935483871	7.45274509803922	2.38436267713706	0	0
6832	SUPV3L1	8.68161290322581	45.306862745098	2.38369459340885	0	0
90293	KLHL13	6.20354838709677	32.3466666666667	2.38245148136653	0	0
56978	PRDM8	15.5316129032258	80.9670588235294	2.38212741542709	0	0
170506	DHX36	17.3848387096774	90.6072549019608	2.3817968888365	0	0
114798	SLITRK1	4.43161290322581	23.0109803921569	2.37641867738599	0	0
1848	DUSP6	16.2067741935484	84.1458823529412	2.37629571103613	0	0
6900	CNTN2	4.78967741935484	24.8662745098039	2.37618997764768	0	0
55295	KLHL26	1.4141935483871	7.33235294117647	2.37429664855487	0	0
78997	GDAP1L1	19.8393548387097	102.809607843137	2.37353807847285	0	0
54707	GPN2	1.33774193548387	6.93137254901961	2.37334123109354	0	0
30850	CDR2L	1	5.17960784313725	2.37284287316704	0	0
65982	ZSCAN18	14.6606451612903	75.9309803921569	2.37274004323107	0	0
3661	IRF3	4.86387096774194	25.1854901960784	2.37241594951349	0	0
138046	RALYL	2.13	11.0103921568627	2.3699405186869	0	0
84260	TCHP	11.3587096774194	58.7135294117647	2.369894025766	0	0
9726	ZNF646	4.34516129032258	22.4462745098039	2.36899438016731	0	0
6571	SLC18A2	1.43064516129032	7.38176470588235	2.3672998633133	0	0
55208	DCUN1D2	1.40548387096774	7.24392156862745	2.36570402827433	0	0
54492	NEURL1B	8.21677419354839	42.3080392156863	2.36428779942539	0	0
128434	VSTM2L	10.7803225806452	55.2888235294118	2.35858752479711	0	0
10869	USP19	8.71838709677419	44.7041176470588	2.35827455663028	0	0
9213	XPR1	47.7529032258064	244.412745098039	2.35565916537204	0	0
6653	SORL1	2.02032258064516	10.3294117647059	2.35410052995449	0	0
56998	CTNNBIP1	8.45967741935484	43.1976470588235	2.35227817478444	0	0
51542	VPS54	2.17612903225806	11.1047058823529	2.35133517440784	0	0
3321	IGSF3	12.6154838709677	64.3650980392157	2.35108305687332	1	0
100507577	LOC100507577	1.71064516129032	8.72607843137255	2.35079290796466	0	0
535	ATP6V0A1	15.878064516129	80.853137254902	2.34826869067056	0	0
84254	CAMKK1	2.98741935483871	15.2080392156863	2.34786248397244	0	0
142913	CFL1P1	1.49806451612903	7.62196078431373	2.3470624286671	0	0
1363	CPE	25.048064516129	127.382352941176	2.34639439139607	0	0
57343	ZNF304	1.27838709677419	6.48980392156863	2.34385013848985	0	0
151963	MB21D2	1.1641935483871	5.90960784313725	2.34373146975135	0	0
503582	ARGFX	1.07677419354839	5.46313725490196	2.34301393030734	0	0
339483	MTMR9LP	1	5.07294117647059	2.34282243172744	0	0
23423	TMED3	12.56	63.703137254902	2.34252795991038	0	0
8459	TPST2	2.07290322580645	10.5011764705882	2.34082629491698	0	0
84440	RAB11FIP4	2.58483870967742	13.0933333333333	2.34068626262414	0	0
728609	SDHAP3	1.36161290322581	6.89509803921569	2.34025445131296	0	0
132864	CPEB2	3.61838709677419	18.3203921568627	2.34003172382075	0	0
401612	SLC25A53	1.50741935483871	7.6156862745098	2.33689322685713	0	0
333	APLP1	36.6370967741936	184.970196078431	2.33591574066399	0	0
23394	ADNP	42.8609677419355	215.672352941176	2.33110491956814	3+	0
25840	METTL7A	1.77709677419355	8.94117647058824	2.33094242478976	0	0
266727	MDGA1	2.93354838709677	14.7545098039216	2.33043729652883	0	0
7923	HSD17B8	2.32032258064516	11.6470588235294	2.32756839022398	0	0
4807	NHLH1	38.2854838709677	191.938431372549	2.32577421179644	0	0
3614	IMPDH1	9.6441935483871	48.2990196078431	2.32426139532625	0	0
10293	TRAIP	10.8938709677419	54.5209803921569	2.32329482039296	0	0
146664	MGAT5B	1.29935483870968	6.5	2.32264425029591	0	0
22809	ATF5	2.00258064516129	10.0174509803922	2.3225832029332	0	0
79659	DYNC2H1	5.5458064516129	27.7325490196078	2.32211105449033	0	0
648987	LOC648987	2.07774193548387	10.3882352941176	2.32186221509244	0	0
283373	ANKRD52	3.58483870967742	17.9198039215686	2.32157473625992	0	0
166	AES	43.5961290322581	217.765294117647	2.32050209923254	0	0
54838	WBP1L	4.61290322580645	23.0409803921569	2.3204551731585	0	0
100009676	ZBTB11-AS1	2.28935483870968	11.4180392156863	2.31830192649101	0	0
100874243	PRICKLE2-AS3	1.61096774193548	8.01313725490196	2.31443958267978	0	0
79635	CCDC121	5.11258064516129	25.3829411764706	2.31173564684506	0	0
3017	HIST1H2BD	3.29032258064516	16.3194117647059	2.31028811942121	0	1
51684	SUFU	2.52806451612903	12.5380392156863	2.31020656063294	1	0
374354	NHLRC2	4.61903225806452	22.9072549019608	2.31014205646587	1	0
85463	ZC3H12C	5.78161290322581	28.6147058823529	2.30721285386308	0	0
400961	PAIP2B	3.41612903225806	16.8998039215686	2.30657213403639	0	0
4849	CNOT3	2.99677419354839	14.8221568627451	2.30627311208223	1	0
23171	GPD1L	4.62741935483871	22.8407843137255	2.30333243864075	0	0
11228	RASSF8	1.44451612903226	7.12196078431373	2.30168817911334	0	0
338739	CSTF3-AS1	3.45774193548387	17.0270588235294	2.29992714771937	0	0
1407	CRY1	10.2864516129032	50.5811764705882	2.29785519333096	0	0
10780	ZNF234	3.55774193548387	17.4858823529412	2.29715682540228	0	0
8556	CDC14A	3.18032258064516	15.5890196078431	2.29328518907595	0	0
9912	ARHGAP44	2.28709677419355	11.193137254902	2.29102513994536	1	0
10396	ATP8A1	5.82483870967742	28.3721568627451	2.28418582196339	0	0
6263	RYR3	1.21612903225807	5.91137254901961	2.28119683759628	0	1
29091	STXBP6	3.68548387096774	17.9096078431373	2.28080779798364	0	0
9066	SYT7	7.31032258064516	35.5043137254902	2.27998734662581	0	0
9886	RHOBTB1	4.0841935483871	19.8166666666667	2.27859116752921	0	0
503542	SPRN	4.19354838709677	20.3309803921569	2.27743637815149	0	0
3107	HLA-C	1.20387096774194	5.8243137254902	2.27440729741836	0	0
124930	ANKRD13B	11.5054838709677	55.6541176470588	2.27416677294765	0	0
201626	PDE12	2.84290322580645	13.7503921568627	2.27403586970552	0	0
729603	LOC729603	2.52967741935484	12.2323529411765	2.27367660715367	0	0
122060	SLAIN1	14.0258064516129	67.7398039215686	2.271920085973	0	0
9439	MED23	5.04806451612903	24.3692156862745	2.27125756550346	0	0
255027	MPV17L	1.42129032258065	6.84862745098039	2.26861360370529	0	0
4929	NR4A2	2.70903225806452	13.0521568627451	2.26843875338221	0	0
503693	LOH12CR2	3.01806451612903	14.5337254901961	2.26770901108274	0	0
65977	PLEKHA3	2.57838709677419	12.4098039215686	2.26693954180812	0	0
166968	MIER3	6.82645161290323	32.8554901960784	2.26692670085223	0	0
388135	C15orf59	1.46387096774194	7.0321568627451	2.26417885879373	0	0
4741	NEFM	6.99451612903226	33.5762745098039	2.26314600113374	0	0
2916	GRM6	1.47129032258065	7.0521568627451	2.26098261051605	0	0
55770	EXOC2	8.14677419354839	39.048431372549	2.26096376828206	0	0
23637	RABGAP1	12.4874193548387	59.8466666666667	2.2607955333695	0	0
162681	C18orf54	2.23870967741935	10.7074509803922	2.25787572004863	1	0
4125	MAN2B1	4.18870967741936	20.0049019607843	2.25577575988243	0	0
64689	GORASP1	1.95129032258065	9.31176470588235	2.25462615881176	0	0
54329	GPR85	4.38548387096774	20.9278431372549	2.25461569653652	0	0
133022	TRAM1L1	1.37806451612903	6.55725490196078	2.25044854670443	0	0
9980	DOPEY2	6.33709677419355	30.0949019607843	2.24762516462754	0	0
91300	R3HDM4	1.34548387096774	6.38666666666667	2.24693805851267	0	0
23092	ARHGAP26	1.41967741935484	6.72686274509804	2.24437066548819	0	0
9451	EIF2AK3	1	4.73117647058824	2.24219897367865	0	0
63974	NEUROD6	371.822903225806	1755.69647058824	2.23935590553804	0	0
8643	PTCH2	1.23032258064516	5.80705882352941	2.2387710199732	0	0
7772	ZNF229	1.9458064516129	9.17549019607843	2.23741702218503	0	0
7692	ZNF133	2.83903225806452	13.371568627451	2.23569757218967	0	0
92714	ARRDC1	3.63870967741935	17.1243137254902	2.23454731950482	0	0
9644	SH3PXD2A	3.50645161290323	16.4927450980392	2.23374782004216	0	0
117246	FTSJ3	6.41516129032258	30.1558823529412	2.23288200548306	0	0
57540	PTCHD2	9.30258064516129	43.6807843137255	2.23129586350333	0	0
50863	NTM	11.3090322580645	53.0870588235294	2.23088473458411	0	0
169714	QSOX2	6.50709677419355	30.4992156862745	2.2286862280927	0	0
23038	WDTC1	3.88064516129032	18.1872549019608	2.22855937885616	0	0
114899	C1QTNF3	1.66064516129032	7.77960784313726	2.2279535951703	0	0
6102	RP2	2.86451612903226	13.4166666666667	2.2276629163176	0	0
57231	SNX14	4.63225806451613	21.663137254902	2.22545465546846	0	0
23348	DOCK9	4.01806451612903	18.7703921568627	2.22388615768645	0	0
84937	ZNRF1	20.6303225806452	96.2588235294118	2.22215241113841	0	0
4753	NELL2	26.2706451612903	122.562745098039	2.22199697939052	0	0
51735	RAPGEF6	1.47612903225806	6.88509803921569	2.22165836090732	0	0
342918	C19orf81	1.41870967741936	6.60803921568627	2.21964285982371	0	0
4124	MAN2A1	3.01774193548387	14.021568627451	2.21610641314905	0	0
5606	MAP2K3	1.97064516129032	9.15588235294118	2.21603090041283	0	0
1954	MEGF8	15.37	71.3958823529412	2.21572370642046	0	0
50511	SYCP3	2.14677419354839	9.96882352941176	2.21525280439382	0	0
2781	GNAZ	13.7809677419355	63.9778431372549	2.21489515411589	0	0
2235	FECH	2.10612903225806	9.77235294117647	2.21411214338201	0	0
84449	ZNF333	3.3841935483871	15.686862745098	2.21267286659562	0	0
221496	LEMD2	4.26290322580645	19.6723529411765	2.20626131415335	0	0
55892	MYNN	11.151935483871	51.4345098039216	2.20544253539965	0	0
57659	ZBTB4	7.41870967741936	34.2141176470588	2.20535155350242	0	0
165215	FAM171B	3.98838709677419	18.3723529411765	2.2036590599501	0	0
57520	HECW2	1	4.6056862745098	2.20341614243259	0	1
6150	MRPL23	17.4006451612903	80.1213725490196	2.20304633831896	0	0
1780	DYNC1I1	6.43322580645161	29.6190196078431	2.20290965475169	0	0
58480	RHOU	6.16838709677419	28.3688235294118	2.20134111305237	0	0
55610	CCDC132	5.55741935483871	25.5294117647059	2.19967328311388	0	0
388403	YPEL2	1.12193548387097	5.14980392156863	2.19852778568177	0	0
83694	RPS6KL1	8.63322580645161	39.5574509803922	2.1959778355776	0	0
51363	CHST15	1	4.57333333333333	2.19324607567693	0	0
388566	ZNF470	3.34064516129032	15.2678431372549	2.19229761455488	0	0
401321	LINC00997	8.74387096774194	39.8760784313725	2.18917951986997	0	0
2571	GAD1	2.45387096774194	11.1809803921569	2.18791540021739	0	0
5430	POLR2A	11.7441935483871	53.5021568627451	2.1876494032634	0	0
54715	RBFOX1	17.481935483871	79.6147058823529	2.18717002081439	0	0
285521	COX18	3.47483870967742	15.8196078431373	2.18669591741404	0	0
1836	SLC26A2	5.73612903225806	26.1078431372549	2.18633389390344	0	0
80007	C10orf88	5.28612903225806	24.048431372549	2.1856592470493	0	0
23473	CAPN7	9.13870967741935	41.5649019607843	2.18530342244038	0	0
8569	MKNK1	1.1741935483871	5.33843137254902	2.18474565240115	0	0
5126	PCSK2	7.67741935483871	34.8788235294118	2.18365802047253	1	0
1798	DPAGT1	6.22451612903226	28.2133333333333	2.18034352987966	0	0
57787	MARK4	2.3458064516129	10.6321568627451	2.18027840570527	0	0
10712	FAM189B	3.24193548387097	14.6864705882353	2.17956044718265	0	0
57727	NCOA5	10.0003225806452	45.2917647058824	2.17920221450184	0	0
200539	ANKRD23	1.57935483870968	7.15294117647059	2.17920123477483	0	0
1917	EEF1A2	4.68483870967742	21.2049019607843	2.17832652822835	0	2+
64130	LIN7B	6.2058064516129	28.0709803921569	2.17738884401753	0	0
79735	TBC1D17	4.86064516129032	21.9858823529412	2.17735771006916	0	0
57574	MARCH4	4.98	22.5041176470588	2.17597135250219	0	0
54480	CHPF2	1.41387096774193	6.38470588235294	2.17496969895428	0	0
10123	ARL4C	13.5525806451613	61.1445098039216	2.17365537249719	0	0
4089	SMAD4	21.8848387096774	98.5207843137255	2.17049636161231	0	0
65083	NOL6	5.72838709677419	25.7760784313725	2.16983189760963	1	0
9679	FAM53B	8.04290322580645	36.1858823529412	2.169638684172	0	0
2969	GTF2I	4.94129032258065	22.2280392156863	2.16942096259014	0	0
55898	UNC45A	5.32193548387097	23.9011764705882	2.16705870645813	0	0
284802	FRG1B	10.7612903225807	48.2750980392157	2.16542811578508	0	0
1745	DLX1	3.22258064516129	14.4552941176471	2.16530959557737	0	0
10629	TAF6L	3.34290322580645	14.9862745098039	2.16446828738674	0	0
5600	MAPK11	2.36516129032258	10.5935294117647	2.1631728519447	0	0
84457	PHYHIPL	7.07225806451613	31.6376470588235	2.16139948401944	0	0
10422	UBAC1	9.45903225806452	42.3129411764706	2.16133447517083	0	0
22824	HSPA4L	1.12290322580645	5.0156862745098	2.1592135134607	0	0
4494	MT1F	12.3148387096774	55.0062745098039	2.15919846213414	0	0
57646	USP28	5.52032258064516	24.6317647058824	2.15769551264494	0	0
283450	HECTD4	8.72354838709677	38.9025490196078	2.15687769874659	3+	0
8932	MBD2	4.46129032258065	19.8398039215686	2.15286482653133	0	0
84530	SRRM4	48.9290322580645	217.426470588235	2.15176493813332	0	0
115207	KCTD12	7.49870967741936	33.3149019607843	2.15145337427478	0	0
375323	LHFPL4	1.52967741935484	6.79490196078431	2.15122528811513	0	0
6750	SST	16.9745161290323	75.17	2.14678655385412	0	0
968	CD68	1.37225806451613	6.07450980392157	2.14621617413164	0	0
389668	XKR9	1.29161290322581	5.70117647058824	2.14208589975189	0	0
162972	ZNF550	2.82870967741935	12.4833333333333	2.14178719848462	0	0
54454	ATAD2B	4.78645161290323	21.1064705882353	2.14065692216364	0	0
6876	TAGLN	1	4.40490196078431	2.13910990966458	0	0
26470	SEZ6L2	17.3864516129032	76.5741176470588	2.13889331374353	0	0
23264	ZC3H7B	2.33548387096774	10.2841176470588	2.13862463243276	0	0
85315	PAQR8	1.52903225806452	6.73137254901961	2.13828186147438	0	0
79762	C1orf115	6.55483870967742	28.8558823529412	2.13823325969055	0	0
54971	BANP	6.33774193548387	27.8994117647059	2.13819388299691	0	0
2053	EPHX2	4.16322580645161	18.3229411764706	2.13787738660008	0	0
65012	SLC26A10	2.33354838709677	10.2550980392157	2.13574399650878	0	0
84865	CCDC142	5.63129032258065	24.7313725490196	2.13480487264177	0	0
114825	PWWP2A	17.861935483871	78.3998039215686	2.13396162965496	0	1
23057	NMNAT2	11.6225806451613	51.006862745098	2.13376093203919	0	0
9454	HOMER3	9.42709677419355	41.3190196078431	2.13192057991986	0	0
23214	XPO6	10.8277419354839	47.3762745098039	2.12943234658342	0	0
115908	CTHRC1	1.08870967741935	4.76313725490196	2.1292928354399	0	0
79598	CEP97	17.7312903225806	77.5207843137255	2.1282856409174	0	0
50512	PODXL2	7.59548387096774	33.176862745098	2.12696368951117	0	0
84894	LINGO1	9.34709677419355	40.8180392156863	2.12661664510371	0	0
643836	ZFP62	12.6612903225806	55.2054901960784	2.12438731191874	0	0
89910	UBE3B	11.3593548387097	49.463137254902	2.12247284872981	0	0
9472	AKAP6	8.29741935483871	36.1127450980392	2.12177348293868	0	1
7275	TUB	1.8841935483871	8.19921568627451	2.12153874293382	0	0
2674	GFRA1	1	4.35156862745098	2.12153554880273	0	0
1630	DCC	18.2845161290323	79.56	2.12142082764289	0	0
83475	DOHH	1.47516129032258	6.41705882352941	2.12103950445411	0	0
84687	PPP1R9B	6.86741935483871	29.8666666666667	2.12069626283815	0	0
1995	ELAVL3	79.8625806451613	346.838823529412	2.11867379972552	0	0
10382	TUBB4A	5.4958064516129	23.8480392156863	2.11746755071256	0	1
64409	WBSCR17	1.91096774193548	8.28725490196078	2.11659087259214	0	0
285103	MED15P9	2.93967741935484	12.7403921568627	2.11567992818798	0	0
56934	CA10	3.11225806451613	13.4882352941176	2.1156680117046	0	0
5597	MAPK6	33.7151612903226	145.967647058824	2.11417923444824	0	0
23345	SYNE1	11.0051612903226	47.6403921568627	2.11400499959606	0	0
6095	RORA	1.24161290322581	5.37078431372549	2.11291732956294	0	0
9475	ROCK2	22.8245161290323	98.7262745098039	2.11284981136735	0	0
79134	TMEM185B	5.87290322580645	25.3574509803922	2.11026395772412	0	0
23229	ARHGEF9	9.01354838709677	38.8792156862745	2.10883204313493	0	1
729678	LINC00847	1	4.31313725490196	2.10873762699652	0	0
51201	ZDHHC2	3.67193548387097	15.8296078431373	2.10801289927557	0	0
81627	TRMT1L	3.29096774193548	14.1754901960784	2.10681483485293	0	0
64919	BCL11B	90.6258064516129	389.845490196078	2.10490861197668	0	0
80758	PRR7	1.62161290322581	6.97450980392157	2.10466234866923	0	0
23443	SLC35A3	11.3425806451613	48.7176470588235	2.10269553913262	1	0
26273	FBXO3	18.5074193548387	79.4288235294118	2.10155889265924	0	0
5581	PRKCE	1.10612903225807	4.7321568627451	2.09697820852024	0	0
112840	WDR89	7.48451612903226	32.0172549019608	2.0968686644952	0	0
79148	MMP28	1	4.27470588235294	2.09582515995922	0	0
6528	SLC5A5	1.78548387096774	7.63117647058824	2.09559038772082	0	0
649	BMP1	3.51935483870968	15.0398039215686	2.0954028721285	0	0
26099	SZRD1	11.2390322580645	47.9856862745098	2.0940863092421	0	0
8658	TNKS	16.3432258064516	69.6943137254902	2.09234818413767	0	0
8492	PRSS12	1	4.26274509803922	2.09178278816845	0	0
23139	MAST2	7.32741935483871	31.2194117647059	2.09106626445666	0	0
9757	KMT2B	7.60193548387097	32.3586274509804	2.08971172808109	0	2+
678655	CD27-AS1	1.08870967741935	4.62764705882353	2.08765955057708	0	0
84270	C9orf89	7.61161290322581	32.3443137254902	2.08723800351217	0	0
64927	TTC23	3.76903225806452	15.9933333333333	2.08520460912997	0	0
10000	AKT3	43.4029032258065	184.108431372549	2.08469224434697	0	0
4528	MTIF2	5.05903225806452	21.4560784313725	2.08445307265913	0	0
9755	TBKBP1	5.19193548387097	22.0119607843137	2.08394330221458	0	0
79814	AGMAT	1.34193548387097	5.68705882352941	2.08336741387366	0	0
128637	TBC1D20	7.36161290322581	31.1829411764706	2.08266321413365	0	0
5422	POLA1	5.85741935483871	24.8105882352941	2.08261884929372	0	0
6511	SLC1A6	4.32612903225806	18.3192156862745	2.08220913636455	0	0
85465	EPT1	3.28774193548387	13.9135294117647	2.08131946410164	0	0
147807	ZNF524	2.83193548387097	11.9772549019608	2.08043698705195	0	0
219347	TMEM254-AS1	1.87387096774194	7.91862745098039	2.07922877285662	0	0
79710	MORC4	3.46709677419355	14.6374509803922	2.07786432830449	0	0
169981	SPIN3	5.16645161290323	21.7943137254902	2.07670611203518	0	0
8027	STAM	12.8522580645161	54.2074509803922	2.0764693135287	1	0
4254	KITLG	1.35064516129032	5.68803921568627	2.07428270894703	0	0
63894	VIPAS39	5.1258064516129	21.5801960784314	2.07385706407717	0	0
357	SHROOM2	2.19548387096774	9.24294117647059	2.07381306578639	0	0
6305	SBF1	8.90516129032258	37.4872549019608	2.07368653776422	0	0
5228	PGF	1.71032258064516	7.19235294117647	2.07219536342027	0	0
140609	NEK7	9.10870967741936	38.3043137254902	2.07218826944676	0	0
4686	NCBP1	18.7006451612903	78.6056862745098	2.07154563659729	0	0
22927	HABP4	5.83709677419355	24.5252941176471	2.07094754574332	0	0
152815	THAP6	3.11483870967742	13.086862745098	2.07088992221446	0	0
27239	GPR162	4.2841935483871	17.9945098039216	2.07046123795999	0	0
4864	NPC1	1.22032258064516	5.11156862745098	2.0665035294471	0	0
8916	HERC3	2.32548387096774	9.72352941176471	2.06394913946519	0	0
58476	TP53INP2	2.50032258064516	10.4317647058823	2.06079709208863	0	0
10912	GADD45G	32.2312903225806	134.317843137255	2.05911711851308	0	0
2892	GRIA3	13.0670967741935	54.4054901960784	2.05781360368569	0	0
774	CACNA1B	2.29838709677419	9.56372549019608	2.0569509219723	0	0
56061	UBFD1	9.73258064516129	40.4264705882353	2.05440595632147	0	0
1911	PHC1	11.7529032258065	48.7786274509804	2.05323198543258	0	0
7200	TRH	1	4.14725490196078	2.0521567220674	0	0
55602	CDKN2AIP	6.87967741935484	28.4856862745098	2.04982433868895	0	0
57282	SLC4A10	3.65677419354839	15.1278431372549	2.04856286109989	0	0
112950	MED8	12.5738709677419	51.9219607843137	2.04591600293452	0	0
23051	ZHX3	4.62322580645161	19.0829411764706	2.04531181206512	0	0
9797	TATDN2	3.83548387096774	15.816862745098	2.0439829718491	0	0
6714	SRC	5.36516129032258	22.1086274509804	2.04291601465232	0	0
2913	GRM3	7.21870967741935	29.7017647058824	2.04073576222707	0	0
114789	SLC25A25	6.21032258064516	25.5074509803922	2.03817862131692	0	0
23046	KIF21B	26.9061290322581	110.499411764706	2.03803193816026	0	0
100216546	LINC01004	4.62354838709677	18.9670588235294	2.03642358866543	0	0
9910	RABGAP1L	6.95193548387097	28.5170588235294	2.03633859491265	0	0
6609	SMPD1	3.50935483870968	14.3862745098039	2.03541530372821	0	0
56133	PCDHB2	1	4.09529411764706	2.03396706769862	0	0
3613	IMPA2	3.79064516129032	15.521568627451	2.03375904667835	0	0
7582	ZNF33B	6.49870967741936	26.6047058823529	2.03345625072414	0	0
4798	NFRKB	9.94225806451613	40.6949019607843	2.033202616763	0	0
1826	DSCAM	1	4.0878431372549	2.03133983682191	2	0
11054	OGFR	3.07258064516129	12.5509803921569	2.03027727930037	0	0
2180	ACSL1	4.58483870967742	18.7182352941176	2.02950154067868	0	0
6901	TAZ	4.89903225806452	19.9649019607843	2.02689729121727	0	0
10665	C6orf10	1	4.07333333333333	2.02620987932285	0	0
7922	SLC39A7	1.02967741935484	4.19313725490196	2.02583761895673	0	0
64641	EBF2	9.76387096774194	39.7217647058824	2.02440458368872	0	1
57176	VARS2	6.46451612903226	26.2447058823529	2.0214121366946	0	0
386597	RNF144A-AS1	1.34483870967742	5.45313725490196	2.01965331175269	0	0
51696	HECA	14.6122580645161	59.2501960784314	2.0196407901517	0	0
285527	FRYL	36.9090322580645	149.530980392157	2.01839860215628	1	0
112611	RWDD2A	2.64612903225806	10.7045098039216	2.01626341322616	0	0
64236	PDLIM2	6.07225806451613	24.5580392156863	2.01589036621953	0	0
55964	SEPT3	64.6748387096774	261.505490196078	2.01556477941604	0	0
64789	EXO5	4.9641935483871	20.0525490196078	2.01415436863053	0	0
5426	POLE	6.11709677419355	24.6996078431373	2.01356913104252	0	0
6584	SLC22A5	2.78870967741935	11.26	2.01353717393746	0	0
54511	HMGCLL1	1.53516129032258	6.19529411764706	2.01278253602211	0	0
9452	ITM2A	27.4906451612903	110.91137254902	2.01239463299456	0	0
23172	FAM175B	11.53	46.491568627451	2.01157659027882	0	0
10397	NDRG1	1.46548387096774	5.90803921568627	2.01130231239042	0	0
730094	C16orf52	7.84483870967742	31.6062745098039	2.01039530140344	0	0
134111	UBE2QL1	4.7858064516129	19.2790196078431	2.01019773089466	0	0
4037	LRP3	16.9203225806452	67.9972549019608	2.00671943165446	0	0
54923	LIME1	2.84225806451613	11.3947058823529	2.00325423055903	0	0
84187	TMEM164	2.83806451612903	11.3678431372549	2.00197926149	0	0
2845	GPR22	1.37290322580645	5.49254901960784	2.00024590505399	0	0
6936	GCFC2	9.61870967741936	38.4803921568627	2.00020822316138	0	0
387763	C11orf96	3.65838709677419	14.623137254902	1.99897322002873	0	0
9118	INA	25.2561290322581	100.913921568628	1.99841977345555	0	0
57669	EPB41L5	20.4967741935484	81.7978431372549	1.99666592783016	0	0
10892	MALT1	2.78903225806452	11.1290196078431	1.99648998065135	0	0
8945	BTRC	7.98354838709677	31.818431372549	1.99476069571213	1	0
29979	UBQLN1	33.8167741935484	134.774509803922	1.99473671056522	0	0
57621	ZBTB2	4.53451612903226	18.0545098039216	1.99333873396052	0	0
57835	SLC4A5	1.33935483870968	5.33039215686274	1.99270344774296	1	0
25989	ULK3	5.41225806451613	21.528431372549	1.99194066824205	0	0
166614	DCLK2	12.0748387096774	48.0139215686275	1.99144885556393	0	0
2770	GNAI1	19.6709677419355	78.1788235294118	1.99070993960952	0	0
7057	THBS1	1.63	6.47803921568627	1.99068523725267	0	0
84258	SYT3	5.53774193548387	21.9829411764706	1.98901469324086	0	0
100507206	LINC00943	1	3.96627450980392	1.98778453138106	0	0
90952	ESAM	5.10290322580645	20.2182352941176	1.98626689310037	0	0
79948	LPPR3	1.5258064516129	6.04450980392157	1.9860533768473	0	0
2250	FGF5	2.83806451612903	11.2429411764706	1.98604020605377	0	0
594	BCKDHB	4.04193548387097	16.0041176470588	1.98532493999733	0	0
23309	SIN3B	8.23129032258065	32.5666666666667	1.98420555365044	0	0
10347	ABCA7	5.54451612903226	21.9292156862745	1.9837207472128	0	0
27342	RABGEF1	18.3916129032258	72.7150980392157	1.98320693963534	0	0
1	A1BG	5.82096774193548	23.01	1.98293005582637	0	0
440248	HERC2P9	4.1641935483871	16.4594117647059	1.98280374625045	0	0
342357	ZKSCAN2	6.55967741935484	25.9270588235294	1.98276178023985	0	0
84302	TMEM246	6.54741935483871	25.8713725490196	1.98235830508777	0	0
9275	BCL7B	8.41032258064516	33.2280392156863	1.98216812051675	0	0
57634	EP400	23.1551612903226	91.3478431372549	1.98003685865252	1	0
23432	GPR161	53.9590322580645	212.773333333333	1.97938097140719	0	0
1263	PLK3	8.76516129032258	34.5554901960784	1.97906240123965	0	0
84640	USP38	3.82193548387097	15.058431372549	1.97819616294985	0	0
100506215	PAXBP1-AS1	2.8541935483871	11.2254901960784	1.9756233709397	0	0
57591	MKL1	8.62967741935484	33.9113725490196	1.97439064100851	0	0
57645	POGK	11.9383870967742	46.796862745098	1.9708038765943	0	0
256987	SERINC5	6.52516129032258	25.5776470588235	1.97079808571515	0	0
3800	KIF5C	120.328387096774	471.662352941176	1.97077741872239	0	0
9479	MAPK8IP1	15.3003225806452	59.9298039215686	1.96971158375402	0	1
23367	LARP1	36.4029032258065	142.58568627451	1.96970374267374	0	0
382	ARF6	17.3309677419355	67.8323529411765	1.96862132206811	0	0
257019	FRMD3	7.39548387096774	28.906862745098	1.96669559393335	0	0
196500	PIANP	11.0829032258065	43.291568627451	1.96575022355345	0	0
117583	PARD3B	4.83096774193548	18.8535294117647	1.9644504991302	1	0
57717	PCDHB16	1.29161290322581	5.03941176470588	1.96408158344969	0	0
8826	IQGAP1	9.48741935483871	36.9947058823529	1.9632312065524	0	0
51204	TACO1	6.53903225806452	25.4886274509804	1.96270464163778	0	0
9687	GREB1	3.90806451612903	15.2317647058824	1.96255690847357	0	0
9911	TMCC2	6.82161290322581	26.5776470588235	1.96202859154023	0	0
51161	C3orf18	3.85967741935484	15.0190196078431	1.96023846016598	0	0
26034	IPCEF1	6.4158064516129	24.9498039215686	1.95932595242551	0	0
171392	ZNF675	1.09322580645161	4.24960784313725	1.95873829313622	0	0
359845	FAM101B	3.36451612903226	13.0782352941176	1.9586969421946	0	0
11261	CHP1	11.9151612903226	46.2850980392157	1.95774929702521	0	0
1154	CISH	1.81741935483871	7.05666666666667	1.95709551529838	0	0
51555	PEX5L	2.08354838709677	8.08607843137255	1.95639759245238	0	0
400892	BCRP2	1.09451612903226	4.24392156862745	1.95510477968685	0	0
1381	CRABP1	3.94451612903226	15.2825490196078	1.95396495279504	0	0
79012	CAMKV	20.1722580645161	78.078431372549	1.9525514818795	0	0
222962	SLC29A4	6.62064516129032	25.62	1.95222676053711	0	0
3996	LLGL1	2.30677419354839	8.91372549019608	1.95015174414614	0	0
79932	KIAA0319L	48.1890322580645	186.149803921569	1.94968736255995	0	0
2334	AFF2	5.97935483870968	23.0921568627451	1.94934119676095	0	0
8567	MADD	9.78645161290322	37.766862745098	1.94826318044243	0	0
78992	YIPF2	4.26903225806452	16.4666666666667	1.94756757192097	0	0
83992	CTTNBP2	44.3748387096774	171.12568627451	1.94724254638447	0	0
286495	TTC3P1	2.30483870967742	8.88235294117647	1.94627610225316	0	0
4610	MYCL	5.48064516129032	21.1101960784314	1.94552234194984	0	0
55731	FAM222B	11.4225806451613	43.9664705882353	1.94451509651547	0	0
6472	SHMT2	26.0003225806452	100.065098039216	1.94433743292917	0	0
57679	ALS2	6.61516129032258	25.4582352941176	1.94428418070957	0	0
5563	PRKAA2	10.8993548387097	41.9411764705882	1.94412458966554	0	0
3628	INPP1	5.02354838709677	19.3245098039216	1.94365314035927	0	0
92691	TMEM169	4.78032258064516	18.3672549019608	1.94195614198929	0	0
100128288	LOC100128288	1.77838709677419	6.83039215686274	1.94139902516559	0	0
64838	FNDC4	11.458064516129	43.9903921568627	1.94082509616977	0	0
84984	CEP19	4.45064516129032	17.07	1.93937667031352	0	0
9640	ZNF592	3.69096774193548	14.1447058823529	1.93819114441182	0	0
81617	CAB39L	9.77290322580645	37.4390196078431	1.93768354562908	0	0
10846	PDE10A	7.56451612903226	28.9403921568627	1.93576476400403	0	0
50640	PNPLA8	15.3458064516129	58.688431372549	1.93523168400947	0	0
56262	LRRC8A	6.29806451612903	24.0862745098039	1.93523082388493	0	0
5593	PRKG2	1	3.82117647058824	1.93401688616011	0	0
85300	ATCAY	61.1387096774194	233.337647058824	1.93226108294965	0	0
399909	PCNXL3	3.01516129032258	11.4821568627451	1.92908658661024	0	0
56999	ADAMTS9	5.36258064516129	20.4135294117647	1.92852629587178	1	0
127700	OSCP1	6.68677419354839	25.4288235294118	1.92708241222345	0	0
9659	PDE4DIP	9.45935483870968	35.9249019607843	1.92517052441327	0	0
6595	SMARCA2	14.8348387096774	56.2521568627451	1.92291917295093	0	1
1496	CTNNA2	12.7790322580645	48.4401960784314	1.92242611812409	0	0
23291	FBXW11	16.7687096774194	63.5376470588235	1.92183998447769	1	0
64375	IKZF4	8.26903225806452	31.3	1.92037225435191	0	0
284454	LOC284454	1.8458064516129	6.97666666666667	1.91828662359825	0	0
23194	FBXL7	9.38387096774193	35.4562745098039	1.9177858752474	0	0
140885	SIRPA	1.67967741935484	6.33549019607843	1.91527205814398	0	0
8320	EOMES	62.8341935483871	236.841960784314	1.9143029290642	0	0
9829	DNAJC6	6.35516129032258	23.9517647058824	1.91413130845121	0	0
54332	GDAP1	21.2251612903226	79.9460784313726	1.91325175051557	0	0
60493	FASTKD5	2.92483870967742	10.9962745098039	1.91058585315672	0	0
84502	JPH4	20.0322580645161	75.1827450980392	1.90807653956992	0	0
8497	PPFIA4	1.56548387096774	5.87333333333333	1.90757087382193	0	0
118426	LOH12CR1	2.69806451612903	10.1223529411765	1.90754793197002	0	0
7023	TFAP4	3.93064516129032	14.7354901960784	1.90645701890684	0	0
23067	SETD1B	8.56193548387097	32.0898039215686	1.906106104689	0	0
123879	DCUN1D3	1.02967741935484	3.85745098039216	1.905455387412	0	0
9820	CUL7	6.62903225806452	24.8323529411765	1.90535078933923	0	0
441151	TMEM151B	10.8067741935484	40.4821568627451	1.90535021297302	0	0
8503	PIK3R3	27.0483870967742	101.256666666667	1.90440242373341	0	0
51719	CAB39	18.54	69.2735294117647	1.90166293550184	0	0
7982	ST7	14.8012903225806	55.2433333333333	1.90007742291541	0	0
22979	EFR3B	20.678064516129	77.1639215686274	1.8998253103188	0	0
6091	ROBO1	30.4567741935484	113.643725490196	1.89968297905483	0	0
54842	MFSD6	2.19064516129032	8.16843137254902	1.89870323972192	0	0
79772	MCTP1	1.99806451612903	7.44235294117647	1.89715564197927	0	0
84249	PSD2	5.38709677419355	20.0423529411765	1.8954720014381	0	0
2178	FANCE	4.18935483870968	15.5694117647059	1.89391444741981	1	0
7741	ZSCAN26	9.76032258064516	36.2698039215686	1.89376821091279	0	0
9547	CXCL14	2.12612903225806	7.89470588235294	1.89265636443076	0	0
57474	ZNF490	5.88806451612903	21.8401960784314	1.89112042429155	1	0
84263	HSDL2	6.00612903225806	22.2750980392157	1.89092440710377	0	0
374920	C19orf68	1.84741935483871	6.85	1.89059260010967	0	0
5158	PDE6B	7.49967741935484	27.7621568627451	1.88821920834078	0	0
349152	DPY19L2P2	1.49806451612903	5.53372549019608	1.88515132169356	0	0
6092	ROBO2	38.9067741935484	143.593529411765	1.8838974652991	0	0
10746	MAP3K2	12.1654838709677	44.8974509803922	1.8838398360563	0	0
51278	IER5	18.0277419354839	66.4741176470588	1.88257401906465	0	0
2009	EML1	16.1048387096774	59.3701960784314	1.88224466564821	0	0
11257	TP53TG1	9.51161290322581	35.0619607843137	1.88214477114909	0	0
8499	PPFIA2	32.8329032258065	121.026078431373	1.88210371979668	0	0
4931	NVL	5.52451612903226	20.3443137254902	1.88070559973665	0	0
729956	SHISA7	2.60161290322581	9.56372549019608	1.87816640275612	0	0
23774	BRD1	11.1835483870968	41.1111764705882	1.87815264957845	0	0
4215	MAP3K3	10.2467741935484	37.6409803921569	1.87713440116698	0	0
828	CAPS	1.44032258064516	5.28725490196078	1.87612692180472	0	0
2572	GAD2	5.10193548387097	18.7027450980392	1.87413347674144	0	0
10380	BPNT1	7.33290322580645	26.8807843137255	1.87411882794372	0	0
3572	IL6ST	7.24612903225806	26.5623529411765	1.87410054758616	0	0
221061	FAM171A1	17.3390322580645	63.5388235294118	1.87361499789042	0	0
57670	KIAA1549	16.7196774193548	61.2629411764706	1.87346761794879	0	0
27253	PCDH17	10.9225806451613	40.0201960784314	1.87341447799256	0	0
2562	GABRB3	13.7196774193548	50.2619607843137	1.87322039283587	1	2+
5836	PYGL	1.34129032258064	4.90843137254902	1.87164050167683	0	0
50484	RRM2B	2.06322580645161	7.54333333333333	1.87030045545228	0	0
92014	SLC25A51	4.49258064516129	16.4198039215686	1.86982059262933	0	0
100132341	CLUHP3	4.68258064516129	17.1052941176471	1.86906716436488	0	0
7571	ZNF23	3.93645161290323	14.3786274509804	1.86895831641532	0	0
5612	PRKRIR	33.3445161290323	121.444117647059	1.86477119324481	0	0
9181	ARHGEF2	15.7758064516129	57.4525490196078	1.86465714593667	0	0
25943	C20orf194	14.2987096774194	52.0556862745098	1.86417080077002	1	0
7795	MEMO1	7.5458064516129	27.4372549019608	1.86238914615254	1	0
51072	MEMO1	7.5458064516129	27.4372549019608	1.86238914615254	1	0
9990	SLC12A6	4.13161290322581	15.0192156862745	1.86203247882921	1	0
1272	CNTN1	8.65967741935484	31.4737254901961	1.86176276865013	0	0
5295	PIK3R1	1.75645161290323	6.38313725490196	1.86160183657215	0	0
54853	WDR55	2.51258064516129	9.12647058823529	1.86088714282797	0	0
10389	SCML2	6.14741935483871	22.3117647058824	1.85975181626237	0	0
79039	DDX54	7.76096774193548	28.1611764705882	1.85939914235669	0	0
6942	TCF20	7.03129032258065	25.4870588235294	1.85790352783667	1	0
64761	PARP12	4.9041935483871	17.7749019607843	1.85775378002485	0	0
773	CACNA1A	11.2258064516129	40.6770588235294	1.8573962775563	0	2+
514	ATP5E	29.7345161290323	107.663921568627	1.85632437640791	0	0
54993	ZSCAN2	4.76967741935484	17.2588235294118	1.85537052169779	0	1
149111	CNIH3	2.07387096774194	7.50274509803922	1.85509240900398	0	0
57648	KIAA1522	8.21612903225806	29.7137254901961	1.85459875669437	0	0
79078	C1orf50	11.041935483871	39.933137254902	1.85459334158636	0	0
5163	PDK1	3.88838709677419	14.0539215686275	1.85372899797619	0	0
64839	FBXL17	2.60903225806452	9.42941176470588	1.85365299227543	0	0
79602	ADIPOR2	5.88451612903226	21.2572549019608	1.85295960801707	0	0
223082	ZNRF2	1.97354838709677	7.12333333333333	1.85176061076733	0	0
89796	NAV1	77.9606451612903	281.315490196078	1.8513710598355	0	0
596	BCL2	13.0777419354839	47.1837254901961	1.85117587427466	0	0
1845	DUSP3	5.09	18.3576470588235	1.85064359569852	0	0
56288	PARD3	18.4296774193548	66.328431372549	1.84759658818145	0	0
8434	RECK	1.74612903225806	6.28294117647059	1.84727990047838	0	0
10716	TBR1	6.49064516129032	23.3509803921569	1.84704933044778	0	0
23005	MAPKBP1	3.58	12.8758823529412	1.84663980746805	0	0
10815	CPLX1	1.76	6.32411764705882	1.84528877742473	0	0
463	ZFHX3	10.0109677419355	35.9707843137255	1.84524417300423	1	1
64221	ROBO3	4.01451612903226	14.4192156862745	1.84469467844892	0	0
79837	PIP4K2C	1.27967741935484	4.59588235294118	1.84456168584353	0	0
23506	GLTSCR1L	3.26	11.6911764705882	1.84247624446502	0	0
128866	CHMP4B	12.7225806451613	45.5549019607843	1.84021496817337	0	0
22879	MON1B	1.74612903225806	6.25176470588235	1.8401033089124	0	0
641	BLM	5.75129032258064	20.5890196078431	1.83991756317604	0	0
55317	AP5S1	9.44064516129032	33.7617647058823	1.83843295481161	0	0
200765	TIGD1	7.24193548387097	25.8978431372549	1.83838472077082	0	0
27079	RPUSD2	5.46032258064516	19.5227450980392	1.83809783569325	0	0
9807	IP6K1	15.2325806451613	54.3576470588235	1.83532263016251	0	0
11176	BAZ2A	25.0029032258065	89.2207843137255	1.83528420653685	0	0
833	CARS	13.0267741935484	46.4849019607843	1.83528233785558	0	0
93436	ARMC6	17.3216129032258	61.8062745098039	1.83518003351868	0	0
54602	NDFIP2	5.86451612903226	20.9225490196078	1.83497464355252	0	0
8527	DGKD	9.94838709677419	35.476862745098	1.83434388654261	1	0
118460	EXOSC6	3.01225806451613	10.7407843137255	1.83418206747722	0	0
55800	SCN3B	15.6658064516129	55.8249019607843	1.83328977305966	0	0
11267	SNF8	16.5190322580645	58.8535294117647	1.83299976425944	0	0
123096	SLC25A29	14.1416129032258	50.3398039215686	1.83175292283856	0	0
56965	PARP6	23.3287096774194	82.9439215686274	1.8300297457846	0	0
2175	FANCA	6.78096774193548	24.1090196078431	1.83000989844097	0	0
54768	HYDIN	2.18225806451613	7.7578431372549	1.82983388632501	0	0
133308	SLC9B2	1.67935483870968	5.9678431372549	1.82930251909618	0	0
10220	GDF11	1.88096774193548	6.67764705882353	1.82786473577394	0	0
80021	TMEM62	3.20741935483871	11.3817647058824	1.82723936345184	0	0
53822	FXYD7	4.81967741935484	17.1017647058824	1.82713670703733	0	0
3766	KCNJ10	8.34806451612903	29.6211764705882	1.82711528639567	0	0
23142	DCUN1D4	11.6706451612903	41.3952941176471	1.82658245277382	0	0
80315	CPEB4	14.5116129032258	51.4347058823529	1.82553427764356	0	0
997	CDC34	10.9567741935484	38.823137254902	1.82509359136354	0	0
9284	NPIPA1	5.42	19.1917647058824	1.82412261848772	0	0
23157	SEPT6	8.33838709677419	29.4654901960784	1.82118601375641	0	0
84515	MCM8	6.86258064516129	24.25	1.82116164423459	0	0
220594	USP32P2	8.67516129032258	30.653137254902	1.82107225097446	0	0
56940	DUSP22	2.38903225806452	8.42803921568627	1.81877069302422	0	0
64852	TUT1	7.53645161290323	26.548431372549	1.81666929674497	0	0
83698	CALN1	1	3.52176470588235	1.81629852387774	0	0
3428	IFI16	2.51	8.83549019607843	1.81562281404545	0	0
84941	HSH2D	1.77774193548387	6.25745098039216	1.81552917250524	0	0
51162	EGFL7	23.6909677419355	83.3850980392157	1.81545244724524	0	0
23169	SLC35D1	6.00354838709677	21.1103921568627	1.81406601874987	0	0
92305	TMEM129	7.19516129032258	25.2921568627451	1.81359113967992	0	0
80829	ZFP91	21.158064516129	74.3547058823529	1.81321639325764	0	0
143187	VTI1A	5.71064516129032	20.0603921568627	1.81262416053001	0	0
23729	SHPK	1.82032258064516	6.38313725490196	1.81007153593207	0	0
84168	ANTXR1	10.1035483870968	35.4152941176471	1.80951046420612	0	0
3903	LAIR1	1.31838709677419	4.62019607843137	1.80918005221903	0	0
56897	WRNIP1	6.83354838709677	23.9341176470588	1.80836180901942	0	0
4905	NSF	10.3035483870968	36.0745098039216	1.80783852542971	0	0
5327	PLAT	8.75548387096774	30.5964705882353	1.8051064261324	0	0
146198	ZFP90	18.92	66.0374509803922	1.80337234518803	0	0
64210	MMS19	12.5948387096774	43.9270588235294	1.80227725875206	0	0
23659	PLA2G15	4.88032258064516	17.0021568627451	1.80066936001616	0	0
55466	DNAJA4	5.91903225806452	20.611568627451	1.80002107979946	0	0
9960	USP3	41.3596774193548	143.977647058824	1.79954800787015	0	0
9223	MAGI1	40.328064516129	140.329607843137	1.79896335963517	0	0
5865	RAB3B	15.3254838709677	53.3225490196078	1.79881312356191	0	0
284307	ZIK1	2.79709677419355	9.73078431372549	1.79862592360385	0	0
3897	L1CAM	18.18	63.1801960784314	1.79712021493393	1	0
192111	PGAM5	6.97838709677419	24.2439215686274	1.79665754808713	0	0
8382	NME5	1.50741935483871	5.23450980392157	1.7959736177329	0	0
128989	TANGO2	4.20193548387097	14.5572549019608	1.79261241227743	0	0
51135	IRAK4	2.52193548387097	8.73549019607843	1.79235729378635	0	0
3122	HLA-DRA	1.11838709677419	3.87372549019608	1.79230210059099	0	0
10520	ZNF211	2.67161290322581	9.25058823529412	1.79183412081623	0	0
53339	BTBD1	1.92516129032258	6.66039215686274	1.79062780406552	0	0
387923	SERP2	2.45548387096774	8.49117647058824	1.78995710998586	0	0
91526	ANKRD44	5.33516129032258	18.4392156862745	1.7891735001435	0	0
7862	BRPF1	7.59774193548387	26.2349019607843	1.78784478323175	0	0
92597	MOB1B	14.2932258064516	49.343137254902	1.7875178938109	0	0
55449	DHRS4-AS1	9.15387096774194	31.5917647058824	1.78709466674303	0	0
54888	NSUN2	4.27645161290323	14.7421568627451	1.78546149306794	0	0
100996635	LOC100996635	3.57548387096774	12.3166666666667	1.78440146321782	0	0
50861	STMN3	24.7758064516129	85.2333333333333	1.78248573689779	0	0
64750	SMURF2	3.19258064516129	10.9821568627451	1.78236645492224	0	0
113655	MFSD3	5.05258064516129	17.3713725490196	1.78161939992935	1	0
55048	VPS37C	5.80548387096774	19.9474509803922	1.78071617909643	0	0
79728	PALB2	3.23387096774194	11.1066666666667	1.78009187880162	0	0
283254	HARBI1	1.31516129032258	4.51607843137255	1.77983080049027	0	0
29063	ZCCHC4	2.85322580645161	9.79078431372549	1.77883050750972	0	0
220164	DOK6	20.6196774193548	70.7533333333333	1.77877635492842	0	0
55773	TBC1D23	14.4209677419355	49.3376470588235	1.7745209321418	1	0
10298	PAK4	1.90064516129032	6.49862745098039	1.77364582961129	0	0
84893	FBXO18	27.6977419354839	94.5780392156863	1.77173686723068	1	0
3714	JAG2	5.33838709677419	18.228431372549	1.77171459020287	0	0
375346	TMEM110	4.51709677419355	15.4225490196078	1.77157350430202	0	0
56900	TMEM167B	4.03451612903226	13.7709803921569	1.77116370988656	0	0
10072	DPP3	9.22677419354839	31.4458823529412	1.76897286211457	1	0
64412	GZF1	4.56516129032258	15.5558823529412	1.76872249137478	0	1
54491	FAM105A	2.35225806451613	8.00627450980392	1.76708473614111	0	0
402176	RPL21P44	2.42451612903226	8.24960784313726	1.76662868916568	0	0
28982	FLVCR1	28.9151612903226	98.2290196078431	1.76432315052022	0	0
8828	NRP2	17.8861290322581	60.7380392156863	1.76375914630964	0	0
222183	SRRM3	7.14096774193548	24.2292156862745	1.76255619843075	0	0
3164	NR4A1	2.75935483870968	9.3621568627451	1.76250994586329	0	0
90317	ZNF616	1	3.38764705882353	1.76028357567105	0	0
84135	UTP15	3.7241935483871	12.6123529411765	1.75983749013162	0	0
114569	MAL2	6.56193548387097	22.2166666666667	1.75944905995161	0	0
80790	CMIP	11.5864516129032	39.2266666666667	1.75939594176011	0	0
130574	LYPD6	2.43	8.22627450980392	1.75928290137278	0	0
4808	NHLH2	12.3929032258065	41.9501960784314	1.7591633536504	0	0
2596	GAP43	165.132903225806	558.496470588235	1.75792055343952	0	0
55631	LRRC40	13.4270967741935	45.371568627451	1.75664114179827	0	0
781	CACNA2D1	18.5316129032258	62.5929411764706	1.75601151646991	0	0
283209	PGM2L1	42.8574193548387	144.688235294118	1.75533073370963	0	0
7464	CORO2A	1.5041935483871	5.07411764705882	1.75416675553114	0	0
2257	FGF12	6.06903225806452	20.4607843137255	1.75332305435118	0	1
9943	OXSR1	10.2622580645161	34.5803921568627	1.75260601938772	0	0
4026	LPP	25.0558064516129	84.356862745098	1.75136046849452	0	0
54938	SARS2	12.9287096774194	43.5182352941176	1.75104175791733	0	0
11182	SLC2A6	6.57645161290323	22.1335294117647	1.75085224242855	0	0
9636	ISG15	5.22903225806452	17.5947058823529	1.75052552247034	0	0
4355	MPP2	6.07	20.4147058823529	1.74984036100118	0	0
4240	MFGE8	5.42741935483871	18.2535294117647	1.74983715397436	0	0
28514	DLL1	23.1338709677419	77.7958823529412	1.74968710612682	0	0
57661	PHRF1	1.43645161290323	4.82941176470588	1.7493380793588	0	0
79734	KCTD17	3.41483870967742	11.4764705882353	1.74878968799805	0	0
9788	MTSS1	12.0783870967742	40.5745098039216	1.74814584977647	0	0
6990	DYNLT3	4.67548387096774	15.7047058823529	1.74800934052215	0	0
84954	MPND	3.90741935483871	13.1127450980392	1.74668173643046	0	0
51619	UBE2D4	6.4258064516129	21.5456862745098	1.74544962008388	0	0
27246	RNF115	7.9641935483871	26.6992156862745	1.74519717462243	0	0
140467	ZNF358	22.1116129032258	74.0682352941176	1.74405070028349	0	0
23522	KAT6B	102.37	342.783333333333	1.74350397619653	0	0
85369	STRIP1	11.9948387096774	40.0576470588235	1.73966392299821	1	0
9400	RECQL5	5.74645161290323	19.1601960784314	1.73736904150361	0	0
9792	SERTAD2	10.5077419354839	35.0149019607843	1.73651637383918	0	0
55128	TRIM68	2.04225806451613	6.80411764705882	1.73624290617182	0	0
115196	ZNF554	6.00516129032258	20.0056862745098	1.73613521934687	0	0
2017	CTTN	24.2058064516129	80.6360784313726	1.73607231757829	0	0
404201	WDFY3-AS2	4.30096774193548	14.3258823529412	1.73589078355397	0	0
152789	JAKMIP1	2.0258064516129	6.7443137254902	1.73517530412194	1	0
64421	DCLRE1C	16.2583870967742	54.1143137254902	1.7348261075755	0	0
1277	COL1A1	1.02967741935484	3.42117647058824	1.73230008683379	0	0
4345	CD200	27.9664516129032	92.8254901960784	1.73082381264701	0	0
4122	MAN2A2	4.93161290322581	16.3507843137255	1.72922837258895	0	1
56131	PCDHB4	1.21387096774194	4.02196078431373	1.72828394096624	0	0
374819	LRRC37A3	2.25290322580645	7.46098039215686	1.72757987333578	0	0
6860	SYT4	38.2029032258065	126.393725490196	1.72617066119304	0	0
6387	CXCL12	5.09741935483871	16.8627450980392	1.72600046175954	0	0
66036	MTMR9	14.9270967741935	49.3650980392157	1.72555779467708	0	0
10277	UBE4B	13.6803225806452	45.2109803921569	1.72457095335388	0	0
60561	RINT1	4.06451612903226	13.4249019607843	1.72375603432715	0	0
54675	CRLS1	10.9690322580645	36.2203921568627	1.72336591667061	0	0
729096	BMS1P4	5.84677419354839	19.2947058823529	1.72249227278674	0	0
6722	SRF	6.7758064516129	22.3556862745098	1.72217726406537	0	0
5753	PTK6	2.30129032258065	7.59058823529412	1.72176869182536	0	0
126070	ZNF440	1.66161290322581	5.4743137254902	1.72009379140523	0	0
54442	KCTD5	6.4358064516129	21.196862745098	1.71965790893179	0	0
23677	SH3BP4	3.96806451612903	13.0535294117647	1.71793254767937	0	0
27434	POLM	4.58516129032258	15.0819607843137	1.71777961462205	0	0
199731	CADM4	7.30096774193548	24.0082352941176	1.71736975259223	0	0
4761	NEUROD2	84.6935483870968	278.32	1.7164206039038	0	0
89122	TRIM4	6.55064516129032	21.521568627451	1.71607432721995	0	0
253943	YTHDF3	15.1767741935484	49.8045098039216	1.71441120429228	0	0
5613	PRKX	39.0012903225806	127.94568627451	1.71393774717666	0	1
92912	UBE2Q2	14.0093548387097	45.9517647058824	1.71372974898103	0	0
57007	ACKR3	1	3.27686274509804	1.71231524532089	0	0
79971	WLS	3.39290322580645	11.1158823529412	1.71203028426234	0	0
55151	TMEM38B	1.09451612903226	3.58352941176471	1.71108798091285	0	0
10186	LHFP	10.3012903225806	33.7262745098039	1.71104790506716	0	0
10113	PREB	7.67709677419355	25.1101960784314	1.70964055493013	0	0
23048	FNBP1	13.8193548387097	45.1725490196078	1.70875606061446	0	0
4245	MGAT1	9.43193548387097	30.8129411764706	1.70791064282377	0	0
201292	TRIM65	4.53870967741935	14.8205882352941	1.70724859686976	0	0
80741	LY6G5C	2.39161290322581	7.80392156862745	1.7062153789146	0	0
23604	DAPK2	1.56741935483871	5.10882352941177	1.70459988561701	0	0
5797	PTPRM	8.00548387096774	26.0247058823529	1.70082134853415	0	0
7248	TSC1	13.2332258064516	42.9211764705882	1.69752483690298	0	0
54965	PIGX	15.9645161290323	51.776862745098	1.69743872564716	0	0
497661	C18orf32	2.76451612903226	8.9643137254902	1.69716615111767	0	0
3757	KCNH2	1.44709677419355	4.69137254901961	1.69684866706285	0	0
283459	GATC	10.4377419354839	33.8096078431373	1.69562364446862	0	0
192670	AGO4	11.0693548387097	35.7864705882353	1.69284312695475	0	0
389206	BEND4	1	3.23039215686275	1.69170931303656	0	0
51174	TUBD1	9.46612903225807	30.5433333333333	1.69001102600388	0	0
83860	TAF3	17.3183870967742	55.79	1.68770197673926	0	0
60686	C14orf93	4.17290322580645	13.43	1.68633593634066	0	0
51310	SLC22A17	39.8354838709677	128.149215686275	1.68569864473812	0	0
8859	STK19	1.53290322580645	4.92941176470588	1.68514887692248	0	0
9703	KIAA0100	12.0564516129032	38.7503921568627	1.68440554683109	1	0
27439	CECR6	9.7341935483871	31.2737254901961	1.68381772527366	0	0
83939	EIF2A	27.6674193548387	88.8817647058823	1.6836993764631	0	0
22877	MLXIP	18.9945161290323	61.0066666666667	1.68338394474605	0	0
8522	GAS7	8.66516129032258	27.8058823529412	1.68209160975785	0	0
64097	EPB41L4A	10.2590322580645	32.876862745098	1.68017799038265	0	0
115939	TSR3	2.62225806451613	8.39960784313725	1.67951230098765	0	0
64423	INF2	6.88548387096774	22.0460784313725	1.67889210412657	0	0
6405	SEMA3F	3.68225806451613	11.7841176470588	1.67818109468035	0	0
23759	PPIL2	3.50322580645161	11.2088235294118	1.67787897414435	0	0
54776	PPP1R12C	8.93258064516129	28.5725490196078	1.67748080906928	0	0
9575	CLOCK	9.41096774193548	30.0996078431373	1.67732970087338	0	0
83874	TBC1D10A	4.08225806451613	13.0545098039216	1.67710899360447	0	0
57658	CALCOCO1	8.63	27.5843137254902	1.67641562336222	0	0
56127	PCDHB9	3.55548387096774	11.361568627451	1.6760442165462	0	0
285440	CYP4V2	3.43354838709677	10.9649019607843	1.67512071269282	0	0
196394	AMN1	9.2258064516129	29.4556862745098	1.67479923457729	0	0
80311	KLHL15	2.51032258064516	8.01470588235294	1.67477681360269	0	0
100129387	GABPB1-AS1	19.398064516129	61.9319607843137	1.67477141135985	0	0
1141	CHRNB2	1.30354838709677	4.15941176470588	1.6739353769244	0	0
23062	GGA2	6.02870967741935	19.2350980392157	1.6738200221414	0	0
9991	PTBP3	10.0535483870968	32.0517647058824	1.67269900226371	0	0
56907	SPIRE1	26.7477419354839	85.2037254901961	1.67149940969519	0	0
3762	KCNJ5	2.31806451612903	7.38156862745098	1.67100671034369	0	0
257160	RNF214	13.6206451612903	43.3376470588235	1.66982578669567	0	0
126526	C19orf47	3.83096774193548	12.1878431372549	1.66966205421766	0	0
119016	AGAP4	4.11645161290323	13.0949019607843	1.66953208547847	0	0
133	ADM	2.88677419354839	9.17745098039216	1.66863524056963	0	0
51303	FKBP11	2.80612903225806	8.91470588235294	1.66760585173199	0	0
9129	PRPF3	16.0909677419355	51.0947058823529	1.66692272062071	0	0
7760	ZNF213	4.44451612903226	14.0956862745098	1.66515545224497	0	0
219527	LRRC55	1.26612903225806	4.01156862745098	1.66374203970437	0	0
8028	MLLT10	23.9648387096774	75.9078431372549	1.66332972880205	0	0
10949	HNRNPA0	52.2229032258065	165.250784313725	1.66190255039081	0	0
163033	ZNF579	6.82451612903226	21.5927450980392	1.66174800067361	0	0
79753	SNIP1	1.60645161290323	5.0821568627451	1.66156337862732	0	0
160	AP2A1	1.65129032258065	5.21098039215686	1.65796103538637	0	0
94015	TTYH2	2.00322580645161	6.32078431372549	1.65777853319613	0	0
23274	CLEC16A	6.25709677419355	19.7390196078431	1.6574850137061	0	0
56970	ATXN7L3	7.45193548387097	23.5080392156863	1.65746712099829	0	0
2746	GLUD1	17.1174193548387	53.9866666666667	1.6571379268048	0	0
3106	HLA-B	1.65161290322581	5.20862745098039	1.65702765675253	0	0
79786	KLHL36	4.78645161290323	15.0933333333333	1.6568830273865	0	0
8321	FZD1	1.40032258064516	4.41509803921569	1.65668626682321	0	0
338811	FAM19A2	4.56967741935484	14.3994117647059	1.65584564494206	0	0
1105	CHD1	18.1493548387097	57.1833333333333	1.65567645490064	1	0
3786	KCNQ3	36.5635483870968	115.148235294118	1.65501430955455	0	1
4015	LOX	1.90322580645161	5.99352941176471	1.654959074612	0	0
8315	BRAP	6.95322580645161	21.8860784313725	1.65425912717073	0	0
6940	ZNF354A	7.82161290322581	24.6143137254902	1.65395947316481	0	0
23060	ZNF609	22.8512903225806	71.7913725490196	1.65153484923627	0	0
7988	ZNF212	4.23064516129032	13.283137254902	1.65064633527063	0	0
57213	SPRYD7	10.0393548387097	31.47	1.6483106186007	0	0
440288	UBL7-AS1	5.23774193548387	16.4080392156863	1.64738596031714	0	0
83259	PCDH11Y	6.32290322580645	19.8062745098039	1.64729849605701	0	0
149603	RNF187	46.5932258064516	145.931764705882	1.64710182461469	0	0
126792	B3GALT6	11.3590322580645	35.5390196078431	1.64556395470423	0	0
10740	RFPL1S	6.55387096774194	20.5045098039216	1.64552207936479	0	0
54704	PDP1	6.71161290322581	20.9960784313725	1.6453884770085	0	0
4185	ADAM11	1.5041935483871	4.70549019607843	1.64535480986235	0	0
133686	NADK2	12.7651612903226	39.9147058823529	1.64470861380456	0	0
399664	MEX3D	8.7158064516129	27.2492156862745	1.64450864084243	0	0
114034	TOE1	3.77741935483871	11.801568627451	1.6435057704881	0	0
51754	TMEM8B	9.30935483870968	29.0835294117647	1.64344926311841	0	0
9666	DZIP3	10.3790322580645	32.3882352941176	1.64179793062403	0	0
57185	NIPAL3	1.99612903225806	6.22333333333333	1.64048254044288	0	0
81559	TRIM11	1.73096774193548	5.39039215686275	1.63881139532241	0	0
256471	MFSD8	3.85548387096774	12.0009803921569	1.63816843052085	0	0
57404	CYP20A1	53.8854838709677	167.704509803922	1.63795290047575	0	0
375704	ENHO	15.5	48.2394117647059	1.63794409950557	0	0
148867	SLC30A7	9.42032258064516	29.308431372549	1.6374673869907	0	0
1410	CRYAB	1	3.11	1.63691458035588	0	0
83480	PUS3	6.00096774193548	18.6482352941176	1.63577203308082	0	0
10984	KCNQ1OT1	71.9509677419355	223.432156862745	1.63475084022113	0	0
152185	SPICE1	8.4958064516129	26.376862745098	1.63445017647284	0	0
9495	AKAP5	1.34064516129032	4.16137254901961	1.63413201343807	0	0
100506190	LINC00963	6.59806451612903	20.48	1.63410092552577	0	0
23399	CTDNEP1	24.3506451612903	75.5717647058824	1.633887315641	0	0
9448	MAP4K4	104.625161290323	324.591764705882	1.63339655055609	0	0
55699	IARS2	10.6354838709677	32.966862745098	1.63213092955948	0	0
51430	SUCO	15.9641935483871	49.4725490196078	1.6317885595466	0	0
54916	TMEM260	5.14258064516129	15.9329411764706	1.63144819076211	0	0
84552	PARD6G	9.43935483870968	29.193137254902	1.62886909639798	0	0
92181	UBTD2	14.898064516129	46.0419607843137	1.627824359727	0	0
2321	FLT1	1.92516129032258	5.94921568627451	1.62772016343514	0	0
57532	NUFIP2	21.988064516129	67.9127450980392	1.62696173104411	0	0
84549	MAK16	4.16903225806452	12.8623529411765	1.62537014226741	0	0
29915	HCFC2	4.84612903225806	14.9376470588235	1.62404819289154	0	0
23064	SETX	22.9909677419355	70.8247058823529	1.6231855118189	0	1
10233	LRRC23	1.31774193548387	4.05745098039216	1.62250580225982	0	0
83690	CRISPLD1	8.63967741935484	26.5766666666667	1.6211108159488	0	0
145482	PTGR2	2.48032258064516	7.62941176470588	1.62104406426286	0	0
81037	CLPTM1L	8.21451612903226	25.2507843137255	1.6200806983245	0	0
81533	ITFG1	16.0416129032258	49.2880392156863	1.61941838384434	0	0
11221	DUSP10	4.74258064516129	14.5692156862745	1.61917900273571	0	0
5467	PPARD	2.22129032258065	6.82235294117647	1.61887142649901	0	0
7709	ZBTB17	11.6029032258065	35.5958823529412	1.61722452818004	0	0
51768	TM7SF3	11.5032258064516	35.266862745098	1.61627475534362	0	0
22932	POMZP3	4.45451612903226	13.6401960784314	1.61452375042109	0	0
55666	NPLOC4	20.5251612903226	62.8288235294118	1.61403300685371	0	0
23418	CRB1	17.7674193548387	54.3707843137255	1.61359748854923	0	0
25782	RAB3GAP2	27.7338709677419	84.8686274509804	1.61358235021648	0	0
904	CCNT1	7.36935483870968	22.5223529411765	1.61174732857923	0	0
10189	ALYREF	15.1429032258065	46.2676470588235	1.6113619044721	0	0
83642	SELO	5.58903225806452	17.0750980392157	1.6112234550865	0	0
64083	GOLPH3	13.2748387096774	40.5250980392157	1.61012134366789	0	0
4093	SMAD9	7.37451612903226	22.5094117647059	1.6099080588461	0	0
8450	CUL4B	18.6232258064516	56.8262745098039	1.60945514667285	0	0
283652	SLC24A5	4.78354838709677	14.5950980392157	1.60933080503303	0	0
26033	ATRNL1	1.22258064516129	3.72803921568627	1.60848740305525	0	0
23335	WDR7	2.59032258064516	7.89509803921569	1.6078254089548	0	0
5420	PODXL	9.25612903225806	28.2035294117647	1.6073948327584	0	0
84233	TMEM126A	20.331935483871	61.91	1.6064249012518	0	0
55193	PBRM1	40.6361290322581	123.705294117647	1.60607235981394	0	0
1840	DTX1	14.3151612903226	43.4592156862745	1.60211821284712	0	0
1793	DOCK1	3.90935483870968	11.8647058823529	1.60167389343176	0	0
79896	THNSL1	4.89935483870968	14.8676470588235	1.60151265719518	0	0
90338	ZNF160	23.5264516129032	71.3501960784314	1.60063365252084	0	0
55974	SLC50A1	3.09161290322581	9.36274509803922	1.59857188832443	0	0
64168	NECAB1	6.27774193548387	19.0054901960784	1.59809860701124	0	0
54778	RNF111	9.56483870967742	28.948431372549	1.59767262911924	0	0
59283	CACNG8	9.69967741935484	29.3233333333333	1.59604043759226	0	0
1809	DPYSL3	122.825483870968	371.038039215686	1.59495717846641	0	0
5137	PDE1C	1.28290322580645	3.87078431372549	1.59321357395797	0	0
1174	AP1S1	4.56451612903226	13.7656862745098	1.59254269828587	0	0
55717	WDR11	11.9158064516129	35.8952941176471	1.59091812355008	0	0
1520	CTSS	1.56193548387097	4.70470588235294	1.59076967094773	0	0
9785	DHX38	26.5141935483871	79.8405882352941	1.59035748158981	0	0
146880	LOC146880	6.72225806451613	20.2401960784314	1.59020543307064	0	0
55230	USP40	8.49451612903226	25.5596078431373	1.58926202643085	0	0
57215	THAP11	10.9845161290323	33.0433333333333	1.5888879097168	0	0
55521	TRIM36	35.5945161290323	106.948431372549	1.58718842791179	0	0
868	CBLB	7.85806451612903	23.5939215686275	1.58616931250731	0	0
4123	MAN2C1	11.6187096774194	34.8582352941176	1.58504967625721	0	0
2744	GLS	16.8006451612903	50.3966666666667	1.58481167925545	0	0
22926	ATF6	16.7987096774194	50.3752941176471	1.58436593420506	0	0
390	RND3	78.3809677419355	234.87137254902	1.58329558963092	0	0
4783	NFIL3	18.7541935483871	56.161568627451	1.58237000476404	0	0
79885	HDAC11	2.04064516129032	6.10941176470588	1.58200813870694	0	0
1846	DUSP4	8.96064516129032	26.8062745098039	1.58089621561497	0	0
79178	THTPA	11.2603225806452	33.6701960784314	1.58022396503918	0	0
1031	CDKN2C	5.80774193548387	17.3598039215686	1.57970139834337	0	0
80725	SRCIN1	9.82290322580645	29.3266666666667	1.57799170952527	0	0
55670	PEX26	1.38806451612903	4.14352941176471	1.57778553801944	0	0
140612	ZFP28	6.47451612903226	19.2988235294118	1.57566861984355	0	0
8786	RGS11	1.09322580645161	3.2578431372549	1.57532571951078	0	0
79832	QSER1	31.4348387096774	93.6698039215686	1.57521968442649	0	0
604	BCL6	1.23645161290323	3.68313725490196	1.57472937872491	0	0
255812	SDHAP1	2.66838709677419	7.93470588235294	1.57220877717493	0	0
3776	KCNK2	1	2.97352941176471	1.57217634576531	0	0
27087	B3GAT1	34.6748387096774	103.062352941176	1.57155635812629	0	0
23102	TBC1D2B	1.35516129032258	4.0278431372549	1.57154292893063	0	0
114294	LACTB	10.6764516129032	31.7250980392157	1.57119238464653	0	0
150094	SIK1	1.21387096774194	3.60627450980392	1.57089414506568	0	0
51729	WBP11	28.3832258064516	84.2805882352941	1.57016181976828	0	0
158427	TSTD2	4.15935483870968	12.3441176470588	1.56939204376086	0	0
440465	BAIAP2-AS1	16.4754838709677	48.8921568627451	1.56928221422273	0	0
256435	ST6GALNAC3	7.61806451612903	22.598431372549	1.5687262231518	0	0
3915	LAMC1	4.43709677419355	13.1594117647059	1.56840707684036	0	0
481	ATP1B1	16.7254838709677	49.5701960784314	1.56742501662965	0	0
221935	SDK1	13.02	38.571568627451	1.56680837013689	0	0
79709	COLGALT1	16.0954838709677	47.6750980392157	1.56657995677296	0	0
441272	SPDYE3	1.61225806451613	4.77137254901961	1.56532165049972	0	0
148327	CREB3L4	4.53612903225806	13.4190196078431	1.56474568814625	0	0
953	ENTPD1	13.8135483870968	40.8394117647059	1.56387812351835	0	0
3176	HNMT	1	2.95647058823529	1.56387592485559	0	0
7064	THOP1	17.5112903225806	51.7643137254902	1.56367245490558	0	0
388228	SBK1	66.0712903225807	195.309215686275	1.56366459969947	0	0
6622	SNCA	27.7206451612903	81.8849019607843	1.56263663581396	0	0
51351	ZNF117	11.0438709677419	32.6147058823529	1.56227668118041	0	0
23085	ERC1	26.5461290322581	78.3801960784314	1.56198768007069	0	0
253558	LCLAT1	11.081935483871	32.6372549019608	1.55830984509589	0	0
256714	MAP7D2	15.6370967741935	46.0452941176471	1.55808103591508	0	0
3098	HK1	26.4464516129032	77.8739215686275	1.55806611392433	0	0
5900	RALGDS	15.2622580645161	44.9117647058824	1.55712498469393	0	0
23271	CAMSAP2	26.8067741935484	78.8758823529412	1.55698661669492	0	0
90410	IFT20	3.24612903225806	9.54509803921569	1.55603966831064	0	0
51710	ZNF44	10.06	29.5756862745098	1.55578134011968	0	1
54495	TMX3	9.19516129032258	27.0305882352941	1.55564612193916	0	0
56853	CELF4	30.1364516129032	88.5374509803922	1.55477828019813	1	0
56254	RNF20	39.2003225806452	115.154509803922	1.55463348111816	0	0
27075	TSPAN13	59.5341935483871	174.874117647059	1.55452635255723	0	0
4216	MAP3K4	24.1996774193548	71.0586274509804	1.55402200566927	0	0
9927	MFN2	14.3790322580645	42.1874509803922	1.552847338365	0	0
65997	RASL11B	10.6558064516129	31.2292156862745	1.55125655375283	0	0
22808	MRAS	14.7648387096774	43.2582352941176	1.55080921558417	0	0
25962	KIAA1429	16.7383870967742	49.0207843137255	1.55023304979617	0	0
27183	VPS4A	24.8990322580645	72.91	1.55002703087242	0	0
9823	ARMCX2	20.088064516129	58.7833333333333	1.54906860274805	0	0
5424	POLD1	26.4793548387097	77.4505882352941	1.54840822453455	0	0
440	ASNS	26.7225806451613	78.1454901960784	1.5481032791265	0	0
57584	ARHGAP21	72.8306451612903	212.953725490196	1.54792243888911	0	0
3475	IFRD1	14.948064516129	43.6923529411765	1.54742210502346	0	0
284260	LINC00907	2.73322580645161	7.98666666666667	1.54698884872861	0	0
100506930	LINC00665	5.72451612903226	16.723137254902	1.54661986380703	0	0
352954	GATS	11.5448387096774	33.7235294117647	1.54650751498586	0	0
55573	CDV3	28.4206451612903	83.0158823529412	1.54644807023993	0	0
153090	DAB2IP	13.8441935483871	40.3409803921569	1.54296512935176	0	0
23252	OTUD3	7.64677419354839	22.2782352941176	1.54271178072999	0	0
25759	SHC2	8.42258064516129	24.5333333333333	1.54240902340989	0	0
6014	RIT2	1.02967741935484	2.99843137254902	1.54201551702768	0	0
2801	GOLGA2	18.4758064516129	53.7901960784314	1.54170590988316	0	0
59339	PLEKHA2	4.21483870967742	12.2692156862745	1.54149369783217	0	0
29106	SCG3	78.9241935483871	229.659215686275	1.54095515750099	0	0
4860	PNP	9.93838709677419	28.9013725490196	1.54005436850755	0	0
50485	SMARCAL1	3.34225806451613	9.7178431372549	1.53981301308753	0	0
26091	HERC4	7.76096774193548	22.5535294117647	1.53904475575006	0	0
317762	CCDC85C	11.4777419354839	33.3298039215686	1.53797398767596	0	0
81794	ADAMTS10	4.35483870967742	12.6450980392157	1.53788703068458	0	0
1183	CLCN4	7.81064516129032	22.6645098039216	1.53692133305834	0	1
23390	ZDHHC17	19.3312903225806	56.0809803921569	1.53657363277024	0	0
2686	GGT7	4.28322580645161	12.4225490196078	1.53619159332732	0	0
54681	P4HTM	10.188064516129	29.5454901960784	1.53605793454878	0	0
3267	AGFG1	18.5690322580645	53.8309803921569	1.53553807068379	0	0
51429	SNX9	2.21451612903226	6.41764705882353	1.53505294531304	0	0
54521	WDR44	4.60096774193548	13.3282352941176	1.53447652846213	0	0
60685	ZFAND3	22.7358064516129	65.8533333333333	1.53429028981519	0	0
23164	MPRIP	28.851935483871	83.5072549019608	1.53323343787455	0	0
54487	DGCR8	15.1803225806452	43.9362745098039	1.53321009621802	1	0
81537	SGPP1	5.83387096774194	16.8807843137255	1.53285655349615	0	0
7328	UBE2H	36.2293548387097	104.832352941176	1.53285300430283	0	0
23122	CLASP2	49.4367741935484	142.938235294118	1.53173536816639	0	0
9711	KIAA0226	6.59387096774194	19.0364705882353	1.52956846298102	0	0
340542	BEX5	21.8193548387097	62.9249019607843	1.52802261936988	0	0
7423	VEGFB	14.1264516129032	40.7309803921569	1.52772741602289	0	0
8760	CDS2	25.9935483870968	74.9349019607843	1.52748424028108	0	1
5526	PPP2R5B	3.22677419354839	9.29627450980392	1.52656004773916	0	0
6619	SNAPC3	20.3570967741935	58.6429411764706	1.52642563593367	0	0
283464	GXYLT1	6.18451612903226	17.8025490196078	1.52535119559135	0	0
55188	RIC8B	7.19032258064516	20.6945098039216	1.52511967439312	0	0
414235	PRR26	11.9854838709677	34.4807843137255	1.52450443711336	0	0
4335	MNT	9.39483870967742	26.9921568627451	1.52259996404516	0	0
10742	RAI2	1.30354838709677	3.73843137254902	1.51998891329942	0	0
254065	BRWD3	14.548064516129	41.7196078431373	1.51989836802277	0	0
10640	EXOC5	33.788064516129	96.8482352941176	1.51921205033654	0	0
84826	SFT2D3	4.96516129032258	14.2311764705882	1.51914244356673	0	0
4943	TBC1D25	9.18	26.3029411764706	1.51865807093554	0	0
26608	TBL2	6.24129032258065	17.866862745098	1.5173701053912	0	0
60312	AFAP1	8.33225806451613	23.83	1.51599952357178	0	0
22884	WDR37	4.46483870967742	12.7635294117647	1.51534735821346	0	0
23528	ZNF281	38.8761290322581	111.120784313725	1.51517220790472	0	0
548645	DNAJC25	1.5258064516129	4.36	1.51475616693704	0	0
51193	ZNF639	11.3093548387097	32.3158823529412	1.51472675280856	0	0
84928	TMEM209	9.23774193548387	26.3929411764706	1.51453998177021	0	0
60677	CELF6	2.63677419354839	7.52725490196078	1.51334979966976	0	0
79661	NEIL1	1.09451612903226	3.12352941176471	1.51288390011708	0	0
11120	BTN2A1	8.10322580645161	23.1245098039216	1.51285453480392	0	0
6857	SYT1	154.245483870968	440.065294117647	1.5124893480846	0	0
9969	MED13	36.6558064516129	104.540392156863	1.51194682509378	3+	0
4603	MYBL1	1.88096774193548	5.36313725490196	1.51160206842562	0	0
11083	DIDO1	16.6154838709677	47.366862745098	1.51134981353677	0	0
11341	SCRG1	2.04612903225806	5.83254901960784	1.51122940070717	0	0
726	CAPN5	1.27967741935484	3.64725490196078	1.51103084931738	0	0
9135	RABEP1	47.9093548387097	136.372352941176	1.50917190239079	0	0
9554	SEC22B	5.95096774193548	16.9392156862745	1.50917087444525	0	0
51750	RTEL1	3.99129032258065	11.3588235294118	1.50888628991122	0	0
121457	IKBIP	5.2358064516129	14.8882352941176	1.50768908880045	0	0
127829	ARL8A	17.341935483871	49.2494117647059	1.50584157049582	0	0
9868	TOMM70A	13.8806451612903	39.4080392156863	1.50541534381668	0	0
965	CD58	2.27096774193548	6.4378431372549	1.50327021156352	0	0
163882	CNST	8.31774193548387	23.5723529411765	1.50283194243004	0	0
26469	PTPN18	4.83161290322581	13.6847058823529	1.50198764872971	0	0
197407	ZNF48	10.3883870967742	29.4052941176471	1.50110424221196	0	0
23276	KLHL18	5.58548387096774	15.8090196078431	1.5009937300845	0	0
23023	TMCC1	13.8029032258065	39.0574509803922	1.50062604984119	0	0
51466	EVL	81.0922580645161	229.236862745098	1.49920296627647	0	0
3486	IGFBP3	2.6041935483871	7.36019607843137	1.49890752454053	0	0
9762	LZTS3	4.4141935483871	12.4723529411765	1.49851186522161	0	0
644128	RPL23AP53	9.60709677419355	27.1370588235294	1.49809194127847	0	0
4775	NFATC3	13.0725806451613	36.9247058823529	1.49804245924342	0	0
285193	DUSP28	7.01612903225806	19.808431372549	1.49736745243099	0	0
57611	ISLR2	6.27258064516129	17.7088235294118	1.4973373517861	0	0
3416	IDE	9.17096774193548	25.8809803921569	1.49674638528718	0	0
57498	KIDINS220	108.82	306.849019607843	1.49558524051688	0	0
81855	SFXN3	6.29838709677419	17.7570588235294	1.49533830894976	0	0
1398	CRK	32.8522580645161	92.6166666666667	1.49527929841173	0	0
147687	ZNF417	2.33870967741935	6.59294117647059	1.4952094297777	0	0
57182	ANKRD50	8.48903225806452	23.9309803921569	1.49520749933339	0	0
148213	ZNF681	6.96935483870968	19.6435294117647	1.49495715085316	0	0
6252	RTN1	168.303870967742	474.242941176471	1.49455794128783	0	1
54799	MBTD1	10.8287096774194	30.5076470588235	1.49430956934054	0	0
8936	WASF1	34.318064516129	96.6174509803921	1.4933156017829	0	0
280	AMY2B	2.27096774193548	6.39352941176471	1.49330534678632	0	0
10938	EHD1	11.5709677419355	32.5721568627451	1.49312972546626	0	0
8898	MTMR2	7.30258064516129	20.5252941176471	1.49092460479877	0	0
2782	GNB1	91.3561290322581	256.588039215686	1.48988049431703	0	0
22904	SBNO2	3.30483870967742	9.27764705882353	1.48917910034574	0	0
8976	WASL	15.951935483871	44.7625490196078	1.48856071343276	0	0
55075	UACA	20.06	56.2829411764706	1.48837611547861	0	0
23312	DMXL2	27.2403225806452	76.4045098039216	1.48791400848741	0	0
2768	GNA12	11.3370967741935	31.7841176470588	1.48725479917745	0	0
90411	MCFD2	17.6825806451613	49.541568627451	1.48631070811478	0	0
1122	CHML	9.96064516129032	27.9062745098039	1.48627844205665	0	1
58486	ZBED5	43.2038709677419	121.016862745098	1.48597560422019	0	0
27005	USP21	8.39	23.4935294117647	1.48552074863061	0	0
83696	TRAPPC9	11.7077419354839	32.7686274509804	1.48485239429938	0	0
10991	SLC38A3	5.06161290322581	14.1649019607843	1.48465153261084	1	0
23514	SPIDR	27.6896774193548	77.4774509803921	1.48442824322255	0	0
56683	C21orf59	153.990967741935	430.57431372549	1.48341652398672	0	0
10982	MAPRE2	42.2870967741936	118.171764705882	1.48259594680986	0	0
90321	ZNF766	9.26064516129032	25.8701960784314	1.48210637838503	0	0
166378	SPATA5	8.7258064516129	24.3721568627451	1.4818735523402	0	0
54540	FAM193B	16.8690322580645	47.1094117647059	1.48163810626492	0	0
84134	TOMM40L	8.57774193548387	23.9543137254902	1.48161566411901	0	0
6804	STX1A	15.4148387096774	43.0466666666667	1.4815817322136	0	0
205564	SENP5	17.7154838709677	49.4586274509804	1.48121133242063	0	0
2669	GEM	1	2.79117647058824	1.48087334088341	0	0
55810	FOXJ2	5.68645161290323	15.8701960784314	1.48071936674822	0	0
4782	NFIC	13.2341935483871	36.9288235294118	1.48047701815255	0	0
87178	PNPT1	16.3129032258065	45.5056862745098	1.48003326910316	0	0
3096	HIVEP1	9.64838709677419	26.9129411764706	1.47994036933311	0	0
9605	VPS9D1	4.00129032258065	11.146862745098	1.47810050902505	0	0
1108	CHD4	111.903870967742	311.545490196078	1.47718289045393	0	1
9362	CPNE6	9.47387096774194	26.3656862745098	1.47663562128529	0	0
112869	CCDC101	19.7535483870968	54.9613725490196	1.47630620093731	0	0
55783	CMTR2	10.6751612903226	29.6927450980392	1.47585260923265	0	0
6659	SOX4	1596.88387096774	4439.61980392157	1.47517673317943	0	0
10388	SYCP2	5.82387096774194	16.176862745098	1.47388154927009	0	0
9092	SART1	13.6103225806452	37.7233333333333	1.47075590117291	0	0
79856	SNX22	1.52290322580645	4.21980392156863	1.47035169643019	0	0
80820	EEPD1	4.28903225806452	11.8833333333333	1.47021550422662	0	0
10472	ZBTB18	93.8235483870968	259.905098039216	1.46996296314999	0	0
729993	SHISA9	74.2635483870968	205.66137254902	1.46954469602439	0	0
22871	NLGN1	16.0403225806452	44.4076470588235	1.46910497650894	0	0
5423	POLB	33.5609677419355	92.896862745098	1.4688455586532	0	0
84705	GTPBP3	3.69290322580645	10.2180392156863	1.46829101608462	0	0
23074	UHRF1BP1L	10.7961290322581	29.8592156862745	1.46766214591652	0	1
1641	DCX	116.352580645161	321.673921568627	1.46709577058872	0	0
1121	CHM	12.2258064516129	33.7978431372549	1.46700154868537	1	0
51479	ANKFY1	8.09806451612903	22.383137254902	1.46676321892071	0	0
2671	GFER	7.41193548387097	20.4849019607843	1.46663875940321	0	0
23015	GOLGA8A	26.8254838709677	74.1027450980392	1.46592279324879	0	0
896	CCND3	5.46935483870968	15.0856862745098	1.46373775985885	0	0
728747	ANKRD20A4	3.02129032258065	8.32941176470588	1.46304979140783	0	0
23373	CRTC1	11.7922580645161	32.5098039215686	1.46303485247223	0	0
5754	PTK7	7.10354838709677	19.5819607843137	1.46291346296509	1	0
2783	GNB2	65.331935483871	179.987843137255	1.46203918046078	0	0
221092	HNRNPUL2	20.9696774193548	57.7270588235294	1.46094305398961	0	0
9344	TAOK2	7.21709677419355	19.8564705882353	1.4601187069911	2	0
1113	CHGA	18.98	52.2178431372549	1.46006287587293	0	0
127687	C1orf122	36.4470967741935	100.172941176471	1.45861705371864	0	0
6314	ATXN7	12.9709677419355	35.6366666666667	1.4580762777146	0	0
5195	PEX14	9.18451612903226	25.2258823529412	1.45762911045651	0	0
64428	NARFL	13.2716129032258	36.4349019607843	1.4569773961511	0	0
207	AKT1	30.0396774193548	82.4156862745098	1.45604963281205	0	0
57482	KIAA1211	20.3835483870968	55.9041176470588	1.45554933037762	0	0
2054	STX2	8.96903225806452	24.5964705882353	1.45542707980168	0	0
5452	POU2F2	20.5793548387097	56.4123529411765	1.45481335799059	0	0
6664	SOX11	435.61935483871	1193.92607843137	1.45457355491593	0	0
51	ACOX1	13.7574193548387	37.6645098039216	1.45299588136384	0	0
25	ABL1	19.7625806451613	54.0049019607843	1.45031901513314	0	0
414	ARSD	12.428064516129	33.9556862745098	1.45005155490252	0	0
5670	PSG2	1.29741935483871	3.54411764705882	1.44978162883587	0	0
10290	SPEG	6.3958064516129	17.4480392156863	1.44786673155854	0	0
11104	KATNA1	11.0464516129032	30.1337254901961	1.44779603157398	0	0
78987	CRELD1	15.7396774193548	42.9280392156863	1.44751430416045	0	0
4139	MARK1	24.6070967741935	67.083137254902	1.4468757065678	0	0
57144	PAK7	24.9758064516129	68.0641176470588	1.44636316967384	0	0
1729	DIAPH1	11.6383870967742	31.7105882352941	1.44607350332443	0	0
22992	KDM2A	20.31	55.3319607843137	1.44592280946175	0	0
6416	MAP2K4	15.3825806451613	41.8635294117647	1.44439639073767	0	0
9745	ZNF536	5.00322580645161	13.6056862745098	1.443279257478	1	0
84898	PLXDC2	7.73129032258064	21.0188235294118	1.44290080108609	0	0
2798	GNRHR	5.59548387096774	15.2078431372549	1.44248075721133	0	0
1582	CYP8B1	1.31741935483871	3.58039215686274	1.44240296240916	0	0
26523	AGO1	19.7477419354839	53.6666666666667	1.44233858540491	0	0
7597	ZBTB25	1.93258064516129	5.24705882352941	1.44098034577907	0	0
25837	RAB26	5.00741935483871	13.5947058823529	1.44090575285761	0	0
5893	RAD52	4.63290322580645	12.5745098039216	1.44051370796439	0	0
55222	LRRC20	7.82290322580645	21.2203921568627	1.43967529462376	0	0
8738	CRADD	3.80193548387097	10.3113725490196	1.43943042713303	0	0
950	SCARB2	43.5945161290323	118.146470588235	1.43835796100048	0	0
4613	MYCN	19.5067741935484	52.8545098039216	1.43805135329759	0	0
51082	POLR1D	53.568064516129	145.05568627451	1.43716177553827	0	0
375133	PI4KAP2	23.2316129032258	62.8592156862745	1.43603495156123	0	0
10560	SLC19A2	1.90903225806452	5.16411764705882	1.43568038694333	0	0
10243	GPHN	14.7129032258065	39.7841176470588	1.43511064780935	0	1
26751	SH3YL1	9.49806451612903	25.6633333333333	1.43400310899847	0	0
6326	SCN2A	5.62161290322581	15.1788235294118	1.43300395540528	3+	2+
3398	ID2	114.566774193548	309.236862745098	1.43252360171135	0	0
6521	SLC4A1	1.10612903225807	2.98529411764706	1.4323533871608	0	0
7107	GPR137B	3.19935483870968	8.62745098039216	1.43115336170129	0	0
65124	SOWAHC	8.15677419354839	21.9913725490196	1.43086703084062	0	0
256643	CXorf23	12.6351612903226	34.0392156862745	1.42975371489903	0	0
79834	PEAK1	1.44	3.87901960784314	1.42962325682008	0	0
3780	KCNN1	7.15548387096774	19.2707843137255	1.42929405611855	0	0
142891	SAMD8	18.5803225806452	49.9986274509804	1.42811294178875	0	0
56926	NCLN	15.3470967741935	41.281568627451	1.42753202636533	0	0
310	ANXA7	9.2	24.7405882352941	1.42717403613599	0	0
84193	SETD3	7.83064516129032	21.0160784313725	1.42429040954377	0	0
653121	ZBTB8A	18.4290322580645	49.4141176470588	1.42294296523427	0	0
23654	PLXNB2	55.5706451612903	148.794705882353	1.42092830142322	0	1
26053	AUTS2	123.509032258065	330.614117647059	1.4205317804219	0	0
122553	TRAPPC6B	16.8570967741935	45.1176470588235	1.42033574289864	0	0
100288152	LOC100288152	5.34451612903226	14.2850980392157	1.41837969441215	0	0
9383	TSIX	2.49129032258065	6.65549019607843	1.41765177282899	0	0
6687	SPG7	25.0806451612903	66.9811764705882	1.41718125630355	0	1
10014	HDAC5	32.6229032258064	87.1074509803922	1.41691095085263	0	0
84957	RELT	5.18483870967742	13.8403921568627	1.41651380581604	0	0
9715	FAM131B	15.0596774193548	40.1949019607843	1.41632166410786	0	0
80218	NAA50	22.6022580645161	60.3219607843137	1.41621641323474	0	0
57117	INTS12	15.6390322580645	41.6998039215686	1.41488935836232	0	0
4762	NEUROG1	29.4083870967742	78.3592156862745	1.41387529566872	0	0
84446	BRSK1	2.58451612903226	6.88627450980392	1.41382948702539	1	0
3801	KIFC3	1	2.66372549019608	1.41344541336312	0	0
27	ABL2	26.208064516129	69.7986274509804	1.41318785339929	0	0
1268	CNR1	14.8267741935484	39.4829411764706	1.41302471341349	0	0
2026	ENO2	50.8293548387097	135.200588235294	1.41136760422718	0	0
100132352	LOC100132352	2.93774193548387	7.81274509803922	1.41112187635922	0	0
51299	NRN1	36.041935483871	95.8335294117647	1.41085401479215	0	0
23235	SIK2	3.51741935483871	9.35156862745098	1.41069103560077	0	0
7553	ZNF7	7.71806451612903	20.5145098039216	1.41033367262826	0	0
10325	RRAGB	7.62709677419355	20.2725490196078	1.41032159087424	0	0
9988	DMTF1	11.9512903225806	31.76	1.41004452511219	0	0
55565	ZNF821	19.8490322580645	52.7194117647059	1.40926560274671	0	0
9236	CCPG1	3.7341935483871	9.91098039215686	1.40823106919947	1	0
728215	FAM155A	2.75064516129032	7.29941176470588	1.40801016556555	0	0
83641	FAM107B	17.2616129032258	45.7925490196078	1.40754559974225	0	0
22800	RRAS2	7.8258064516129	20.7596078431373	1.407467855938	0	0
85365	ALG2	4.29935483870968	11.4001960784314	1.40686654801623	0	0
4915	NTRK2	1.35967741935484	3.60294117647059	1.40591068208439	0	0
441024	MTHFD2L	3.35806451612903	8.89254901960784	1.40496707404803	0	0
25956	SEC31B	4.94903225806452	13.0964705882353	1.40395971650534	0	0
59277	NTN4	5.33677419354839	14.1221568627451	1.40392057152663	0	0
2935	GSPT1	42.4845161290323	112.349411764706	1.40298353218605	0	0
11075	STMN2	441.540322580645	1167.62784313725	1.40296341915724	0	0
65264	UBE2Z	6.8158064516129	18.0170588235294	1.40240724602389	0	0
90	ACVR1	15.0638709677419	39.7864705882353	1.40118537744271	0	0
4354	MPP1	5.18322580645161	13.686862745098	1.40086964397198	0	0
10129	FRY	3.12354838709677	8.24490196078431	1.40031645987605	0	0
9712	USP6NL	8.31774193548387	21.9505882352941	1.39999577180823	0	0
9125	RQCD1	19.3729032258064	51.0939215686275	1.39911149733172	0	0
4644	MYO5A	25.8161290322581	68.0688235294118	1.39872148133526	0	0
401247	LINC00243	1.28290322580645	3.37882352941176	1.39710865615437	0	0
3621	ING1	13.6141935483871	35.8507843137255	1.3968931560605	0	0
4885	NPTX2	5.06935483870968	13.3488235294118	1.39683854197421	0	0
23499	MACF1	72.5925806451613	191.080980392157	1.39629017445141	0	0
10900	RUNDC3A	35.8874193548387	94.4349019607843	1.39584197676557	0	0
101929567	LOC101929567	3.38032258064516	8.89176470588235	1.39530884428048	0	0
55728	N4BP2	26.8435483870968	70.5423529411765	1.39391430698771	0	0
4828	NMB	1.50354838709677	3.94960784313725	1.39333811772315	0	0
607	BCL9	7.80903225806452	20.5105882352941	1.3931531911479	0	0
8559	PRPF18	13.171935483871	34.5947058823529	1.39308392464214	0	0
55219	TMEM57	15.7548387096774	41.3596078431373	1.39242752177861	0	0
84298	LLPH	34.5451612903226	90.6752941176471	1.39222587201315	0	0
160851	DGKH	7.56032258064516	19.8437254901961	1.39216320766725	0	0
94030	LRRC4B	9.87774193548387	25.9235294117647	1.39200896758161	0	0
56899	ANKS1B	12.3561290322581	32.4252941176471	1.39189281878587	0	0
140771	SMCR5	21.2012903225806	55.5735294117647	1.39024579642153	0	0
150	ADRA2A	1.16322580645161	3.04862745098039	1.39002867932223	0	0
23117	NPIPB3	1.7758064516129	4.65392156862745	1.38997254928044	0	0
90459	ERI1	14.2070967741935	37.1878431372549	1.38821930591041	0	0
3726	JUNB	2.42483870967742	6.34372549019608	1.3874415548211	0	0
1408	CRY2	6.50806451612903	17.0249019607843	1.38734603238666	0	0
7325	UBE2E2	2.96677419354839	7.76	1.38716152749685	0	0
54795	TRPM4	2.37903225806452	6.22196078431373	1.38699446804076	0	0
100628315	DNM3OS	1	2.61529411764706	1.38697320200193	0	0
4916	NTRK3	39.5509677419355	103.405098039216	1.38652241418614	0	0
6339	SCNN1D	8.41774193548387	22.0062745098039	1.38640974245268	1	0
415	ARSE	4.96322580645161	12.9705882352941	1.38589391146194	0	0
4292	MLH1	23.6774193548387	61.8656862745098	1.38562759470103	0	0
23543	RBFOX2	108.51	283.29862745098	1.38449560821518	0	0
10777	ARPP21	38.0387096774194	99.2550980392157	1.38367289636501	0	0
252969	NEIL2	5.73645161290323	14.9464705882353	1.38157433875249	0	0
663	BNIP2	20.2396774193548	52.7345098039216	1.38156108337413	0	0
55113	XKR8	12.9735483870968	33.7825490196078	1.38070506480122	0	0
5058	PAK1	39.1564516129032	101.949803921569	1.38053706277688	0	0
4004	LMO1	4.80741935483871	12.5160784313725	1.38044804283437	0	0
4760	NEUROD1	103.506774193548	269.383333333333	1.37993540377101	0	0
90120	C9orf69	3.43451612903226	8.93823529411765	1.37988316376409	0	0
7163	TPD52	2.86516129032258	7.45529411764706	1.37964891336327	0	0
400954	EML6	3.70838709677419	9.64882352941176	1.37956120056649	0	0
64748	LPPR2	12.9974193548387	33.8037254901961	1.37895705015633	0	0
342977	NANOS3	1.11838709677419	2.90862745098039	1.37891890088939	0	0
22902	RUFY3	76.4693548387097	198.870980392157	1.37887916347047	0	0
9208	LRRFIP1	45.0187096774194	117.032156862745	1.37830838072912	1	0
441178	LOC441178	6.61354838709677	17.1762745098039	1.37692071542538	0	0
26575	RGS17	6.13451612903226	15.9286274509804	1.37660049874361	0	0
90550	MCU	8.69774193548387	22.578431372549	1.37623244956304	0	0
1501	CTNND2	37.6229032258065	97.6260784313725	1.37565539933717	0	0
8831	SYNGAP1	3.26064516129032	8.45745098039216	1.375065461362	3+	0
57060	PCBP4	35.8141935483871	92.883137254902	1.37488524571476	0	0
55625	ZDHHC7	12.7816129032258	33.1029411764706	1.37288950481696	0	0
8470	SORBS2	36.6764516129032	94.9792156862745	1.37275777556043	0	0
100287846	LOC100287846	4.70903225806452	12.178431372549	1.37082581008986	0	0
3875	KRT18	3.81193548387097	9.8578431372549	1.37074832216026	0	0
58506	SCAF1	5.34741935483871	13.8060784313725	1.36838886008323	0	0
10227	MFSD10	36.9051612903226	95.2480392156863	1.36786679812386	0	0
55139	ANKZF1	12.9293548387097	33.3662745098039	1.36774032434374	0	0
2979	GUCA1B	1.48322580645161	3.82647058823529	1.36727606002351	0	0
55349	CHDH	1.42096774193548	3.66549019607843	1.36713234318799	0	0
146330	FBXL16	6.17516129032258	15.9288235294118	1.36709099191529	0	0
221895	JAZF1	9.58322580645161	24.7147058823529	1.36678646984719	0	0
388561	ZNF761	2.45387096774194	6.32745098039216	1.36656503607837	0	0
4313	MMP2	1.46258064516129	3.77078431372549	1.36634845609429	0	0
1955	MEGF9	28.6135483870968	73.7617647058824	1.36617475336753	0	0
22924	MAPRE3	11.7425806451613	30.2688235294118	1.36608310073922	0	0
1831	TSC22D3	8.02645161290323	20.6813725490196	1.36549769778234	0	0
284861	FAM230B	1.61451612903226	4.16	1.36548167480461	0	0
23230	VPS13A	14.9577419354839	38.5186274509804	1.36466389779582	0	0
10585	POMT1	13.1187096774194	33.771568627451	1.36418336428533	0	0
441631	TSPAN11	7.1358064516129	18.3641176470588	1.36374118971557	0	0
26270	FBXO6	1.38129032258064	3.5543137254902	1.36355444785997	0	0
3703	STT3A	11.1090322580645	28.5654901960784	1.36254014279803	0	0
80014	WWC2	7.98032258064516	20.5190196078431	1.36244283172052	0	0
8165	AKAP1	29.4851612903226	75.76	1.36144724476544	0	0
2539	G6PD	5.92451612903226	15.221568627451	1.36134780527391	0	0
3653	IPW	19.3151612903226	49.6050980392157	1.36075467281127	0	0
55108	BSDC1	31.2096774193548	80.1401960784314	1.3605325938469	1	0
7844	RNF103	12.3361290322581	31.668431372549	1.36015564774079	0	0
28511	NKIRAS2	39.3490322580645	100.936274509804	1.35904468388609	0	0
2566	GABRG2	1.27967741935484	3.28039215686274	1.35808811119581	0	0
90139	TSPAN18	34.2038709677419	87.6633333333333	1.35781392828866	0	0
5770	PTPN1	14.0741935483871	36.0535294117647	1.35708823885484	0	0
54821	ERCC6L	2.09096774193548	5.35509803921569	1.35674218240483	0	0
257415	FAM133B	2.8341935483871	7.25705882352941	1.35644668020597	0	0
2039	DMTN	3.63096774193548	9.29607843137255	1.35626812779261	0	0
25777	SUN2	25.9812903225806	66.5082352941177	1.35605990958377	0	0
9077	DIRAS3	11.8883870967742	30.4288235294118	1.3558855587397	0	0
347252	IGFBPL1	118.612580645161	303.317254901961	1.35457053386221	0	0
201595	STT3B	29.0290322580645	74.223137254902	1.35437250440218	0	0
10318	TNIP1	14.1229032258065	36.1003921568627	1.35397781719285	0	0
23063	WAPAL	34.148064516129	87.2854901960784	1.3539380389425	0	0
116092	DNTTIP1	6.47064516129032	16.5286274509804	1.35298545751552	0	0
5198	PFAS	12.3387096774194	31.5021568627451	1.35225907689913	0	0
11189	CELF3	3.6658064516129	9.35470588235294	1.35156167894092	0	0
9859	CEP170	59.7693548387097	152.355294117647	1.34996175713384	0	0
92126	DSEL	3.83451612903226	9.76529411764706	1.34861895880068	0	0
11079	RER1	11.1412903225806	28.3676470588235	1.34833016460264	0	0
54851	ANKRD49	18.8251612903226	47.9056862745098	1.34753468441731	0	0
2037	EPB41L2	22.0432258064516	56.0847058823529	1.34727204279888	0	0
9143	SYNGR3	4.6	11.7033333333333	1.34721372921522	0	0
163255	ZNF540	2.30483870967742	5.86254901960784	1.34686228492788	0	0
81558	FAM117A	1.95935483870968	4.98294117647059	1.34661885012755	0	0
84445	LZTS2	2.63064516129032	6.68960784313725	1.34650497852568	0	0
23411	SIRT1	16.9287096774194	43.0488235294118	1.3465017972905	0	0
4205	MEF2A	19.5316129032258	49.666862745098	1.34647252982298	0	0
63922	CHTF18	7.30483870967742	18.5635294117647	1.34554670666163	0	0
51517	NCKIPSD	4.64064516129032	11.7907843137255	1.34526239473438	0	0
50804	MYEF2	51.8590322580645	131.732156862745	1.34494037246248	0	0
5063	PAK3	34.4661290322581	87.5241176470588	1.34450133704137	0	0
101926935	LOC101926935	15.4187096774194	39.1274509803922	1.34349908901802	0	0
130074	FAM168B	41.84	106.141764705882	1.34303768351534	1	0
10128	LRPPRC	32.8883870967742	83.4323529411765	1.34302867489792	0	0
1912	PHC2	60.561935483871	153.608823529412	1.3427778711773	0	0
157638	FAM84B	5.14064516129032	13.0339215686275	1.34224988168427	0	0
5297	PI4KA	12.6493548387097	32.0703921568627	1.34217819085869	0	0
10213	PSMD14	115.001612903226	291.241764705882	1.34056316081558	0	0
29803	REPIN1	30.9203225806452	78.2358823529412	1.33927507107956	1	0
116442	RAB39B	6.27967741935484	15.8856862745098	1.3389650606363	0	0
51611	DPH5	16.5303225806452	41.8139215686274	1.33886847625854	0	0
8464	SUPT3H	7.08322580645161	17.9078431372549	1.33811314633437	0	0
51548	SIRT6	25.85	65.3445098039216	1.3379017464309	0	0
57606	SLAIN2	16.9651612903226	42.8390196078431	1.33635031764488	0	0
54819	ZCCHC10	39.9145161290323	100.659215686275	1.33449383487206	0	0
9147	NEMF	74.3025806451613	187.340784313725	1.33418078640812	0	0
79177	ZNF576	5.16709677419355	12.9996078431373	1.3310422931221	0	0
79650	USB1	17.9438709677419	45.1286274509804	1.3305517495443	0	0
1209	CLPTM1	5.39903225806452	13.5772549019608	1.33041907809369	0	0
7532	YWHAG	86.6196774193548	217.816470588235	1.33034634540432	0	1
9321	TRIP11	20.6825806451613	51.9864705882353	1.32972000508738	2	0
5073	PARN	12.4683870967742	31.3392156862745	1.32969422346891	0	0
10842	PPP1R17	72.6696774193548	182.621568627451	1.32943175840194	0	0
154091	SLC2A12	5.22032258064516	13.1188235294118	1.32942748420754	0	0
8971	H1FX	112.565483870968	282.865490196078	1.32935165817503	0	0
6827	SUPT4H1	35.4622580645161	89.0927450980392	1.32902355360086	0	0
8507	ENC1	90.3990322580645	226.98137254902	1.32819467271626	0	0
23413	NCS1	27.0816129032258	67.9603921568628	1.32738051318342	0	0
113878	DTX2	4.93806451612903	12.3911764705882	1.32729557891765	0	0
9545	RAB3D	10.3603225806452	25.9964705882353	1.32724684529923	0	0
80263	TRIM45	5.09645161290323	12.7862745098039	1.32703094245028	0	0
25921	ZDHHC5	3.67774193548387	9.22647058823529	1.32695862728168	0	1
8743	TNFSF10	1	2.50843137254902	1.3267854683643	0	0
9529	BAG5	25.6138709677419	64.2123529411765	1.32592556379558	0	1
221981	THSD7A	74.1677419354839	185.913529411765	1.32576801134512	1	0
57476	GRAMD1B	8.97612903225806	22.4962745098039	1.32552078403909	0	0
23077	MYCBP2	41.7445161290323	104.50862745098	1.32396345337271	0	0
81573	ANKRD13C	11.0451612903226	27.6345098039216	1.32305653522428	0	0
65084	TMEM135	15.521935483871	38.8345098039216	1.3230307919972	0	0
351	APP	11.048064516129	27.6370588235294	1.32281044069016	0	0
58986	TMEM8A	10.7096774193548	26.7696078431373	1.32168097854272	0	0
1647	GADD45A	16.4503225806452	41.093137254902	1.32078160264505	0	0
126382	NR2C2AP	5.81096774193548	14.51	1.3201971683509	0	0
5789	PTPRD	25.0374193548387	62.4511764705882	1.3186428807866	0	0
127933	UHMK1	5.74161290322581	14.3113725490196	1.31763406893279	0	0
221079	ARL5B	2.80387096774194	6.98823529411765	1.31750822564338	0	0
64753	CCDC136	13.5890322580645	33.8511764705882	1.31676325604291	0	0
2936	GSR	4.47258064516129	11.1407843137255	1.31667140143126	0	0
64778	FNDC3B	2.84935483870968	7.09294117647059	1.31574868701969	0	0
9122	SLC16A4	6.78806451612903	16.8917647058824	1.31524787441279	0	0
53616	ADAM22	7.40709677419355	18.4235294117647	1.31456937492529	0	0
79862	ZNF669	4.54516129032258	11.3005882352941	1.31399447578923	0	0
55830	GLT8D1	16.3238709677419	40.5833333333333	1.3139041545225	0	0
1946	EFNA5	12.8351612903226	31.9052941176471	1.31369440815877	0	0
165	AEBP1	6.39161290322581	15.8801960784314	1.31297678431888	0	0
6711	SPTBN1	37.0138709677419	91.9270588235294	1.31242355998089	1	0
23179	RGL1	14.9729032258065	37.1862745098039	1.31241623428634	0	0
345462	ZNF879	1.92129032258065	4.77137254901961	1.31232879800432	0	0
23013	SPEN	45.0977419354839	111.963725490196	1.31190429317268	2	0
6861	SYT5	3.93322580645161	9.76333333333333	1.31166077361816	0	0
131566	DCBLD2	13.5222580645161	33.5633333333333	1.31154991822905	0	0
85478	CCDC65	2.94064516129032	7.29529411764706	1.31083343401784	0	0
60412	EXOC4	19.1496774193548	47.4986274509804	1.31056573522806	0	0
80856	KIAA1715	15.1690322580645	37.6229411764706	1.31048358746892	0	0
27065	NSG1	56.0551612903226	139.01431372549	1.31031431820566	0	0
79603	CERS4	7.33741935483871	18.1927450980392	1.31001860040855	0	0
157869	SBSPON	5.59677419354839	13.8747058823529	1.30978974206371	0	0
202052	DNAJC18	21.2741935483871	52.7352941176471	1.30966439275337	0	0
85007	PHYKPL	5.28225806451613	13.0898039215686	1.30921679547564	0	0
79053	ALG8	23.8003225806452	58.9488235294118	1.30848189350652	0	0
3727	JUND	33.6893548387097	83.4276470588235	1.30823275643122	0	0
4430	MYO1B	26.4658064516129	65.5370588235294	1.30818131331112	0	0
84547	PGBD1	12.9190322580645	31.9874509803922	1.30800802705196	0	0
1114	CHGB	16.8958064516129	41.7613725490196	1.30550391574377	0	0
54665	RSBN1	76.1458064516129	188.139215686275	1.3049641041327	0	0
25855	BRMS1	36.9338709677419	91.251568627451	1.3049048826752	0	0
81929	SEH1L	21.7264516129032	53.6429411764706	1.30393576932967	0	0
56265	CPXM1	10.8690322580645	26.83	1.30362356121057	0	0
23400	ATP13A2	14.0516129032258	34.6556862745098	1.30235634936225	0	0
133746	JMY	10.8103225806452	26.6580392156863	1.30216109566269	0	0
26153	KIF26A	4.98612903225806	12.288431372549	1.30130864352548	0	0
100506834	LOC100506834	1.53612903225806	3.7856862745098	1.30125545258829	0	0
29916	SNX11	5.52548387096774	13.6052941176471	1.29999543184829	0	0
9731	CEP104	2.71290322580645	6.67980392156863	1.29996816958483	0	0
4137	MAPT	68.0838709677419	167.497254901961	1.29875248140913	0	1
7366	UGT2B15	1.46161290322581	3.59490196078431	1.29839115105161	0	0
125228	FAM210A	3.93806451612903	9.68372549019608	1.29807543638696	0	0
2530	FUT8	19.6254838709677	48.2450980392157	1.29765413983951	0	0
[truncated: 9,021 more rows]
