# Supplementary material for: Coexpression enrichment analysis at the single-cell level reveals convergent defects in neural progenitor cells and their cell-type transitions in neurodevelopmental disorders
Source: HighWire-hosted journal article supplement (doi:10.1101/gr.254987.119), 2020-06-01
Supplement: Supplemental_Table_S3.xlsx [file Supplemental_Table_S3.xlsx]

## Sheet: Supplemental Table S3
Supplemental Table S3. Expression change of ASD genes with dnLoF mutations and epilepsy genes with dnMis mutations during the differentiation.
(A) Expression change of ASD genes with dnLoF mutations and epilepsy genes with dnMis mutations during the differentiation from NPCs to excitatory neurons at GW10.
(B) Expression change of ASD genes with dnLoF mutations and epilepsy genes with dnMis mutations during the differentiation from NPCs to excitatory neurons at GW16.

## Sheet: Supplemental Table S3A
Supplemental Table S3A. Expression change of ASD genes with dnLoF mutations and epilepsy genes with dnMis mutations during the differentiation from NPCs to excitatory neurons at GW10.
Column "dnLoF-ASD": 3+=at least three dnLoF mutations, 2=two dnLoF mutations, 1=only one dnLoF mutation, and 0=no dnLoF mutation.
Column "dnMis-Epi": 2+=at least two dnMis mutations, 1=only one dnMis mutation, and 0=no dnMis mutation.
Gene ID	Symbol	Average expression (NPCs)	Average expression (Ex)	log2(fold change, Ex/NPCs)	dnLoF-ASD	dnMis-Epi
1381	CRABP1	12.7254761904762	262.276129032258	4.36529495877656	0	0
814	CAMK4	1.23988095238095	21.1435483870968	4.09194400387482	0	1
101927468	LOC101927468	1.4177380952381	22.5623655913978	3.99225539045741	0	0
54674	LRRN3	2.78559523809524	43.7439784946237	3.97302689183468	0	0
140731	ANKRD60	1.81285714285714	24.4133333333333	3.75133214329268	1	0
388722	C1orf53	1.71130952380952	18.270752688172	3.41636344078201	0	0
3763	KCNJ6	1.74630952380952	18.2352688172043	3.38435027092943	0	0
54627	MAP10	1.52107142857143	15.7756989247312	3.37454411578648	0	0
401145	CCSER1	4.83011904761905	47.4082795698925	3.29500838648956	1	0
100996635	LOC100996635	8.82130952380952	81.4049462365591	3.20605171164229	0	0
57654	UVSSA	1.4802380952381	13.3845161290323	3.17666382816684	0	0
4747	NEFL	1.00892857142857	8.74860215053763	3.1162284815485	0	0
100628315	DNM3OS	1.98071428571429	16.8489247311828	3.08856382975861	0	0
150	ADRA2A	2.30404761904762	19.5617204301075	3.08579081999703	0	0
54868	TMEM104	1.61797619047619	13.5402150537634	3.06498836995332	0	0
1141	CHRNB2	3.0302380952381	24.8410752688172	3.03522456298937	0	0
55799	CACNA2D3	1.3597619047619	10.9260215053763	3.00634220595132	2	0
79644	SRD5A3	2.00833333333333	15.7108602150538	2.96769152878833	0	0
342977	NANOS3	2.2025	17.1049462365591	2.95719964524524	0	0
2566	GABRG2	2.4877380952381	18.811935483871	2.91874177541046	0	0
64840	PORCN	1.73583333333333	12.9209677419355	2.89601378897551	0	0
51655	RASD1	10.3836904761905	76.5878494623656	2.88279624478746	0	0
133022	TRAM1L1	4.51357142857143	33.262688172043	2.8815634230626	0	0
6620	SNCB	12.4127380952381	91.0406451612903	2.87468939025787	0	0
2042	EPHA3	1.4097619047619	10.3024731182796	2.86946726829057	0	0
5798	PTPRN	2.31178571428571	16.8281720430108	2.86379889088819	0	0
140767	NRSN1	4.79916666666667	34.9070967741935	2.86266455151459	0	0
91801	ALKBH8	1.43095238095238	10.3494623655914	2.85450825631653	0	0
57624	NYAP2	8.03428571428571	57.0852688172043	2.82887682548907	0	0
54622	ARL15	1.58321428571429	10.9770967741935	2.79356809993501	0	0
131096	KCNH8	8.31214285714286	57.3350537634409	2.78612509558533	0	0
161253	REM2	9.78440476190476	67.355376344086	2.78323711529819	0	0
90025	UBE3D	1.51142857142857	10.3594623655914	2.77696442672069	0	0
9456	HOMER1	3.07535714285714	21.0425806451613	2.77448578020525	0	0
5924	RASGRF2	2.26107142857143	15.350752688172	2.76323092299532	0	0
55223	TRIM62	2.10583333333333	14.1540860215054	2.74875542886025	0	0
441094	NR2F1-AS1	10.0048809523809	66.9949462365591	2.74334826919791	0	0
54873	PALMD	10.1107142857143	65.3878494623656	2.693137653268	0	0
2898	GRIK2	4.91440476190476	31.2663440860215	2.66952194609092	0	0
2629	GBA	1.52559523809524	9.64440860215054	2.66032052889532	0	0
138046	RALYL	7.4947619047619	47.1283870967742	2.65264175581368	0	0
728215	FAM155A	5.47071428571429	34.342688172043	2.65020185422698	0	0
139324	HDX	5.88428571428571	36.7164516129032	2.64148743499997	0	0
123879	DCUN1D3	2.74583333333333	17.1318279569892	2.64136312992114	0	0
101928590	LOC101928590	1.12178571428571	6.93860215053763	2.62884793118957	0	0
8707	B3GALT2	4.03630952380952	24.4466666666667	2.59852904866972	0	0
26033	ATRNL1	2.73845238095238	16.2332258064516	2.56751701676354	0	0
339451	KLHL17	1.96738095238095	11.4921505376344	2.54630055122982	0	0
9796	PHYHIP	14.4960714285714	84.5386021505376	2.54394828822825	0	0
55144	LRRC8D	2.87928571428571	16.7561290322581	2.54090603784683	0	0
400954	EML6	7.25059523809524	40.8110752688172	2.49278937922263	0	0
2674	GFRA1	3.03488095238095	16.9488172043011	2.4814727655943	0	0
252995	FNDC5	10.3003571428571	57.3817204301075	2.47789686328237	0	0
25950	RWDD3	7.30357142857143	40.0348387096774	2.45458197795954	0	0
23037	PDZD2	1.07130952380952	5.83215053763441	2.44465259334012	0	0
4741	NEFM	23.6511904761905	128.380752688172	2.44044421639265	0	0
169270	ZNF596	1.21083333333333	6.52677419354839	2.43036983018656	0	0
100132356	LOC100132356	2.9025	15.610752688172	2.42717212778459	0	0
5800	PTPRO	24.1471428571429	128.94376344086	2.41681759526486	0	1
6752	SSTR2	36.2033333333333	192.795483870968	2.41287681646692	0	0
25906	ANAPC15	2.77892857142857	14.722688172043	2.40544045524424	0	0
1137	CHRNA4	6.25464285714286	33.1088172043011	2.40421605877261	0	0
375323	LHFPL4	4.71380952380952	24.9041935483871	2.4014233259021	0	0
22999	RIMS1	4.69357142857143	24.741935483871	2.39820034216215	2	0
54438	GFOD1	5.28440476190476	27.6895698924731	2.38952976425945	0	0
124751	KRBA2	7.94607142857143	41.5855913978495	2.38777008182306	0	0
57554	LRRC7	8.19011904761905	42.8577419354839	2.38759951266444	0	0
10590	SCGN	1.06583333333333	5.54236559139785	2.37852002015292	0	0
726	CAPN5	2.71047619047619	14.0652688172043	2.37551888680135	0	0
65997	RASL11B	22.9169047619048	118.306666666667	2.36804726600498	0	0
113	ADCY7	3.77416666666667	19.3844086021505	2.36066668199046	0	0
8916	HERC3	6.78559523809524	34.8377419354839	2.3601038356331	0	0
83667	SESN2	4.73119047619048	24.2613978494624	2.35838752588911	0	0
92283	ZNF461	1.89571428571429	9.70182795698925	2.35551505283684	0	0
6505	SLC1A1	1.57226190476191	8.01387096774193	2.34965772161187	0	0
54020	SLC37A1	3.71547619047619	18.9332258064516	2.34930120621317	0	0
56934	CA10	9.36166666666667	47.3452688172043	2.3383829630973	0	0
2051	EPHB6	28.9415476190476	146.120215053763	2.33594180645742	0	0
4693	NDP	1.78916666666667	8.95741935483871	2.32379536430415	0	0
100506696	PCAT6	5.40130952380952	27.0274193548387	2.32304263645832	0	0
283140	LOC283140	2.05083333333333	10.2250537634409	2.31782627181784	0	0
673	BRAF	2.58666666666667	12.8387096774194	2.31133415846553	0	1
118813	ZFYVE27	13.5546428571429	67.2509677419355	2.31076792720945	0	0
9853	RUSC2	5.96440476190476	29.465376344086	2.30457062146056	0	0
10397	NDRG1	4.15166666666667	20.4396774193548	2.29960990686757	0	0
10716	TBR1	16.5965476190476	80.8781720430107	2.28486722451623	0	0
126068	ZNF441	2.405	11.6387096774194	2.27482232398583	0	0
23285	KIAA1107	4.4377380952381	21.3396774193548	2.26564193714203	0	0
4485	MST1	1.39630952380952	6.7052688172043	2.26367638835909	0	0
113802	HENMT1	9.45630952380952	44.8740860215054	2.24653339128768	0	0
407738	FAM19A1	1.08821428571429	5.15075268817204	2.24282059830522	0	0
9957	HS3ST1	1.16904761904762	5.52698924731183	2.24116010916115	0	0
4645	MYO5B	9.27976190476191	43.7581720430108	2.23739277711239	0	0
5137	PDE1C	2.84738095238095	13.4221505376344	2.23690841310381	0	0
5550	PREP	14.7845238095238	69.3296774193548	2.22938527104073	0	0
64409	WBSCR17	5.76059523809524	26.9752688172043	2.22734753959709	0	0
794	CALB2	92.2770238095238	432.046129032258	2.22714197642304	0	0
1159	CKMT1B	1.31392857142857	6.13817204301075	2.22392223363345	0	0
9294	S1PR2	1.86952380952381	8.70967741935484	2.21994844175127	0	0
774	CACNA1B	6.67857142857143	31.014623655914	2.21533717582349	0	0
79605	PGBD5	4.54440476190476	21.0682795698925	2.21290926495821	0	0
5100	PCDH8	4.38988095238095	20.35	2.21277507302108	0	0
56479	KCNQ5	1	4.62602150537634	2.20977197276781	0	0
26063	DECR2	6.47297619047619	29.8778494623656	2.20657520771745	0	1
29071	C1GALT1C1	7.64761904761905	35.0897849462366	2.19796854099943	0	0
6863	TAC1	4.34904761904762	19.8988172043011	2.19391126829019	0	0
58476	TP53INP2	7.28011904761905	33.1466666666667	2.18682984837365	0	0
4808	NHLH2	30.1566666666667	137.204623655914	2.18578022382848	0	0
84792	FAM220A	4.62642857142857	20.9808602150538	2.18110300758572	0	0
285753	CEP57L1	8.1552380952381	36.8144086021505	2.17447162311697	0	0
5099	PCDH7	4.14857142857143	18.7017204301075	2.17248446299807	0	0
57185	NIPAL3	4.53892857142857	20.407311827957	2.16866246449704	0	0
8398	PLA2G6	4.18095238095238	18.6604301075269	2.1580787225221	0	0
387923	SERP2	6.08535714285714	27.1586021505376	2.15799538547395	0	0
81855	SFXN3	13.1292857142857	58.5810752688172	2.1576462444736	0	0
6252	RTN1	369.412738095238	1646.52344086022	2.15611753179925	0	1
114299	PALM2	1.15119047619048	5.11311827956989	2.15107683784512	0	0
3208	HPCA	11.0104761904762	48.3138709677419	2.13356058277251	0	0
63891	RNF123	5.54630952380952	24.2860215053763	2.13052613303237	0	0
9495	AKAP5	3.04511904761905	13.3218279569892	2.12922151975953	0	0
8322	FZD4	2.05678571428571	8.95075268817204	2.12161751196385	0	0
478	ATP1A3	26.285	113.882795698925	2.11523817520119	0	1
51299	NRN1	67.5927380952381	292.538064516129	2.11368419542236	0	0
54768	HYDIN	5.53928571428571	23.9720430107527	2.11358100830979	0	0
348	APOE	1.33857142857143	5.7889247311828	2.11260127263745	0	0
116	ADCYAP1	5.61785714285714	24.2123655913978	2.10765219652397	0	0
83723	FAM57B	2.4197619047619	10.4002150537634	2.10367635649296	0	0
51257	MARCH2	1.85041666666667	7.93688172043011	2.10072214037353	0	0
3760	KCNJ3	1.72380952380952	7.39	2.09997399495434	0	0
57578	UNC79	12.0472619047619	51.6315053763441	2.09954637340277	1	0
78986	DUSP26	22.4835714285714	96.2650537634409	2.09814094420173	0	0
728609	SDHAP3	4.71261904761905	20.0894623655914	2.09183798663591	0	0
1645	AKR1C1	18.9703571428571	80.654623655914	2.08801040085557	0	0
1113	CHGA	33.8010714285714	143.698279569892	2.08790190622101	0	0
729678	LINC00847	3.01154761904762	12.7851612903226	2.08589338458774	0	0
79148	MMP28	2.98821428571429	12.6381720430108	2.08043229738458	0	0
1183	CLCN4	14.9204761904762	62.9988172043011	2.07803116215339	0	1
11189	CELF3	7.05630952380952	29.7752688172043	2.07712878212637	0	0
23157	SEPT6	20.9908333333333	88.3160215053763	2.07291573991923	0	0
7773	ZNF230	1.03047619047619	4.3305376344086	2.07123497477457	0	0
10069	RWDD2B	6.08785714285714	25.5459139784946	2.06908614303156	0	0
64089	SNX16	3.5972619047619	15.0823655913978	2.06789161937155	0	0
100419583	LOC100419583	4.6977380952381	19.6629032258065	2.06543816253682	0	0
1646	AKR1C2	12.9647619047619	54.1224731182796	2.0616320529229	0	0
386597	RNF144A-AS1	3.83095238095238	15.847311827957	2.04846313926812	0	0
83541	FAM110A	22.2164285714286	91.6696774193548	2.04481768353246	0	0
4753	NELL2	84.7925	348.614301075269	2.03962318641243	0	0
56133	PCDHB2	2.87928571428571	11.8277419354839	2.03839181022786	0	0
11112	HIBADH	3.56357142857143	14.5011827956989	2.02477483184079	1	0
10802	SEC24A	7.82	31.7647311827957	2.0221852973674	0	0
124925	SEZ6	53.0333333333333	214.221935483871	2.01413487900368	0	0
84705	GTPBP3	7.59047619047619	30.6461290322581	2.01344255457852	0	0
148014	TTC9B	22.6683333333333	90.9093548387097	2.00375043734112	0	0
80128	TRIM46	7.71380952380952	30.8627956989247	2.00035332679102	0	0
23762	OSBP2	2.80797619047619	11.1834408602151	1.99376152919911	0	0
9956	HS3ST2	1.85392857142857	7.3689247311828	1.99086845697442	0	0
92691	TMEM169	12.9395238095238	51.4090322580645	1.99023732919259	0	0
7857	SCG2	8.9997619047619	35.7438709677419	1.98973714342532	0	0
9644	SH3PXD2A	11.3313095238095	44.9988172043011	1.98957248212171	0	0
868	CBLB	17.8661904761905	70.9129032258064	1.98881611430037	0	0
4157	MC1R	3.7997619047619	14.990752688172	1.98009189665031	0	0
79971	WLS	8.02488095238095	31.6435483870968	1.97935949182046	0	0
23768	FLRT2	13.2544047619048	52.2489247311828	1.97892946512286	0	0
79012	CAMKV	54.8730952380952	215.92623655914	1.97636769000892	0	0
4856	NOV	6.10130952380952	24.0017204301075	1.97594699452735	0	0
57406	ABHD6	17.4959523809524	68.7156989247312	1.97361853877238	0	0
388561	ZNF761	4.77107142857143	18.7350537634409	1.97335492728875	0	0
2784	GNB3	1.51702380952381	5.95516129032258	1.97289685404439	0	0
51062	ATL1	35.1441666666667	137.803440860215	1.97125476016018	0	0
50486	G0S2	1.22761904761905	4.80838709677419	1.96969010835168	0	0
285987	DLX6-AS1	1.19666666666667	4.68311827956989	1.96844813271835	0	0
27065	NSG1	108.549047619048	424.536451612903	1.96754136381638	0	0
51735	RAPGEF6	4.74880952380952	18.5496774193548	1.9657563029273	0	0
150094	SIK1	2.66130952380952	10.348064516129	1.95915273581267	0	0
534	ATP6V1G2	31.8678571428571	123.908494623656	1.95910117787267	0	0
7325	UBE2E2	5.83011904761905	22.6652688172043	1.95888602431389	0	0
22924	MAPRE3	23.3058333333333	90.4325806451613	1.95615153458175	0	0
494513	DFNB59	2.35190476190476	9.12537634408602	1.95605441817017	0	0
3097	HIVEP2	1.0222619047619	3.96258064516129	1.9546754329317	0	0
56129	PCDHB7	1.52380952380952	5.89795698924731	1.95253272438732	0	0
100507173	LINC01012	1.80630952380952	6.97698924731183	1.94955948029436	0	0
285704	RGMB	19.7930952380952	76.4154838709677	1.94886775919937	0	0
3815	KIT	13.8967857142857	53.3020430107527	1.93943960060573	0	0
27239	GPR162	12.530119047619	47.9132258064516	1.9350238259944	0	0
79739	TTLL7	12.3546428571429	47.1578494623656	1.93244462220648	0	0
9308	CD83	6.44559523809524	24.5727956989247	1.93067650559036	0	0
678655	CD27-AS1	3.2352380952381	12.3296774193548	1.9301912596483	0	0
83694	RPS6KL1	27.2269047619048	103.651935483871	1.92864216920576	0	0
57643	ZSWIM5	9.43154761904762	35.8303225806452	1.92561460548457	0	0
196385	DNAH10	1.60297619047619	6.08537634408602	1.92459349091153	0	0
10842	PPP1R17	136.962261904762	519.685376344086	1.9238600300725	0	0
158696	LINC00889	2.685	10.1813978494624	1.92294165571721	0	0
26575	RGS17	11.9586904761905	45.2959139784946	1.92132149715194	0	0
2745	GLRX	63.2922619047619	239.592580645161	1.92048220150234	0	0
7071	KLF10	8.47178571428571	32.0013978494624	1.91739692137532	0	0
3801	KIFC3	2.01011904761905	7.59290322580645	1.9173706742953	0	0
5138	PDE2A	12.1357142857143	45.7054838709677	1.91310824887688	0	0
114798	SLITRK1	15.6302380952381	58.7748387096774	1.91085891976791	0	0
79178	THTPA	24.7997619047619	93.2394623655914	1.9106144158819	0	0
222537	HS3ST5	1.64214285714286	6.16741935483871	1.90908730708585	0	0
729683	LOC729683	4.67547619047619	17.559247311828	1.90904579017323	0	0
171392	ZNF675	3.00738095238095	11.2939784946237	1.90897425498536	0	0
9855	FARP2	2.18952380952381	8.20806451612903	1.90642493253827	0	0
3915	LAMC1	9.65095238095238	36.1748387096774	1.90624336092587	0	0
6447	SCG5	68.2259523809524	255.364086021505	1.90416310743887	0	0
6653	SORL1	8.75380952380952	32.7270967741935	1.90250272886718	0	0
23040	MYT1L	69.6208333333333	259.530430107527	1.89831271765319	2	0
151525	WDSUB1	7.14511904761905	26.6110752688172	1.89699685231121	0	0
64748	LPPR2	22.2622619047619	82.8574193548387	1.89603070563121	0	0
79837	PIP4K2C	3.37595238095238	12.560752688172	1.89555645904698	0	0
5164	PDK2	12.0669047619048	44.8184946236559	1.89303852895129	0	0
51604	PIGT	18.099880952381	67.1918279569892	1.89230557103062	0	0
84795	PYROXD2	4.1577380952381	15.4035483870968	1.88939194309788	0	0
100128590	SLC8A1-AS1	2.28392857142857	8.45935483870968	1.88903010700119	0	0
91584	PLXNA4	12.4414285714286	45.944623655914	1.88474389959666	0	0
11075	STMN2	867.079047619048	3193.14268817204	1.88074159390316	0	0
79608	RIC3	5.55666666666667	20.3867741935484	1.87534191166591	0	0
57154	SMURF1	3.71928571428571	13.6445161290323	1.87522374903104	1	1
57084	SLC17A6	11.8985714285714	43.5829032258065	1.87297393269866	0	0
642597	C18orf42	4.76369047619048	17.4365591397849	1.87196379124934	0	0
6242	RTKN	1.45297619047619	5.31827956989247	1.87194855627951	0	0
84959	UBASH3B	3.22488095238095	11.7932258064516	1.87064058429802	0	0
163059	ZNF433	5.43880952380952	19.8440860215054	1.86734631003877	0	0
4884	NPTX1	28.1594047619048	102.720752688172	1.86703893549873	0	0
25927	CNRIP1	14.9114285714286	54.2268817204301	1.86258973165057	0	0
6861	SYT5	7.40309523809524	26.8939784946237	1.86108269898596	0	0
91300	R3HDM4	4.39797619047619	15.9597849462366	1.85952951282488	0	0
317	APAF1	9.4502380952381	34.2759139784946	1.85877255338429	0	0
56242	ZNF253	12.6313095238095	45.799247311828	1.85831967335131	0	0
54329	GPR85	14.4366666666667	52.2496774193548	1.85568445858223	0	0
23245	ASTN2	8.88226190476191	32.045376344086	1.85111719637182	0	0
130872	AHSA2	4.195	15.0924731182796	1.84708651574168	0	0
84984	CEP19	11.9275	42.9083870967742	1.84696798565155	0	0
8569	MKNK1	3.69833333333333	13.2508602150538	1.84113885231181	0	0
143879	KBTBD3	7.97380952380952	28.5305376344086	1.83916588541859	0	0
404201	WDFY3-AS2	10.3089285714286	36.7494623655914	1.83382874570093	0	0
101928307	LOC101928307	11.7303571428571	41.7632258064516	1.83198621211303	0	0
9378	NRXN1	146.497380952381	521.137741935484	1.83078986898771	0	0
54899	PXK	12.7005952380952	45.1583870967742	1.83009784560499	0	0
9892	SNAP91	23.0671428571429	82.0125806451613	1.83000591466775	0	0
154796	AMOT	6.25261904761905	22.2029032258065	1.82821580786047	0	0
254122	SNX32	10.0689285714286	35.7209677419355	1.82686099084847	0	0
84964	ALKBH6	8.66142857142857	30.6843010752688	1.82482382186797	0	0
145773	FAM81A	3.96380952380952	14.0232258064516	1.82285871287853	0	0
148189	LINC00662	5.95761904761905	21.0584946236559	1.82159452797152	0	0
5334	PLCL1	3.64940476190476	12.8913978494624	1.8206756307881	0	0
25769	SLC24A2	7.62321428571429	26.8754838709677	1.81781939405744	0	0
8715	NOL4	35.9152380952381	126.476344086022	1.81619958617819	0	0
55102	ATG2B	8.93678571428571	31.4297849462366	1.81430446375761	0	0
114803	MYSM1	12.1897619047619	42.7691397849462	1.8109002436581	0	0
400451	FAM174B	2.43940476190476	8.50591397849462	1.80193710551835	0	0
5864	RAB3A	44.5855952380952	155.298172043011	1.80039126532184	0	0
222865	TMEM130	10.9730952380952	38.1551612903226	1.79790769354641	0	0
26207	PITPNC1	7.3125	25.3145161290323	1.79152828361184	0	0
129285	PPP1R21	12.737380952381	44.05	1.79007335657891	0	0
117	ADCYAP1R1	14.4608333333333	49.9977419354839	1.78971224668543	0	0
10486	CAP2	39.8454761904762	137.654838709677	1.78856747911257	0	1
643529	LINC00865	8.05154761904762	27.8037634408602	1.78794215441731	0	0
219287	AMER2	61.6961904761905	213.049569892473	1.78793582311716	0	0
4760	NEUROD1	206.194047619048	711.767956989247	1.78740429997696	0	0
2596	GAP43	398.11619047619	1373.78784946237	1.78689778081096	0	0
3398	ID2	224.995119047619	776.369784946237	1.78685026724756	0	0
6857	SYT1	316.743214285714	1092.14451612903	1.78577815362126	0	0
140290	TCP10L	21.3121428571429	73.3361290322581	1.78284845890771	0	0
51412	ACTL6B	27.3659523809524	93.4340860215054	1.77156689505336	0	0
5873	RAB27A	5.7627380952381	19.6666666666667	1.77092609499058	0	0
81544	GDPD5	7.73547619047619	26.389247311828	1.77038819112126	0	0
2899	GRIK3	16.1911904761905	55.1497849462366	1.76814619473392	0	0
2583	B4GALNT1	8.87666666666667	30.1932258064516	1.7661349729909	1	0
5210	PFKFB4	2.79928571428571	9.51	1.76438659531596	0	0
1630	DCC	55.0759523809524	187.103978494624	1.76434579318582	0	0
51265	CDKL3	7.97761904761905	27.0539784946237	1.76181063131865	0	0
1534	CYB561	2.84345238095238	9.63903225806452	1.76124466586849	0	0
10653	SPINT2	38.2766666666667	129.454516129032	1.75790819279947	0	0
5519	PPP2R1B	7.07619047619048	23.9275268817204	1.75762650150054	0	0
29767	TMOD2	34.0355952380952	114.973225806452	1.75618168922304	0	0
79595	SAP130	6.86142857142857	23.1537634408602	1.75466582343359	0	0
283683	LOC283683	20.4096428571429	68.8111827956989	1.75339210518153	0	0
118433	RPL23AP7	10.0936904761905	33.868064516129	1.74647179033353	0	0
10044	SH2D3C	8.41464285714286	28.2168817204301	1.74558461724809	0	0
6335	SCN9A	4.47738095238095	15.0056989247312	1.74478353883395	0	0
6253	RTN2	6.56690476190476	21.9349462365591	1.73994573278049	0	0
84708	LNX1	5.19488095238095	17.3411827956989	1.73903971094425	0	0
58527	ABRACL	181.619166666667	605.998387096774	1.73839749246235	0	0
90321	ZNF766	20.0304761904762	66.81	1.73786733966966	0	0
2039	DMTN	7.00785714285714	23.3576344086022	1.73684889916825	0	0
6480	ST6GAL1	10.0428571428571	33.4487096774194	1.73578079107367	0	0
728730	LOC728730	4.54869047619048	15.1313978494624	1.73402209861296	0	0
259217	HSPA12A	2.17392857142857	7.22548387096774	1.73278966555895	0	0
403313	PPAPDC2	3.73595238095238	12.4170967741935	1.73277992681441	0	0
27253	PCDH17	28.9236904761905	95.9860215053763	1.73057267808814	0	0
10274	STAG1	10.3246428571429	34.2398924731183	1.72958629330443	0	0
23017	FAIM2	21.1088095238095	69.965376344086	1.72879593729906	0	0
123606	NIPA1	6.00666666666667	19.850752688172	1.72455720116492	0	0
10382	TUBB4A	16.5179761904762	54.569247311828	1.72405120814725	0	1
6622	SNCA	60.0594047619048	198.004731182796	1.72107282110861	0	0
56978	PRDM8	54.9142857142857	180.961075268817	1.72042599289063	0	0
51524	TMEM138	10.3760714285714	34.0317204301075	1.71361977054264	0	0
30850	CDR2L	3.53761904761905	11.5990322580645	1.71315383870376	0	0
10252	SPRY1	16.9752380952381	55.6578494623656	1.71315335622777	0	0
3798	KIF5A	11.3965476190476	37.3630107526882	1.71301386186489	0	0
51380	CSAD	14.1560714285714	46.2215053763441	1.70714330090403	0	0
8202	NCOA3	13.2202380952381	43.0079569892473	1.70185544056035	0	0
5274	SERPINI1	18.2597619047619	59.3418279569892	1.70038141441562	0	0
1410	CRYAB	2.28107142857143	7.40172043010753	1.69814902138719	0	0
84125	LRRIQ1	12.790119047619	41.4784946236559	1.69733384289208	0	0
3241	HPCAL1	18.8245238095238	61.0241935483871	1.69676795398085	0	0
64776	C11orf1	20.0278571428571	64.8640860215054	1.69541183725337	0	0
126074	SWSAP1	6.27630952380952	20.2660215053763	1.6910744885891	0	0
162963	ZNF610	6.20488095238095	20.0211827956989	1.69005177108815	0	0
3726	JUNB	4.85845238095238	15.6516129032258	1.68774260117942	0	0
85019	TMEM241	5.97404761904762	19.2240860215054	1.68613436667532	0	0
5121	PCP4	4.03214285714286	12.9568817204301	1.68409989355862	0	0
1020	CDK5	54.7694047619048	175.737311827957	1.68197842473999	0	0
91947	ARRDC4	4.88238095238095	15.6624731182796	1.68165526116624	0	0
643253	CCT6P1	3.36738095238095	10.8016129032258	1.68154790470373	0	0
23101	MCF2L2	4.47130952380952	14.3355913978495	1.68083209830399	0	0
729723	DNAJC27-AS1	1.64642857142857	5.27623655913979	1.68016932553402	0	0
2845	GPR22	3.8652380952381	12.3862365591398	1.68010871407762	0	0
57156	TMEM63C	3.50559523809524	11.2094623655914	1.67698574963121	0	0
64376	IKZF5	13.5175	43.1334408602151	1.67397845155985	0	0
399473	SPRED3	2.06690476190476	6.59322580645161	1.67351257767667	0	0
8187	ZNF239	8.7627380952381	27.8611827956989	1.66880286151606	0	0
163255	ZNF540	4.43380952380952	14.0910752688172	1.66816300718577	0	0
10133	OPTN	45.545119047619	144.555591397849	1.66625605567932	0	0
55068	ENOX1	12.8565476190476	40.7854838709677	1.6655524816344	0	0
29106	SCG3	161.456071428571	509.92623655914	1.65914687556871	0	0
545	ATR	3.44083333333333	10.8304301075269	1.65426061986011	0	0
283576	ZDHHC22	2.36940476190476	7.44720430107527	1.65217426283064	0	0
80216	ALPK1	15.4652380952381	48.4655913978495	1.64793181118796	0	0
728448	PPIEL	3.31452380952381	10.3845161290323	1.64756047329879	0	0
147949	ZNF583	7.61928571428571	23.8535483870968	1.64647623273449	0	0
50650	ARHGEF3	5.31702380952381	16.6386021505376	1.64584340234165	0	0
388552	BLOC1S3	3.68488095238095	11.5240860215054	1.64496241867282	0	0
116113	FOXP4	18.4055952380952	57.5186021505376	1.64388420769205	0	0
613	BCR	14.3638095238095	44.8674193548387	1.64322977983042	0	1
1428	CRYM	10.1075	31.4521505376344	1.63773246099604	0	0
57614	KIAA1468	7.92535714285714	24.612688172043	1.63485438159483	0	0
5521	PPP2R2B	124.737738095238	387.322043010753	1.63463560592023	0	0
152789	JAKMIP1	4.86619047619048	15.0981720430108	1.63350919342021	1	0
27319	BHLHE22	56.9703571428571	176.521290322581	1.63155884267754	0	0
221914	GPC2	19.7064285714286	60.9024731182796	1.6278344759919	0	0
162989	DEDD2	15.4139285714286	47.6296774193548	1.62762616722142	0	0
91526	ANKRD44	13.1879761904762	40.7191397849462	1.62648389649294	0	0
64377	CHST8	8.35571428571429	25.791935483871	1.62608497319453	0	0
79641	ROGDI	60.1044047619048	185.374086021505	1.62489695147121	0	0
9474	ATG5	21.0575	64.885376344086	1.62355919882231	0	0
11067	C10orf10	12.9789285714286	39.9069892473118	1.62047014814199	0	0
8602	NOP14	5.14428571428571	15.8162365591398	1.62036367686709	0	0
59348	ZNF350	5.1252380952381	15.7311827956989	1.61793621580936	0	0
10512	SEMA3C	17.7229761904762	54.3916129032258	1.617763313774	0	0
23114	NFASC	24.1754761904762	74.1921505376344	1.617722251979	0	1
7286	TUFT1	5.10761904761905	15.6737634408602	1.61762879757317	0	0
55180	LINS	8.98380952380952	27.5586021505376	1.6171034674456	0	0
863	CBFA2T3	9.02821428571429	27.6859139784946	1.61663958289862	0	0
283254	HARBI1	3.25107142857143	9.95774193548387	1.61490337354049	0	0
55957	LIN37	24.8694047619048	76.124623655914	1.61399121294994	0	0
29070	CCDC113	2.16571428571429	6.61021505376344	1.60985428214929	0	0
4885	NPTX2	9.99928571428572	30.5096774193548	1.6093699796225	0	0
23125	CAMTA2	12.3519047619048	37.6682795698925	1.60861660831062	0	0
10769	PLK2	26.9153571428571	82.0737634408602	1.60849153992412	0	0
23129	PLXND1	11.6285714285714	35.4464516129032	1.60796734045566	0	0
23406	COTL1	61.3920238095238	186.873978494624	1.60594255847503	0	0
23136	EPB41L3	53.9302380952381	163.815376344086	1.60290447197189	0	0
59353	TMEM35	29.4510714285714	89.4486021505376	1.60273881668766	0	0
11070	TMEM115	21.5114285714286	65.3168817204301	1.60235257999228	0	0
2047	EPHB1	15.3632142857143	46.6387096774194	1.60204778725946	0	0
10488	CREB3	22.0042857142857	66.6939784946237	1.59977197184523	0	0
53346	TM6SF1	5.585	16.9070967741935	1.59799976079435	0	0
9722	NOS1AP	12.1885714285714	36.7801075268817	1.5933966538634	0	0
8800	PEX11A	4.67702380952381	14.1025806451613	1.5922965086952	0	0
148281	SYT6	22.1434523809524	66.6661290322581	1.59007378954909	0	0
27345	KCNMB4	14.9003571428571	44.8249462365591	1.58895494202232	0	0
65977	PLEKHA3	8.50988095238095	25.5878494623656	1.58824804596937	0	0
887	CCKBR	1.83571428571429	5.50602150537634	1.58466871256273	0	0
23729	SHPK	4.57107142857143	13.6987096774194	1.58343573970736	0	0
6326	SCN2A	11.3141666666667	33.8525806451613	1.58113548902231	3+	2+
23467	NPTXR	16.7791666666667	50.1911827956989	1.58076287832024	0	0
4239	MFAP4	11.8511904761905	35.3647311827957	1.57727930696229	0	0
65981	CAPRIN2	17.1894047619048	51.2749462365591	1.57673448624069	0	0
23070	CMTR1	6.41178571428571	19.1109677419355	1.57560271973384	0	0
282890	ZNF311	3.26678571428571	9.72903225806452	1.57442448409585	0	0
6774	STAT3	12.1535714285714	36.0318279569892	1.56789151990479	0	0
9705	ST18	56.5436904761905	167.323548387097	1.56520254554789	0	0
57146	TMEM159	9.74059523809524	28.8133333333333	1.5646547297019	0	0
26047	CNTNAP2	231.292738095238	683.847849462366	1.56395540265333	0	0
6792	CDKL5	3.66857142857143	10.8344086021505	1.56233012544887	0	2+
121601	ANO4	1.11238095238095	3.28440860215054	1.56198267275832	0	0
823	CAPN1	18.8990476190476	55.7123655913978	1.55968404082325	0	0
5025	P2RX4	3.6277380952381	10.684623655914	1.55839388361438	0	0
222161	DKFZP586I1420	13.3775	39.388064516129	1.55794999739103	0	0
60677	CELF6	5.56702380952381	16.3872043010753	1.55759158939858	0	0
79629	OCEL1	2.41559523809524	7.10354838709677	1.55616113020235	0	0
1114	CHGB	32.1852380952381	94.4593548387097	1.55329454041042	0	0
84251	SGIP1	17.2340476190476	50.5177419354839	1.55152857906197	0	0
9348	NDST3	12.8840476190476	37.7395698924731	1.55049208303222	0	0
54869	EPS8L1	5.5975	16.3945161290323	1.55035879418413	0	0
23543	RBFOX2	210.105595238095	615.132688172043	1.54978306048499	0	0
63974	NEUROD6	1175.26988095238	3435.65376344086	1.54759256714417	0	0
93986	FOXP2	10.8535714285714	31.6964516129032	1.54615149340014	0	0
6457	SH3GL3	8.99404761904762	26.2387096774194	1.54465434780183	0	0
115207	KCTD12	23.0180952380952	67.1510752688172	1.54464204677017	0	0
83475	DOHH	4.46428571428571	13.0169892473118	1.54389453253311	0	0
25854	FAM149A	4.53559523809524	13.2021505376344	1.54140915030089	0	0
152302	CIDECP	10.2861904761905	29.940752688172	1.54140171574021	0	0
4615	MYD88	15.077619047619	43.8637634408602	1.54062097199312	0	0
388759	C1orf229	3.40988095238095	9.9194623655914	1.54054055675114	0	0
11247	NXPH4	9.4147619047619	27.387311827957	1.54051115153458	0	0
27075	TSPAN13	130.447976190476	379.420537634409	1.54032321050735	0	0
78992	YIPF2	11.5969047619048	33.707311827957	1.53932177797285	0	0
84816	RTN4IP1	7.1502380952381	20.7825806451613	1.53931162181872	0	0
79139	DERL1	15.1647619047619	44.0679569892473	1.53900716713873	0	0
9783	RIMS3	10.0179761904762	29.0540860215054	1.53614998343297	0	0
7772	ZNF229	6.58119047619048	19.0401075268817	1.53262114332426	0	0
140883	ZNF280B	9.89261904761905	28.5775268817204	1.53045664325848	0	0
6387	CXCL12	12.1430952380952	35.0436559139785	1.52901708426217	0	0
79772	MCTP1	5.27976190476191	15.19	1.52457709320505	0	0
590	BCHE	17.9495238095238	51.5725806451613	1.52265866780305	0	0
5136	PDE1A	50.9375	146.322795698925	1.52235448579844	0	0
23025	UNC13A	12.1978571428571	35.0347311827957	1.52215810188843	0	0
554235	ASPDH	7.04214285714286	20.2233333333333	1.52193441147983	0	0
100507433	ZNF571-AS1	2.56630952380952	7.36978494623656	1.52192733636479	0	0
79870	BAALC	6.30547619047619	18.0968817204301	1.52106389515306	0	0
64207	IRF2BPL	23.4421428571429	67.2255913978495	1.51990608863928	1	0
2912	GRM2	5.61702380952381	16.1038709677419	1.51952969446565	0	0
3757	KCNH2	3.40619047619048	9.7594623655914	1.51864256039796	0	0
8618	CADPS	50.0046428571429	142.890860215054	1.51477968138782	0	0
23108	RAP1GAP2	5.76857142857143	16.4725806451613	1.51378060120211	0	0
80325	ABTB1	10.5196428571429	30.03	1.51331874906477	0	0
116092	DNTTIP1	13.5208333333333	38.5845161290323	1.51283794128272	0	0
9883	POM121	20.7534523809524	59.2111827956989	1.51251832134393	0	0
79639	TMEM53	6.12738095238095	17.47	1.51153715360162	0	0
9204	ZMYM6	7.98214285714286	22.757311827957	1.51148214736395	0	0
8738	CRADD	7.68738095238095	21.9109677419355	1.51108913636963	0	0
116842	LEAP2	6.73976190476191	19.2038709677419	1.5106276161618	0	0
56034	PDGFC	28.705119047619	81.727311827957	1.50951024336216	0	0
414328	IDNK	7.37333333333333	20.9766666666667	1.50839655733735	0	0
7391	USF1	4.01309523809524	11.3734408602151	1.50288148610858	0	0
57410	SCYL1	10.2130952380952	28.942688172043	1.50277876061147	0	0
144108	SPTY2D1	8.20928571428571	23.2623655913978	1.50266921007471	0	0
4685	NCAM2	12.1546428571429	34.4340860215054	1.50232988138521	0	0
8036	SHOC2	33.9516666666667	96.1659139784946	1.50204322391319	0	0
728190	NUTM2A-AS1	3.28785714285714	9.30021505376344	1.50011646141093	0	0
283450	HECTD4	26.937619047619	76.1482795698925	1.49918910200805	3+	0
25837	RAB26	10.2152380952381	28.8625806451613	1.49847746846772	0	0
9363	RAB33A	34.7140476190476	98.0698924731183	1.4982907044123	0	0
79831	KDM8	2.765	7.75989247311828	1.48875718102796	0	0
23072	HECW1	10.5671428571429	29.6423655913978	1.4880752319318	0	0
2954	GSTZ1	3.88952380952381	10.9029032258064	1.48704690365434	0	0
54828	BCAS3	7.42535714285714	20.8077419354839	1.48658808866411	0	0
284439	SLC25A42	8.00464285714286	22.4289247311828	1.48645151698043	0	0
256987	SERINC5	17.9611904761905	50.2864516129032	1.48528677966641	0	0
221981	THSD7A	140.360833333333	392.881612903226	1.48495423210491	1	0
221491	C6orf1	26.5084523809524	74.1902150537634	1.48477647726627	0	0
57715	SEMA4G	6.36166666666667	17.7983870967742	1.48426982317306	0	0
84440	RAB11FIP4	11.2113095238095	31.3529032258065	1.48364424005211	0	0
114818	KLHL29	5.07285714285714	14.1815053763441	1.4831402454548	0	0
133308	SLC9B2	4.26690476190476	11.9218279569892	1.48234364435331	0	0
6483	ST3GAL2	12.9994047619048	36.2948387096774	1.48131884076672	0	0
152579	SCFD2	6.10857142857143	17.0509677419355	1.48094669193606	0	0
2760	GM2A	3.63678571428571	10.1435483870968	1.47982659276977	0	0
132299	OCIAD2	269.94630952381	752.429139784946	1.47888322845576	0	0
670	BPHL	41.5294047619048	115.410860215054	1.4745738896635	0	0
8470	SORBS2	71.225119047619	197.046021505376	1.46807458774135	0	0
26470	SEZ6L2	51.4075	142.18623655914	1.46773106157986	0	0
51239	ANKRD39	31.6021428571429	87.2724731182796	1.46550429365326	0	0
30819	KCNIP2	7.315	20.1686021505376	1.46318132734648	0	0
347252	IGFBPL1	219.306666666667	603.914838709677	1.46139545275702	0	0
7275	TUB	5.6972619047619	15.6855913978495	1.46109929055574	0	0
285268	ZNF621	6.94357142857143	19.0964516129032	1.45955478074556	0	0
9832	JAKMIP2	58.5610714285714	161.038064516129	1.4593878836102	0	0
100859930	HEIH	4.55107142857143	12.5043010752688	1.45814628616144	0	0
166785	MMAA	9.48357142857143	26.0323655913978	1.45680404440593	0	0
25830	SULT4A1	15.7290476190476	43.1550537634409	1.45609819974337	0	0
4675	NAP1L3	25.7719047619048	70.651935483871	1.45492991468923	0	0
646405	TPTE2P1	5.23559523809524	14.3502150537634	1.45464688494145	0	0
6281	S100A10	17.5547619047619	48.0832258064516	1.45367125771242	0	0
339229	OXLD1	11.9877380952381	32.8097849462366	1.45256666794436	0	0
4646	MYO6	130.164404761905	356.052043010753	1.45175315308313	0	0
374946	DRAXIN	17.8442857142857	48.780752688172	1.45084986596304	0	0
57626	KLHL1	2.09071428571429	5.7110752688172	1.44976648006682	0	0
92344	GORAB	5.6877380952381	15.5339784946237	1.44950043434951	0	0
80146	UXS1	13.1258333333333	35.8433333333333	1.44929579082635	0	0
5571	PRKAG1	27.8889285714286	76.1065591397849	1.44832828538597	0	0
158427	TSTD2	9.05345238095238	24.7025806451613	1.44812181649643	0	0
137994	LETM2	3.97369047619048	10.8412903225806	1.4479850696186	0	0
132321	C4orf33	2.26761904761905	6.18150537634409	1.44677992640256	0	0
100294145	LOC100294145	28.7521428571429	78.2570967741935	1.44455210720409	0	0
9764	KIAA0513	5.88904761904762	16.0205376344086	1.44381631970048	0	0
27077	B9D1	6.97880952380952	18.9831182795699	1.44366413623174	0	0
146760	RTN4RL1	5.57761904761905	15.158064516129	1.44236424572573	0	0
79834	PEAK1	2.91035714285714	7.90129032258065	1.4408920687584	0	0
400579	FLJ35934	4.15047619047619	11.2601075268817	1.43987183063103	0	0
9859	CEP170	116.384166666667	315.742903225806	1.43985550572302	0	0
53822	FXYD7	12.1857142857143	33.0456989247312	1.43927168995474	0	0
28969	BZW2	85.5321428571429	231.897204301075	1.43894683754702	0	0
66008	TRAK2	8.79559523809524	23.8334408602151	1.43813413016803	0	0
10868	USP20	7.99833333333333	21.6513978494624	1.43668885836437	0	0
55079	FEZF2	82.9804761904762	224.389784946237	1.43516315924869	0	0
54842	MFSD6	5.79166666666667	15.6278494623656	1.43206878660699	0	0
10005	ACOT8	4.04357142857143	10.9075268817204	1.43162202765474	0	0
7832	BTG2	13.7116666666667	36.9531182795699	1.43029216817852	0	0
51761	ATP8A2	2.4602380952381	6.63	1.43021092786388	0	0
53339	BTBD1	4.57261904761905	12.3203225806452	1.42994739435755	0	0
54707	GPN2	4.72583333333333	12.7249462365591	1.42901890528463	0	0
150726	FBXO41	5.50130952380952	14.795376344086	1.42729941257385	0	0
23151	GRAMD4	9.69892857142857	26.0264516129032	1.42408134290681	0	0
114799	ESCO1	15.8479761904762	42.5172043010753	1.42374811836875	0	0
155066	ATP6V0E2	159.743095238095	428.268709677419	1.4227627011437	0	0
5126	PCSK2	24.0335714285714	64.4208602150538	1.42247687395618	1	0
10962	MLLT11	885.734166666667	2373.47548387097	1.4220554717902	0	0
54454	ATAD2B	14.6944047619048	39.3547311827957	1.42127016561866	0	0
55614	KIF16B	9.84464285714286	26.3658064516129	1.42125735088487	0	0
2675	GFRA2	8.31202380952381	22.2527956989247	1.42071490652914	0	0
112849	L3HYPDH	4.3677380952381	11.6908602150538	1.42042283251529	0	0
9746	CLSTN3	5.8072619047619	15.5413978494624	1.42018626530132	0	0
22884	WDR37	9.42083333333333	25.2062365591398	1.41985414507949	0	0
4864	NPC1	3.57761904761905	9.56720430107527	1.41909763202785	0	0
10000	AKT3	128.02130952381	342.297419354839	1.41886644458743	0	0
113000	RPUSD1	12.0334523809524	32.1596774193548	1.41820232637738	0	0
4356	MPP3	15.9207142857143	42.5361290322581	1.41778368381201	0	0
151613	TTC14	26.8114285714286	71.489247311828	1.41487817133065	0	0
6616	SNAP25	65.2975	173.839569892473	1.41265684769341	0	1
8609	KLF7	74.8730952380952	199.223978494624	1.41187199837794	0	0
1130	LYST	13.6578571428571	36.3112903225806	1.41068704831537	0	0
2979	GUCA1B	2.89440476190476	7.69225806451613	1.41014047728307	0	0
23247	KIAA0556	4.82595238095238	12.8230107526882	1.409849451119	0	0
27344	PCSK1N	137.150476190476	364.340215053763	1.4095266140302	0	0
146691	TOM1L2	10.1277380952381	26.9030107526882	1.40945563372958	0	0
4745	NELL1	1.52904761904762	4.05817204301075	1.40819669113991	0	0
54981	NMRK1	3.26714285714286	8.6605376344086	1.40642704970051	0	0
26220	DGCR5	12.949880952381	34.2793548387097	1.40440112183404	0	0
22920	KIFAP3	103.803928571429	274.75376344086	1.40427819755539	0	0
1281	COL3A1	1.59630952380952	4.22408602150538	1.40389879809072	0	0
84142	FAM175A	4.2052380952381	11.1174193548387	1.40256254802945	0	0
7576	ZNF28	7.1447619047619	18.8868817204301	1.40242668798382	0	0
8349	HIST2H2BE	63.2175	166.818602150538	1.39988428582968	0	0
93973	ACTR8	17.1640476190476	45.26	1.39884677586168	0	0
222950	NYAP1	2.22988095238095	5.86989247311828	1.39636738533378	0	0
158798	AKAP14	9.2	24.2004301075269	1.39532692206394	0	0
862	RUNX1T1	109.215476190476	287.141720430108	1.3945856576708	0	0
57575	PCDH10	7.06976190476191	18.5710752688172	1.3933238160877	0	0
161823	ADAL	12.0090476190476	31.5031182795699	1.39137289601977	0	0
80854	SETD7	17.9869047619048	47.1288172043011	1.38966252952205	0	0
54978	SLC35F6	7.23380952380952	18.938064516129	1.38846137841063	0	0
55741	EDEM2	15.7167857142857	41.1348387096774	1.38805458870034	0	0
2622	GAS8	2.92940476190476	7.66548387096774	1.38776931534942	0	0
80762	NDFIP1	118.802857142857	310.773333333333	1.38729318250483	0	0
6192	RPS4Y1	31.4119047619048	82.1264516129032	1.38653553768711	0	0
83992	CTTNBP2	120.0925	313.728709677419	1.38537150304792	0	0
5187	PER1	5.5202380952381	14.4198924731183	1.38525800784664	0	0
56255	TMX4	22.8694047619048	59.6037634408602	1.38198461056318	0	0
84707	BEX2	189.989880952381	494.920430107527	1.3812740160317	0	0
85442	KNDC1	3.4125	8.88677419354839	1.38083078477521	0	0
65243	ZFP69B	6.53845238095238	17.0120430107527	1.37953530505278	0	0
29118	DDX25	15.6857142857143	40.782688172043	1.37850564589271	0	0
55745	AP5M1	19.0119047619048	49.3917204301075	1.37736614231718	0	0
57540	PTCHD2	30.0655952380952	78.0839784946237	1.3769130409613	0	0
54332	GDAP1	56.087380952381	145.643440860215	1.37669260846218	0	0
3897	L1CAM	41.7025	108.218924731183	1.37574703311346	1	0
55346	TCP11L1	7.04702380952381	18.2801075268817	1.3751885630392	0	0
10650	SLMO1	16.6972619047619	43.221935483871	1.37215213551206	0	0
374887	YJEFN3	7.97630952380952	20.6423655913979	1.37181501115052	0	0
81572	PDRG1	31.8783333333333	82.4964516129032	1.37175586247132	0	0
8905	AP1S2	54.1075	139.88247311828	1.37031471894632	0	0
54093	SETD4	13.1484523809524	33.9887096774194	1.37016259426241	0	0
54331	GNG2	101.171904761905	261.462043010753	1.36979281054319	0	0
1641	DCX	235.754523809524	608.523548387097	1.36802763829534	0	0
101929570	LOC101929570	21.4778571428571	55.4010752688172	1.36706391547925	0	0
9506	PAGE4	4.4677380952381	11.5240860215054	1.36703581393692	0	0
25989	ULK3	15.5394047619048	40.0711827956989	1.3666338526928	0	0
55906	ZC4H2	43.3316666666667	111.643333333333	1.36540347148926	0	0
221955	DAGLB	15.4654761904762	39.8464516129032	1.36540000026805	0	0
2172	FABP6	30.4963095238095	78.5452688172043	1.36488971010434	0	0
100132273	NDUFA6-AS1	2.1097619047619	5.43204301075269	1.36441470874589	0	0
7355	SLC35A2	6.25714285714286	16.1034408602151	1.36379303756385	0	0
55917	CTTNBP2NL	27.6371428571429	71.1162365591398	1.36357050254521	0	1
79885	HDAC11	4.48619047619048	11.5415053763441	1.36326862792467	0	0
57520	HECW2	5.47321428571429	14.0735483870968	1.36252587678614	0	1
6309	SC5D	37.1367857142857	95.3145161290323	1.35984699755297	0	0
9875	URB1	6.95357142857143	17.8206451612903	1.35772351084423	1	0
2891	GRIA2	222.8725	570.585483870968	1.35622442914928	1	0
5997	RGS2	40.6191666666667	103.957204301075	1.35575719429846	1	0
892	CCNC	28.6855952380952	73.398064516129	1.3554155653299	0	0
90649	ZNF486	6.74761904761905	17.252688172043	1.35437073792188	0	0
57596	BEGAIN	12.7204761904762	32.5238709677419	1.35434629729906	0	0
26164	MTG2	7.84119047619048	20.0450537634409	1.35410167604261	0	0
54511	HMGCLL1	4.35178571428571	11.1175268817204	1.3531564691796	0	0
83999	KREMEN1	5.82464285714286	14.8790322580645	1.35303919813731	1	0
196394	AMN1	23.3546428571429	59.642688172043	1.35263589980449	0	0
91661	ZNF765	3.45130952380952	8.81322580645161	1.35252630453269	0	0
222256	CDHR3	5.96416666666667	15.2054838709677	1.35019924780274	0	0
57474	ZNF490	15.4569047619048	39.4055913978495	1.35014890411195	1	0
8540	AGPS	12.3055952380952	31.3569892473118	1.34947260064344	0	0
2044	EPHA5	61.3864285714286	156.411290322581	1.34935301306484	0	0
84286	TMEM175	9.23964285714286	23.531935483871	1.34871099313586	0	0
57691	KIAA1586	29.1879761904762	74.290752688172	1.34780846102668	0	0
23005	MAPKBP1	9.1625	23.3030107526882	1.34670316499102	0	0
54467	ANKIB1	20.7622619047619	52.7959139784946	1.3464626558537	0	0
1846	DUSP4	18.2704761904762	46.4217204301075	1.34528575525685	0	0
9728	SECISBP2L	33.3028571428571	84.539247311828	1.34397531216551	0	0
84249	PSD2	14.1804761904762	35.9137634408602	1.34063086233123	0	0
1804	DPP6	23.592619047619	59.7503225806452	1.34061091901257	0	0
210	ALAD	4.60452380952381	11.6535483870968	1.33964543919561	0	0
81577	GFOD2	25.2688095238095	63.9433333333333	1.33943625608719	0	0
5641	LGMN	14.1346428571429	35.7640860215054	1.33927614206001	0	0
4211	MEIS1	9.21988095238095	23.3268817204301	1.33917343659556	0	0
79719	AAGAB	6.18904761904762	15.6341935483871	1.33691547597257	0	0
10439	OLFM1	44.6228571428571	112.570107526882	1.33496898173884	0	0
79953	SYNDIG1	11.3186904761905	28.5424731182796	1.33440329114361	0	0
54993	ZSCAN2	12.262619047619	30.9031182795699	1.33348527819289	0	1
9604	RNF14	9.87797619047619	24.8877419354839	1.33314794414139	0	0
147923	ZNF420	8.01119047619048	20.1775268817204	1.33266080654111	0	0
116328	C8orf34	1.22011904761905	3.07118279569892	1.33177246443627	0	0
64802	NMNAT1	7.54178571428571	18.9751612903226	1.33113408401375	0	0
1600	DAB1	15.7966666666667	39.7187096774194	1.33019859523965	0	0
408	ARRB1	20.7288095238095	52.0559139784946	1.32842481140473	0	0
9374	PPT2	10.6725	26.8005376344086	1.32836377969134	0	0
81559	TRIM11	3.93535714285714	9.87408602150538	1.32715264404862	0	0
23237	ARC	15.5622619047619	39.0444086021505	1.3270641956168	0	0
401548	SNX30	7.56440476190476	18.9704301075269	1.32645392137203	0	1
54469	ZFAND6	106.525	267.132795698925	1.32636505395041	0	0
283624	LINC00641	10.5302380952381	26.3955913978495	1.32575893324047	0	0
79637	ARMC7	6.44654761904762	16.1581720430108	1.32566534448617	0	0
7922	SLC39A7	2.94964285714286	7.39010752688172	1.32505507241213	0	0
291	SLC25A4	131.860833333333	329.918817204301	1.32309496156856	0	0
2941	GSTA4	203.394285714286	508.793870967742	1.32280214394334	0	0
1996	ELAVL4	352.285714285714	880.929139784946	1.32228000367811	0	0
23102	TBC1D2B	2.86666666666667	7.16494623655914	1.32158171991715	0	0
84952	CGNL1	3.04678571428571	7.61494623655914	1.3215458146053	0	0
3665	IRF7	5.3577380952381	13.3827956989247	1.32068356590958	0	0
55681	SCYL2	14.7667857142857	36.8658064516129	1.31992748784455	0	0
9605	VPS9D1	8.26821428571429	20.6352688172043	1.31946454815502	0	0
9655	SOCS5	5.39285714285714	13.4556989247312	1.31909560795574	0	0
6855	SYP	16.1446428571429	40.2822580645161	1.31908903060217	0	0
10100	TSPAN2	11.639880952381	29.0412903225806	1.3190292515283	0	0
10085	EDIL3	24.3786904761905	60.8061290322581	1.31859611696018	0	0
266727	MDGA1	10.0645238095238	25.1	1.3184084496307	0	0
30815	ST6GALNAC6	6.10404761904762	15.2176344086021	1.31790598624926	0	0
4883	NPR3	9.18797619047619	22.8804301075269	1.31629514896393	0	0
9077	DIRAS3	22.8858333333333	56.8561290322581	1.31286105333015	0	0
101927811	LOC101927811	4.77738095238095	11.8669892473118	1.31266212958993	0	0
84966	IGSF21	13.562380952381	33.6750537634409	1.31206977505361	0	0
349136	WDR86	2.68333333333333	6.64913978494624	1.30914142528577	0	0
4345	CD200	68.1215476190476	168.79623655914	1.30909962205552	0	0
23474	ETHE1	30.4469047619048	75.3683870967742	1.30766394801799	0	0
55800	SCN3B	39.6989285714286	98.157311827957	1.30599566815937	0	0
57149	LYRM1	33.402380952381	82.5633333333333	1.30555027493991	0	0
23414	ZFPM2	48.3307142857143	119.390215053763	1.30467237968726	0	0
3899	AFF3	46.03	113.581505376344	1.30308159038951	0	0
81545	FBXO38	12.0514285714286	29.7143010752688	1.30195327393202	0	0
2785	GNG3	50.5716666666667	124.606129032258	1.30097380171812	0	0
23154	NCDN	28.4020238095238	69.968064516129	1.30070284999988	0	0
85508	SCRT2	38.2729761904762	94.1654838709677	1.29887224787943	0	0
28512	NKIRAS1	12.7490476190476	31.3379569892473	1.29752165075003	0	0
124565	SLC38A10	8.80690476190476	21.6424731182796	1.29715839779438	0	0
25789	TMEM59L	41.9620238095238	103.105053763441	1.29695888386694	0	0
1408	CRY2	13.3884523809524	32.8724731182796	1.29589079578361	0	0
90203	SNX21	1.46345238095238	3.59290322580645	1.2957742742528	0	0
51534	VTA1	61.3680952380952	150.425483870968	1.29348828699815	0	0
257019	FRMD3	20.3932142857143	49.9621505376344	1.29274639238037	0	0
1749	DLX5	2.98642857142857	7.31602150537634	1.29263809966955	0	0
80328	ULBP2	1.63071428571429	3.99430107526882	1.29243904936965	0	0
94015	TTYH2	4.3952380952381	10.7602150537634	1.2916936868076	0	0
134701	RIPPLY2	4.97809523809524	12.1809677419355	1.29096301914141	0	0
8543	LMO4	31.1429761904762	76.1936559139785	1.29076405739022	0	0
84299	MIEN1	118.429047619048	289.581075268817	1.28994434175539	0	0
10381	TUBB3	1159.13488095238	2833.7811827957	1.28967990829427	0	0
10608	MXD4	31.3665476190476	76.6750537634409	1.28953052640642	0	0
164633	CABP7	14.1953571428571	34.6927956989247	1.28921695758318	0	0
84530	SRRM4	161.912619047619	395.215913978495	1.28742561051927	0	0
54602	NDFIP2	14.9805952380952	36.547311827957	1.28667034633514	0	0
54971	BANP	20.1838095238095	49.2372043010753	1.28655035095181	0	0
343450	KCNT2	4.2827380952381	10.4466666666667	1.28643732001516	0	0
4300	MLLT3	52.7384523809524	128.603548387097	1.28600330878567	0	0
5795	PTPRJ	8.31357142857143	20.2667741935484	1.28557619441541	0	0
1466	CSRP2	532.690119047619	1297.30408602151	1.28414825917561	0	0
8745	ADAM23	13.540119047619	32.9055913978495	1.28109232757742	0	0
80758	PRR7	4.85678571428571	11.7906451612903	1.27956892207133	0	0
84909	C9orf3	3.3325	8.07150537634409	1.27623289316377	0	0
497661	C18orf32	6.48666666666667	15.7110752688172	1.27623271292131	0	0
84557	MAP1LC3A	29.8433333333333	72.2817204301075	1.27622215969529	0	0
23645	PPP1R15A	40.9182142857143	98.9839784946237	1.27445184435753	0	0
4863	NPAT	16.6658333333333	40.3068817204301	1.27413271802466	1	0
2517	FUCA1	5.12761904761905	12.3966666666667	1.27359126005928	0	0
379	ARL4D	173.993452380952	420.466021505376	1.27295620237837	0	0
57717	PCDHB16	3.56011904761905	8.59225806451613	1.27111184005433	0	0
340543	TCEAL5	46.5009523809524	112.21311827957	1.27090917481748	0	0
57224	NHSL1	36.7897619047619	88.7286021505376	1.27009490060607	0	0
2901	GRIK5	11.3309523809524	27.3269892473118	1.27005739299645	0	0
8417	STX7	45.8972619047619	110.510107526882	1.26769833370763	0	0
10370	CITED2	15.1021428571429	36.3518279569892	1.26727464267993	0	0
149111	CNIH3	5.34440476190476	12.8595698924731	1.26674120988996	0	0
6860	SYT4	87.4877380952381	209.910967741935	1.26262481438628	0	0
100129842	ZNF737	14.1830952380952	34.028064516129	1.26255268201428	0	0
131408	FAM131A	7.5577380952381	18.1235483870968	1.2618390168833	0	0
219539	YPEL4	2.16988095238095	5.20301075268817	1.26173079552652	0	0
9900	SV2A	37.9808333333333	91.0494623655914	1.2613789384641	0	0
56658	TRIM39	4.53119047619048	10.8566666666667	1.26061917566856	0	0
11264	PXMP4	17.2552380952381	41.3415053763441	1.26055654201642	0	0
390916	NUDT19	6.78928571428571	16.2513978494624	1.25923211078664	0	0
55959	SULF2	11.2647619047619	26.9401075268817	1.25793878840542	0	0
5817	PVR	6.58202380952381	15.7375268817204	1.25760569192911	0	0
2166	FAAH	5.58154761904762	13.3409677419355	1.25712621741171	0	0
100507341	SMIM18	29.0664285714286	69.4294623655914	1.25619418320697	0	0
79607	FAM118B	25.4286904761905	60.7190322580645	1.25569162901966	0	0
79751	SLC25A22	14.0636904761905	33.5516129032258	1.25440689768855	0	0
55521	TRIM36	78.0928571428571	186.104301075269	1.25284889637639	0	0
8292	COLQ	2.22107142857143	5.28956989247312	1.25189462814009	0	0
5066	PAM	47.9879761904762	114.276451612903	1.25178326880478	0	0
3964	LGALS8	12.6035714285714	29.9917204301075	1.25073167967251	0	0
83482	SCRT1	3.01559523809524	7.17	1.24953032002239	0	0
221421	RSPH9	4.74821428571429	11.2687096774194	1.24686537927699	0	0
2967	GTF2H3	25.5735714285714	60.5940860215054	1.244523342149	0	0
154661	RUNDC3B	11.5589285714286	27.3758064516129	1.24389378834314	1	0
5144	PDE4D	20.1971428571429	47.8055913978495	1.24302814753321	0	0
24145	PANX1	9.06690476190476	21.4118279569892	1.23972592967045	0	0
100507171	BOLA3-AS1	20.5209523809524	48.3375268817204	1.23604597340216	0	0
56262	LRRC8A	16.9719047619048	39.9629032258064	1.23551290781688	0	0
23275	POFUT2	4.4497619047619	10.4672043010753	1.23407611408274	0	0
2026	ENO2	105.429285714286	247.888064516129	1.23341314067889	0	0
26155	NOC2L	1.92392857142857	4.52032258064516	1.23237049235298	0	0
8799	PEX11B	22.6746428571429	53.265376344086	1.23211822702258	1	0
23341	DNAJC16	8.08559523809524	18.9494623655914	1.22873102706323	0	0
440	ASNS	57.3311904761905	134.285698924731	1.22791352783009	0	0
94235	GNG8	13.0460714285714	30.5460215053763	1.22736905458141	0	0
127703	C1orf216	11.9211904761905	27.9084946236559	1.22717599425755	0	0
4293	MAP3K9	15.4829761904762	36.1995698924731	1.22528973803665	0	0
55520	ELAC1	6.38928571428571	14.9311827956989	1.22460189499831	0	0
51619	UBE2D4	15.4765476190476	36.1661290322581	1.22455550751225	0	0
55343	SLC35C1	5.65738095238095	13.2176344086021	1.22425777093537	0	0
79140	CCDC28B	67.392619047619	157.414516129032	1.22390608767535	0	0
79845	RNF122	8.64047619047619	20.1772043010753	1.22354356343785	0	0
64855	FAM129B	7.95190476190476	18.5586021505376	1.22271566626175	0	0
51308	REEP2	47.6822619047619	111.22688172043	1.22198092632782	0	0
440348	NPIPB15	5.14392857142857	11.9877419354839	1.22061741721323	0	0
406	ARNTL	1.66583333333333	3.8810752688172	1.22021234649232	0	0
8193	DPF1	28.5791666666667	66.555376344086	1.21959136193205	0	0
10307	APBB3	17.4291666666667	40.5816129032258	1.2193226135389	0	0
59283	CACNG8	21.495119047619	50.0367741935484	1.21897968330676	0	0
55699	IARS2	24.2145238095238	56.3393548387097	1.21827041109775	0	0
84881	RPUSD4	13.639880952381	31.7308602150538	1.21805558015057	0	0
64747	MFSD1	23.5744047619048	54.7844086021505	1.21654402277227	0	0
8412	BCAR3	2.98607142857143	6.93924731182796	1.21653050865761	0	0
9980	DOPEY2	20.6344047619048	47.9449462365591	1.21632693048217	0	0
6812	STXBP1	87.1654761904762	202.526021505376	1.21627854216779	1	2+
523	ATP6V1A	36.8475	85.5997849462366	1.21604043231414	0	0
90317	ZNF616	2.44964285714286	5.68967741935484	1.21577543164511	0	0
9181	ARHGEF2	39.4804761904762	91.6927956989247	1.21566899490805	0	0
55295	KLHL26	4.9975	11.6011827956989	1.21499343038218	0	0
112483	SAT2	109.994285714286	255.276989247312	1.21463492198885	0	0
10043	TOM1	9.31190476190476	21.6050537634409	1.21422061285016	0	0
57030	SLC17A7	24.2179761904762	56.1496774193548	1.21319942513504	0	0
81533	ITFG1	36.4044047619048	84.3974193548387	1.21308586558296	0	0
55313	CPPED1	6.13488095238095	14.2106451612903	1.21186480050395	0	0
84458	LCOR	42.1872619047619	97.7129032258065	1.21174163131831	0	0
63934	ZNF667	14.0986904761905	32.6449462365591	1.21129849796835	0	0
80031	SEMA6D	11.3016666666667	26.152688172043	1.21042370142539	0	0
4137	MAPT	126.934285714286	293.705483870968	1.21028840051759	0	1
373	TRIM23	10.4690476190476	24.2134408602151	1.20967790397296	0	0
55379	LRRC59	6.28583333333333	14.5336559139785	1.20922173066025	0	0
1903	S1PR3	5.24928571428571	12.1350537634409	1.20898747075694	0	0
5770	PTPN1	27.7546428571429	64.1383870967742	1.2084589456203	0	0
23046	KIF21B	75.0773809523809	173.478602150538	1.20830749520774	0	0
9846	GAB2	9.48761904761905	21.8782795698925	1.20538130595121	0	0
25911	DPCD	23.2064285714286	53.5043010752688	1.20513035924204	0	0
10966	RAB40B	10.3363095238095	23.8068817204301	1.20365748778579	0	0
607	BCL9	15.3585714285714	35.3665591397849	1.20334183352833	0	0
79650	USB1	35.2982142857143	81.2503225806452	1.20277834052368	0	0
374618	TEX9	7.05380952380952	16.2244086021505	1.20169136746976	0	0
3742	KCNA6	12.1477380952381	27.9232258064516	1.20077790776484	0	0
252969	NEIL2	11.2154761904762	25.7616129032258	1.1997320455027	0	0
10159	ATP6AP2	64.3807142857143	147.833978494624	1.19927741156666	0	0
57468	SLC12A5	5.82785714285714	13.3766666666667	1.19868123695472	0	0
4893	NRAS	26.0355952380952	59.7579569892473	1.19864543529239	0	0
100289678	ZNF783	3.45416666666667	7.92709677419355	1.19845489307178	0	0
321	APBA2	51.0711904761905	117.201182795699	1.19840553556201	0	0
729991	MEF2BNB	35.7834523809524	82.0896774193548	1.19790823289779	0	0
5141	PDE4A	6.37083333333333	14.6031182795699	1.19672246728963	0	0
80219	COQ10B	8.80642857142857	20.1825806451613	1.19648169547528	0	0
9382	COG1	5.61333333333333	12.8629032258065	1.19628666569485	0	0
11127	KIF3A	116.020119047619	265.814301075269	1.19604372035952	0	0
4010	LMX1B	3.79011904761905	8.68075268817204	1.19557697672253	0	0
9745	ZNF536	10.1308333333333	23.1912903225806	1.19483024024814	1	0
2823	GPM6A	701.393214285714	1605.35774193548	1.19459944870481	0	0
114044	MCM3AP-AS1	6.88166666666667	15.7413978494624	1.19373374128268	0	0
84280	BTBD10	28.8597619047619	66.014623655914	1.19372625025407	0	0
8045	RASSF7	11.0221428571429	25.2116129032258	1.19368368594518	1	0
9907	AP5Z1	14.7639285714286	33.7456989247312	1.1926269715609	0	0
5552	SRGN	1.55369047619048	3.54978494623656	1.19203250473278	0	0
222962	SLC29A4	18.0221428571429	41.1177419354839	1.18999047843112	0	0
53905	DUOX1	7.7072619047619	17.5755913978495	1.18928291316555	1	0
10493	VAT1	81.9971428571429	186.92688172043	1.18882851031947	0	0
284252	KCTD1	16.6396428571429	37.9145161290323	1.18812584242563	0	0
9704	DHX34	9.24404761904762	21.0497849462366	1.18720889744542	0	0
22845	DOLK	10.6430952380952	24.2297849462366	1.18686382185585	0	0
55715	DOK4	13.5120238095238	30.7603225806452	1.18682685736225	0	0
126731	CCSAP	58.2869047619048	132.457634408602	1.18428730150212	0	0
55739	CARKD	32.3183333333333	73.3640860215054	1.18272119247397	1	0
9950	GOLGA5	8.02261904761905	18.2	1.1817932524982	1	0
55323	LARP6	2.65119047619048	6.01215053763441	1.18124080808132	0	0
10585	POMT1	26.7809523809524	60.7275268817204	1.1811433503533	0	0
27445	PCLO	45.1582142857143	102.38376344086	1.18092660013527	0	0
10233	LRRC23	3.23952380952381	7.33569892473118	1.17915266714871	0	0
11236	RNF139	13.2219047619048	29.9287096774194	1.17860005294442	0	0
2072	ERCC4	12.007619047619	27.1376344086021	1.1763448542931	0	0
9933	KIAA0020	44.5917857142857	100.723225806452	1.17554651348086	0	0
1946	EFNA5	23.412619047619	52.841935483871	1.17439698004933	0	0
57498	KIDINS220	222.725714285714	502.052795698925	1.17257095468342	0	0
54432	YIPF1	13.5054761904762	30.4422580645161	1.17253086636688	0	0
10522	DEAF1	22.5247619047619	50.7448387096774	1.1717492360271	0	0
22933	SIRT2	41.1746428571429	92.7179569892473	1.17109264108814	0	0
2892	GRIA3	38.2360714285714	86.0239784946237	1.16980455455834	0	0
83851	SYT16	4.23666666666667	9.52870967741936	1.16935124146012	0	0
5789	PTPRD	57.4585714285714	129.195698924731	1.16896401260305	0	0
3831	KLC1	105.515119047619	236.997419354839	1.16742161522944	1	0
8723	SNX4	51.2520238095238	115.061290322581	1.16672167498278	0	0
439950	CELF2-AS2	8.15083333333333	18.2975268817204	1.16662919334345	0	0
6585	SLIT1	39.9821428571429	89.7398924731183	1.16639365946174	0	1
85028	SNHG12	7.99869047619048	17.9487096774194	1.16604440290205	0	0
50485	SMARCAL1	7.15738095238095	16.0448387096774	1.16460561262675	0	0
23753	SDF2L1	27.6457142857143	61.967311827957	1.16445153759611	0	0
100505715	LOC100505715	22.1319047619048	49.5983870967742	1.16416558529272	0	0
4062	LY6H	61.1230952380952	136.939784946237	1.16375214432269	0	0
1949	EFNB3	30.6270238095238	68.4838709677419	1.16095907121815	0	0
58158	NEUROD4	13.0516666666667	29.1738709677419	1.16044277727359	0	0
128387	TATDN3	23.0429761904762	51.5021505376344	1.16030561033411	0	0
1268	CNR1	29.4541666666667	65.7538709677419	1.15860409311807	0	0
88745	RRP36	16.3329761904762	36.4147311827957	1.15673449271582	0	0
3704	ITPA	51.8639285714286	115.622688172043	1.15662112360312	0	0
85465	EPT1	9.68464285714286	21.5865591397849	1.15636254627339	0	0
22909	FAN1	5.85904761904762	13.0536559139785	1.15571583587619	0	0
6618	SNAPC2	16.2341666666667	36.1606451612903	1.15538708786579	0	0
55152	DALRD3	3.7922619047619	8.44215053763441	1.15455195074539	0	0
54861	SNRK	23.11	51.4147311827957	1.15366451516733	0	0
54704	PDP1	19.9013095238095	44.2686021505376	1.15342045432662	0	0
5163	PDK1	10.2561904761905	22.8089247311828	1.15310347526002	0	0
63826	SRR	9.70154761904762	21.5644086021505	1.15236533743551	0	0
440465	BAIAP2-AS1	35.5698809523809	79.0175268817204	1.15151654714552	0	0
79176	FBXL15	45.7657142857143	101.634946236559	1.15105744205811	0	0
23031	MAST3	3.78904761904762	8.41301075268817	1.15078691708934	0	0
84932	RAB2B	17.3514285714286	38.4930107526882	1.1495420696432	0	0
5664	PSEN2	2.36154761904762	5.2358064516129	1.14867914039834	0	0
7102	TSPAN7	53.6792857142857	118.994731182796	1.14846031618321	0	0
8546	AP3B1	8.92190476190476	19.7752688172043	1.14827365319834	0	0
51286	CEND1	27.542619047619	60.9737634408602	1.14652284228373	0	0
84255	SLC37A3	31.4736904761905	69.6661290322581	1.14631104973157	0	0
3984	LIMK1	5.34619047619048	11.8323655913978	1.14615538949653	0	0
10186	LHFP	24.8730952380952	54.9920430107527	1.14463683574941	0	0
7107	GPR137B	6.44261904761905	14.2421505376344	1.14444781119404	0	0
150290	DUSP18	21.2121428571429	46.8795698924731	1.14406896375583	0	0
9546	APBA3	7.20928571428571	15.9204301075269	1.14295108086604	0	0
3778	KCNMA1	5.53380952380952	12.2191397849462	1.1427978327544	0	0
1478	CSTF2	14.7682142857143	32.5679569892473	1.14095782965369	0	0
1378	CR1	1.15571428571429	2.54860215053763	1.14092139847284	0	0
81875	ISG20L2	34.5629761904762	76.2113978494624	1.14077932495443	0	0
5818	PVRL1	7.15333333333333	15.7636559139785	1.13991458869147	0	0
80034	CSRNP3	49.214880952381	108.44623655914	1.13981347771079	0	0
23217	ZFR2	18.0454761904762	39.728064516129	1.13852129539451	0	0
8566	PDXK	14.117619047619	31.0751612903226	1.13826508238184	0	0
84870	RSPO3	25.1613095238095	55.3681720430108	1.13784988324984	0	0
9904	RBM19	15.6030952380952	34.3139784946237	1.1369641574948	1	0
285368	PRRT3	3.88785714285714	8.54860215053763	1.13671332392926	0	0
6543	SLC8A2	5.43678571428571	11.9543010752688	1.1367039114335	0	0
283638	CEP170B	6.14702380952381	13.5076344086022	1.13581505942373	0	0
3875	KRT18	7.38916666666667	16.2340860215054	1.13554258842057	0	0
90324	CCDC97	13.4088095238095	29.4441935483871	1.13480200393202	0	0
9752	PCDHA9	1.24761904761905	2.73935483870968	1.13465867187245	0	0
51249	TMEM69	10.9104761904762	23.9549462365591	1.13460950572844	0	0
84804	MFSD9	4.21678571428571	9.25612903225806	1.13426526644191	0	0
56271	BEX4	261.417261904762	572.98376344086	1.13213984979955	0	0
10472	ZBTB18	186.989523809524	409.64064516129	1.1314014242158	0	0
2058	EPRS	47.6625	104.398494623656	1.13117437802151	0	0
51209	RAB9B	12.8608333333333	28.1554838709677	1.13043181791573	0	0
10948	STARD3	18.3811904761905	40.2384946236559	1.13034612574559	0	0
64837	KLC2	15.8283333333333	34.6435483870968	1.13007735370941	0	0
8643	PTCH2	4.00357142857143	8.75623655913978	1.12902338514169	0	0
7280	TUBB2A	595.077261904762	1301.20129032258	1.1286952600035	0	1
8453	CUL2	20.0405952380952	43.7975268817204	1.12792404781002	0	0
79666	PLEKHF2	5.69928571428571	12.4394623655914	1.12607110922904	0	0
57522	SRGAP1	90.5369047619048	197.448602150538	1.12489926390394	0	0
51027	BOLA1	23.4659523809524	51.1131182795699	1.12312459485625	0	0
78997	GDAP1L1	70.557619047619	153.677956989247	1.1230364615243	0	0
84896	ATAD1	31.9722619047619	69.6256989247312	1.12279909234117	0	0
58489	ABHD17C	20.1892857142857	43.9403225806452	1.12195559128514	0	0
22834	ZNF652	66.9169047619048	145.63	1.12186496326527	0	0
23085	ERC1	55.1485714285714	119.919569892473	1.12067169422272	0	0
80741	LY6G5C	5.64452380952381	12.2691397849462	1.12011032140371	0	0
25930	PTPN23	14.3663095238095	31.2087096774194	1.11925920633244	0	0
8891	EIF2B3	36.7017857142857	79.7039784946237	1.11880148074571	0	0
2982	GUCY1A3	26.4407142857143	57.3940860215054	1.11814093573005	0	0
57037	ANKMY2	25.0844047619048	54.4054838709677	1.11696137290567	0	0
2562	GABRB3	35.6032142857143	77.1432258064516	1.1155319799941	1	2+
6659	SOX4	3284.04988095238	7114.10172043011	1.11520556264438	0	0
50862	RNF141	28.8191666666667	62.428064516129	1.1151661187684	0	0
64718	UNKL	8.57083333333333	18.5572043010753	1.11447199243769	0	0
288	ANK3	201.970833333333	437.010752688172	1.11352180979229	0	1
23048	FNBP1	32.6395238095238	70.6136559139785	1.11332720259269	0	0
151473	SLC16A14	16.1242857142857	34.8724731182796	1.11285342975978	0	0
9213	XPR1	161.939761904762	349.943870967742	1.11166627893994	0	0
7108	TM7SF2	37.4554761904762	80.9055913978495	1.11106274715856	0	0
9910	RABGAP1L	19.9915476190476	43.18	1.11097308263853	0	0
151050	KANSL1L	5.80464285714286	12.5248387096774	1.10951281494934	0	0
4828	NMB	2.97666666666667	6.42182795698925	1.10928634065273	0	0
6900	CNTN2	16.8888095238095	36.412688172043	1.10837361437097	0	0
56127	PCDHB9	8.89321428571429	19.1736559139785	1.10834859387213	0	0
50863	NTM	33.552380952381	72.3059139784946	1.10769850464035	0	0
8013	NR4A3	5.81238095238095	12.5215053763441	1.10720685058293	0	0
100507577	LOC100507577	5.95309523809524	12.8233333333333	1.10705944889907	0	0
2770	GNAI1	53.077619047619	114.234731182796	1.10582578403412	0	0
57535	KIAA1324	11.6210714285714	25.0052688172043	1.10548902760034	0	0
9143	SYNGR3	8.82702380952381	18.9930107526882	1.10546962387451	0	0
57343	ZNF304	5.48	11.7739784946237	1.10335409935971	0	0
5771	PTPN2	43.8628571428571	94.1739784946237	1.1023286898652	0	0
5052	PRDX1	633.29630952381	1358.92827956989	1.10151673933898	0	0
57794	SUGP1	33.3985714285714	71.6113978494624	1.10040283371676	0	0
51400	PPME1	46.1242857142857	98.8958064516129	1.10038277705618	0	0
81037	CLPTM1L	20.7127380952381	44.4002150537634	1.10004838284599	0	0
253512	SLC25A30	2.55178571428571	5.46645161290323	1.09909746941345	1	0
79759	ZNF668	10.3438095238095	22.1556989247312	1.09891022488581	0	0
6878	TAF6	18.4572619047619	39.5041935483871	1.09781726186686	0	0
6508	SLC4A3	14.4425	30.900752688172	1.09732148540202	0	0
1780	DYNC1I1	20.2782142857143	43.3751612903226	1.09693850919416	0	0
111	ADCY5	16.367619047619	35.0006451612903	1.09653704306155	0	0
2002	ELK1	7.9777380952381	17.0444086021505	1.09524687604995	0	0
9540	TP53I3	11.5332142857143	24.6370967741935	1.09503761393517	0	0
116987	AGAP1	36.0997619047619	77.0634408602151	1.09405728147113	0	0
54862	CC2D1A	9.15964285714286	19.5404301075269	1.09309897051507	1	0
80816	ASXL3	11.5429761904762	24.6178494623656	1.09268948791795	3+	0
7965	AIMP2	2.30119047619048	4.9052688172043	1.09195179624613	0	0
10813	UTP14A	12.8692857142857	27.427311827957	1.09168124777667	0	0
10579	TACC2	33.3882142857143	71.1221505376344	1.09096001267666	0	0
7556	ZNF10	9.32559523809524	19.8591397849462	1.09053541431386	0	0
1944	EFNA3	12.9097619047619	27.4875268817204	1.09031471676992	0	0
100128288	LOC100128288	4.82714285714286	10.2778494623656	1.09029699809656	0	0
8563	THOC5	9.17880952380952	19.5381720430108	1.08991654185168	0	0
28955	DEXI	12.4622619047619	26.5195698924731	1.08949143553025	0	0
158381	ATP8B5P	5.26690476190476	11.2078494623656	1.08948220602793	0	0
9545	RAB3D	19.6308333333333	41.7670967741935	1.08924544859322	0	0
283731	LOC283731	10.5620238095238	22.4637634408602	1.08871334951523	0	0
22839	DLGAP4	117.422142857143	249.720430107527	1.088609365712	0	0
56654	NPDC1	84.1410714285714	178.873010752688	1.08805362861877	0	0
440730	TRIM67	6.92059523809524	14.7091397849462	1.08774484381296	0	0
84941	HSH2D	4.56857142857143	9.70752688172043	1.08736068554844	0	0
85365	ALG2	8.7097619047619	18.5050537634409	1.08721414105628	0	0
25977	NECAP1	41.4376190476191	87.9702150537634	1.08607402888606	0	0
10507	SEMA4D	24.4042857142857	51.7477419354839	1.08436138423836	0	0
147906	DACT3	3.80666666666667	8.06860215053763	1.08379050978023	0	0
57144	PAK7	49.3329761904762	104.558279569892	1.0836830770739	0	0
94241	TP53INP1	8.91583333333333	18.8868817204301	1.08294297502496	0	0
11094	CACFD1	33.8010714285714	71.589247311828	1.08267393343042	0	0
100128822	LINC01003	8.32559523809524	17.6161290322581	1.08127161490509	0	0
11343	MGLL	37.8788095238095	80.1464516129032	1.08124765851719	0	0
55297	CCDC91	37.9771428571429	80.325376344086	1.08072446412023	0	0
10325	RRAGB	15.1469047619048	32.0340860215054	1.08058481680498	0	0
283232	TMEM80	10.0132142857143	21.1663440860215	1.07986694432218	0	0
84947	SERAC1	4.55559523809524	9.6289247311828	1.07973513013958	0	0
144363	LYRM5	3.02202380952381	6.38677419354839	1.07957241740329	0	0
5926	ARID4A	125.235357142857	264.458924731183	1.07840173355627	0	0
7057	THBS1	4.55845238095238	9.62494623655914	1.07823437724157	0	0
114785	MBD6	9.09821428571429	19.195376344086	1.0771035266855	0	0
153020	RASGEF1B	21.0527380952381	44.4144086021505	1.07701990045521	0	0
10740	RFPL1S	17.3971428571429	36.6906451612903	1.0765618819984	0	0
24140	FTSJ1	39.9154761904762	84.1793548387097	1.07651823022886	0	0
157638	FAM84B	9.83440476190476	20.7333333333333	1.07604244006972	0	0
51605	TRMT6	24.1033333333333	50.7435483870968	1.07399173194826	0	0
65264	UBE2Z	13.4780952380952	28.3667741935484	1.07358547461985	0	0
26993	AKAP8L	10.0453571428571	21.1293548387097	1.07271985970167	0	0
217	ALDH2	54.647619047619	114.912795698925	1.07230890769151	0	0
25817	FAM19A5	27.7804761904762	58.4163440860215	1.07230074268001	0	0
22858	ICK	55.4835714285714	116.646666666667	1.07201252021456	0	0
79654	HECTD3	16.5067857142857	34.6976344086021	1.07177808844377	0	0
157627	LINC00599	11.520119047619	24.2144086021505	1.07171014236576	0	0
5868	RAB5A	26.8504761904762	56.4234408602151	1.07134697372193	0	0
349667	RTN4RL2	8.3377380952381	17.5124731182796	1.07065487603451	0	0
64598	MOSPD3	18.0707142857143	37.9382795698925	1.07000072360473	0	0
8760	CDS2	55.2917857142857	116.038817204301	1.06947042406831	0	1
1831	TSC22D3	15.6320238095238	32.7997849462366	1.06918178593227	0	0
145482	PTGR2	5.57130952380952	11.6824731182796	1.06825734275123	0	0
654466	KGFLP2	2.63107142857143	5.51698924731183	1.06823075318683	0	0
10438	C1D	44.8194047619048	93.9311827956989	1.06748068713315	0	0
91975	ZNF300	43.0986904761905	90.3218279569893	1.06743064935693	0	0
54468	MIOS	14.9121428571429	31.2365591397849	1.06674795622168	0	0
7163	TPD52	5.60761904761905	11.7303225806452	1.06478243901267	0	0
6844	VAMP2	254.475238095238	531.921182795699	1.06368721021068	0	0
9107	MTMR6	28.1034523809524	58.738064516129	1.06354835821762	0	0
55885	LMO3	59.5492857142857	124.442795698925	1.06332660318228	0	0
259295	TAS2R20	5.48702380952381	11.4622580645161	1.06279554183889	0	0
23090	ZNF423	23.3869047619048	48.8418279569892	1.06241626092859	0	0
100009676	ZBTB11-AS1	7.80107142857143	16.2838709677419	1.06169950694719	0	0
57661	PHRF1	5.99154761904762	12.4969892473118	1.0605799602499	0	0
219988	PATL1	11.120119047619	23.1906451612903	1.0603707230958	0	0
84267	C9orf64	8.65190476190476	18.0430107526882	1.06035040478594	0	0
6506	SLC1A2	56.6335714285714	118.104086021505	1.06032946110669	0	1
5613	PRKX	90.7861904761905	189.298494623656	1.06011816781021	0	1
22848	AAK1	193.411904761905	403.025053763441	1.05919292828285	0	0
5833	PCYT2	9.66952380952381	20.1488172043011	1.05917840189246	0	0
64689	GORASP1	6.3975	13.3143010752688	1.0573965499125	0	0
1843	DUSP1	84.1029761904762	175.005053763441	1.05716782473311	0	0
5526	PPP2R5B	6.03702380952381	12.5603225806452	1.05696412059446	0	0
57658	CALCOCO1	18.4153571428571	38.3136559139785	1.0569493184519	0	0
54877	ZCCHC2	4.15476190476191	8.64182795698925	1.05657070635939	0	0
57731	SPTBN4	4.65571428571429	9.67720430107527	1.05558779495675	0	0
23329	TBC1D30	9.69059523809524	20.14	1.05540649332714	0	0
386758	ZNF582-AS1	8.16988095238095	16.9740860215054	1.05494693252528	0	0
2775	GNAO1	72.6239285714286	150.763870967742	1.05377386324095	0	2+
322	APBB1	110.320476190476	228.982043010753	1.05353387597478	0	0
56122	PCDHB14	9.73464285714286	20.2032258064516	1.05338570775481	0	0
57175	CORO1B	21.39	44.3841935483871	1.0531095015178	0	0
9554	SEC22B	13.5770238095238	28.1695698924731	1.05297027193655	0	0
1	A1BG	14.3959523809524	29.867311827957	1.05290416020767	0	0
1363	CPE	87.1514285714286	180.656344086022	1.05165170052978	0	0
54480	CHPF2	4.42202380952381	9.16602150537634	1.05158887749141	0	0
2054	STX2	17.9459523809524	37.1966666666667	1.05151485364392	0	0
84302	TMEM246	19.3828571428571	40.1698924731183	1.05133335173488	0	0
54626	HES2	2.88607142857143	5.97903225806452	1.0508049884197	0	0
5796	PTPRK	54.8394047619048	113.601935483871	1.05070259784487	0	0
23228	PLCL2	14.297619047619	29.6166666666667	1.05063435749329	0	0
101927151	LOC101927151	12.974880952381	26.8624731182796	1.04987083235132	0	0
85455	DISP2	5.88095238095238	12.1718279569892	1.04942413338108	0	0
100293516	ZNF587B	7.5427380952381	15.6094623655914	1.04926061010082	0	0
116841	SNAP47	37.6865476190476	77.9604301075269	1.04869241099729	0	0
140597	TCEAL2	153.965952380952	318.488709677419	1.04863087784557	0	0
90075	ZNF30	8.30452380952381	17.1781720430108	1.04860717517732	0	0
57611	ISLR2	13.0904761904762	27.074623655914	1.04842370518918	0	0
79050	NOC4L	20.2780952380952	41.9021505376344	1.04710214555605	0	0
9906	SLC35E2	24.8397619047619	51.2962365591398	1.04620163875546	0	0
55055	ZWILCH	17.9191666666667	36.9841935483871	1.04540527150107	1	0
4130	MAP1A	54.3592857142857	112.186774193548	1.04530420106387	0	0
6503	SLA	52.2763095238095	107.885376344086	1.04527012157837	0	0
223082	ZNRF2	5.07702380952381	10.4750537634409	1.04490271765962	0	0
4886	NPY1R	1.61261904761905	3.32666666666667	1.04467164697527	0	0
114787	GPRIN1	14.4490476190476	29.8003225806452	1.04435354415193	1	0
79602	ADIPOR2	15.1016666666667	31.1267741935484	1.04344829300536	0	0
55224	ETNK2	1.73357142857143	3.57204301075269	1.04300217064818	0	0
84100	ARL6	6.00904761904762	12.3793548387097	1.04272786940199	0	0
3880	KRT19	6.16690476190476	12.7013978494624	1.04236880975456	0	0
4122	MAN2A2	11.7710714285714	24.2418279569892	1.04225284584887	0	1
9066	SYT7	22.0178571428571	45.3134408602151	1.04126497809416	0	0
126129	CPT1C	35.5251190476191	73.0291397849462	1.03963275300582	0	0
81796	SLCO5A1	23.5883333333333	48.4872043010753	1.03953058597296	0	0
55090	MED9	14.3183333333333	29.4124731182796	1.03856452549366	0	0
116442	RAB39B	11.9861904761905	24.6150537634409	1.03816768515834	0	0
375260	WASH2P	8.62714285714286	17.7159139784946	1.03809114627079	0	0
55662	HIF1AN	10.8663095238095	22.3110752688172	1.0378979976002	0	0
155060	LOC155060	7.07130952380952	14.5129032258065	1.03728683628255	0	0
6509	SLC1A4	7.68464285714286	15.7684946236559	1.03699481892733	0	0
1690	COCH	5.51440476190476	11.3090322580645	1.03619840825169	0	0
4598	MVK	17.2675	35.3951612903226	1.03549292593586	0	0
9262	STK17B	24.345119047619	49.8322580645161	1.03344739338679	0	0
84898	PLXDC2	15.7279761904762	32.1886021505376	1.03321688368691	0	0
29115	SAP30BP	72.4184523809524	148.172043010753	1.03284401557729	0	0
56605	ERO1LB	5.7225	11.7024731182796	1.03209598814907	0	0
92799	SHKBP1	19.8379761904762	40.5406451612903	1.03110419404037	0	0
168455	CCDC71L	7.62357142857143	15.5765591397849	1.03083765421743	0	0
22911	WDR47	45.3184523809524	92.5862365591398	1.03069915090735	0	0
4832	NME3	51.5369047619048	105.256129032258	1.03022644486667	0	0
56674	TMEM9B	18.9313095238095	38.6430107526882	1.0294332926018	0	0
57787	MARK4	7.03654761904762	14.3244086021505	1.02553590709466	0	0
9788	MTSS1	29.2922619047619	59.6293548387097	1.02550312729427	0	0
7345	UCHL1	669.931547619048	1363.56193548387	1.02529463532458	0	0
5428	POLG	2.25940476190476	4.59827956989247	1.02515143683121	0	0
54851	ANKRD49	36.0567857142857	73.3513978494624	1.02455366612938	0	0
7692	ZNF133	9.45464285714286	19.231935483871	1.02440909398464	0	0
2487	FRZB	8.7675	17.8336559139785	1.0243650563489	0	0
83891	SNX25	6.16738095238095	12.5383870967742	1.02362190792312	0	0
149175	MANEAL	12.0346428571429	24.4618279569892	1.02333888735177	0	0
4004	LMO1	9.39702380952381	19.0972043010753	1.02308564388946	0	0
79603	CERS4	13.7772619047619	27.9696774193548	1.02157441989391	0	0
26608	TBL2	15.5883333333333	31.630752688172	1.02086119992378	0	0
284485	RIIAD1	22.1217857142857	44.8782795698925	1.0205495231393	0	0
5502	PPP1R1A	7.05011904761905	14.2981720430108	1.02011119268352	0	0
57403	RAB22A	13.1455952380952	26.6329032258065	1.01863023457136	0	0
54552	GNL3L	22.4741666666667	45.505376344086	1.01776938395651	0	0
51617	HMP19	135.612142857143	274.482150537634	1.01722596968649	0	0
8559	PRPF18	26.0665476190476	52.7467741935484	1.01688334843895	0	0
112950	MED8	36.2764285714286	73.4067741935484	1.01688077639687	0	0
151987	PPP4R2	6.04047619047619	12.1976344086022	1.01386718923703	0	0
9117	SEC22C	30.7021428571429	61.9870967741935	1.01362858348325	0	0
828	CAPS	3.855	7.77795698924731	1.0126603968006	0	0
7920	ABHD16A	59.9322619047619	120.882580645161	1.01220163628848	0	0
117177	RAB3IP	22.2863095238095	44.9218279569892	1.01125890009018	0	0
85464	SSH2	14.6833333333333	29.5929032258065	1.01107172133174	0	0
373156	GSTK1	23.1030952380952	46.5364516129032	1.01027506026247	0	0
79692	ZNF322	21.8378571428571	43.9767741935484	1.00991048518014	0	0
56946	C11orf30	25.0359523809524	50.370752688172	1.00858495193962	1	0
10020	GNE	7.45107142857143	14.965376344086	1.00610876140846	0	0
22882	ZHX2	3.53702380952381	7.09827956989247	1.00493346631306	0	0
21	ABCA3	14.0060714285714	28.1066666666667	1.00486001614663	1	0
90809	TMEM55B	7.04488095238095	14.1365591397849	1.00478377615332	0	0
1958	EGR1	7.17916666666667	14.405376344086	1.00471905603245	0	0
51661	FKBP7	26.83	53.8260215053763	1.00445673939011	0	0
4257	MGST1	4.215	8.45268817204301	1.00387759729545	0	0
2259	FGF14	3.82952380952381	7.67795698924731	1.00355747020141	0	0
26469	PTPN18	10.1154761904762	20.2749462365591	1.0031338518308	0	0
9039	UBA3	49.3941666666667	98.9767741935484	1.00274935027933	0	0
4189	DNAJB9	29.8778571428571	59.858064516129	1.00246894977101	0	0
2835	GPR12	23.7695238095238	47.62	1.00245461949534	0	0
84933	C8orf76	15.7280952380952	31.4986021505376	1.00194384315983	0	0
5578	PRKCA	33.5542857142857	67.1709677419355	1.00134076805588	0	0
56853	CELF4	64.9004761904762	129.921505376344	1.00133928519395	1	0
6328	SCN3A	25.5344047619048	51.0715053763441	1.00007615588589	0	0
5362	PLXNA2	65.7527380952381	131.491720430108	0.99984908305077	0	0
23071	ERP44	28.7275	57.4152688172043	0.999002004900589	0	0
203	AK1	165.836428571429	331.345913978495	0.998577176572806	0	0
6049	RNF6	7.92321428571429	15.8251612903226	0.99806247771392	0	0
1827	RCAN1	23.2235714285714	46.3791397849462	0.997886208306922	0	0
25862	USP49	49.5325	98.8694623655914	0.997149548756016	0	0
904	CCNT1	16.4177380952381	32.7625806451613	0.996793621942768	0	0
113655	MFSD3	12.5235714285714	24.9740860215054	0.995785836862376	1	0
2743	GLRB	16.3734523809524	32.6405376344086	0.995306271140522	0	0
25875	LETMD1	14.4439285714286	28.7902150537634	0.995115374459602	0	0
9063	PIAS2	14.2270238095238	28.3536559139785	0.99490087587358	0	0
100507602	TRIM52-AS1	41.8408333333333	83.2875268817204	0.993188868470377	0	0
8772	FADD	6.06190476190476	12.0648387096774	0.992965537483542	0	0
7753	ZNF202	5.30892857142857	10.5655913978495	0.992880886792947	0	0
5681	PSKH1	6.485	12.9060215053763	0.992865854978028	0	0
777	CACNA1E	57.1879761904762	113.698494623656	0.991429396549143	0	1
8674	VAMP4	13.745119047619	27.3220430107527	0.991145963239796	0	0
5934	RBL2	7.84464285714286	15.5763440860215	0.989576986820137	0	0
55622	TTC27	8.0475	15.9783870967742	0.989509209114589	0	0
10865	ARID5A	6.76869047619048	13.434623655914	0.989007256862973	0	0
201283	AMZ2P1	63.9477380952381	126.918279569892	0.988934634823433	0	0
55208	DCUN1D2	4.94059523809524	9.80376344086022	0.988650806455463	0	0
8120	AP3B2	18.6842857142857	37.0477419354839	0.987560201103855	0	0
896	CCND3	13.3489285714286	26.4636559139785	0.987288430371925	0	0
282991	BLOC1S2	71.8016666666667	142.309569892473	0.986943444533268	0	0
53353	LRP1B	12.3660714285714	24.5091397849462	0.986932605787607	0	0
26504	CNNM4	5.51666666666667	10.9334408602151	0.986878786323322	0	0
63893	UBE2O	26.1190476190476	51.7324731182796	0.985967869811586	0	0
93185	IGSF8	26.3032142857143	52.0865591397849	0.98567202575886	0	0
2035	EPB41	15.2017857142857	30.1004301075269	0.985543298657921	0	0
84866	TMEM25	21.4041666666667	42.3747311827957	0.985312548245035	0	0
4294	MAP3K10	5.01440476190476	9.9258064516129	0.985105868087293	0	0
285382	C3orf70	13.0386904761905	25.8050537634409	0.984854654745747	0	0
65251	ZNF649	15.5941666666667	30.8370967741935	0.983660487071115	0	0
490	ATP2B1	81.4885714285714	161.075698924731	0.983069210563927	0	0
54505	DHX29	77.8414285714286	153.860752688172	0.983015178864429	1	0
25880	TMEM186	13.9355952380952	27.5424731182796	0.982883482730051	0	0
2794	GNL1	24.0279761904762	47.4840860215054	0.982728945313839	0	0
5993	RFX5	7.23559523809524	14.2979569892473	0.982625407061083	0	0
10168	ZNF197	18.1302380952381	35.824623655914	0.982553677407249	0	0
11079	RER1	21.5364285714286	42.5012903225806	0.980727616830016	0	0
1022	CDK7	19.4619047619048	38.4039784946237	0.9806028605091	0	0
4690	NCK1	5.91880952380952	11.6779569892473	0.980408968157023	0	0
11179	ZNF277	21.0422619047619	41.5165591397849	0.980397086010312	0	0
11007	CCDC85B	14.0866666666667	27.7860215053763	0.980029012917946	0	0
79753	SNIP1	3.7022619047619	7.30204301075269	0.979893208913361	0	0
549	AUH	10.8510714285714	21.3716129032258	0.977858290879983	0	0
11034	DSTN	326.255238095238	641.982688172043	0.976533329246362	0	0
100505678	STARD4-AS1	32.0113095238095	62.9315053763441	0.975200757750964	0	0
4008	LMO7	34.4472619047619	67.7156989247312	0.975101028384258	0	0
138428	PTRH1	9.71059523809524	19.084623655914	0.974779099747189	0	0
5142	PDE4B	18.3392857142857	36.0417204301075	0.974730429612398	0	0
84233	TMEM126A	46.8917857142857	91.9666666666667	0.971775830615249	0	0
57415	C3orf14	242.148928571429	474.754838709677	0.971288084915625	0	0
5101	PCDH9	63.4229761904762	124.337741935484	0.971186799687676	0	0
100303755	PET117	9.86559523809524	19.3395698924731	0.971077706656551	0	0
57407	NMRAL1	41.949880952381	82.1721505376344	0.969982807697325	0	0
23710	GABARAPL1	30.2454761904762	59.2283870967742	0.969569424370468	0	0
153733	CCDC112	103.888928571429	203.375053763441	0.969100812657636	0	0
10777	ARPP21	74.3239285714286	145.496021505376	0.969081038117354	0	0
1952	CELSR2	63.4419047619048	124.134838709677	0.968400075889924	0	0
6456	SH3GL2	35.1439285714286	68.7608602150538	0.968312121065367	0	0
8411	EEA1	22.925	44.8447311827957	0.96801675872725	0	0
157807	CLVS1	23.487380952381	45.9425806451613	0.967946047503505	0	0
51318	MRPL35	19.7928571428571	38.7024731182796	0.967445875006841	0	0
537	ATP6AP1	86.9745238095238	170.049677419355	0.967291489144511	0	0
11054	OGFR	8.77797619047619	17.1548387096774	0.9666552995698	0	0
283209	PGM2L1	111.75619047619	218.383870967742	0.966511559641149	0	0
53335	BCL11A	623.3625	1217.03903225806	0.965232164580187	2	0
9912	ARHGAP44	7.66369047619048	14.9617204301075	0.965164879227479	1	0
3796	KIF2A	58.4310714285714	114.039892473118	0.964730935294584	0	0
4826	NNAT	2493.79583333333	4864.27064516129	0.963880144929641	0	0
6945	MLX	10.0016666666667	19.4996774193548	0.963209828716276	0	0
162632	USP32P1	2.86880952380952	5.5894623655914	0.962257338276071	0	0
84467	FBN3	16.2059523809524	31.5594623655914	0.961548821865291	0	0
26512	INTS6	12.5082142857143	24.3469892473118	0.96086753917122	1	0
6621	SNAPC4	8.24845238095238	16.05	0.960377933697294	0	0
1627	DBN1	260.952738095238	507.620967741935	0.959963122445301	0	0
6881	TAF10	26.5014285714286	51.551935483871	0.959956462759534	0	0
2932	GSK3B	17.1554761904762	33.3656989247312	0.959696553045679	0	0
92675	DTD1	137.950833333333	268.277956989247	0.959574348936801	0	0
4355	MPP2	14.6585714285714	28.4817204301075	0.958291784039843	0	0
1004	CDH6	7.01761904761905	13.6320430107527	0.957948254475105	0	0
57161	PELI2	26.5458333333333	51.5467741935484	0.957396714691366	0	1
9750	FAM65B	12.774880952381	24.7654838709677	0.955020961875429	0	0
23307	FKBP15	13.3004761904762	25.7840860215054	0.955003007913429	1	0
11313	LYPLA2	55.2329761904762	107.070215053763	0.954955431686032	0	0
23221	RHOBTB2	7.32952380952381	14.204623655914	0.954569232252884	0	1
6827	SUPT4H1	76.4239285714286	148.018279569892	0.953679026550682	0	0
347744	C6orf52	6.51107142857143	12.6062365591398	0.95317077008069	0	0
7566	ZNF18	5.01559523809524	9.71043010752688	0.953114272484498	0	0
55160	ARHGEF10L	9.32190476190476	18.0462365591398	0.953001323926986	0	0
221302	ZUFSP	20.9722619047619	40.599247311828	0.952970513197464	0	0
22936	ELL2	2.01369047619048	3.89655913978495	0.952358768794287	0	0
7846	TUBA1A	5586.72726190476	10808.6435483871	0.952110184346818	0	1
51199	NIN	14.2240476190476	27.5152688172043	0.951900364380464	1	0
11182	SLC2A6	15.8890476190476	30.7345161290323	0.951827119165951	0	0
56834	GPR137	10.1903571428571	19.7040860215054	0.951290216568841	0	0
2258	FGF13	53.5545238095238	103.49623655914	0.950497956585846	0	0
51660	MPC1	49.4813095238095	95.5786021505376	0.949803986364874	0	0
25874	MPC2	122.928333333333	237.085053763441	0.947587239879878	0	0
126070	ZNF440	3.96071428571429	7.6347311827957	0.946816727724829	0	0
57799	RAB40C	15.4333333333333	29.7463440860215	0.946662675048793	0	0
79571	GCC1	8.92369047619048	17.1786021505376	0.944900268143734	0	0
79031	PDCL3	72.3333333333333	139.234731182796	0.944786584865171	0	0
79158	GNPTAB	24.9242857142857	47.9286021505376	0.9433347038739	0	0
23149	FCHO1	14.4266666666667	27.7374193548387	0.94309556942104	0	0
54715	RBFOX1	54.8129761904762	105.378279569892	0.94298815503428	0	0
727956	SDHAP2	2.16214285714286	4.15440860215054	0.942181269801747	0	0
5523	PPP2R3A	30.3730952380952	58.3568817204301	0.9421088583534	0	0
5358	PLS3	8.00238095238095	15.372688172043	0.941868251729634	0	0
10531	PITRM1	8.89452380952381	17.0805376344086	0.941364112165972	0	0
23705	CADM1	184.705952380952	354.449784946237	0.940350894986688	0	0
6809	STX3	6.29202380952381	12.0689247311828	0.939701111191488	0	0
8460	TPST1	7.85678571428571	15.0703225806452	0.939699180149018	0	0
57461	ISY1	38.2057142857143	73.221935483871	0.93848747617328	0	0
339263	C17orf51	18.5165476190476	35.4865591397849	0.938457558609149	0	0
4035	LRP1	41.4490476190476	79.4198924731183	0.938161454511019	0	0
2896	GRN	29.8908333333333	57.2502150537634	0.93757799373612	0	0
3858	KRT10	62.6854761904762	120.044516129032	0.937366375935705	0	0
5160	PDHA1	99.302619047619	190.09935483871	0.936849962167198	0	0
79661	NEIL1	2.32416666666667	4.44698924731183	0.936115387767364	0	0
23171	GPD1L	15.5991666666667	29.8415053763441	0.935851355238476	0	0
10715	CERS1	9.30047619047619	17.7908602150538	0.935759778627224	0	0
64919	BCL11B	269.90119047619	516.027419354839	0.935016385714576	0	0
65991	FUNDC2	123.350476190476	235.721075268817	0.934317467210883	0	0
527	ATP6V0C	138.647619047619	264.905053763441	0.934052525550242	0	0
100288332	NPIPA5	1.84166666666667	3.51731182795699	0.933461279256735	0	0
441518	FAM127C	38.4742857142857	73.479247311828	0.933442305438341	0	0
26153	KIF26A	10.9127380952381	20.8396774193548	0.933319815019407	0	0
84253	GARNL3	11.5078571428571	21.9745161290323	0.933212181231078	0	0
10554	AGPAT1	20.8809523809524	39.8674193548387	0.933022706948085	0	0
10490	VTI1B	17.8269047619048	34.0234408602151	0.932472817681216	0	0
60680	CELF5	83.8947619047619	159.978172043011	0.931222430640945	0	0
50640	PNPLA8	42.379880952381	80.8095698924731	0.931146619497527	0	0
10745	PHTF1	14.6725	27.9679569892473	0.930660163177193	0	0
23483	TGDS	6.03869047619048	11.5069892473118	0.930202775996059	0	0
27433	TOR2A	23.1735714285714	44.1516129032258	0.929985737573799	0	0
100507053	LOC100507053	5.55571428571429	10.5815053763441	0.929500574141355	0	0
90135	BTBD6	15.2105952380952	28.9449462365591	0.928234865523118	1	0
27242	TNFRSF21	12.8409523809524	24.4323655913979	0.928041347570286	0	0
10237	SLC35B1	72.8058333333333	138.496989247312	0.927728662745775	0	0
83985	SPNS1	29.6135714285714	56.324623655914	0.927507277259382	0	0
29088	MRPL15	93.1520238095238	177.040752688172	0.926422471440989	0	0
10217	CTDSPL	18.2159523809524	34.595376344086	0.925376810040866	0	0
5900	RALGDS	33.6375	63.8834408602151	0.925371534746305	0	0
25900	IFFO1	17.364880952381	32.9554838709677	0.924346032963068	0	0
64975	MRPL41	167.886428571429	318.084838709677	0.921925996564244	0	0
9929	JOSD1	19.6804761904762	37.2520430107527	0.920554420679402	0	0
25822	DNAJB5	22.0347619047619	41.7068817204301	0.920504143182648	0	0
23641	LDOC1	96.4208333333333	182.277741935484	0.91872159998002	0	0
6096	RORB	5.41107142857143	10.2232258064516	0.917864301058544	0	0
64848	YTHDC2	25.0292857142857	47.2786021505376	0.917570261124762	0	0
4208	MEF2C	92.7409523809524	175.169569892473	0.917473727295098	0	1
6804	STX1A	31.8480952380952	60.1520430107527	0.917406647326813	0	0
23057	NMNAT2	35.2815476190476	66.6197849462366	0.917036851035321	0	0
6051	RNPEP	10.2883333333333	19.4032258064516	0.915287231262092	0	0
151230	KLHL23	58.5963095238095	110.491075268817	0.915048133349065	0	0
4882	NPR2	4.65559523809524	8.77440860215054	0.91433625619167	0	0
84313	VPS25	57.2544047619048	107.901505376344	0.914256398901541	0	0
644353	ZCCHC18	11.6396428571429	21.9310752688172	0.913929756051658	0	0
55669	MFN1	4.91892857142857	9.26354838709677	0.913220815733574	0	0
54925	ZSCAN32	7.18678571428571	13.5334408602151	0.913110113828553	0	0
784	CACNB3	51.5807142857143	97.1078494623656	0.912756165293775	0	0
100507437	LOC100507437	6.71357142857143	12.6341935483871	0.912181230364121	0	0
101060200	ZNF891	6.75821428571429	12.7149462365591	0.911811361284239	0	0
57599	WDR48	49.705	93.508064516129	0.911699809425733	0	0
669	BPGM	42.06	79.1133333333333	0.911472009139465	0	0
7189	TRAF6	7.74607142857143	14.5648387096774	0.910953015218883	0	0
57449	PLEKHG5	11.8028571428571	22.1856989247312	0.910493865522524	0	0
100874375	FAM155A-IT1	7.02369047619048	13.1997849462366	0.910213251156697	0	0
119559	SFXN4	37.0017857142857	69.5164516129032	0.909759546126786	0	0
118980	SFXN2	4.06035714285714	7.62677419354839	0.909466356154634	0	0
51573	GDE1	36.197380952381	67.972688172043	0.909069863957158	0	0
91663	MYADM	7.21464285714286	13.542688172043	0.908514252225715	0	0
57192	MCOLN1	16.3403571428571	30.6691397849462	0.908348186053289	0	0
5566	PRKACA	18.465119047619	34.6562365591398	0.908312431885987	0	0
54849	DEF8	39.3894047619048	73.9195698924731	0.908148746686662	0	0
83752	LONP2	21.195119047619	39.7660215053763	0.907804161532092	0	0
51351	ZNF117	23.8747619047619	44.7832258064516	0.907472105843187	0	0
118812	MORN4	25.4338095238095	47.6888172043011	0.906903433131035	0	0
54850	FBXL12	19.7283333333333	36.9869892473118	0.906748788321796	0	0
5876	RABGGTB	18.4954761904762	34.6715053763441	0.906578032174813	0	0
101410538	MMP24-AS1	3.17619047619048	5.95290322580645	0.906296007666988	0	0
91875	TTC5	20.5178571428571	38.4509677419355	0.906139842991073	0	0
26953	RANBP6	21.6770238095238	40.6230107526882	0.906130475588929	0	0
51805	COQ3	29.4638095238095	55.207311827957	0.905915378956501	0	1
220965	FAM13C	10.9484523809524	20.5095698924731	0.905570285276224	0	0
9678	PHF14	115.128333333333	215.644731182796	0.905413539783957	0	0
26205	GMEB2	7.74630952380952	14.5055913978495	0.905028061659788	0	0
28986	MAGEH1	105.683095238095	197.884193548387	0.904911752574575	0	0
3475	IFRD1	32.0678571428571	60.0429032258064	0.904865784202093	0	0
25943	C20orf194	36.8032142857143	68.9060215053763	0.904798288966969	1	0
3780	KCNN1	14.3646428571429	26.8904301075269	0.904570706921844	0	0
29889	GNL2	26.022619047619	48.6663440860215	0.903158231056321	0	0
60492	CCDC90B	111.275	208.050752688172	0.902806006999021	0	0
374969	CCDC23	104.81	195.916344086021	0.902461385680927	0	0
10559	SLC35A1	24.2117857142857	45.2231182795699	0.901350986299892	0	0
100885848	PTGES3L	2.30666666666667	4.30698924731183	0.900870184658274	0	0
5214	PFKP	15.4539285714286	28.8320430107527	0.899699433536725	0	0
8508	NIPSNAP1	95.5519047619048	178.254516129032	0.899582090481255	0	0
55751	TMEM184C	5.96119047619048	11.1158064516129	0.898940242494159	0	0
255928	SYT14	4.66285714285714	8.69021505376344	0.898177649220314	0	0
57176	VARS2	18.3438095238095	34.1689247311828	0.897391568388893	0	0
4781	NFIB	1203.0069047619	2240.6076344086	0.897245109392863	1	0
142913	CFL1P1	5.20428571428571	9.6910752688172	0.896956580178403	0	0
4761	NEUROD2	192.2325	357.910430107527	0.896746319345666	0	0
5156	PDGFRA	2.07404761904762	3.86150537634409	0.896714361978473	0	0
54751	FBLIM1	4.18666666666667	7.7947311827957	0.89669721110398	0	0
2617	GARS	101.344761904762	188.679892473118	0.896669160062116	0	0
2975	GTF3C1	31.7416666666667	59.0784946236559	0.896255183259077	0	0
352954	GATS	24.3484523809524	45.3117204301075	0.89605419357797	0	0
125150	ZSWIM7	57.1492857142857	106.348494623656	0.895992239907373	0	0
23673	STX12	45.6438095238095	84.9108602150538	0.895529881375996	0	0
255919	CNEP1R1	9.35047619047619	17.3941935483871	0.895494048529974	0	0
54441	STAG3L1	2.86869047619048	5.33623655913978	0.895430309953134	0	0
4097	MAFG	16.8194047619048	31.2861290322581	0.895396518386997	0	0
1725	DHPS	57.4764285714286	106.897204301075	0.895181797971491	0	0
79770	TXNDC15	31.2869047619048	58.1862365591398	0.895118998021984	0	0
59307	SIGIRR	33.7154761904762	62.689247311828	0.894807033796842	0	0
23043	TNIK	21.032619047619	39.0244086021505	0.891748258794003	0	0
23148	NACAD	22.075119047619	40.9537634408602	0.891574816114232	0	0
7584	ZNF35	16.7465476190476	31.0681720430108	0.891573652422524	0	0
9890	LPPR4	5.16428571428571	9.58	0.891456835955305	0	0
64418	TMEM168	23.9622619047619	44.4466666666667	0.891311129420582	0	0
79813	EHMT1	50.5294047619048	93.7197849462366	0.891230458670279	0	0
3364	HUS1	23.2440476190476	43.0925806451613	0.89057818300371	0	0
4927	NUP88	13.4359523809524	24.9061290322581	0.890402224462509	0	0
79966	SCD5	61.2622619047619	113.409032258065	0.88846500596633	0	0
1272	CNTN1	22.3286904761905	41.3320430107527	0.888362033710228	0	0
55860	ACTR10	89.9414285714286	166.487741935484	0.888358255143398	0	0
201895	SMIM14	74.5725	138.031075268817	0.888277488017878	0	0
84912	SLC35B4	26.9911904761905	49.9379569892473	0.887648190543468	0	0
29062	WDR91	13.1977380952381	24.4152688172043	0.887492969095213	0	0
23270	TSPYL4	34.5383333333333	63.8735483870968	0.887020132736593	0	0
55032	SLC35A5	22.7019047619048	41.9766666666667	0.886774258635718	0	0
126272	EID2B	14.0761904761905	26.027311827957	0.886769372348942	0	0
1525	CXADR	162.975	301.165698924731	0.885906789294162	0	0
27020	NPTN	19.255119047619	35.528064516129	0.883717053401306	0	0
55007	FAM118A	10.8834523809524	20.0791397849462	0.883561191861226	0	0
92	ACVR2A	76.8190476190476	141.692903225806	0.883231518852428	0	0
131965	METTL6	22.2970238095238	41.0997849462366	0.882279691940518	0	0
84292	WDR83	6.60630952380952	12.1767741935484	0.882215522180396	0	0
3720	JARID2	39.2689285714286	72.3763440860215	0.882129999845816	1	0
80003	PCNXL2	21.3588095238095	39.3544086021505	0.88169402217323	0	0
41	ASIC1	37.0066666666667	68.184623655914	0.881661240764609	0	0
54888	NSUN2	10.5526190476191	19.442688172043	0.88162659676636	0	0
79891	ZNF671	18.0658333333333	33.2844086021505	0.881582730308606	0	0
25778	DSTYK	25.9890476190476	47.8806451612903	0.881538825275896	0	0
79670	ZCCHC6	24.234880952381	44.640752688172	0.881276357014092	0	0
728613	LOC728613	8.2252380952381	15.1382795698925	0.880071909588261	0	0
54494	C11orf71	21.6977380952381	39.9001075268817	0.878847979210326	0	0
2966	GTF2H2	4.61809523809524	8.49150537634409	0.878722411971553	0	0
84630	TTBK1	13.1120238095238	24.1066666666667	0.878541797755677	0	0
66000	TMEM108	20.2930952380952	37.2912903225806	0.8778497855853	0	0
114793	FMNL2	40.8210714285714	75.0097849462366	0.877764756699641	0	0
4774	NFIA	708.623452380952	1301.66591397849	0.877268095063607	0	0
51647	FAM96B	282.742976190476	519.327634408602	0.877153810311365	0	0
347735	SERINC2	48.5039285714286	89.0252688172043	0.876113283910048	0	0
143570	XRRA1	6.65297619047619	12.2058064516129	0.875495843025128	0	0
55239	OGFOD1	14.5402380952381	26.6738709677419	0.875376313525973	0	0
147929	ZNF565	8.9402380952381	16.3931182795699	0.874705149589337	0	0
29082	CHMP4A	49.0092857142857	89.8638709677419	0.874686088251617	0	0
7473	WNT3	5.91261904761905	10.8390322580645	0.874366722419823	0	0
256471	MFSD8	10.1646428571429	18.6243010752688	0.873626759925013	0	0
29078	NDUFAF4	63.2313095238095	115.853333333333	0.873588550811318	0	0
1496	CTNNA2	33.1227380952381	60.6458064516129	0.872585950698005	0	0
8898	MTMR2	15.3595238095238	28.1202150537634	0.872474138732674	0	0
79155	TNIP2	8.36345238095238	15.3098924731183	0.872293644427755	0	0
401431	ATP6V0E2-AS1	6.4452380952381	11.7978494623656	0.872218346304042	0	0
144245	ALG10B	8.84678571428571	16.1925806451613	0.872107645383591	0	0
5947	RBP1	544.698214285714	996.838817204301	0.871903110916774	0	0
54521	WDR44	9.81392857142857	17.9561290322581	0.871573692359958	0	0
476	ATP1A1	20.6294047619048	37.7410752688172	0.871433332389011	1	0
7746	ZSCAN9	20.6264285714286	37.7339784946237	0.871370176373762	0	0
253959	RALGAPA1	6.65202380952381	12.1672043010753	0.871132475729616	0	1
6415	SEPW1	364.69380952381	666.921935483871	0.870832190088346	0	0
5575	PRKAR1B	29.7757142857143	54.415376344086	0.869878259364105	1	0
80315	CPEB4	32.1902380952381	58.8224731182796	0.869744194077156	0	0
83698	CALN1	2.53107142857143	4.62483870967742	0.869654830939527	0	0
728743	LOC728743	8.5697619047619	15.6543010752688	0.869232069898821	0	0
51645	PPIL1	51.0653571428571	93.2756989247312	0.86915637002521	0	0
256435	ST6GALNAC3	17.2485714285714	31.505376344086	0.869121164221184	0	0
9716	AQR	15.7157142857143	28.7045161290323	0.869069891644031	0	0
55558	PLXNA3	34.8804761904762	63.6738709677419	0.868281737587854	1	0
54165	DCUN1D1	30.7260714285714	56.0778494623656	0.867967705544344	0	0
2036	EPB41L1	16.0609523809524	29.3124731182796	0.867957250373479	0	0
388695	LYSMD1	6.80892857142857	12.4236559139785	0.867590074563584	0	0
124401	ANKS3	11.2569047619048	20.5366666666667	0.867391841484588	0	0
146330	FBXL16	12.5447619047619	22.881935483871	0.867123999451499	0	0
127396	ZNF684	6.99678571428571	12.7604301075269	0.866912744887505	0	0
80208	SPG11	16.1891666666667	29.5196774193548	0.866648231037985	0	0
57117	INTS12	31.1130952380952	56.6845161290323	0.865432777929117	0	0
5599	MAPK8	32.6254761904762	59.4236559139785	0.865038407718438	0	0
7625	ZNF74	19.7263095238095	35.9063440860215	0.864117691884775	0	0
8743	TNFSF10	1.91583333333333	3.48623655913979	0.863698406865709	0	0
873	CBR1	28.1442857142857	51.2102150537634	0.863589583694206	0	0
2861	GPR37	4.57392857142857	8.31741935483871	0.86270213676148	0	0
10550	ARL6IP5	85.7285714285714	155.830537634409	0.862129973843146	0	0
1687	DFNA5	19.5664285714286	35.5649462365591	0.862075535422777	0	0
84224	NBPF3	3.56857142857143	6.48516129032258	0.861795805943426	0	0
7259	TSPYL1	56.9705952380952	103.455483870968	0.860720735332722	0	0
219402	MTIF3	50.5610714285714	91.7910752688172	0.860326853354506	0	0
91369	ANKRD40	17.5767857142857	31.9018279569892	0.859967824574348	0	0
2819	GPD1	5.29083333333333	9.60268817204301	0.859943357659419	0	0
79643	CHMP6	16.1182142857143	29.2368817204301	0.859097529306266	0	0
84461	NEURL4	7.17333333333333	13.0052688172043	0.858380642733392	0	0
80209	PROSER1	20.127380952381	36.4521505376344	0.856844474784723	0	0
285175	UNC80	15.4757142857143	28.0270967741935	0.856816309587252	1	0
63979	FIGNL1	18.347380952381	33.2051612903226	0.855833370034045	0	0
3981	LIG4	7.68452380952381	13.907311827957	0.855815817784371	0	0
65055	REEP1	59.6354761904762	107.913870967742	0.855637589635613	0	0
5289	PIK3C3	16.4925	29.8412903225806	0.85549981344525	0	0
9379	NRXN2	44.3652380952381	80.260752688172	0.855264974792722	0	0
54870	QRICH1	26.6157142857143	48.1454838709677	0.855122192765607	1	0
25864	ABHD14A	54.4705952380952	98.5268817204301	0.855039765410405	0	0
348094	ANKDD1A	12.3030952380952	22.2538709677419	0.855034991248326	0	0
136051	ZNF786	6.93166666666667	12.5362365591398	0.854830124613259	0	0
84269	CHCHD5	47.0708333333333	85.1294623655914	0.85482512467362	0	0
493861	EID3	6.57880952380952	11.8976344086022	0.854776304722424	0	0
66036	MTMR9	35.5042857142857	64.1879569892473	0.854309460283755	0	0
55117	SLC6A15	25.6191666666667	46.3125806451613	0.854180600770532	0	0
7627	ZNF75A	9.82833333333333	17.7659139784946	0.854093217483385	0	0
10244	RABEPK	39.5922619047619	71.5527956989247	0.853789645945862	0	0
56884	FSTL5	47.6041666666667	86.0022580645161	0.853286685195404	0	0
26272	FBXO4	3.7697619047619	6.80720430107527	0.852589002364107	0	0
129831	RBM45	11.4490476190476	20.6739784946237	0.852588453565763	0	0
8507	ENC1	171.195476190476	309.120322580645	0.852523925515822	0	0
5861	RAB1A	186.547976190476	336.648494623656	0.851696304783262	0	0
60560	NAA35	31.132619047619	56.1797849462366	0.85162415252515	0	0
533	ATP6V0B	221.337380952381	399.332688172043	0.8513440476766	0	0
27040	LAT	7.23666666666667	13.0561290322581	0.851329995253793	0	0
256281	NUDT14	28.157619047619	50.7967741935484	0.851211535067015	0	0
53349	ZFYVE1	14.5678571428571	26.2691397849462	0.850580278474374	0	0
128434	VSTM2L	37.66	67.891935483871	0.850207214747513	0	0
6391	SDHC	47.2716666666667	85.1832258064516	0.849593633407188	0	0
54902	TTC19	42.4458333333333	76.4798924731183	0.849457555422374	0	0
6280	S100A9	2.18940476190476	3.94129032258065	0.848129330330673	0	0
6604	SMARCD3	43.5158333333333	78.3160215053763	0.847767052843165	0	0
7321	UBE2D1	66.5138095238095	119.700322580645	0.847701232629605	0	0
79646	PANK3	11.140119047619	20.0468817204301	0.847613193887973	0	0
84303	CHCHD6	49.4128571428571	88.9093548387097	0.847448746615081	0	0
51104	ABHD17B	19.1891666666667	34.5227956989247	0.847257239915389	0	0
221692	PHACTR1	4.36369047619048	7.84849462365591	0.846867192645746	0	0
79874	RABEP2	6.31642857142857	11.3590322580645	0.84665896161783	0	0
90141	EFCAB11	6.19297619047619	11.1369892473118	0.846654465335891	0	0
85446	ZFHX2	12.245	22.0156989247312	0.846339871837274	0	0
90134	KCNH7	14.7244047619048	26.4551612903226	0.84533989962075	0	0
2321	FLT1	4.34630952380952	7.80365591397849	0.844359246541771	0	0
6695	SPOCK1	32.4259523809524	58.197311827957	0.843803567221525	0	0
4494	MT1F	39.1272619047619	70.2003225806452	0.84330350483912	0	0
5884	RAD17	30.9110714285714	55.4548387096774	0.843189686930312	0	0
1174	AP1S1	10.0660714285714	18.0478494623656	0.842326199029581	0	0
79868	ALG13	26.6363095238095	47.7387096774194	0.841765362536738	0	2+
54065	SMIM11	23.0091666666667	41.2216129032258	0.841192221418316	0	0
5290	PIK3CA	9.42964285714286	16.8908602150538	0.840967767637271	0	0
9168	TMSB10	5318.0505952381	9525.17849462366	0.840848624997707	0	0
219931	TPCN2	2.38595238095238	4.27247311827957	0.840506164836673	0	1
51566	ARMCX3	51.525	92.2363440860215	0.840062731162125	0	0
8449	DHX16	16.8439285714286	30.1381720430108	0.839363253733835	0	0
5110	PCMT1	136.800238095238	244.726774193548	0.839101206104522	0	0
310	ANXA7	18.440119047619	32.9836559139785	0.838903346503085	0	0
83874	TBC1D10A	9.45630952380952	16.9082795698925	0.838380708237272	0	0
9839	ZEB2	163.128452380952	291.569462365591	0.837831191795918	0	0
339416	ANKRD45	4.01285714285714	7.17032258064516	0.83740822749482	0	0
54995	OXSM	13.8816666666667	24.7968817204301	0.836977917154734	0	0
2561	GABRB2	8.78202380952381	15.6809677419355	0.836389246330025	0	0
586	BCAT1	18.0853571428571	32.2906451612903	0.836294177951487	0	0
649	BMP1	11.7772619047619	21.021935483871	0.835891337925391	0	0
1876	E2F6	16.4144047619048	29.2947311827957	0.83567877721959	0	0
23438	HARS2	17.0510714285714	30.4295698924731	0.83561154627356	0	0
4661	MYT1	64.4555952380952	114.998064516129	0.835232073895758	0	0
5423	POLB	68.8992857142857	122.868064516129	0.834549052084067	0	0
4601	MXI1	46.2341666666667	82.3427956989247	0.832683046338987	0	0
401588	ZNF674-AS1	12.0830952380952	21.5152688172043	0.832370799157316	0	0
90362	FAM110B	59.0291666666667	105.106451612903	0.83235134703357	0	0
51479	ANKFY1	16.6021428571429	29.555376344086	0.832051127444753	0	0
23517	SKIV2L2	23.4585714285714	41.7563440860215	0.831880245108933	0	0
55127	HEATR1	7.32571428571429	13.0369892473118	0.831569393206162	1	0
58509	CACTIN	11.2785714285714	20.0693548387097	0.831409895694325	0	0
10497	UNC13B	19.294880952381	34.3323655913978	0.831351123636866	0	0
120534	ARL14EP	60.9796428571429	108.502258064516	0.831325461255138	0	0
26284	ERAL1	46.7109523809524	83.1034408602151	0.831147352085212	0	0
79921	TCEAL4	185.71130952381	330.292150537634	0.830681008294622	0	0
9108	MTMR7	7.88154761904762	14.0172043010753	0.830647785947255	0	0
81631	MAP1LC3B	125.165595238095	222.578172043011	0.830474058883314	0	0
137492	VPS37A	21.0610714285714	37.4472043010753	0.830279183625152	0	0
84315	MON1A	18.2182142857143	32.3852688172043	0.829956163487758	0	0
203054	ADCK5	7.68642857142857	13.6632258064516	0.829912811612908	0	0
80023	NRSN2	24.5252380952381	43.5860215053763	0.829598379292381	0	0
10391	CORO2B	73.5161904761905	130.625698924731	0.829304841594674	1	0
7070	THY1	70.8713095238095	125.890537634409	0.828896237436344	0	0
2882	GPX7	23.5108333333333	41.7611827956989	0.828836897998545	0	0
10929	SRSF8	23.4320238095238	41.6063440860215	0.828321961300614	0	0
51068	NMD3	24.854880952381	44.1256989247312	0.82808993678379	0	0
100507321	ERVK13-1	6.55428571428571	11.632688172043	0.827674055231011	0	0
157567	ANKRD46	35.0675	62.2263440860215	0.827390904718924	0	0
415116	PIM3	18.6946428571429	33.1578494623656	0.826725529986867	0	0
84258	SYT3	15.4142857142857	27.331935483871	0.826319588839632	0	0
30811	HUNK	26.7054761904762	47.347311827957	0.826146908710254	0	0
2182	ACSL4	20.2015476190476	35.8020430107527	0.825576095366684	0	0
3295	HSD17B4	29.7766666666667	52.7244086021505	0.824288746504239	0	0
192286	HIGD2A	145.345714285714	257.341290322581	0.824194423279651	0	0
29114	TAGLN3	374.52880952381	662.970322580645	0.823867592500278	0	0
4698	NDUFA5	213.066785714286	377.108172043011	0.823672700809096	0	0
347733	TUBB2B	1716.29785714286	3037.14279569892	0.823414791559682	0	0
57515	SERINC1	136.240595238095	241.084946236559	0.82338492605616	0	0
23331	TTC28	69.8910714285714	123.656774193548	0.82316120748033	0	0
55615	PRR5	4.39261904761905	7.77086021505376	0.822992923945346	0	0
9445	ITM2B	143.309880952381	253.415376344086	0.822365980544846	0	0
160	AP2A1	3.79702380952381	6.71043010752688	0.821536193953839	0	0
253980	KCTD13	17.874880952381	31.5801075268817	0.82108244992806	0	0
23554	TSPAN12	5.75583333333333	10.168064516129	0.820948366422093	0	0
6567	SLC16A2	15.400119047619	27.1876344086022	0.820009124739751	0	0
439	ASNA1	73.6339285714286	129.978279569892	0.81982797689115	0	0
84078	KBTBD7	12.1411904761905	21.4261290322581	0.819461339334449	0	0
155400	NSUN5P1	10.4852380952381	18.5031182795699	0.819408802616354	0	0
56938	ARNTL2	2.54702380952381	4.49462365591398	0.819387875015485	0	0
2977	GUCY1A2	43.5951190476191	76.9267741935484	0.819319193917378	0	0
7347	UCHL3	39.6361904761905	69.9337634408602	0.819170836482303	0	0
7732	RNF112	17.0820238095238	30.1376344086021	0.819087270216526	0	0
27248	ERLEC1	36.5854761904762	64.5372043010753	0.818860045952557	0	0
84668	FAM126A	30.4819047619048	53.754623655914	0.818435794979162	0	0
4702	NDUFA8	140.814523809524	248.272043010753	0.818125670890048	0	0
9409	PEX16	22.3852380952381	39.4518279569892	0.817544484268607	0	0
11332	ACOT7	148.645476190476	261.924301075269	0.817274360122311	0	0
90701	SEC11C	143.225238095238	252.355698924731	0.817172931164837	0	0
6834	SURF1	19.7891666666667	34.8434408602151	0.816176239087071	0	0
3620	IDO1	17.3141666666667	30.4748387096774	0.815665633210042	0	0
7430	EZR	370.522023809524	651.747096774194	0.814752952452602	1	0
728568	C12orf73	46.1877380952381	81.2122580645161	0.814187605924351	0	0
112812	FDX1L	27.42	48.2022580645161	0.813872160860375	0	0
5558	PRIM2	5.05095238095238	8.87763440860215	0.813619857527646	0	0
2987	GUK1	119.982738095238	210.765483870968	0.812811762177975	0	0
93611	FBXO44	16.4570238095238	28.9062365591398	0.812677336280023	0	0
56900	TMEM167B	9.87369047619048	17.3316129032258	0.811744595082711	0	0
112611	RWDD2A	8.6627380952381	15.2	0.811176318307965	0	0
84925	DIRC2	7.13333333333333	12.5134408602151	0.810830250545502	0	0
79133	NDUFAF5	20.7169047619048	36.3401075268817	0.810754217117054	0	0
401115	C4orf48	863.148214285714	1513.61086021505	0.810314129073138	0	0
5298	PI4KB	24.8602380952381	43.578064516129	0.809762008109761	0	0
5297	PI4KA	28.7313095238095	50.351935483871	0.809423485284926	0	0
100289274	DNAJC3-AS1	6.60464285714286	11.574623655914	0.80941282995765	0	0
57690	TNRC6C	43.9805952380952	77.0603225806452	0.809121095331898	0	0
7466	WFS1	8.18428571428571	14.3387096774194	0.808986787843031	0	0
23061	TBC1D9B	16.5747619047619	28.9888172043011	0.80650832377839	0	0
10014	HDAC5	64.949880952381	113.575698924731	0.806255397061018	0	0
55577	NAGK	73.5994047619048	128.670107526882	0.8059109238485	0	0
9362	CPNE6	19.5278571428571	34.137311827957	0.80581581042079	0	0
10725	NFAT5	41.4236904761905	72.4040860215054	0.805615025681571	0	0
55898	UNC45A	16.3965476190476	28.6590322580645	0.805597814667142	0	0
56907	SPIRE1	55.8730952380952	97.579247311828	0.804420610502582	0	0
116138	KLHDC3	96.0916666666667	167.762365591398	0.803935882853255	0	0
1362	CPD	15.4294047619048	26.9269892473118	0.803370522201462	1	0
320	APBA1	9.45690476190476	16.501935483871	0.803195272745887	0	0
400927	LOC400927	6.39119047619048	11.1504301075269	0.802942770881981	0	0
28962	OSTM1	13.5314285714286	23.6004301075269	0.802498993404201	0	0
79095	C9orf16	211.448571428571	368.773655913978	0.802428784251216	0	0
9118	INA	68.7191666666667	119.789247311828	0.80171396611383	0	0
57216	VANGL2	49.0309523809524	85.4451612903226	0.801306010321312	0	0
80324	PUS1	5.20845238095238	9.07268817204301	0.800675314773374	0	0
7447	VSNL1	4.62333333333333	8.05344086021505	0.800671929517628	0	0
9240	PNMA1	123.7175	215.46	0.800370473012709	0	0
1397	CRIP2	377.227023809524	656.844408602151	0.800118638021936	0	0
51606	ATP6V1H	46.3413095238095	80.6786021505376	0.799887275018203	0	0
152002	XXYLT1	11.9088095238095	20.7320430107527	0.799833091916415	0	0
50512	PODXL2	23.7186904761905	41.2854838709677	0.799610253898397	0	0
8522	GAS7	20.1038095238095	34.9789247311828	0.799017033416234	0	0
7074	TIAM1	10.6432142857143	18.5156989247312	0.798815093642108	0	0
55788	LMBRD1	24.982380952381	43.4330107526882	0.797880983165623	0	0
27314	RAB30	23.67	41.1477419354839	0.797753555975003	0	0
114883	OSBPL9	33.4580952380952	58.1510752688172	0.797450553344833	0	0
9627	SNCAIP	41.6132142857143	72.3197849462366	0.797348658427346	0	0
55680	RUFY2	50.9753571428571	88.5617204301075	0.79688327060858	0	0
605	BCL7A	184.040357142857	319.683655913978	0.796622825845977	0	0
39	ACAT2	26.9366666666667	46.7812903225806	0.796360322111236	0	0
11237	RNF24	108.564880952381	188.432903225806	0.795493414012457	0	0
54958	TMEM160	87.2492857142857	151.421827956989	0.795357964034517	0	0
80314	EPC1	68.0196428571429	118.039247311828	0.795243290247	0	0
833	CARS	33.5016666666667	58.1156989247312	0.794695065082296	0	0
84186	ZCCHC7	18.3644047619048	31.8483870967742	0.794308176352971	0	0
80013	FAM188A	17.7557142857143	30.7840860215054	0.793901336640187	0	0
84548	TMEM185A	11.5565476190476	20.0360215053763	0.79388559096296	0	0
114783	LMTK3	1.89357142857143	3.28172043010753	0.793342497804208	2	0
6301	SARS	202.099047619048	350.185376344086	0.793056315325856	0	0
389073	C2orf80	7.09678571428571	12.2941935483871	0.792739452529228	0	0
8859	STK19	3.58238095238095	6.20505376344086	0.792524948109502	0	0
22902	RUFY3	153.372261904762	265.652258064516	0.792501387635725	0	0
1028	CDKN1C	17.8627380952381	30.9309677419355	0.792098730596741	0	0
728673	LOC728673	3.74380952380952	6.48247311827957	0.79203728260786	0	0
8492	PRSS12	2.98095238095238	5.1610752688172	0.791898341688246	0	0
23475	QPRT	3.22261904761905	5.57881720430108	0.791725626220767	0	0
3856	KRT8	6.64547619047619	11.5032258064516	0.791594000904375	0	0
89845	ABCC10	2.8722619047619	4.97032258064516	0.791152181601066	0	0
1445	CSK	24.1216666666667	41.7360215053763	0.790963489351889	0	0
10213	PSMD14	228.833214285714	395.738924731183	0.790252506121856	0	0
51088	KLHL5	34.8954761904762	60.2603225806452	0.788168376644462	0	0
7379	UPK2	3.82142857142857	6.59602150537634	0.787484038138512	0	0
25793	FBXO7	45.0635714285714	77.725376344086	0.786424040886461	0	0
84193	SETD3	15.4679761904762	26.6748387096774	0.786195098945721	0	0
23325	KIAA1033	23.7272619047619	40.9168817204301	0.786150576340645	0	0
54455	FBXO42	19.3327380952381	33.3377419354839	0.786110408718663	0	0
51163	DBR1	17.0529761904762	29.4035483870968	0.785966719128651	0	0
374655	ZNF710	6.18202380952381	10.657311827957	0.785692466683837	0	0
79912	PYROXD1	4.53154761904762	7.80516129032258	0.784424599989607	0	0
23051	ZHX3	13.2133333333333	22.7555913978495	0.784226619368057	0	0
55054	ATG16L1	10.0460714285714	17.2940860215054	0.783647332591765	0	0
201163	FLCN	6.35690476190476	10.9394623655914	0.783145457221232	0	0
143244	EIF5AL1	4.76892857142857	8.19967741935484	0.781901979944354	0	0
9296	ATP6V1F	398.293452380952	684.509032258065	0.781237815141078	0	0
57109	REXO4	15.1116666666667	25.9647311827957	0.780890504835448	0	0
10160	FARP1	50.1209523809524	86.1144086021505	0.78084082002542	1	0
92259	MRPS36	70.4402380952381	121.004086021505	0.780584073970939	0	0
284716	RIMKLA	9.02345238095238	15.4941935483871	0.77997624594503	0	0
4320	MMP11	11.022619047619	18.9213978494624	0.779551615508681	0	0
5270	SERPINE2	21.0658333333333	36.1503225806452	0.779103532933802	0	0
29915	HCFC2	10.8815476190476	18.6730107526882	0.779070802729447	0	0
55653	BCAS4	8.48285714285714	14.550752688172	0.778471612203821	0	0
80007	C10orf88	16.5754761904762	28.415376344086	0.777621505555532	0	0
54874	FNBP1L	171.490357142857	293.871720430108	0.777059077359979	0	0
8031	NCOA4	51.6411904761905	88.4930107526882	0.777041255261756	0	0
2254	FGF9	8.7375	14.9702150537634	0.77680249089712	0	0
10208	USPL1	15.5167857142857	26.5820430107527	0.776622254073237	0	0
54826	GIN1	9.90869047619048	16.9734408602151	0.776512748215586	0	0
345757	FAM174A	14.2619047619048	24.4064516129032	0.775095885765108	0	0
56954	NIT2	16.0266666666667	27.4224731182796	0.77488429229478	0	0
23646	PLD3	150.131666666667	256.866989247312	0.774793186154265	0	0
1826	DSCAM	2.8747619047619	4.91623655913979	0.774111863624407	2	0
129138	ANKRD54	13.6855952380952	23.4022580645161	0.77398955666575	0	0
79712	GTDC1	23.8680952380952	40.8027956989247	0.773584566570624	0	0
81619	TSPAN14	47.8985714285714	81.8748387096774	0.773437531157965	0	0
100131551	LINC00887	1.70678571428571	2.91709677419355	0.773251307780552	0	0
8872	CDC123	98.8007142857143	168.86	0.773234242211306	0	0
441151	TMEM151B	28.5904761904762	48.8377419354839	0.772461848273063	0	0
740	MRPL49	17.1338095238095	29.2674193548387	0.772449586910467	0	0
79969	ATAT1	180.845833333333	308.870537634409	0.772241903708827	0	0
100133941	CD24	242.766428571429	414.55	0.771977190085689	0	0
8487	GEMIN2	20.3375	34.724623655914	0.771816712522291	0	0
9253	NUMBL	20.6653571428571	35.2843010752688	0.771812135953435	0	0
7694	ZNF135	22.8561904761905	39.0122580645161	0.771342540866574	0	0
23373	CRTC1	24.3822619047619	41.6112903225806	0.771143056784087	0	0
84888	SPPL2A	8.42226190476191	14.3731182795699	0.771093447201505	0	0
55602	CDKN2AIP	19.857619047619	33.8690322580645	0.770274112840024	0	0
54920	DUS2	7.95619047619048	13.57	0.770271000034821	0	0
5453	POU3F1	4.54559523809524	7.75064516129032	0.769847179578468	0	0
79016	DDA1	60.5661904761905	103.173333333333	0.768485557200201	0	0
80055	PGAP1	97.730119047619	166.458494623656	0.768287341076967	0	0
729013	ZBED5-AS1	3.83404761904762	6.53021505376344	0.768262248090436	0	0
79089	TMUB2	22.555	38.4037634408602	0.767800411124079	0	0
27289	RND1	7.13357142857143	12.144623655914	0.767621334520064	0	0
23380	SRGAP2	36.8498809523809	62.7329032258065	0.767562372360457	1	0
147525	LINC00526	20.5520238095238	34.9867741935484	0.767529186445137	0	0
516	ATP5G1	267.318571428571	455.033010752688	0.767411141188937	0	0
340252	ZNF680	9.69595238095238	16.4827956989247	0.765506444793831	0	0
79137	FAM134A	22.092619047619	37.5330107526882	0.764595564057751	0	1
57132	CHMP1B	56.7602380952381	96.4123655913978	0.764337553356478	0	0
5469	MED1	46.515	79.0022580645161	0.764197862718337	0	0
2774	GNAL	4.06559523809524	6.90408602150538	0.763983849176	0	0
148254	ZNF555	11.4541666666667	19.4474193548387	0.763706223295184	0	0
2280	FKBP1A	287.29880952381	487.576666666667	0.763077071590612	0	0
51008	ASCC1	24.630119047619	41.795376344086	0.762919750531312	0	0
170959	ZNF431	20.942619047619	35.5289247311828	0.762552152245467	0	0
280	AMY2B	4.74369047619048	8.04645161290323	0.762342834826229	0	0
23759	PPIL2	8.12202380952381	13.7688172043011	0.761493469994059	0	0
5877	RABIF	35.0219047619048	59.3369892473118	0.76067417566446	0	0
7109	TRAPPC10	5.65857142857143	9.58655913978495	0.760575214087154	0	0
80742	PRR3	19.322619047619	32.7158064516129	0.759697179098235	0	0
23426	GRIP1	24.8821428571429	42.1288172043011	0.759696675685408	0	0
23360	FNBP4	65.1682142857143	110.311075268817	0.7593372768301	0	0
7182	NR2C2	5.06511904761905	8.57344086021505	0.759278153330512	0	0
2738	GLI4	4.70845238095238	7.96935483870968	0.759209996189677	0	0
152217	NCBP2-AS2	118.322023809524	200.249247311828	0.759078185926831	0	0
130507	UBR3	19.975	33.800752688172	0.758859870200431	1	0
374882	TMEM205	77.7059523809524	131.456021505376	0.758483207529102	0	0
3925	STMN1	3393.5519047619	5739.34752688172	0.758090655117006	0	0
26012	NSMF	91.4119047619048	154.592903225806	0.758020124324091	0	0
202559	KHDRBS2	23.8155952380952	40.2725806451613	0.757891315029078	0	0
9061	PAPSS1	72.932619047619	123.163978494624	0.755944267743112	0	0
10313	RTN3	389.932261904762	658.337634408602	0.755604148727786	0	0
56902	PNO1	22.8552380952381	38.5720430107527	0.755030713576652	0	0
83480	PUS3	13.5605952380952	22.8849462365591	0.754978396116741	0	0
57662	CAMSAP3	14.075119047619	23.7483870967742	0.754682409523832	0	0
7158	TP53BP1	48.3440476190476	81.5438709677419	0.754238176394013	0	0
100287846	LOC100287846	9.15571428571429	15.4425806451613	0.754169517039362	0	0
123720	WHAMM	7.475	12.6048387096774	0.753832173302044	0	0
146540	ZNF785	8.85214285714286	14.9254838709677	0.753679064286087	0	0
55145	THAP1	13.7442857142857	23.1735483870968	0.753647037461513	0	0
9960	USP3	103.147380952381	173.904731182796	0.753589992799084	0	0
9519	TBPL1	46.6291666666667	78.6058064516129	0.753403238600699	0	0
55333	SYNJ2BP	56.1736904761905	94.6739784946237	0.753073362303257	0	0
150223	YDJC	10.7190476190476	18.0627956989247	0.752844476699102	0	0
2060	EPS15	22.6971428571429	38.2463440860215	0.752811148407234	0	0
7562	ZNF708	16.865	28.4181720430108	0.752781439979124	0	0
54839	LRRC49	39.1097619047619	65.8803225806452	0.752318866031929	0	0
4301	MLLT4	256.011547619048	431.248172043011	0.752309455872491	0	0
4756	NEO1	25.1159523809524	42.3059139784946	0.752255370842477	0	0
89927	C16orf45	139.157023809524	234.371075268817	0.752080802540285	0	0
646450	ARIH2OS	13.3678571428571	22.4993548387097	0.751115412181852	0	0
54934	KANSL2	37.6709523809524	63.4	0.751030333017563	0	0
55324	ABCF3	19.4070238095238	32.6595698924731	0.750926903012158	0	0
28511	NKIRAS2	78.4747619047619	132.040107526882	0.750675566794249	0	0
6876	TAGLN	3.0672619047619	5.16021505376344	0.750479832233896	0	0
4968	OGG1	33.6398809523809	56.5920430107527	0.750426620548073	0	0
146713	RBFOX3	21.6404761904762	36.4034408602151	0.750342575209466	0	0
286097	MICU3	22.4971428571429	37.8367741935484	0.750047305284754	0	0
10982	MAPRE2	85.8359523809524	144.350860215054	0.749925752790875	0	0
2960	GTF2E1	10.2873809523809	17.2982795698925	0.749752823693995	0	0
6546	SLC8A1	18.1713095238095	30.5540860215054	0.749702933864361	0	1
6996	TDG	225.254285714286	378.734838709677	0.749633581438236	0	0
51246	SHISA5	73.0365476190476	122.77064516129	0.749275172150409	0	0
27352	SGSM3	24.6264285714286	41.3743010752688	0.7485275237885	0	0
56475	RPRM	8.93345238095238	15.0025806451613	0.747920959457047	0	0
9528	TMEM59	199.100476190476	334.337096774194	0.747806768228178	0	0
23062	GGA2	13.9271428571429	23.3822580645161	0.747514939622667	0	0
782	CACNB1	15.4795238095238	25.988064516129	0.747488100726675	0	0
56851	EMC7	55.8639285714286	93.7705376344086	0.747217671163375	0	0
129563	DIS3L2	18.5386904761905	31.1161290322581	0.747123255179998	0	0
25988	HINFP	21.365119047619	35.8551612903226	0.746923451589257	0	0
2902	GRIN1	1.90142857142857	3.1894623655914	0.746229511300914	0	2+
7988	ZNF212	10.6202380952381	17.8115053763441	0.745993343657068	0	0
64061	TSPYL2	9.70916666666667	16.2834408602151	0.745986208052623	0	0
23564	DDAH2	461.203333333333	773.41064516129	0.745831681631984	0	0
92126	DSEL	7.36785714285714	12.3486021505376	0.745030745356967	0	0
54187	NANS	32.7565476190476	54.8970967741935	0.744946542564663	0	0
6251	RSU1	69.5386904761905	116.531397849462	0.744830918223841	0	0
440823	MIAT	129.040952380952	216.164408602151	0.744300011976606	1	0
147166	TRIM16L	8.24869047619048	13.8169892473118	0.744206276431788	0	0
9537	TP53I11	62.4592857142857	104.579462365591	0.743611582665567	0	0
6712	SPTBN2	20.5435714285714	34.39	0.74330210488083	0	0
80210	ARMC9	16.9994047619048	28.4556989247312	0.743233384224777	0	0
8831	SYNGAP1	6.36202380952381	10.6489247311828	0.743150086327985	3+	0
145407	C14orf37	35.9761904761905	60.2035483870968	0.742806094197253	0	0
23097	CDK19	29.8308333333333	49.9041935483871	0.742356772825434	0	0
5602	MAPK10	32.9910714285714	55.1870967741935	0.742255359626187	0	0
57827	C6orf47	6.41452380952381	10.7159139784946	0.740340831102113	0	0
27243	CHMP2A	138.65619047619	231.626021505376	0.740285310057241	0	0
57291	DANCR	126.927857142857	211.850215053763	0.739035857751712	0	0
51291	GMIP	8.72619047619048	14.5589247311828	0.738479936835753	0	0
81573	ANKRD13C	21.4955952380952	35.8390322580645	0.737490620828171	0	0
10652	YKT6	31.8688095238095	53.1331182795699	0.737466256778938	0	0
10952	SEC61B	303.541428571429	505.825806451613	0.736747208133072	0	0
23355	VPS8	15.9646428571429	26.6025806451613	0.736685925566244	0	0
54901	CDKAL1	61.8622619047619	102.998064516129	0.735485737742578	0	0
2890	GRIA1	79.1401190476191	131.696451612903	0.734735333985187	0	0
54463	FAM134B	4.71630952380952	7.84720430107527	0.734520357911712	0	0
10505	SEMA4F	5.44940476190476	9.06462365591398	0.734148470534147	0	0
83877	TM2D2	38.0891666666667	63.3524731182796	0.734020215322464	0	0
7581	ZNF33A	48.0813095238095	79.9697849462366	0.733978818958116	0	0
130535	KCTD18	6.02	10.0089247311828	0.733451600226615	0	0
9131	AIFM1	26.782380952381	44.5191397849462	0.733141494786101	0	0
112936	VPS26B	48.6196428571429	80.8178494623656	0.733134666496036	0	0
51429	SNX9	4.7375	7.87451612903226	0.733065332636149	0	0
51147	ING4	94.2055952380952	156.529032258065	0.732545611382373	0	0
1781	DYNC1I2	362.838095238095	602.683225806452	0.732073975694829	0	0
6598	SMARCB1	83.7754761904762	139.139569892473	0.731932879145027	0	0
163051	ZNF709	11.3853571428571	18.9091397849462	0.731904186135935	0	0
79096	C11orf49	97.7997619047619	162.417096774194	0.731800647235851	0	0
641977	SEPT7P2	25.5010714285714	42.3448387096774	0.731628271084228	0	0
25940	FAM98A	28.2520238095238	46.9086021505376	0.731498292536036	0	0
79862	ZNF669	8.65178571428571	14.3640860215054	0.731396359468796	0	0
781	CACNA2D1	44.9407142857143	74.6077419354839	0.731302289756896	0	0
9874	TLK1	28.1320238095238	46.7001075268817	0.731212528297337	0	0
211	ALAS1	42.7302380952381	70.9137634408602	0.730808307201662	0	0
22931	RAB18	73.1135714285714	121.32	0.730606272148168	0	0
146664	MGAT5B	4.4497619047619	7.38290322580645	0.730460104702787	0	0
9885	OSBPL2	33.6635714285714	55.8506451612903	0.730385703275068	0	0
10452	TOMM40	37.4504761904762	62.1310752688172	0.73033095947251	0	0
637	BID	57.1821428571429	94.8418279569892	0.729958784343756	0	0
23530	NNT	29.5611904761905	49.0120430107527	0.729431914808319	0	0
29843	SENP1	15.245	25.2748387096774	0.729365735312142	0	0
6293	VPS52	14.7671428571429	24.4811827956989	0.729282541928872	0	0
4758	NEU1	21.3167857142857	35.3350537634409	0.729110188700607	0	0
79725	THAP9	5.70166666666667	9.44967741935484	0.728881383078587	0	0
2664	GDI1	293.734285714286	486.752903225806	0.728677911884387	0	0
59274	MESDC1	14.2780952380952	23.6569892473118	0.728462947755262	0	0
6399	TRAPPC2	33.7155952380952	55.8447311827957	0.728005104080519	0	0
29789	OLA1	109.452023809524	181.250860215054	0.727689211417142	0	0
7770	ZNF227	12.7141666666667	21.0543010752688	0.727678078598073	0	0
83862	TMEM120A	29.0677380952381	48.1311827956989	0.727553064535595	0	0
9863	MAGI2	34.0311904761905	56.3406451612903	0.727318463805143	0	0
91893	FDXACB1	7.88083333333333	13.0466666666667	0.72726115924352	0	0
6785	ELOVL4	29.4714285714286	48.7710752688172	0.726708786150037	0	0
51026	GOLT1B	27.8070238095238	46.0132258064516	0.726599260614495	0	0
51263	MRPL30	41.3192857142857	68.3610752688172	0.726359775134863	0	0
10734	STAG3	6.27107142857143	10.3703225806452	0.725676914182925	0	0
339483	MTMR9LP	3.47285714285714	5.74215053763441	0.725468086893416	0	0
25820	ARIH1	22.7996428571429	37.6596774193548	0.724009416738365	0	0
338758	LINC00936	13.6863095238095	22.5878494623656	0.722813441328589	0	0
92521	SPECC1	25.7930952380952	42.5667741935484	0.722742852918312	0	0
26240	FAM50B	12.0980952380952	19.9637634408602	0.722603790979786	0	0
51143	DYNC1LI1	63.9592857142857	105.521182795699	0.722306908817195	0	0
85300	ATCAY	169.459642857143	279.568709677419	0.722261164554569	0	0
29887	SNX10	17.5113095238095	28.8877419354839	0.722170462492194	0	0
54495	TMX3	19.0069047619048	31.3522580645161	0.72204574212676	0	0
55335	NIPSNAP3B	10.995	18.1347311827957	0.721907755721215	0	0
3164	NR4A1	6.72630952380952	11.0920430107527	0.721638041891293	0	0
10142	AKAP9	471.813095238095	777.906129032258	0.721380612449576	1	0
101929567	LOC101929567	6.66988095238095	10.9963440860215	0.721291039208041	0	0
100131187	TSTD1	78.8494047619048	129.986774193548	0.721193071168377	0	0
60	ACTB	2615.4705952381	4310.53720430108	0.720797127170008	0	1
10846	PDE10A	20.3864285714286	33.5962365591398	0.720690575077924	0	0
966	CD59	56.0892857142857	92.4135483870968	0.720379164289437	0	0
22885	ABLIM3	3.44285714285714	5.6694623655914	0.719605611778281	0	0
203523	ZNF449	6.48785714285714	10.6809677419355	0.719228409276893	0	0
55036	CCDC40	6.25797619047619	10.2955913978495	0.718258628701327	0	0
9829	DNAJC6	16.8085714285714	27.6418279569892	0.717655910262036	0	0
51629	SLC25A39	72.3429761904762	118.919462365591	0.717059989144576	1	0
51082	POLR1D	114.394523809524	188.043333333333	0.717047169289546	0	0
662	BNIP1	30.2304761904762	49.6931182795699	0.717042370421462	1	0
5803	PTPRZ1	359.56	591.000752688172	0.716927433626284	0	0
51523	CXXC5	26.140119047619	42.9590322580645	0.716695782484045	0	0
2548	GAA	17.3575	28.5248387096774	0.716659557550191	0	0
160428	ALDH1L2	2.1197619047619	3.48279569892473	0.716343618855529	0	0
2539	G6PD	12.2507142857143	20.1234408602151	0.716011140360484	0	0
84266	ALKBH7	164.13130952381	269.533870967742	0.715616108447859	0	0
56894	AGPAT3	24.5691666666667	40.3394623655914	0.715342930780672	0	1
317648	NOP14-AS1	9.03297619047619	14.8143010752688	0.713717251734405	0	0
11149	BVES	4.1025	6.72591397849462	0.713226993803351	0	0
5281	PIGF	7.10190476190476	11.64	0.712813139500806	0	0
200014	CC2D1B	6.62428571428571	10.8525806451613	0.712201338594056	0	0
432	ASGR1	29.4359523809524	48.2088172043011	0.711717728015361	0	0
4782	NFIC	27.1234523809524	44.4088172043011	0.711305324583435	0	0
23091	ZC3H13	272.131428571429	445.522688172043	0.711195318975815	0	0
4714	NDUFB8	423.946428571429	693.893333333333	0.710831933830414	0	0
7589	ZSCAN21	5.17583333333333	8.47086021505376	0.710717320590934	0	0
204851	HIPK1	41.9760714285714	68.6697849462366	0.710108295464108	0	0
56850	GRIPAP1	54.1464285714286	88.5654838709677	0.709878372203236	0	0
9278	ZBTB22	6.59035714285714	10.7793548387097	0.709842278508756	0	0
56899	ANKS1B	24.2705952380952	39.6948387096774	0.709741943146763	0	0
375190	FAM228B	11.0035714285714	17.9847311827957	0.708800740510594	0	0
57556	SEMA6A	34.4764285714286	56.3478494623656	0.708750217683483	1	0
460	ASTN1	22.155	36.1998924731183	0.708353085160606	0	0
55813	UTP6	34.2865476190476	56.0101075268817	0.708044554197918	1	0
23365	ARHGEF12	30.4502380952381	49.727311827957	0.70758493482542	0	0
1649	DDIT3	15.1389285714286	24.7204301075269	0.70744073975475	0	0
79844	ZDHHC11	5.755	9.39698924731183	0.707382669525025	0	0
10121	ACTR1A	226.667380952381	370.042043010753	0.707112402575401	0	0
29929	ALG6	25.0845238095238	40.9468817204301	0.706956037621169	0	0
205717	KIAA2018	20.2614285714286	33.0732258064516	0.706927868316394	1	1
51545	ZNF581	19.2111904761905	31.3549462365591	0.706746123351929	0	0
9836	LCMT2	7.42952380952381	12.1247311827957	0.706611111444317	0	0
1155	TBCB	479.607380952381	782.568064516129	0.706362375735605	0	0
79159	NOL12	45.2771428571429	73.8331182795699	0.705485168772381	0	0
149371	EXOC8	5.79857142857143	9.45559139784946	0.7054701811703	0	0
123096	SLC25A29	35.8061904761905	58.3879569892473	0.705461797375902	0	0
10682	EBP	74.0347619047619	120.72376344086	0.705434955621858	0	0
65985	AACS	47.7609523809524	77.8306451612903	0.704506711038441	0	0
84513	PPAPDC1B	89.2883333333333	145.436451612903	0.703845319766241	0	0
55631	LRRC40	32.5260714285714	52.9610752688172	0.703335832505051	0	0
54741	LEPROT	57.2777380952381	93.257311827957	0.703242322601561	0	0
1315	COPB1	48.6470238095238	79.1991397849462	0.703133216029441	0	0
256356	GK5	17.2352380952381	28.0590322580645	0.703104023114952	0	0
9135	RABEP1	93.4371428571429	152.102150537634	0.702972486205037	0	0
126382	NR2C2AP	12.124880952381	19.7366666666667	0.702907770708914	0	0
203062	TSNARE1	5.75916666666667	9.37333333333333	0.702702115250005	0	0
6389	SDHA	40.4532142857143	65.827311827957	0.702431944774706	0	0
83852	SETDB2	9.87916666666667	16.0735483870968	0.702227195696192	0	0
10402	ST3GAL6	9.4875	15.4294623655914	0.701587906921928	1	0
57590	WDFY1	18.0182142857143	29.2930107526882	0.701100443463678	0	0
114932	MRFAP1L1	105.374642857143	171.266774193548	0.700717553792816	0	0
9399	STOML1	11.512619047619	18.7098924731183	0.70058519259205	0	0
11097	NUPL2	25.8016666666667	41.9294623655914	0.700500071563929	0	0
83707	TRPT1	25.1546428571429	40.8754838709677	0.700411102333446	0	0
7251	TSG101	138.199047619048	224.495698924731	0.699940131266784	0	0
55869	HDAC8	27.554880952381	44.7506451612903	0.699600587388973	0	0
387763	C11orf96	10.2522619047619	16.6495698924731	0.699542669339447	0	0
3488	IGFBP5	27.240119047619	44.2256989247312	0.699151934473528	0	0
5440	POLR2K	138.142619047619	224.273870967742	0.699103067902628	0	0
3417	IDH1	120.456071428571	195.537741935484	0.698939985263686	0	0
100462977	MTRNR2L1	2.28904761904762	3.71483870967742	0.698552097817423	0	0
84553	FAXC	34.1730952380952	55.4481720430108	0.698278973708308	0	0
54386	TERF2IP	148.506071428571	240.883225806452	0.697812018801424	0	0
51128	SAR1B	44.4865476190476	72.1583870967742	0.697797949024563	0	0
5283	PIGH	14.5221428571429	23.5532258064516	0.697670312111493	0	0
54460	MRPS21	327.996904761905	531.937419354839	0.697574327002235	0	0
1471	CST3	113.036428571429	183.304193548387	0.697452002552951	0	0
23229	ARHGEF9	26.9554761904762	43.6951612903226	0.696895131396828	0	1
1124	CHN2	6.79357142857143	11.0113978494624	0.696755510439316	0	0
222484	LNX2	3.26702380952381	5.29430107526882	0.696463271128333	0	0
50861	STMN3	61.6072619047619	99.8069892473118	0.696040430198628	0	0
334	APLP2	140.405476190476	227.432150537634	0.69583700692169	0	0
51684	SUFU	8.56916666666667	13.8803225806452	0.695814279510407	1	0
598	BCL2L1	25.5565476190476	41.3904301075269	0.695604281602373	0	0
6830	SUPT6H	33.4436904761905	54.1610752688172	0.69552232517251	0	0
153527	ZMAT2	72.8358333333333	117.910967741935	0.69497762135782	0	0
79573	TTC13	11.0204761904762	17.8335483870968	0.694407224730688	0	0
547	KIF1A	209.477857142857	338.768924731183	0.693503790440111	0	0
10092	ARPC5	124.258571428571	200.926344086022	0.69332135960133	0	0
126299	ZNF428	41.9557142857143	67.8268817204301	0.692989851462434	0	0
85369	STRIP1	30.315	49.007311827957	0.692965191094453	1	0
23659	PLA2G15	12.147619047619	19.6305376344086	0.692426114331439	0	0
23348	DOCK9	12.9029761904762	20.8482795698925	0.692224460354308	0	0
2971	GTF3A	106.620833333333	172.260322580645	0.692101074877542	0	0
83640	FAM103A1	39.2720238095238	63.4317204301075	0.69170252578976	0	0
653519	GPR89A	14.4477380952381	23.332688172043	0.69150888522387	0	0
400073	C12orf76	20.9917857142857	33.8993548387097	0.691432918723626	0	0
84033	OBSCN	12.4194047619048	20.051935483871	0.691145467812014	0	0
51447	IP6K2	240.835238095238	388.781935483871	0.690914689365096	0	0
9908	G3BP2	115.341547619048	186.156559139785	0.690604164477436	1	0
26048	ZNF500	5.69833333333333	9.18870967741935	0.689322268658903	0	0
659	BMPR2	72.3615476190476	116.683978494624	0.689311314011767	0	0
10371	SEMA3A	37.0539285714286	59.7477419354839	0.68925768030879	0	0
57586	SYT13	15.1061904761905	24.3563440860215	0.689157716119762	0	0
5929	RBBP5	28.3890476190476	45.7676344086021	0.688993274203315	0	0
266812	NAP1L5	25.1985714285714	40.6029032258065	0.688240942021075	0	0
3376	IARS	58.117380952381	93.6417204301075	0.688181750885734	0	0
253725	FAM21C	13.7215476190476	22.1063440860215	0.688017245487952	0	0
25840	METTL7A	6.10821428571429	9.83903225806452	0.687765747742818	0	0
23357	ANGEL1	4.13357142857143	6.65516129032258	0.687084813876743	0	0
8541	PPFIA3	21.8561904761905	35.1784946236559	0.686651785729016	0	0
84164	ASCC2	25.2125	40.5787096774194	0.686583812141388	0	0
63908	NAPB	18.1407142857143	29.1898924731183	0.686237633679034	0	0
137970	UNC5D	1.21785714285714	1.95935483870968	0.686033780926653	0	0
23165	NUP205	14.100119047619	22.6827956989247	0.685891122842119	0	0
90060	CCDC120	10.4117857142857	16.7467741935484	0.685665701775704	0	0
1400	CRMP1	376.605595238095	605.709892473118	0.685572539458811	0	0
4644	MYO5A	50.8786904761905	81.8196774193548	0.685386310509968	0	0
55173	MRPS10	40.0032142857143	64.3115053763441	0.684960933669553	0	0
54470	ARMCX6	36.7172619047619	59.0204301075269	0.684755956857968	0	0
140680	C20orf96	11.5796428571429	18.6020430107527	0.683870319251603	0	0
23309	SIN3B	22.8341666666667	36.6765591397849	0.683664157431018	0	0
9016	SLC25A14	35.009880952381	56.2217204301075	0.683365445994873	0	0
3643	INSR	33.5759523809524	53.9040860215054	0.682966313625739	0	0
9867	PJA2	107.645	172.785268817204	0.682698913295687	0	0
9870	AREL1	24.2582142857143	38.9320430107527	0.682484700420712	0	0
51155	HN1	1116.69333333333	1791.88301075269	0.682243402304094	0	0
10269	ZMPSTE24	24.91	39.9641935483871	0.681982955296048	0	0
6468	FBXW4	8.01416666666667	12.8560215053763	0.681819829238447	0	0
54886	LPPR1	63.7469047619048	102.22935483871	0.681382322556407	0	0
29916	SNX11	10.3233333333333	16.5525806451613	0.681147276960772	0	0
8499	PPFIA2	86.4160714285714	138.554731182796	0.681084423895	0	0
1352	COX10	9.54142857142857	15.2977419354839	0.681041523572028	0	0
23358	USP24	34.5805952380952	55.438064516129	0.680914187800131	0	0
730094	C16orf52	19.6429761904762	31.4855913978495	0.680678230882461	0	0
22897	CEP164	42.9742857142857	68.8506451612903	0.679996512591454	0	0
148213	ZNF681	14.5222619047619	23.2458064516129	0.678704300410284	0	0
5936	RBM4	49.2941666666667	78.8933333333333	0.678486462144893	0	0
219738	C10orf35	24.775	39.6411827956989	0.678114952237545	0	0
84759	PCGF1	18.9147619047619	30.2547311827957	0.677648150051633	0	0
81551	STMN4	134.24369047619	214.692043010753	0.677414440153964	1	0
817	CAMK2D	22.9121428571429	36.6403225806452	0.677319812006029	0	0
374378	GALNT18	2.70202380952381	4.31838709677419	0.676452183820207	1	0
4701	NDUFA7	201.808452380952	322.508602150538	0.676351041136351	0	0
1838	DTNB	16.0990476190476	25.7260215053763	0.676253018980125	0	0
51077	FCF1	11.547380952381	18.4512903225806	0.676156036530197	0	0
57209	ZNF248	20.7194047619048	33.0952688172043	0.675642432074679	0	0
8976	WASL	33.4409523809524	53.4117204301075	0.675540420018952	0	0
56651	LINC00470	1.92678571428571	3.07698924731183	0.67532326956942	0	0
9114	ATP6V0D1	85.4330952380952	136.382365591398	0.674790156929782	0	0
8690	JRKL	9.73559523809524	15.5401075268817	0.674655392546892	0	0
144983	HNRNPA1L2	8.64857142857143	13.7982795698925	0.673954643553979	0	0
64282	PAPD5	21.4438095238095	34.2062365591398	0.673698159119155	0	1
5621	PRNP	23.0004761904762	36.684623655914	0.673511754440686	0	1
57182	ANKRD50	18.76	29.8947311827957	0.672231410206864	0	0
4141	MARS	31.2695238095238	49.8231182795699	0.672058069128971	0	0
474343	SPIN2B	15.9110714285714	25.3470967741935	0.671789524205772	0	0
102	ADAM10	31.8297619047619	50.7049462365591	0.671750122849424	0	0
1355	COX15	14.0464285714286	22.3621505376344	0.670855577764196	0	0
28951	TRIB2	51.4439285714286	81.8797849462366	0.670506493344179	0	0
55512	SMPD3	38.5107142857143	61.2749462365591	0.670037431175076	0	0
388	RHOB	27.3152380952381	43.4613978494624	0.670028578237554	0	0
221545	C6orf136	12.339880952381	19.6336559139785	0.670000360669512	0	0
1978	EIF4EBP1	160.547023809524	255.376129032258	0.669627756305934	0	0
6940	ZNF354A	17.8415476190476	28.3562365591398	0.668425307190755	0	0
55763	EXOC1	44.5817857142857	70.8460215053763	0.668232433493657	0	0
57670	KIAA1549	48.5285714285714	77.1118279569892	0.66811777682517	0	0
104	ADARB1	16.7625	26.6340860215054	0.668036441922463	0	0
10659	CELF2	248.626666666667	395.021827956989	0.667951333168683	1	0
84159	ARID5B	22.1452380952381	35.1843010752688	0.667935346142553	1	0
388403	YPEL2	3.56452380952381	5.66236559139785	0.667695542462862	0	0
154091	SLC2A12	9.91535714285714	15.7465591397849	0.667299969297469	0	0
6609	SMPD1	10.0534523809524	15.9643010752688	0.66715838080068	0	0
869	CBLN1	15.4952380952381	24.605376344086	0.667148659823069	0	0
65990	FAM173A	11.7992857142857	18.7336559139785	0.666932945417794	0	0
2895	GRID2	2.73452380952381	4.3405376344086	0.666584127357999	0	0
24144	TFIP11	12.142380952381	19.2731182795699	0.66653866846249	0	0
9341	VAMP3	19.202619047619	30.4778494623656	0.666458015162611	0	0
55508	SLC35E3	21.0284523809524	33.3402150537634	0.664920733372685	0	0
2180	ACSL1	13.0804761904762	20.7331182795699	0.664522052758036	0	0
78987	CRELD1	32.3433333333333	51.2635483870968	0.664464971369216	0	0
83786	FRMD8	7.94142857142857	12.5868817204301	0.664450453394854	0	0
7620	ZNF69	15.1222619047619	23.9654838709677	0.664284122648046	0	0
4665	NAB2	11.6615476190476	18.4783870967742	0.664079572102818	0	0
57700	FAM160B1	15.1104761904762	23.9431182795699	0.664061930563705	0	0
80331	DNAJC5	44.7135714285714	70.8433333333333	0.663919312077962	0	0
9811	CTIF	17.7125	28.0549462365591	0.663487294940983	0	0
26578	OSTF1	4.63095238095238	7.3347311827957	0.663435170023304	0	0
257218	SHPRH	30.0475	47.5895698924731	0.663400454294279	0	0
4093	SMAD9	19.6221428571429	31.0724731182796	0.663154471701588	0	0
374875	HSD11B1L	27.4271428571429	43.4150537634409	0.662591028963041	0	0
10849	CD3EAP	4.30142857142857	6.80516129032258	0.661813474810612	0	0
374920	C19orf68	4.86452380952381	7.69591397849462	0.661794087557976	0	0
81555	YIPF5	45.1036904761905	71.3276344086022	0.661215644594559	0	0
83849	SYT15	6.46809523809524	10.2269892473118	0.660968661720947	0	0
[truncated: 9,179 more rows]

## Sheet: Supplemental Table S3B
Supplemental Table S3B. Expression change of ASD genes with dnLoF mutations and epilepsy genes with dnMis mutations during the differentiation from NPCs to excitatory neurons at GW16.
Column "dnLoF-ASD": 3+=at least three dnLoF mutations, 2=two dnLoF mutations, 1=only one dnLoF mutation, and 0=no dnLoF mutation.
Column "dnMis-Epi": 2+=at least two dnMis mutations, 1=only one dnMis mutation, and 0=no dnMis mutation.
Gene ID	Symbol	Average expression (NPCs)	Average expression (Ex)	log2(fold change, Ex/NPCs)	dnLoF-ASD	dnMis-Epi
887	CCKBR	2.00211382113821	21.7252110091743	3.43977428995843	0	0
6281	S100A10	3.98593495934959	40.0073211009174	3.32727395448954	0	0
6588	SLN	2.73325203252033	25.4522752293578	3.21910422576196	0	0
100996635	LOC100996635	5.09390243902439	42.3604403669725	3.05587435348154	0	0
85455	DISP2	1.30479674796748	10.8077798165138	3.05017319195115	0	0
2172	FABP6	4.24951219512195	35.0107889908257	3.04243042644227	0	0
54769	DIRAS2	1.77447154471545	14.4922935779817	3.02982459187489	0	0
347730	LRRTM1	1.80252032520325	14.3579266055046	2.99375999550912	0	0
25769	SLC24A2	2.57390243902439	20.2710825688073	2.97739386147663	0	0
57469	PNMAL2	1.60642276422764	12.4264587155963	2.95149169289461	0	0
255928	SYT14	1.79691056910569	13.8961100917431	2.9510905750434	0	0
10718	NRG3	1.64422764227642	12.1955779816514	2.89087617482529	0	0
27344	PCSK1N	85.9139024390244	625.444770642202	2.8639189842997	0	0
1028	CDKN1C	5.42666666666667	38.9285871559633	2.84269178669422	0	0
5798	PTPRN	2.73073170731707	19.0684587155963	2.80382875447648	0	0
9362	CPNE6	1.1130081300813	7.60383486238532	2.7722630693133	0	0
84851	TRIM52	5.92365853658537	40.4673211009174	2.77219696168315	0	0
284485	RIIAD1	1.4369918699187	9.76609174311927	2.76472943131307	0	0
152789	JAKMIP1	2.65479674796748	17.4066972477064	2.71296917433107	1	0
3881	KRT31	32.2028455284553	207.594128440367	2.68850555988549	0	0
154661	RUNDC3B	6.85658536585366	44.097871559633	2.68514683720728	1	0
3050	HBZ	8.18861788617886	51.2740183486239	2.64653609367825	0	0
83897	KRTAP3-2	3.04894308943089	18.2784403669725	2.5837618488714	0	0
7111	TMOD1	5.57967479674797	33.2885871559633	2.57677469625938	0	0
6447	SCG5	43.980487804878	260.536	2.56654722219931	0	0
4320	MMP11	3.17959349593496	18.6948440366972	2.55572619843172	0	0
50651	SLC45A1	3.25333333333333	18.9164036697248	2.53964728168665	0	0
118881	COMTD1	5.65593495934959	32.8549724770642	2.53827429853875	0	0
202559	KHDRBS2	4.83073170731707	27.4018532110092	2.503959832534	0	0
116986	AGAP2	2.27406504065041	12.8417981651376	2.49750180659104	0	0
57134	MAN1C1	3.39861788617886	19.1264403669725	2.49254832700157	0	0
2259	FGF14	1.03658536585366	5.7823119266055	2.47980750552582	0	0
8492	PRSS12	6.29487804878049	35.0517064220183	2.47723434678854	0	0
5664	PSEN2	1.44170731707317	7.85288073394495	2.44544367539974	0	0
3046	HBE1	8.6820325203252	47.1763853211009	2.44196015115383	0	0
55715	DOK4	4.20260162601626	22.6903302752294	2.43272299689793	0	0
6503	SLA	158.792601626016	845.168660550459	2.41209557529054	0	0
1646	AKR1C2	12.4312195121951	65.401119266055	2.39534749319962	0	0
158696	LINC00889	1.25731707317073	6.42038532110092	2.35231136580265	0	0
100506551	LOC100506551	1.72682926829268	8.80721100917431	2.35055978079795	0	0
138046	RALYL	16.1144715447154	81.9206055045872	2.34586950118066	0	0
374946	DRAXIN	5.84390243902439	29.652752293578	2.34316201990023	0	0
5864	RAB3A	25.5121138211382	128.136550458716	2.32842771325272	0	0
27239	GPR162	4.60829268292683	23.000495412844	2.3193606824609	0	0
64744	SMAP2	4.81544715447154	23.9556880733945	2.3146265765627	1	0
4482	MSRA	29.9043089430894	148.386642201835	2.31093594213049	0	0
150	ADRA2A	21.5929268292683	107.082844036697	2.31009664855786	0	0
10815	CPLX1	2.24422764227642	11.117504587156	2.30854207231541	0	0
170261	ZCCHC12	2.9649593495935	14.6707339449541	2.30685681744156	0	0
27065	NSG1	81.6594308943089	399.596825688073	2.29085370451834	0	0
440498	HSBP1L1	1.98544715447155	9.71275229357798	2.29041620675704	0	0
3912	LAMB1	4.69178861788618	22.9279816513761	2.28889943887158	0	0
25797	QPCT	2.1539837398374	10.4575412844037	2.27946442917595	0	0
8214	DGCR6	5.49983739837398	26.6583853211009	2.27712852870845	0	0
57596	BEGAIN	2.43926829268293	11.7530825688073	2.2685188402707	0	0
758	MPPED1	9.53910569105691	45.8597981651376	2.26530408311306	0	0
728743	LOC728743	3.57016260162602	17.1466605504587	2.2638659395047	0	0
401145	CCSER1	3.72772357723577	17.743119266055	2.25089287124653	1	0
79668	PARP8	4.37642276422764	20.6517981651376	2.23844338857867	0	0
3815	KIT	4.07333333333333	19.0466422018349	2.225254898021	0	0
26230	TIAM2	3.67918699186992	17.1837247706422	2.22358388401194	0	0
5453	POU3F1	2.0109756097561	9.3351376146789	2.21477570628072	0	0
2180	ACSL1	4.50463414634146	20.7534862385321	2.20387186115699	0	0
3763	KCNJ6	4.66365853658537	21.4558532110092	2.20183720589693	0	0
6620	SNCB	2.66154471544715	12.2068623853211	2.19735671237457	0	0
2281	FKBP1B	7.44991869918699	33.833871559633	2.18317168535565	0	0
11075	STMN2	925.128130081301	4186.03486238532	2.17785922919638	0	0
254122	SNX32	3.2290243902439	14.5558532110092	2.17242916404199	0	0
3039	HBA1	48.6975609756098	219.07319266055	2.16949153515825	0	0
221687	RNF182	16.3868292682927	73.6518348623853	2.16818473657184	0	0
59269	HIVEP3	12.6260975609756	56.7380366972477	2.16790742612866	3+	0
83694	RPS6KL1	12.2773170731707	54.5202752293578	2.15079751802965	0	0
23108	RAP1GAP2	2.48292682926829	11.0161651376147	2.14950843975739	0	0
5144	PDE4D	43.1034959349593	191.22576146789	2.14940010294512	0	0
160857	CCDC122	9.70048780487805	43.0325688073395	2.14929976129075	0	0
81544	GDPD5	4.20048780487805	18.4035412844037	2.13135461857959	0	0
374378	GALNT18	1.4950406504065	6.5448623853211	2.13017814577666	1	0
65989	DLK2	3.36333333333333	14.7148623853211	2.12931037640819	0	0
57574	MARCH4	5.2560162601626	22.8870458715596	2.12248961617735	0	0
101927043	LOC101927043	1.57731707317073	6.8554128440367	2.11977084939171	0	0
84708	LNX1	12.5383739837398	54.0703669724771	2.10848788095767	0	0
54972	TMEM132A	6.64593495934959	28.623119266055	2.106636822199	0	1
100288346	NCAM1-AS1	1.18040650406504	5.08170642201835	2.10602925590637	0	0
93986	FOXP2	2.86439024390244	12.3121100917431	2.10377807348389	0	0
4753	NELL2	61.9666666666667	265.258293577982	2.09783358967835	0	0
9814	SFI1	2.02130081300813	8.63271559633028	2.09453041814985	0	0
22928	SEPHS2	14.4680487804878	61.7362568807339	2.09324764652907	0	0
26470	SEZ6L2	26.5184552845528	112.568990825688	2.0857408203926	0	0
6860	SYT4	48.1152845528455	204.216330275229	2.08553107079497	0	0
11000	SLC27A3	2.92544715447154	12.3222385321101	2.07453530597917	0	0
139324	HDX	4.78211382113821	20.124752293578	2.07325065208641	0	0
54715	RBFOX1	59.2209756097561	248.988201834862	2.07189721975938	0	0
340542	BEX5	24.74	103.720220183486	2.06777976851948	0	0
125488	TTC39C	3.83544715447154	16.0033944954128	2.06091126018483	0	0
63974	NEUROD6	490.835609756098	2047.24377981651	2.06037108015108	0	0
2596	GAP43	186.353821138211	775.680495412844	2.0574181238777	0	0
10505	SEMA4F	4.40764227642276	18.3308073394495	2.05619128269383	0	0
5420	PODXL	3.05146341463415	12.6684220183486	2.05366363472459	0	0
10742	RAI2	10.3870731707317	42.8058348623853	2.04301826927807	0	0
56917	MEIS3	17.999837398374	73.5717614678899	2.03116825900585	0	0
9957	HS3ST1	17.2706504065041	70.5092844036697	2.02949082353727	0	0
220965	FAM13C	2.96414634146341	12.0758348623853	2.02643435204852	0	0
11173	ADAMTS7	12.8658536585366	52.3432110091743	2.02445524554938	0	0
677800	SNORA12	10.19	41.452880733945	2.02431831260967	0	0
7016	TESK1	4.33764227642276	17.6401467889908	2.02387958148564	0	0
9463	PICK1	12.0119512195122	48.7870642201835	2.02202814992223	0	0
1645	AKR1C1	24.2047967479675	98.2252110091743	2.02080038223102	0	0
389119	FAM212A	1.86154471544715	7.54970642201835	2.019920273844	0	0
144402	CPNE8	7.92609756097561	32.1423302752294	2.01979189581927	0	1
9583	ENTPD4	11.9815447154472	48.5822385321101	2.01961504786233	0	0
2774	GNAL	15.2338211382114	61.7457431192661	2.01906181561613	0	0
84620	ST6GAL2	25.0117886178862	100.681027522936	2.00911171055819	0	0
9568	GABBR2	7.99626016260163	32.0996146788991	2.00515866264677	0	2+
57522	SRGAP1	140.160406504065	560.904110091743	2.00067529030468	0	0
9636	ISG15	3.00414634146341	12.0166788990826	2.00001122942968	0	0
23057	NMNAT2	18.209918699187	72.788623853211	1.99898850777255	0	0
146664	MGAT5B	2.89788617886179	11.5797064220183	1.99852584147424	0	0
84905	ZNF341	2.16130081300813	8.6342752293578	1.99817519883619	0	0
151556	GPR155	9.10048780487805	36.2076330275229	1.99227808383358	0	0
81844	TRIM56	1.67674796747968	6.66581651376147	1.99111575247985	0	0
8609	KLF7	40.8630894308943	162.070642201835	1.98775259442099	0	0
2745	GLRX	43.0980487804878	170.613724770642	1.98503924742713	0	0
646113	LINC00643	8.21642276422764	32.4623302752294	1.98218424551444	0	0
29116	MYLIP	1.55308943089431	6.13078899082569	1.98093184468105	0	0
728323	LOC728323	8.6279674796748	33.99	1.9780177180294	0	0
57030	SLC17A7	5.64178861788618	22.1236880733945	1.97136738816248	0	0
338811	FAM19A2	2.41430894308943	9.44987155963303	1.96868442069156	0	0
6857	SYT1	259.688943089431	1015.26517431193	1.9670000961059	0	0
54923	LIME1	2.94552845528455	11.5018165137615	1.96526333265113	0	0
5791	PTPRE	2.89422764227642	11.293504587156	1.96424294600089	0	0
22941	SHANK2	10.8659349593496	42.3543486238532	1.96269778561459	2	0
55129	ANO10	6.75056910569106	26.2922935779817	1.96155896070071	0	0
10769	PLK2	16.8517073170732	65.559504587156	1.95991018818845	0	0
1600	DAB1	8.4019512195122	32.634495412844	1.95760141796428	0	0
8715	NOL4	30.8536585365854	119.661596330275	1.95544673913434	0	0
4644	MYO5A	17.9970731707317	69.6462935779817	1.95228427490223	0	0
57586	SYT13	5.56186991869919	21.4725871559633	1.94885411851858	0	0
10512	SEMA3C	58.4386991869919	225.056220183486	1.94528946897017	0	0
828	CAPS	1.47317073170732	5.67216513761468	1.94497489553453	0	0
54033	RBM11	2.11048780487805	8.11409174311927	1.94285312173752	0	0
3751	KCND2	4.19780487804878	16.111504587156	1.94038421359963	0	0
51412	ACTL6B	19.620162601626	75.1297247706422	1.93704681921562	0	0
6505	SLC1A1	3.24691056910569	12.420623853211	1.93559808433177	0	0
388695	LYSMD1	2.53292682926829	9.65825688073394	1.93095743405297	0	0
66008	TRAK2	5.74642276422764	21.8781100917431	1.92875207749281	0	0
6804	STX1A	23.3635772357724	88.839871559633	1.926946122565	0	0
256281	NUDT14	30.4682113821138	115.304128440367	1.920067454226	0	0
401233	HTATSF1P2	1.98951219512195	7.48926605504587	1.9124095997451	0	0
26059	ERC2	12.6881300813008	47.7622018348624	1.91238987926281	0	0
50863	NTM	79.4114634146341	298.30071559633	1.90934825130866	0	0
8495	PPFIBP2	1.51674796747968	5.69139449541284	1.90780080434494	0	0
6446	SGK1	2.18983739837398	8.21251376146789	1.90700013330617	0	0
2857	GPR34	2.02609756097561	7.59216513761468	1.90580772814672	0	0
4645	MYO5B	5.44520325203252	20.4015779816514	1.90562293703356	0	0
23072	HECW1	6.40560975609756	23.946495412844	1.90240671820122	0	0
114879	OSBPL5	5.25113821138211	19.5993211009174	1.9001016084217	0	1
9265	CYTH3	7.53382113821138	28.063871559633	1.89726036258031	0	0
50486	G0S2	3.16934959349594	11.7337431192661	1.88840460394235	0	0
6616	SNAP25	77.4684552845528	284.853706422018	1.87854030036374	0	1
6853	SYN1	3.57243902439024	13.1155229357798	1.87629403895575	0	0
137970	UNC5D	3.46365853658537	12.6959449541284	1.87399916353492	0	0
90233	ZNF551	4.97593495934959	18.1759266055046	1.86898938117797	0	0
57624	NYAP2	6.68934959349594	24.357119266055	1.86440566542305	0	0
23245	ASTN2	5.81056910569106	21.1084220183486	1.86106735475308	0	0
54329	GPR85	30.5487804878049	110.218422018349	1.85117868387909	0	0
81565	NDEL1	11.6130894308943	41.7361467889908	1.84554558903404	0	0
85446	ZFHX2	10.959593495935	39.3373027522936	1.84370375143052	0	0
10406	WFDC2	13.5324390243902	48.3650642201835	1.83754342708823	0	0
478	ATP1A3	9.8920325203252	35.3463302752294	1.83722155165647	0	1
2675	GFRA2	1.74487804878049	6.22066055045872	1.83394157469121	0	0
8718	TNFRSF25	3.02284552845528	10.767119266055	1.83265314736144	0	0
29106	SCG3	120.53837398374	429.185155963303	1.83210767046803	0	0
2257	FGF12	16.1175609756098	57.334	1.83075749304977	0	1
9783	RIMS3	5.11382113821138	18.082495412844	1.82212017902699	0	0
8786	RGS11	2.95959349593496	10.4536330275229	1.82053348129888	0	0
387923	SERP2	11.9169105691057	41.9224403669725	1.81471243172802	0	0
376267	RAB15	6.05016260162602	21.2632844036697	1.81331863667941	0	0
23671	TMEFF2	3.87276422764228	13.585504587156	1.81063257208602	0	0
6252	RTN1	655.050487804878	2296.14493577982	1.8095356984511	0	1
100775107	RBM5-AS1	2.98918699186992	10.449504587156	1.80560949118095	0	0
11238	CA5B	2.63276422764228	9.16460550458716	1.79949445124351	0	0
146760	RTN4RL1	2.66048780487805	9.25012844036697	1.79778260743017	0	0
100130093	LOC100130093	6.04333333333333	20.9992660550459	1.79692248080432	0	0
29118	DDX25	8.33113821138211	28.9359266055046	1.79627632667021	0	0
90075	ZNF30	4.19373983739837	14.5375412844037	1.79347401836144	0	0
203062	TSNARE1	3.43626016260163	11.8889908256881	1.7907150862937	0	0
5291	PIK3CB	3.48959349593496	12.0640550458716	1.78958402521832	0	0
26503	SLC17A5	6.24666666666667	21.5874128440367	1.78903190082372	0	0
25946	ZNF385A	1.72560975609756	5.95124770642202	1.78608592956123	0	0
126433	FBXO27	1.49528455284553	5.1462752293578	1.78310856070019	0	0
4324	MMP15	5.42544715447155	18.6724403669725	1.78309653917933	0	0
3097	HIVEP2	20.1678048780488	69.2411926605505	1.77957650953116	0	0
23768	FLRT2	30.7474796747967	105.482972477064	1.77847006673857	0	0
79007	DBNDD1	11.4580487804878	39.2989908256881	1.77813088052497	0	0
5256	PHKA2	5.26869918699187	18.066495412844	1.7777979580704	0	0
115827	RAB3C	4.99365853658537	17.1065871559633	1.77638288501708	0	0
22924	MAPRE3	15.3925203252033	52.5947889908257	1.77269039306215	0	0
26047	CNTNAP2	27.4280487804878	93.6854495412844	1.77217300453811	0	0
645644	FLJ42627	9.24617886178862	31.4892660550459	1.76793095581608	0	0
114819	CROCCP3	5.06910569105691	17.2518165137615	1.76694512750048	0	0
266722	HS6ST3	21.6188617886179	73.11	1.75777818315679	0	0
79953	SYNDIG1	8.3909756097561	28.3576513761468	1.75682758518703	0	0
10095	ARPC1B	3.38040650406504	11.419119266055	1.75618273231735	0	0
27319	BHLHE22	80.8769105691057	272.732403669725	1.75368632514278	0	0
80110	ZNF614	3.96756097560976	13.367871559633	1.7524454765076	1	0
221294	NT5DC1	4.71975609756098	15.8714128440367	1.74964634735807	0	0
23040	MYT1L	104.312926829268	350.646422018349	1.74909905404314	2	0
11007	CCDC85B	5.82910569105691	19.5943302752294	1.7490897977867	0	0
1846	DUSP4	20.4028455284553	68.4460917431193	1.74619779134578	0	0
131601	TPRA1	5.93268292682927	19.8220733944954	1.74035129181968	0	0
23314	SATB2	52.6005691056911	175.433247706422	1.73777187616264	0	0
3720	JARID2	12.2460975609756	40.7936146788991	1.73602126670315	1	0
10243	GPHN	11.5554471544715	38.3848440366972	1.73196369820359	0	1
133308	SLC9B2	6.33	21.0049357798165	1.7304509701902	0	0
79885	HDAC11	4.07691056910569	13.5103853211009	1.72852060603321	0	0
64089	SNX16	3.0990243902439	10.2676513761468	1.72822020262897	0	0
55628	ZNF407	6.09138211382114	20.1417064220183	1.72534440186961	0	0
56129	PCDHB7	3.77934959349593	12.4919816513761	1.72479247482496	0	0
2042	EPHA3	25.6071544715447	84.583247706422	1.72382500986143	0	0
5800	PTPRO	48.2125203252033	158.708733944954	1.71890176954284	0	1
10500	SEMA6C	9.09138211382114	29.9228073394495	1.71867399298383	0	0
84502	JPH4	25.5360162601626	83.9976330275229	1.71781519939093	0	0
23031	MAST3	5.25731707317073	17.2927339449541	1.71776732128544	0	0
441178	LOC441178	1.18463414634146	3.88842201834862	1.71474322943675	0	0
726	CAPN5	5.39926829268293	17.7211376146789	1.71463540917246	0	0
84258	SYT3	5.81756097560976	19.0798348623853	1.71356235260358	0	0
79570	NKAIN1	16.7865040650407	54.8899449541284	1.70924008470925	0	0
4761	NEUROD2	139.131869918699	454.84495412844	1.70892192321798	0	0
51291	GMIP	5.64536585365854	18.4447889908257	1.70807430017863	0	0
147381	CBLN2	7.29512195121951	23.8276513761468	1.70763275546088	0	0
91584	PLXNA4	24.7174796747967	80.6598165137615	1.70631847797131	0	0
57154	SMURF1	4.11707317073171	13.4045137614679	1.70302789329092	1	1
10716	TBR1	10.9450406504065	35.6298899082569	1.7028107129699	0	0
27075	TSPAN13	94.9358536585366	308.717724770642	1.70126337018763	0	0
84804	MFSD9	2.16292682926829	7.03033027522936	1.70060760624053	0	0
79745	CLIP4	3.2420325203252	10.5292660550459	1.69943440898217	0	0
23467	NPTXR	6.79642276422764	22.0522201834862	1.69807640967264	0	0
4345	CD200	40.9357723577236	132.486220183486	1.69440829276383	0	0
389073	C2orf80	7.69138211382114	24.8789724770642	1.69361212842675	0	0
9308	CD83	4.26382113821138	13.7837431192661	1.69274889485356	0	0
101929570	LOC101929570	9.72430894308943	31.4030091743119	1.6912351772234	0	0
387763	C11orf96	1.53780487804878	4.9363119266055	1.68256110075295	0	0
163404	LPPR5	15.5482926829268	49.8967706422018	1.68219027572912	0	0
111	ADCY5	3.93821138211382	12.6317247706422	1.68143918756676	0	0
10382	TUBB4A	20.9765853658537	67.1163302752294	1.67788398496761	0	1
79805	VASH2	19.6769918699187	62.9036513761468	1.67663407903518	0	0
1917	EEF1A2	4.31626016260163	13.7960733944954	1.67640397799535	0	2+
1746	DLX2	4.84406504065041	15.4637247706422	1.67459772408635	0	0
644128	RPL23AP53	6.20471544715447	19.794623853211	1.67367169893376	0	0
57683	ZDBF2	4.05991869918699	12.947247706422	1.67312270348632	0	0
132299	OCIAD2	168.093902439024	535.181541284404	1.67076096531564	0	0
57486	NLN	16.8653658536585	53.685871559633	1.67047885149624	0	0
30010	NXPH1	2.98032520325203	9.4565504587156	1.66584425475772	0	0
57567	ZNF319	3.73365853658537	11.818752293578	1.66241584175991	0	0
57731	SPTBN4	2.46081300813008	7.76071559633028	1.65705465119785	0	0
10678	B3GNT2	10.0849593495935	31.8005137614679	1.65684480477849	0	0
84894	LINGO1	13.96	44.0041651376147	1.65634114445204	0	0
8829	NRP1	34.3962601626016	108.107376146789	1.65214134406735	0	0
56126	PCDHB10	9.92170731707317	31.146880733945	1.65042738438255	0	0
1630	DCC	24.5454471544715	77.0325137614679	1.65001205568076	0	0
1009	CDH11	2.89593495934959	9.06889908256881	1.64689822479394	0	0
23329	TBC1D30	10.7491056910569	33.6209174311927	1.64514245785471	0	0
862	RUNX1T1	97.6407317073171	305.132422018349	1.64388047079342	0	0
587	BCAT2	10.8464227642276	33.8586422018349	1.64230481057117	0	0
80169	CTC1	5.69422764227642	17.6090458715596	1.62874466529327	0	0
7596	ZNF45	2.39666666666667	7.41069724770642	1.62858001732254	0	0
78997	GDAP1L1	66.220406504065	204.588495412844	1.62737724848154	0	0
9796	PHYHIP	10.8882926829268	33.6077798165138	1.62601748619755	0	0
23171	GPD1L	12.2708943089431	37.8666972477064	1.62568919695379	0	0
440	ASNS	47.8426829268293	147.612422018349	1.62544393301082	0	0
56978	PRDM8	39.8618699186992	122.942422018349	1.62490151853008	0	0
27445	PCLO	51.3923577235772	158.457302752294	1.62446840491385	0	0
9543	IGDCC3	23.2607317073171	71.5832660550459	1.62172588955797	0	0
84867	PTPN5	9.15780487804878	28.1801834862385	1.62160727384125	0	0
346653	FAM71F2	2.97544715447154	9.15166972477064	1.62092849254045	0	0
256643	CXorf23	13.460487804878	41.3351559633028	1.61863863647143	0	0
9456	HOMER1	7.20024390243902	22.0898165137615	1.61726375255787	0	0
1113	CHGA	24.9704878048781	76.6026422018349	1.61717014992966	0	0
284613	CYB561D1	2.81934959349593	8.64842201834862	1.61707454400693	1	0
140612	ZFP28	5.22642276422764	15.9582752293578	1.61040899969657	0	0
11146	GLMN	15.2888617886179	46.6681100917431	1.60995603774088	0	0
197407	ZNF48	6.94861788617886	21.1883853211009	1.60847569765974	0	0
83988	NCALD	14.9209756097561	45.4962752293578	1.60840656753825	0	0
9363	RAB33A	24.4487804878049	74.4880917431193	1.60724729841302	0	0
22809	ATF5	1.72016260162602	5.23822018348624	1.60653175839183	0	0
11098	PRSS23	12.7447154471545	38.787119266055	1.60567846785627	0	0
604	BCL6	2.68317073170732	8.16297247706422	1.60515573597008	0	0
204962	SLC44A5	11.0259349593496	33.4502935779817	1.60111787651512	0	0
1840	DTX1	9.75406504065041	29.5589724770642	1.59952062219714	0	0
7562	ZNF708	14.7517073170732	44.653504587156	1.59789147110736	0	0
100128398	LOC100128398	3.2550406504065	9.85284403669725	1.59786466002332	0	0
1183	CLCN4	16.5730081300813	50.1595963302752	1.59769025108419	0	1
2051	EPHB6	70.7912195121951	213.958366972477	1.59568776363575	0	0
11182	SLC2A6	12.2428455284553	36.9946605504587	1.59537814755281	0	0
2562	GABRB3	22.600406504065	68.2039449541284	1.59350646592029	1	2+
10220	GDF11	2.01861788617886	6.09148623853211	1.59342642687057	0	0
254428	SLC41A1	3.58154471544715	10.7946422018349	1.5916615654558	0	0
79918	SETD6	5.30235772357724	15.9559633027523	1.58938980044988	0	0
3798	KIF5A	5.29650406504065	15.9299266055046	1.58862728570732	0	0
55117	SLC6A15	7.6330081300813	22.9557798165138	1.58853380868995	0	0
57144	PAK7	33.0479674796748	99.253871559633	1.58656183238706	0	0
2354	FOSB	3.3779674796748	10.1356146788991	1.5852062401223	0	0
8635	RNASET2	7.21414634146341	21.623119266055	1.58367406148703	0	0
54622	ARL15	2.87926829268293	8.62128440366972	1.58220059210014	0	0
91	ACVR1B	13.4847154471545	40.3356697247706	1.5807311320112	0	0
816	CAMK2B	20.9953658536585	62.7202568807339	1.57886054025143	0	0
140700	SAMD10	9.92723577235772	29.6433577981651	1.57824491361983	0	0
1525	CXADR	88.9488617886179	265.587357798165	1.5781384250673	0	0
7163	TPD52	3.13073170731707	9.33866055045872	1.57671575829134	0	0
79078	C1orf50	17.3192682926829	51.5981834862385	1.57494229633872	0	0
84267	C9orf64	4.54739837398374	13.5222935779817	1.57222657271028	0	0
6618	SNAPC2	14.2308130081301	42.3005137614679	1.57165710015667	0	0
3747	KCNC2	2.5449593495935	7.56438532110092	1.57158024194094	0	0
534	ATP6V1G2	50.3043089430894	149.08880733945	1.56741806497745	0	0
1780	DYNC1I1	47.319837398374	140.143743119266	1.56639031363326	0	0
10044	SH2D3C	5.89642276422764	17.4513027522936	1.56542286645999	0	0
10752	CHL1	58.9843902439024	174.400990825688	1.56400312435787	0	0
83642	SELO	6.12943089430894	18.1006055045872	1.56221292557072	0	0
53822	FXYD7	2.50121951219512	7.37812844036697	1.56062322708511	0	0
4808	NHLH2	2.18788617886179	6.43163302752294	1.55564740611448	0	0
84898	PLXDC2	3.05154471544715	8.96873394495413	1.55536461316487	0	0
57526	PCDH19	8.74341463414634	25.6826055045872	1.55452284966372	0	0
81855	SFXN3	15.4586991869919	45.3825137614679	1.55371759787418	0	0
581	BAX	6.39853658536585	18.7493027522936	1.5510230578006	0	0
7275	TUB	7.34560975609756	21.4647706422018	1.54701659882231	0	0
23143	LRCH1	11.2428455284553	32.8411743119266	1.54649849162406	0	0
1850	DUSP8	8.83162601626016	25.7932844036697	1.54624450507484	0	0
126526	C19orf47	2.18186991869919	6.36873394495413	1.54544151244292	0	0
11119	BTN3A1	9.24666666666667	26.9612293577982	1.5438809939994	0	0
57715	SEMA4G	4.34658536585366	12.6385688073394	1.53987871767381	0	0
28969	BZW2	71.1894308943089	206.798623853211	1.53849161207797	0	0
84966	IGSF21	4.19113821138211	12.1628440366972	1.53706661028164	0	0
2182	ACSL4	11.6780487804878	33.8880183486239	1.53697603303778	0	0
55163	PNPO	2.51016260162602	7.27482568807339	1.53513185892043	0	0
57554	LRRC7	18.4054471544715	53.2403119266055	1.5323862238338	0	0
58527	ABRACL	69.7506504065041	201.731137614679	1.53215520920609	0	0
54733	SLC35F2	7.04162601626016	20.3656146788991	1.53215484649393	0	0
80034	CSRNP3	56.4756910569106	163.016201834862	1.52931343380974	0	0
2823	GPM6A	965.251951219512	2784.72809174312	1.52855899522662	0	0
64762	GAREM	33.4652032520325	96.4862385321101	1.52766141432032	1	0
92691	TMEM169	7.99788617886179	23.0573211009174	1.52753424935681	0	0
56127	PCDHB9	7.07951219512195	20.3838532110092	1.52570493179363	0	0
6785	ELOVL4	14.5065853658537	41.7377247706422	1.52464398723213	0	0
6855	SYP	9.07479674796748	26.1024587155963	1.52424847161471	0	0
64746	ACBD3	15.9351219512195	45.7895779816514	1.52280920843592	0	0
84870	RSPO3	8.49975609756097	24.3936697247706	1.52101346152537	0	0
254263	CNIH2	16.7560975609756	48.0743486238532	1.52058112080576	0	0
57222	ERGIC1	2.74666666666667	7.87866055045872	1.52026854153919	0	0
55885	LMO3	137.273983739837	393.456770642202	1.51914690374252	0	0
29944	PNMA3	3.23243902439024	9.25354128440367	1.51738242775283	0	0
777	CACNA1E	46.2048780487805	132.122568807339	1.5157598484144	0	1
22870	PPP6R1	9.49349593495935	27.1240733944954	1.51456249760436	0	0
283212	KLHL35	7.78056910569106	22.2026055045872	1.51278139928258	0	0
84251	SGIP1	9.80813008130081	27.9841467889908	1.51255974379875	0	0
10873	ME3	17.1130894308943	48.8135779816514	1.51218227008418	0	0
25830	SULT4A1	12.9780487804878	37.0153211009174	1.51204904995658	0	0
1436	CSF1R	2.21544715447154	6.31335779816514	1.5108096012319	0	0
23316	CUX2	10.2024390243902	29.0735412844037	1.51079272048767	1	1
3728	JUP	19.07	54.2746422018349	1.50897346645111	1	0
3047	HBG1	62.0033333333333	176.187064220183	1.5066903216719	0	0
80216	ALPK1	6.60032520325203	18.7483119266055	1.50615168902587	0	0
220001	VWCE	4.16146341463415	11.8166055045872	1.50565280055074	0	0
22954	TRIM32	7.28934959349593	20.6922752293578	1.50523028805174	0	0
8537	BCAS1	2.00723577235772	5.69179816513762	1.5036744164977	0	0
11067	C10orf10	1.39983739837398	3.96625688073394	1.50251886191917	0	0
321	APBA2	29.679837398374	84.070256880734	1.50211229318769	0	0
64840	PORCN	6.54788617886179	18.5389724770642	1.50146013583278	0	0
10435	CDC42EP2	3.23479674796748	9.15607339449541	1.50105396130418	0	0
22885	ABLIM3	1.74642276422764	4.93994495412844	1.50009212516068	0	0
441631	TSPAN11	3.15	8.90880733944954	1.49988047623996	0	0
3043	HBB	37.6186178861789	106.390844036697	1.49985524818078	0	0
222537	HS3ST5	5.1669918699187	14.6102018348624	1.49957958976292	0	0
10962	MLLT11	814.90918699187	2304.14066055046	1.49951759115602	0	0
23506	GLTSCR1L	10.159756097561	28.7256513761468	1.49947383931017	0	0
400927	LOC400927	4.54130081300813	12.8315229357798	1.49851490154446	0	0
51440	HPCAL4	5.63845528455285	15.9045504587156	1.49606771470447	0	0
116448	OLIG1	3.21089430894309	9.05214678899083	1.49528480190901	0	0
3880	KRT19	6.69235772357724	18.8594678899083	1.49470250341898	0	0
5274	SERPINI1	5.86292682926829	16.4957981651376	1.49240562900609	0	0
4062	LY6H	73.0061788617886	205.267027522936	1.49141142645135	0	0
9066	SYT7	12.1761788617886	34.190495412844	1.48953387070425	0	0
6461	SHB	13.0946341463415	36.7312660550459	1.48803287130857	0	0
153129	SLC38A9	6.52268292682927	18.2912844036697	1.48761897917125	0	0
3321	IGSF3	25.1456910569106	70.3874862385321	1.4850077614354	1	0
5789	PTPRD	87.2891869918699	243.574697247706	1.48048941741272	0	0
339761	CYP27C1	2.18585365853659	6.08519266055046	1.47710612342181	1	0
6877	TAF5	3.35674796747967	9.33856880733945	1.47613724488632	0	0
283848	CES4A	4.97536585365854	13.822495412844	1.47414357252721	0	0
83891	SNX25	3.12617886178862	8.68433027522936	1.47401427104895	0	0
57578	UNC79	24.4016260162602	67.6306788990826	1.47070055028485	1	0
123879	DCUN1D3	2.58	7.14761467889908	1.47009079651134	0	0
9348	NDST3	3.6469918699187	10.1020550458716	1.46986991946355	0	0
55799	CACNA2D3	3.47560975609756	9.62678899082569	1.4697885638828	2	0
2845	GPR22	5.42764227642276	15.020752293578	1.46855952579631	0	0
1759	DNM1	13.8935772357724	38.4370458715596	1.46807935649459	0	2+
57575	PCDH10	9.33528455284553	25.8248990825688	1.46799680775386	0	0
2893	GRIA4	2.72268292682927	7.53104587155963	1.46782125116359	0	0
23543	RBFOX2	176.317642276423	487.688146788991	1.46778207084371	0	0
22800	RRAS2	9.15536585365854	25.2911926605505	1.46594562878434	0	0
10998	SLC27A5	5.11756097560976	14.1272293577982	1.46495025890434	0	0
7673	ZNF222	6.39764227642276	17.6589174311927	1.46478467052533	0	0
91663	MYADM	2.81609756097561	7.76425688073394	1.46315053484647	0	0
8618	CADPS	15.1589430894309	41.7700183486239	1.46229860769235	0	0
4494	MT1F	28.0012195121951	77.1492110091743	1.46216174174219	0	0
27439	CECR6	6.63089430894309	18.2682752293578	1.46206506569584	0	0
79641	ROGDI	46.0160975609756	126.709376146789	1.4613127391764	0	0
9914	ATP2C2	2.5730081300813	7.08385321100917	1.46107830176043	0	0
285193	DUSP28	12.9741463414634	35.7065871559633	1.46055063052796	0	0
64718	UNKL	7.77341463414634	21.3869724770642	1.46011189338928	0	0
101928590	LOC101928590	18.4273170731707	50.6757798165138	1.45945034760727	0	0
100288069	LOC100288069	6.55772357723577	18.0326788990826	1.45934674131923	0	0
785	CACNB4	11.1458536585366	30.5742568807339	1.45581031737935	0	0
1020	CDK5	45.9227642276423	125.908293577982	1.45509192665263	0	0
9750	FAM65B	4.33585365853659	11.8677981651376	1.45266432678165	0	0
57643	ZSWIM5	4.73731707317073	12.966623853211	1.45266074975415	0	0
81894	SLC25A28	3.44642276422764	9.43	1.45215808662002	0	0
57026	PDXP	13.3138211382114	36.3325321100917	1.4483372225743	0	0
342926	ZNF677	4.5030081300813	12.2800366972477	1.44735388446712	0	0
253461	ZBTB38	18.3634959349593	50.0685137614679	1.44706289421745	0	0
121274	ZNF641	5.38666666666667	14.6651559633028	1.4449277168076	0	0
84249	PSD2	9.07016260162602	24.6663302752294	1.44334277572321	0	0
91526	ANKRD44	14.649918699187	39.8214678899083	1.4426537440093	0	0
4741	NEFM	25.0055284552846	67.9443853211009	1.44210724218648	0	0
7857	SCG2	18.2351219512195	49.5411926605505	1.44190875258065	0	0
2982	GUCY1A3	4.86008130081301	13.1877064220183	1.44014132298283	0	0
387119	CEP85L	24.7842276422764	67.1839449541284	1.43869421083647	0	0
55384	MEG3	176.41512195122	478.057908256881	1.43821115464081	0	0
7582	ZNF33B	16.5320325203252	44.7958532110092	1.43810108022935	0	0
84679	SLC9A7	6.43853658536585	17.4347889908257	1.43716418298557	0	0
169270	ZNF596	3.58056910569106	9.68748623853211	1.43593344415992	0	0
23024	PDZRN3	2.21365853658537	5.98370642201835	1.43460669488181	0	0
6547	SLC8A3	3.84024390243902	10.3712660550459	1.43332217175533	0	0
3708	ITPR1	11.2522764227642	30.3811743119266	1.43296073549557	0	0
9079	LDB2	37.0430894308943	99.9721467889908	1.43232177618824	0	0
3040	HBA2	213.50593495935	575.958495412844	1.43168867835016	0	0
84530	SRRM4	91.940406504065	247.980385321101	1.43145506126722	0	0
596	BCL2	3.45235772357724	9.31042201834862	1.43126460279957	0	0
51805	COQ3	16.2362601626016	43.7649908256881	1.43055790560528	0	1
64748	LPPR2	30.2924390243902	81.4762752293578	1.42742228477665	0	0
57156	TMEM63C	2.72065040650407	7.31581651376147	1.42706730412217	0	0
91775	NXPE3	6.91528455284553	18.5948623853211	1.42704354876884	0	0
29110	TBK1	9.94910569105691	26.7274495412844	1.4256834203309	0	0
6480	ST6GAL1	8.66853658536585	23.2863669724771	1.42562521010728	0	0
79969	ATAT1	174.887886178862	469.798568807339	1.42561195563395	0	0
11126	CD160	2.06609756097561	5.55003669724771	1.42558893093352	0	0
818	CAMK2G	13.6151219512195	36.5482018348624	1.4245905228604	0	0
81490	PTDSS2	9.29121951219512	24.9275963302752	1.42380390212048	0	0
10381	TUBB3	945.299593495935	2536.14517431193	1.42379379096345	0	0
23504	RIMBP2	10.9330081300813	29.3191926605505	1.42315497599056	1	0
57007	ACKR3	1.64422764227642	4.40477064220183	1.42165684645197	0	0
23130	ATG2A	5.43560975609756	14.5062752293578	1.41616333855326	0	0
6280	S100A9	2.16869918699187	5.78721100917431	1.41603829210311	0	0
22993	HMGXB3	5.3969918699187	14.3571009174312	1.41153704072972	0	0
6809	STX3	5.34959349593496	14.2290458715596	1.41133775170646	0	0
5593	PRKG2	7.66414634146341	20.3495412844037	1.40879926020027	0	0
10497	UNC13B	10.3740650406504	27.533504587156	1.40820693439343	0	0
65055	REEP1	56.599512195122	150.028678899083	1.40637678275351	0	0
375341	C3orf62	4.50821138211382	11.946128440367	1.40591607065524	0	0
23286	WWC1	13.6130081300813	36.0367889908257	1.40448456635287	0	0
23761	PISD	10.8074796747968	28.5955229357798	1.40375916580714	0	0
80256	FAM214B	11.9577235772358	31.6154311926606	1.40268613000872	0	0
7057	THBS1	13.1768292682927	34.7614128440367	1.39948346293583	0	0
10626	TRIM16	8.65731707317073	22.8041834862385	1.39730661070263	0	0
27244	SESN1	10.6878861788618	28.1477064220183	1.39704082207176	0	0
259217	HSPA12A	17.9616260162602	47.261119266055	1.39573583730438	0	0
139065	SLITRK4	7.86056910569106	20.6629357798165	1.39433957358385	0	0
131408	FAM131A	4.97585365853659	13.0741651376147	1.39370286376693	0	0
3399	ID3	1.49959349593496	3.93873394495413	1.39316049508091	0	0
9118	INA	51.9776422764228	136.475981651376	1.39268397494392	0	0
83448	PUS7L	17.9956097560976	47.2317431192661	1.39211179330547	0	0
9705	ST18	5.32439024390244	13.9521651376147	1.38980080044714	0	0
51195	RAPGEFL1	2.69138211382114	7.04722935779817	1.38870893377014	0	0
157627	LINC00599	57.6725203252033	150.880055045872	1.38744613190629	0	0
57224	NHSL1	45.0152032520325	117.674513761468	1.38631765291065	0	0
27197	GPR82	2.7790243902439	7.26374311926605	1.38613468644917	0	0
54707	GPN2	5.1190243902439	13.3724587155963	1.38532396433777	0	0
23087	TRIM35	2.66943089430894	6.9722752293578	1.38509731943842	0	0
26050	SLITRK5	3.85048780487805	10.0533577981651	1.38456430618179	0	0
7447	VSNL1	9.23910569105691	24.1023119266055	1.38334642203724	0	0
397	ARHGDIB	4.55016260162602	11.8696330275229	1.38328532543549	0	0
22998	LIMCH1	209.609024390244	546.786165137615	1.38327590892623	0	0
41	ASIC1	13.5777235772358	35.3477798165138	1.3803779830775	0	0
692099	FAM86DP	4.16886178861789	10.8513211009174	1.38014524717832	0	0
57688	ZSWIM6	24.6224390243902	63.9562752293578	1.37711224176051	0	0
85395	FAM207A	3.47178861788618	9.01774311926605	1.37708730271323	0	0
339804	C2orf74	7.61162601626016	19.7655779816514	1.37671355861135	0	0
79012	CAMKV	34.7472357723577	90.0863669724771	1.37441058291133	0	0
4208	MEF2C	128.790243902439	333.115541284404	1.37099935276956	0	1
643529	LINC00865	8.46756097560976	21.9009541284404	1.37097534724974	0	0
7070	THY1	39.4648780487805	102.054422018349	1.37069749946125	0	0
10127	ZNF263	4.77414634146341	12.3279816513761	1.36862192469297	0	0
3048	HBG2	203.836016260163	526.219229357798	1.36825498195583	0	0
55558	PLXNA3	27.9174796747967	72.0696697247706	1.36822352962161	1	0
23403	FBXO46	3.09439024390244	7.98752293577982	1.36809301733638	0	0
148479	PHF13	6.40154471544715	16.5207339449541	1.36778580123424	0	0
3897	L1CAM	38.2878048780488	98.7848440366973	1.36740476502322	1	0
7593	MZF1	8.41105691056911	21.6985504587156	1.36723966654166	0	0
9980	DOPEY2	34.3465040650406	88.5627889908257	1.3665373929148	0	0
23158	TBC1D9	3.78967479674797	9.7697247706422	1.36624386789216	0	0
100132074	FOXO6	1.83211382113821	4.7228623853211	1.3661523643901	1	0
149428	BNIPL	2.09276422764228	5.39269724770642	1.36559725588117	0	0
333	APLP1	64.8984552845528	167.214036697248	1.36543991413881	0	0
221322	TBC1D32	9.53869918699187	24.5713211009174	1.36511098636498	0	0
347273	MURC	11.9956910569106	30.8930825688073	1.36476756102185	0	0
22999	RIMS1	7.31756097560976	18.8414311926606	1.36447378858652	2	0
11320	MGAT4A	3.3790243902439	8.69451376146789	1.36349858332198	0	0
10773	ZBTB6	6.23162601626016	16.0328073394495	1.36334650359653	0	0
57690	TNRC6C	32.8785365853659	84.5213577981651	1.36216985722709	0	0
9399	STOML1	8.37276422764228	21.4719816513761	1.35867943848924	0	0
85442	KNDC1	2.54780487804878	6.53071559633028	1.35798628825375	0	0
114915	EPB41L4A-AS1	46.3021951219512	118.635082568807	1.35737820798732	0	0
5100	PCDH8	9.38325203252032	23.9910275229358	1.35433502735024	0	0
93611	FBXO44	11.1934146341463	28.6114311926606	1.3539414572583	0	0
84152	PPP1R1B	6.72577235772358	17.186495412844	1.35350353243597	0	0
1263	PLK3	7.24691056910569	18.5129357798165	1.3530956999217	0	0
494470	RNF165	37.7955284552846	96.5002385321101	1.35231694749964	0	0
192683	SCAMP5	22.7721951219512	58.1353027522936	1.35214114200158	0	0
6511	SLC1A6	9.72170731707317	24.8181100917431	1.35211165195343	0	0
23426	GRIP1	11.3709756097561	29.0183486238532	1.35160938060936	0	0
7571	ZNF23	9.06536585365854	23.1233394495413	1.35091261593038	0	0
55884	WSB2	39.2127642276423	99.8311376146789	1.3481665209995	0	0
55071	C9orf40	3.93040650406504	10.0019266055046	1.34752748695078	0	0
3995	FADS3	3.37788617886179	8.59084403669725	1.34667916485422	0	0
8499	PPFIA2	62.1819512195122	158.128458715596	1.34652924285406	0	0
200186	CRTC2	1.86837398373984	4.75119266055046	1.34650644760747	1	0
25943	C20orf194	25.0962601626016	63.8182568807339	1.34649681347045	1	0
79847	TMEM180	4.43430894308943	11.2693211009174	1.34561941273514	0	0
2917	GRM7	5.94479674796748	15.1059082568807	1.34541353974291	0	0
134353	LSM11	10.5854471544716	26.8826605504587	1.34459371378749	0	0
5900	RALGDS	22.0082113821138	55.8166788990826	1.34265438490615	0	0
401647	GOLGA7B	18.1386178861789	45.9986788990826	1.34252789639297	0	0
23406	COTL1	93.0344715447154	235.911633027523	1.34240928684844	0	0
343450	KCNT2	2.84723577235772	7.21875229357798	1.34218753586005	0	0
6812	STXBP1	60.2028455284553	152.613467889908	1.34197869960554	1	2+
10402	ST3GAL6	3.99577235772358	10.1292110091743	1.34197550409361	1	0
64327	LMBR1	4.82967479674797	12.2387706422018	1.34146069530044	0	0
4952	OCRL	5.70260162601626	14.4484220183486	1.34121978053061	0	0
26033	ATRNL1	3.65780487804878	9.26566972477064	1.34091714034381	0	0
2861	GPR37	2.16674796747967	5.48812844036697	1.34078289444135	0	0
22983	MAST1	28.9056097560976	73.0400183486238	1.337337621805	0	1
23125	CAMTA2	8.0809756097561	20.4171559633028	1.33718053393015	0	0
2798	GNRHR	5.65170731707317	14.2731376146789	1.33654385196691	0	0
1012	CDH13	2.46918699186992	6.23502752293578	1.33635983236621	0	0
5599	MAPK8	31.159837398374	78.6290458715596	1.33537464303986	0	0
23294	ANKS1A	7.84292682926829	19.7853577981651	1.33496910928144	0	0
5550	PREP	16.5921138211382	41.8125504587156	1.333438350657	0	0
440823	MIAT	124.642195121951	314.044862385321	1.33317812117508	1	0
51603	METTL13	8.66626016260163	21.8281467889908	1.33270819830729	0	0
144717	FAM109A	4.90691056910569	12.3588256880734	1.33265478471602	0	0
2561	GABRB2	6.07731707317073	15.302128440367	1.33222586867786	0	0
4356	MPP3	16.8690243902439	42.4520366972477	1.33145723215035	0	0
55068	ENOX1	18.2539024390244	45.928623853211	1.33118863135224	0	0
57492	ARID1B	20.5965853658537	51.7664220183486	1.32961142773792	3+	0
9794	MAML1	8.95951219512195	22.5049541284404	1.3287505327796	0	0
2892	GRIA3	35.7591056910569	89.7333394495413	1.32733344621817	0	0
1284	COL4A2	3.81975609756098	9.57684403669725	1.32606978606814	0	0
5534	PPP3R1	2.61626016260163	6.55820183486239	1.32579429222136	0	0
51617	HMP19	112.525203252033	282.056055045872	1.32573373773229	0	0
254531	LPCAT4	3.28154471544715	8.22533944954128	1.32570012641908	0	0
2059	EPS8	27.1550406504065	67.9917614678899	1.32413992328195	0	0
4858	NOVA2	1.80991869918699	4.52761467889908	1.3228262898368	0	0
56479	KCNQ5	4.8630081300813	12.1575779816514	1.32193493678212	0	0
2932	GSK3B	11.8913821138211	29.7253944954128	1.32177954991227	0	0
6709	SPTAN1	175.275203252033	437.936220183486	1.32109886720441	0	0
57468	SLC12A5	5.56837398373984	13.9033394495413	1.32010343216638	0	0
8543	LMO4	154.335691056911	385.236697247706	1.31967340696079	0	0
100129460	DPY19L1P1	2.89040650406504	7.21242201834862	1.31921140895961	0	0
84978	FRMD5	4.24276422764228	10.5778165137615	1.31796544051007	0	0
55790	CSGALNACT1	2.70089430894309	6.7274495412844	1.31662247949327	0	0
10725	NFAT5	25.9530894308943	64.6361651376147	1.31643531972009	0	0
3776	KCNK2	11.8781300813008	29.5643119266055	1.31554896326879	0	0
8916	HERC3	10.2363414634146	25.4756146788991	1.31541677769357	0	0
54993	ZSCAN2	10.2572357723577	25.5224403669725	1.31512429047056	0	1
57605	PITPNM2	1.8290243902439	4.55042201834862	1.31492603721169	0	0
57449	PLEKHG5	5.95008130081301	14.790495412844	1.3136890904372	0	0
4094	MAF	7.36252032520325	18.2873577981651	1.31257502925259	0	0
148281	SYT6	7.83121951219512	19.4193394495413	1.3101852352125	0	0
400892	BCRP2	5.06918699186992	12.5646788990826	1.30954751433581	0	0
9353	SLIT2	19.9922764227642	49.510128440367	1.30828093791316	1	0
93210	PGAP3	3.92284552845528	9.70919266055046	1.30745081063375	0	0
143279	HECTD2	13.8578861788618	34.2826055045872	1.30676954767114	0	0
80781	COL18A1	2.29105691056911	5.66581651376147	1.3062705850236	0	0
54467	ANKIB1	22.7739837398374	56.3019633027523	1.30579855429848	0	0
1496	CTNNA2	13.8822764227642	34.2834311926606	1.30426734490991	0	0
4155	MBP	1.40357723577236	3.46438532110092	1.3034909462234	0	0
147372	CCBE1	3.58439024390244	8.83506422018349	1.30151290473673	0	0
85352	KIAA1644	9.63894308943089	23.7277064220183	1.2996257841895	0	0
10486	CAP2	37.6443902439024	92.5838899082569	1.2983262877563	0	1
57084	SLC17A6	14.5338211382114	35.7405137614679	1.29814631604324	0	0
10717	AP4B1	16.1220325203252	39.6240917431193	1.29734422911452	0	0
26136	TES	8.1790243902439	20.0777614678899	1.29559775659118	0	0
84548	TMEM185A	9.65154471544716	23.6217798165138	1.29128590355602	0	0
5270	SERPINE2	34.3021951219512	83.9311559633028	1.29090554818927	0	0
23457	ABCB9	2.90186991869919	7.09656880733945	1.29013880023586	0	1
26575	RGS17	22.870081300813	55.9214678899083	1.28994073630794	0	0
7804	LRP8	21.4461788617886	52.4044587155963	1.28896894468247	0	0
2207	FCER1G	2.24983739837398	5.49447706422018	1.2881614416193	0	0
408	ARRB1	31.0059349593496	75.613504587156	1.2860995296198	0	0
286262	TPRN	5.7919512195122	14.1235412844037	1.28598051293592	0	0
29911	HOOK2	6.0520325203252	14.7547889908257	1.28569164389887	0	0
150864	FAM117B	42.6863414634146	104.043706422018	1.28534327613378	0	0
23641	LDOC1	80.5423577235772	196.283743119266	1.28512107873516	0	0
85508	SCRT2	26.8425203252033	65.4115412844037	1.28502507199786	0	0
2334	AFF2	6.12146341463415	14.9147706422018	1.28479329814377	0	0
26468	LHX6	3.81487804878049	9.29379816513761	1.28463137517442	0	0
55343	SLC35C1	6.24975609756098	15.2233394495413	1.28441307512537	0	0
9699	RIMS2	7.35284552845529	17.9066972477064	1.28412468624189	0	0
2254	FGF9	16.7722764227642	40.8343302752294	1.28370405377118	0	0
114818	KLHL29	7.40439024390244	18.014128440367	1.28267601428295	0	0
64837	KLC2	10.7251219512195	26.0865137614679	1.28231010108901	0	0
283638	CEP170B	6.83642276422764	16.6255963302752	1.28209256730768	0	0
145483	FAM161B	7.37252032520325	17.914752293578	1.28091829585941	0	0
54511	HMGCLL1	5.43138211382114	13.1956513761468	1.28067129827556	0	0
55531	ELMOD1	34.1286178861789	82.8963853211009	1.28032720419317	0	0
79947	DHDDS	8.60414634146341	20.8974495412844	1.28022290949931	0	2+
57692	MAGEE1	2.58284552845528	6.27154128440367	1.27985867796736	0	0
6456	SH3GL2	19.7655284552846	47.9002201834862	1.27704575976118	0	0
79762	C1orf115	1.02479674796748	2.47867889908257	1.27423358670078	0	0
401115	C4orf48	839.189349593496	2029.02847706422	1.27372083974861	0	0
10472	ZBTB18	124.161219512195	300.054128440367	1.27300814714991	0	0
9889	ZBED4	20.1734959349593	48.7194862385321	1.27203780444159	0	0
23217	ZFR2	10.3191056910569	24.9179266055046	1.2718660837143	0	0
22874	PLEKHA6	5.89455284552846	14.2276330275229	1.27124138748003	0	0
8527	DGKD	17.1473170731707	41.3841834862385	1.27109662804367	1	0
23331	TTC28	74.5960162601626	180.005229357798	1.27086832741475	0	0
1378	CR1	1.3080487804878	3.15640366972477	1.27086537853584	0	0
10807	SDCCAG3	9.05544715447154	21.8322752293578	1.2696046994568	1	0
384	ARG2	13.1405691056911	31.6225137614679	1.26692429731261	0	0
7025	NR2F1	10.3065040650407	24.7980550458716	1.26667191410094	0	0
53335	BCL11A	289.553902439024	696.658899082569	1.26662051008607	2	0
9935	MAFB	3.34308943089431	8.04177981651376	1.26633288680139	0	0
128434	VSTM2L	54.37	130.763889908257	1.26608146628241	0	0
79608	RIC3	8.69357723577236	20.9069541284404	1.26596105040444	0	0
4300	MLLT3	178.618699186992	429.278642201835	1.26503127566709	0	0
10397	NDRG1	23.1306504065041	55.5892844036697	1.26500097708917	0	0
3746	KCNC1	3.24130081300813	7.78915596330275	1.26489408762476	0	0
91661	ZNF765	2.68430894308943	6.44603669724771	1.26386167759841	0	0
127703	C1orf216	9.44666666666667	22.6622935779817	1.26241662154648	0	0
5891	MOK	28.6352845528455	68.6519633027523	1.26150703922951	0	0
219287	AMER2	112.332113821138	269.272678899083	1.26129742927597	0	0
9829	DNAJC6	10.0752845528455	24.1133394495413	1.25901087832824	0	0
84669	USP32	12.7039837398374	30.3762935779817	1.2576648763107	0	0
8036	SHOC2	23.8611382113821	56.9879816513761	1.25599483417085	0	0
7172	TPMT	3.89951219512195	9.30768807339449	1.25512919978831	0	0
353088	ZNF429	10.6647967479675	25.4497798165138	1.25479670386909	0	0
83874	TBC1D10A	7.24739837398374	17.2904403669725	1.25443950970183	0	0
54916	TMEM260	7.57983739837398	18.0708440366972	1.25342508652999	0	0
10085	EDIL3	11.4123577235772	27.1994495412844	1.25298058028272	0	0
140290	TCP10L	2.64024390243902	6.28979816513761	1.2523425127468	0	0
728215	FAM155A	21.3252845528455	50.7790458715596	1.25166829507999	0	0
644353	ZCCHC18	5.16951219512195	12.2879266055046	1.24914144746916	0	0
5362	PLXNA2	98.4737398373984	233.91023853211	1.24814405658	0	0
83992	CTTNBP2	93.5477235772358	221.903798165138	1.24615990933876	0	0
25977	NECAP1	25.1336585365854	59.6073944954128	1.24587062304611	0	0
23140	ZZEF1	4.15422764227642	9.8476880733945	1.24520479024857	0	0
26504	CNNM4	4.35260162601626	10.3161467889908	1.24495431865434	0	0
144404	TMEM120B	5.08276422764228	12.0458348623853	1.24484917043668	0	0
149111	CNIH3	9.13609756097561	21.6507339449541	1.24476597025074	0	0
4929	NR4A2	12.399918699187	29.3169908256881	1.24140636746888	0	0
57489	ODF2L	22.980325203252	54.2919449541284	1.24033895363631	0	0
1141	CHRNB2	4.96512195121951	11.7245137614679	1.23962703442922	0	0
5121	PCP4	9.27552845528455	21.9014128440367	1.2395225560788	0	0
6253	RTN2	9.58569105691057	22.6303486238532	1.23930446138605	0	0
23276	KLHL18	10.4317886178862	24.6092660550459	1.23821509034252	0	0
122830	NAA30	8.46455284552846	19.9637247706422	1.23787515699738	0	0
253559	CADM2	26.3615447154472	62.1145871559633	1.23649720373872	0	0
6714	SRC	7.82577235772358	18.4368990825688	1.23629097838505	0	0
54784	ALKBH4	15.2720325203252	35.9736697247706	1.2360492583975	0	0
51466	EVL	62.089593495935	146.185504587156	1.23537687268074	0	0
81539	SLC38A1	118.82487804878	279.615651376147	1.23460819627327	0	0
10900	RUNDC3A	23.9682926829268	56.3839266055046	1.2341568052944	0	0
101926964	LOC101926964	5.56869918699187	13.0958532110092	1.23369778854364	0	0
2274	FHL2	4.56983739837398	10.7428990825688	1.23316863399237	0	0
283209	PGM2L1	92.3412195121951	216.998275229358	1.23263688501982	0	0
92799	SHKBP1	14.2857723577236	33.5700550458716	1.23259586523786	0	0
9172	MYOM2	6.11073170731707	14.3513394495413	1.23176834807231	0	0
5138	PDE2A	4.78284552845528	11.2308073394495	1.23152053877907	0	0
22878	TRAPPC8	8.52219512195122	19.9880183486239	1.22983845897853	0	0
6655	SOS2	12.2435772357724	28.712495412844	1.2296535857728	0	0
146713	RBFOX3	18.2656910569106	42.8323669724771	1.22956506755753	0	0
25893	TRIM58	1.75008130081301	4.1002752293578	1.22829880865612	0	0
54206	ERRFI1	3.34512195121951	7.836	1.22805859026267	0	0
10723	SLC12A7	5.38658536585366	12.6162568807339	1.22784101773544	0	0
440348	NPIPB15	7.35691056910569	17.2275596330275	1.22754639220102	0	0
146705	ENTHD2	3.99422764227642	9.35222018348624	1.22739233790512	0	0
9912	ARHGAP44	4.31032520325203	10.0866422018349	1.22657736136199	1	0
149175	MANEAL	11.6686178861789	27.3011926605505	1.22633028893784	0	0
1400	CRMP1	261.86487804878	612.419266055046	1.22569709428145	0	0
84033	OBSCN	15.9719512195122	37.3424770642202	1.22527705911534	0	0
11062	DUS4L	4.26626016260163	9.96939449541284	1.22453393730717	0	0
57611	ISLR2	6.28317073170732	14.6816513761468	1.22444956219685	0	0
8848	TSC22D1	303.369837398374	708.583541284404	1.22386030296359	0	0
8906	AP1G2	6.02967479674797	14.0801100917431	1.22350651507068	1	0
65268	WNK2	22.2021138211382	51.8394862385321	1.22335438091806	0	0
115207	KCTD12	18.3028455284553	42.7212660550459	1.22288644170822	0	0
781	CACNA2D1	39.6889430894309	92.5945688073394	1.22219042968444	0	0
6723	SRM	119.095203252033	277.813834862385	1.22200313839283	0	0
79699	ZYG11B	29.4451219512195	68.6767155963303	1.22179239669803	0	0
84331	FAM195A	8.79065040650406	20.4958899082569	1.22129281432757	0	0
50512	PODXL2	24.8614634146341	57.9577614678899	1.22109065410827	0	0
432	ASGR1	16.0611382113821	37.4391009174312	1.22097165313846	0	0
27345	KCNMB4	13.2569918699187	30.8904036697248	1.22040527177291	0	0
1428	CRYM	39.4285365853659	91.8525688073395	1.22007990431105	0	0
50650	ARHGEF3	11.0130081300813	25.6497981651376	1.21973888819528	0	0
11120	BTN2A1	10.9986991869919	25.6092844036697	1.21933403378184	0	0
387712	ENO4	5.51894308943089	12.849871559633	1.21929002524229	0	0
58492	ZNF77	4.25121951219512	9.89075229357798	1.21820350235383	0	0
402665	IGLON5	4.89219512195122	11.3523853211009	1.21444161204038	0	0
51527	GSKIP	14.9580487804878	34.6768073394495	1.21304908359841	0	0
6861	SYT5	6.63918699186992	15.3823486238532	1.21219730432184	0	0
118429	ANTXR2	8.27536585365854	19.1716880733945	1.21208237242446	0	0
5817	PVR	5.98333333333333	13.8605504587156	1.21196321056135	0	0
11279	KLF8	1.80569105691057	4.18106422018349	1.21131912569542	0	0
79605	PGBD5	6.95089430894309	16.0945688073394	1.21130341235257	0	0
79944	L2HGDH	14.0887804878049	32.6183669724771	1.21113781715402	0	0
154215	NKAIN2	17.7513821138211	41.0893944954128	1.21083471420048	0	0
4330	MN1	149.463983739837	345.472587155963	1.2087733581858	0	0
10391	CORO2B	26.9008943089431	62.1722018348624	1.20861553760158	1	0
9026	HIP1R	43.059756097561	99.5113944954128	1.20852158238459	0	0
148014	TTC9B	46.7766666666667	108.037889908257	1.20767640475662	0	0
81706	PPP1R14C	11.9220325203252	27.5255963302752	1.20714360576115	0	0
81553	FAM49A	26.6865853658537	61.6005504587156	1.2068285229781	0	0
51555	PEX5L	4.7980487804878	11.0734311926605	1.20658259186065	0	0
1	A1BG	4.22983739837398	9.74932110091743	1.20469955459834	0	0
1943	EFNA2	14.7347154471545	33.9360183486239	1.2035981062279	0	0
10817	FRS3	1.88032520325203	4.33016513761468	1.20343984706809	0	0
7620	ZNF69	12.3026829268293	28.3311376146789	1.20341556531711	0	0
203523	ZNF449	6.0560162601626	13.940128440367	1.20280286982791	0	0
1540	CYLD	9.34365853658537	21.4917431192661	1.20172304230875	0	0
100507341	SMIM18	30.6628455284553	70.4686055045872	1.20048907894147	0	0
89845	ABCC10	4.9349593495935	11.3396146788991	1.20026151217998	0	0
136051	ZNF786	7.04341463414634	16.1837614678899	1.20020004190869	0	0
2784	GNB3	3.78422764227642	8.69242201834862	1.19975934187858	0	0
9267	CYTH1	20.9329268292683	48.0708990825688	1.19938974437813	0	0
124925	SEZ6	46.1860162601626	106.023541284404	1.19885661577934	0	0
10777	ARPP21	136.526178861789	313.239926605505	1.19809050097372	0	0
22920	KIFAP3	105.238455284553	241.364128440367	1.19754930100495	0	0
6035	RNASE1	4.11447154471545	9.43403669724771	1.19716806738207	0	0
55959	SULF2	5.6790243902439	13.0183669724771	1.1968334748239	0	0
27242	TNFRSF21	12.5815447154472	28.841376146789	1.19683094159699	0	0
92714	ARRDC1	5.86455284552846	13.4414128440367	1.19659177318857	0	0
9856	KIAA0319	4.12252032520325	9.44025688073394	1.19529951100788	0	0
2036	EPB41L1	12.0828455284553	27.6609908256881	1.19489258367255	0	0
441151	TMEM151B	21.4525203252033	49.0589357798165	1.19336878721673	0	0
374659	HDDC3	4.51032520325203	10.3137431192661	1.1932646549323	0	0
2835	GPR12	16.319593495935	37.2675963302752	1.19131665000341	0	0
57799	RAB40C	11.9544715447154	27.2987706422018	1.19128562689923	0	0
54331	GNG2	109.35081300813	249.680880733945	1.19112140473329	0	0
80739	C6orf25	3.55918699186992	8.12464220183486	1.19075654923614	0	0
773	CACNA1A	12.5539024390244	28.6258348623853	1.18918186715015	0	2+
23135	KDM6B	40.3623577235772	92.0241651376147	1.18900230585898	3+	0
2651	GCNT2	5.47284552845528	12.472752293578	1.18841680983018	0	0
79712	GTDC1	14.7546341463415	33.5935779816514	1.18701731381678	0	0
100129550	LOC100129550	8.27414634146341	18.8375779816514	1.18693110486727	0	0
9853	RUSC2	7.96975609756098	18.1339816513761	1.18608825178284	0	0
6830	SUPT6H	11.1712195121951	25.3933577981651	1.18466449012321	0	0
1140	CHRNB1	19.9360975609756	45.2769357798165	1.18339329020056	0	0
54832	VPS13C	37.6069918699187	85.3886055045872	1.18304265355245	0	0
10123	ARL4C	40.2337398373984	91.3088440366973	1.18234875754869	0	0
6263	RYR3	4.1260162601626	9.35207339449541	1.18053674536243	0	1
56475	RPRM	17.3345528455285	39.258623853211	1.17935898048114	0	0
89853	MVB12B	15.2358536585366	34.4882385321101	1.17863410993007	0	0
5662	PSD	4.60642276422764	10.4247339449541	1.1782918356512	0	0
54861	SNRK	15.2545528455285	34.4999816513761	1.17735570357354	0	0
288	ANK3	139.085772357724	314.466550458716	1.17693171865529	0	1
637	BID	68.4732520325203	154.724568807339	1.17608986362325	0	0
6695	SPOCK1	30.3744715447154	68.6082568807339	1.17552290369123	0	0
93627	TBCK	15.8947154471545	35.8966055045872	1.17530023567037	0	0
3899	AFF3	87.7381300813008	198.120293577982	1.17510079953369	0	0
55620	STAP2	4.60552845528455	10.389871559633	1.17373920858287	0	0
56938	ARNTL2	1.46577235772358	3.30416513761468	1.17262472984405	0	0
63891	RNF123	4.98382113821138	11.2285137614679	1.17184278282561	0	0
9537	TP53I11	19.8793495934959	44.749871559633	1.17061298556707	0	0
338699	ANKRD42	4.2919512195122	9.6571376146789	1.16996195702662	0	0
22853	LMTK2	3.97479674796748	8.93840366972477	1.16913611037313	0	0
55351	STK32B	8.00178861788618	17.9858348623853	1.16846670488784	0	0
54726	OTUD4	10.4752845528455	23.5267706422018	1.16731387120809	0	0
2912	GRM2	5.28560975609756	11.8708990825688	1.16728738864402	0	0
1534	CYB561	4.14252032520325	9.29882568807339	1.1665397594499	0	0
124454	EARS2	4.53772357723577	10.1814678899083	1.16590494097552	0	0
8310	ACOX3	7.48894308943089	16.7964036697248	1.16531833476664	0	0
56122	PCDHB14	6.43162601626016	14.4126422018349	1.16407941746126	0	0
283254	HARBI1	4.25065040650407	9.52374311926605	1.16384509797714	0	0
1641	DCX	333.524552845528	747.072697247706	1.16345566653546	0	0
5621	PRNP	29.529593495935	66.1427155963303	1.16342078244264	0	1
6609	SMPD1	5.39146341463415	12.0752844036697	1.16330834403867	0	0
26249	KLHL3	5.38544715447154	12.0556146788991	1.16256716938347	0	0
5613	PRKX	56.5026829268293	126.421357798165	1.16184893698184	0	1
80127	CCDC176	7.09048780487805	15.8498165137615	1.16050934982374	0	0
164091	PAQR7	1.27829268292683	2.85660550458716	1.16008361551267	0	0
84467	FBN3	13.939674796748	31.0965688073394	1.1575584978015	0	0
114900	C1QTNF4	48.6843902439024	108.580128440367	1.15722891767816	0	0
123096	SLC25A29	30.1859349593496	67.2905871559633	1.15652822275938	0	0
55288	RHOT1	22.8509756097561	50.8945321100917	1.15525490600396	0	0
205147	AMER3	9.11211382113821	20.2942018348624	1.1552099271212	0	0
55252	ASXL2	6.49463414634146	14.4609908256881	1.15484624137125	0	0
7464	CORO2A	5.87073170731707	13.0665137614679	1.15426203912468	0	0
157922	CAMSAP1	33.8278048780488	75.2571376146789	1.15361885575924	0	0
211	ALAS1	31.7047967479675	70.528623853211	1.15350776218614	0	0
151507	MSL3P1	2.35227642276423	5.23137614678899	1.15313290113164	0	0
29114	TAGLN3	248.1	551.621926605505	1.15275806893176	0	0
55131	RBM28	20.3870731707317	45.2973394495413	1.15177164310872	0	0
65250	C5orf42	21.46	47.6624036697248	1.15120163403528	0	0
51090	PLLP	1.52772357723577	3.39216513761468	1.15082287590041	0	0
163255	ZNF540	5.31008130081301	11.7882018348624	1.15053781236193	0	0
132946	ARL9	9.43894308943089	20.9512844036697	1.15034145976308	0	0
400720	ZNF772	10.930325203252	24.2594495412844	1.15021049010949	0	0
1831	TSC22D3	10.6404878048781	23.6033394495413	1.14942669793588	0	0
65012	SLC26A10	2.64008130081301	5.85374311926606	1.14877707932791	0	0
54758	KLHDC4	29.3777235772358	65.133504587156	1.14867724613044	0	0
7345	UCHL1	980.017642276423	2169.99708256881	1.14681347708528	0	0
25789	TMEM59L	37.3381300813008	82.6315963302752	1.14604386070851	0	0
26094	DCAF4	6.29040650406504	13.9201834862385	1.14595307161013	0	0
170960	ZNF721	18.0852032520325	40.0132660550459	1.14566858053956	0	0
357	SHROOM2	5.10634146341463	11.2950275229358	1.14532586642614	0	0
84456	L3MBTL3	11.2961788617886	24.9825688073395	1.14508699093746	0	0
26056	RAB11FIP5	3.36422764227642	7.43192660550459	1.14346092472475	0	0
79629	OCEL1	5.38528455284553	11.8940917431193	1.14315062645593	0	0
23170	TTLL12	10.5445528455285	23.2672110091743	1.14180037113086	0	0
1749	DLX5	6.94626016260163	15.3130642201835	1.14045465116765	0	0
784	CACNB3	37.9045528455285	83.5177247706422	1.13971126402088	0	0
1107	CHD3	77.5186178861789	170.796770642202	1.1396659436638	0	0
6405	SEMA3F	6.30821138211382	13.8973577981651	1.13950771070538	0	0
1826	DSCAM	9.91138211382114	21.8344587155963	1.13944861037134	2	0
25854	FAM149A	9.67569105691057	21.2956513761468	1.13812224851619	0	0
753	LDLRAD4	15.3621951219512	33.7813577981651	1.13684293741025	0	0
57704	GBA2	8.36674796747968	18.384623853211	1.13576077712348	0	0
23759	PPIL2	5.29536585365854	11.6274128440367	1.13472785813773	0	0
55321	TMEM74B	3.42552845528455	7.52106422018349	1.13461024631035	0	0
9778	KIAA0232	21.9380487804878	48.1286972477064	1.13346215792252	1	0
84705	GTPBP3	13.1049593495935	28.7440550458716	1.13315072470399	0	0
54823	SWT1	7.94650406504065	17.4294311926606	1.13313327314911	0	0
55313	CPPED1	10.2040650406504	22.3794862385321	1.13303291721589	0	0
100125288	ZGLP1	5.82471544715447	12.7699082568807	1.13248868318348	0	0
85456	TNKS1BP1	11.6378861788618	25.5071743119266	1.13207404445917	0	0
6659	SOX4	2851.81455284553	6249.73166972477	1.13191407986013	0	0
9839	ZEB2	138.418455284553	303.300110091743	1.1317097118034	0	0
7566	ZNF18	5.6030081300813	12.2697247706422	1.1308293963665	0	0
23742	NPAP1	1.66813008130081	3.65099082568807	1.13005624855713	0	0
84866	TMEM25	15.9005691056911	34.7972844036697	1.12989631917597	0	0
79834	PEAK1	3.54609756097561	7.75981651376147	1.12979031078233	0	0
286205	SCAI	16.9274796747967	37.0387706422018	1.12966902777163	0	0
10142	AKAP9	354.764634146341	775.482513761468	1.12823205340324	1	0
81606	LBH	14.5864227642276	31.8820183486239	1.12811685060488	0	0
147906	DACT3	4.82642276422764	10.5440366972477	1.12740109939552	0	0
23154	NCDN	27.1890243902439	59.3870091743119	1.12712299319538	0	0
8620	NPFF	2.75227642276423	6.01047706422018	1.12685413194144	0	0
84926	SPRYD3	6.45951219512195	14.1056330275229	1.1267742864046	0	0
9911	TMCC2	10.0239024390244	21.8821100917431	1.12630758558274	0	0
7379	UPK2	4.86975609756098	10.625743119266	1.125642319092	0	0
84914	ZNF587	18.0574796747967	39.3972293577982	1.12549762804069	0	0
9378	NRXN1	200.913658536585	438.179596330275	1.12494666246132	0	0
26259	FBXW8	2.80024390243902	6.09921100917431	1.12307013645383	0	0
3875	KRT18	1.36325203252033	2.96801834862385	1.1224477044661	0	0
351	APP	16.0418699186992	34.8894862385321	1.12095003426002	0	0
1804	DPP6	28.8926016260163	62.8177798165138	1.12047283757036	0	0
5140	PDE3B	3.33991869918699	7.25992660550459	1.12014197849321	0	0
29998	GLTSCR1	9.74813008130081	21.186128440367	1.11992256530155	0	0
56907	SPIRE1	53.6460162601626	116.567412844037	1.11962158450151	0	0
8440	NCK2	18.560406504065	40.2988073394495	1.11850883394912	0	0
2744	GLS	15.9526016260163	34.6239816513761	1.11797991500128	0	0
8189	SYMPK	3.31252032520325	7.17684403669725	1.11542026239658	0	0
8936	WASF1	67.2734959349594	145.685834862385	1.11475047362331	0	0
9063	PIAS2	15.2279674796748	32.9665871559633	1.11428114664684	0	0
158427	TSTD2	12.4852032520325	27.0236513761468	1.11400331389008	0	0
23389	MED13L	31.9987804878049	69.2535412844037	1.11387092204536	1	0
8804	CREG1	9.36048780487805	20.2513211009174	1.11336040538361	0	0
257019	FRMD3	10.74	23.2339449541284	1.11324014070088	0	0
4784	NFIX	64.0791869918699	138.587467889908	1.11286905544798	0	0
2785	GNG3	76.4967479674797	165.392256880734	1.11242137155509	0	0
10740	RFPL1S	28.7009756097561	62.015376146789	1.11152618479044	0	0
63925	ZNF335	6.24975609756098	13.5035963302752	1.11147188910704	0	0
3398	ID2	607.909837398374	1313.32568807339	1.1112954603723	0	0
116842	LEAP2	6.40073170731707	13.8269724770642	1.111176558725	0	0
3164	NR4A1	3.10430894308943	6.70537614678899	1.11104612152058	0	0
23221	RHOBTB2	5.06365853658537	10.9329908256881	1.11043609195176	0	1
80179	MYO19	3.41682926829268	7.37706422018349	1.11038863376677	0	0
9422	ZNF264	24.399593495935	52.6697614678899	1.11011781350919	0	0
10653	SPINT2	21.2340650406504	45.8350458715596	1.11007053070579	0	0
340533	KIAA2022	10.8693495934959	23.4570091743119	1.10975346385013	1	0
794	CALB2	8.06154471544715	17.3969541284404	1.10970652724895	0	0
26960	NBEA	86.6861788617886	187.023944954128	1.10934909696815	1	0
3122	HLA-DRA	1.37520325203252	2.96379816513761	1.10780234178833	0	0
80003	PCNXL2	14.4822764227642	31.1513211009174	1.10500495514067	0	0
64847	SPATA20	3.54	7.61260550458716	1.10464095744172	0	0
129563	DIS3L2	10.9565040650407	23.5611009174312	1.10461940687349	0	0
7692	ZNF133	14.8039024390244	31.8151376146789	1.10373582879926	0	0
133746	JMY	11.8241463414634	25.4026422018349	1.10324253344807	0	0
9727	RAB11FIP3	2.70073170731707	5.8011376146789	1.10298551479054	0	0
55362	TMEM63B	2.71406504065041	5.82566972477064	1.10196861861606	0	0
23023	TMCC1	18.2067479674797	39.0599633027523	1.10121733815952	0	0
253980	KCTD13	24.8225203252033	53.2337247706422	1.10069091011712	0	0
130507	UBR3	14.0443089430894	30.1117981651376	1.10034322532908	1	0
5912	RAP2B	35.0260975609756	75.0320550458716	1.09907681365592	0	0
23028	KDM1A	42.8283739837398	91.7320550458716	1.09885905526717	0	0
84707	BEX2	167.664227642276	358.796201834862	1.09758970570842	0	0
79703	C11orf80	12.3645528455285	26.4525688073394	1.09719776244636	0	0
4915	NTRK2	5.68674796747967	12.1628256880734	1.09680266542574	0	0
6546	SLC8A1	25.3156910569106	54.1354678899083	1.09654224628741	0	1
51363	CHST15	2.97813008130081	6.36842201834862	1.09652917204511	0	0
9945	GFPT2	4.78308943089431	10.2262752293578	1.0962660890658	0	0
10955	SERINC3	34.1787804878049	73.0531009174312	1.09584459103429	0	0
21	ABCA3	14.4886178861789	30.9646422018349	1.09570179738872	1	0
55187	VPS13D	9.48585365853659	20.264880733945	1.09513216787575	0	0
9743	ARHGAP32	23.4983739837398	50.1985504587156	1.09508477516747	0	0
84984	CEP19	8.78227642276423	18.7386605504587	1.09335098284567	0	0
23017	FAIM2	30.7893495934959	65.6423302752294	1.09219506319134	0	0
94235	GNG8	6.77650406504065	14.4167339449541	1.08913126710566	0	0
57037	ANKMY2	20.6539837398374	43.9179082568807	1.0883892671451	0	0
27020	NPTN	14.4880487804878	30.8017981651376	1.08815126697563	0	0
4355	MPP2	9.24715447154471	19.6556880733945	1.08786547425845	0	0
113146	AHNAK2	5.5409756097561	11.7695779816514	1.08685066928661	0	0
2742	GLRA2	36.0329268292683	76.5349357798165	1.08680260123057	0	0
4134	MAP4	60.0778048780488	127.595541284404	1.08667391049823	0	0
90362	FAM110B	66.2411382113821	140.619669724771	1.08599904334975	0	0
3842	TNPO1	39.309512195122	83.3286422018349	1.08393401131374	0	0
7532	YWHAG	65.5155284552846	138.870073394495	1.08382693185031	0	1
6621	SNAPC4	8.58934959349594	18.200752293578	1.0833772864953	0	0
8507	ENC1	359.76918699187	761.996568807339	1.08271287147151	0	0
5566	PRKACA	13.0786178861789	27.6889908256881	1.08210238440018	0	0
8604	SLC25A12	14.4214634146341	30.5115596330275	1.08113835764753	0	1
9859	CEP170	122.770081300813	259.743064220183	1.08112620302868	0	0
905	CCNT2	21.5382113821138	45.5499633027523	1.08055144394384	1	0
23114	NFASC	24.7010569105691	52.1714311926605	1.07868723736871	0	1
134957	STXBP5	12.8352032520325	27.1014862385321	1.07826582886263	1	0
22849	CPEB3	6.39040650406504	13.4920917431193	1.0781344221339	0	0
101929550	LOC101929550	2.40894308943089	5.08585321100917	1.07808951251922	0	0
64919	BCL11B	104.380406504065	220.341504587156	1.07789034804069	0	0
9306	SOCS6	11.5372357723577	24.3304587155963	1.07646591304647	0	0
23025	UNC13A	15.9465853658537	33.6274862385321	1.07639340334486	0	0
90701	SEC11C	165.164471544715	348.238587155963	1.07617268942182	0	0
728233	PI4KAP1	2.07991869918699	4.38451376146789	1.07588972124639	0	0
90102	PHLDB2	1.32536585365854	2.79374311926606	1.07580871724515	0	0
54802	TRIT1	9.18349593495935	19.3545137614679	1.07555470117725	0	0
440193	CCDC88C	12.2016260162602	25.7032660550459	1.07487827361458	0	0
151473	SLC16A14	13.5856910569106	28.6181651376147	1.07484322388571	0	0
7189	TRAF6	8.98707317073171	18.9288073394495	1.07466025963334	0	0
6310	ATXN1	13.2017886178862	27.774128440367	1.07300823669217	0	0
78986	DUSP26	25.6547154471545	53.9375229357798	1.07206524400166	0	0
3104	ZBTB48	11.8216260162602	24.8466422018349	1.07162241186051	0	0
83732	RIOK1	28.2491869918699	59.3713944954128	1.07155865150276	0	0
79573	TTC13	11.0885365853659	23.3014128440367	1.07134845531481	0	0
9927	MFN2	18.2069918699187	38.2450091743119	1.07077891173295	0	0
6863	TAC1	3.29910569105691	6.92721100917431	1.07019962309299	0	0
307	ANXA4	2.38878048780488	5.01561467889908	1.07015223204045	0	0
57540	PTCHD2	27.9939024390244	58.7762568807339	1.07012086781921	0	0
54842	MFSD6	8.29455284552846	17.407376146789	1.06946264513934	0	0
56654	NPDC1	98.4446341463415	206.390972477064	1.0679953913867	0	0
55022	PID1	29.3471544715447	61.4969908256881	1.06729519313043	0	0
388228	SBK1	101.883739837398	213.458788990826	1.06703374301975	0	0
339483	MTMR9LP	7.7530081300813	16.2341834862385	1.06620674182723	0	0
284047	CCDC144B	26.9960162601626	56.527247706422	1.06619992654008	0	0
23762	OSBP2	3.64048780487805	7.62207339449541	1.06605172382814	0	0
113802	HENMT1	8.51430894308943	17.8260917431193	1.06602909134136	0	0
6990	DYNLT3	10.6217073170732	22.2295412844037	1.0654624966878	0	0
253260	RICTOR	13.8906504065041	29.0597431192661	1.06490779728365	0	0
51303	FKBP11	3.24821138211382	6.79482568807339	1.06479102003512	0	0
100133941	CD24	334.409430894309	699.08704587156	1.06385656763526	0	0
9649	RALGPS1	18.4688617886179	38.568495412844	1.06232790871919	0	1
163126	EID2	8.23967479674797	17.2061100917431	1.06226167046675	0	0
8522	GAS7	12.5015447154472	26.0721651376147	1.06040402691837	0	0
51755	CDK12	13.5155284552846	28.1847706422018	1.06029790522856	0	0
8559	PRPF18	17.2037398373984	35.87	1.06005552581102	0	0
5530	PPP3CA	31.0626016260163	64.7389908256881	1.05945620980278	0	0
79794	C12orf49	11.7757723577236	24.5223669724771	1.0582765515574	0	0
23078	VWA8	3.34170731707317	6.9588623853211	1.05826609703394	0	0
55054	ATG16L1	10.2254471544715	21.2904770642202	1.05804434420685	0	0
5873	RAB27A	3.42715447154472	7.13412844036697	1.05772597014992	0	0
55800	SCN3B	70.5869105691057	146.86128440367	1.0569815382593	0	0
283987	HID1	9.40674796747967	19.5693211009174	1.0568257506232	0	0
57563	KLHL8	21.7719512195122	45.286128440367	1.05659849832286	0	0
54873	PALMD	67.9007317073171	141.228018348624	1.05652730818033	0	0
23043	TNIK	45.3750406504065	94.3242385321101	1.05572961279937	0	0
5334	PLCL1	8.8860162601626	18.4632844036697	1.05505052809772	0	0
59353	TMEM35	42.5980487804878	88.4992110091743	1.05487724451466	0	0
79140	CCDC28B	81.3733333333333	169.035027522936	1.05469423867171	0	0
79633	FAT4	16.5621951219512	34.3849174311927	1.0538819836646	0	0
51439	FAM8A1	9.67373983739837	20.0772844036697	1.05341850364139	1	0
5423	POLB	57.1139837398374	118.48295412844	1.0527635946247	0	0
220064	ORAOV1	5.22276422764228	10.8269174311927	1.05173706435072	0	0
54896	PQLC2	9.15975609756098	18.9818532110092	1.05123976209444	0	0
10277	UBE4B	15.7284552845528	32.582880733945	1.05073717333481	0	0
64130	LIN7B	30.1770731707317	62.4987339449541	1.05037407716551	0	0
4739	NEDD9	26.7326829268293	55.3610458715596	1.05026656278599	1	1
114793	FMNL2	42.3561788617886	87.6963853211009	1.04994493543763	0	0
55609	ZNF280C	7.60235772357724	15.735504587156	1.04950462507355	0	0
8526	DGKE	5.1639837398374	10.6873577981651	1.04934886112631	0	0
84498	FAM120B	11.8548780487805	24.5337247706422	1.04928546216434	0	0
8187	ZNF239	10.3652845528455	21.45	1.04921792516614	0	0
9447	AIM2	5.4179674796748	11.2114678899083	1.04915153984775	0	0
1803	DPP4	6.08739837398374	12.5903669724771	1.048422646573	1	0
929	CD14	1.42447154471545	2.94612844036697	1.04839352531179	0	0
60680	CELF5	67.0123577235772	138.525155963303	1.04764891928572	0	0
6664	SOX11	674.922276422764	1394.79060550459	1.04725527501834	0	0
84503	ZNF527	5.80813008130081	11.9985688073394	1.04671666101882	0	0
26297	SERGEF	19.9148780487805	41.136623853211	1.04657674928484	0	0
11237	RNF24	94.4165853658537	194.969082568807	1.0461331521597	0	0
60412	EXOC4	29.9660162601626	61.8646788990826	1.04578864834604	0	0
5521	PPP2R2B	191	393.985651376147	1.04457045064544	0	0
387254	SLC7A5P2	10.3631707317073	21.3606605504587	1.04349078140428	0	0
80055	PGAP1	63.4092682926829	130.642422018349	1.04285780864629	0	0
2043	EPHA4	18.5573170731707	38.2215596330275	1.04239850107881	0	0
7067	THRA	26.2353658536585	54.0173577981651	1.04191016508823	0	0
9294	S1PR2	4.07016260162602	8.37911926605505	1.04171217858133	0	0
80758	PRR7	2.4179674796748	4.9777247706422	1.04169162147304	0	0
586	BCAT1	10.3330081300813	21.2657247706422	1.04126971460476	0	0
55084	SOBP	59.7362601626016	122.883908256881	1.04061718155822	0	0
10100	TSPAN2	16.8337398373984	34.6276880733945	1.040570342827	0	0
24145	PANX1	7.57325203252033	15.5734128440367	1.04010029275341	0	0
157869	SBSPON	2.86780487804878	5.89689908256881	1.04000963643641	0	0
6543	SLC8A2	3.41365853658537	7.01776146788991	1.03969215685133	0	0
7290	HIRA	7.53439024390244	15.4889174311927	1.03967364843613	0	0
10133	OPTN	50.0985365853659	102.977963302752	1.03949527494159	0	0
84067	FAM160A2	4.88081300813008	10.0235596330275	1.03820155305218	0	0
80741	LY6G5C	3.65170731707317	7.49875229357798	1.03807942915285	0	0
11179	ZNF277	24.2321951219512	49.7206972477064	1.03692142773161	0	0
23094	SIPA1L3	2.47512195121951	5.07706422018349	1.03649489927454	0	0
7766	ZNF223	11.7921138211382	24.1759633027523	1.03575102076464	0	0
387509	GPR153	15.7936585365854	32.3783486238532	1.0356840021551	0	0
51761	ATP8A2	5.77723577235772	11.8357614678899	1.03470124835455	0	0
5549	PRELP	1.64146341463415	3.3617247706422	1.03421901873643	0	0
5295	PIK3R1	5.83365853658537	11.9400550458716	1.03333663962373	0	0
10458	BAIAP2	24.339512195122	49.8112660550459	1.03317182621774	0	0
81619	TSPAN14	49.9681300813008	102.215229357798	1.03253002847528	0	0
90987	ZNF251	5.89292682926829	12.053871559633	1.03244033941416	0	0
6653	SORL1	28.1779674796748	57.6279633027523	1.03220148107444	0	0
440465	BAIAP2-AS1	22.9226829268293	46.8504036697248	1.03128556787257	0	0
79095	C9orf16	253.61674796748	518.338697247706	1.03124508482946	0	0
117145	THEM4	5.44121951219512	11.117871559633	1.03087868385552	0	0
85378	TUBGCP6	12.0838211382114	24.6266055045872	1.02714104764435	0	0
885	CCK	3.46357723577236	7.05864220183486	1.02712784836784	0	0
10565	ARFGEF1	22.2752032520325	45.3822018348624	1.02668801098464	0	0
9143	SYNGR3	5.7880487804878	11.7891743119266	1.02631369286836	0	0
23516	SLC39A14	2.92739837398374	5.96196330275229	1.02616840748194	0	0
9951	HS3ST4	5.8669918699187	11.937871559633	1.0248527389965	0	0
84054	PCDHB19P	5.78073170731707	11.7604587155963	1.0246203121403	0	0
6326	SCN2A	20.140081300813	40.9722385321101	1.02457720992305	3+	2+
84206	MEX3B	29.8860162601626	60.778623853211	1.02409340802029	0	0
9755	TBKBP1	7.31829268292683	14.8817247706422	1.0239627223018	0	0
134637	ADAT2	4.88243902439024	9.92592660550459	1.02359976031615	0	0
730094	C16orf52	9.77121951219512	19.8530642201835	1.02275116091267	0	0
147081	CRHR1-IT1	14.6239837398374	29.692	1.02173790255343	0	0
79786	KLHL36	13.3069918699187	27.0079266055046	1.02119841089148	0	0
56995	TULP4	34.0182926829268	69.0203119266055	1.02071025728223	0	0
57510	XPO5	12.9573983739837	26.2861651376147	1.02052760538559	0	0
6907	TBL1X	3.39650406504065	6.89003669724771	1.02046108608568	0	0
2802	GOLGA3	21.0550406504065	42.6821834862385	1.01946832090747	0	0
7273	TTN	10.8708130081301	22.0359266055046	1.01939772196497	0	0
9826	ARHGEF11	6.03991869918699	12.2364770642202	1.01858722425732	0	0
79685	SAP30L	9.80821138211382	19.8504220183486	1.01710770248866	0	0
6300	MAPK12	6.89934959349594	13.9602018348624	1.0167875304592	0	0
2931	GSK3A	8.21894308943089	16.6293027522936	1.01670289098116	0	0
6000	RGS7	7.13479674796748	14.432623853211	1.01638936912813	0	0
6508	SLC4A3	18.1252032520325	36.660623853211	1.01623416312126	0	0
54851	ANKRD49	39.7365040650406	80.3645871559633	1.01609496161069	0	0
7436	VLDLR	9.6260162601626	19.4667889908257	1.01600416852476	0	0
22902	RUFY3	108.942276422764	220.262660550459	1.01566102797792	0	0
88	ACTN2	3.01967479674797	6.10155963302752	1.01478487308296	0	0
80313	LRRC27	35.1256097560976	70.9217247706422	1.01370435234583	0	0
1408	CRY2	10.8063414634146	21.8099633027523	1.01310916781982	0	0
127602	DNAH14	4.91081300813008	9.90959633027523	1.01286440084392	0	0
9696	CROCC	12.4753658536585	25.1383486238532	1.01080775526911	0	0
55257	MRGBP	6.08512195121951	12.2605321100917	1.01066351248055	0	0
5552	SRGN	1.30975609756098	2.63816513761468	1.01023669534418	0	0
9020	MAP3K14	2.49520325203252	5.02390825688073	1.00965278086631	1	0
201931	TMEM192	29.5382926829268	59.4608990825688	1.00935483722326	0	0
284677	C1orf204	3.68357723577236	7.41130275229358	1.00861966769667	0	0
8884	SLC5A6	10.2188617886179	20.5438899082569	1.00747486342709	0	0
27246	RNF115	19.270081300813	38.7359816513762	1.00731164266545	0	0
26052	DNM3	17.4030894308943	34.9376513761468	1.00543918991836	0	0
7391	USF1	3.37821138211382	6.78157798165138	1.00536140452014	0	0
11336	EXOC3	13.9234146341463	27.9371926605505	1.00467398826434	0	0
23508	TTC9	8.74113821138211	17.5331559633028	1.00419264921076	0	0
128387	TATDN3	23.7639024390244	47.6297247706422	1.00309044130049	0	0
11151	CORO1A	7.13414634146341	14.2956330275229	1.00276179065934	0	0
50853	VILL	7.20252032520325	14.4314495412844	1.00264248431785	0	0
220164	DOK6	29.710406504065	59.5252844036697	1.00253426394469	0	0
55132	LARP1B	17.2670731707317	34.568623853211	1.00143961057444	0	0
23710	GABARAPL1	14.7043902439024	29.4347155963303	1.0012717277989	0	0
9229	DLGAP1	15.9330081300813	31.8697981651376	1.00017121097795	0	0
256435	ST6GALNAC3	10.1034146341463	20.2078532110092	1.00007310398048	0	0
26053	AUTS2	134.000081300813	267.992697247706	0.99995981204271	0	0
645166	LOC645166	11.5414634146341	23.0622752293578	0.99870868643165	0	0
79827	CLMP	36.6290243902439	73.1522935779817	0.997915823017954	0	0
23005	MAPKBP1	11.720487804878	23.4001834862385	0.997487226605011	0	0
26012	NSMF	44.9626016260163	89.7349174311927	0.996943957159934	0	0
10509	SEMA4B	9.66	19.2642201834862	0.995828692644553	0	0
121601	ANO4	10.7791869918699	21.4941100917431	0.99569301195313	0	0
9094	UNC119	20.2261788617886	40.317119266055	0.995168768163235	0	0
5214	PFKP	19.6580487804878	39.1185871559633	0.992734135793174	0	0
81532	MOB2	7.21520325203252	14.3509724770642	0.99203656170335	0	0
9452	ITM2A	12.1858536585366	24.2356697247706	0.991924630204075	0	0
7106	TSPAN4	1.38666666666667	2.75761467889908	0.991799855719513	1	0
998	CDC42	185.603821138211	369.07871559633	0.991702128782228	0	1
85462	FHDC1	17.3860975609756	34.5445871559633	0.990525524896896	0	0
91404	SESTD1	37.8421138211382	75.159504587156	0.989962878911381	0	0
10768	AHCYL1	27.089918699187	53.7520550458716	0.988563848993582	0	0
51678	MPP6	9.21276422764228	18.279871559633	0.9885499363047	0	0
91833	WDR20	40.3977235772358	80.1199449541284	0.987887430949318	0	0
257000	TINCR	3.07365853658537	6.09484403669725	0.987632403718785	0	0
85300	ATCAY	120.546910569106	238.753266055046	0.98592579143848	0	0
22808	MRAS	20.7886178861789	41.1515412844037	0.985152621153699	0	0
23046	KIF21B	70.1994308943089	138.957302752294	0.985110416040638	0	0
4615	MYD88	14.969756097561	29.6268623853211	0.984855130918184	0	0
283683	LOC283683	28.879674796748	57.1417614678899	0.98449101321431	0	0
51209	RAB9B	20.1045528455285	39.7737981651376	0.984296088800642	0	0
23136	EPB41L3	21.8055284552846	43.1117981651376	0.983388783200518	0	0
56884	FSTL5	11.5977235772358	22.9073211009174	0.981967094110201	0	0
7748	ZNF195	56.9372357723577	112.455155963303	0.981905449892036	0	0
285965	EPHA1-AS1	2.15089430894309	4.24788990825688	0.981809741500417	0	0
7965	AIMP2	1.26780487804878	2.50275229357798	0.98118278528049	0	0
949	SCARB1	9.02560975609756	17.817247706422	0.981178189211953	0	0
202243	CCDC125	6.0649593495935	11.9632110091743	0.980034790088687	0	1
23118	TAB2	13.1740650406504	25.9812844036697	0.97977217535461	0	0
55762	ZNF701	7.81252032520325	15.4012844036697	0.979190727637398	0	0
81579	PLA2G12A	25.0364227642276	49.3336330275229	0.978543091294204	0	0
166614	DCLK2	24.6676422764228	48.6053394495413	0.978494977127256	0	0
4524	MTHFR	12.4878048780488	24.6042752293578	0.978389118984606	0	0
286411	LINC00632	35.65	70.2343302752294	0.978274310146637	0	0
10629	TAF6L	7.44650406504065	14.6694678899083	0.978181357841328	0	0
84865	CCDC142	16.0407317073171	31.5923119266055	0.977833564758571	0	0
266727	MDGA1	10.7433333333333	21.1398348623853	0.976522419217032	0	0
11245	GPR176	2.25333333333333	4.43203669724771	0.975909081159938	0	0
8927	BSN	11.1182113821138	21.8626972477064	0.975546684036636	0	0
118812	MORN4	24.1691056910569	47.517871559633	0.975306124517864	0	0
23334	SZT2	3.81886178861789	7.50223853211009	0.974178426704028	0	0
9920	KBTBD11	27.6228455284553	54.2455779816514	0.973643591564167	0	0
968	CD68	2.37365853658537	4.66034862385321	0.973325471177593	0	0
65243	ZFP69B	3.93560975609756	7.72524770642202	0.972994018874169	0	0
55153	SDAD1	44.5333333333333	87.4086605504587	0.972890628710991	0	0
79800	CARF	6.78089430894309	13.3085504587156	0.972805981150782	0	0
4580	MTX1	29.6121951219512	58.1118348623853	0.972640568012894	0	0
414235	PRR26	10.7939024390244	21.1816513761468	0.972598517295105	0	0
9851	KIAA0753	8.43040650406504	16.5397064220183	0.972259524079701	0	0
7541	ZBTB14	9.31235772357724	18.2614678899083	0.971584352522876	0	0
6900	CNTN2	13.870487804878	27.1962385321101	0.971388602409246	0	0
89846	FGD3	6.2039837398374	12.1584587155963	0.970693544773468	0	0
84557	MAP1LC3A	36.3907317073171	71.3166605504587	0.970668089704452	0	0
147949	ZNF583	13.0427642276423	25.5555229357798	0.970385452532016	0	0
8945	BTRC	11.2456097560976	22.0258899082569	0.969838420667131	1	0
131566	DCBLD2	14.5327642276423	28.4531559633028	0.969279542873452	0	0
57666	FBRSL1	9.80731707317073	19.192128440367	0.968584291383353	0	0
27253	PCDH17	87.7291056910569	171.537321100917	0.967395028467381	0	0
375748	ERCC6L2	17.6677235772358	34.5441651376147	0.967325879474713	0	0
23365	ARHGEF12	22.4008130081301	43.7930642201835	0.967151305378558	0	0
59339	PLEKHA2	3.89642276422764	7.61735779816514	0.967140443545068	0	0
196403	DTX3	19.090487804878	37.3189908256881	0.967056006269299	0	0
29062	WDR91	7.08317073170732	13.8464587155963	0.96704982638498	0	0
7576	ZNF28	6.35674796747967	12.4262752293578	0.967033119309271	0	0
114799	ESCO1	15.469674796748	30.1890091743119	0.964580538512476	0	0
4135	MAP6	53.4611382113821	104.300146788991	0.964178729627188	0	0
104	ADARB1	8.32772357723577	16.2460183486239	0.964092091848593	0	0
1123	CHN1	26.1785365853659	51.0513394495413	0.963564363042295	0	0
440270	GOLGA8B	29.1041463414634	56.7413027522936	0.963174572279076	0	0
10156	RASA4	8.63414634146342	16.830495412844	0.962952193062024	0	0
9891	NUAK1	26.1236585365854	50.8958165137615	0.962190119933526	0	0
1740	DLG2	30.9185365853659	60.1942752293578	0.961154249896642	0	0
374969	CCDC23	141.74756097561	275.716201834862	0.959860135337438	0	0
83723	FAM57B	2.66325203252033	5.17746788990826	0.959057738930643	0	0
2026	ENO2	116.37243902439	226.111266055046	0.958283457402796	0	0
54187	NANS	20.5769918699187	39.9675963302752	0.957798719534475	0	0
9764	KIAA0513	4.82520325203252	9.37218348623853	0.957795484893593	0	0
55056	FLJ10038	13.4321951219512	26.0636880733945	0.956346150345115	0	0
374875	HSD11B1L	28.1117886178862	54.546752293578	0.956318052849603	0	0
4137	MAPT	139.028536585366	269.72880733945	0.956128574600364	0	1
643180	CCT6P3	13.0934146341463	25.3991926605505	0.955941253109613	0	0
4548	MTR	15.8925203252033	30.8218899082569	0.95560739289202	0	0
8573	CASK	24.6182113821138	47.7403853211009	0.955484263021827	0	0
25956	SEC31B	8.07845528455285	15.6632660550459	0.955233709567966	0	0
57711	ZNF529	20.7419512195122	40.1861100917431	0.954145318585586	0	0
23113	CUL9	9.08544715447155	17.6023302752294	0.954137006120418	0	0
126129	CPT1C	30.1069918699187	58.324128440367	0.953994274761869	0	0
5806	PTX3	16.7089430894309	32.3640366972477	0.953771083478425	0	0
9842	PLEKHM1	4.63918699186992	8.98533944954128	0.953701009002342	0	0
1949	EFNB3	20.109593495935	38.941119266055	0.953410432677689	0	0
11234	HPS5	5.84487804878049	11.3166788990826	0.953205804301559	0	0
23545	ATP6V0A2	10.9562601626016	21.204880733945	0.952640939399761	0	0
51720	UIMC1	14.1162601626016	27.3003119266055	0.95155951077826	0	0
3486	IGFBP3	1.20154471544715	2.32308256880734	0.951150093131713	0	0
2047	EPHB1	30.1434146341463	58.1473577981651	0.947870783355733	0	0
8869	ST3GAL5	10.5611382113821	20.3633211009174	0.947207545613319	0	0
9844	ELMO1	28.8012195121951	55.522880733945	0.946952522149364	0	0
2066	ERBB4	9.46593495934959	18.2418899082569	0.946438289851621	0	0
55770	EXOC2	13.6828455284553	26.3557614678899	0.945750085948232	0	0
90007	MIDN	25.8305691056911	49.7071009174312	0.944372533355168	0	0
100506696	PCAT6	11.5751219512195	22.274495412844	0.944365357282648	0	0
3983	ABLIM1	11.1046341463415	21.355504587156	0.943446123746059	0	0
1978	EIF4EBP1	127.180243902439	244.580440366972	0.943434452295046	0	0
440434	LOC440434	6.23154471544715	11.9824036697248	0.94325560449388	0	0
65982	ZSCAN18	23.3456910569106	44.8811376146789	0.942952950306006	0	0
5597	MAPK6	46.3365853658537	89.0777614678899	0.942913570442222	0	0
148266	ZNF569	11.7872357723577	22.658880733945	0.9428511678429	0	0
9612	NCOR2	17.6379674796748	33.8986422018349	0.942543167114773	0	1
57451	TENM2	5.77308943089431	11.0898348623853	0.941822403221126	0	0
22932	POMZP3	3.8219512195122	7.34075229357798	0.941618555676153	0	0
55571	CNOT11	5.54886178861789	10.657119266055	0.941553740995925	0	0
55284	UBE2W	21.8471544715447	41.9339816513762	0.940674436143521	0	0
84937	ZNRF1	38.3431707317073	73.5509357798165	0.939774053365993	0	0
3631	INPP4A	10.2982926829268	19.7538532110092	0.939728916629555	0	0
93185	IGSF8	33.3187804878049	63.9090458715596	0.939684551772172	0	0
253959	RALGAPA1	10.8406504065041	20.7881834862385	0.93931238141335	0	1
402176	RPL21P44	7.56707317073171	14.5103302752294	0.939273056892275	0	0
53905	DUOX1	5.12552845528455	9.8268256880734	0.939024707135253	1	0
7565	ZNF17	3.35024390243902	6.42216513761468	0.938793632955866	0	0
23608	MKRN1	32.7805691056911	62.8021467889908	0.937972974755936	0	0
60677	CELF6	5.01577235772358	9.60908256880734	0.937926823164497	0	0
1827	RCAN1	41.0227642276423	78.5818165137615	0.937770809936652	0	0
10924	SMPDL3A	6.6660162601626	12.7671559633028	0.937540441577605	0	0
9711	KIAA0226	12.0286178861789	23.0287706422018	0.936966513683562	0	0
7133	TNFRSF1B	2.25560975609756	4.31818348623853	0.936907058879749	0	0
5058	PAK1	35.9495121951219	68.7565137614679	0.935524201458081	0	0
10178	TENM1	4.64243902439024	8.87798165137615	0.935348765602885	0	0
64776	C11orf1	16.360243902439	31.2740733944954	0.93477288357593	0	0
83480	PUS3	17.3642276422764	33.1905688073394	0.934655112655667	0	0
101929147	LOC101929147	2.99260162601626	5.72005504587156	0.934628789968492	0	0
10244	RABEPK	28.3036585365854	54.0453944954128	0.933183135076711	0	0
440248	HERC2P9	4.02414634146341	7.67442201834862	0.931375330361186	0	0
54790	TET2	30.6564227642276	58.4628256880734	0.931330199054482	0	0
6650	CAPN15	5.85390243902439	11.1620917431193	0.931136802159958	0	0
404201	WDFY3-AS2	5.93219512195122	11.3057614678899	0.930420207187605	0	0
10493	VAT1	54.1261788617886	103.124935779817	0.929994773910643	0	0
1281	COL3A1	1.74674796747968	3.32719266055046	0.929633946114149	0	0
8897	MTMR3	38.3640650406504	73.0455412844037	0.929040617467517	0	0
57209	ZNF248	30.4986991869919	58.0662201834862	0.928951413977876	0	0
8128	ST8SIA2	41.7446341463415	79.4488073394495	0.928434796911976	0	0
57787	MARK4	6.0860162601626	11.581504587156	0.928252596782791	0	0
84878	ZBTB45	10.670243902439	20.3045321100917	0.928208628796533	1	0
56896	DPYSL5	143.181382113821	272.188844036697	0.926764026538681	0	0
7267	TTC3	493.632357723577	938.280935779817	0.926582985957669	0	0
3614	IMPDH1	13.3875609756098	25.4406605504587	0.926242983804754	0	0
90410	IFT20	4.78528455284553	9.09326605504587	0.926193848623046	0	0
3797	KIF3C	52.1326016260163	99.0640917431193	0.926176353274974	0	0
130733	TMEM178A	18.0305691056911	34.2530091743119	0.925785802579229	0	0
1363	CPE	99.0291869918699	188.106532110092	0.925624247936062	0	0
22864	R3HDM2	43.8064227642276	83.1454128440367	0.924494262928831	0	0
5910	RAP1GDS1	35.7806504065041	67.8896697247706	0.924012454434227	0	0
4684	NCAM1	229.501300813008	435.351816513761	0.923679412170626	0	0
91369	ANKRD40	11.2672357723577	21.3654128440367	0.923143576648269	0	0
23080	AVL9	15.8710569105691	30.0916697247706	0.922965955462192	0	0
25799	ZNF324	15.1343902439024	28.6887706422018	0.922655596775163	0	0
80315	CPEB4	21.7464227642276	41.2224036697248	0.922650530062948	0	0
51162	EGFL7	4.86642276422764	9.21418348623853	0.92099466927306	0	0
22820	COPG1	27.2261788617886	51.5493394495413	0.920959423788158	0	0
151525	WDSUB1	6.75845528455285	12.7903119266055	0.920286002399701	0	0
6482	ST3GAL1	17.8561788617886	33.7725321100917	0.919426966539368	0	0
30011	SH3KBP1	18.0834959349593	34.201119266055	0.919369930335513	0	0
28986	MAGEH1	103.49918699187	195.660110091743	0.918730223586501	0	0
19	ABCA1	22.0527642276423	41.6879266055046	0.91867011662793	0	0
1466	CSRP2	936.950975609756	1771.10053211009	0.918600637033852	0	0
25999	CLIP3	103.430081300813	195.479449541284	0.918361111292331	0	0
727896	LOC727896	3.12325203252033	5.90102752293578	0.917917194099363	0	0
26049	FAM169A	10.5468292682927	19.92	0.917408305956979	1	0
9019	MPZL1	39.8391056910569	75.2288073394495	0.91709995625881	0	0
9958	USP15	27.319756097561	51.5789541284404	0.91683791600876	1	0
79656	BEND5	31.5347154471545	59.5340917431193	0.916775138216233	0	0
219749	ZNF25	14.460081300813	27.2965871559633	0.916644921044278	0	0
7753	ZNF202	6.1520325203252	11.6118165137615	0.916458645569969	0	0
57521	RPTOR	1.58048780487805	2.98299082568807	0.916389637232372	0	1
533	ATP6V0B	202.599593495935	382.262403669725	0.915932035526982	0	0
10019	SH2B3	6.49186991869919	12.2485137614679	0.915900705590736	0	0
2801	GOLGA2	23.1456097560976	43.6594495412844	0.915555370935013	0	0
101927374	LOC101927374	8.45276422764228	15.9426605504587	0.915397295322921	0	0
4249	MGAT5	17.3473170731707	32.6889724770642	0.914091475514264	0	0
5569	PKIA	67.7565040650406	127.667908256881	0.913964576889969	0	0
10116	FEM1B	28.6194308943089	53.9197798165138	0.913819621291204	0	0
23361	ZNF629	6.65073170731707	12.5251559633028	0.913243589552889	0	0
79758	DHRS12	9.92455284552845	18.6848440366972	0.912794513859847	0	0
83698	CALN1	10.8117886178862	20.3512110091743	0.912509434330033	0	0
55582	KIF27	7.33325203252032	13.8017798165138	0.912329294036802	0	0
857	CAV1	2.08674796747967	3.92682568807339	0.912107192444019	0	0
120227	CYP2R1	7.37463414634146	13.877247706422	0.912078080071372	0	0
9923	ZBTB40	10.9879674796748	20.6754128440367	0.911991591548552	0	0
57621	ZBTB2	6.96666666666667	13.1033577981651	0.911396115064995	0	0
124930	ANKRD13B	17.8521951219512	33.5658348623853	0.910892045887173	0	0
83699	SH3BGRL2	14.160162601626	26.6216880733945	0.910764222985681	0	0
80232	WDR26	23.0653658536585	43.3550275229358	0.910471124485502	0	0
57616	TSHZ3	13.9656910569106	26.2418165137615	0.909980626298839	0	0
57670	KIAA1549	54.1450406504065	101.701541284404	0.909440436281617	0	0
81794	ADAMTS10	5.81178861788618	10.9126605504587	0.908948742997833	0	0
92181	UBTD2	16.5194308943089	31.0150642201835	0.908805126392598	0	0
150290	DUSP18	20.4736585365854	38.4118348623853	0.907781952873023	0	0
5067	CNTN3	10.3004878048781	19.3249357798165	0.907750958436549	0	0
390927	ZNF793	24.7752845528455	46.4719633027523	0.907458968360675	0	0
9896	FIG4	10.4008130081301	19.5020917431193	0.906932566956869	0	0
653483	MLLT4-AS1	35.1283739837398	65.8614128440367	0.906796661750208	0	0
84074	QRICH2	1.72447154471545	3.23271559633028	0.906592266220621	0	0
23304	UBR2	12.2892682926829	23.0317431192661	0.906224583541264	0	0
10943	MSL3	30.4323577235772	56.9731009174312	0.90467482110953	0	0
23223	RRP12	4.61487804878049	8.63754128440367	0.904328176891808	0	0
147991	DPY19L3	14.56	27.2500917431193	0.904250731494989	0	0
6100	RP9	46.6278861788618	87.2584587155963	0.904101962730707	0	0
22877	MLXIP	36.7781300813008	68.7838165137615	0.903221036588901	0	0
2800	GOLGA1	16.0310569105691	29.9760183486239	0.902939221887148	0	0
222255	ATXN7L1	9.37333333333333	17.5185504587156	0.902249312954224	0	0
25934	NIPSNAP3A	44.919674796748	83.8618165137615	0.900666597294591	0	0
51696	HECA	16.7282113821138	31.2300183486239	0.900650219555401	0	0
10785	WDR4	4.04512195121951	7.54845871559633	0.899998900087075	0	0
55610	CCDC132	13.2323577235772	24.6802018348624	0.899284050936887	0	0
79613	TANGO6	4.46894308943089	8.33433027522936	0.899132600118617	0	0
285600	KIAA0825	12.6584552845528	23.6052110091743	0.899004016425984	0	0
26063	DECR2	15.7521138211382	29.3615779816514	0.89838406416942	0	1
6696	SPP1	20.6617073170732	38.5070642201835	0.89816366438452	0	0
28992	MACROD1	5.33357723577236	9.93988990825688	0.898126398267737	0	0
284260	LINC00907	3.27528455284553	6.10306422018349	0.897913519680155	0	0
1501	CTNND2	70.9347154471545	132.137376146789	0.8974748421964	0	0
10439	OLFM1	46.3756097560976	86.3587155963303	0.896975535764883	0	0
112	ADCY6	10.1329268292683	18.8612293577982	0.896372765323341	0	0
7846	TUBA1A	6266.47024390244	11664.2198165138	0.896364872596659	0	1
64747	MFSD1	15.8562601626016	29.5139816513761	0.896346025040203	0	0
196394	AMN1	31.1336585365854	57.9397431192661	0.896078169505457	0	0
84264	HAGHL	3.31723577235772	6.17152293577982	0.895644989362943	0	0
55512	SMPD3	32.2739024390244	60.0275779816514	0.895257425027346	0	0
25851	TECPR1	25.8018699186992	47.9790275229358	0.894928291493396	0	0
274	BIN1	13.2030894308943	24.5453211009174	0.894572490437871	0	0
57613	KIAA1467	12.6543902439024	23.5243486238532	0.894516783710337	0	0
80325	ABTB1	11.0929268292683	20.6143853211009	0.894011377968001	0	0
271	AMPD2	14.000406504065	26.0101834862385	0.893607860002706	0	0
53349	ZFYVE1	12.3861788617886	23.0045871559633	0.893190381375373	0	0
57146	TMEM159	36.8349593495935	68.4095596330275	0.893122292622476	0	0
285704	RGMB	14.8537398373984	27.5855963302752	0.89308895329351	0	0
5567	PRKACB	58.8555284552846	109.189889908257	0.891589437769203	0	0
51000	SLC35B3	9.4479674796748	17.5240733944954	0.891262258060003	0	0
60561	RINT1	5.87617886178862	10.8980917431193	0.891125326000919	0	0
55788	LMBRD1	27.2065853658537	50.4577064220183	0.891118730736826	0	0
56259	CTNNBL1	122.794796747967	227.672495412844	0.89071058346698	0	0
155060	LOC155060	6.28211382113821	11.6472844036697	0.890671638275665	0	0
79856	SNX22	1.82658536585366	3.38653211009174	0.890659495094687	0	0
11054	OGFR	5.08308943089431	9.41979816513761	0.88999053451774	0	0
222865	TMEM130	11.4788617886179	21.2659449541284	0.889565367112022	0	0
388021	TMEM179	7.39658536585366	13.6957247706422	0.888794305460249	0	0
2770	GNAI1	59.9892682926829	111.071798165138	0.88871621405268	0	0
30811	HUNK	25.1237398373984	46.5071376146789	0.8884009136563	0	0
23038	WDTC1	7.24813008130081	13.4129174311927	0.887942318030737	0	0
1787	TRDMT1	10.1848780487805	18.8460550458716	0.887833856745161	0	0
116154	PHACTR3	46.7286178861789	86.4345137614679	0.887301136665214	0	0
9946	CRYZL1	47.2957723577236	87.4102018348624	0.886090438943626	0	0
7266	DNAJC7	21.1761788617886	39.1014678899083	0.884780482558759	0	0
2275	FHL3	7.76447154471545	14.331376146789	0.884217506418915	0	0
7805	LAPTM5	3.23821138211382	5.97565137614679	0.883898818565313	0	0
782	CACNB1	17.8963414634146	33.0082752293578	0.883163067364403	0	0
55614	KIF16B	6.09382113821138	11.2369908256881	0.882836684604975	0	0
171392	ZNF675	12.4330894308943	22.9082201834862	0.881680546781205	0	0
7844	RNF103	13.7208130081301	25.2793394495413	0.881592797333145	0	0
3163	HMOX2	35.3627642276423	65.144	0.881401256077541	0	0
7564	ZNF16	5.74121951219512	10.5762201834862	0.881394994967576	0	0
9213	XPR1	78.9331707317073	145.405449541284	0.881377731641273	0	0
84102	SLC41A2	2.68772357723577	4.95084403669725	0.881289731990933	0	0
23287	AGTPBP1	25.6651219512195	47.2586055045872	0.880767943525236	0	0
22839	DLGAP4	93.3210569105691	171.759889908257	0.880118619780008	0	0
26153	KIF26A	3.70487804878049	6.81811009174312	0.879945839806761	0	0
91012	CERS5	67.9732520325203	125.063486238532	0.879621586941744	0	0
8470	SORBS2	80.0680487804878	147.268403669725	0.879149380424735	0	0
57406	ABHD6	22.9310569105691	42.1755596330275	0.879104360541528	0	0
2891	GRIA2	226.378130081301	416.280550458716	0.878821565028184	1	0
3985	LIMK2	5.00178861788618	9.19620183486239	0.878594041512597	0	0
6002	RGS12	34.149756097561	62.7840550458716	0.878522936934124	0	0
55236	UBA6	37.390243902439	68.7175963302752	0.878017691240384	0	0
6752	SSTR2	106.471300813008	195.554752293578	0.87710798983072	0	0
133022	TRAM1L1	7.79471544715447	14.3136697247706	0.876825334079575	0	0
25827	FBXL2	20.790406504065	38.1761100917431	0.876752141833975	0	0
4783	NFIL3	11.0942276422764	20.3713944954128	0.876735507846372	0	0
81034	SLC25A32	10.7283739837398	19.6882935779816	0.875906640933824	0	0
282991	BLOC1S2	63.9413008130081	117.338990825688	0.875862489753994	0	0
84302	TMEM246	27.7251219512195	50.8415779816514	0.87481500207956	0	0
23366	KIAA0895	7.78666666666667	14.2787155963303	0.874788437933037	0	0
2885	GRB2	91.0518699186992	166.96319266055	0.874769541973297	0	0
57600	FNIP2	15.600406504065	28.602623853211	0.874563875998671	0	0
2842	GPR19	12.4458536585366	22.8180733944954	0.874511797380468	0	0
56243	KIAA1217	3.24756097560976	5.95363302752294	0.874413685181989	0	0
26011	TENM4	36.2858536585366	66.4787339449541	0.873485695762769	0	0
57649	PHF12	15.310406504065	28.0487706422018	0.873424951812408	1	0
10069	RWDD2B	8.61479674796748	15.7813394495413	0.873330996117945	0	0
11344	TWF2	25.6179674796748	46.9288073394495	0.873317778501867	1	0
7584	ZNF35	13.4071544715447	24.5533394495413	0.872916183107627	0	0
57192	MCOLN1	13.7469918699187	25.1649541284404	0.872300006796671	0	0
23132	RAD54L2	12.4682113821138	22.8153027522936	0.871747278766584	0	1
2916	GRM6	2.21845528455285	4.05902752293578	0.871578648191892	0	0
5738	PTGFRN	9.72650406504065	17.7922568807339	0.871256257980816	0	0
92	ACVR2A	135.596016260163	247.91895412844	0.870553780419186	0	0
22981	NINL	20.7189430894309	37.8798348623853	0.870479630941456	1	0
747	DAGLA	6.94747967479675	12.693119266055	0.869485033458238	0	0
7026	NR2F2	4.96008130081301	9.05700917431193	0.868670950898292	0	0
117177	RAB3IP	14.6630894308943	26.7719449541284	0.868532849818802	0	0
83851	SYT16	10.1873170731707	18.5998348623853	0.868515658433539	0	0
9870	AREL1	12.3453658536585	22.5341100917431	0.868140885595626	0	0
51062	ATL1	59.0188617886179	107.721155963303	0.868053613717977	0	0
23623	RUSC1	32.4668292682927	59.256623853211	0.868009934109574	0	0
9144	SYNGR2	9.43121951219512	17.1941651376147	0.866402830497513	0	0
6996	TDG	111.412276422764	203.079247706422	0.866134610061469	0	0
9246	UBE2L6	154.158048780488	280.825963302752	0.865266107520664	0	0
1677	DFFB	6.8509756097561	12.4772844036697	0.86492262149167	0	0
130612	TMEM198	5.51463414634146	10.0391009174312	0.864292987722334	0	0
6092	ROBO2	96.0010569105691	174.651211009174	0.863354452041926	0	0
58986	TMEM8A	6.17390243902439	11.2292844036697	0.863011403065924	0	0
342667	STAC2	1.22056910569106	2.21845871559633	0.862003726217601	0	0
2310	FOXO3B	32.9215447154472	59.836495412844	0.861993649726992	0	0
9852	EPM2AIP1	56.1150406504065	101.957229357798	0.861504657583146	0	0
7690	ZNF131	33.3243902439024	60.5426972477064	0.861374472631835	0	0
8851	CDK5R1	114.302601626016	207.65528440367	0.861332344965338	0	0
863	CBFA2T3	9.76634146341463	17.7357064220183	0.860766669346565	0	0
23285	KIAA1107	12.7463414634146	23.126623853211	0.859471454170914	0	0
167691	LCA5	10.069674796748	18.2665137614679	0.859184224198264	0	0
155382	VPS37D	3.89016260162602	7.05484403669725	0.858783730669143	0	0
8694	DGAT1	8.70211382113821	15.7796513761468	0.858627539725409	0	0
81285	OR51E2	1.84146341463415	3.33633027522936	0.857409378670966	0	0
121053	C12orf45	31.7921138211382	57.5797798165138	0.856893329284512	0	0
6666	SOX12	30.6991056910569	55.5987889908257	0.856856831206632	0	0
11332	ACOT7	131.265853658537	237.730183486239	0.856833412060804	0	0
79751	SLC25A22	17.4615447154472	31.6162201834862	0.85648370840096	0	0
84299	MIEN1	151.276504065041	273.726788990826	0.855548706026639	0	0
26270	FBXO6	4.03154471544715	7.29436697247706	0.855450058382509	0	0
79837	PIP4K2C	6.79439024390244	12.2873211009174	0.854754422966487	0	0
26999	CYFIP2	62.0082926829268	112.113467889908	0.854426523208914	0	0
7644	ZNF91	93.0846341463415	168.259302752294	0.854071329940289	0	0
3801	KIFC3	7.45422764227642	13.4717798165138	0.853809681370039	0	0
7122	CLDN5	12.2739024390244	22.1797431192661	0.853648635477724	0	0
339500	ZNF678	11.960487804878	21.6057064220183	0.853136171561931	0	0
347735	SERINC2	20.4327642276423	36.8871376146789	0.852233451512185	0	0
170506	DHX36	44.4813008130081	80.2858899082569	0.851947480211728	0	0
55716	LMBR1L	6.20455284552846	11.1964036697248	0.851636261228271	0	0
25906	ANAPC15	3.76463414634146	6.7922752293578	0.851385251320825	0	0
89796	NAV1	89.8974796747967	162.195889908257	0.851384687028345	0	0
81875	ISG20L2	28.7660162601626	51.8955963302752	0.851246682601842	0	0
11216	AKAP10	9.18593495934959	16.5699449541284	0.851070336127322	0	0
50848	F11R	4.71276422764228	8.498	0.850549836310166	0	0
389072	PLEKHM3	11.0765040650407	19.9653577981651	0.849996312776954	0	0
57494	RIMKLB	51.2793495934959	92.4250458715596	0.849905890924964	0	0
56901	NDUFA4L2	3.31617886178862	5.97611009174312	0.849684903371138	0	0
9858	PPP1R26	11.2326829268293	20.2406605504587	0.849553816230028	0	0
6715	SRD5A1	16.9378048780488	30.5186972477064	0.849446464129008	0	0
5648	MASP1	32.5530081300813	58.6428623853211	0.849164658944336	0	0
4326	MMP17	6.24918699186992	11.2547339449541	0.848791537731655	0	0
6844	VAMP2	256.618048780488	462.137449541284	0.848699360339744	0	0
57631	LRCH2	17.1977235772358	30.9648256880734	0.848412713268794	0	0
9379	NRXN2	33.6920325203252	60.6623119266055	0.848393018422212	0	0
107	ADCY1	34.459674796748	62.0417798165138	0.84833098750949	0	0
128061	C1orf131	41.3543089430894	74.4458165137615	0.848153118852754	0	0
4832	NME3	58.0948780487805	104.570972477064	0.847999555303448	0	0
56980	PRDM10	6.99317073170732	12.5851376146789	0.847702359242264	0	0
7625	ZNF74	23.4706504065041	42.2184403669725	0.847015462017101	0	0
84303	CHCHD6	58.699674796748	105.578	0.846884826150462	0	0
285315	C3orf33	10.7781300813008	19.3854311926606	0.846865921660566	0	0
22806	IKZF3	2.66512195121951	4.79201834862385	0.846431882569545	0	0
388	RHOB	18.9505691056911	34.0708256880734	0.846295736084369	0	0
55072	RNF31	6.40650406504065	11.5139449541284	0.845773000916902	0	0
54956	PARP16	12.0558536585366	21.6669174311927	0.845760104887876	0	0
101410538	MMP24-AS1	4.94861788617886	8.89366972477064	0.845753182801702	0	0
79230	ZNF557	18.7191056910569	33.6418348623853	0.845744882371442	0	0
9900	SV2A	36.719512195122	65.9573394495413	0.844986312100012	0	0
11138	TBC1D8	4.37918699186992	7.86273394495413	0.844367983682284	0	0
90480	GADD45GIP1	93.030487804878	167.028568807339	0.844319387877599	0	0
84342	COG8	8.94634146341463	16.0511376146789	0.84330582190818	0	0
147166	TRIM16L	5.5949593495935	10.0369357798165	0.84311933541348	0	0
253769	WDR27	3.74406504065041	6.71642201834862	0.843087385984715	0	0
81831	NETO2	45.6334959349593	81.8606422018349	0.8430768034645	0	0
25962	KIAA1429	19.3219512195122	34.6494862385321	0.842593169606321	0	0
497661	C18orf32	5.92975609756098	10.6263669724771	0.841603770778712	0	0
23648	SSBP3	62.4021951219512	111.825357798165	0.841578689644822	0	0
200576	PIKFYVE	14.6922764227642	26.3123486238532	0.840682083786763	0	0
55714	TENM3	5.42252032520325	9.71108256880734	0.840668577330067	0	0
114881	OSBPL7	5.83560975609756	10.449871559633	0.840529895659356	0	1
10046	MAMLD1	8.20243902439024	14.6877614678899	0.840489665272069	0	0
9382	COG1	6.55691056910569	11.7404587155963	0.840400654666058	0	0
140767	NRSN1	10.7262601626016	19.1956146788991	0.839629607589161	0	0
4325	MMP16	15.9889430894309	28.600495412844	0.838965561245011	0	0
3831	KLC1	124.971788617886	223.482532110092	0.83855961680379	1	0
114798	SLITRK1	8.42121951219512	15.058752293578	0.838501162904328	0	0
49854	ZBTB21	9.29276422764228	16.6126422018349	0.838101838880444	0	0
23082	PPRC1	5.87715447154472	10.5051009174312	0.837900298497615	0	0
23348	DOCK9	15.1621951219512	27.0908073394495	0.837324752024709	0	0
7477	WNT7B	1.15585365853659	2.06471559633028	0.836984320467165	1	0
493812	HCG11	7.29024390243902	13.0080366972477	0.835364245263555	0	0
84255	SLC37A3	30.7930894308943	54.9380917431193	0.835200181363113	0	0
142679	DUSP19	3.34056910569106	5.95946788990826	0.835089616909373	0	0
55825	PECR	7.12382113821138	12.7053577981651	0.834713804541679	0	0
9077	DIRAS3	3.4120325203252	6.082	0.833914419217692	0	0
11285	B4GALT7	13.4055284552846	23.8934495412844	0.833787060882594	0	0
157769	FAM91A1	11.3285365853659	20.1888073394495	0.833594178916241	1	0
81566	CSRNP2	20.2224390243902	36.0235596330275	0.832983735896179	0	0
23705	CADM1	143.116097560976	254.909816513761	0.83280097811608	0	0
148252	DIRAS1	15.5158536585366	27.6216146788991	0.832054583873623	0	0
728730	LOC728730	3.97967479674797	7.08387155963303	0.831887510010529	0	0
84280	BTBD10	38.4634959349593	68.4622568807339	0.831818957314116	0	0
5351	PLOD1	7.44073170731707	13.2398899082569	0.831374720669834	0	0
6457	SH3GL3	16.8976422764228	30.0408256880734	0.83010250494715	0	0
56666	PANX2	7.11105691056911	12.6408990825688	0.829963171214574	0	0
503542	SPRN	8.94186991869919	15.8867339449541	0.829174096820267	0	0
25930	PTPN23	9.64390243902439	17.1286605504587	0.828723376730834	0	0
80148	PQLC1	14.1692682926829	25.1634678899083	0.828565501400714	0	0
1137	CHRNA4	6.59918699186992	11.718	0.828366151996816	0	0
146198	ZFP90	39.9087804878049	70.8609541284404	0.828284696802245	0	0
5532	PPP3CB	39.349674796748	69.8594678899083	0.828103941255023	0	0
10948	STARD3	19.4761788617886	34.5667339449541	0.827673641340593	0	0
112611	RWDD2A	7.2349593495935	12.8394862385321	0.827530659407916	0	0
8525	DGKZ	8.6319512195122	15.3137431192661	0.82706834503475	0	0
222962	SLC29A4	13.690487804878	24.2869908256881	0.827009898087184	0	0
598	BCL2L1	17.7061788617886	31.3969357798165	0.826370864208445	0	0
266812	NAP1L5	15.680081300813	27.7994311926605	0.826122324293912	0	0
101927151	LOC101927151	11.8606504065041	21.0066972477064	0.824666228266381	0	0
90324	CCDC97	11.07	19.5931559633028	0.823694575991001	0	0
90809	TMEM55B	7.70829268292683	13.6426055045872	0.823635944042803	0	0
8487	GEMIN2	20.4394308943089	36.1746422018349	0.823623720211772	0	0
2104	ESRRG	7.92918699186992	14.032623853211	0.82353993881236	0	0
115704	EVI5L	9.28642276422764	16.429871559633	0.823126335899309	0	0
10550	ARL6IP5	98.3829268292683	173.983100917431	0.822467302978703	0	0
9315	NREP	312.48406504065	552.582183486238	0.822406424930467	0	0
377	ARF3	36.7507317073171	64.968752293578	0.821973024599178	0	0
27349	MCAT	14.3468292682927	25.3624036697248	0.821959552181698	0	0
58476	TP53INP2	22.8164227642276	40.3211009174312	0.82146241160826	0	0
10904	BLCAP	81.4128455284553	143.852972477064	0.821266682521399	0	0
55917	CTTNBP2NL	24.6330894308943	43.5157247706422	0.820939246082896	0	1
169834	ZNF883	47.6926016260163	84.2144587155963	0.820302466028606	0	0
339327	ZNF546	18.5147967479675	32.6836146788991	0.819888836734077	0	0
57678	GPAM	13.0272357723577	22.9944403669725	0.819754092887049	0	0
5287	PIK3C2B	8.56089430894309	15.1090825688073	0.81958264205774	0	0
5934	RBL2	5.70260162601626	10.0642201834862	0.819543233603407	0	0
256356	GK5	13.9757723577236	24.6622568807339	0.819376814568626	0	0
390	RND3	121.09487804878	213.665651376147	0.819217156144121	0	0
2890	GRIA1	55.0707317073171	97.1367706422018	0.818731746834342	0	0
22911	WDR47	59.6637398373984	105.226348623853	0.818569683459938	0	0
654466	KGFLP2	5.23284552845528	9.22585321100917	0.818086666631777	0	0
23625	FAM89B	66.8620325203252	117.865724770642	0.817885128278782	0	0
57677	ZFP14	33.7063414634146	59.417504587156	0.817867972676667	0	0
80854	SETD7	27.2763414634146	48.0705871559633	0.817504274594991	0	0
57636	ARHGAP23	8.42382113821138	14.8446605504587	0.817397394651936	0	0
8473	OGT	35.1407317073171	61.9248256880734	0.817373670698633	0	0
11072	DUSP14	46.5633333333333	82.0405871559633	0.817143476796728	0	0
10799	RPP40	15.3048780487805	26.9631559633028	0.816997820559942	0	0
84912	SLC35B4	40.9873170731707	72.1994862385321	0.816811013262915	0	0
65108	MARCKSL1	482.063089430894	849.134862385321	0.816771735735413	0	0
138241	C9orf85	8.80276422764228	15.5040733944954	0.81661877301395	0	0
5562	PRKAA1	13.4743089430894	23.7290642201835	0.816443924133718	0	0
285368	PRRT3	8.43609756097561	14.8561834862385	0.81641585429868	0	0
64848	YTHDC2	32.3033333333333	56.8604770642202	0.815743161225381	0	0
11276	SYNRG	47.7878861788618	84.1122752293578	0.815671407093133	0	0
100507524	ARHGEF26-AS1	2.53650406504065	4.46447706422018	0.815649726073721	0	0
439921	MXRA7	14.28	25.1281651376147	0.815309349889393	0	0
401612	SLC25A53	3.52455284552846	6.19917431192661	0.814635834405472	0	0
7697	ZNF138	23.0165040650406	40.4802201834862	0.814548415501234	0	0
2011	MARK2	14.6544715447154	25.7529174311927	0.813394934029138	0	0
3654	IRAK1	18.8259349593496	33.0803302752294	0.813252122729023	0	0
63893	UBE2O	22.2980487804878	39.1804770642202	0.813217493288901	0	0
256949	KANK3	2.63747967479675	4.6331376146789	0.812829558291935	0	0
56658	TRIM39	4.89634146341463	8.5968623853211	0.812106039580373	0	0
8321	FZD1	3.68934959349594	6.47761467889908	0.812096150261642	0	0
2166	FAAH	8.00731707317073	14.050128440367	0.811192478837812	0	0
146923	RUNDC1	14.1531707317073	24.8334862385321	0.81116151195216	1	0
199692	ZNF627	29.5809756097561	51.9018532110092	0.811116417740296	0	0
342945	ZSCAN22	6.93658536585366	12.1639633027523	0.810315813819923	0	0
83541	FAM110A	31.2220325203252	54.7299633027523	0.80976643094801	0	0
57148	RALGAPB	17.2477235772358	30.2225137614679	0.809217699980151	1	0
51562	MBIP	21.6925203252033	38.0009357798165	0.808837264692755	0	0
3709	ITPR2	14.7190243902439	25.7798899082569	0.808564053235227	0	0
54874	FNBP1L	167.352032520325	292.97576146789	0.807895239316274	0	0
2550	GABBR1	34.3878048780488	60.1556697247706	0.806803693730928	0	0
488	ATP2A2	29.5875609756098	51.7509724770642	0.806595199088168	0	0
284131	ENDOV	17.1451219512195	29.9848623853211	0.806436185581949	0	0
115509	ZNF689	11.6554471544715	20.380880733945	0.806212043402416	0	0
55521	TRIM36	132.979674796748	232.495651376147	0.805997977480527	0	0
79791	FBXO31	7.89926829268293	13.8070091743119	0.80560991382359	0	0
81669	CCNL2	74.4129268292683	129.985871559633	0.804729652563037	0	0
63977	PRDM15	5.12593495934959	8.95392660550459	0.804705319607811	0	0
64478	CSMD1	4.09308943089431	7.1494495412844	0.804641979600255	0	0
23592	LEMD3	10.2435772357724	17.8920366972477	0.804598004889466	0	0
9732	DOCK4	31.5042276422764	55.0226972477064	0.804481422247392	0	0
142891	SAMD8	17.9278861788618	31.3048623853211	0.804181364652876	0	0
22872	SEC31A	47.2207317073171	82.4418348623853	0.803956217527219	0	0
150726	FBXO41	4.32276422764228	7.54664220183486	0.803880724534258	0	0
9966	TNFSF15	1.46788617886179	2.56148623853211	0.803241036278008	0	0
4122	MAN2A2	15.1194308943089	26.3820733944954	0.803154115388226	0	1
2762	GMDS	13.3846341463415	23.352880733945	0.803022821890191	0	0
131096	KCNH8	14.4010569105691	25.1258348623853	0.802996837230648	0	0
55626	AMBRA1	5.69308943089431	9.93139449541284	0.802784542165062	0	0
1004	CDH6	9.12528455284553	15.9162201834862	0.802556310278388	0	0
83482	SCRT1	2.9509756097561	5.14508256880734	0.802002233087261	0	0
51611	DPH5	12.3165040650407	21.4737431192661	0.801980873962326	0	0
28512	NKIRAS1	15.1189430894309	26.3591926605505	0.801948894108979	0	0
84100	ARL6	8.46634146341463	14.7577431192661	0.801661527422917	0	0
948	CD36	1.32764227642276	2.31388990825688	0.801453749270115	0	0
3742	KCNA6	8.07357723577236	14.0694311926606	0.801284054891748	0	0
55223	TRIM62	2.47073170731707	4.30412844036697	0.800782770995608	0	0
92935	MARS2	3.10308943089431	5.40533944954128	0.800679944641389	0	0
1025	CDK9	8.86634146341463	15.4384403669725	0.800116184785312	0	0
23386	NUDCD3	44.0087804878049	76.5803119266055	0.799182142319658	0	0
79153	GDPD3	6.36520325203252	11.0760550458716	0.799165641011607	0	0
51701	NLK	9.08138211382114	15.7932660550459	0.798325766082406	0	0
25929	GEMIN5	5.74666666666667	9.99220183486239	0.798077249987376	0	0
84376	HOOK3	36.8620325203252	64.0943302752294	0.798061121702977	0	0
338707	B4GALNT4	57.2744715447154	99.5600366972477	0.797674519834105	0	0
2775	GNAO1	64.2130894308943	111.549027522936	0.796738619647565	0	2+
79798	ARMC5	8.50853658536585	14.7798165137615	0.796645435130844	0	0
3633	INPP5B	7.08414634146341	12.3037064220183	0.796427064637719	0	0
100128288	LOC100128288	8.97829268292683	15.592495412844	0.796338802012862	0	0
91801	ALKBH8	3.38674796747967	5.88157798165138	0.796302641450813	0	0
200765	TIGD1	11.6249593495935	20.1878899082569	0.796264452858692	0	0
339983	NAT8L	13.9426016260163	24.2115596330275	0.796196229582613	0	0
10984	KCNQ1OT1	131.731138211382	228.718128440367	0.795974313981398	0	0
166378	SPATA5	8.89113821138211	15.4337064220183	0.795644543764156	0	0
56965	PARP6	46.4813008130081	80.6697798165138	0.795377874007487	0	0
152485	ZNF827	123.926178861789	215.072623853211	0.795342916124249	0	0
22888	UBOX5	9.30813008130081	16.1472293577982	0.794723361863903	0	0
91942	NDUFAF2	70.9986178861789	123.138220183486	0.794415775985814	0	0
57515	SERINC1	119.301463414634	206.881449541284	0.794192548723681	0	0
55238	SLC38A7	13.9564227642276	24.1991559633028	0.794027523915348	0	0
9136	RRP9	18.5964227642276	32.2396330275229	0.793810193225658	0	0
55731	FAM222B	22.6866666666667	39.3127889908257	0.793154066792638	0	0
9919	SEC16A	21.4789430894309	37.1966605504587	0.792250099941998	0	0
83693	HSDL1	59.0642276422764	102.215908256881	0.791263216841725	0	0
100846978	LINC00506	10.7734959349593	18.6420917431193	0.791077275469003	0	0
116442	RAB39B	12.0353658536585	20.8139449541284	0.790270433185459	0	0
10603	SH2B2	5.05829268292683	8.7468256880734	0.790109026599792	0	0
8131	NPRL3	13.1980487804878	22.8194311926605	0.789938175683665	0	0
2583	B4GALNT1	24.7922764227642	42.8645871559633	0.789895502829698	1	0
25822	DNAJB5	15.5956910569106	26.962128440367	0.789786908993512	0	0
80022	MYO15B	3.97349593495935	6.86924770642202	0.789743240788224	0	0
4238	MFAP3	16.6053658536585	28.7066055045872	0.789733235975849	0	0
157773	C8orf48	4.91585365853659	8.49726605504587	0.789556768989566	0	0
54849	DEF8	60.7637398373984	105.019596330275	0.789375983911396	0	0
5136	PDE1A	52.1332520325203	90.0731009174312	0.788892472532045	0	0
516	ATP5G1	238.884390243902	412.593541284404	0.788408652697149	0	0
57338	JPH3	9.96032520325203	17.2024220183486	0.788346951786407	0	0
8242	KDM5C	11.5034146341463	19.8605688073394	0.787844772901644	0	0
84925	DIRC2	4.16121951219512	7.18139449541284	0.787257620950694	0	0
56131	PCDHB4	5.79260162601626	9.9951376146789	0.787014980259727	0	0
57498	KIDINS220	195.249105691057	336.815834862385	0.78664402568202	0	0
54681	P4HTM	20.9086178861789	36.0674678899083	0.786600443336172	0	0
60468	BACH2	43.9342276422764	75.7785688073395	0.786444560850792	0	0
23126	POGZ	51.7968292682927	89.3189908256881	0.786103164553173	3+	0
6683	SPAST	27.8270731707317	47.9845137614679	0.786079698935487	3+	0
23229	ARHGEF9	23.1868292682927	39.9767889908257	0.785857047712799	0	1
57185	NIPAL3	3.42048780487805	5.89453211009174	0.785175214668634	0	0
5373	PMM2	12.4251219512195	21.4093944954128	0.784983981971667	1	0
389015	SLC9A4	9.33861788617886	16.0854495412844	0.784475303430814	0	0
84273	NOA1	20.6960162601626	35.6395596330275	0.784126418232279	0	0
9910	RABGAP1L	13.8547967479675	23.8573027522936	0.784045398302805	0	0
2987	GUK1	189.476097560976	326.226770642202	0.783859312884097	0	0
950	SCARB2	56.2704878048781	96.8734311926605	0.78372257180826	0	0
26057	ANKRD17	49.2154471544715	84.6862752293578	0.783016974142854	0	0
79675	FASTKD1	13.4420325203252	23.1214678899083	0.782481692483656	0	0
31	ACACA	46.0542276422764	79.1902018348624	0.781988339846131	0	0
5050	PAFAH1B3	654.106341463415	1124.35330275229	0.781498334961053	0	0
90134	KCNH7	3.76983739837398	6.47988990825688	0.781467004151635	0	0
9892	SNAP91	25.6911382113821	44.1457614678899	0.781004119862785	0	0
55048	VPS37C	6.70268292682927	11.5139633027523	0.780573925934199	0	0
55180	LINS	12.0243902439024	20.6443119266055	0.779780597523595	0	0
345630	FBLL1	14.3536585365854	24.6410091743119	0.779642837389459	0	0
27241	BBS9	7.18634146341463	12.3253211009174	0.778295839757801	0	0
5305	PIP4K2A	13.1574796747967	22.5657247706422	0.778249949865183	0	0
6328	SCN3A	44.4030894308943	76.1272844036697	0.777753557241233	0	0
84449	ZNF333	10.8133333333333	18.5303669724771	0.777080133720057	0	0
286101	ZNF252P	9.49065040650406	16.2605137614679	0.776793975520109	0	0
122060	SLAIN1	16.9119512195122	28.9745504587156	0.776743157376331	0	0
22889	KIAA0907	13.5042276422764	23.1306605504587	0.776395337080756	0	0
55316	RSAD1	19.2781300813008	33.0102568807339	0.775949244015438	0	0
146050	ZSCAN29	10.579593495935	18.1143302752294	0.775847272063721	0	0
64839	FBXL17	6.05512195121951	10.3650458715596	0.77549857979805	0	0
55680	RUFY2	63.8447154471545	109.256183486239	0.775075817840043	0	0
9672	SDC3	21.7088617886179	37.1432293577982	0.774815167117752	0	0
90333	ZNF468	5.68609756097561	9.72724770642202	0.774592804091847	0	0
7589	ZSCAN21	4.26894308943089	7.29656880733945	0.773339270123905	0	0
1729	DIAPH1	15.4682113821138	26.4327155963303	0.773018264640941	0	0
8725	URI1	15.4589430894309	26.4089724770642	0.772586482878909	0	0
159195	USP54	6.88585365853659	11.7631926605505	0.77257225120724	1	0
729288	ZNF286B	16.9053658536585	28.8782752293578	0.772503340726613	0	0
3658	IREB2	31.3841463414634	53.6069908256881	0.772385185442701	0	0
79571	GCC1	6.7649593495935	11.5548073394495	0.772340034810791	0	0
79868	ALG13	16.4086991869919	28.0256330275229	0.772286087638621	0	2+
376940	ZC3H6	67.8186991869919	115.823082568807	0.772167781221606	0	0
63939	FAM217B	52.2243089430894	89.1887339449541	0.772139987725497	0	0
1690	COCH	8.17406504065041	13.9584770642202	0.772015917316947	0	0
8788	DLK1	1.94154471544715	3.31456880733945	0.77161626803212	0	0
28962	OSTM1	14.7071544715447	25.1012293577982	0.771239881225527	0	0
404217	CTXN1	19.4375609756098	33.1729908256881	0.771161888166251	0	0
139728	PNCK	1.69121951219512	2.8848623853211	0.770438573776489	0	0
100507433	ZNF571-AS1	4.90552845528455	8.36622018348624	0.77016740628801	0	0
23150	FRMD4B	41.0891056910569	70.0624403669725	0.769885309551753	0	0
673	BRAF	6.71650406504065	11.4518348623853	0.769796359797342	0	1
162239	ZFP1	20.7608943089431	35.395504587156	0.76969755073699	0	0
101930071	LOC101930071	3.29235772357724	5.61304587155963	0.76966275250466	0	0
80012	PHC3	17.7234959349593	30.2145688073395	0.769581151902006	0	0
6880	TAF9	98.5786178861789	168.043504587156	0.769488119927856	0	0
100506930	LINC00665	15.8826829268293	27.0698899082569	0.769234384908515	0	0
79963	ABCA11P	6.73943089430894	11.4796513761468	0.768380155215426	0	0
6489	ST8SIA1	25.3982926829268	43.254880733945	0.768131410940503	0	0
9863	MAGI2	31.1466666666667	53.0416880733945	0.768048917043489	0	0
23405	DICER1	48.1988617886179	82.0606972477064	0.767692334718881	0	0
1745	DLX1	6.38016260162602	10.86	0.767359005768298	0	0
57507	ZNF608	16.3360162601626	27.7981467889908	0.766932499096569	0	0
57555	NLGN2	23.7263414634146	40.3701100917431	0.766797863066022	0	1
4899	NRF1	10.4307317073171	17.7331376146789	0.765607456942228	0	0
84186	ZCCHC7	23.9464227642276	40.6876697247706	0.764781501262553	0	0
59338	PLEKHA1	27.0366666666667	45.9381100917431	0.764774211374822	0	0
23157	SEPT6	41.7136585365854	70.8742568807339	0.764741852688104	0	0
529	ATP6V1E1	75.8566666666667	128.820568807339	0.764015084788457	0	0
283554	GPR137C	16.4411382113821	27.9199082568807	0.763984021448671	0	0
51606	ATP6V1H	53.7873170731707	91.3220366972477	0.763697006751488	0	0
5892	RAD51D	6.80081300813008	11.5440366972477	0.763368661309236	0	0
3298	HSF2	42.690487804878	72.4596880733945	0.763263947545488	0	1
147929	ZNF565	12.7110569105691	21.5743302752294	0.763231781141016	0	0
57604	KIAA1456	40.9952032520325	69.5571376146789	0.762743451296952	0	1
9334	B4GALT5	31.1085365853659	52.7821100917431	0.762738498129177	0	0
55450	CAMK2N1	101.146260162602	171.607229357798	0.76266735315327	0	0
728190	NUTM2A-AS1	3.3650406504065	5.70820183486239	0.762412414600284	0	0
400073	C12orf76	23.9981300813008	40.7073944954128	0.762368887398315	0	0
56477	CCL28	1.63886178861789	2.77985321100917	0.762314512384009	0	0
81573	ANKRD13C	23.5153658536585	39.8515779816514	0.761033073053958	0	0
79183	TTPAL	20.1067479674797	34.0709357798165	0.760861811135277	0	0
56172	ANKH	22.2039837398374	37.6192110091743	0.760651049701018	0	0
1843	DUSP1	109.769024390244	185.938	0.760350643696747	0	0
8660	IRS2	21.8436585365854	36.9979266055046	0.760229913508872	0	0
100505687	LINC00888	27.8413821138211	47.1540550458716	0.76015100995231	0	0
51655	RASD1	9.10650406504065	15.4214495412844	0.759969154921202	0	0
57626	KLHL1	5.01569105691057	8.49363302752294	0.759933289917052	0	0
2959	GTF2B	52.7322764227642	89.2890091743119	0.75979632264296	0	1
146880	LOC146880	6.21292682926829	10.5137981651376	0.758938976049515	0	0
23191	CYFIP1	19.8083739837398	33.5150275229358	0.758697660479643	0	0
10092	ARPC5	198.893089430894	336.33823853211	0.757919658813143	0	0
123169	LEO1	51.0067479674797	86.2376880733945	0.757630379832496	1	0
9647	PPM1F	11.2734146341463	19.0588623853211	0.757537444628076	0	0
535	ATP6V0A1	52.749918699187	89.1496330275229	0.757059988934562	0	0
84874	ZNF514	8.23918699186992	13.922623853211	0.756857236154468	0	0
55113	XKR8	7.9219512195122	13.386128440367	0.756811039398881	0	0
1778	DYNC1H1	173.314390243902	292.719155963303	0.756125714853092	0	2+
84306	PDCD2L	22.4035772357724	37.8334495412844	0.755933213585278	0	0
222161	DKFZP586I1420	20.7206504065041	34.9911743119266	0.75592179366225	0	0
148156	ZNF558	8.30260162601626	14.0206055045872	0.755913274111368	0	0
140597	TCEAL2	128.811138211382	217.520550458716	0.755894359668217	0	0
55922	NKRF	10.2817886178862	17.3554678899083	0.75529900232268	0	0
57142	RTN4	252.751138211382	426.519669724771	0.754894686549342	0	0
10199	MPHOSPH10	59.9030081300813	101.066935779817	0.754610736990371	0	0
23373	CRTC1	28.2921138211382	47.730880733945	0.754522986867686	0	0
51339	DACT1	18.8717073170732	31.8273944954128	0.754044108638484	0	0
83548	COG3	13.8546341463415	23.365119266055	0.753987786720157	0	0
54475	NLE1	6.49186991869919	10.9479633027523	0.753956506768068	0	0
79871	RPAP2	20.4533333333333	34.4921467889908	0.753931942719823	0	0
57482	KIAA1211	37.3281300813008	62.914128440367	0.753120795304219	0	0
54209	TREM2	1.72723577235772	2.91091743119266	0.753008889595114	0	0
4302	MLLT6	21.2008943089431	35.725504587156	0.752829265388356	0	0
26115	TANC2	39.8717886178862	67.1856330275229	0.752784435166882	1	0
23271	CAMSAP2	44.169674796748	74.4121100917431	0.752481219324739	0	0
285172	FAM126B	21.0509756097561	35.4617064220183	0.752374863883971	0	0
119559	SFXN4	21.1226016260163	35.5808990825688	0.752315426746871	0	0
155066	ATP6V0E2	174.347642276423	293.648899082569	0.752125374533039	0	0
490	ATP2B1	88.0088617886179	148.175834862385	0.75158948202832	0	0
6873	TAF2	23.3074796747967	39.220495412844	0.750814750142008	0	0
55330	BLOC1S4	13.6762601626016	23.0120733944954	0.750717204222147	0	0
59345	GNB4	27.6643089430894	46.5318532110092	0.750192760468581	0	0
23528	ZNF281	46.6865040650407	78.5260366972477	0.750165522309556	0	0
11156	PTP4A3	20.3169105691057	34.1662568807339	0.749891160856606	0	0
94015	TTYH2	9.74373983739837	16.3839082568807	0.749732023766267	0	0
29967	LRP12	16.9360975609756	28.4750458715596	0.749596680852104	0	0
1010	CDH12	3.95642276422764	6.65192660550459	0.749575656878763	0	0
5893	RAD52	6.92268292682927	11.6384220183486	0.749492289039781	0	0
100507577	LOC100507577	11.5026829268293	19.3335412844037	0.749135517432556	0	0
4800	NFYA	15.1309756097561	25.4142201834862	0.748130951297035	0	0
10067	SCAMP3	62.5129268292683	104.947743119266	0.747444686495119	0	0
26039	SS18L1	26.4345528455285	44.3729174311927	0.747254487636117	0	0
23042	PDXDC1	22.069918699187	37.0406605504587	0.74702851152757	0	0
4335	MNT	21.0252845528455	35.2845504587156	0.746911303697593	0	0
29	ABR	49.6324390243902	83.2849724770642	0.746772853490656	0	1
55327	LIN7C	42.9778861788618	72.116880733945	0.746742470233222	0	0
5519	PPP2R1B	20.4413008130081	34.2935412844037	0.746449882993405	0	0
57415	C3orf14	136.080731707317	228.194055045872	0.745798403236619	0	0
3954	LETM1	17.6139837398374	29.5346055045872	0.745685102735983	0	1
3984	LIMK1	5.20040650406504	8.71833027522936	0.745427458248245	0	0
10079	ATP9A	68.6752032520325	115.131908256881	0.745426544667385	0	0
23635	SSBP2	97.0454471544715	162.649321100917	0.745032364355113	0	0
201514	ZNF584	8.23918699186992	13.8083486238532	0.744966903779948	0	0
51023	MRPS18C	31.3336585365854	52.5103853211009	0.744889552724337	0	0
11040	PIM2	4.21975609756098	7.07106422018349	0.744767748698412	0	0
2033	EP300	16.6019512195122	27.8199082568807	0.744764851433389	1	0
57863	CADM3	12.7918699186992	21.4317431192661	0.744522021111034	0	0
55140	ELP3	26.3041463414634	44.0697614678899	0.74449885740374	0	0
10570	DPYSL4	75.2227642276423	125.998495412844	0.744165278658216	0	0
317781	DDX51	11.869756097561	19.8739816513761	0.743590647715998	0	0
91860	CALML4	10.5573983739837	17.6755963302752	0.743504529011621	0	0
83933	HDAC10	2.78292682926829	4.658	0.743107662765545	0	0
10325	RRAGB	21.5852845528455	36.1261100917431	0.742993808197336	0	0
57662	CAMSAP3	10.9730894308943	18.361504587156	0.742714513458467	0	0
284352	PPP1R37	3.60170731707317	6.026	0.742519723604681	0	0
5834	PYGB	23.7462601626016	39.7159816513761	0.742019343592171	0	0
8013	NR4A3	5.14739837398374	8.60910091743119	0.742019137371526	0	0
5833	PCYT2	12.7193495934959	21.260495412844	0.741150314986663	0	0
54985	HCFC1R1	74.6473983739837	124.758642201835	0.740975871230085	0	0
55379	LRRC59	3.62463414634146	6.05763302752294	0.740918798490328	0	0
646405	TPTE2P1	9.48227642276423	15.8403119266055	0.740295389631276	0	0
54512	EXOSC4	66.8142276422764	111.583596330275	0.739897702420052	0	0
144983	HNRNPA1L2	9.38349593495935	15.6598899082569	0.73887664876974	0	0
153396	TMEM161B	19.339674796748	32.2743486238532	0.738824443065858	0	0
6837	MED22	29.0051219512195	48.398495412844	0.738654513339511	0	0
121512	FGD4	46.2974796747967	77.2458532110092	0.738523828180556	1	0
4781	NFIB	689.889268292683	1150.98748623853	0.738435424629316	1	0
29951	PDZRN4	2.85284552845528	4.75873394495413	0.738176165246779	0	0
163051	ZNF709	12.09	20.1650642201835	0.738043755750987	0	0
84542	KIAA1841	31.6620325203252	52.8038348623853	0.737888837506298	0	0
2044	EPHA5	61.5008943089431	102.556403669725	0.737738282663247	0	0
130026	ICA1L	51.9335772357724	86.5835596330275	0.737425510911298	0	0
79896	THNSL1	8.00048780487805	13.333871559633	0.736935863693881	0	0
7678	ZNF124	39.0793495934959	65.113504587156	0.736550333997047	0	0
92822	ZNF276	7.8449593495935	13.0635963302752	0.73571424023716	0	0
147179	WIPF2	24.7868292682927	41.2714495412844	0.735570376111698	0	0
54778	RNF111	14.880325203252	24.7762201834862	0.735550052966859	0	0
2664	GDI1	239.027073170732	397.979266055046	0.735519238201819	0	0
9724	UTP14C	17.8926829268293	29.7874862385321	0.73533665070533	0	0
55262	C7orf43	4.14048780487805	6.89157798165138	0.735033611683364	0	0
6711	SPTBN1	68.8663414634146	114.602403669725	0.73476636273561	1	0
2009	EML1	30.7649593495935	51.1856513761468	0.734451356963587	0	0
7407	VARS	29.6480487804878	49.3204220183486	0.73424798427947	0	0
549	AUH	12.7732520325203	21.245504587156	0.734031730767457	0	0
4660	PPP1R12B	16.4254471544715	27.3196330275229	0.734005458710837	0	0
151050	KANSL1L	4.78479674796748	7.95671559633027	0.733715390260649	0	0
79085	SLC25A23	17.5085365853659	29.1151743119266	0.733712752038326	0	0
54751	FBLIM1	9.05869918699187	15.0623853211009	0.733574455460292	0	0
51309	ARMCX1	53.4639837398374	88.850623853211	0.732814565458334	0	0
389906	LOC389906	13.7858536585366	22.9087155963303	0.732707968723942	0	0
162967	ZNF320	17.9865853658537	29.8666605504587	0.731614609639089	0	0
91151	TIGD7	8.03455284552845	13.3383486238532	0.731290422757673	0	0
84524	ZC3H8	37.2389430894309	61.8020550458716	0.730842684409447	0	0
4747	NEFL	4.29235772357724	7.12311926605505	0.730738831475861	0	0
7803	PTP4A1	119.913414634146	198.95047706422	0.730416297363103	0	0
10908	PNPLA6	8.63585365853659	14.3221467889908	0.729837057586372	0	0
80222	TARS2	10.7326829268293	17.7966422018349	0.729594302874315	0	0
3643	INSR	20.2022764227642	33.4959449541284	0.729468585151812	0	0
23187	PHLDB1	32.2422764227642	53.4552660550459	0.729378472592649	0	1
7791	ZYX	29.0252032520325	48.0904587155963	0.728444517818895	0	0
2872	MKNK2	14.9791056910569	24.8118899082569	0.728080136669717	0	0
1809	DPYSL3	270.800975609756	448.341559633028	0.727365301680402	0	0
9604	RNF14	16.0426016260163	26.5555596330275	0.727105810791053	0	0
10849	CD3EAP	3.98219512195122	6.59067889908257	0.72686317061138	0	0
4189	DNAJB9	35.0054471544715	57.9263853211009	0.726641206320656	0	0
26145	IRF2BP1	3.57032520325203	5.90284403669725	0.725354735611807	0	0
6521	SLC4A1	1.57756097560976	2.60801834862385	0.725258250555436	0	0
54453	RIN2	3.00406504065041	4.96614678899083	0.725210856408874	0	0
80267	EDEM3	14.6033333333333	24.1393027522936	0.725086291468236	1	0
162632	USP32P1	7.97008130081301	13.1744770642202	0.725079351990549	0	0
6275	S100A4	1.71577235772358	2.83601834862385	0.725008712495915	0	0
217	ALDH2	69.700325203252	115.20680733945	0.724988672803729	0	0
23195	MDN1	19.3975609756098	32.0610091743119	0.724944576270057	1	0
5604	MAP2K1	8.61040650406504	14.2254862385321	0.724324710738086	0	1
57472	CNOT6	25.1313008130081	41.4967155963303	0.723511805783855	0	0
10940	POP1	16.3186991869919	26.9434862385321	0.723410474010463	0	0
124961	ZFP3	10.4428455284553	17.2412293577982	0.723347767542789	0	0
1159	CKMT1B	3.47723577235772	5.74066055045872	0.723275858847387	0	0
51337	THEM6	17.1375609756098	28.2926055045872	0.723263243467306	0	0
1944	EFNA3	9.26674796747967	15.2939266055046	0.722823816204496	0	0
1741	DLG3	22.3816260162602	36.9282201834862	0.722408879806035	0	0
79631	EFTUD1	8.28178861788618	13.6590825688073	0.721846300936532	0	0
11282	MGAT4B	6.14260162601626	10.1297981651376	0.721683702415862	0	0
1951	CELSR3	25.0288617886179	41.2708990825688	0.721532183076232	0	1
3988	LIPA	9.38585365853659	15.4727155963303	0.721166552974347	0	0
128866	CHMP4B	9.17065040650406	15.1140733944954	0.720796571437209	0	0
100507171	BOLA3-AS1	31.0889430894309	51.2250275229358	0.720447283241038	0	0
64409	WBSCR17	5.95414634146341	9.81047706422018	0.720428612894417	0	0
11127	KIF3A	95.9043089430894	158.011211009174	0.720359380749419	0	0
10418	SPON1	2.07552845528455	3.41946788990826	0.720293130697804	0	0
63934	ZNF667	24.0581300813008	39.6344220183486	0.720229424618516	0	0
79176	FBXL15	42.3805691056911	69.8141834862385	0.720117203885466	0	0
23142	DCUN1D4	31.6643089430894	52.1584036697248	0.720042122256931	0	0
29035	C16orf72	10.8260975609756	17.8305688073394	0.719839432372468	0	0
91893	FDXACB1	8.1480487804878	13.4183119266055	0.71967666404346	0	0
9706	ULK2	17.8150406504065	29.3324770642202	0.71940313329369	0	0
56853	CELF4	23.6316260162602	38.9013944954128	0.719102972383328	1	0
9791	PTDSS1	36.1714634146341	59.5341467889908	0.718865419972167	0	0
55756	INTS9	10.9665040650407	18.044623853211	0.718465377650934	0	0
1303	COL12A1	10.3139837398374	16.9704587155963	0.718423885583459	0	0
79862	ZNF669	8.35227642276423	13.7422752293578	0.71837951811554	0	0
9278	ZBTB22	5.41227642276423	8.90359633027523	0.718152661123428	0	0
1114	CHGB	32.7366666666667	53.8427889908257	0.717845711433707	0	0
8408	ULK1	30.9294308943089	50.8657798165138	0.717715115131601	0	0
201627	DENND6A	11.0117073170732	18.1091559633028	0.717681136510936	0	0
9022	CLIC3	1.05365853658537	1.73271559633028	0.71762747086168	0	0
23246	BOP1	24.4882926829268	40.2554311926606	0.717091249157024	0	0
84060	RBM48	28.8843902439024	47.4805688073395	0.717047178893334	0	0
127933	UHMK1	7.80130081300813	12.8232844036697	0.716979215473006	0	0
2781	GNAZ	27.559756097561	45.2917064220184	0.716683775441637	0	0
9168	TMSB10	6317.2574796748	10381.7363486239	0.716677474971	0	0
83475	DOHH	4.89943089430894	8.0494128440367	0.716269372094263	0	0
1209	CLPTM1	5.46552845528455	8.97877064220183	0.71615693210369	0	0
57212	TP73-AS1	11.7831707317073	19.3504403669725	0.715638592815548	0	0
10363	HMG20A	27.669837398374	45.4379082568807	0.715582255634473	0	0
84668	FAM126A	35.3747154471545	58.0860550458716	0.715473308557868	0	0
3156	HMGCR	77.2321951219512	126.816935779817	0.715473141305927	0	0
8864	PER2	4.76878048780488	7.83003669724771	0.71539869362465	3+	0
30000	TNPO2	42.5450406504065	69.8247155963303	0.714746821246367	0	0
7204	TRIO	10.9380487804878	17.9499449541284	0.71462401861894	1	1
10228	STX6	14.1982113821138	23.2997981651376	0.714608259714632	0	0
5049	PAFAH1B2	84.4179674796748	138.515137614679	0.714421650444219	1	0
5641	LGMN	21.8642276422764	35.8582201834862	0.713731496205488	0	0
55176	SEC61A2	32.9494308943089	54.0341100917431	0.713616877311463	0	0
10765	KDM5B	79.9490243902439	131.08071559633	0.7133031201151	3+	0
2039	DMTN	3.21520325203252	5.27095412844037	0.713154195041769	0	0
84868	HAVCR2	1.74707317073171	2.86376146788991	0.712971298472762	0	0
57282	SLC4A10	14.360487804878	23.5387889908257	0.712935343151333	0	0
8497	PPFIA4	4.45243902439024	7.29609174311927	0.712528016542386	0	0
127829	ARL8A	31.5788617886179	51.7341100917431	0.712156640687148	0	0
8621	CDK13	20.9575609756098	34.3270642201835	0.71187565092211	0	0
10479	SLC9A6	13.7080487804878	22.4446055045872	0.711345508237198	0	0
10437	IFI30	2.66934959349594	4.36790825688073	0.710454292791145	1	0
84890	ADO	10.7126016260163	17.5252660550459	0.710127455630136	0	0
374928	ZNF773	8.58260162601626	14.0386055045872	0.709912695423136	0	0
51491	NOP16	30.2390243902439	49.4597247706422	0.709842617308261	0	0
55754	TMEM30A	18.2756097560976	29.8904770642202	0.70976638146056	0	0
2145	EZH1	15.120487804878	24.7299449541284	0.709754345102816	0	0
79585	CORO7	15.3694308943089	25.1334128440367	0.709542841507278	0	0
89792	GAL3ST3	13.3862601626016	21.8875779816514	0.709359360205764	0	0
9638	FEZ1	179.211300813008	293.012110091743	0.709298677391804	0	0
89890	KBTBD6	54.549756097561	89.132	0.708370732361785	0	0
28985	MCTS1	105.223902439024	171.893357798165	0.70805133671081	0	0
54386	TERF2IP	131.315040650407	214.462880733945	0.707695797398182	0	0
79648	MCPH1	21.0062601626016	34.2978165137615	0.707297398191902	0	0
23062	GGA2	12.2861788617886	20.0537431192661	0.706835255908918	0	0
5603	MAPK13	3.86016260162602	6.29979816513761	0.70664398843224	0	0
116372	LYPD1	13.6647154471545	22.2994678899083	0.706553867337103	0	0
4883	NPR3	7.82024390243902	12.7617798165138	0.706544039039133	0	0
9513	FXR2	21.2985365853659	34.7566605504587	0.7065351666335	0	0
10322	SMYD5	14.4865853658537	23.6393394495413	0.706472145863596	0	0
64320	RNF25	13.9613821138211	22.7804770642202	0.706356191079579	0	0
9746	CLSTN3	4.68422764227642	7.6423119266055	0.706197954484446	0	0
55226	NAT10	16.3547967479675	26.6819633027523	0.706150996109783	0	0
65997	RASL11B	23.4985365853659	38.3266605504587	0.705777386705811	0	0
51232	CRIM1	11.8912195121951	19.392128440367	0.705574480140027	0	0
25837	RAB26	4.60609756097561	7.51020183486238	0.70530671140698	0	0
55466	DNAJA4	11.1505691056911	18.1748073394495	0.704822726380567	0	0
54839	LRRC49	30.6465853658537	49.9147706422018	0.703740458921719	0	0
26260	FBXO25	34.1276422764228	55.560495412844	0.703118714725473	0	0
54811	ZNF562	34.26	55.7653394495413	0.702843552334238	0	0
90637	ZFAND2A	26.6765853658537	43.4077431192661	0.702378403410826	0	0
10217	CTDSPL	14.6076422764228	23.7661467889908	0.70218467674876	0	0
5160	PDHA1	99.6954471544716	162.199504587156	0.702169886165912	0	0
55700	MAP7D1	37.6986991869919	61.3157247706422	0.701742365398163	0	0
7090	TLE3	42.7513008130081	69.5242385321101	0.701547720269359	0	0
100128590	SLC8A1-AS1	7.91593495934959	12.8656330275229	0.700690779960022	0	0
8672	EIF4G3	42.5684552845528	69.1816330275229	0.700604329981256	0	0
23008	KLHDC10	26.1440650406504	42.4708440366973	0.699989302404392	1	0
4627	MYH9	11.3791869918699	18.4844036697248	0.699911015931056	0	0
57541	ZNF398	8.98959349593496	14.6000183486239	0.699642397701822	0	0
8643	PTCH2	4.24577235772358	6.89543119266055	0.699613749289354	0	0
5190	PEX6	10.3441463414634	16.7927706422018	0.699025689817767	0	0
5830	PEX5	4.96227642276423	8.05552293577982	0.698976144030816	0	0
5087	PBX1	179.358455284553	291.142825688073	0.698881310293303	1	0
220963	SLC16A9	13.5148780487805	21.9355412844037	0.698721813132864	0	0
10290	SPEG	11.0234959349593	17.890128440367	0.698581919731055	0	0
4297	KMT2A	114.260487804878	185.424587155963	0.698505962635576	3+	1
8085	KMT2D	10.7608943089431	17.4566788990826	0.697981133629747	0	1
54020	SLC37A1	7.15731707317073	11.6088623853211	0.697735803322025	0	0
84446	BRSK1	3.84943089430894	6.24159633027523	0.697269883894228	1	0
79874	RABEP2	5.77121951219512	9.35559633027523	0.696953408558998	0	0
64784	CRTC3	11.5477235772358	18.7139816513761	0.696508065321733	0	0
6660	SOX5	50.1636585365854	81.293247706422	0.696492955040121	1	0
57614	KIAA1468	9.40609756097561	15.2403853211009	0.696231177641276	0	0
114783	LMTK3	2.54723577235772	4.12570642201835	0.695708663478837	2	0
55275	VPS53	28.3667479674797	45.9433577981651	0.695655534763898	0	0
57654	UVSSA	10.6278861788618	17.2077614678899	0.695204749293021	0	0
100129842	ZNF737	23.8826829268293	38.6537981651376	0.694645267113003	0	0
7074	TIAM1	8.60878048780488	13.9331559633028	0.694641289783919	0	0
51804	SIX4	2.30170731707317	3.72522935779816	0.694624859876642	0	0
65998	C11orf95	63.5220325203252	102.742330275229	0.693701720225778	0	0
2045	EPHA7	27.8014634146341	44.9514128440367	0.693205635444144	0	0
3760	KCNJ3	6.6830081300813	10.8030458715596	0.692868596919221	0	0
60312	AFAP1	31.8573170731707	51.4863853211009	0.692566214552644	0	0
57333	RCN3	4.72008130081301	7.62543119266055	0.692007210022248	0	0
5578	PRKCA	20.3747967479675	32.8941834862385	0.691046834390754	0	0
254552	NUDT8	10.290325203252	16.6123669724771	0.690969070642294	0	0
113791	PIK3IP1	6.90373983739837	11.1405871559633	0.69037526709799	0	0
2170	FABP3	9.92276422764228	16.0082752293578	0.690003897188057	0	0
22848	AAK1	145.077723577236	234.045486238532	0.689962928557846	0	0
729723	DNAJC27-AS1	2.88365853658537	4.65126605504587	0.689723124727935	0	0
81846	SBF2	14.5526829268293	23.4695229357798	0.689503364207218	0	0
10307	APBB3	22.379756097561	36.0883669724771	0.689339548202605	0	0
441212	RP9P	42.8369918699187	69.0696697247706	0.689195151355742	0	0
137994	LETM2	5.75235772357724	9.27240366972477	0.688789978888684	0	0
126299	ZNF428	35.7269918699187	57.5788073394495	0.68852345844776	0	0
80067	DCAF17	5.84666666666667	9.42196330275229	0.688413370969697	0	0
26152	ZNF337	24.4138211382114	39.3254311926606	0.687764467748816	0	0
84916	CIRH1A	28.5972357723577	46.0577064220183	0.687566867816976	0	0
5452	POU2F2	30.7192682926829	49.4691376146789	0.687384896832019	0	0
165631	PARP15	27.4683739837398	44.2324403669725	0.687333328730216	0	0
56124	PCDHB12	5.28642276422764	8.50933944954128	0.686755340482447	0	0
10581	IFITM2	1.80170731707317	2.89977981651376	0.686578691049549	0	0
79596	RNF219	26.3565853658537	42.4141651376147	0.686382691081411	0	0
90550	MCU	9.69081300813008	15.5939082568807	0.686292941569667	0	0
199870	FAM76A	11.9126016260163	19.1674128440367	0.68616709802135	0	0
51463	GPR89B	11.8481300813008	19.0599449541284	0.685884567435699	0	0
4069	LYZ	2.0119512195122	3.23563302752294	0.685452665477809	0	0
1974	EIF4A2	283.065365853659	454.933798165138	0.684521379316539	0	0
55964	SEPT3	166.716016260163	267.935908256881	0.684495231943401	0	0
8417	STX7	55.0545528455285	88.4514495412844	0.684023910725176	0	0
139596	UPRT	12.5821951219512	20.2022201834862	0.683130210538397	0	0
80790	CMIP	16.6686178861789	26.762495412844	0.683078158166475	0	0
79415	C17orf62	72.9961788617886	117.14423853211	0.682393150152204	0	0
112840	WDR89	10.5930081300813	16.9976880733945	0.682226198530557	0	0
54958	TMEM160	127.77081300813	204.970293577982	0.681856518896758	0	0
54800	KLHL24	39.7077235772358	63.6978532110092	0.681825096306955	0	0
387032	ZKSCAN4	7.01284552845528	11.2491743119266	0.68174725636889	0	0
23077	MYCBP2	62.0131707317073	99.4559633027523	0.681483220204952	0	0
374354	NHLRC2	2.5869918699187	4.14807339449541	0.681165900791581	1	0
[truncated: 9,179 more rows]
