# Supplementary material for: Coexpression enrichment analysis at the single-cell level reveals convergent defects in neural progenitor cells and their cell-type transitions in neurodevelopmental disorders
Source: HighWire-hosted journal article supplement (doi:10.1101/gr.254987.119), 2020-06-01
Supplement: Supplemental_Table_S4.xlsx [file Supplemental_Table_S4.xlsx]

## Sheet: Supplemental Table S4
Supplemental Table S4. GO correlation analysis of dnLoF-ASD and dnMis-Epi genes and GO expression change analysis during the cell-type transition.
(A,B) GO positive correlation analysis of dnLoF-ASD (A) and dnMis-Epi genes (B) and GO expression increase analysis during the vRG-to-IPC transition at GW10.
(C,D) GO negative correlation analysis of dnLoF-ASD (C) and dnMis-Epi genes (D) and GO expression decrease analysis during the vRG-to-IPC transition at GW10.

## Sheet: Supplemental Table S4A
Supplemental Table S4A. GO positive correlation analysis of dnLoF-ASD genes and GO expression increase analysis during the vRG-to-IPC transition at GW10.
Column "GOBP ID": GO biological process ID.
Columns "Average Spearman’s correlation", "P value", "FDR": GO positive correlation analysis result.
Columns "Average log2(fold change, IPCs/vRG)", "P value", "FDR": GO expression increase analysis result.
Significant GO terms in both GO positive correlation and expression increase analyses.
GOBP ID	Name	Average Spearman’s correlation	P value	FDR	Average log2(fold change, IPCs/vRG)	P value	FDR
GO:0048699	generation of neurons	0.141143	1.45029e-18	5.24715e-15	0.578037	2.11579e-12	1.38031e-09
GO:0022008	neurogenesis	0.140287	3.11261e-18	5.63072e-15	0.559975	6.25553e-12	2.44276e-09
GO:0030182	neuron differentiation	0.14286	6.22718e-17	7.50998e-14	0.631968	2.94759e-13	1.06644e-09
GO:0048666	neuron development	0.144272	2.91087e-16	2.63288e-13	0.646362	1.27181e-12	1.38031e-09
GO:0031175	neuron projection development	0.145799	6.69128e-16	4.84181e-13	0.664599	2.28908e-12	1.38031e-09
GO:0048468	cell development	0.138114	9.16911e-16	5.52897e-13	0.488507	6.19356e-08	1.49389e-05
GO:0061564	axon development	0.149581	3.19566e-15	1.6517e-12	0.702623	5.30471e-12	2.44276e-09
GO:0048812	neuron projection morphogenesis	0.148294	5.62763e-15	2.5451e-12	0.702089	1.14808e-12	1.38031e-09
GO:0048667	cell morphogenesis involved in neuron differentiation	0.148479	1.24927e-14	5.02208e-12	0.716875	1.66309e-12	1.38031e-09
GO:0007409	axonogenesis	0.148985	1.93852e-14	7.01358e-12	0.712185	6.46393e-12	2.44276e-09
GO:0000904	cell morphogenesis involved in differentiation	0.145492	8.09577e-14	2.66277e-11	0.647285	1.38742e-10	4.56334e-08
GO:0051056	regulation of small GTPase mediated signal transduction	0.145349	1.29491e-12	3.90417e-10	0.603706	3.84249e-06	0.000448456
GO:0046578	regulation of Ras protein signal transduction	0.147385	2.49391e-12	6.94076e-10	0.622422	6.91891e-06	0.000695351
GO:0007268	synaptic transmission	0.146178	8.70064e-12	2.24849e-09	0.741026	6.75169e-12	2.44276e-09
GO:0031344	regulation of cell projection organization	0.150431	9.74722e-12	2.35103e-09	0.679938	1.40126e-07	3.12362e-05
GO:0045664	regulation of neuron differentiation	0.149173	1.26064e-11	2.85062e-09	0.595955	8.73569e-06	0.000790143
GO:0051960	regulation of nervous system development	0.144484	2.83973e-11	6.04362e-09	0.598612	3.76514e-07	6.48679e-05
GO:0007411	axon guidance	0.14782	6.07161e-11	1.15616e-08	0.711263	8.66993e-10	2.41291e-07
GO:0097485	neuron projection guidance	0.14782	6.07161e-11	1.15616e-08	0.711263	8.66993e-10	2.41291e-07
GO:0043087	regulation of GTPase activity	0.141768	7.88452e-11	1.32029e-08	0.651532	1.55404e-07	3.12362e-05
GO:0050793	regulation of developmental process	0.133471	7.95781e-11	1.32029e-08	0.435068	1.63624e-05	0.00123331
GO:0030030	cell projection organization	0.137152	8.62999e-11	1.35754e-08	0.470997	1.15081e-05	0.00094628
GO:0033124	regulation of GTP catabolic process	0.141321	1.43125e-10	2.1322e-08	0.647613	2.18129e-07	4.15364e-05
GO:0045595	regulation of cell differentiation	0.135741	1.47333e-10	2.1322e-08	0.448803	0.000118148	0.00657629
GO:0010975	regulation of neuron projection development	0.151933	2.13099e-10	2.96535e-08	0.665818	5.24253e-06	0.000557867
GO:0032318	regulation of Ras GTPase activity	0.147747	2.28976e-10	3.06828e-08	0.714148	3.59652e-07	6.48679e-05
GO:0050767	regulation of neurogenesis	0.144069	3.09974e-10	4.0053e-08	0.567159	1.18762e-05	0.000954847
GO:1900542	regulation of purine nucleotide metabolic process	0.137828	1.47841e-09	1.78296e-07	0.567899	2.5019e-06	0.000312134
GO:0048858	cell projection morphogenesis	0.13859	2.88979e-09	3.37266e-07	0.509504	4.34004e-06	0.000475827
GO:2000026	regulation of multicellular organismal development	0.134391	3.09378e-09	3.43045e-07	0.444133	0.000108918	0.00625502
GO:0007267	cell-cell signaling	0.138774	3.12894e-09	3.43045e-07	0.617853	1.20633e-08	3.11751e-06
GO:0022610	biological adhesion	0.140389	3.25605e-09	3.46482e-07	0.536521	9.16694e-07	0.0001442
GO:0040011	locomotion	0.134386	3.355e-09	3.46811e-07	0.514444	1.48541e-07	3.12362e-05
GO:0060284	regulation of cell development	0.139968	3.84012e-09	3.85932e-07	0.526014	5.51586e-05	0.00338244
GO:0006140	regulation of nucleotide metabolic process	0.136992	3.98781e-09	3.89943e-07	0.562039	4.20041e-06	0.000474908
GO:0007155	cell adhesion	0.140247	4.44611e-09	4.12462e-07	0.536804	9.70806e-07	0.000146349
GO:0030811	regulation of nucleotide catabolic process	0.13719	1.09416e-08	9.4505e-07	0.580075	6.87849e-06	0.000695351
GO:0000902	cell morphogenesis	0.136246	1.09707e-08	9.4505e-07	0.459831	5.16867e-05	0.00333933
GO:0033121	regulation of purine nucleotide catabolic process	0.137028	1.49904e-08	1.26128e-06	0.578749	8.34755e-06	0.000774396
GO:0050804	regulation of synaptic transmission	0.155269	2.22906e-08	1.79216e-06	0.721916	0.000192634	0.00981618
GO:0043547	positive regulation of GTPase activity	0.144716	2.53151e-08	1.99109e-06	0.746216	7.53687e-07	0.000123947
GO:0032990	cell part morphogenesis	0.136598	3.11047e-08	2.34451e-06	0.483441	1.85317e-05	0.00136832
GO:0009118	regulation of nucleoside metabolic process	0.136537	3.44341e-08	2.5425e-06	0.571349	1.28731e-05	0.0010125
GO:0006935	chemotaxis	0.138114	1.02989e-07	6.90024e-06	0.565574	1.36955e-06	0.000190578
GO:0042330	taxis	0.138114	1.02989e-07	6.90024e-06	0.565574	1.36955e-06	0.000190578
GO:0031346	positive regulation of cell projection organization	0.149929	1.61736e-07	1.0266e-05	0.71914	9.47704e-06	0.000836291
GO:0009894	regulation of catabolic process	0.130806	1.98162e-07	1.17063e-05	0.49532	1.60575e-05	0.00123331
GO:0006928	cellular component movement	0.13037	7.88184e-07	4.01641e-05	0.454998	2.28743e-06	0.000295569
GO:0031329	regulation of cellular catabolic process	0.130025	9.36276e-07	4.51659e-05	0.504402	2.44659e-05	0.00167014
GO:0007610	behavior	0.138242	2.20195e-06	9.37252e-05	0.665533	1.09562e-05	0.000921849
Significant GO terms only in GO positive correlation analysis.
GOBP ID	Name	Average Spearman’s correlation	P value	FDR	Average log2(fold change, IPCs/vRG)	P value	FDR
GO:0006468	protein phosphorylation	0.139926	8.02828e-11	1.32029e-08	0.369407	0.0159448	0.207512
GO:0048598	embryonic morphogenesis	0.144683	1.21051e-09	1.51022e-07	0.445313	0.0306806	0.291345
GO:1902531	regulation of intracellular signal transduction	0.130959	4.09635e-09	3.90015e-07	0.412516	0.000744097	0.0256394
GO:0009887	organ morphogenesis	0.139828	5.25325e-09	4.75157e-07	0.513137	0.0011171	0.0338041
GO:0007167	enzyme linked receptor protein signaling pathway	0.133851	1.74743e-08	1.43686e-06	0.417324	0.00468091	0.0967744
GO:0018107	peptidyl-threonine phosphorylation	0.190425	2.86285e-08	2.20378e-06	0.537862	0.0397028	0.327484
GO:0003008	system process	0.134251	5.11155e-08	3.69872e-06	0.460263	0.000926363	0.0301944
GO:0018210	peptidyl-threonine modification	0.185476	6.51075e-08	4.6188e-06	0.501063	0.0497985	0.360995
GO:0032879	regulation of localization	0.129108	1.00028e-07	6.90024e-06	0.388173	0.000282654	0.0131108
GO:0050877	neurological system process	0.1391	1.21139e-07	7.96875e-06	0.538748	0.000271926	0.012777
GO:0070848	response to growth factor	0.134727	1.46279e-07	9.45066e-06	0.390022	0.0576288	0.395638
GO:0048729	tissue morphogenesis	0.140186	1.7061e-07	1.05096e-05	0.490304	0.00639213	0.119975
GO:0008038	neuron recognition	0.195146	1.71383e-07	1.05096e-05	0.818115	0.00392752	0.0879147
GO:0071363	cellular response to growth factor stimulus	0.134786	1.76186e-07	1.0624e-05	0.394064	0.0545883	0.384797
GO:0048167	regulation of synaptic plasticity	0.164538	2.00606e-07	1.17063e-05	0.840263	0.000365021	0.015722
GO:0032989	cellular component morphogenesis	0.133709	2.12613e-07	1.22101e-05	0.428181	0.000269223	0.012777
GO:0016055	Wnt signaling pathway	0.14927	2.64385e-07	1.4946e-05	0.467455	0.0146564	0.197126
GO:0002009	morphogenesis of an epithelium	0.14145	3.44183e-07	1.91577e-05	0.490684	0.0112401	0.172317
GO:0048704	embryonic skeletal system morphogenesis	0.188755	3.68739e-07	2.02136e-05	0.624325	0.227892	0.746436
GO:0007417	central nervous system development	0.131983	4.73761e-07	2.55831e-05	0.346391	0.0698528	0.430989
GO:0007169	transmembrane receptor protein tyrosine kinase signaling pathway	0.133773	5.4291e-07	2.8886e-05	0.468335	0.000911853	0.0299917
GO:0010769	regulation of cell morphogenesis involved in differentiation	0.147229	5.52726e-07	2.89821e-05	0.53675	0.00395716	0.0879147
GO:0016569	covalent chromatin modification	0.1394	7.59455e-07	3.9253e-05	0.321692	0.157604	0.637235
GO:0048705	skeletal system morphogenesis	0.157927	8.40759e-07	4.22481e-05	0.375959	0.435751	0.936247
GO:0022603	regulation of anatomical structure morphogenesis	0.135404	8.90784e-07	4.41487e-05	0.423989	0.00645117	0.120222
GO:0051049	regulation of transport	0.130225	9.0942e-07	4.44632e-05	0.38982	0.00200899	0.0511867
GO:0071495	cellular response to endogenous stimulus	0.131305	9.77304e-07	4.62129e-05	0.411854	0.00492784	0.100163
GO:0009790	embryo development	0.13262	9.83525e-07	4.62129e-05	0.270157	0.461159	0.952892
GO:0022604	regulation of cell morphogenesis	0.139994	1.09328e-06	5.07113e-05	0.49675	0.00161252	0.0438655
GO:0016570	histone modification	0.138897	1.61168e-06	7.38106e-05	0.31665	0.165233	0.646091
GO:0009952	anterior/posterior pattern specification	0.153388	1.8508e-06	8.37025e-05	0.499413	0.0406223	0.328741
GO:0038179	neurotrophin signaling pathway	0.139417	1.88162e-06	8.40455e-05	0.521285	0.00196626	0.0504534
GO:0007173	epidermal growth factor receptor signaling pathway	0.145352	1.98206e-06	8.63988e-05	0.629244	0.0011212	0.0338041
GO:0038127	ERBB signaling pathway	0.145352	1.98206e-06	8.63988e-05	0.629244	0.0011212	0.0338041
GO:0016337	single organismal cell-cell adhesion	0.151734	2.07222e-06	8.92536e-05	0.634711	0.00045229	0.0181906
GO:0016358	dendrite development	0.167492	2.26422e-06	9.52551e-05	0.67504	0.000457957	0.0181906
Significant GO terms only in GO expression increase analysis.
GOBP ID	Name	Average Spearman’s correlation	P value	FDR	Average log2(fold change, IPCs/vRG)	P value	FDR
GO:0050808	synapse organization	0.156021	6.80589e-06	0.000248724	0.877078	1.73431e-06	0.000232398
GO:0007626	locomotory behavior	0.131978	0.00959535	0.0582483	0.891014	2.95408e-06	0.000356262
GO:0016192	vesicle-mediated transport	0.125625	0.000753848	0.00834074	0.469245	7.25254e-06	0.000709181
GO:0007270	neuron-neuron synaptic transmission	0.144884	0.0167839	0.0890382	1.28788	7.63363e-06	0.000726802
GO:0086010	membrane depolarization during action potential	0.198619	0.0013169	0.0128079	1.95461	9.74918e-06	0.000839822
GO:0035249	synaptic transmission, glutamatergic	0.164361	0.00376593	0.0285642	1.40931	1.94511e-05	0.00140748
GO:0010976	positive regulation of neuron projection development	0.158914	1.83783e-05	0.00058843	0.940227	2.23503e-05	0.00158555
GO:0016477	cell migration	0.129482	0.000116802	0.00230273	0.510094	2.33581e-05	0.00162519
GO:0098609	cell-cell adhesion	0.138217	0.0149077	0.0815979	0.829808	4.00322e-05	0.00268216
GO:0070588	calcium ion transmembrane transport	0.152342	0.000258687	0.00401687	0.854386	5.14854e-05	0.00333933
GO:0051899	membrane depolarization	0.160279	0.00011711	0.00230273	0.88911	5.27296e-05	0.00334694
GO:0051489	regulation of filopodium assembly	0.185044	5.03623e-05	0.00128317	1.13078	5.42329e-05	0.00338244
GO:0007215	glutamate receptor signaling pathway	0.198631	7.94003e-06	0.000281638	1.30324	6.34928e-05	0.00382861
GO:0030001	metal ion transport	0.12789	0.0122793	0.0707431	0.554797	6.5448e-05	0.00388182
GO:0034220	ion transmembrane transport	0.114462	0.50134	0.866627	0.569431	9.52455e-05	0.00555804
GO:0044708	single-organism behavior	0.136005	0.00011234	0.00225803	0.677218	0.000110973	0.00627344
GO:0030036	actin cytoskeleton organization	0.129549	0.000442149	0.00585969	0.479363	0.000127002	0.00696204
GO:0030534	adult behavior	0.127268	0.0420816	0.1744	0.86844	0.000166757	0.00885954
GO:0055085	transmembrane transport	0.115994	0.483023	0.848608	0.480799	0.000169793	0.00885954
GO:0071867	response to monoamine	0.193306	0.00305754	0.0239441	1.57072	0.000171412	0.00885954
GO:0071869	response to catecholamine	0.193306	0.00305754	0.0239441	1.57072	0.000171412	0.00885954

## Sheet: Supplemental Table S4B
Supplemental Table S4B. GO positive correlation analysis of dnMis-Epi genes and GO expression increase analysis during the vRG-to-IPC transition at GW10.
Column "GOBP ID": GO biological process ID.
Columns "Average Spearman’s correlation", "P value", "FDR": GO positive correlation analysis result.
Columns "Average log2(fold change, IPCs/vRG)", "P value", "FDR": GO expression increase analysis result.
Significant GO terms in both GO positive correlation and expression increase analyses.
GOBP ID	Name	Average Spearman’s correlation	P value	FDR	Average log2(fold change, IPCs/vRG)	P value	FDR
GO:0048699	generation of neurons	0.129612	1.89519e-17	6.8568e-14	0.578037	2.11579e-12	1.38031e-09
GO:0022008	neurogenesis	0.128913	4.91394e-17	8.88932e-14	0.559975	6.25553e-12	2.44276e-09
GO:0030182	neuron differentiation	0.131689	3.60395e-16	4.34637e-13	0.631968	2.94759e-13	1.06644e-09
GO:0048666	neuron development	0.132692	3.09155e-15	2.79631e-12	0.646362	1.27181e-12	1.38031e-09
GO:0048468	cell development	0.12702	5.76002e-15	4.16795e-12	0.488507	6.19356e-08	1.49389e-05
GO:0031175	neuron projection development	0.133474	3.37382e-14	2.03441e-11	0.664599	2.28908e-12	1.38031e-09
GO:0061564	axon development	0.137233	5.44219e-14	2.81284e-11	0.702623	5.30471e-12	2.44276e-09
GO:0048812	neuron projection morphogenesis	0.136109	6.63191e-14	2.99928e-11	0.702089	1.14808e-12	1.38031e-09
GO:0048667	cell morphogenesis involved in neuron differentiation	0.136319	1.65858e-13	6.6675e-11	0.716875	1.66309e-12	1.38031e-09
GO:0007409	axonogenesis	0.136598	4.49197e-13	1.62519e-10	0.712185	6.46393e-12	2.44276e-09
GO:0000904	cell morphogenesis involved in differentiation	0.133379	1.54195e-12	5.07163e-10	0.647285	1.38742e-10	4.56334e-08
GO:0046578	regulation of Ras protein signal transduction	0.135571	2.09417e-11	6.31392e-09	0.622422	6.91891e-06	0.000695351
GO:0007268	synaptic transmission	0.134742	2.46145e-11	6.8504e-09	0.741026	6.75169e-12	2.44276e-09
GO:0051056	regulation of small GTPase mediated signal transduction	0.133105	3.22796e-11	8.34198e-09	0.603706	3.84249e-06	0.000448456
GO:0051960	regulation of nervous system development	0.132719	5.73712e-11	1.38117e-08	0.598612	3.76514e-07	6.48679e-05
GO:0043087	regulation of GTPase activity	0.131588	6.10798e-11	1.38117e-08	0.651532	1.55404e-07	3.12362e-05
GO:0033124	regulation of GTP catabolic process	0.131257	1.04473e-10	2.22343e-08	0.647613	2.18129e-07	4.15364e-05
GO:0045664	regulation of neuron differentiation	0.136584	1.11118e-10	2.23348e-08	0.595955	8.73569e-06	0.000790143
GO:0032318	regulation of Ras GTPase activity	0.137289	1.7675e-10	3.36569e-08	0.714148	3.59652e-07	6.48679e-05
GO:0007411	axon guidance	0.135898	3.28951e-10	5.66735e-08	0.711263	8.66993e-10	2.41291e-07
GO:0097485	neuron projection guidance	0.135898	3.28951e-10	5.66735e-08	0.711263	8.66993e-10	2.41291e-07
GO:0031344	regulation of cell projection organization	0.137259	4.19138e-10	6.89292e-08	0.679938	1.40126e-07	3.12362e-05
GO:0050767	regulation of neurogenesis	0.132431	4.44215e-10	6.9877e-08	0.567159	1.18762e-05	0.000954847
GO:1900542	regulation of purine nucleotide metabolic process	0.128009	7.93098e-10	1.13404e-07	0.567899	2.5019e-06	0.000312134
GO:0045595	regulation of cell differentiation	0.124404	8.14956e-10	1.13404e-07	0.448803	0.000118148	0.00657629
GO:0030030	cell projection organization	0.125971	9.23239e-10	1.23714e-07	0.470997	1.15081e-05	0.00094628
GO:0010975	regulation of neuron projection development	0.139706	1.40501e-09	1.81547e-07	0.665818	5.24253e-06	0.000557867
GO:0006140	regulation of nucleotide metabolic process	0.127305	2.03829e-09	2.54294e-07	0.562039	4.20041e-06	0.000474908
GO:0050793	regulation of developmental process	0.121912	2.95676e-09	3.45082e-07	0.435068	1.63624e-05	0.00123331
GO:0007267	cell-cell signaling	0.127953	5.3516e-09	5.8673e-07	0.617853	1.20633e-08	3.11751e-06
GO:0040011	locomotion	0.123973	5.53684e-09	5.89185e-07	0.514444	1.48541e-07	3.12362e-05
GO:0048858	cell projection morphogenesis	0.127761	6.36782e-09	6.58251e-07	0.509504	4.34004e-06	0.000475827
GO:0060284	regulation of cell development	0.128646	7.29737e-09	7.33386e-07	0.526014	5.51586e-05	0.00338244
GO:0043547	positive regulation of GTPase activity	0.134872	9.02504e-09	8.82503e-07	0.746216	7.53687e-07	0.000123947
GO:0030811	regulation of nucleotide catabolic process	0.127433	9.27113e-09	8.82709e-07	0.580075	6.87849e-06	0.000695351
GO:0022610	biological adhesion	0.129032	1.02973e-08	9.55273e-07	0.536521	9.16694e-07	0.0001442
GO:0033121	regulation of purine nucleotide catabolic process	0.127362	1.11638e-08	1.00977e-06	0.578749	8.34755e-06	0.000774396
GO:0007155	cell adhesion	0.128981	1.20775e-08	1.06577e-06	0.536804	9.70806e-07	0.000146349
GO:0009118	regulation of nucleoside metabolic process	0.126967	2.20962e-08	1.90343e-06	0.571349	1.28731e-05	0.0010125
GO:2000026	regulation of multicellular organismal development	0.123167	2.48868e-08	2.09396e-06	0.444133	0.000108918	0.00625502
GO:0000902	cell morphogenesis	0.124976	6.27687e-08	5.0466e-06	0.459831	5.16867e-05	0.00333933
GO:0032990	cell part morphogenesis	0.125885	7.75891e-08	6.10255e-06	0.483441	1.85317e-05	0.00136832
GO:0050804	regulation of synaptic transmission	0.140979	1.77728e-07	1.34895e-05	0.721916	0.000192634	0.00981618
GO:0006935	chemotaxis	0.127049	5.38716e-07	3.6094e-05	0.565574	1.36955e-06	0.000190578
GO:0042330	taxis	0.127049	5.38716e-07	3.6094e-05	0.565574	1.36955e-06	0.000190578
GO:0006928	cellular component movement	0.120456	7.41068e-07	4.54438e-05	0.454998	2.28743e-06	0.000295569
GO:0009894	regulation of catabolic process	0.120082	1.75886e-06	9.49783e-05	0.49532	1.60575e-05	0.00123331
Significant GO terms only in GO positive correlation analysis.
GOBP ID	Name	Average Spearman’s correlation	P value	FDR	Average log2(fold change, IPCs/vRG)	P value	FDR
GO:0048598	embryonic morphogenesis	0.134002	7.52914e-10	1.13404e-07	0.445313	0.0306806	0.291345
GO:0006468	protein phosphorylation	0.127372	2.89106e-09	3.45082e-07	0.369407	0.0159448	0.207512
GO:0009887	organ morphogenesis	0.129313	3.32112e-09	3.75494e-07	0.513137	0.0011171	0.0338041
GO:1902531	regulation of intracellular signal transduction	0.120166	5.48236e-08	4.508e-06	0.412516	0.000744097	0.0256394
GO:0003008	system process	0.123205	1.78966e-07	1.34895e-05	0.460263	0.000926363	0.0301944
GO:0002009	morphogenesis of an epithelium	0.131019	3.1508e-07	2.32645e-05	0.490684	0.0112401	0.172317
GO:0007167	enzyme linked receptor protein signaling pathway	0.122473	4.43413e-07	3.20854e-05	0.417324	0.00468091	0.0967744
GO:0009952	anterior/posterior pattern specification	0.144084	4.71562e-07	3.34532e-05	0.499413	0.0406223	0.328741
GO:0050877	neurological system process	0.126896	4.89185e-07	3.4036e-05	0.538748	0.000271926	0.012777
GO:0018107	peptidyl-threonine phosphorylation	0.165241	6.29321e-07	4.10327e-05	0.537862	0.0397028	0.327484
GO:0048729	tissue morphogenesis	0.128705	6.35111e-07	4.10327e-05	0.490304	0.00639213	0.119975
GO:0008038	neuron recognition	0.177311	6.66287e-07	4.22917e-05	0.818115	0.00392752	0.0879147
GO:0016055	Wnt signaling pathway	0.136468	6.88579e-07	4.29531e-05	0.467455	0.0146564	0.197126
GO:0009790	embryo development	0.122623	8.38511e-07	5.05622e-05	0.270157	0.461159	0.952892
GO:0032989	cellular component morphogenesis	0.122779	9.10449e-07	5.37122e-05	0.428181	0.000269223	0.012777
GO:0010769	regulation of cell morphogenesis involved in differentiation	0.135583	9.24745e-07	5.37122e-05	0.53675	0.00395716	0.0879147
GO:0016569	covalent chromatin modification	0.127772	9.35288e-07	5.37122e-05	0.321692	0.157604	0.637235
GO:0032879	regulation of localization	0.118161	9.93959e-07	5.61898e-05	0.388173	0.000282654	0.0131108
GO:0048167	regulation of synaptic plasticity	0.150274	1.01081e-06	5.62633e-05	0.840263	0.000365021	0.015722
GO:0018210	peptidyl-threonine modification	0.161954	1.073e-06	5.88197e-05	0.501063	0.0497985	0.360995
Significant GO terms only in GO expression increase analysis.
GOBP ID	Name	Average Spearman’s correlation	P value	FDR	Average log2(fold change, IPCs/vRG)	P value	FDR
GO:0050808	synapse organization	0.142975	5.637e-06	0.000252482	0.877078	1.73431e-06	0.000232398
GO:0007626	locomotory behavior	0.120919	0.0143303	0.0844413	0.891014	2.95408e-06	0.000356262
GO:0016192	vesicle-mediated transport	0.116731	0.000344237	0.0057394	0.469245	7.25254e-06	0.000709181
GO:0007270	neuron-neuron synaptic transmission	0.136361	0.0241949	0.124342	1.28788	7.63363e-06	0.000726802
GO:0031346	positive regulation of cell projection organization	0.135827	4.33845e-06	0.000205878	0.71914	9.47704e-06	0.000836291
GO:0086010	membrane depolarization during action potential	0.180496	0.000896714	0.0116283	1.95461	9.74918e-06	0.000839822
GO:0007610	behavior	0.127353	2.43283e-06	0.000125743	0.665533	1.09562e-05	0.000921849
GO:0035249	synaptic transmission, glutamatergic	0.153043	0.00428979	0.0357614	1.40931	1.94511e-05	0.00140748
GO:0010976	positive regulation of neuron projection development	0.14744	4.00392e-05	0.00118739	0.940227	2.23503e-05	0.00158555
GO:0016477	cell migration	0.119642	0.000107691	0.00249761	0.510094	2.33581e-05	0.00162519
GO:0031329	regulation of cellular catabolic process	0.119619	5.85268e-06	0.00025512	0.504402	2.44659e-05	0.00167014
GO:0098609	cell-cell adhesion	0.12681	0.0291911	0.141383	0.829808	4.00322e-05	0.00268216
GO:0070588	calcium ion transmembrane transport	0.134526	0.00267161	0.0258446	0.854386	5.14854e-05	0.00333933
GO:0051899	membrane depolarization	0.151946	1.32338e-05	0.000493605	0.88911	5.27296e-05	0.00334694
GO:0051489	regulation of filopodium assembly	0.163126	0.000538855	0.00782963	1.13078	5.42329e-05	0.00338244
GO:0007215	glutamate receptor signaling pathway	0.177061	7.05137e-05	0.00186218	1.30324	6.34928e-05	0.00382861
GO:0030001	metal ion transport	0.117698	0.0134072	0.0802107	0.554797	6.5448e-05	0.00388182
GO:0034220	ion transmembrane transport	0.107084	0.351036	0.747958	0.569431	9.52455e-05	0.00555804
GO:0044708	single-organism behavior	0.125652	9.13284e-05	0.0022478	0.677218	0.000110973	0.00627344
GO:0030036	actin cytoskeleton organization	0.116691	0.00690212	0.0503465	0.479363	0.000127002	0.00696204
GO:0030534	adult behavior	0.119769	0.0331738	0.156076	0.86844	0.000166757	0.00885954
GO:0055085	transmembrane transport	0.107404	0.447743	0.85741	0.480799	0.000169793	0.00885954
GO:0071867	response to monoamine	0.182488	0.00245705	0.0243551	1.57072	0.000171412	0.00885954
GO:0071869	response to catecholamine	0.182488	0.00245705	0.0243551	1.57072	0.000171412	0.00885954

## Sheet: Supplemental Table S4C
Supplemental Table S4C. GO negative correlation analysis of dnLoF-ASD genes and GO expression decrease analysis during the vRG-to-IPC transition at GW10.
Column "GOBP ID": GO biological process ID.
Columns "Average Spearman’s correlation", "P value", "FDR": GO negative correlation analysis result.
Columns "Average log2(fold change, IPCs/vRG)", "P value", "FDR": GO expression decrease analysis result.
Significant GO terms in both GO negative correlation and expression decrease analyses.
GOBP ID	Name	Average Spearman’s correlation	P value	FDR	Average log2(fold change, IPCs/vRG)	P value	FDR
GO:0006259	DNA metabolic process	0.0916937	8.2836e-12	1.998e-09	0.0228392	1.09543e-07	7.92652e-05
GO:0055114	oxidation-reduction process	0.0915637	2.84087e-11	5.776e-09	0.112078	0.000129462	0.00851624
GO:0044774	mitotic DNA integrity checkpoint	0.0496225	3.90639e-11	7.43859e-09	-0.164793	7.9637e-05	0.00678134
GO:0007093	mitotic cell cycle checkpoint	0.0659677	4.17571e-11	7.55387e-09	-0.0765418	2.10179e-05	0.00326205
GO:0000278	mitotic cell cycle	0.093267	6.31674e-11	1.03882e-08	0.0298127	1.28401e-08	4.64555e-05
GO:0006396	RNA processing	0.0944812	2.62558e-10	3.51827e-08	0.0594197	3.0041e-05	0.00350607
GO:0006412	translation	0.0887457	7.94569e-10	7.98541e-08	-0.0198489	3.30557e-05	0.00373736
GO:1903047	mitotic cell cycle process	0.0940785	2.68754e-09	2.06883e-07	0.0414301	1.78403e-07	0.000107577
GO:0034660	ncRNA metabolic process	0.0883901	2.80931e-09	2.0743e-07	-0.0322417	4.67653e-06	0.00153815
GO:0022616	DNA strand elongation	0.0375869	3.11449e-09	2.20946e-07	-0.445309	1.05108e-05	0.0027163
GO:0006271	DNA strand elongation involved in DNA replication	0.0362362	3.62095e-09	2.47181e-07	-0.408832	2.61469e-05	0.00326205
GO:0010948	negative regulation of cell cycle process	0.079196	5.86947e-09	3.93255e-07	-0.0271501	4.32758e-05	0.00447348
GO:1901991	negative regulation of mitotic cell cycle phase transition	0.0745885	6.21624e-09	4.08915e-07	-0.0754703	1.52113e-05	0.00297585
GO:1901988	negative regulation of cell cycle phase transition	0.0750266	7.62976e-09	4.84289e-07	-0.0645756	2.54196e-05	0.00326205
GO:0000075	cell cycle checkpoint	0.0798624	1.10094e-08	6.75117e-07	-0.00644322	8.4345e-05	0.00678134
GO:0034470	ncRNA processing	0.0900957	1.98552e-08	1.17764e-06	-0.0648717	1.79679e-05	0.00309562
GO:1901987	regulation of cell cycle phase transition	0.0841044	1.2935e-07	6.88218e-06	-0.105705	2.12045e-06	0.00076718
GO:1901990	regulation of mitotic cell cycle phase transition	0.0843269	2.42115e-07	1.16455e-05	-0.108782	1.59289e-06	0.000640342
GO:0006283	transcription-coupled nucleotide-excision repair	0.0526628	5.03215e-07	2.19353e-05	-0.379711	2.28743e-05	0.00326205
GO:0044770	cell cycle phase transition	0.0890277	6.18509e-07	2.54292e-05	0.0212935	9.88381e-05	0.00757386
GO:0048285	organelle fission	0.0969036	6.92342e-07	2.78321e-05	-0.0143925	9.94264e-08	7.92652e-05
GO:0044772	mitotic cell cycle phase transition	0.0893484	1.09321e-06	4.24971e-05	0.0215384	0.000104266	0.00758858
GO:0022402	cell cycle process	0.101033	1.10413e-06	4.24971e-05	0.0998696	5.17357e-06	0.00155983
GO:0000280	nuclear division	0.0968198	1.60407e-06	6.04534e-05	-0.0313814	4.88452e-08	7.56921e-05
GO:0006312	mitotic recombination	0.0566182	2.10824e-06	7.70466e-05	-0.550778	1.56277e-05	0.00297585
GO:0006289	nucleotide-excision repair	0.0732237	2.42168e-06	8.6749e-05	-0.188863	8.35363e-05	0.00678134
GO:0006260	DNA replication	0.0900706	2.51629e-06	8.91388e-05	-0.0655064	4.163e-05	0.00442992
Significant GO terms only in GO negative correlation analysis.
GOBP ID	Name	Average Spearman’s correlation	P value	FDR	Average log2(fold change, IPCs/vRG)	P value	FDR
GO:0022900	electron transport chain	0.0103523	8.33776e-28	2.0753e-24	-0.140059	0.000255098	0.0128187
GO:0022904	respiratory electron transport chain	0.0097124	1.14721e-27	2.0753e-24	-0.153582	0.000161502	0.0100426
GO:0045333	cellular respiration	0.037039	4.43099e-23	5.34377e-20	-0.0574426	0.000301591	0.0147454
GO:0006119	oxidative phosphorylation	0.0149551	1.00642e-16	9.10307e-14	-0.157721	0.00150209	0.0440173
GO:0006120	mitochondrial electron transport, NADH to ubiquinone	-0.00995053	6.71627e-16	4.8599e-13	-0.221424	0.00209664	0.0553698
GO:0042773	ATP synthesis coupled electron transport	0.00706842	1.56104e-15	8.06837e-13	-0.116291	0.00637093	0.105744
GO:0042775	mitochondrial ATP synthesis coupled electron transport	0.00706842	1.56104e-15	8.06837e-13	-0.116291	0.00637093	0.105744
GO:0051436	negative regulation of ubiquitin-protein ligase activity involved in mitotic cell cycle	0.0304858	2.248e-13	1.01666e-10	-0.13977	0.000851865	0.0289277
GO:0042590	antigen processing and presentation of exogenous peptide antigen via MHC class I	0.0304155	2.87692e-13	1.15652e-10	0.023968	0.0204482	0.217592
GO:0002479	antigen processing and presentation of exogenous peptide antigen via MHC class I, TAP-dependent	0.0295833	1.65514e-12	5.98829e-10	-0.00169588	0.0136002	0.164421
GO:0051352	negative regulation of ligase activity	0.0354872	2.03595e-12	6.13838e-10	-0.133183	0.000791191	0.0276173
GO:0051444	negative regulation of ubiquitin-protein transferase activity	0.0354872	2.03595e-12	6.13838e-10	-0.133183	0.000791191	0.0276173
GO:0031145	anaphase-promoting complex-dependent proteasomal ubiquitin-dependent protein catabolic process	0.0400014	3.6454e-12	1.01454e-09	-0.141292	0.000322959	0.015121
GO:0051439	regulation of ubiquitin-protein ligase activity involved in mitotic cell cycle	0.0397695	7.74751e-12	1.998e-09	-0.118154	0.000793865	0.0276173
GO:0015992	proton transport	0.0467922	1.67406e-11	3.78547e-09	-0.0315941	0.0110151	0.144393
GO:0006818	hydrogen transport	0.0485472	2.87363e-11	5.776e-09	0.00316379	0.0179622	0.197529
GO:0006091	generation of precursor metabolites and energy	0.0770228	5.22406e-11	9.0003e-09	0.209071	0.10001	0.533683
GO:0006521	regulation of cellular amino acid metabolic process	0.0263371	7.3851e-11	1.16171e-08	-0.0931332	0.0111973	0.145725
GO:0051437	positive regulation of ubiquitin-protein ligase activity involved in mitotic cell cycle	0.0400601	7.96546e-11	1.20079e-08	-0.099625	0.0021566	0.0561336
GO:1902600	hydrogen ion transmembrane transport	0.0430457	2.14863e-10	3.1095e-08	0.0197242	0.0363324	0.305699
GO:0044773	mitotic DNA damage checkpoint	0.0494226	2.61114e-10	3.51827e-08	-0.15615	0.000169353	0.0100426
GO:0033238	regulation of cellular amine metabolic process	0.0393072	3.50008e-10	4.26173e-08	0.06459	0.0608678	0.402595
GO:0072401	signal transduction involved in DNA integrity checkpoint	0.037854	3.88715e-10	4.26173e-08	-0.0895834	0.00536231	0.0973776
GO:0072413	signal transduction involved in mitotic cell cycle checkpoint	0.037854	3.88715e-10	4.26173e-08	-0.0895834	0.00536231	0.0973776
GO:0072422	signal transduction involved in DNA damage checkpoint	0.037854	3.88715e-10	4.26173e-08	-0.0895834	0.00536231	0.0973776
GO:1902402	signal transduction involved in mitotic DNA damage checkpoint	0.037854	3.88715e-10	4.26173e-08	-0.0895834	0.00536231	0.0973776
GO:1902403	signal transduction involved in mitotic DNA integrity checkpoint	0.037854	3.88715e-10	4.26173e-08	-0.0895834	0.00536231	0.0973776
GO:0051351	positive regulation of ligase activity	0.0485893	4.61719e-10	4.91324e-08	-0.0521316	0.00437951	0.086585
GO:0051443	positive regulation of ubiquitin-protein transferase activity	0.0462121	4.81889e-10	4.98135e-08	-0.00481065	0.00653261	0.106946
GO:0006977	DNA damage response, signal transduction by p53 class mediator resulting in cell cycle arrest	0.0374133	8.94555e-10	8.4575e-08	-0.0594398	0.0109265	0.144205
GO:0002474	antigen processing and presentation of peptide antigen via MHC class I	0.0502027	9.12539e-10	8.4575e-08	0.0430595	0.0267176	0.258461
GO:0072431	signal transduction involved in mitotic G1 DNA damage checkpoint	0.0384893	9.35047e-10	8.4575e-08	-0.0653333	0.00883016	0.128289
GO:1902400	intracellular signal transduction involved in G1 DNA damage checkpoint	0.0384893	9.35047e-10	8.4575e-08	-0.0653333	0.00883016	0.128289
GO:0000082	G1/S transition of mitotic cell cycle	0.067659	1.51318e-09	1.30349e-07	-0.0218797	0.000508647	0.0208545
GO:0044843	cell cycle G1/S phase transition	0.067659	1.51318e-09	1.30349e-07	-0.0218797	0.000508647	0.0208545
GO:0072395	signal transduction involved in cell cycle checkpoint	0.0409751	1.75387e-09	1.4757e-07	-0.0642693	0.00869877	0.128131
GO:0031571	mitotic G1 DNA damage checkpoint	0.043345	2.37584e-09	1.91018e-07	-0.0772904	0.00633144	0.105744
GO:0044819	mitotic G1/S transition checkpoint	0.043345	2.37584e-09	1.91018e-07	-0.0772904	0.00633144	0.105744
GO:0015980	energy derivation by oxidation of organic compounds	0.0791707	2.44298e-09	1.92146e-07	0.220271	0.181958	0.700771
GO:0051340	regulation of ligase activity	0.0557402	2.79857e-09	2.0743e-07	-0.0518794	0.0025121	0.0614346
GO:0006974	cellular response to DNA damage stimulus	0.0932322	3.00248e-09	2.1726e-07	0.0975939	0.000513004	0.0208545
GO:0051438	regulation of ubiquitin-protein transferase activity	0.0540197	3.21794e-09	2.23894e-07	-0.0110738	0.00372543	0.0801805
GO:0044783	G1 DNA damage checkpoint	0.0454092	6.51332e-09	4.20807e-07	-0.07779	0.00590852	0.103428
GO:0006281	DNA repair	0.0898805	8.12265e-09	5.06685e-07	0.0569818	0.000617903	0.0231244
GO:0031398	positive regulation of protein ubiquitination	0.0658409	1.60382e-08	9.67106e-07	0.000181256	0.00233276	0.0594362
GO:0031397	negative regulation of protein ubiquitination	0.0620417	2.48653e-08	1.45101e-06	-0.0154404	0.00308668	0.0724848
GO:0031570	DNA integrity checkpoint	0.0724126	3.23354e-08	1.85697e-06	-0.0302743	0.000741845	0.02684
GO:0008380	RNA splicing	0.085722	4.62519e-08	2.61468e-06	0.0339723	0.000587243	0.0226026
GO:0009123	nucleoside monophosphate metabolic process	0.0882552	5.0237e-08	2.79627e-06	0.118592	0.00955472	0.130043
GO:0016071	mRNA metabolic process	0.0937344	5.36215e-08	2.93943e-06	0.0856707	0.000925202	0.0304307
GO:0006364	rRNA processing	0.0823415	1.25346e-07	6.76867e-06	0.0276529	0.00403992	0.0825788
GO:0030330	DNA damage response, signal transduction by p53 class mediator	0.0573253	1.76513e-07	9.25543e-06	-0.0445993	0.007535	0.117003
GO:0007005	mitochondrion organization	0.0878	1.82473e-07	9.43125e-06	-0.00967761	0.000325991	0.015121
GO:0000077	DNA damage checkpoint	0.0728128	1.91887e-07	9.77814e-06	-0.00816931	0.00215435	0.0561336
GO:0046034	ATP metabolic process	0.0879324	1.98616e-07	9.98045e-06	0.137912	0.0328451	0.289838
GO:0009161	ribonucleoside monophosphate metabolic process	0.089557	2.06398e-07	1.02294e-05	0.12264	0.0151142	0.177543
GO:0000375	RNA splicing, via transesterification reactions	0.0793682	2.27213e-07	1.11089e-05	-0.00933294	0.000453422	0.0195296
GO:0006457	protein folding	0.0845494	2.44626e-07	1.16455e-05	0.0010064	0.00102041	0.03302
GO:0000377	RNA splicing, via transesterification reactions with bulged adenosine as nucleophile	0.0789993	2.60849e-07	1.20994e-05	-0.00830694	0.000538067	0.0211601
GO:0000398	mRNA splicing, via spliceosome	0.0789993	2.60849e-07	1.20994e-05	-0.00830694	0.000538067	0.0211601
GO:0022613	ribonucleoprotein complex biogenesis	0.0882676	2.66371e-07	1.21991e-05	0.030102	0.000441361	0.0192391
GO:0006310	DNA recombination	0.0841404	3.17776e-07	1.43714e-05	0.0126758	0.00308678	0.0724848
GO:0042254	ribosome biogenesis	0.0863703	4.10578e-07	1.81989e-05	0.030427	0.00368118	0.0797516
GO:0016072	rRNA metabolic process	0.0844458	4.12467e-07	1.81989e-05	0.0369802	0.00518795	0.0973776
GO:0015985	energy coupled proton transport, down electrochemical gradient	0.0083166	5.48439e-07	2.33442e-05	-0.015655	0.135524	0.619879
GO:0015986	ATP synthesis coupled proton transport	0.0083166	5.48439e-07	2.33442e-05	-0.015655	0.135524	0.619879
GO:0009126	purine nucleoside monophosphate metabolic process	0.0899476	5.65186e-07	2.3504e-05	0.137391	0.023156	0.237333
GO:0009167	purine ribonucleoside monophosphate metabolic process	0.0899476	5.65186e-07	2.3504e-05	0.137391	0.023156	0.237333
GO:0042770	signal transduction in response to DNA damage	0.0648034	6.58765e-07	2.67799e-05	-0.0115507	0.0137784	0.165616
GO:0042776	mitochondrial ATP synthesis coupled proton transport	-0.00204392	8.82674e-07	3.50936e-05	-0.0984669	0.0982862	0.527596
GO:0072331	signal transduction by p53 class mediator	0.0675322	8.96923e-07	3.52725e-05	0.0162559	0.00823195	0.124097
GO:0002478	antigen processing and presentation of exogenous peptide antigen	0.078203	1.48464e-06	5.65413e-05	0.191088	0.194398	0.708391
GO:0007339	binding of sperm to zona pellucida	0.00150066	1.63486e-06	6.09787e-05	-0.337329	0.0287472	0.267371
GO:0071158	positive regulation of cell cycle arrest	0.0582923	1.91001e-06	7.05144e-05	0.0208109	0.0209355	0.222125
GO:0031396	regulation of protein ubiquitination	0.0813679	2.38713e-06	8.63663e-05	0.0497038	0.0032921	0.0753848
GO:0006261	DNA-dependent DNA replication	0.0800628	2.53767e-06	8.91388e-05	-0.0877035	0.000470853	0.0200417
Significant GO terms only in GO expression decrease analysis.
GOBP ID	Name	Average Spearman’s correlation	P value	FDR	Average log2(fold change, IPCs/vRG)	P value	FDR
GO:0044711	single-organism biosynthetic process	0.107604	0.00301946	0.0430601	0.0599992	6.27629e-08	7.56921e-05
GO:0007067	mitotic nuclear division	0.0969861	4.82431e-05	0.00130256	-0.0318629	7.96669e-07	0.000411764
GO:0007346	regulation of mitotic cell cycle	0.0924914	4.0543e-06	0.000137088	-0.0509928	1.19873e-06	0.000542128
GO:0051301	cell division	0.106106	0.00375468	0.0499956	0.0615275	7.64473e-06	0.00212759
GO:0010564	regulation of cell cycle process	0.0952929	1.108e-05	0.000351643	-0.00600757	1.28915e-05	0.0029197
GO:0016054	organic acid catabolic process	0.103133	0.0124981	0.121554	-0.210165	1.37189e-05	0.0029197
GO:0046395	carboxylic acid catabolic process	0.103133	0.0124981	0.121554	-0.210165	1.37189e-05	0.0029197
GO:0033013	tetrapyrrole metabolic process	0.105747	0.125489	0.56611	-0.400024	1.79211e-05	0.00309562
GO:0006778	porphyrin-containing compound metabolic process	0.100999	0.101085	0.495563	-0.584712	1.9047e-05	0.00313236
GO:0019752	carboxylic acid metabolic process	0.10503	0.00125085	0.0224565	0.0676929	2.24282e-05	0.00326205
GO:0032200	telomere organization	0.0766937	0.000166054	0.0039012	-0.365878	2.51604e-05	0.00326205
GO:0051186	cofactor metabolic process	0.100696	0.001819	0.0295875	-0.036977	2.60901e-05	0.00326205
GO:0000723	telomere maintenance	0.0764601	0.000192543	0.00443707	-0.368066	2.9297e-05	0.00350607
GO:0042168	heme metabolic process	0.0962541	0.0592397	0.353542	-0.623525	3.72823e-05	0.0040875
GO:0060271	cilium morphogenesis	0.102467	0.00820561	0.089422	-0.188849	4.5562e-05	0.00457898
GO:0034614	cellular response to reactive oxygen species	0.0920816	0.019861	0.168697	-0.275317	5.25868e-05	0.00514214
GO:0044782	cilium organization	0.100869	0.00820567	0.089422	-0.242735	5.85355e-05	0.00557319
GO:0006334	nucleosome assembly	0.0678058	1.36885e-05	0.000419705	-0.259986	6.37695e-05	0.00591584
GO:0006520	cellular amino acid metabolic process	0.103183	0.00931515	0.0985445	0.00369671	6.98279e-05	0.00631593
GO:0048145	regulation of fibroblast proliferation	0.0996557	0.244774	0.841	-0.493266	8.29313e-05	0.00678134
GO:0065004	protein-DNA complex assembly	0.0743946	8.61235e-06	0.000275748	-0.207393	8.34882e-05	0.00678134
GO:0006979	response to oxidative stress	0.0997393	0.00692712	0.0766431	-0.0481992	9.98989e-05	0.00757386
GO:0016052	carbohydrate catabolic process	0.0859839	0.00973741	0.102116	-0.230464	0.000100482	0.00757386
GO:0044282	small molecule catabolic process	0.104365	0.0103371	0.105948	-0.116962	0.000104873	0.00758858
GO:0009110	vitamin biosynthetic process	0.0915905	0.108087	0.517272	-0.902293	0.000109473	0.00772318
GO:0000302	response to reactive oxygen species	0.0923507	0.00762794	0.0841399	-0.171078	0.000111002	0.00772318
GO:0042440	pigment metabolic process	0.106375	0.144612	0.616704	-0.346093	0.000124738	0.00844699
GO:0007126	meiotic nuclear division	0.088236	8.67631e-05	0.0022263	-0.126778	0.000126074	0.00844699
GO:0006518	peptide metabolic process	0.0869741	0.00187025	0.0299523	-0.205521	0.000138382	0.00894046

## Sheet: Supplemental Table S4D
Supplemental Table S4D. GO negative correlation analysis of dnMis-Epi genes and GO expression decrease analysis during the vRG-to-IPC transition at GW10.
Column "GOBP ID": GO biological process ID.
Columns "Average Spearman’s correlation", "P value", "FDR": GO negative correlation analysis result.
Columns "Average log2(fold change, IPCs/vRG)", "P value", "FDR": GO expression decrease analysis result.
Significant GO terms in both GO negative correlation and expression decrease analyses.
GOBP ID	Name	Average Spearman’s correlation	P value	FDR	Average log2(fold change, IPCs/vRG)	P value	FDR
GO:0000278	mitotic cell cycle	0.0833312	2.0051e-13	8.06051e-11	0.0298127	1.28401e-08	4.64555e-05
GO:0006259	DNA metabolic process	0.0832814	5.00489e-13	1.50897e-10	0.0228392	1.09543e-07	7.92652e-05
GO:0055114	oxidation-reduction process	0.0853688	1.62593e-11	3.3566e-09	0.112078	0.000129462	0.00851624
GO:0007093	mitotic cell cycle checkpoint	0.0606458	1.66995e-11	3.3566e-09	-0.0765418	2.10179e-05	0.00326205
GO:1903047	mitotic cell cycle process	0.0841217	1.95738e-11	3.72726e-09	0.0414301	1.78403e-07	0.000107577
GO:0044774	mitotic DNA integrity checkpoint	0.0487291	1.86557e-10	2.81234e-08	-0.164793	7.9637e-05	0.00678134
GO:0010948	negative regulation of cell cycle process	0.0719503	1.1948e-09	1.27141e-07	-0.0271501	4.32758e-05	0.00447348
GO:1901991	negative regulation of mitotic cell cycle phase transition	0.067722	2.16924e-09	1.86864e-07	-0.0754703	1.52113e-05	0.00297585
GO:1901988	negative regulation of cell cycle phase transition	0.0681396	2.62683e-09	2.06877e-07	-0.0645756	2.54196e-05	0.00326205
GO:0000280	nuclear division	0.0838247	3.31982e-09	2.50231e-07	-0.0313814	4.88452e-08	7.56921e-05
GO:0048285	organelle fission	0.0847858	3.86941e-09	2.7999e-07	-0.0143925	9.94264e-08	7.92652e-05
GO:0006396	RNA processing	0.0893489	6.11808e-09	4.02459e-07	0.0594197	3.0041e-05	0.00350607
GO:0000075	cell cycle checkpoint	0.0731301	7.49341e-09	4.70199e-07	-0.00644322	8.4345e-05	0.00678134
GO:0006271	DNA strand elongation involved in DNA replication	0.03817	1.91844e-08	1.17643e-06	-0.408832	2.61469e-05	0.00326205
GO:0022616	DNA strand elongation	0.0397065	2.10103e-08	1.26692e-06	-0.445309	1.05108e-05	0.0027163
GO:0022402	cell cycle process	0.0911321	3.32048e-08	1.93766e-06	0.0998696	5.17357e-06	0.00155983
GO:1901987	regulation of cell cycle phase transition	0.0765174	5.90165e-08	3.38924e-06	-0.105705	2.12045e-06	0.00076718
GO:0006412	translation	0.0856898	7.49084e-08	4.23467e-06	-0.0198489	3.30557e-05	0.00373736
GO:0007067	mitotic nuclear division	0.0826481	8.45185e-08	4.564e-06	-0.0318629	7.96669e-07	0.000411764
GO:1901990	regulation of mitotic cell cycle phase transition	0.0766064	1.01812e-07	5.2622e-06	-0.108782	1.59289e-06	0.000640342
GO:0044770	cell cycle phase transition	0.0810556	1.11531e-07	5.60443e-06	0.0212935	9.88381e-05	0.00757386
GO:0044772	mitotic cell cycle phase transition	0.0811625	1.62764e-07	7.85176e-06	0.0215384	0.000104266	0.00758858
GO:0034660	ncRNA metabolic process	0.0863796	2.71469e-07	1.27555e-05	-0.0322417	4.67653e-06	0.00153815
GO:0006312	mitotic recombination	0.0491758	5.32289e-07	2.32027e-05	-0.550778	1.56277e-05	0.00297585
GO:0034470	ncRNA processing	0.0872144	8.00084e-07	3.28944e-05	-0.0648717	1.79679e-05	0.00309562
GO:0006260	DNA replication	0.0823516	1.32026e-06	5.13623e-05	-0.0655064	4.163e-05	0.00442992
GO:0006283	transcription-coupled nucleotide-excision repair	0.0493916	1.51377e-06	5.82639e-05	-0.379711	2.28743e-05	0.00326205
GO:0010564	regulation of cell cycle process	0.0861525	1.63139e-06	6.21302e-05	-0.00600757	1.28915e-05	0.0029197
GO:0007346	regulation of mitotic cell cycle	0.0843565	2.78068e-06	9.67357e-05	-0.0509928	1.19873e-06	0.000542128
Significant GO terms only in GO negative correlation analysis.
GOBP ID	Name	Average Spearman’s correlation	P value	FDR	Average log2(fold change, IPCs/vRG)	P value	FDR
GO:0022900	electron transport chain	0.0145932	8.78364e-27	3.17792e-23	-0.140059	0.000255098	0.0128187
GO:0022904	respiratory electron transport chain	0.0147648	2.43901e-26	4.41217e-23	-0.153582	0.000161502	0.0100426
GO:0045333	cellular respiration	0.0385981	1.73107e-21	2.08766e-18	-0.0574426	0.000301591	0.0147454
GO:0006119	oxidative phosphorylation	0.0218986	1.52187e-15	1.37653e-12	-0.157721	0.00150209	0.0440173
GO:0006120	mitochondrial electron transport, NADH to ubiquinone	-0.000631787	4.27603e-15	3.09414e-12	-0.221424	0.00209664	0.0553698
GO:0042773	ATP synthesis coupled electron transport	0.0149058	1.4478e-14	7.48305e-12	-0.116291	0.00637093	0.105744
GO:0042775	mitochondrial ATP synthesis coupled electron transport	0.0149058	1.4478e-14	7.48305e-12	-0.116291	0.00637093	0.105744
GO:0042590	antigen processing and presentation of exogenous peptide antigen via MHC class I	0.0290271	1.71482e-13	7.75529e-11	0.023968	0.0204482	0.217592
GO:0031145	anaphase-promoting complex-dependent proteasomal ubiquitin-dependent protein catabolic process	0.0332871	2.79365e-13	9.92885e-11	-0.141292	0.000322959	0.015121
GO:0051436	negative regulation of ubiquitin-protein ligase activity involved in mitotic cell cycle	0.0274301	3.01872e-13	9.92885e-11	-0.13977	0.000851865	0.0289277
GO:0002479	antigen processing and presentation of exogenous peptide antigen via MHC class I, TAP-dependent	0.0278561	7.32194e-13	2.03775e-10	-0.00169588	0.0136002	0.164421
GO:0051439	regulation of ubiquitin-protein ligase activity involved in mitotic cell cycle	0.0338349	1.21123e-12	3.13017e-10	-0.118154	0.000793865	0.0276173
GO:0051352	negative regulation of ligase activity	0.0325451	3.99273e-12	9.02856e-10	-0.133183	0.000791191	0.0276173
GO:0051444	negative regulation of ubiquitin-protein transferase activity	0.0325451	3.99273e-12	9.02856e-10	-0.133183	0.000791191	0.0276173
GO:0051437	positive regulation of ubiquitin-protein ligase activity involved in mitotic cell cycle	0.0355812	4.06114e-11	7.3466e-09	-0.099625	0.0021566	0.0561336
GO:0002474	antigen processing and presentation of peptide antigen via MHC class I	0.044741	7.48644e-11	1.28981e-08	0.0430595	0.0267176	0.258461
GO:0006091	generation of precursor metabolites and energy	0.0723665	1.02994e-10	1.69379e-08	0.209071	0.10001	0.533683
GO:0006521	regulation of cellular amino acid metabolic process	0.0259763	1.44023e-10	2.26555e-08	-0.0931332	0.0111973	0.145725
GO:0051351	positive regulation of ligase activity	0.0436768	2.74256e-10	3.96903e-08	-0.0521316	0.00437951	0.086585
GO:0051443	positive regulation of ubiquitin-protein transferase activity	0.0419369	4.1826e-10	5.82025e-08	-0.00481065	0.00653261	0.106946
GO:0051340	regulation of ligase activity	0.0489505	6.98268e-10	9.3568e-08	-0.0518794	0.0025121	0.0614346
GO:0000082	G1/S transition of mitotic cell cycle	0.0628791	7.60657e-10	9.37903e-08	-0.0218797	0.000508647	0.0208545
GO:0044843	cell cycle G1/S phase transition	0.0628791	7.60657e-10	9.37903e-08	-0.0218797	0.000508647	0.0208545
GO:0015992	proton transport	0.0495968	7.77697e-10	9.37903e-08	-0.0315941	0.0110151	0.144393
GO:0006281	DNA repair	0.0812988	8.26348e-10	9.64428e-08	0.0569818	0.000617903	0.0231244
GO:0006818	hydrogen transport	0.0508438	1.02734e-09	1.16153e-07	0.00316379	0.0179622	0.197529
GO:0051438	regulation of ubiquitin-protein transferase activity	0.047693	1.11485e-09	1.22228e-07	-0.0110738	0.00372543	0.0801805
GO:0072401	signal transduction involved in DNA integrity checkpoint	0.0382893	1.48527e-09	1.37787e-07	-0.0895834	0.00536231	0.0973776
GO:0072413	signal transduction involved in mitotic cell cycle checkpoint	0.0382893	1.48527e-09	1.37787e-07	-0.0895834	0.00536231	0.0973776
GO:0072422	signal transduction involved in DNA damage checkpoint	0.0382893	1.48527e-09	1.37787e-07	-0.0895834	0.00536231	0.0973776
GO:1902402	signal transduction involved in mitotic DNA damage checkpoint	0.0382893	1.48527e-09	1.37787e-07	-0.0895834	0.00536231	0.0973776
GO:1902403	signal transduction involved in mitotic DNA integrity checkpoint	0.0382893	1.48527e-09	1.37787e-07	-0.0895834	0.00536231	0.0973776
GO:0044773	mitotic DNA damage checkpoint	0.0489042	1.65219e-09	1.49441e-07	-0.15615	0.000169353	0.0100426
GO:0033238	regulation of cellular amine metabolic process	0.0391959	1.71646e-09	1.51467e-07	0.06459	0.0608678	0.402595
GO:0006310	DNA recombination	0.0728944	2.44762e-09	2.05941e-07	0.0126758	0.00308678	0.0724848
GO:0072431	signal transduction involved in mitotic G1 DNA damage checkpoint	0.0382021	2.63028e-09	2.06877e-07	-0.0653333	0.00883016	0.128289
GO:1902400	intracellular signal transduction involved in G1 DNA damage checkpoint	0.0382021	2.63028e-09	2.06877e-07	-0.0653333	0.00883016	0.128289
GO:0006977	DNA damage response, signal transduction by p53 class mediator resulting in cell cycle arrest	0.0373157	2.70499e-09	2.08227e-07	-0.0594398	0.0109265	0.144205
GO:0031398	positive regulation of protein ubiquitination	0.0586223	3.79909e-09	2.7999e-07	0.000181256	0.00233276	0.0594362
GO:0006974	cellular response to DNA damage stimulus	0.0858821	4.04202e-09	2.86746e-07	0.0975939	0.000513004	0.0208545
GO:1902600	hydrogen ion transmembrane transport	0.0457071	4.27046e-09	2.97126e-07	0.0197242	0.0363324	0.305699
GO:0072395	signal transduction involved in cell cycle checkpoint	0.0408153	5.57582e-09	3.80629e-07	-0.0642693	0.00869877	0.128131
GO:0015980	energy derivation by oxidation of organic compounds	0.0745735	5.86578e-09	3.93007e-07	0.220271	0.181958	0.700771
GO:0031571	mitotic G1 DNA damage checkpoint	0.0422901	7.53774e-09	4.70199e-07	-0.0772904	0.00633144	0.105744
GO:0044819	mitotic G1/S transition checkpoint	0.0422901	7.53774e-09	4.70199e-07	-0.0772904	0.00633144	0.105744
GO:0044783	G1 DNA damage checkpoint	0.0443992	2.31384e-08	1.37237e-06	-0.07779	0.00590852	0.103428
GO:0031397	negative regulation of protein ubiquitination	0.0584433	8.24257e-08	4.564e-06	-0.0154404	0.00308668	0.0724848
GO:0006457	protein folding	0.0765321	8.43016e-08	4.564e-06	0.0010064	0.00102041	0.03302
GO:0030330	DNA damage response, signal transduction by p53 class mediator	0.0523982	8.82194e-08	4.69379e-06	-0.0445993	0.007535	0.117003
GO:0009123	nucleoside monophosphate metabolic process	0.082953	1.0083e-07	5.2622e-06	0.118592	0.00955472	0.130043
GO:0008380	RNA splicing	0.0808352	1.06458e-07	5.42484e-06	0.0339723	0.000587243	0.0226026
GO:0046034	ATP metabolic process	0.0821886	1.21708e-07	5.97919e-06	0.137912	0.0328451	0.289838
GO:0031570	DNA integrity checkpoint	0.0686173	1.22294e-07	5.97919e-06	-0.0302743	0.000741845	0.02684
GO:0007005	mitochondrion organization	0.0823234	1.75315e-07	8.34593e-06	-0.00967761	0.000325991	0.015121
GO:0009161	ribonucleoside monophosphate metabolic process	0.0842781	3.09143e-07	1.43395e-05	0.12264	0.0151142	0.177543
GO:0042770	signal transduction in response to DNA damage	0.0592649	3.25806e-07	1.49211e-05	-0.0115507	0.0137784	0.165616
GO:0009126	purine nucleoside monophosphate metabolic process	0.0842609	4.6628e-07	2.08272e-05	0.137391	0.023156	0.237333
GO:0009167	purine ribonucleoside monophosphate metabolic process	0.0842609	4.6628e-07	2.08272e-05	0.137391	0.023156	0.237333
GO:0000077	DNA damage checkpoint	0.0687922	5.23177e-07	2.30836e-05	-0.00816931	0.00215435	0.0561336
GO:0072331	signal transduction by p53 class mediator	0.0626688	6.41299e-07	2.76217e-05	0.0162559	0.00823195	0.124097
GO:0000377	RNA splicing, via transesterification reactions with bulged adenosine as nucleophile	0.0748536	7.31602e-07	3.07783e-05	-0.00830694	0.000538067	0.0211601
GO:0000398	mRNA splicing, via spliceosome	0.0748536	7.31602e-07	3.07783e-05	-0.00830694	0.000538067	0.0211601
GO:0000375	RNA splicing, via transesterification reactions	0.075297	7.74405e-07	3.22046e-05	-0.00933294	0.000453422	0.0195296
GO:0007059	chromosome segregation	0.0753544	8.84204e-07	3.59444e-05	-0.00959194	0.00102218	0.03302
GO:0016071	mRNA metabolic process	0.0887213	9.74832e-07	3.91882e-05	0.0856707	0.000925202	0.0304307
GO:0006364	rRNA processing	0.079255	1.20071e-06	4.77381e-05	0.0276529	0.00403992	0.0825788
GO:0002478	antigen processing and presentation of exogenous peptide antigen	0.072762	1.25081e-06	4.91893e-05	0.191088	0.194398	0.708391
GO:0042776	mitochondrial ATP synthesis coupled proton transport	0.00454445	2.07736e-06	7.82907e-05	-0.0984669	0.0982862	0.527596
GO:0015985	energy coupled proton transport, down electrochemical gradient	0.0140891	2.22811e-06	8.22581e-05	-0.015655	0.135524	0.619879
GO:0015986	ATP synthesis coupled proton transport	0.0140891	2.22811e-06	8.22581e-05	-0.015655	0.135524	0.619879
GO:0031396	regulation of protein ubiquitination	0.0744157	2.36836e-06	8.61188e-05	0.0497038	0.0032921	0.0753848
GO:0043161	proteasome-mediated ubiquitin-dependent protein catabolic process	0.0775102	2.38029e-06	8.61188e-05	0.0820852	0.0122591	0.154005
GO:0071158	positive regulation of cell cycle arrest	0.0553133	2.55352e-06	9.12303e-05	0.0208109	0.0209355	0.222125
GO:0034622	cellular macromolecular complex assembly	0.0866227	2.572e-06	9.12303e-05	0.0981482	0.00418948	0.0837433
GO:0010498	proteasomal protein catabolic process	0.077857	2.61004e-06	9.16807e-05	0.0998545	0.0190756	0.206634
GO:0019884	antigen processing and presentation of exogenous antigen	0.0744108	2.83795e-06	9.77875e-05	0.183071	0.174404	0.688859
Significant GO terms only in GO expression decrease analysis.
GOBP ID	Name	Average Spearman’s correlation	P value	FDR	Average log2(fold change, IPCs/vRG)	P value	FDR
GO:0044711	single-organism biosynthetic process	0.10007	0.00350479	0.0483983	0.0599992	6.27629e-08	7.56921e-05
GO:0051301	cell division	0.0933991	6.79521e-05	0.00174362	0.0615275	7.64473e-06	0.00212759
GO:0016054	organic acid catabolic process	0.0953519	0.013064	0.128648	-0.210165	1.37189e-05	0.0029197
GO:0046395	carboxylic acid catabolic process	0.0953519	0.013064	0.128648	-0.210165	1.37189e-05	0.0029197
GO:0033013	tetrapyrrole metabolic process	0.0885666	0.015329	0.136154	-0.400024	1.79211e-05	0.00309562
GO:0006778	porphyrin-containing compound metabolic process	0.0845942	0.0180805	0.152839	-0.584712	1.9047e-05	0.00313236
GO:0019752	carboxylic acid metabolic process	0.0969566	0.000794667	0.0149745	0.0676929	2.24282e-05	0.00326205
GO:0032200	telomere organization	0.0704307	0.000118572	0.00285997	-0.365878	2.51604e-05	0.00326205
GO:0051186	cofactor metabolic process	0.0926757	0.00159878	0.0253702	-0.036977	2.60901e-05	0.00326205
GO:0000723	telomere maintenance	0.0696992	0.000103961	0.00255872	-0.368066	2.9297e-05	0.00350607
GO:0042168	heme metabolic process	0.0817877	0.0141746	0.131835	-0.623525	3.72823e-05	0.0040875
GO:0060271	cilium morphogenesis	0.0964002	0.0194632	0.162253	-0.188849	4.5562e-05	0.00457898
GO:0034614	cellular response to reactive oxygen species	0.0836143	0.00858718	0.099051	-0.275317	5.25868e-05	0.00514214
GO:0044782	cilium organization	0.095265	0.0227675	0.181039	-0.242735	5.85355e-05	0.00557319
GO:0006334	nucleosome assembly	0.062071	5.87539e-06	0.000193247	-0.259986	6.37695e-05	0.00591584
GO:0006520	cellular amino acid metabolic process	0.0965575	0.01409	0.131611	0.00369671	6.98279e-05	0.00631593
GO:0048145	regulation of fibroblast proliferation	0.088029	0.149633	0.612411	-0.493266	8.29313e-05	0.00678134
GO:0065004	protein-DNA complex assembly	0.0687012	4.93431e-06	0.000165299	-0.207393	8.34882e-05	0.00678134
GO:0006289	nucleotide-excision repair	0.0712342	3.82101e-05	0.00103167	-0.188863	8.35363e-05	0.00678134
GO:0006979	response to oxidative stress	0.091452	0.00219529	0.033094	-0.0481992	9.98989e-05	0.00757386
GO:0016052	carbohydrate catabolic process	0.0794591	0.00877302	0.100446	-0.230464	0.000100482	0.00757386
GO:0044282	small molecule catabolic process	0.0973067	0.0140604	0.131611	-0.116962	0.000104873	0.00758858
GO:0009110	vitamin biosynthetic process	0.0837646	0.114185	0.516187	-0.902293	0.000109473	0.00772318
GO:0000302	response to reactive oxygen species	0.08406	0.00217133	0.0328697	-0.171078	0.000111002	0.00772318
GO:0042440	pigment metabolic process	0.093966	0.0524065	0.311697	-0.346093	0.000124738	0.00844699
GO:0007126	meiotic nuclear division	0.0779612	2.28538e-05	0.000645976	-0.126778	0.000126074	0.00844699
GO:0006518	peptide metabolic process	0.0793075	0.00134387	0.0219015	-0.205521	0.000138382	0.00894046
