# Supplementary material for: Coexpression enrichment analysis at the single-cell level reveals convergent defects in neural progenitor cells and their cell-type transitions in neurodevelopmental disorders
Source: HighWire-hosted journal article supplement (doi:10.1101/gr.254987.119), 2020-06-01
Supplement: Supplemental_Table_S5.xlsx [file Supplemental_Table_S5.xlsx]

## Sheet: Supplemental Table S5
Supplemental Table S5. GO enrichment and correlation analyses of dnLoF-ASD and dnMis-Epi genes during the cell-type transition.
(A,B) GO enrichment and positive correlation analyses of dnLoF-ASD (A) and dnMis-Epi genes (B) during the vRG-to-IPC transition at GW10.
(C,D) GO enrichment and negative correlation analyses of dnLoF-ASD (C) and dnMis-Epi genes (D) during the vRG-to-IPC transition at GW10.

## Sheet: Supplemental Table S5A
Supplemental Table S5A. GO enrichment and positive correlation analyses of dnLoF-ASD genes during the vRG-to-IPC transition at GW10.
Column "GOBP ID": GO biological process ID.
Columns "Odds ratio", "P value", "FDR": GO enrichment analysis result.
Columns "Average Spearman’s correlation", "P value", "FDR": GO positive correlation analysis result.
Significant GO terms in both GO enrichment and positive correlation analyses.
GOBP ID	Name	Odds ratio	P value	FDR	Average Spearman’s correlation	P value	FDR
GO:0016570	histone modification	22.4835	3.07448e-08	2.44403e-05	0.138897	1.61168e-06	7.38106e-05
GO:0016569	covalent chromatin modification	22.1891	3.3776e-08	2.44403e-05	0.1394	7.59455e-07	3.9253e-05
Significant GO terms only in GO enrichment analysis.
GOBP ID	Name	Odds ratio	P value	FDR	Average Spearman’s correlation	P value	FDR
GO:0016568	chromatin modification	19.7153	3.82761e-09	1.38483e-05	0.131491	2.34096e-05	0.000711731
GO:0006325	chromatin organization	16.8375	1.5901e-08	1.95765e-05	0.124228	0.00288554	0.0230971
GO:0051276	chromosome organization	14.8066	1.62326e-08	1.95765e-05	0.114862	0.436559	0.800949
GO:0016571	histone methylation	47.0646	2.57464e-07	0.000155251	0.144878	0.00186231	0.0167192
GO:0006479	protein methylation	35.3682	9.7478e-07	0.000440844	0.134874	0.0141269	0.0784678
GO:0008213	protein alkylation	35.3682	9.7478e-07	0.000440844	0.134874	0.0141269	0.0784678
GO:0034968	histone lysine methylation	44.5428	4.72305e-06	0.00189866	0.149488	0.0014004	0.0134038
GO:0043414	macromolecule methylation	21.1342	1.07951e-05	0.00390566	0.12842	0.0547639	0.211466
Significant GO terms only in GO positive correlation analysis.
GOBP ID	Name	Odds ratio	P value	FDR	Average Spearman’s correlation	P value	FDR
GO:0048699	generation of neurons	3.38885	0.0262576	0.835911	0.141143	1.45029e-18	5.24715e-15
GO:0022008	neurogenesis	3.18843	0.0325084	0.835911	0.140287	3.11261e-18	5.63072e-15
GO:0030182	neuron differentiation	3.49441	0.0386445	0.879345	0.14286	6.22718e-17	7.50998e-14
GO:0048666	neuron development	4.1787	0.0224945	0.835911	0.144272	2.91087e-16	2.63288e-13
GO:0031175	neuron projection development	4.80662	0.0144631	0.79284	0.145799	6.69128e-16	4.84181e-13
GO:0048468	cell development	2.36223	0.113367	1	0.138114	9.16911e-16	5.52897e-13
GO:0061564	axon development	2.83931	0.170793	1	0.149581	3.19566e-15	1.6517e-12
GO:0048812	neuron projection morphogenesis	2.66937	0.187281	1	0.148294	5.62763e-15	2.5451e-12
GO:0048667	cell morphogenesis involved in neuron differentiation	2.75571	0.178611	1	0.148479	1.24927e-14	5.02208e-12
GO:0007409	axonogenesis	2.97409	0.159193	1	0.148985	1.93852e-14	7.01358e-12
GO:0000904	cell morphogenesis involved in differentiation	2.35224	0.224972	1	0.145492	8.09577e-14	2.66277e-11
GO:0051056	regulation of small GTPase mediated signal transduction	1.49326	0.498533	1	0.145349	1.29491e-12	3.90417e-10
GO:0046578	regulation of Ras protein signal transduction	1.76684	0.442874	1	0.147385	2.49391e-12	6.94076e-10
GO:0007268	synaptic transmission	2.98352	0.158425	1	0.146178	8.70064e-12	2.24849e-09
GO:0031344	regulation of cell projection organization	1.98159	0.406951	1	0.150431	9.74722e-12	2.35103e-09
GO:0045664	regulation of neuron differentiation	1.78066	0.440379	1	0.149173	1.26064e-11	2.85062e-09
GO:0051960	regulation of nervous system development	4.38134	0.0392692	0.88246	0.144484	2.83973e-11	6.04362e-09
GO:0007411	axon guidance	1.84562	0.429018	1	0.14782	6.07161e-11	1.15616e-08
GO:0097485	neuron projection guidance	1.84562	0.429018	1	0.14782	6.07161e-11	1.15616e-08
GO:0043087	regulation of GTPase activity	1.39176	0.522716	1	0.141768	7.88452e-11	1.32029e-08
GO:0050793	regulation of developmental process	1.51363	0.343438	1	0.133471	7.95781e-11	1.32029e-08
GO:0006468	protein phosphorylation	0	1	1	0.139926	8.02828e-11	1.32029e-08
GO:0030030	cell projection organization	3.40359	0.0417508	0.903762	0.137152	8.62999e-11	1.35754e-08
GO:0033124	regulation of GTP catabolic process	1.38746	0.523789	1	0.141321	1.43125e-10	2.1322e-08
GO:0045595	regulation of cell differentiation	1.33468	0.458613	1	0.135741	1.47333e-10	2.1322e-08
GO:0010975	regulation of neuron projection development	2.48507	0.341609	1	0.151933	2.13099e-10	2.96535e-08
GO:0032318	regulation of Ras GTPase activity	2.14878	0.382697	1	0.147747	2.28976e-10	3.06828e-08
GO:0050767	regulation of neurogenesis	3.06108	0.152314	1	0.144069	3.09974e-10	4.0053e-08
GO:0048598	embryonic morphogenesis	1.78763	0.439128	1	0.144683	1.21051e-09	1.51022e-07
GO:1900542	regulation of purine nucleotide metabolic process	1.12226	0.59886	1	0.137828	1.47841e-09	1.78296e-07
GO:0048858	cell projection morphogenesis	2.0443	0.273151	1	0.13859	2.88979e-09	3.37266e-07
GO:2000026	regulation of multicellular organismal development	2.14952	0.186455	1	0.134391	3.09378e-09	3.43045e-07
GO:0007267	cell-cell signaling	4.9481	0.0131823	0.757043	0.138774	3.12894e-09	3.43045e-07
GO:0022610	biological adhesion	0	1	1	0.140389	3.25605e-09	3.46482e-07
GO:0040011	locomotion	0.776355	0.729797	1	0.134386	3.355e-09	3.46811e-07
GO:0060284	regulation of cell development	2.5044	0.205612	1	0.139968	3.84012e-09	3.85932e-07
GO:0006140	regulation of nucleotide metabolic process	1.1166	0.600673	1	0.136992	3.98781e-09	3.89943e-07
GO:1902531	regulation of intracellular signal transduction	0.511045	0.859121	1	0.130959	4.09635e-09	3.90015e-07
GO:0007155	cell adhesion	0	1	1	0.140247	4.44611e-09	4.12462e-07
GO:0009887	organ morphogenesis	1.32207	0.540634	1	0.139828	5.25325e-09	4.75157e-07
GO:0030811	regulation of nucleotide catabolic process	1.28047	0.551882	1	0.13719	1.09416e-08	9.4505e-07
GO:0000902	cell morphogenesis	1.69995	0.346657	1	0.136246	1.09707e-08	9.4505e-07
GO:0033121	regulation of purine nucleotide catabolic process	1.28414	0.550871	1	0.137028	1.49904e-08	1.26128e-06
GO:0007167	enzyme linked receptor protein signaling pathway	0.89554	0.679786	1	0.133851	1.74743e-08	1.43686e-06
GO:0050804	regulation of synaptic transmission	13.0415	0.00226265	0.208441	0.155269	2.22906e-08	1.79216e-06
GO:0043547	positive regulation of GTPase activity	2.29917	0.363178	1	0.144716	2.53151e-08	1.99109e-06
GO:0018107	peptidyl-threonine phosphorylation	0	1	1	0.190425	2.86285e-08	2.20378e-06
GO:0032990	cell part morphogenesis	1.97801	0.285453	1	0.136598	3.11047e-08	2.34451e-06
GO:0009118	regulation of nucleoside metabolic process	1.28047	0.551882	1	0.136537	3.44341e-08	2.5425e-06
GO:0003008	system process	4.14412	0.0230813	0.835911	0.134251	5.11155e-08	3.69872e-06
GO:0018210	peptidyl-threonine modification	0	1	1	0.185476	6.51075e-08	4.6188e-06
GO:0032879	regulation of localization	2.08526	0.153874	1	0.129108	1.00028e-07	6.90024e-06
GO:0006935	chemotaxis	1.43618	0.511866	1	0.138114	1.02989e-07	6.90024e-06
GO:0042330	taxis	1.43618	0.511866	1	0.138114	1.02989e-07	6.90024e-06
GO:0050877	neurological system process	4.57174	0.0354254	0.860196	0.1391	1.21139e-07	7.96875e-06
GO:0070848	response to growth factor	0	1	1	0.134727	1.46279e-07	9.45066e-06
GO:0031346	positive regulation of cell projection organization	0	1	1	0.149929	1.61736e-07	1.0266e-05
GO:0048729	tissue morphogenesis	1.94785	0.412216	1	0.140186	1.7061e-07	1.05096e-05
GO:0008038	neuron recognition	0	1	1	0.195146	1.71383e-07	1.05096e-05
GO:0071363	cellular response to growth factor stimulus	0	1	1	0.134786	1.76186e-07	1.0624e-05
GO:0009894	regulation of catabolic process	1.56357	0.383562	1	0.130806	1.98162e-07	1.17063e-05
GO:0048167	regulation of synaptic plasticity	15.0352	0.00949159	0.635937	0.164538	2.00606e-07	1.17063e-05
GO:0032989	cellular component morphogenesis	1.58297	0.377991	1	0.133709	2.12613e-07	1.22101e-05
GO:0016055	Wnt signaling pathway	3.22952	0.275829	1	0.14927	2.64385e-07	1.4946e-05
GO:0002009	morphogenesis of an epithelium	0	1	1	0.14145	3.44183e-07	1.91577e-05
GO:0048704	embryonic skeletal system morphogenesis	0	1	1	0.188755	3.68739e-07	2.02136e-05
GO:0007417	central nervous system development	0.875677	0.687744	1	0.131983	4.73761e-07	2.55831e-05
GO:0007169	transmembrane receptor protein tyrosine kinase signaling pathway	1.16652	0.585005	1	0.133773	5.4291e-07	2.8886e-05
GO:0010769	regulation of cell morphogenesis involved in differentiation	2.96197	0.296352	1	0.147229	5.52726e-07	2.89821e-05
GO:0006928	cellular component movement	0.6176	0.804692	1	0.13037	7.88184e-07	4.01641e-05
GO:0048705	skeletal system morphogenesis	6.16087	0.156928	1	0.157927	8.40759e-07	4.22481e-05
GO:0022603	regulation of anatomical structure morphogenesis	1.16652	0.585005	1	0.135404	8.90784e-07	4.41487e-05
GO:0051049	regulation of transport	2.95843	0.0623	1	0.130225	9.0942e-07	4.44632e-05
GO:0031329	regulation of cellular catabolic process	1.70963	0.344229	1	0.130025	9.36276e-07	4.51659e-05
GO:0071495	cellular response to endogenous stimulus	0	1	1	0.131305	9.77304e-07	4.62129e-05
GO:0009790	embryo development	5.14196	0.00543391	0.409581	0.13262	9.83525e-07	4.62129e-05
GO:0022604	regulation of cell morphogenesis	1.86065	0.426463	1	0.139994	1.09328e-06	5.07113e-05
GO:0009952	anterior/posterior pattern specification	5.09421	0.18606	1	0.153388	1.8508e-06	8.37025e-05
GO:0038179	neurotrophin signaling pathway	0	1	1	0.139417	1.88162e-06	8.40455e-05
GO:0007173	epidermal growth factor receptor signaling pathway	0	1	1	0.145352	1.98206e-06	8.63988e-05
GO:0038127	ERBB signaling pathway	0	1	1	0.145352	1.98206e-06	8.63988e-05
GO:0016337	single organismal cell-cell adhesion	0	1	1	0.151734	2.07222e-06	8.92536e-05
GO:0007610	behavior	3.767	0.109804	1	0.138242	2.20195e-06	9.37252e-05
GO:0016358	dendrite development	18.0536	0.00674753	0.498215	0.167492	2.26422e-06	9.52551e-05

## Sheet: Supplemental Table S5B
Supplemental Table S5B. GO enrichment and positive correlation analyses of dnMis-Epi genes during the vRG-to-IPC transition at GW10.
Column "GOBP ID": GO biological process ID.
Columns "Odds ratio", "P value", "FDR": GO enrichment analysis result.
Columns "Average Spearman’s correlation", "P value", "FDR": GO positive correlation analysis result.
Significant GO terms in both GO enrichment and positive correlation analyses.
GOBP ID	Name	Odds ratio	P value	FDR	Average Spearman’s correlation	P value	FDR
GO:0048666	neuron development	11.8703	8.95232e-07	0.000818954	0.132692	3.09155e-15	2.79631e-12
GO:0030182	neuron differentiation	9.9121	3.64226e-06	0.00144903	0.131689	3.60395e-16	4.34637e-13
GO:0031175	neuron projection development	11.4127	3.79435e-06	0.00144903	0.133474	3.37382e-14	2.03441e-11
GO:0048699	generation of neurons	8.64123	4.45984e-06	0.00144903	0.129612	1.89519e-17	6.8568e-14
GO:0007268	synaptic transmission	12.9592	5.77081e-06	0.00145731	0.134742	2.46145e-11	6.8504e-09
GO:0050877	neurological system process	12.5943	6.89977e-06	0.00145731	0.126896	4.89185e-07	3.4036e-05
GO:0022008	neurogenesis	8.12713	7.38029e-06	0.00145731	0.128913	4.91394e-17	8.88932e-14
GO:0048468	cell development	7.93108	9.00537e-06	0.00153103	0.12702	5.76002e-15	4.16795e-12
GO:0003008	system process	9.82822	1.07382e-05	0.00161878	0.123205	1.78966e-07	1.34895e-05
GO:0007267	cell-cell signaling	9.68729	3.47949e-05	0.00503552	0.127953	5.3516e-09	5.8673e-07
GO:0030030	cell projection organization	8.06285	4.12594e-05	0.0057414	0.125971	9.23239e-10	1.23714e-07
Significant GO terms only in GO enrichment analysis.
GOBP ID	Name	Odds ratio	P value	FDR	Average Spearman’s correlation	P value	FDR
GO:0051899	membrane depolarization	63.3996	6.30774e-08	0.000228214	0.151946	1.32338e-05	0.000493605
GO:0019226	transmission of nerve impulse	103.672	2.12517e-07	0.000384443	0.154155	0.000519641	0.00767053
GO:0043524	negative regulation of neuron apoptotic process	34.8991	1.01423e-06	0.000818954	0.120235	0.0204024	0.110338
GO:0035637	multicellular organismal signaling	62.9882	1.29492e-06	0.000818954	0.142741	0.00158416	0.0174008
GO:1901215	negative regulation of neuron death	32.7887	1.35813e-06	0.000818954	0.120988	0.0158922	0.0908343
GO:0086010	membrane depolarization during action potential	164.628	2.24063e-06	0.00115809	0.180496	0.000896714	0.0116283
GO:0007626	locomotory behavior	25.3849	4.48425e-06	0.00144903	0.120919	0.0143303	0.0844413
GO:0043269	regulation of ion transport	17.2862	4.80608e-06	0.00144903	0.12432	0.00051876	0.00767053
GO:0042391	regulation of membrane potential	23.6192	6.2933e-06	0.00145731	0.127178	0.00137868	0.0156865
GO:0043523	regulation of neuron apoptotic process	23.4112	6.55459e-06	0.00145731	0.120513	0.00996525	0.0642883
GO:0050905	neuromuscular process	39.1783	7.51178e-06	0.00145731	0.130892	0.00418365	0.0355316
GO:0034765	regulation of ion transmembrane transport	22.4365	7.99151e-06	0.00145731	0.127291	0.000997493	0.0127075
GO:0008344	adult locomotory behavior	38.4722	8.0559e-06	0.00145731	0.111737	0.257674	0.617849
GO:0034762	regulation of transmembrane transport	21.6949	9.30973e-06	0.00153103	0.125263	0.00189108	0.0196044
GO:1901214	regulation of neuron death	21.1856	1.04056e-05	0.00161878	0.119654	0.0121456	0.0738464
GO:0030534	adult behavior	24.3924	4.42163e-05	0.00592498	0.119769	0.0331738	0.156076
GO:0034220	ion transmembrane transport	11.2438	4.95589e-05	0.00640372	0.107084	0.351036	0.747958
GO:0021700	developmental maturation	20.9143	7.83718e-05	0.00977755	0.134724	3.03602e-05	0.000967648
GO:0001508	action potential	42.5779	8.26354e-05	0.00996583	0.135042	0.00536996	0.0421442
Significant GO terms only in GO positive correlation analysis.
GOBP ID	Name	Odds ratio	P value	FDR	Average Spearman’s correlation	P value	FDR
GO:0061564	axon development	7.87734	0.000902866	0.0544428	0.137233	5.44219e-14	2.81284e-11
GO:0048812	neuron projection morphogenesis	9.3747	0.00012971	0.0142209	0.136109	6.63191e-14	2.99928e-11
GO:0048667	cell morphogenesis involved in neuron differentiation	9.68163	0.000109556	0.0123867	0.136319	1.65858e-13	6.6675e-11
GO:0007409	axonogenesis	8.25393	0.000737745	0.0485302	0.136598	4.49197e-13	1.62519e-10
GO:0000904	cell morphogenesis involved in differentiation	8.25167	0.000251612	0.0225935	0.133379	1.54195e-12	5.07163e-10
GO:0046578	regulation of Ras protein signal transduction	1.69307	0.456304	1	0.135571	2.09417e-11	6.31392e-09
GO:0051056	regulation of small GTPase mediated signal transduction	1.43092	0.512766	1	0.133105	3.22796e-11	8.34198e-09
GO:0051960	regulation of nervous system development	5.85943	0.0074673	0.203133	0.132719	5.73712e-11	1.38117e-08
GO:0043087	regulation of GTPase activity	2.79159	0.174685	1	0.131588	6.10798e-11	1.38117e-08
GO:0033124	regulation of GTP catabolic process	2.78295	0.1755	1	0.131257	1.04473e-10	2.22343e-08
GO:0045664	regulation of neuron differentiation	5.62676	0.0209886	0.367873	0.136584	1.11118e-10	2.23348e-08
GO:0032318	regulation of Ras GTPase activity	2.05893	0.394995	1	0.137289	1.7675e-10	3.36569e-08
GO:0007411	axon guidance	8.18024	0.00238321	0.0888914	0.135898	3.28951e-10	5.66735e-08
GO:0097485	neuron projection guidance	8.18024	0.00238321	0.0888914	0.135898	3.28951e-10	5.66735e-08
GO:0031344	regulation of cell projection organization	3.97942	0.100096	0.721409	0.137259	4.19138e-10	6.89292e-08
GO:0050767	regulation of neurogenesis	4.60546	0.0345368	0.436605	0.132431	4.44215e-10	6.9877e-08
GO:0048598	embryonic morphogenesis	1.71301	0.452495	1	0.134002	7.52914e-10	1.13404e-07
GO:1900542	regulation of purine nucleotide metabolic process	3.53668	0.0646088	0.593286	0.128009	7.93098e-10	1.13404e-07
GO:0045595	regulation of cell differentiation	2.80448	0.0714896	0.610022	0.124404	8.14956e-10	1.13404e-07
GO:0010975	regulation of neuron projection development	4.99544	0.0685026	0.603401	0.139706	1.40501e-09	1.81547e-07
GO:0006140	regulation of nucleotide metabolic process	3.51876	0.0653658	0.594001	0.127305	2.03829e-09	2.54294e-07
GO:0006468	protein phosphorylation	0.989866	0.643675	1	0.127372	2.89106e-09	3.45082e-07
GO:0050793	regulation of developmental process	2.65451	0.0590794	0.565475	0.121912	2.95676e-09	3.45082e-07
GO:0009887	organ morphogenesis	1.26687	0.555301	1	0.129313	3.32112e-09	3.75494e-07
GO:0040011	locomotion	3.41869	0.040755	0.465147	0.123973	5.53684e-09	5.89185e-07
GO:0048858	cell projection morphogenesis	7.16198	0.000517113	0.0366846	0.127761	6.36782e-09	6.58251e-07
GO:0060284	regulation of cell development	3.76658	0.0558575	0.54326	0.128646	7.29737e-09	7.33386e-07
GO:0043547	positive regulation of GTPase activity	4.62029	0.0781638	0.637989	0.134872	9.02504e-09	8.82503e-07
GO:0030811	regulation of nucleotide catabolic process	2.56782	0.197725	1	0.127433	9.27113e-09	8.82709e-07
GO:0022610	biological adhesion	1.16995	0.583616	1	0.129032	1.02973e-08	9.55273e-07
GO:0033121	regulation of purine nucleotide catabolic process	2.57518	0.196895	1	0.127362	1.11638e-08	1.00977e-06
GO:0007155	cell adhesion	1.17317	0.582635	1	0.128981	1.20775e-08	1.06577e-06
GO:0009118	regulation of nucleoside metabolic process	2.56782	0.197725	1	0.126967	2.20962e-08	1.90343e-06
GO:2000026	regulation of multicellular organismal development	2.87007	0.0670852	0.602269	0.123167	2.48868e-08	2.09396e-06
GO:1902531	regulation of intracellular signal transduction	1.02318	0.593691	1	0.120166	5.48236e-08	4.508e-06
GO:0000902	cell morphogenesis	5.94767	0.00129768	0.0693902	0.124976	6.27687e-08	5.0466e-06
GO:0032990	cell part morphogenesis	6.92813	0.000610983	0.0409359	0.125885	7.75891e-08	6.10255e-06
GO:0050804	regulation of synaptic transmission	17.5312	0.000151239	0.0160936	0.140979	1.77728e-07	1.34895e-05
GO:0002009	morphogenesis of an epithelium	2.28294	0.364848	1	0.131019	3.1508e-07	2.32645e-05
GO:0007167	enzyme linked receptor protein signaling pathway	0.858146	0.694642	1	0.122473	4.43413e-07	3.20854e-05
GO:0009952	anterior/posterior pattern specification	0	1	1	0.144084	4.71562e-07	3.34532e-05
GO:0006935	chemotaxis	6.34971	0.00569826	0.176365	0.127049	5.38716e-07	3.6094e-05
GO:0042330	taxis	6.34971	0.00569826	0.176365	0.127049	5.38716e-07	3.6094e-05
GO:0018107	peptidyl-threonine phosphorylation	14.7164	0.0702134	0.603401	0.165241	6.29321e-07	4.10327e-05
GO:0048729	tissue morphogenesis	1.86657	0.425102	1	0.128705	6.35111e-07	4.10327e-05
GO:0008038	neuron recognition	17.5493	0.0595635	0.567107	0.177311	6.66287e-07	4.22917e-05
GO:0016055	Wnt signaling pathway	0	1	1	0.136468	6.88579e-07	4.29531e-05
GO:0006928	cellular component movement	3.57125	0.0213875	0.367873	0.120456	7.41068e-07	4.54438e-05
GO:0009790	embryo development	1.68956	0.348599	1	0.122623	8.38511e-07	5.05622e-05
GO:0032989	cellular component morphogenesis	5.53594	0.00183502	0.0809645	0.122779	9.10449e-07	5.37122e-05
GO:0010769	regulation of cell morphogenesis involved in differentiation	5.96003	0.0505591	0.518125	0.135583	9.24745e-07	5.37122e-05
GO:0016569	covalent chromatin modification	8.31612	0.00224947	0.0875115	0.127772	9.35288e-07	5.37122e-05
GO:0032879	regulation of localization	4.92761	0.000947611	0.0562042	0.118161	9.93959e-07	5.61898e-05
GO:0048167	regulation of synaptic plasticity	22.8794	0.000469354	0.0346556	0.150274	1.01081e-06	5.62633e-05
GO:0018210	peptidyl-threonine modification	13.4197	0.0765476	0.634706	0.161954	1.073e-06	5.88197e-05
GO:0009894	regulation of catabolic process	2.34922	0.155972	0.937388	0.120082	1.75886e-06	9.49783e-05

## Sheet: Supplemental Table S5C
Supplemental Table S5C. GO enrichment and negative correlation analyses of dnLoF-ASD genes during the vRG-to-IPC transition at GW10.
Column "GOBP ID": GO biological process ID.
Columns "Odds ratio", "P value", "FDR": GO enrichment analysis result.
Columns "Average Spearman’s correlation", "P value", "FDR": GO negative correlation analysis result.
No significant GO terms in both GO enrichment and negative correlation analyses.
Significant GO terms only in GO enrichment analysis.
GOBP ID	Name	Odds ratio	P value	FDR	Average Spearman’s correlation	P value	FDR
GO:0016568	chromatin modification	19.7153	3.82761e-09	1.38483e-05	0.131491	0.999977	1
GO:0006325	chromatin organization	16.8375	1.5901e-08	1.95765e-05	0.124228	0.997115	1
GO:0051276	chromosome organization	14.8066	1.62326e-08	1.95765e-05	0.114862	0.563445	1
GO:0016570	histone modification	22.4835	3.07448e-08	2.44403e-05	0.138897	0.999998	1
GO:0016569	covalent chromatin modification	22.1891	3.3776e-08	2.44403e-05	0.1394	0.999999	1
GO:0016571	histone methylation	47.0646	2.57464e-07	0.000155251	0.144878	0.998138	1
GO:0006479	protein methylation	35.3682	9.7478e-07	0.000440844	0.134874	0.985874	1
GO:0008213	protein alkylation	35.3682	9.7478e-07	0.000440844	0.134874	0.985874	1
GO:0034968	histone lysine methylation	44.5428	4.72305e-06	0.00189866	0.149488	0.9986	1
GO:0043414	macromolecule methylation	21.1342	1.07951e-05	0.00390566	0.12842	0.945239	1
Significant GO terms only in GO negative correlation analysis.
GOBP ID	Name	Odds ratio	P value	FDR	Average Spearman’s correlation	P value	FDR
GO:0022900	electron transport chain	5.09421	0.18606	1	0.0103523	8.33776e-28	2.0753e-24
GO:0022904	respiratory electron transport chain	5.14983	0.184268	1	0.0097124	1.14721e-27	2.0753e-24
GO:0045333	cellular respiration	3.54916	0.254732	1	0.037039	4.43099e-23	5.34377e-20
GO:0006119	oxidative phosphorylation	8.33634	0.119105	1	0.0149551	1.00642e-16	9.10307e-14
GO:0006120	mitochondrial electron transport, NADH to ubiquinone	0	1	1	-0.00995053	6.71627e-16	4.8599e-13
GO:0042773	ATP synthesis coupled electron transport	10.1162	0.099589	1	0.00706842	1.56104e-15	8.06837e-13
GO:0042775	mitochondrial ATP synthesis coupled electron transport	10.1162	0.099589	1	0.00706842	1.56104e-15	8.06837e-13
GO:0051436	negative regulation of ubiquitin-protein ligase activity involved in mitotic cell cycle	0	1	1	0.0304858	2.248e-13	1.01666e-10
GO:0042590	antigen processing and presentation of exogenous peptide antigen via MHC class I	0	1	1	0.0304155	2.87692e-13	1.15652e-10
GO:0002479	antigen processing and presentation of exogenous peptide antigen via MHC class I, TAP-dependent	0	1	1	0.0295833	1.65514e-12	5.98829e-10
GO:0051352	negative regulation of ligase activity	0	1	1	0.0354872	2.03595e-12	6.13838e-10
GO:0051444	negative regulation of ubiquitin-protein transferase activity	0	1	1	0.0354872	2.03595e-12	6.13838e-10
GO:0031145	anaphase-promoting complex-dependent proteasomal ubiquitin-dependent protein catabolic process	0	1	1	0.0400014	3.6454e-12	1.01454e-09
GO:0051439	regulation of ubiquitin-protein ligase activity involved in mitotic cell cycle	0	1	1	0.0397695	7.74751e-12	1.998e-09
GO:0006259	DNA metabolic process	2.31837	0.160927	1	0.0916937	8.2836e-12	1.998e-09
GO:0015992	proton transport	0	1	1	0.0467922	1.67406e-11	3.78547e-09
GO:0055114	oxidation-reduction process	3.43938	0.0404913	0.903762	0.0915637	2.84087e-11	5.776e-09
GO:0006818	hydrogen transport	0	1	1	0.0485472	2.87363e-11	5.776e-09
GO:0044774	mitotic DNA integrity checkpoint	0	1	1	0.0496225	3.90639e-11	7.43859e-09
GO:0007093	mitotic cell cycle checkpoint	0	1	1	0.0659677	4.17571e-11	7.55387e-09
GO:0006091	generation of precursor metabolites and energy	3.5292	0.121894	1	0.0770228	5.22406e-11	9.0003e-09
GO:0000278	mitotic cell cycle	0.695258	0.766931	1	0.093267	6.31674e-11	1.03882e-08
GO:0006521	regulation of cellular amino acid metabolic process	0	1	1	0.0263371	7.3851e-11	1.16171e-08
GO:0051437	positive regulation of ubiquitin-protein ligase activity involved in mitotic cell cycle	0	1	1	0.0400601	7.96546e-11	1.20079e-08
GO:1902600	hydrogen ion transmembrane transport	0	1	1	0.0430457	2.14863e-10	3.1095e-08
GO:0044773	mitotic DNA damage checkpoint	0	1	1	0.0494226	2.61114e-10	3.51827e-08
GO:0006396	RNA processing	0	1	1	0.0944812	2.62558e-10	3.51827e-08
GO:0033238	regulation of cellular amine metabolic process	0	1	1	0.0393072	3.50008e-10	4.26173e-08
GO:0072401	signal transduction involved in DNA integrity checkpoint	0	1	1	0.037854	3.88715e-10	4.26173e-08
GO:0072413	signal transduction involved in mitotic cell cycle checkpoint	0	1	1	0.037854	3.88715e-10	4.26173e-08
GO:0072422	signal transduction involved in DNA damage checkpoint	0	1	1	0.037854	3.88715e-10	4.26173e-08
GO:1902402	signal transduction involved in mitotic DNA damage checkpoint	0	1	1	0.037854	3.88715e-10	4.26173e-08
GO:1902403	signal transduction involved in mitotic DNA integrity checkpoint	0	1	1	0.037854	3.88715e-10	4.26173e-08
GO:0051351	positive regulation of ligase activity	0	1	1	0.0485893	4.61719e-10	4.91324e-08
GO:0051443	positive regulation of ubiquitin-protein transferase activity	0	1	1	0.0462121	4.81889e-10	4.98135e-08
GO:0006412	translation	0	1	1	0.0887457	7.94569e-10	7.98541e-08
GO:0006977	DNA damage response, signal transduction by p53 class mediator resulting in cell cycle arrest	0	1	1	0.0374133	8.94555e-10	8.4575e-08
GO:0002474	antigen processing and presentation of peptide antigen via MHC class I	0	1	1	0.0502027	9.12539e-10	8.4575e-08
GO:0072431	signal transduction involved in mitotic G1 DNA damage checkpoint	0	1	1	0.0384893	9.35047e-10	8.4575e-08
GO:1902400	intracellular signal transduction involved in G1 DNA damage checkpoint	0	1	1	0.0384893	9.35047e-10	8.4575e-08
GO:0000082	G1/S transition of mitotic cell cycle	0	1	1	0.067659	1.51318e-09	1.30349e-07
GO:0044843	cell cycle G1/S phase transition	0	1	1	0.067659	1.51318e-09	1.30349e-07
GO:0072395	signal transduction involved in cell cycle checkpoint	0	1	1	0.0409751	1.75387e-09	1.4757e-07
GO:0031571	mitotic G1 DNA damage checkpoint	0	1	1	0.043345	2.37584e-09	1.91018e-07
GO:0044819	mitotic G1/S transition checkpoint	0	1	1	0.043345	2.37584e-09	1.91018e-07
GO:0015980	energy derivation by oxidation of organic compounds	4.17875	0.0926962	1	0.0791707	2.44298e-09	1.92146e-07
GO:1903047	mitotic cell cycle process	0.782019	0.727297	1	0.0940785	2.68754e-09	2.06883e-07
GO:0051340	regulation of ligase activity	0	1	1	0.0557402	2.79857e-09	2.0743e-07
GO:0034660	ncRNA metabolic process	0	1	1	0.0883901	2.80931e-09	2.0743e-07
GO:0006974	cellular response to DNA damage stimulus	0	1	1	0.0932322	3.00248e-09	2.1726e-07
GO:0022616	DNA strand elongation	0	1	1	0.0375869	3.11449e-09	2.20946e-07
GO:0051438	regulation of ubiquitin-protein transferase activity	0	1	1	0.0540197	3.21794e-09	2.23894e-07
GO:0006271	DNA strand elongation involved in DNA replication	0	1	1	0.0362362	3.62095e-09	2.47181e-07
GO:0010948	negative regulation of cell cycle process	0	1	1	0.079196	5.86947e-09	3.93255e-07
GO:1901991	negative regulation of mitotic cell cycle phase transition	0	1	1	0.0745885	6.21624e-09	4.08915e-07
GO:0044783	G1 DNA damage checkpoint	0	1	1	0.0454092	6.51332e-09	4.20807e-07
GO:1901988	negative regulation of cell cycle phase transition	0	1	1	0.0750266	7.62976e-09	4.84289e-07
GO:0006281	DNA repair	0	1	1	0.0898805	8.12265e-09	5.06685e-07
GO:0000075	cell cycle checkpoint	0	1	1	0.0798624	1.10094e-08	6.75117e-07
GO:0031398	positive regulation of protein ubiquitination	0	1	1	0.0658409	1.60382e-08	9.67106e-07
GO:0034470	ncRNA processing	0	1	1	0.0900957	1.98552e-08	1.17764e-06
GO:0031397	negative regulation of protein ubiquitination	4.93316	0.191414	1	0.0620417	2.48653e-08	1.45101e-06
GO:0031570	DNA integrity checkpoint	0	1	1	0.0724126	3.23354e-08	1.85697e-06
GO:0008380	RNA splicing	0	1	1	0.085722	4.62519e-08	2.61468e-06
GO:0009123	nucleoside monophosphate metabolic process	4.71706	0.032808	0.835911	0.0882552	5.0237e-08	2.79627e-06
GO:0016071	mRNA metabolic process	0	1	1	0.0937344	5.36215e-08	2.93943e-06
GO:0006364	rRNA processing	0	1	1	0.0823415	1.25346e-07	6.76867e-06
GO:1901987	regulation of cell cycle phase transition	0	1	1	0.0841044	1.2935e-07	6.88218e-06
GO:0030330	DNA damage response, signal transduction by p53 class mediator	0	1	1	0.0573253	1.76513e-07	9.25543e-06
GO:0007005	mitochondrion organization	0	1	1	0.0878	1.82473e-07	9.43125e-06
GO:0000077	DNA damage checkpoint	0	1	1	0.0728128	1.91887e-07	9.77814e-06
GO:0046034	ATP metabolic process	5.38463	0.0236283	0.835911	0.0879324	1.98616e-07	9.98045e-06
GO:0009161	ribonucleoside monophosphate metabolic process	4.84129	0.0307913	0.835911	0.089557	2.06398e-07	1.02294e-05
GO:0000375	RNA splicing, via transesterification reactions	0	1	1	0.0793682	2.27213e-07	1.11089e-05
GO:1901990	regulation of mitotic cell cycle phase transition	0	1	1	0.0843269	2.42115e-07	1.16455e-05
GO:0006457	protein folding	0	1	1	0.0845494	2.44626e-07	1.16455e-05
GO:0000377	RNA splicing, via transesterification reactions with bulged adenosine as nucleophile	0	1	1	0.0789993	2.60849e-07	1.20994e-05
GO:0000398	mRNA splicing, via spliceosome	0	1	1	0.0789993	2.60849e-07	1.20994e-05
GO:0022613	ribonucleoprotein complex biogenesis	0	1	1	0.0882676	2.66371e-07	1.21991e-05
GO:0006310	DNA recombination	0	1	1	0.0841404	3.17776e-07	1.43714e-05
GO:0042254	ribosome biogenesis	0	1	1	0.0863703	4.10578e-07	1.81989e-05
GO:0016072	rRNA metabolic process	0	1	1	0.0844458	4.12467e-07	1.81989e-05
GO:0006283	transcription-coupled nucleotide-excision repair	0	1	1	0.0526628	5.03215e-07	2.19353e-05
GO:0015985	energy coupled proton transport, down electrochemical gradient	0	1	1	0.0083166	5.48439e-07	2.33442e-05
GO:0015986	ATP synthesis coupled proton transport	0	1	1	0.0083166	5.48439e-07	2.33442e-05
GO:0009126	purine nucleoside monophosphate metabolic process	4.98831	0.0286049	0.835911	0.0899476	5.65186e-07	2.3504e-05
GO:0009167	purine ribonucleoside monophosphate metabolic process	4.98831	0.0286049	0.835911	0.0899476	5.65186e-07	2.3504e-05
GO:0044770	cell cycle phase transition	0	1	1	0.0890277	6.18509e-07	2.54292e-05
GO:0042770	signal transduction in response to DNA damage	0	1	1	0.0648034	6.58765e-07	2.67799e-05
GO:0048285	organelle fission	1.26238	0.556907	1	0.0969036	6.92342e-07	2.78321e-05
GO:0042776	mitochondrial ATP synthesis coupled proton transport	0	1	1	-0.00204392	8.82674e-07	3.50936e-05
GO:0072331	signal transduction by p53 class mediator	0	1	1	0.0675322	8.96923e-07	3.52725e-05
GO:0044772	mitotic cell cycle phase transition	0	1	1	0.0893484	1.09321e-06	4.24971e-05
GO:0022402	cell cycle process	1.13379	0.541073	1	0.101033	1.10413e-06	4.24971e-05
GO:0002478	antigen processing and presentation of exogenous peptide antigen	0	1	1	0.078203	1.48464e-06	5.65413e-05
GO:0000280	nuclear division	1.34186	0.535432	1	0.0968198	1.60407e-06	6.04534e-05
GO:0007339	binding of sperm to zona pellucida	0	1	1	0.00150066	1.63486e-06	6.09787e-05
GO:0071158	positive regulation of cell cycle arrest	0	1	1	0.0582923	1.91001e-06	7.05144e-05
GO:0006312	mitotic recombination	0	1	1	0.0566182	2.10824e-06	7.70466e-05
GO:0031396	regulation of protein ubiquitination	2.87037	0.304097	1	0.0813679	2.38713e-06	8.63663e-05
GO:0006289	nucleotide-excision repair	0	1	1	0.0732237	2.42168e-06	8.6749e-05
GO:0006260	DNA replication	0	1	1	0.0900706	2.51629e-06	8.91388e-05
GO:0006261	DNA-dependent DNA replication	0	1	1	0.0800628	2.53767e-06	8.91388e-05

## Sheet: Supplemental Table S5D
Supplemental Table S5D. GO enrichment and negative correlation analyses of dnMis-Epi genes during the vRG-to-IPC transition at GW10.
Column "GOBP ID": GO biological process ID.
Columns "Odds ratio", "P value", "FDR": GO enrichment analysis result.
Columns "Average Spearman’s correlation", "P value", "FDR": GO negative correlation analysis result.
No significant GO terms in both GO enrichment and negative correlation analyses.
Significant GO terms only in GO enrichment analysis.
GOBP ID	Name	Odds ratio	P value	FDR	Average Spearman’s correlation	P value	FDR
GO:0051899	membrane depolarization	63.3996	6.30774e-08	0.000228214	0.151946	0.999987	1
GO:0019226	transmission of nerve impulse	103.672	2.12517e-07	0.000384443	0.154155	0.99948	1
GO:0048666	neuron development	11.8703	8.95232e-07	0.000818954	0.132692	1	1
GO:0043524	negative regulation of neuron apoptotic process	34.8991	1.01423e-06	0.000818954	0.120235	0.979599	1
GO:0035637	multicellular organismal signaling	62.9882	1.29492e-06	0.000818954	0.142741	0.998416	1
GO:1901215	negative regulation of neuron death	32.7887	1.35813e-06	0.000818954	0.120988	0.984109	1
GO:0086010	membrane depolarization during action potential	164.628	2.24063e-06	0.00115809	0.180496	0.999104	1
GO:0030182	neuron differentiation	9.9121	3.64226e-06	0.00144903	0.131689	1	1
GO:0031175	neuron projection development	11.4127	3.79435e-06	0.00144903	0.133474	1	1
GO:0048699	generation of neurons	8.64123	4.45984e-06	0.00144903	0.129612	1	1
GO:0007626	locomotory behavior	25.3849	4.48425e-06	0.00144903	0.120919	0.985671	1
GO:0043269	regulation of ion transport	17.2862	4.80608e-06	0.00144903	0.12432	0.999481	1
GO:0007268	synaptic transmission	12.9592	5.77081e-06	0.00145731	0.134742	1	1
GO:0042391	regulation of membrane potential	23.6192	6.2933e-06	0.00145731	0.127178	0.998621	1
GO:0043523	regulation of neuron apoptotic process	23.4112	6.55459e-06	0.00145731	0.120513	0.990036	1
GO:0050877	neurological system process	12.5943	6.89977e-06	0.00145731	0.126896	1	1
GO:0022008	neurogenesis	8.12713	7.38029e-06	0.00145731	0.128913	1	1
GO:0050905	neuromuscular process	39.1783	7.51178e-06	0.00145731	0.130892	0.995817	1
GO:0034765	regulation of ion transmembrane transport	22.4365	7.99151e-06	0.00145731	0.127291	0.999003	1
GO:0008344	adult locomotory behavior	38.4722	8.0559e-06	0.00145731	0.111737	0.742339	1
GO:0048468	cell development	7.93108	9.00537e-06	0.00153103	0.12702	1	1
GO:0034762	regulation of transmembrane transport	21.6949	9.30973e-06	0.00153103	0.125263	0.998109	1
GO:1901214	regulation of neuron death	21.1856	1.04056e-05	0.00161878	0.119654	0.987855	1
GO:0003008	system process	9.82822	1.07382e-05	0.00161878	0.123205	1	1
GO:0007267	cell-cell signaling	9.68729	3.47949e-05	0.00503552	0.127953	1	1
GO:0030030	cell projection organization	8.06285	4.12594e-05	0.0057414	0.125971	1	1
GO:0030534	adult behavior	24.3924	4.42163e-05	0.00592498	0.119769	0.966829	1
GO:0034220	ion transmembrane transport	11.2438	4.95589e-05	0.00640372	0.107084	0.64897	1
GO:0021700	developmental maturation	20.9143	7.83718e-05	0.00977755	0.134724	0.99997	1
GO:0001508	action potential	42.5779	8.26354e-05	0.00996583	0.135042	0.994631	1
Significant GO terms only in GO negative correlation analysis.
GOBP ID	Name	Odds ratio	P value	FDR	Average Spearman’s correlation	P value	FDR
GO:0022900	electron transport chain	4.88115	0.19302	1	0.0145932	8.78364e-27	3.17792e-23
GO:0022904	respiratory electron transport chain	4.93448	0.191169	1	0.0147648	2.43901e-26	4.41217e-23
GO:0045333	cellular respiration	3.40121	0.263816	1	0.0385981	1.73107e-21	2.08766e-18
GO:0006119	oxidative phosphorylation	7.9886	0.123753	0.82255	0.0218986	1.52187e-15	1.37653e-12
GO:0006120	mitochondrial electron transport, NADH to ubiquinone	0	1	1	-0.000631787	4.27603e-15	3.09414e-12
GO:0042773	ATP synthesis coupled electron transport	9.69546	0.103521	0.738732	0.0149058	1.4478e-14	7.48305e-12
GO:0042775	mitochondrial ATP synthesis coupled electron transport	9.69546	0.103521	0.738732	0.0149058	1.4478e-14	7.48305e-12
GO:0042590	antigen processing and presentation of exogenous peptide antigen via MHC class I	0	1	1	0.0290271	1.71482e-13	7.75529e-11
GO:0000278	mitotic cell cycle	2.18729	0.179457	1	0.0833312	2.0051e-13	8.06051e-11
GO:0031145	anaphase-promoting complex-dependent proteasomal ubiquitin-dependent protein catabolic process	0	1	1	0.0332871	2.79365e-13	9.92885e-11
GO:0051436	negative regulation of ubiquitin-protein ligase activity involved in mitotic cell cycle	0	1	1	0.0274301	3.01872e-13	9.92885e-11
GO:0006259	DNA metabolic process	0	1	1	0.0832814	5.00489e-13	1.50897e-10
GO:0002479	antigen processing and presentation of exogenous peptide antigen via MHC class I, TAP-dependent	0	1	1	0.0278561	7.32194e-13	2.03775e-10
GO:0051439	regulation of ubiquitin-protein ligase activity involved in mitotic cell cycle	0	1	1	0.0338349	1.21123e-12	3.13017e-10
GO:0051352	negative regulation of ligase activity	0	1	1	0.0325451	3.99273e-12	9.02856e-10
GO:0051444	negative regulation of ubiquitin-protein transferase activity	0	1	1	0.0325451	3.99273e-12	9.02856e-10
GO:0055114	oxidation-reduction process	3.27532	0.0461747	0.494733	0.0853688	1.62593e-11	3.3566e-09
GO:0007093	mitotic cell cycle checkpoint	0	1	1	0.0606458	1.66995e-11	3.3566e-09
GO:1903047	mitotic cell cycle process	1.56662	0.381983	1	0.0841217	1.95738e-11	3.72726e-09
GO:0051437	positive regulation of ubiquitin-protein ligase activity involved in mitotic cell cycle	0	1	1	0.0355812	4.06114e-11	7.3466e-09
GO:0002474	antigen processing and presentation of peptide antigen via MHC class I	0	1	1	0.044741	7.48644e-11	1.28981e-08
GO:0006091	generation of precursor metabolites and energy	7.44875	0.00330338	0.116121	0.0723665	1.02994e-10	1.69379e-08
GO:0006521	regulation of cellular amino acid metabolic process	0	1	1	0.0259763	1.44023e-10	2.26555e-08
GO:0044774	mitotic DNA integrity checkpoint	0	1	1	0.0487291	1.86557e-10	2.81234e-08
GO:0051351	positive regulation of ligase activity	0	1	1	0.0436768	2.74256e-10	3.96903e-08
GO:0051443	positive regulation of ubiquitin-protein transferase activity	0	1	1	0.0419369	4.1826e-10	5.82025e-08
GO:0051340	regulation of ligase activity	0	1	1	0.0489505	6.98268e-10	9.3568e-08
GO:0000082	G1/S transition of mitotic cell cycle	0	1	1	0.0628791	7.60657e-10	9.37903e-08
GO:0044843	cell cycle G1/S phase transition	0	1	1	0.0628791	7.60657e-10	9.37903e-08
GO:0015992	proton transport	0	1	1	0.0495968	7.77697e-10	9.37903e-08
GO:0006281	DNA repair	0	1	1	0.0812988	8.26348e-10	9.64428e-08
GO:0006818	hydrogen transport	0	1	1	0.0508438	1.02734e-09	1.16153e-07
GO:0051438	regulation of ubiquitin-protein transferase activity	0	1	1	0.047693	1.11485e-09	1.22228e-07
GO:0010948	negative regulation of cell cycle process	0	1	1	0.0719503	1.1948e-09	1.27141e-07
GO:0072401	signal transduction involved in DNA integrity checkpoint	0	1	1	0.0382893	1.48527e-09	1.37787e-07
GO:0072413	signal transduction involved in mitotic cell cycle checkpoint	0	1	1	0.0382893	1.48527e-09	1.37787e-07
GO:0072422	signal transduction involved in DNA damage checkpoint	0	1	1	0.0382893	1.48527e-09	1.37787e-07
GO:1902402	signal transduction involved in mitotic DNA damage checkpoint	0	1	1	0.0382893	1.48527e-09	1.37787e-07
GO:1902403	signal transduction involved in mitotic DNA integrity checkpoint	0	1	1	0.0382893	1.48527e-09	1.37787e-07
GO:0044773	mitotic DNA damage checkpoint	0	1	1	0.0489042	1.65219e-09	1.49441e-07
GO:0033238	regulation of cellular amine metabolic process	0	1	1	0.0391959	1.71646e-09	1.51467e-07
GO:1901991	negative regulation of mitotic cell cycle phase transition	0	1	1	0.067722	2.16924e-09	1.86864e-07
GO:0006310	DNA recombination	0	1	1	0.0728944	2.44762e-09	2.05941e-07
GO:1901988	negative regulation of cell cycle phase transition	0	1	1	0.0681396	2.62683e-09	2.06877e-07
GO:0072431	signal transduction involved in mitotic G1 DNA damage checkpoint	0	1	1	0.0382021	2.63028e-09	2.06877e-07
GO:1902400	intracellular signal transduction involved in G1 DNA damage checkpoint	0	1	1	0.0382021	2.63028e-09	2.06877e-07
GO:0006977	DNA damage response, signal transduction by p53 class mediator resulting in cell cycle arrest	0	1	1	0.0373157	2.70499e-09	2.08227e-07
GO:0000280	nuclear division	0	1	1	0.0838247	3.31982e-09	2.50231e-07
GO:0031398	positive regulation of protein ubiquitination	0	1	1	0.0586223	3.79909e-09	2.7999e-07
GO:0048285	organelle fission	0	1	1	0.0847858	3.86941e-09	2.7999e-07
GO:0006974	cellular response to DNA damage stimulus	0.812822	0.713687	1	0.0858821	4.04202e-09	2.86746e-07
GO:1902600	hydrogen ion transmembrane transport	0	1	1	0.0457071	4.27046e-09	2.97126e-07
GO:0072395	signal transduction involved in cell cycle checkpoint	0	1	1	0.0408153	5.57582e-09	3.80629e-07
GO:0015980	energy derivation by oxidation of organic compounds	8.82885	0.00182239	0.0809645	0.0745735	5.86578e-09	3.93007e-07
GO:0006396	RNA processing	0	1	1	0.0893489	6.11808e-09	4.02459e-07
GO:0000075	cell cycle checkpoint	0	1	1	0.0731301	7.49341e-09	4.70199e-07
GO:0031571	mitotic G1 DNA damage checkpoint	0	1	1	0.0422901	7.53774e-09	4.70199e-07
GO:0044819	mitotic G1/S transition checkpoint	0	1	1	0.0422901	7.53774e-09	4.70199e-07
GO:0006271	DNA strand elongation involved in DNA replication	0	1	1	0.03817	1.91844e-08	1.17643e-06
GO:0022616	DNA strand elongation	0	1	1	0.0397065	2.10103e-08	1.26692e-06
GO:0044783	G1 DNA damage checkpoint	0	1	1	0.0443992	2.31384e-08	1.37237e-06
GO:0022402	cell cycle process	1.70268	0.28274	1	0.0911321	3.32048e-08	1.93766e-06
GO:1901987	regulation of cell cycle phase transition	0	1	1	0.0765174	5.90165e-08	3.38924e-06
GO:0006412	translation	1.41223	0.517302	1	0.0856898	7.49084e-08	4.23467e-06
GO:0031397	negative regulation of protein ubiquitination	0	1	1	0.0584433	8.24257e-08	4.564e-06
GO:0006457	protein folding	0	1	1	0.0765321	8.43016e-08	4.564e-06
GO:0007067	mitotic nuclear division	0	1	1	0.0826481	8.45185e-08	4.564e-06
GO:0030330	DNA damage response, signal transduction by p53 class mediator	0	1	1	0.0523982	8.82194e-08	4.69379e-06
GO:0009123	nucleoside monophosphate metabolic process	2.86264	0.168195	0.996938	0.082953	1.0083e-07	5.2622e-06
GO:1901990	regulation of mitotic cell cycle phase transition	0	1	1	0.0766064	1.01812e-07	5.2622e-06
GO:0008380	RNA splicing	0	1	1	0.0808352	1.06458e-07	5.42484e-06
GO:0044770	cell cycle phase transition	3.56039	0.119801	0.802667	0.0810556	1.11531e-07	5.60443e-06
GO:0046034	ATP metabolic process	3.26615	0.137305	0.867648	0.0821886	1.21708e-07	5.97919e-06
GO:0031570	DNA integrity checkpoint	0	1	1	0.0686173	1.22294e-07	5.97919e-06
GO:0044772	mitotic cell cycle phase transition	3.58834	0.118308	0.797094	0.0811625	1.62764e-07	7.85176e-06
GO:0007005	mitochondrion organization	0	1	1	0.0823234	1.75315e-07	8.34593e-06
GO:0034660	ncRNA metabolic process	0	1	1	0.0863796	2.71469e-07	1.27555e-05
GO:0009161	ribonucleoside monophosphate metabolic process	2.93729	0.161752	0.964119	0.0842781	3.09143e-07	1.43395e-05
GO:0042770	signal transduction in response to DNA damage	0	1	1	0.0592649	3.25806e-07	1.49211e-05
GO:0009126	purine nucleoside monophosphate metabolic process	3.02592	0.154566	0.93439	0.0842609	4.6628e-07	2.08272e-05
GO:0009167	purine ribonucleoside monophosphate metabolic process	3.02592	0.154566	0.93439	0.0842609	4.6628e-07	2.08272e-05
GO:0000077	DNA damage checkpoint	0	1	1	0.0687922	5.23177e-07	2.30836e-05
GO:0006312	mitotic recombination	0	1	1	0.0491758	5.32289e-07	2.32027e-05
GO:0072331	signal transduction by p53 class mediator	0	1	1	0.0626688	6.41299e-07	2.76217e-05
GO:0000377	RNA splicing, via transesterification reactions with bulged adenosine as nucleophile	0	1	1	0.0748536	7.31602e-07	3.07783e-05
GO:0000398	mRNA splicing, via spliceosome	0	1	1	0.0748536	7.31602e-07	3.07783e-05
GO:0000375	RNA splicing, via transesterification reactions	0	1	1	0.075297	7.74405e-07	3.22046e-05
GO:0034470	ncRNA processing	0	1	1	0.0872144	8.00084e-07	3.28944e-05
GO:0007059	chromosome segregation	0	1	1	0.0753544	8.84204e-07	3.59444e-05
GO:0016071	mRNA metabolic process	0	1	1	0.0887213	9.74832e-07	3.91882e-05
GO:0006364	rRNA processing	0	1	1	0.079255	1.20071e-06	4.77381e-05
GO:0002478	antigen processing and presentation of exogenous peptide antigen	3.48064	0.258721	1	0.072762	1.25081e-06	4.91893e-05
GO:0006260	DNA replication	0	1	1	0.0823516	1.32026e-06	5.13623e-05
GO:0006283	transcription-coupled nucleotide-excision repair	0	1	1	0.0493916	1.51377e-06	5.82639e-05
GO:0010564	regulation of cell cycle process	0	1	1	0.0861525	1.63139e-06	6.21302e-05
GO:0042776	mitochondrial ATP synthesis coupled proton transport	0	1	1	0.00454445	2.07736e-06	7.82907e-05
GO:0015985	energy coupled proton transport, down electrochemical gradient	0	1	1	0.0140891	2.22811e-06	8.22581e-05
GO:0015986	ATP synthesis coupled proton transport	0	1	1	0.0140891	2.22811e-06	8.22581e-05
GO:0031396	regulation of protein ubiquitination	0	1	1	0.0744157	2.36836e-06	8.61188e-05
GO:0043161	proteasome-mediated ubiquitin-dependent protein catabolic process	0	1	1	0.0775102	2.38029e-06	8.61188e-05
GO:0071158	positive regulation of cell cycle arrest	0	1	1	0.0553133	2.55352e-06	9.12303e-05
GO:0034622	cellular macromolecular complex assembly	2.45477	0.211077	1	0.0866227	2.572e-06	9.12303e-05
GO:0010498	proteasomal protein catabolic process	0	1	1	0.077857	2.61004e-06	9.16807e-05
GO:0007346	regulation of mitotic cell cycle	3.28984	0.13576	0.861718	0.0843565	2.78068e-06	9.67357e-05
GO:0019884	antigen processing and presentation of exogenous antigen	3.42728	0.262121	1	0.0744108	2.83795e-06	9.77875e-05
