# Supplementary material for: Coexpression enrichment analysis at the single-cell level reveals convergent defects in neural progenitor cells and their cell-type transitions in neurodevelopmental disorders
Source: HighWire-hosted journal article supplement (doi:10.1101/gr.254987.119), 2020-06-01
Supplement: Supplemental_Table_S6.xlsx [file Supplemental_Table_S6.xlsx]

## Sheet: Supplemental Table S6
Supplemental Table S6. CHD8 target gene analysis.
(A) CHD8-activated, -repressed, and -bound genes.
(B) Expression change of CHD8-activated and -repressed target genes during the transition from vRG cells to IPCs at GW10.
(C) Spearman’s correlation between CHD8-activated/-repressed target genes and CHD8 during the transition.
(D) GO terms with FDR ≤0.1 enriched for CHD8-activated target genes.
(E) GO terms with FDR ≤0.1 enriched for CHD8-repressed target genes.

## Sheet: Supplemental Table S6A
Supplemental Table S6A. CHD8-activated, -repressed, and -bound genes.
CHD8-activated at E12.5		CHD8-activated at E14.5		CHD8-activated at E17.5		CHD8-activated at P0		CHD8-activated at adult		CHD8-repressed at E12.5		CHD8-repressed at E14.5		CHD8-repressed at E17.5		CHD8-repressed at P0		CHD8-repressed at adult		CHD8-bound
Gene ID	Symbol	Gene ID	Symbol	Gene ID	Symbol	Gene ID	Symbol	Gene ID	Symbol	Gene ID	Symbol	Gene ID	Symbol	Gene ID	Symbol	Gene ID	Symbol	Gene ID	Symbol	Gene ID	Symbol
100132074	FOXO6	100131755	ARMCX4	10057	ABCC5	100133941	CD24	100133941	CD24	1009	CDH11	10101	NUBP2	10245	TIMM17B	10100	TSPAN2	100128731	OST4	10042	HMGXB4
1002	CDH4	100507421	TMEM178B	10181	RBM5	10024	TROAP	1002	CDH4	10095	ARPC1B	10126	DNAL4	10383	TUBB4B	10229	COQ7	10016	PDCD6	10106	CTDSP2
10046	MAMLD1	10057	ABCC5	10200	MPHOSPH6	10051	SMC4	1019	CDK4	10114	HIPK3	1019	CDK4	10422	UBAC1	10233	LRRC23	10130	PDIA6	10114	HIPK3
10125	RASGRP1	10075	HUWE1	10206	TRIM13	10112	KIF20A	10227	MFSD10	10150	MBNL2	10201	NME6	10445	MCRS1	10267	RAMP1	10134	BCAP31	10116	FEM1B
10195	ALG3	10129	FRY	10227	MFSD10	10200	MPHOSPH6	10270	AKAP8	10160	FARP1	10252	SPRY1	10518	CIB2	10290	SPEG	10267	RAMP1	10137	RBM12
10382	TUBB4A	10142	AKAP9	10270	AKAP8	10234	LRRC17	1028	CDKN1C	10163	WASF2	10262	SF3B4	10534	SSSCA1	10435	CDC42EP2	10282	BET1	10147	SUGP2
10446	LRRN2	10144	FAM13A	10282	BET1	1027	CDKN1B	10293	TRAIP	10186	LHFP	10263	CDK2AP2	10539	GLRX3	10445	MCRS1	10402	ST3GAL6	10190	TXNDC9
10493	VAT1	10178	TENM1	10283	CWC27	1028	CDKN1C	10297	APC2	10227	MFSD10	10330	CNPY2	10573	MRPL28	10519	CIB1	10404	CPQ	10236	HNRNPR
10505	SEMA4F	10721	POLQ	10482	NXF1	10282	BET1	10381	TUBB3	10234	LRRC17	10376	TUBA1B	10608	MXD4	10522	DEAF1	10456	HAX1	10250	SRRM1
10614	HEXIM1	10725	NFAT5	10541	ANP32B	10393	ANAPC10	10500	SEMA6C	10290	SPEG	10393	ANAPC10	10975	UQCR11	107	ADCY1	10476	ATP5H	10254	STAM2
10656	KHDRBS3	10746	MAP3K2	1062	CENPE	10403	NDC80	10592	SMC2	1036	CDO1	10436	EMG1	11018	TMED1	10734	STAG3	10519	CIB1	10270	AKAP8
10687	PNMA2	10752	CHL1	10628	TXNIP	10412	NSA2	10615	SPAG5	10371	SEMA3A	10445	MCRS1	11113	CIT	10873	ME3	10598	AHSA1	10274	STAG1
10716	TBR1	10802	SEC24A	10635	RAD51AP1	10512	SEMA3C	10752	CHL1	10491	CRTAP	10489	LRRC41	11180	WDR6	10903	MTMR11	10668	CGRRF1	10283	CWC27
10742	RAI2	10915	TCERG1	10644	IGF2BP2	10541	ANP32B	10763	NES	10512	SEMA3C	10557	RPP38	11224	RPL35	10908	PNPLA6	10678	B3GNT2	10311	DSCR3
10814	CPLX2	11064	CNTRL	10659	CELF2	1058	CENPA	10773	ZBTB6	10627	MYL12A	1058	CENPA	11243	PMF1	11007	CCDC85B	10749	KIF1C	10454	TAB1
10817	FRS3	11113	CIT	1070	CETN3	10615	SPAG5	10898	CPSF4	10653	SPINT2	10591	DNPH1	11258	DCTN3	11180	WDR6	10808	HSPH1	10521	DDX17
10962	MLLT11	11190	CEP250	10716	TBR1	1062	CENPE	11064	CNTRL	10769	PLK2	10629	TAF6L	11285	B4GALT7	11182	SLC2A6	10924	SMPDL3A	10522	DEAF1
11075	STMN2	11214	AKAP13	10725	NFAT5	10628	TXNIP	11078	TRIOBP	11098	PRSS23	10667	FARS2	11315	PARK7	11186	RASSF1	10963	STIP1	10541	ANP32B
11076	TPPP	114299	PALM2	10765	KDM5B	1063	CENPF	11129	CLASRP	11135	CDC42EP1	10783	NEK6	11332	ACOT7	112611	RWDD2A	11098	PRSS23	10614	HEXIM1
11133	KPTN	114784	CSMD2	10772	SRSF10	10642	IGF2BP1	11189	CELF3	11167	FSTL1	10897	YIF1A	11345	GABARAPL2	11282	MGAT4B	11112	HIBADH	10627	MYL12A
11247	NXPH4	114785	MBD6	10807	SDCCAG3	10716	TBR1	112885	PHF21B	113189	CHST14	10935	PRDX3	1137	CHRNA4	113	ADCY7	11164	NUDT5	10650	SLMO1
1141	CHRNB2	114788	CSMD3	10915	TCERG1	10763	NES	11329	STK38	11328	FKBP9	10938	EHD1	114900	C1QTNF4	11343	MGLL	11170	FAM107A	10664	CTCF
114294	LACTB	114803	MYSM1	11064	CNTRL	10797	MTHFD2	114823	LENG8	114299	PALM2	10959	TMED2	114991	ZNF618	1137	CHRNA4	11235	PDCD10	1070	CETN3
114787	GPRIN1	114823	LENG8	11190	CEP250	10926	DBF4	1153	CIRBP	114823	LENG8	11020	IFT27	116448	OLIG1	114900	C1QTNF4	112611	RWDD2A	1073	CFL2
114795	TMEM132B	116931	MED12L	112885	PHF21B	11004	KIF2C	125058	TBC1D16	114904	C1QTNF6	11065	UBE2C	116541	MRPL54	115416	MALSU1	11341	SCRG1	10743	RAI1
114804	RNF157	1195	CLK1	1147	CHUK	11051	NUDT21	1277	COL1A1	115207	KCTD12	11070	TMEM115	1175	AP2S1	115708	TRMT61A	11342	RNF13	10766	TOB2
116986	AGAP2	120114	FAT3	114823	LENG8	11062	DUS4L	1278	COL1A2	115209	OMA1	11072	DUSP14	117583	PARD3B	116135	LRRC3B	113444	SMIM12	10771	ZMYND11
117145	THEM4	1303	COL12A1	115294	PCMTD1	11065	UBE2C	128077	LIX1L	115908	CTHRC1	11151	CORO1A	120103	SLC36A4	116448	OLIG1	11345	GABARAPL2	10787	NCKAP1
124925	SEZ6	134957	STXBP5	116228	COX20	112885	PHF21B	1282	COL4A1	116985	ARAP1	11164	NUDT5	122809	SOCS4	116986	AGAP2	1191	CLU	10806	SDCCAG8
1268	CNR1	1387	CREBBP	116843	SLC18B1	113130	CDCA5	1284	COL4A2	118429	ANTXR2	112399	EGLN3	123096	SLC25A29	117	ADCYAP1R1	119710	C11orf74	10890	RAB10
128414	NKAIN4	139231	FAM199X	118924	FRA10AC1	11339	OIP5	1291	COL6A1	1191	CLU	11339	OIP5	124446	TMEM219	117178	SSX2IP	1203	CLN5	10933	MORF4L1
128434	VSTM2L	140890	SREK1	118980	SFXN2	114907	FBXO32	1292	COL6A2	121227	LRIG3	113878	DTX2	124995	MRPL10	120	ADD3	124936	CYB5D2	10949	HNRNPA0
134111	UBE2QL1	1462	VCAN	119392	SFR1	114908	TMEM123	1301	COL11A1	122786	FRMD6	114904	C1QTNF6	125058	TBC1D16	123096	SLC25A29	126328	NDUFA11	10957	PNRC1
1374	CPT1A	147372	CCBE1	1195	CLK1	116228	COX20	1303	COL12A1	123920	CMTM3	1154	CISH	125988	C19orf70	124637	CYB5D1	128414	NKAIN4	10972	TMED10
138046	RALYL	151613	TTC14	1200	TPP1	1163	CKS1B	1307	COL16A1	126119	JOSD2	115908	CTHRC1	126328	NDUFA11	1263	PLK3	132	ADK	11034	DSTN
1400	CRMP1	153129	SLC38A9	1201	CLN3	123803	NTAN1	133619	PRRC1	1265	CNN2	115992	RNF166	127281	FAM213B	126328	NDUFA11	132299	OCIAD2	1106	CHD2
140767	NRSN1	153733	CCDC112	125950	RAVER1	1282	COL4A1	1400	CRMP1	1277	COL1A1	1174	AP1S1	127933	UHMK1	1272	CNTN1	1327	COX4I1	11066	SNRNP35
143279	HECTD2	154796	AMOT	1265	CNN2	1288	COL4A6	140710	SOGA1	1278	COL1A2	122961	ISCA2	128414	NKAIN4	127687	C1orf122	1347	COX7A2	11079	RER1
145581	LRFN5	155435	RBM33	1277	COL1A1	1301	COL11A1	143458	LDLRAD3	1281	COL3A1	124222	PAQR4	128434	VSTM2L	128272	ARHGEF19	1363	CPE	11083	DIDO1
146713	RBFOX3	157	ADRBK2	1282	COL4A1	131076	CCDC58	143684	FAM76B	1284	COL4A2	124512	METTL23	131616	TMEM42	131096	KCNH8	137872	ADHFE1	11100	HNRNPUL1
148252	DIRAS1	158931	TCEAL6	1291	COL6A1	143282	FGFBP3	146198	ZFP90	1290	COL5A2	126119	JOSD2	1329	COX5B	134121	C5orf49	1390	CREM	11124	FAF1
149175	MANEAL	161436	EML5	129303	TMEM150A	146909	KIF18B	1462	VCAN	1291	COL6A1	127687	C1orf122	138311	FAM69B	134353	LSM11	139341	FUNDC1	11154	AP4S1
1523	CUX1	1760	DMPK	129450	TYW5	147841	SPC24	147372	CCBE1	1292	COL6A2	1277	COL1A1	140465	MYL6B	134549	SHROOM1	1404	HAPLN1	11234	HPS5
158931	TCEAL6	1778	DYNC1H1	1299	COL9A3	150468	CKAP2L	147495	APCDD1	1297	COL9A1	131616	TMEM42	143686	SESN3	1363	CPE	140576	S100A16	112495	GTF3C6
1600	DAB1	1795	DOCK3	1301	COL11A1	151011	SEPT10	149076	ZNF362	1298	COL9A2	132001	TAMM41	144717	FAM109A	1404	HAPLN1	140609	NEK7	11273	ATXN2L
1602	DACH1	19	ABCA1	1345	COX6C	151050	KANSL1L	151613	TTC14	1299	COL9A3	1345	COX6C	147015	DHRS13	140576	S100A16	1410	CRYAB	113251	LARP4
161145	TMEM229B	192669	AGO3	140890	SREK1	152007	GLIPR2	153733	CCDC112	1301	COL11A1	138241	C9orf85	148223	C19orf25	140767	NRSN1	144363	LYRM5	11338	U2AF2
1630	DCC	1952	CELSR2	1462	VCAN	154007	SNRNP48	155435	RBM33	1303	COL12A1	138311	FAM69B	149603	RNF187	1408	CRY2	1465	CSRP1	114781	BTBD9
1632	ECI1	196441	ZFC3H1	147372	CCBE1	157313	CDCA2	161145	TMEM229B	1307	COL16A1	143244	EIF5AL1	1537	CYC1	1436	CSF1R	1471	CST3	114785	MBD6
170463	SSBP4	200424	TET3	1497	CTNS	157570	ESCO2	1630	DCC	132949	AASDH	1468	SLC25A10	154791	C7orf55	145773	FAM81A	1476	CSTB	115098	CCDC124
1740	DLG2	2074	ERCC6	151613	TTC14	157697	ERICH1	1641	DCX	1381	CRABP1	147912	SIX5	158	ADSL	146223	CMTM4	148223	C19orf25	1153	CIRBP
1742	DLG4	2186	BPTF	1520	CTSS	162681	C18orf54	167691	LCA5	1404	HAPLN1	148223	C19orf25	162989	DEDD2	1468	SLC25A10	1520	CTSS	115426	UHRF2
18	ABAT	2195	FAT1	153396	TMEM161B	1638	DCT	1745	DLX1	143888	KDELC2	149840	C20orf196	163131	ZNF780B	148741	ANKRD35	154791	C7orf55	115752	DIS3L
1804	DPP6	2201	FBN2	154007	SNRNP48	1649	DDIT3	1808	DPYSL2	144165	PRICKLE1	1537	CYC1	1650	DDOST	149840	C20orf196	1632	ECI1	118424	UBE2J2
1808	DPYSL2	221037	JMJD1C	161436	EML5	165055	CCDC138	1809	DPYSL3	1465	CSRP1	1634	DCN	1725	DHPS	150	ADRA2A	164633	CABP7	1198	CLK3
1826	DSCAM	221981	THSD7A	1634	DCN	1894	ECT2	1948	EFNB2	147372	CCBE1	1635	DCTD	1846	DUSP4	151195	CCNYL1	170622	COMMD6	1209	CLPTM1
1843	DUSP1	22874	PLEKHA6	1655	DDX5	1933	EEF1B2	1951	CELSR3	147912	SIX5	1638	DCT	1861	TOR1A	151473	SLC16A14	171586	ABHD3	1213	CLTC
1845	DUSP3	22941	SHANK2	166968	MIER3	1978	EIF4EBP1	197335	WDR90	151613	TTC14	197370	NSMCE1	197370	NSMCE1	1520	CTSS	1734	DIO2	124401	ANKS3
1846	DUSP4	22999	RIMS1	167691	LCA5	200916	RPL22L1	201191	SAMD14	152007	GLIPR2	200916	RPL22L1	200205	IBA57	1524	CX3CR1	1831	TSC22D3	124790	HEXIM2
1917	EEF1A2	23001	WDFY3	1738	DLD	201161	CENPV	201255	LRRC45	1634	DCN	2010	EMD	201931	TMEM192	1534	CYB561	200916	RPL22L1	124935	SLC43A2
196500	PIANP	23013	SPEN	1760	DMPK	2018	EMX2	203068	TUBB	165	AEBP1	201254	STRA13	219287	AMER2	154881	KCTD7	205251	LINC00116	124936	CYB5D2
199857	ALG14	23025	UNC13A	1958	EGR1	2146	EZH2	2048	EPHB2	166785	MMAA	2016	EMX1	219738	C10orf35	160851	DGKH	2053	EPHX2	126208	ZNF787
2016	EMX1	23040	MYT1L	196441	ZFC3H1	220134	SKA1	204962	SLC44A5	1903	S1PR3	2040	STOM	220164	DOK6	161253	REM2	2108	ETFA	126299	ZNF428
2026	ENO2	23043	TNIK	200014	CC2D1B	221150	SKA3	2149	F2R	1945	EFNA4	205	AK4	220929	ZNF438	171586	ABHD3	2152	F3	126792	B3GALT6
2047	EPHB1	23049	SMG1	200186	CRTC2	221302	ZUFSP	2171	FABP5	1953	MEGF6	2063	NR2F6	222865	TMEM130	18	ABAT	2181	ACSL3	127829	ARL8A
204962	SLC44A5	23054	NCOA6	201255	LRRC45	221687	RNF182	2173	FABP7	197335	WDR90	2064	ERBB2	22854	NTNG1	191	AHCY	220323	OAF	132864	CPEB2
205147	AMER3	23067	SETD1B	203054	ADCK5	22882	ZHX2	2195	FAT1	197370	NSMCE1	220323	OAF	230	ALDOC	1910	EDNRB	22824	HSPA4L	134510	UBLCP1
2115	ETV1	23077	MYCBP2	2045	EPHA7	2290	FOXG1	221656	KDM1B	203054	ADCK5	221908	PPP1R35	23061	TBC1D9B	197335	WDR90	2289	FKBP5	134957	STXBP5
2119	ETV5	23091	ZC3H13	2189	FANCG	22974	TPX2	222962	SLC29A4	2050	EPHB4	22845	DOLK	23089	PEG10	1992	SERPINB1	22890	ZBTB1	1384	CRAT
221955	DAGLB	23092	ARHGAP26	220988	HNRNPA3	2305	FOXM1	223082	ZNRF2	2059	EPS8	23395	LARS2	23090	ZNF423	203197	C9orf91	230	ALDOC	1386	ATF2
222008	VSTM2A	23112	TNRC6B	222194	RSBN1L	23066	CAND2	22846	VASH1	2064	ERBB2	23421	ITGB3BP	23245	ASTN2	203259	FAM219A	23089	PEG10	140890	SREK1
222255	ATXN7L1	23195	MDN1	22823	MTF2	23150	FRMD4B	22858	ICK	214	ALCAM	23452	ANGPTL2	23246	BOP1	205	AK4	23209	MLC1	140901	STK35
222865	TMEM130	23215	PRRC2C	22889	KIAA0907	23514	SPIDR	22897	CEP164	2176	FANCC	23464	GCAT	23313	KIAA0930	2063	NR2F6	23423	TMED3	1432	MAPK14
222950	NYAP1	23224	SYNE2	22944	KIN	23564	DDAH2	23026	MYO16	2201	FBN2	23474	ETHE1	23328	SASH1	2166	FAAH	2354	FOSB	143384	CACUL1
22876	INPP5F	23250	ATP11A	23137	SMC5	23658	LSM5	23036	ZNF292	220323	OAF	23580	CDC42EP4	23395	LARS2	2182	ACSL4	23753	SDF2L1	149420	PDIK1L
22882	ZHX2	23253	ANKRD12	23435	TARDBP	23683	PRKD3	23046	KIF21B	221935	SDK1	23583	SMUG1	23464	GCAT	2194	FASN	2519	FUCA2	150864	FAM117B
22924	MAPRE3	23269	MGA	23451	SF3B1	25847	ANAPC13	23119	HIC2	222663	SCUBE3	23625	FAM89B	23467	NPTXR	221184	CPNE2	2535	FZD2	152137	CCDC50
230	ALDOC	23272	FAM208A	23528	ZNF281	25901	CCDC28A	23150	FRMD4B	22995	CEP152	23636	NUP62	23509	POFUT1	221927	BRAT1	254170	FBXO33	155435	RBM33
23087	TRIM35	23314	SATB2	255967	PAN3	259266	ASPM	2316	FLNA	2316	FLNA	23753	SDF2L1	23583	SMUG1	23092	ARHGAP26	25840	METTL7A	160418	TMTC3
23209	MLC1	23334	SZT2	25792	CIZ1	26064	RAI14	2317	FLNB	23194	FBXL7	24140	FTSJ1	23640	HSPBP1	23108	RAP1GAP2	25874	MPC2	161742	SPRED1
23221	RHOBTB2	23345	SYNE1	25950	RWDD3	26118	WSB1	23195	MDN1	23315	SLC9A8	254263	CNIH2	252839	TMEM9	23209	MLC1	25901	CCDC28A	164	AP1G1
23236	PLCB1	23348	DOCK9	25957	PNISR	26271	FBXO5	23224	SYNE2	23344	ESYT1	25798	BRI3	256281	NUDT14	23328	SASH1	261729	STEAP2	1655	DDX5
23410	SIRT3	23352	UBR4	26118	WSB1	26586	CKAP2	23240	KIAA0922	23452	ANGPTL2	25841	ABTB2	2584	GALK1	23336	SYNM	26275	HIBCH	171017	ZNF384
23542	MAPK8IP2	23365	ARHGEF12	26985	AP3M1	26959	HBP1	23314	SATB2	23493	HEY2	25979	DHRS7B	25841	ABTB2	23467	NPTXR	2628	GATM	1737	DLAT
23544	SEZ6L	23376	UFL1	26993	AKAP8L	27295	PDLIM3	23331	TTC28	256471	MFSD8	26022	TMEM98	25906	ANAPC15	2354	FOSB	26521	TIMM8B	1848	DUSP6
23623	RUSC1	23405	DICER1	27292	DIMT1	27443	CECR2	23334	SZT2	25957	PNISR	2619	GAS1	25920	NELFB	23646	PLD3	26589	MRPL46	1859	DYRK1A
23632	CA14	23476	BRD4	2744	GLS	2819	GPD1	23564	DDAH2	25987	TSKU	26227	PHGDH	26151	NAT9	24141	LAMP5	2670	GFAP	196528	ARID2
23671	TMEFF2	23499	MACF1	275	AMT	283248	RCOR2	23670	TMEM2	26010	SPATS2L	26472	PPP1R14B	26249	KLHL3	252995	FNDC5	26973	CHORDC1	1974	EIF4A2
254263	CNIH2	23504	RIMBP2	280	AMY2B	283431	GAS2L3	2521	FUS	26118	WSB1	27147	DENND2A	26297	SERGEF	2542	SLC37A4	27068	PPA2	1975	EIF4B
2562	GABRB3	23524	SRRM2	283464	GXYLT1	284217	LAMA1	25862	USP49	2628	GATM	27258	LSM3	266812	NAP1L5	2571	GAD1	27089	UQCRQ	1982	EIF4G2
25758	KIAA1549L	23607	CD2AP	284001	CCDC57	285331	CCDC66	25957	PNISR	26578	OSTF1	27301	APEX2	2674	GFRA1	25769	SLC24A2	27243	CHMP2A	1983	EIF5
25789	TMEM59L	253260	RICTOR	284217	LAMA1	286827	TRIM59	26040	SETBP1	2677	GGCX	27338	UBE2S	2689	GH2	25854	FAM149A	2752	GLUL	1994	ELAVL1
2583	B4GALNT1	254048	UBN2	285331	CCDC66	29028	ATAD2	26064	RAI14	27243	CHMP2A	27346	TMEM97	27	ABL2	25886	POC1A	2791	GNG11	200205	IBA57
25830	SULT4A1	2572	GAD2	286410	ATP11C	2946	GSTM2	26118	WSB1	285753	CEP57L1	2745	GLRX	27089	UQCRQ	26012	NSMF	283871	PGP	200424	TET3
25929	GEMIN5	25758	KIAA1549L	2891	GRIA2	29946	SERTAD3	26153	KIF26A	286205	SCAI	2768	GNA12	27147	DENND2A	2670	GFAP	284184	C17orf89	2005	ELK4
2596	GAP43	259282	BOD1L1	28985	MCTS1	29952	DPP7	27092	CACNG4	29015	SLC43A3	2783	GNB2	27253	PCDH17	27254	CSDC2	284207	METRNL	200728	TMEM17
26049	FAM169A	25957	PNISR	29066	ZC3H7A	3005	H1F0	27319	BHLHE22	2934	GSN	2787	GNG5	27304	MOCS3	27344	PCSK1N	286144	TRIQK	200734	SPRED2
26059	ERC2	26011	TENM4	29078	NDUFAF4	3021	H3F3B	27324	TOX3	2990	GUSB	283871	PGP	27344	PCSK1N	2788	GNG7	29071	C1GALT1C1	2011	MARK2
26470	SEZ6L2	26038	CHD5	29090	TIMM21	3148	HMGB2	2742	GLRA2	29937	NENF	283899	INO80E	283871	PGP	283643	C14orf80	29103	DNAJC15	2029	ENSA
26575	RGS17	26052	DNM3	29889	GNL2	3151	HMGN2	280	AMY2B	29957	SLC25A24	28511	NKIRAS2	284434	NWD1	283871	PGP	2923	PDIA3	2033	EP300
27254	CSDC2	26053	AUTS2	29952	DPP7	3161	HMMR	284001	CCDC57	29969	MDFIC	2878	GPX3	28511	NKIRAS2	284004	HEXDC	2947	GSTM3	2079	ERH
273	AMPH	26115	TANC2	29957	SLC25A24	3178	HNRNPA1	285590	SH3PXD2B	30008	EFEMP2	29099	COMMD9	286144	TRIQK	284106	CISD3	29796	UQCR10	2107	ETF1
27319	BHLHE22	26575	RGS17	3015	H2AFZ	3189	HNRNPH3	28969	BZW2	30061	SLC40A1	29107	NXT1	286148	DPY19L4	284184	C17orf89	29950	SERTAD1	220988	HNRNPA3
27344	PCSK1N	26960	NBEA	309	ANXA6	3257	HPS1	29911	HOOK2	302	ANXA2	2934	GSN	286319	TUSC1	284207	METRNL	29968	PSAT1	221496	LEMD2
2742	GLRA2	27327	TNRC6A	3148	HMGB2	332	BIRC5	30811	HUNK	3046	HBE1	2937	GSS	2876	GPX1	284434	NWD1	3029	HAGH	222008	VSTM2A
2775	GNAO1	27445	PCLO	3178	HNRNPA1	3398	ID2	3257	HPS1	3048	HBG2	2948	GSTM4	2879	GPX4	285367	RPUSD3	3033	HADH	222658	KCTD20
2785	GNG3	275	AMT	3181	HNRNPA2B1	347	APOD	3321	IGSF3	3050	HBZ	29920	PYCR2	28955	DEXI	285368	PRRT3	3074	HEXB	22827	PUF60
2788	GNG7	2803	GOLGA4	3187	HNRNPH1	347252	IGFBPL1	340533	KIAA2022	308	ANXA5	29928	TIMM22	28989	NTMT1	285973	ATG9B	308	ANXA5	22838	RNF44
28232	SLCO3A1	2804	GOLGB1	3257	HPS1	347735	SERINC2	3417	IDH1	309	ANXA6	29946	SERTAD3	28991	COMMD5	2934	GSN	311	ANXA11	22841	RAB11FIP2
284161	GDPD1	283450	HECTD4	345778	MTX3	348235	SKA2	342357	ZKSCAN2	310	ANXA7	3265	HRAS	28998	MRPL13	29886	SNX8	3251	HPRT1	22926	ATF6
2845	GPR22	283464	GXYLT1	374618	TEX9	3486	IGFBP3	347733	TUBB2B	3145	HMBS	3336	HSPE1	2913	GRM3	2990	GUSB	3304	HSPA1B	22929	SEPHS1
286097	MICU3	284339	TMEM145	375444	C5orf34	3491	CYR61	3642	INSM1	3321	IGSF3	339448	C1orf174	2971	GTF3A	29950	SERTAD1	3309	HSPA5	22938	SNW1
2890	GRIA1	285172	FAM126B	388272	C16orf87	3642	INSM1	375790	AGRN	3371	TNC	3399	ID3	29796	UQCR10	3032	HADHB	3320	HSP90AA1	22980	TCF25
2891	GRIA2	285175	UNC80	388507	ZNF788	3832	KIF11	388228	SBK1	3397	ID1	345757	FAM174A	2987	GUK1	3074	HEXB	3336	HSPE1	23001	WDFY3
29035	C16orf72	285527	FRYL	389677	RBM12B	3835	KIF22	390	RND3	3399	ID3	347734	SLC35B2	29968	PSAT1	30815	ST6GALNAC6	3397	ID1	23042	PDXDC1
29968	PSAT1	286205	SCAI	3912	LAMB1	387640	SKIDA1	3912	LAMB1	347	APOD	348995	NUP43	29985	SLC39A3	311	ANXA11	3399	ID3	23067	SETD1B
333	APLP1	287	ANK2	3953	LEPR	388507	ZNF788	3925	STMN1	348	APOE	374882	TMEM205	3014	H2AFX	3306	HSPA2	345757	FAM174A	23081	KDM4C
347735	SERINC2	288	ANK3	3956	LGALS1	401466	C8orf59	399664	MEX3D	3486	IGFBP3	3858	KRT10	317762	CCDC85C	3338	DNAJC4	347	APOD	23118	TAB2
3622	ING2	2891	GRIA2	4013	VWA5A	4052	LTBP1	4001	LMNB1	3487	IGFBP4	387914	SHISA2	3336	HSPE1	3356	HTR2A	3475	IFRD1	23131	GPATCH8
3625	INHBB	2977	GUCY1A2	401466	C8orf59	4116	MAGOH	4013	VWA5A	348793	WDR53	388585	HES5	339448	C1orf174	338699	ANKRD42	348	APOE	23132	RAD54L2
3766	KCNJ10	29994	BAZ2B	4026	LPP	4176	MCM7	403341	ZBTB34	3491	CYR61	389792	IER5L	345630	FBLL1	3416	IDE	3766	KCNJ10	23163	GGA3
3780	KCNN1	3097	HIVEP2	4144	MAT2A	4192	MDK	4047	LSS	3590	IL11RA	3921	RPSA	347734	SLC35B2	347734	SLC35B2	3798	KIF5A	23199	GSE1
3785	KCNQ2	324	APC	4239	MFAP4	4232	MEST	4082	MARCKS	359845	FAM101B	3956	LGALS1	348	APOE	348	APOE	388419	BTBD17	23201	FAM168A
379	ARL4D	340533	KIAA2022	4288	MKI67	4239	MFAP4	414918	DENND6B	3703	STT3A	4004	LMO1	3696	ITGB8	359845	FAM101B	388753	COA6	23210	JMJD6
387914	SHISA2	342357	ZKSCAN2	4430	MYO1B	4288	MKI67	4174	MCM5	3714	JAG2	4015	LOX	3727	JUND	3726	JUNB	388789	LINC00493	23211	ZC3H4
388021	TMEM179	345778	MTX3	4670	HNRNPM	4320	MMP11	4175	MCM6	3911	LAMA5	401505	TOMM5	3757	KCNH2	375287	RBM43	389203	SMIM20	23248	RPRD2
388135	C15orf59	3480	IGF1R	4678	NASP	4661	MYT1	4176	MCM7	3912	LAMB1	4069	LYZ	387119	CEP85L	3757	KCNH2	3945	LDHB	23253	ANKRD12
3897	L1CAM	3708	ITPR1	4691	NCL	4678	NASP	4330	MN1	3956	LGALS1	4085	MAD2L1	387509	GPR153	3766	KCNJ10	401152	C4orf3	23264	ZC3H7B
400793	C1orf226	3747	KCNC2	4760	NEUROD1	468	ATF4	4440	MSI1	397	ARHGDIB	4232	MEST	388419	BTBD17	384	ARG2	4155	MBP	23269	MGA
402665	IGLON5	375449	MAST4	4848	CNOT2	4760	NEUROD1	4610	MYCL	3977	LIFR	4242	MFNG	391356	PTRHD1	3858	KRT10	4281	MID1	23276	KLHL18
41	ASIC1	3778	KCNMA1	4850	CNOT4	4761	NEUROD2	4661	MYT1	3995	FADS3	4259	MGST3	400	ARL1	387509	GPR153	432369	ATP5EP2	23332	CLASP1
4133	MAP2	389421	LIN28B	4852	NPY	4774	NFIA	4678	NASP	4000	LMNA	4281	MID1	400916	CHCHD10	388585	HES5	4501	MT1X	23350	U2SURP
4137	MAPT	4008	LMO7	4882	NPR2	4808	NHLH2	4760	NEUROD1	400451	FAM174B	432369	ATP5EP2	4013	VWA5A	388963	C2orf81	4502	MT2A	23365	ARHGEF12
4294	MAP3K10	400954	EML6	4929	NR4A2	4811	NID1	4774	NFIA	4013	VWA5A	439	ASNA1	415116	PIM3	3949	LDLR	4504	MT3	23378	RRP8
4324	MMP15	4026	LPP	5000	ORC4	4841	NONO	4781	NFIB	4015	LOX	4701	NDUFA7	4155	MBP	3995	FADS3	4594	MUT	23383	MAU2
4345	CD200	4035	LRP1	50804	MYEF2	4869	NPM1	4800	NFYA	4026	LPP	4712	NDUFB6	4240	MFGE8	399947	C11orf87	4616	GADD45B	23386	NUDCD3
4355	MPP2	4131	MAP1B	51105	PHF20L1	493869	GPX8	4811	NID1	4052	LTBP1	475	ATOX1	4248	MGAT3	4093	SMAD9	4694	NDUFA1	23390	ZDHHC17
440730	TRIM67	4194	MDM4	51136	RNFT1	51053	GMNN	4854	NOTCH3	4072	EPCAM	4809	NHP2L1	4249	MGAT5	415116	PIM3	4697	NDUFA4	23392	KIAA0368
441518	FAM127C	4297	KMT2A	51162	EGFL7	51203	NUSAP1	4904	YBX1	4094	MAF	4814	NINJ1	4259	MGST3	4155	MBP	4708	NDUFB2	23394	ADNP
4675	NAP1L3	440193	CCDC88C	51312	SLC25A37	51247	PAIP2	4957	ODF2	4124	MAN2A1	4833	NME4	432369	ATP5EP2	4281	MID1	4709	NDUFB3	23446	SLC44A1
4684	NCAM1	4627	MYH9	51547	SIRT7	51278	IER5	5050	PAFAH1B3	414918	DENND6B	4860	PNP	4324	MMP15	4597	MVD	4711	NDUFB5	23468	CBX5
4692	NDN	4628	MYH10	51566	ARMCX3	51474	LIMA1	5090	PBX3	4194	MDM4	51042	ZNF593	4357	MPST	4598	MVK	4712	NDUFB6	23484	LEPROTL1
4761	NEUROD2	463	ZFHX3	51668	HSPB11	51706	CYB5R1	50937	CDON	4215	MAP3K3	51065	RPS27L	4504	MT3	4745	NELL1	4714	NDUFB8	23522	KAT6B
4774	NFIA	4644	MYO5A	51691	NAA38	51720	UIMC1	51155	HN1	4239	MFAP4	51067	YARS2	4598	MVK	476	ATP1A1	4715	NDUFB9	23543	RBFOX2
478	ATP1A3	4649	MYO9A	51706	CYB5R1	51747	LUC7L3	5125	PCSK5	4291	MLF1	51142	CHCHD2	463	ZFHX3	481	ATP1B1	4717	NDUFC1	23588	KLHDC2
4781	NFIB	4659	PPP1R12A	51720	UIMC1	5347	PLK1	51291	GMIP	4313	MMP2	51234	EMC4	4692	NDN	482	ATP1B2	4728	NDUFS8	23598	PATZ1
4784	NFIX	472	ATM	51747	LUC7L3	5352	PLOD2	51339	DACT1	4552	MTRR	51293	CD320	4701	NDUFA7	4835	NQO2	4780	NFE2L2	23633	KPNA6
4884	NPTX1	473	RERE	5203	PFDN4	5371	PML	5150	PDE7A	4603	MYBL1	51324	SPG21	4714	NDUFB8	4856	NOV	4835	NQO2	23741	EID1
491	ATP2B2	4741	NEFM	5325	PLAGL1	5427	POLE2	51564	HDAC7	4627	MYH9	51429	SNX9	4728	NDUFS8	503542	SPRN	4860	PNP	2521	FUS
4916	NTRK3	4750	NEK1	5352	PLOD2	54443	ANLN	5287	PIK3C2B	463	ZFHX3	51523	CXXC5	4733	DRG1	5051	PAFAH2	4885	NPTX2	253461	ZBTB38
50651	SLC45A1	4763	NF1	5358	PLS3	54469	ZFAND6	54329	GPR85	4641	MYO1C	51529	ANAPC11	4745	NELL1	5091	PC	493911	PHOSPHO2	2551	GABPA
50861	STMN3	4810	NHS	5371	PML	54478	FAM64A	54331	GNG2	4665	NAB2	51596	CUTA	4747	NEFL	5092	PCBD1	5033	P4HA1	2553	GABPB1
50937	CDON	4820	NKTR	5411	PNN	54535	CCHCR1	54454	ATAD2B	4776	NFATC4	51629	SLC25A39	475	ATOX1	51016	EMC9	50865	HEBP1	255967	PAN3
51201	ZDHHC2	494470	RNF165	5430	POLR2A	5454	POU3F2	5451	POU2F1	4811	NID1	5165	PDK3	4810	NHS	51027	BOLA1	51021	MRPS16	257415	FAM133B
51209	RAB9B	5108	PCM1	54495	TMX3	5455	POU3F3	54540	FAM193B	4883	NPR3	51659	GINS2	4857	NOVA1	51084	CRYL1	51056	LAP3	2580	GAK
5126	PCSK2	51105	PHF20L1	54522	ANKRD16	54799	MBTD1	54790	TET2	5045	FURIN	5230	PGK1	51187	RSL24D1	51090	PLLP	51067	YARS2	25831	HECTD1
51308	REEP2	5116	PCNT	54587	MXRA8	54820	NDE1	54799	MBTD1	50848	F11R	5245	PHB	51293	CD320	51201	ZDHHC2	51119	SBDS	25836	NIPBL
51347	TAOK3	51366	UBR5	54675	CRLS1	54873	PALMD	54874	FNBP1L	5099	PCDH7	5300	PIN1	51295	ECSIT	51277	DNAJC27	51142	CHCHD2	25839	COG4
5138	PDE2A	51747	LUC7L3	54819	ZCCHC10	54908	SPDL1	54898	ELOVL2	51136	RNFT1	533	ATP6V0B	51506	UFC1	51367	POP5	51367	POP5	25898	RCHY1
51412	ACTL6B	51773	RSF1	54865	GPATCH4	55023	PHIP	54923	LIME1	5125	PCSK5	5425	POLD2	51529	ANAPC11	51478	HSD17B7	51527	GSKIP	25909	AHCTF1
51530	ZC3HC1	5214	PFKP	54923	LIME1	55079	FEZF2	55015	PRPF39	51312	SLC25A37	5432	POLR2C	51654	CDK5RAP1	51517	NCKIPSD	51642	MRPL48	25923	ATL3
51616	TAF9B	5339	PLEC	55015	PRPF39	55110	MAGOHB	55125	CEP192	51380	CSAD	54344	DPM3	51659	GINS2	51555	PEX5L	51655	RASD1	259230	SGMS1
534	ATP6V1G2	53616	ADAM22	55023	PHIP	55143	CDCA8	55327	LIN7C	51426	POLK	54460	MRPS21	53358	SHC3	51635	DHRS7	5270	SERPINE2	25948	KBTBD2
54329	GPR85	5411	PNN	55033	FKBP14	55247	NEIL3	55502	HES6	51429	SNX9	54749	EPDR1	53822	FXYD7	51655	RASD1	5272	SERPINB9	25957	PNISR
54413	NLGN3	54464	XRN1	55082	ARGLU1	55297	CCDC91	55506	H2AFY2	51478	HSD17B7	54921	CHTF8	53834	FGFRL1	5270	SERPINE2	53346	TM6SF1	26003	GORASP2
54511	HMGCLL1	5451	POU2F1	55110	MAGOHB	55320	MIS18BP1	55558	PLXNA3	5159	PDGFRB	54965	PIGX	539	ATP5O	53346	TM6SF1	5351	PLOD1	26054	SENP6
547	KIF1A	5452	POU2F2	55112	WDR60	5547	PRCP	55565	ZNF821	51654	CDK5RAP1	54968	TMEM70	5433	POLR2D	5338	PLD2	5354	PLP1	26058	GIGYF2
54806	AHI1	54522	ANKRD16	55119	PRPF38B	55635	DEPDC1	55627	SMPD4	5179	PENK	54977	SLC25A38	5434	POLR2E	53829	P2RY13	5412	UBL3	26065	LSM14A
55041	PLEKHB2	54542	RC3H2	55131	RBM28	55789	DEPDC1B	55632	G2E3	5269	SERPINB6	5499	PPP1CA	54344	DPM3	53834	FGFRL1	54209	TREM2	26097	CHTOP
55079	FEZF2	546	ATRX	55139	ANKZF1	55835	CENPJ	55657	ZNF692	5270	SERPINE2	55004	LAMTOR1	54756	IL17RD	54491	FAM105A	54344	DPM3	26122	EPC2
55084	SOBP	54790	TET2	55198	APPL2	55839	CENPN	55691	FRMD4A	5324	PLAG1	55017	C14orf119	54958	TMEM160	54795	TRPM4	54443	ANLN	26135	SERBP1
55101	ATP5SL	54832	VPS13C	55229	PANK4	55872	PBK	55715	DOK4	5333	PLCD1	55038	CDCA4	54977	SLC25A38	54857	GDPD2	5445	PON2	2618	GART
55142	HAUS2	54891	INO80D	55236	UBA6	5608	MAP2K6	55727	BTBD7	5360	PLTP	553115	PEF1	55004	LAMTOR1	54869	EPS8L1	54453	RIN2	26224	FBXL3
5521	PPP2R2B	55015	PRPF39	55257	MRGBP	56271	BEX4	5585	PKN1	5376	PMP22	55317	AP5S1	55066	PDPR	54958	TMEM160	54498	SMOX	26235	FBXL4
55297	CCDC91	55023	PHIP	5547	PRCP	56992	KIF15	5598	MAPK7	538	ATP7A	55588	MED29	5511	PPP1R8	5507	PPP1R3C	54677	CROT	2631	GBAS
55351	STK32B	55112	WDR60	55599	RNPC3	57224	NHSL1	5648	MASP1	53917	RAB24	55723	ASF1B	55168	MRPS18A	55184	DZANK1	54704	PDP1	26520	TIMM9
55450	CAMK2N1	55184	DZANK1	55609	ZNF280C	57333	RCN3	5649	RELN	54344	DPM3	55760	DHX32	55184	DZANK1	55220	KLHDC8A	54820	NDE1	2665	GDI2
55530	SVOP	55187	VPS13D	55646	LYAR	57405	SPC25	56896	DPYSL5	54453	RIN2	55954	ZMAT5	55220	KLHDC8A	55617	TASP1	54869	EPS8L1	267	AMFR
55531	ELMOD1	55607	PPP1R9A	55657	ZNF692	5806	PTX3	571	BACH1	54480	CHPF2	55967	NDUFA12	55651	NHP2	5565	PRKAB2	54880	BCOR	26973	CHORDC1
55638	SYBU	55636	CHD7	55680	RUFY2	58158	NEUROD4	57451	TENM2	54522	ANKRD16	5604	MAP2K1	55665	URGCP	55650	PIGV	549	AUH	26995	TRUB2
5575	PRKAR1B	55680	RUFY2	55687	TRMU	5832	ALDH18A1	57482	KIAA1211	54537	FAM35A	56270	WDR45B	55742	PARVA	55851	PSENEN	54968	TMEM70	27086	FOXP1
5579	PRKCB	55704	CCDC88A	55749	CCAR1	58499	ZNF462	57494	RIMKLB	54587	MXRA8	5681	PSKH1	55776	SAYSD1	5604	MAP2K1	5507	PPP1R3C	27101	CACYBP
55800	SCN3B	55729	ATF7IP	55757	UGGT2	58500	ZNF250	57507	ZNF608	54751	FBLIM1	5686	PSMA5	55898	UNC45A	56265	CPXM1	55093	WDYHV1	27107	ZBTB11
55904	KMT2E	55755	CDK5RAP2	55974	SLC50A1	5939	RBMS2	57522	SRGAP1	54784	ALKBH4	5689	PSMB1	55959	SULF2	5641	LGMN	55256	ADI1	27131	SNX5
5648	MASP1	55757	UGGT2	56271	BEX4	5947	RBP1	57523	NYNRIN	54923	LIME1	5691	PSMB3	5691	PSMB3	5662	PSD	55466	DNAJA4	27249	MMADHC
5649	RELN	55814	BDP1	567	B2M	60686	C14orf93	5754	PTK7	55198	APPL2	57030	SLC17A7	5693	PSMB5	5699	PSMB10	55664	CDC37L1	27430	MAT2B
5662	PSD	55870	ASH1L	56978	PRDM8	6093	ROCK1	5757	PTMA	55285	RBM41	5711	PSMD5	56934	CA10	57030	SLC17A7	55856	ACOT13	2783	GNB2
56853	CELF4	56252	YLPM1	57018	CCNL1	6137	RPL13	57574	MARCH4	55454	CSGALNACT2	57798	GATAD1	56953	NT5M	57117	INTS12	55863	TMEM126B	283237	TTC9C
56899	ANKS1B	57187	THOC2	57396	CLK4	6194	RPS6	57593	EBF4	55599	RNPC3	57799	RAB40C	56954	NIT2	57125	PLXDC1	55916	NXT2	284058	KANSL1
56975	FAM20C	57282	SLC4A10	57616	TSHZ3	6233	RPS27A	57600	FNIP2	55616	ASAP3	57827	C6orf47	5699	PSMB10	57146	TMEM159	5593	PRKG2	284273	ZADH2
56978	PRDM8	57448	BIRC6	5771	PTPN2	63973	NEUROG2	57611	ISLR2	55707	NECAP2	5810	RAD1	5727	PTCH1	57180	ACTR3B	55973	BCAP29	285753	CEP57L1
57106	NAT14	57451	TENM2	5789	PTPRD	63974	NEUROD6	57670	KIAA1549	55721	IQCC	5831	PYCR1	57468	SLC12A5	57462	KIAA1161	5611	DNAJC3	28956	LAMTOR2
57144	PAK7	57522	SRGAP1	5796	PTPRK	64151	NCAPG	57701	NCKAP5L	55742	PARVA	58505	OSTC	57586	SYT13	57468	SLC12A5	5654	HTRA1	28973	MRPS18B
57180	ACTR3B	57551	TAOK1	58487	CREBZF	6431	SRSF6	57715	SEMA4G	55757	UGGT2	5928	RBBP4	57683	ZDBF2	57520	HECW2	56648	EIF5A2	28989	NTMT1
57213	SPRYD7	57597	BAHCC1	58517	RBM25	64344	HIF3A	58499	ZNF462	55959	SULF2	593	BCKDHA	57799	RAB40C	57586	SYT13	56994	CHPT1	29035	C16orf72
57338	JPH3	57616	TSHZ3	58527	ABRACL	64431	ACTR6	5881	RAC3	56034	PDGFC	5984	RFC4	5798	PTPRN	58473	PLEKHB1	57084	SLC17A6	29068	ZBTB44
57348	TTYH1	57654	UVSSA	5863	RGL2	64641	EBF2	5980	REV3L	56265	CPXM1	5990	RFX2	5875	RABGGTA	5875	RABGGTA	57104	PNPLA2	29072	SETD2
57406	ABHD6	57683	ZDBF2	5871	MAP4K2	646851	FAM227A	5991	RFX3	56925	LXN	6119	RPA3	5881	RAC3	5924	RASGRF2	5716	PSMD10	2909	ARHGAP35
57447	NDRG2	5789	PTPRD	59338	PLEKHA1	64785	GINS3	60312	AFAP1	56927	GPR108	6122	RPL3	5924	RASGRF2	59339	PLEKHA2	5723	PSPH	29101	SSU72
57468	SLC12A5	58499	ZNF462	604	BCL6	6480	ST6GAL1	60468	BACH2	56944	OLFML3	6128	RPL6	6001	RGS10	5992	RFX4	57447	NDRG2	29117	BRD7
57540	PTCHD2	58508	KMT2C	60487	TRMT11	6491	STIL	60509	AGBL5	56999	ADAMTS9	6137	RPL13	6014	RIT2	6001	RGS10	57464	STRIP2	2935	GSPT1
57611	ISLR2	58517	RBM25	60558	GUF1	64943	NT5DC2	60672	MIIP	57007	ACKR3	6142	RPL18A	60491	NIF3L1	6277	S100A6	57480	PLEKHG1	2954	GSTZ1
5763	PTMS	59269	HIVEP3	60672	MIIP	64983	MRPL32	6091	ROBO1	57333	RCN3	6159	RPL29	60677	CELF6	6284	S100A13	57506	MAVS	2960	GTF2E1
57633	LRRN1	59338	PLEKHA1	6093	ROCK1	65117	RSRC2	619279	ZNF704	5784	PTPN14	6168	RPL37A	6168	RPL37A	6285	S100B	58473	PLEKHB1	2969	GTF2I
57699	CPNE5	5980	REV3L	6096	RORB	6596	HLTF	6199	RPS6KB2	58487	CREBZF	6182	MRPL12	6171	RPL41	63827	BCAN	5860	QDPR	2972	BRF1
57863	CADM3	6096	RORB	6199	RPS6KB2	65979	PHACTR4	6263	RYR3	58527	ABRACL	6205	RPS11	6175	RPLP0	63939	FAM217B	5997	RGS2	2976	GTF3C2
5800	PTPRO	619279	ZNF704	6224	RPS20	6605	SMARCE1	6328	SCN3A	587	BCAT2	6224	RPS20	6208	RPS14	64130	LIN7B	6001	RGS10	29803	REPIN1
586	BCAT1	6238	RRBP1	6251	RSU1	6659	SOX4	63974	NEUROD6	59338	PLEKHA1	63874	ABHD4	6209	RPS15	64131	XYLT1	6004	RGS16	29901	SAC3D1
5864	RAB3A	6263	RYR3	6342	SCP2	6664	SOX11	64067	NPAS3	6049	RNF6	63950	DMRTA2	6222	RPS18	641649	TMEM91	6009	RHEB	29904	EEF2K
5865	RAB3B	6310	ATXN1	63974	NEUROD6	672	BRCA1	6422	SFRP1	60681	FKBP10	64410	KLHL25	6223	RPS19	64218	SEMA4A	6014	RIT2	29959	NRBP1
60	ACTB	6314	ATXN7	64061	TSPYL2	6772	STAT1	64221	ROBO3	6238	RRBP1	64419	MTMR14	637	BID	64374	SIL1	6038	RNASE4	3069	HDLBP
60559	SPCS3	6326	SCN2A	64151	NCAPG	6879	TAF7	64780	MICAL1	6242	RTKN	6470	SHMT1	63929	XPNPEP3	64805	P2RY12	6227	RPS21	3093	UBE2K
60677	CELF6	6328	SCN3A	6426	SRSF1	6900	CNTN2	649	BMP1	6256	RXRA	64834	ELOVL1	63939	FAM217B	65009	NDRG4	6277	S100A6	3150	HMGN1
6252	RTN1	6334	SCN8A	6430	SRSF5	699	BUB1	64919	BCL11B	6281	S100A10	65057	ACD	64131	XYLT1	65010	SLC26A6	6284	S100A13	3151	HMGN2
6299	SALL1	64061	TSPYL2	6432	SRSF7	7022	TFAP2C	6503	SLA	6282	S100A11	6608	SMO	641649	TMEM91	6507	SLC1A3	6285	S100B	3181	HNRNPA2B1
63035	BCORL1	6430	SRSF5	6477	SIAH1	7035	TFPI	65108	MARCKSL1	6383	SDC2	6609	SMPD1	64207	IRF2BPL	6511	SLC1A6	6303	SAT1	3187	HNRNPH1
63908	NAPB	64421	DCLRE1C	6510	SLC1A5	7046	TGFBR1	653319	KIAA0895L	6387	CXCL12	6618	SNAPC2	64374	SIL1	6515	SLC2A3	6388	SDF2	3189	HNRNPH3
63934	ZNF667	646851	FAM227A	65109	UPF3B	7072	TIA1	6567	SLC16A2	6405	SEMA3F	6631	SNRPC	644353	ZCCHC18	6528	SLC5A5	6414	SEPP1	3190	HNRNPK
64101	LRRC4	65059	RAPH1	65117	RSRC2	7153	TOP2A	65998	C11orf95	6414	SEPP1	6635	SNRPE	64689	GORASP1	6566	SLC16A1	64236	PDLIM2	3191	HNRNPL
6422	SFRP1	65065	NBEAL1	6574	SLC20A1	7157	TP53	6621	SNAPC4	6464	SHC1	6837	MED22	64766	S100PBP	658	BMPR1B	643155	SMIM15	3192	HNRNPU
644353	ZCCHC18	65109	UPF3B	6596	HLTF	7171	TPM4	6659	SOX4	64759	TNS3	6881	TAF10	64928	MRPL14	6696	SPP1	64359	NXN	3267	AGFG1
6447	SCG5	65125	WNK1	65981	CAPRIN2	7272	TTK	6664	SOX11	64834	ELOVL1	6948	TCN2	6511	SLC1A6	6774	STAT3	644	BLVRA	329	BIRC2
6456	SH3GL2	65250	C5orf42	6621	SNAPC4	7422	VEGFA	6666	SOX12	64863	METTL4	7071	KLF10	65220	NADK	6804	STX1A	6446	SGK1	3326	HSP90AB1
65055	REEP1	6546	SLC8A1	6741	SSB	7431	VIM	7026	NR2F2	6515	SLC2A3	7186	TRAF2	65999	LRRC61	6810	STX4	64759	TNS3	3337	DNAJB1
6585	SLIT1	6565	SLC15A2	6742	SSBP1	7507	XPA	7059	THBS3	6521	SLC4A1	7205	TRIP6	66005	CHID1	6857	SYT1	64928	MRPL14	339983	NAT8L
6616	SNAP25	6571	SLC18A2	677	ZFP36L1	7569	ZNF182	7072	TIA1	655	BMP7	7419	VDAC3	66036	MTMR9	6988	TCTA	64979	MRPL36	345757	FAM174A
6658	SOX3	65986	ZBTB10	6840	SVIL	7584	ZNF35	7105	TSPAN6	65997	RASL11B	746	TMEM258	6628	SNRPB	7070	THY1	6513	SLC2A1	3480	IGF1R
6662	SOX9	6625	SNRNP70	6856	SYPL1	7620	ZNF69	7410	VAV2	6678	SPARC	7477	WNT7B	6652	SORD	7071	KLF10	6642	SNX1	359948	IRF2BP2
6695	SPOCK1	6651	SON	6901	TAZ	7764	ZNF217	7552	ZNF711	678	ZFP36L2	7494	XBP1	6658	SOX3	7077	TIMP2	6678	SPARC	3646	EIF3E
6750	SST	667	DST	6905	TBCE	79075	DSCC1	7804	LRP8	6810	STX4	7516	XRCC2	6934	TCF7L2	71	ACTG1	6696	SPP1	3660	IRF2
6752	SSTR2	6709	SPTAN1	6940	ZNF354A	79101	TAF1D	7846	TUBA1A	6840	SVIL	7760	ZNF213	7182	NR2C2	7106	TSPAN4	670	BPHL	3725	JUN
6812	STXBP1	6711	SPTBN1	7035	TFPI	79228	THOC6	7903	ST8SIA4	6876	TAGLN	780	DDR1	7186	TRAF2	7111	TMOD1	6948	TCN2	3727	JUND
6853	SYN1	673	BRAF	7037	TFRC	79598	CEP97	79047	KCTD15	6894	TARBP1	7832	BTG2	7263	TST	714	C1QC	7071	KLF10	374291	NDUFS7
6855	SYP	675	BRCA2	7059	THBS3	79665	DHX40	79633	FAT4	6948	TCN2	7873	MANF	7485	WRB	7305	TYROBP	712	C1QA	376940	ZC3H6
6857	SYT1	7175	TPR	7072	TIA1	79674	VEPH1	79684	MSANTD2	7035	TFPI	78995	C17orf53	7545	ZIC1	741	ZNHIT2	713	C1QB	379	ARL4D
6861	SYT5	729956	SHISA7	7073	TIAL1	79738	BBS10	79813	EHMT1	7041	TGFB1I1	79006	METRN	79006	METRN	7464	CORO2A	7132	TNFRSF1A	3837	KPNB1
7275	TUB	7402	UTRN	7157	TP53	79801	SHCBP1	79827	CLMP	7057	THBS1	79022	TMEM106C	79020	C7orf25	7466	WFS1	714	C1QC	3842	TNPO1
727800	RNF208	773	CACNA1A	7169	TPM2	79811	SLTM	79832	QSER1	7078	TIMP3	79033	ERI3	79147	FKRP	7518	XRCC4	7184	HSP90B1	390916	NUDT19
7280	TUBB2A	774	CACNA1B	7205	TRIP6	79817	MOB3B	7994	KAT6A	7094	TLN1	79034	C7orf26	794	CALB2	79006	METRN	7263	TST	4040	LRP6
728215	FAM155A	7741	ZSCAN26	729288	ZNF286B	79845	RNF122	79969	ATAT1	7132	TNFRSF1A	79038	ZFYVE21	79575	ABHD8	79095	C9orf16	7305	TYROBP	415116	PIM3
7345	UCHL1	7745	ZKSCAN8	7341	SUMO1	79848	CSPP1	80179	MYO19	7168	TPM1	79042	TSEN34	79594	MUL1	79155	TNIP2	7351	UCP2	4216	MAP3K4
744	MPPED2	775	CACNA1C	7514	XPO1	79886	CAAP1	8019	BRD3	7169	TPM2	79086	SMIM7	79618	HMBOX1	79176	FBXL15	7430	EZR	4297	KMT2A
758	MPPED1	777	CACNA1E	79101	TAF1D	79979	TRMT2B	80279	CDK5RAP3	7297	TYK2	79095	C9orf16	79637	ARMC7	7957	EPM2A	7733	ZNF180	4335	MNT
782	CACNB1	781	CACNA2D1	79145	CHCHD7	800	CALD1	80312	TET1	7402	UTRN	79144	PPDPF	79759	ZNF668	79605	PGBD5	7857	SCG2	4665	NAB2
7857	SCG2	79598	CEP97	79366	HMGN5	80095	ZNF606	80321	CEP70	7414	VCL	79176	FBXL15	79982	DNAJB14	79791	FBXO31	7873	MANF	468	ATF4
78986	DUSP26	79603	CERS4	79441	HAUS3	80321	CEP70	80339	PNPLA3	7473	WNT3	79575	ABHD8	80023	NRSN2	79794	C12orf49	79038	ZFYVE21	4719	NDUFS1
78997	GDAP1L1	79632	FAM184A	79762	C1orf115	80775	TMEM177	80381	CD276	7518	XRCC4	79650	USB1	80028	FBXL18	79831	KDM8	79133	NDUFAF5	4756	NEO1
79004	CUEDC2	79633	FAT4	79811	SLTM	81029	WNT5B	80816	ASXL3	7837	PXDN	79693	YRDC	80150	ASRGL1	79870	BAALC	79174	CRELD2	4774	NFIA
79020	C7orf25	79659	DYNC2H1	80179	MYO19	8148	TAF15	80818	ZNF436	79634	SCRN3	79714	CCDC51	80746	TSEN2	79982	DNAJB14	794	CALB2	4799	NFX1
79085	SLC25A23	79673	ZNF329	80184	CEP290	81930	KIF18A	8085	KMT2D	79644	SRD5A3	79731	NARS2	80757	TMEM121	80150	ASRGL1	79622	SNRNP25	4800	NFYA
794	CALB2	79776	ZFHX4	80321	CEP70	8241	RBM10	81706	PPP1R14C	79660	PPP1R3B	79774	GRTP1	80776	B9D2	80714	PBX4	79634	SCRN3	4802	NFYC
80007	C10orf88	79800	CARF	80325	ABTB1	8317	CDC7	81794	ADAMTS10	79674	VEPH1	80776	B9D2	81577	GFOD2	80896	NPL	79870	BAALC	483	ATP1B3
80023	NRSN2	79834	PEAK1	80781	COL18A1	8320	EOMES	8317	CDC7	79971	WLS	81532	MOB2	81926	ABHD17A	814	CAMK4	80150	ASRGL1	4848	CNOT2
80128	TRIM46	79848	CSPP1	8148	TAF15	83461	CDCA3	835	CASP2	800	CALD1	81577	GFOD2	8209	C21orf33	83549	UCK1	80219	COQ10B	4849	CNOT3
80150	ASRGL1	80012	PHC3	81669	CCNL2	83540	NUF2	83543	AIF1L	80114	BICC1	81610	FAM83D	8270	LAGE3	83640	FAM103A1	80243	PREX2	4899	NRF1
80228	ORAI2	80243	PREX2	81858	SHARPIN	83759	RBM4B	836	CASP3	80781	COL18A1	81618	ITM2C	8314	BAP1	83891	SNX25	80723	SLC35G2	4931	NVL
80725	SRCIN1	80312	TET1	81892	SLIRP	83937	RASSF4	83641	FAM107B	81558	FAM117A	81892	SLIRP	83259	PCDH11Y	84223	IQCG	8153	RND2	4976	OPA1
8237	USP11	80315	CPEB4	8243	SMC1A	84108	PCGF6	83787	ARMC10	81794	ADAMTS10	81926	ABHD17A	83543	AIF1L	84239	ATP13A4	81617	CAB39L	498	ATP5A1
83608	C18orf21	80816	ASXL3	8317	CDC7	84318	CCDC77	84132	USP42	831	CAST	83463	MXD3	84065	TMEM222	84253	GARNL3	81628	TSC22D4	5093	PCBP1
84262	PSMG3	8085	KMT2D	83933	HDAC10	8434	RECK	84206	MEX3B	83690	CRISPLD1	83658	DYNLRB1	84191	FAM96A	84254	CAMKK1	81671	VMP1	51062	ATL1
84333	PCGF5	81034	SLC25A32	8405	SPOP	84455	EFCAB7	8427	ZNF282	83857	TMTC1	83786	FRMD8	84258	SYT3	84264	HAGHL	83604	TMEM47	51078	THAP4
84457	PHYHIPL	8148	TAF15	84324	SARNP	8463	TEAD2	8446	DUSP11	83871	RAB34	83930	STARD3NL	84269	CHCHD5	84279	PRADC1	84064	HDHD2	5108	PCM1
84501	SPIRE2	81796	SLCO5A1	8434	RECK	84722	PSRC1	84530	SRRM4	83999	KREMEN1	83941	TM2D1	84275	SLC25A33	84302	TMEM246	84263	HSDL2	51108	METTL9
84502	JPH4	8295	TRRAP	8446	DUSP11	84759	PCGF1	8462	KLF11	84061	MAGT1	84148	KAT8	84299	MIEN1	84418	CYSTM1	84272	YIPF4	51111	SUV420H1
84867	PTPN5	84162	KIAA1109	84524	ZC3H8	84870	RSPO3	84668	FAM126A	84168	ANTXR1	84232	MAF1	84302	TMEM246	84679	SLC9A7	84275	SLC25A33	51157	ZNF580
84878	ZBTB45	84181	CHD6	8473	OGT	84904	ARHGEF39	84678	KDM2B	84236	RHBDD1	84548	TMEM185A	84303	CHCHD6	84898	PLXDC2	84293	FAM213A	51227	PIGP
8490	RGS5	84186	ZCCHC7	84826	SFT2D3	857	CAV1	84787	SUV420H2	84264	HAGHL	8459	TPST2	84334	APOPT1	84926	SPRYD3	84417	C2orf40	51272	BET1L
84966	IGSF21	84376	HOOK3	84865	CCDC142	871	SERPINH1	84865	CCDC142	8434	RECK	8463	TEAD2	84337	ELOF1	8514	KCNAB2	84418	CYSTM1	51317	PHF21A
8499	PPFIA2	8473	OGT	84896	ATAD1	8788	DLK1	85440	DOCK7	84617	TUBB6	84861	KLHL22	84522	JAGN1	85315	PAQR8	84525	HOPX	51322	WAC
8535	CBX4	8476	CDC42BPA	84909	C9orf3	8829	NRP1	85460	ZNF518B	84619	ZGPAT	85025	TMEM60	84557	MAP1LC3A	8534	CHST1	84706	GPT2	51341	ZBTB7A
85352	KIAA1644	8479	HIRIP3	8556	CDC14A	890	CCNA2	862	RUNX1T1	84695	LOXL3	8574	AKR7A2	8458	TTF2	8622	PDE8B	84879	MFSD2A	51433	ANAPC5
85508	SCRT2	85444	LRRCC1	857	CAV1	891	CCNB1	8642	DCHS1	84898	PLXDC2	8668	EIF3I	84630	TTBK1	8745	ADAM23	84987	COX14	51441	YTHDF2
8601	RGS20	85446	ZFHX2	8661	EIF3A	8971	H1FX	8692	HYAL2	84909	C9orf3	8692	HYAL2	84679	SLC9A7	8863	PER3	85315	PAQR8	51455	REV1
8618	CADPS	85463	ZC3H12C	87178	PNPT1	89839	ARHGAP11B	8786	RGS11	84928	TMEM209	8738	CRADD	84928	TMEM209	8999	CDKL2	8572	PDLIM4	51506	UFC1
8788	DLK1	85464	SSH2	889	KRIT1	901	CCNG2	8828	NRP2	84952	CGNL1	8818	DPM2	8514	KCNAB2	90050	FAM181A	8788	DLK1	51514	DTL
8905	AP1S2	8661	EIF3A	8906	AP1G2	90102	PHLDB2	8835	SOCS2	8519	IFITM1	891	CCNB1	8534	CHST1	9054	NFS1	8801	SUCLG2	51593	SRRT
89927	C16orf45	8672	EIF4G3	892	CCNC	90417	KNSTRN	894	CCND2	85301	COL27A1	8915	BCL10	85395	FAM207A	90865	IL33	8802	SUCLG1	51621	KLF13
91	ACVR1B	8675	STX16	8939	FUBP3	9055	PRC1	89796	NAV1	871	SERPINH1	896	CCND3	8575	PRKRA	91409	CCDC74B	8804	CREG1	51646	YPEL5
9108	MTMR7	8906	AP1G2	90799	CEP95	9133	CCNB2	90060	CCDC120	8826	IQGAP1	8992	ATP6V0E1	8629	JRK	9145	SYNGR1	8836	GGH	51747	LUC7L3
9118	INA	8924	HERC2	9126	SMC3	9349	RPL23	90379	DCAF15	896	CCND3	90507	SCRN2	8788	DLK1	91947	ARRDC4	899	CCNF	51780	KDM3B
9143	SYNGR3	8925	HERC1	91408	BTF3L4	93594	TBC1D31	90668	LRRC16B	90102	PHLDB2	90522	YIF1B	89891	WDR34	92170	MTG1	90411	MCFD2	5187	PER1
9145	SYNGR1	8927	BSN	91433	RCCD1	94241	TP53INP1	91404	SESTD1	90799	CEP95	9094	UNC119	9049	AIP	92211	CDHR1	90701	SEC11C	5189	PEX1
91608	RASL10B	89796	NAV1	9196	KCNAB3	9447	AIM2	91526	ANKRD44	91010	FMNL3	9212	AURKB	90637	ZFAND2A	92935	MARS2	90865	IL33	5209	PFKFB3
9213	XPR1	89797	NAV2	9204	ZMYM6	9493	KIF23	91584	PLXNA4	9124	PDLIM1	92305	TMEM129	90956	ADCK2	9308	CD83	91574	C12orf65	5217	PFN2
92691	TMEM169	8997	KALRN	9246	UBE2L6	9541	CIR1	92211	CDHR1	91433	RCCD1	9261	MAPKAPK2	91612	CHURC1	93210	PGAP3	92667	MGME1	523	ATP6V1A
9275	BCL7B	91584	PLXNA4	9324	HMGN3	9620	CELSR1	92799	SHKBP1	92126	DSEL	92667	MGME1	91978	TPGS1	9362	CPNE6	9308	CD83	5315	PKM
93145	OLFM2	9204	ZMYM6	93487	MAPK1IP1L	9687	GREB1	92979	MARCH9	92689	FAM114A1	9296	ATP6V1F	92017	SNX29	93624	TADA2B	9326	ZNHIT3	53343	NUDT9
9338	TCEAL1	9321	TRIP11	93663	ARHGAP18	9700	ESPL1	9315	NREP	9294	S1PR2	9326	ZNHIT3	92211	CDHR1	94097	SFXN5	9368	SLC9A3R1	53354	PANK1
9363	RAB33A	9369	NRXN3	9406	ZRANB2	9768	KIAA0101	9448	MAP4K4	93210	PGAP3	94015	TTYH2	92399	MRRF	9435	CHST2	9388	LIPG	53371	NUP54
9369	NRXN3	9378	NRXN1	94104	PAXBP1	9786	KIAA0586	9545	RAB3D	9452	ITM2A	94101	ORMDL1	92675	DTD1	9568	GABBR2	9412	MED21	53407	STX18
9379	NRXN2	9481	SLC25A27	9584	RBM39	9787	DLGAP5	9618	TRAF4	953	ENTPD1	9412	MED21	9296	ATP6V1F	9583	ENTPD4	9450	LY86	53981	CPSF2
9388	LIPG	9612	NCOR2	9585	KIF20B	983	CDK1	9620	CELSR1	9541	CIR1	9442	MED27	9308	CD83	9600	PITPNM1	9547	CXCL14	54108	CHRAC1
94081	SFXN1	9667	SAFB2	9667	SAFB2	9833	MELK	9788	MTSS1	9547	CXCL14	9546	APBA3	9326	ZNHIT3	9609	RAB36	9551	ATP5J2	5412	UBL3
94097	SFXN5	9699	RIMS2	9669	EIF5B	9839	ZEB2	9859	CEP170	9563	H6PD	9592	IER2	94239	H2AFV	968	CD68	9556	C14orf2	54148	MRPL39
9699	RIMS2	9732	DOCK4	9694	EMC2	991	CDC20	9918	NCAPD2	9590	AKAP12	967	CD63	9479	MAPK8IP1	9723	SEMA3E	9588	PRDX6	54433	GAR1
9746	CLSTN3	9748	SLK	9790	BMS1	9918	NCAPD2	9925	ZBTB5	9687	GREB1	9684	LRRC14	9526	MPDU1	9746	CLSTN3	9604	RNF14	54537	FAM35A
9805	SCRN1	9814	SFI1	9839	ZEB2	9928	KIF14	994	CDC25B	9828	ARHGEF17	977	CD151	9745	ZNF536	9783	RIMS3	9616	RNF7	54665	RSBN1
9900	SV2A	9857	CEP350	9968	MED12	995	CDC25C	9960	USP3	9865	TRIL	983	CDK1	9750	FAM65B	9796	PHYHIP	967	CD63	54726	OTUD4
9957	HS3ST1	9879	DDX46	9984	THOC1	9985	REC8	9968	MED12	9945	GFPT2	9836	LCMT2	9783	RIMS3	9865	TRIL	97	ACYP1	54741	LEPROT
9985	REC8	9968	MED12	9987	HNRNPDL	9987	HNRNPDL	9987	HNRNPDL	9991	PTBP3	9929	JOSD1	9865	TRIL	9923	ZBTB40	98	ACYP2	54765	TRIM44
																				54778	RNF111
																				5479	PPIB
																				54812	AFTPH
																				54870	QRICH1
																				54891	INO80D
																				54893	MTMR10
																				54904	WHSC1L1
																				54949	SDHAF2
																				5500	PPP1CB
																				55004	LAMTOR1
																				55023	PHIP
																				55031	USP47
																				55032	SLC35A5
																				55111	PLEKHJ1
																				55145	THAP1
																				55170	PRMT6
																				5520	PPP2R2A
																				55229	PANK4
																				552889	ATXN7L3B
																				55313	CPPED1
																				55326	AGPAT5
																				55432	YOD1
																				55527	FEM1A
																				55599	RNPC3
																				55629	PNRC2
																				55650	PIGV
																				55663	ZNF446
																				55677	IWS1
																				55684	RABL6
																				55704	CCDC88A
																				55726	ASUN
																				5573	PRKAR1A
																				55745	AP5M1
																				55750	AGK
																				55759	WDR12
																				55795	PCID2
																				5581	PRKCE
																				55818	KDM3A
																				55827	DCAF6
																				55832	CAND1
																				55837	EAPP
																				55893	ZNF395
																				5594	MAPK1
																				55958	KLHL9
																				5597	MAPK6
																				5607	MAP2K5
																				5609	MAP2K7
																				5660	PSAP
																				5688	PSMA7
																				56888	KCMF1
																				56897	WRNIP1
																				56926	NCLN
																				56929	FEM1C
																				56947	MFF
																				56970	ATXN7L3
																				56980	PRDM10
																				57003	CCDC47
																				57018	CCNL1
																				57129	MRPL47
																				57147	SCYL3
																				57157	PHTF2
																				5721	PSME2
																				5723	PSPH
																				5725	PTBP1
																				5728	PTEN
																				57448	BIRC6
																				57492	ARID1B
																				57521	RPTOR
																				57541	ZNF398
																				57542	KLHL42
																				57561	ARRDC3
																				5757	PTMA
																				57592	ZNF687
																				57606	SLAIN2
																				57634	EP400
																				57649	PHF12
																				57678	GPAM
																				58190	CTDSP1
																				583	BBS2
																				58517	RBM25
																				5879	RAC1
																				5887	RAD23B
																				5894	RAF1
																				5921	RASA1
																				5928	RBBP4
																				5962	RDX
																				5976	UPF1
																				598	BCL2L1
																				5989	RFX1
																				60313	GPBP1L1
																				6046	BRD2
																				60686	C14orf93
																				6169	RPL38
																				6181	RPLP2
																				6208	RPS14
																				6210	RPS15A
																				6231	RPS26
																				63826	SRR
																				63894	VIPAS39
																				63925	ZNF335
																				63977	PRDM15
																				64062	RBM26
																				64224	HERPUD2
																				6426	SRSF1
																				6428	SRSF3
																				6432	SRSF7
																				64324	NSD1
																				6433	SFSWAP
																				6434	TRA2B
																				643836	ZFP62
																				64418	TMEM168
																				64766	S100PBP
																				64976	MRPL40
																				65056	GPBP1
																				6605	SMARCE1
																				6625	SNRNP70
																				6628	SNRPB
																				6667	SP1
																				6671	SP4
																				672	BRCA1
																				6760	SS18
																				6767	ST13
																				6786	STIM1
																				6844	VAMP2
																				6938	TCF12
																				7023	TFAP4
																				7071	KLF10
																				7095	SEC62
																				7155	TOP2B
																				7157	TP53
																				7175	TPR
																				7182	NR2C2
																				7326	UBE2G1
																				7329	UBE2I
																				7334	UBE2N
																				7337	UBE3A
																				7343	UBTF
																				7398	USP1
																				7458	EIF4H
																				7514	XPO1
																				7528	YY1
																				7531	YWHAE
																				7534	YWHAZ
																				7555	CNBP
																				7597	ZBTB25
																				7702	ZNF143
																				7733	ZNF180
																				7756	ZNF207
																				7763	ZFAND5
																				7812	CSDE1
																				7844	RNF103
																				79084	WDR77
																				7913	DEK
																				7916	PRRC2A
																				7917	BAG6
																				79176	FBXL15
																				79178	THTPA
																				7922	SLC39A7
																				79269	DCAF10
																				79568	C2orf47
																				7957	EPM2A
																				79595	SAP130
																				79643	CHMP6
																				79676	OGFOD2
																				79718	TBL1XR1
																				79735	TBC1D17
																				79834	PEAK1
																				7993	UBXN8
																				7994	KAT6A
																				80025	PANK2
																				8013	NR4A3
																				80155	NAA15
																				80204	FBXO11
																				80230	RUFY1
																				80254	CEP63
																				8028	MLLT10
																				80315	CPEB4
																				8036	SHOC2
																				8065	CUL5
																				8079	MLF2
																				8087	FXR1
																				81550	TDRD3
																				81556	VWA9
																				81573	ANKRD13C
																				81603	TRIM8
																				81611	ANP32E
																				81669	CCNL2
																				81846	SBF2
																				81858	SHARPIN
																				8187	ZNF239
																				81876	RAB1B
																				81889	FAHD1
																				8289	ARID1A
																				829	CAPZA1
																				8295	TRRAP
																				8313	AXIN2
																				8318	CDC45
																				83607	AMMECR1L
																				83999	KREMEN1
																				84128	WDR75
																				84146	ZNF644
																				84223	IQCG
																				84279	PRADC1
																				84364	ARFGAP2
																				8439	NSMAF
																				8454	CUL1
																				84553	FAXC
																				84629	TNRC18
																				84759	PCGF1
																				84844	PHF5A
																				84905	ZNF341
																				84919	PPP1R15B
																				84922	FIZ1
																				84938	ATG4C
																				8545	CGGBP1
																				85451	UNK
																				86	ACTL6A
																				8664	EIF3D
																				8738	CRADD
																				8890	EIF2B4
																				8899	PRPF4B
																				8976	WASL
																				9031	BAZ1B
																				90326	THAP3
																				9044	BTAF1
																				90806	ANGEL2
																				90933	TRIM41
																				9100	USP10
																				9126	SMC3
																				91369	ANKRD40
																				91408	BTF3L4
																				91452	ACBD5
																				9191	DEDD
																				9197	SLC33A1
																				91978	TPGS1
																				9218	VAPA
																				92181	UBTD2
																				9275	BCL7B
																				92906	HNRNPLL
																				9320	TRIP12
																				9328	GTF3C5
																				9360	PPIG
																				9445	ITM2B
																				9519	TBPL1
																				9526	MPDU1
																				9533	POLR1C
																				9552	SPAG7
																				9575	CLOCK
																				9581	PREPL
																				9589	WTAP
																				9604	RNF14
																				961	CD47
																				9611	NCOR1
																				9667	SAFB2
																				9698	PUM1
																				9702	CEP57
																				9726	ZNF646
																				9736	USP34
																				9739	SETD1A
																				9782	MATR3
																				9794	MAML1
																				9815	GIT2
																				9821	RB1CC1
																				9867	PJA2
																				9873	FCHSD2
																				988	CDC5L
																				989	SEPT7
																				9898	UBAP2L
																				9943	OXSR1
																				9946	CRYZL1
																				9960	USP3
																				9967	THRAP3
																				9975	NR1D2
																				9987	HNRNPDL

## Sheet: Supplemental Table S6B
Supplemental Table S6B. Expression change of CHD8-activated and -repressed target genes during the transition from vRG cells to IPCs at GW10.
Gene ID	Symbol	Average expression (vRG)	Average expression (IPCs)	log2(fold change, IPCs/vRG)	CHD8 target at E14.5
157753	TMEM74	1.08870967741935	47.7541176470588	5.45493394457329
100289635	ZNF605	1.21064516129032	43.0176470588235	5.15108063582482
253559	CADM2	1.35645161290323	47.1056862745098	5.11799173248077
11343	MGLL	1.78354838709677	61.2652941176471	5.10224777862227
8312	AXIN1	1.47483870967742	45.5749019607843	4.94961045962457
85440	DOCK7	2.06	62.6417647058824	4.92640861341184
283149	BCL9L	1.12193548387097	33.0198039215686	4.87926993099716
286410	ATP11C	1.30354838709677	36.9288235294118	4.82423126107004
23140	ZZEF1	1.13161290322581	30.5564705882353	4.75502547774145
6503	SLA	3.32290322580645	84.043137254902	4.66061383493778
221656	KDM1B	1.02967741935484	25.1358823529412	4.60948399213559
221710	SMIM13	1.46612903225807	35.5558823529412	4.60000427452896
317781	DDX51	2.13612903225806	51.1452941176471	4.58153080324996
23143	LRCH1	1.55709677419355	36.7847058823529	4.56217553972304
9841	ZBTB24	1	23.4794117647059	4.55332435960568
9732	DOCK4	1.25225806451613	29.3088235294118	4.54873125103666	activated
1119	CHKA	1.88129032258064	43.4950980392157	4.53105840701642
6948	TCN2	1.55548387096774	35.8952941176471	4.52835937819827	repressed
107	ADCY1	3.15193548387097	70.7460784313726	4.48834026919212
54841	BIVM	2.22548387096774	47.5458823529412	4.41712945372274
25827	FBXL2	1.7841935483871	37.636862745098	4.39880234425489
64207	IRF2BPL	1.79193548387097	37.4821568627451	4.38661337219798
10501	SEMA6B	1	20.8498039215686	4.3819619110412
401647	GOLGA7B	1.30290322580645	26.5609803921569	4.34950656331983
80854	SETD7	1.41387096774193	28.726862745098	4.34467807656225
50651	SLC45A1	1.33096774193548	26.7833333333333	4.33078801234169
4835	NQO2	1.32096774193548	26.5464705882353	4.32885292281471
59269	HIVEP3	1.61870967741936	32.2780392156863	4.31763678195671	activated
1997	ELF1	1.07677419354839	21.198431372549	4.29916986883463
221833	SP8	1	19.3294117647059	4.27272582881237
57662	CAMSAP3	1.16322580645161	22.4362745098039	4.26963005335842
8490	RGS5	1	19.2188235294118	4.26444811985274
53353	LRP1B	1.02967741935484	19.7025490196078	4.25811794942458
114790	STK11IP	1.10612903225807	21.0850980392157	4.25263213583384
9513	FXR2	3.04612903225806	56.2637254901961	4.20715612359302
23303	KIF13B	1.28709677419355	23.196862745098	4.17173726549291
285971	ZNF775	1.40838709677419	24.7888235294118	4.13757398320692
64848	YTHDC2	2.30129032258065	39.7866666666667	4.11177012945414
23510	KCTD2	1.51967741935484	26.2129411764706	4.10844221616214
728621	CCDC30	3.44677419354839	59.373137254902	4.10649165410185
9670	IPO13	2.19193548387097	37.1288235294118	4.08226236181623
23114	NFASC	2.28161290322581	38.3923529411765	4.0726930300173
85446	ZFHX2	1.16322580645161	19.4219607843137	4.06148577199507	activated
64403	CDH24	1.59096774193548	26.4811764705882	4.05699072835698
57595	PDZD4	5.02967741935484	82.5233333333333	4.03626431641955
2743	GLRB	1.60290322580645	25.9545098039216	4.01722600867977
10752	CHL1	1.66870967741936	26.9525490196078	4.01361684021057	activated
55157	DARS2	2.09258064516129	33.4733333333333	3.99965709585523
55330	BLOC1S4	1.35161290322581	21.5360784313725	3.99400163562537
285175	UNC80	1	15.4376470588235	3.94838097474418	activated
5784	PTPN14	1.59354838709677	24.2821568627451	3.92958184325882
344558	SH3RF3	1.22645161290323	18.6637254901961	3.92767477154427
80309	SPHKAP	1	15.1425490196078	3.92053617659196
114794	ELFN2	1.07225806451613	16.1470588235294	3.91254733114611
11178	LZTS1	10.6293548387097	159.792156862745	3.91007065911838
10435	CDC42EP2	1.10612903225807	16.6094117647059	3.90840938614636
727957	MROH1	1.41806451612903	20.8903921568627	3.88084449919746
387104	SOGA3	2.89096774193548	42.5733333333333	3.88032563608331
4097	MAFG	1.80548387096774	26.5658823529412	3.87911719359237
10085	EDIL3	2.61935483870968	38.5217647058824	3.87839037842438
27245	AHDC1	1.88	27.6409803921569	3.87800422026702
403341	ZBTB34	1.41387096774193	20.7013725490196	3.87200405644783
65981	CAPRIN2	1.8558064516129	27.1447058823529	3.87055269226291
26136	TES	1.54709677419355	22.5578431372549	3.86599378302643
90668	LRRC16B	1.25645161290323	18.1905882352941	3.85576517876828
23305	ACSL6	1.13129032258064	16.321568627451	3.85073859778527
5596	MAPK4	1.02967741935484	14.61	3.82669183696803
56172	ANKH	1.48290322580645	21.0374509803922	3.8264635541509
1633	DCK	3.76	53.018431372549	3.81768941958868
284207	METRNL	1.20483870967742	16.9750980392157	3.81650797411229
4320	MMP11	1.23322580645161	17.3660784313726	3.81576311490398
23334	SZT2	1	13.9749019607843	3.8047662569407	activated
56996	SLC12A9	1.53	21.3221568627451	3.80074982461614
2888	GRB14	1	13.8798039215686	3.79491528215665
57786	RBAK	2.66290322580645	36.4823529411765	3.7761268748359
79693	YRDC	1.67870967741935	22.896862745098	3.76972528673413	repressed
1743	DLST	1	13.6180392156863	3.76744708770517
3397	ID1	5.1541935483871	70.1888235294118	3.76742270335087
9935	MAFB	1.54064516129032	20.7772549019608	3.75339853125356
23231	SEL1L3	1.15225806451613	15.5111764705882	3.75077234402031
66008	TRAK2	1.02967741935484	13.8217647058824	3.74667748366213
115827	RAB3C	1.24096774193548	16.4958823529412	3.73256842944434
10500	SEMA6C	1.78064516129032	23.6070588235294	3.72874635242027
23452	ANGPTL2	1.10516129032258	14.4686274509804	3.71059922778801	repressed
339983	NAT8L	2.29741935483871	30.0562745098039	3.70958007225294
4209	MEF2D	2.37064516129032	30.8590196078431	3.70234058699504
27031	NPHP3	4.04096774193548	52.1619607843137	3.69022536194748
51209	RAB9B	1.5658064516129	20.191568627451	3.68877519593211
138241	C9orf85	1.65161290322581	21.2913725490196	3.68832145633211	repressed
6773	STAT2	3.5158064516129	45.3219607843137	3.68828272238347
402665	IGLON5	1.80677419354839	23.231568627451	3.68459845228968
89801	PPP1R3F	1.07225806451613	13.7533333333333	3.68105724878186
23034	SAMD4A	1.19870967741936	15.3511764705882	3.67879503255128
6334	SCN8A	1.53290322580645	19.6096078431373	3.67722215876254	activated
4883	NPR3	1.13161290322581	14.4060784313725	3.67022522652837
57536	KIAA1328	1.10516129032258	13.8862745098039	3.65133075560966
11282	MGAT4B	1.25225806451613	15.6264705882353	3.64138815878331
339745	SPOPL	1	12.3750980392157	3.62936804958507
3912	LAMB1	1.74612903225806	21.4796078431373	3.62073557636874
284439	SLC25A42	1.02967741935484	12.5190196078431	3.60385724487637
54834	GDAP2	1.22258064516129	14.8411764705882	3.60160392194174
653319	KIAA0895L	2.24677419354839	27.0101960784314	3.58757707057841
124637	CYB5D1	1.22645161290323	14.7170588235294	3.58492715871652
1389	CREBL2	1.08870967741935	13.0392156862745	3.5821659017531
9331	B4GALT6	1	11.9739215686275	3.58182382035574
23025	UNC13A	1.60645161290323	19.0749019607843	3.56972621015706	activated
79827	CLMP	1.26612903225806	14.9972549019608	3.56620211032002
1942	EFNA1	3.00322580645161	35.2711764705882	3.55390484028295
155061	ZNF746	1.62451612903226	19.0762745098039	3.55369747587328
57451	TENM2	1.78870967741936	21.0037254901961	3.55365409548822	activated
9532	BAG2	1.65774193548387	19.4350980392157	3.55137304353005
118881	COMTD1	1.65645161290323	19.4096078431373	3.55060300359635
862	RUNX1T1	14.2145161290323	166.502549019608	3.55010736923433
2335	FN1	4.60935483870968	53.9723529411765	3.54958384437535
9860	LRIG2	2.06516129032258	24.0994117647059	3.544671566079
1746	DLX2	1.48870967741935	17.3609803921569	3.54371408304969
6461	SHB	4.82677419354839	56.2233333333333	3.54203774861824
1428	CRYM	1.35741935483871	15.7833333333333	3.53946353072916
283643	C14orf80	1.98354838709677	23.0278431372549	3.5372237935135
9139	CBFA2T2	7.27548387096774	84.3849019607843	3.53586979114641
154661	RUNDC3B	1.55709677419355	18.0525490196078	3.53527204361468
23228	PLCL2	1.93129032258065	22.3358823529412	3.5317262878954
777	CACNA1E	7.3941935483871	85.4113725490196	3.52996346517599	activated
22893	BAHD1	2.1658064516129	24.9490196078431	3.52600689814471
23387	SIK3	2.26870967741935	26.1174509803922	3.52507019220896
10817	FRS3	1.43612903225806	16.5213725490196	3.52407626447697
57578	UNC79	1.64129032258065	18.8056862745098	3.51826659526626
84236	RHBDD1	1.49806451612903	17.0933333333333	3.51226209941889
8728	ADAM19	1.36548387096774	15.4950980392157	3.50432770477618
6752	SSTR2	5.03806451612903	56.3821568627451	3.48429716624827
30011	SH3KBP1	1.77774193548387	19.6998039215686	3.4700634533657
7189	TRAF6	1.07677419354839	11.9170588235294	3.4682405726704
84456	L3MBTL3	1.21	13.3535294117647	3.46414215198848
116843	SLC18B1	1.74612903225806	19.2490196078431	3.46255289058749
30811	HUNK	3.79064516129032	41.6421568627451	3.45752947658979
54862	CC2D1A	1.30903225806452	14.251568627451	3.44454816642908
64744	SMAP2	2.60870967741935	28.26	3.43735316460361
345630	FBLL1	4.43483870967742	47.9005882352941	3.43308983152603
57535	KIAA1324	1.67677419354839	18.0821568627451	3.43080645109952
91433	RCCD1	1.72451612903226	18.5511764705882	3.42724715477128
84867	PTPN5	2.35161290322581	25.2945098039216	3.42710177647801
1008	CDH10	1.15161290322581	12.386862745098	3.42708307452224
440730	TRIM67	1	10.751568627451	3.42647525572068
538	ATP7A	1	10.7464705882353	3.42579101508284
57701	NCKAP5L	1.21516129032258	13.0260784313725	3.4221830955314
78999	LRFN4	5.71161290322581	60.9417647058824	3.41546116600525
114781	BTBD9	1.72806451612903	18.4260784313725	3.41452007338168
10253	SPRY2	1.07225806451613	11.4019607843137	3.41055787289298
84131	CEP78	2.93967741935484	31.24	3.40966469637714
54206	ERRFI1	1.4958064516129	15.8645098039216	3.40680752791283
221914	GPC2	2.89225806451613	30.6603921568627	3.40610796067412
146713	RBFOX3	3.17709677419355	33.6727450980392	3.40580039832147
1739	DLG1	5.31322580645161	55.7249019607843	3.39066224105891
10439	OLFM1	6.73677419354839	70.2519607843137	3.38240864428482
23632	CA14	1	10.3349019607843	3.36945279798443
3306	HSPA2	1.27935483870968	13.2192156862745	3.36914821518092
26205	GMEB2	1.16548387096774	12.0109803921569	3.36535297095449
6484	ST3GAL4	1.60806451612903	16.5007843137255	3.35913740590905
205147	AMER3	1.28870967741935	13.2019607843137	3.35675302497829
8140	SLC7A5	2.7541935483871	28.1535294117647	3.35361394206672
79805	VASH2	2.98387096774194	30.4656862745098	3.35192818383891
387509	GPR153	7.76	79.1409803921569	3.35029637988744
222008	VSTM2A	1	10.1066666666667	3.33723534767521
23329	TBC1D30	1.48774193548387	15.0174509803922	3.33544375205828
115704	EVI5L	1.10516129032258	11.1325490196078	3.33245512333409
1993	ELAVL2	10.7416129032258	108.157647058824	3.33185312953907
9024	BRSK2	8.31387096774194	83.4419607843137	3.32718079737851
145581	LRFN5	1	10.0078431372549	3.32305917690601
6281	S100A10	2.7258064516129	27.2176470588235	3.31978732153229
149175	MANEAL	1.86806451612903	18.6470588235294	3.31933190756091
54769	DIRAS2	1.09322580645161	10.9011764705882	3.31782051468581
57617	VPS18	1.6558064516129	16.4878431372549	3.31579673431989
151556	GPR155	7.35322580645161	73.1833333333333	3.3150659349275
144108	SPTY2D1	1.28516129032258	12.7007843137255	3.30489625372509
6310	ATXN1	1.10516129032258	10.9	3.30199929396716	activated
5566	PRKACA	2.90096774193548	28.6105882352941	3.30194300154134
113000	RPUSD1	1.89096774193548	18.6311764705882	3.30052211887699
2733	GLE1	2.76032258064516	27.1366666666667	3.2973347379508
257397	TAB3	1.10193548387097	10.7266666666667	3.28309016076867
3709	ITPR2	1.31258064516129	12.7727450980392	3.28259065006072
23365	ARHGEF12	4.9158064516129	47.4645098039216	3.27134916440811	activated
158866	ZDHHC15	4.12935483870968	39.608431372549	3.26181926591186
25902	MTHFD1L	1.58290322580645	15.1794117647059	3.26147092323972
55072	RNF31	1.34129032258064	12.8262745098039	3.25740874157973
57168	ASPHD2	1.73709677419355	16.5343137254902	3.25071313177666
83852	SETDB2	1.60870967741935	15.2545098039216	3.24525992775836
79133	NDUFAF5	3.40032258064516	32.1850980392157	3.24264934038601
26207	PITPNC1	1.19483870967742	11.2786274509804	3.23870372188828
4856	NOV	1	9.4021568627451	3.23299175022072
274	BIN1	3.44709677419355	32.258431372549	3.22622257964081
29904	EEF2K	1.6841935483871	15.7603921568627	3.22617358470105
11129	CLASRP	5.24387096774194	49.0325490196078	3.22503567219199
55114	ARHGAP17	3.27258064516129	30.5670588235294	3.22347709252697
2002	ELK1	1.31709677419355	12.3	3.22322505838833
2745	GLRX	10.3896774193548	96.9729411764706	3.22243137948471	repressed
80059	LRRTM4	2.0658064516129	19.258431372549	3.2207132008747
55262	C7orf43	1	9.31725490196079	3.21990496317585
4669	NAGLU	1.35032258064516	12.5798039215686	3.21973343423898
24145	PANX1	1.50258064516129	13.9811764705882	3.21797143476108
55531	ELMOD1	3.63774193548387	33.8149019607843	3.21654406526001
23035	PHLPP2	1.3058064516129	12.1192156862745	3.214283355953
57699	CPNE5	2.30645161290323	21.3658823529412	3.21156196613398
1292	COL6A2	1.10193548387097	10.1996078431372	3.21040201962159
8045	RASSF7	1.83709677419355	16.9982352941176	3.20988544631199
164832	LONRF2	2.74032258064516	25.3356862745098	3.20875327103351
25769	SLC24A2	1.27387096774194	11.7423529411765	3.20443046828021
56475	RPRM	1.49806451612903	13.7641176470588	3.19974046667745
56894	AGPAT3	4.14612903225806	37.9074509803922	3.19264452771787
158586	ZXDB	1	9.13960784313725	3.19213226430975
129285	PPP1R21	2.15161290322581	19.6321568627451	3.18972823040304
80816	ASXL3	1.94967741935484	17.7876470588235	3.18956833412195	activated
7584	ZNF35	2.83258064516129	25.821568627451	3.18838770911507
104	ADARB1	2.94322580645161	26.7958823529412	3.18654118660648
55777	MBD5	1.45741935483871	13.2456862745098	3.18403463301859
284252	KCTD1	2.82387096774194	25.6507843137255	3.18325686562326
54455	FBXO42	3.29967741935484	29.7972549019608	3.17478253049078
151525	WDSUB1	1.22645161290323	10.9837254901961	3.1628052530183
8013	NR4A3	1	8.92627450980392	3.15805817448615
1130	LYST	2.36032258064516	21.0213725490196	3.15480092183157
91782	CHMP7	8.64612903225806	76.9025490196078	3.15290514683545
23108	RAP1GAP2	1	8.85411764705882	3.14634854304282
4094	MAF	1.33548387096774	11.7929411764706	3.14248911607171
55252	ASXL2	2.97612903225806	26.1982352941176	3.13796065348001
26249	KLHL3	1.83193548387097	16.0792156862745	3.13375643492212
164633	CABP7	2.49225806451613	21.8264705882353	3.13055349349326
114787	GPRIN1	2.54548387096774	22.2119607843137	3.12532492458813
57554	LRRC7	1.44548387096774	12.5717647058824	3.12056275980681
2977	GUCY1A2	7.69677419354839	66.9386274509804	3.12051314192575	activated
90987	ZNF251	1.3158064516129	11.4266666666667	3.1183854119857
55343	SLC35C1	1	8.67098039215686	3.11619512227516
92211	CDHR1	1.24	10.7360784313725	3.11405509043218
347730	LRRTM1	1.34935483870968	11.66	3.11122610094334
1282	COL4A1	3.09516129032258	26.7123529411765	3.1094205644416
80709	AKNA	3.67774193548387	31.6917647058824	3.10721584061562
55700	MAP7D1	5.85870967741935	50.2952941176471	3.10176855499357
57795	BRINP2	1.38387096774194	11.8396078431373	3.09683995882058
114788	CSMD3	1.1841935483871	10.0860784313726	3.09038854508744	activated
8451	CUL4A	4.91870967741936	41.8327450980392	3.0882808630245
3487	IGFBP4	1.14451612903226	9.70333333333333	3.08374263948742
65065	NBEAL1	1	8.4756862745098	3.08333018768821	activated
3778	KCNMA1	1	8.46745098039216	3.08192772972063	activated
23283	CSTF2T	2.66516129032258	22.5192156862745	3.07886183137534
1690	COCH	1	8.43549019607843	3.07647190762402
57198	ATP8B2	1.18322580645161	9.97745098039216	3.07594586230321
57610	RANBP10	1.3841935483871	11.5937254901961	3.06622664109677
23232	TBC1D12	1	8.37196078431373	3.06556555378084
100507421	TMEM178B	4.20064516129032	35.1394117647059	3.06440721264384	activated
10683	DLL3	23.0909677419355	193.145882352941	3.06429037849802
81839	VANGL1	1	8.36137254901961	3.06373978526419
1827	RCAN1	4.26709677419355	35.6176470588235	3.06126547841447
10608	MXD4	5.76483870967742	48.1192156862745	3.06126097824487
93663	ARHGAP18	1.16322580645161	9.65666666666667	3.05339409750378
79183	TTPAL	3.24032258064516	26.896862745098	3.05322855781461
79018	GID4	1.48967741935484	12.3390196078431	3.05015590752458
6096	RORB	1	8.26529411764706	3.04706615823762	activated
154881	KCTD7	2.55483870967742	21.0939215686275	3.04552321142385
80325	ABTB1	1.97161290322581	16.2580392156863	3.04370504014683
90874	ZNF697	1.35161290322581	11.1311764705882	3.04185214778415
6794	STK11	3.94	32.4413725490196	3.04156732445801
6558	SLC12A2	2.18935483870968	18.0225490196078	3.0412253704489
161823	ADAL	2.2358064516129	18.3813725490196	3.03937728956497
1124	CHN2	1.26290322580645	10.3825490196078	3.03934468611202
23119	HIC2	4.26677419354839	35.0435294117647	3.03793041611084
6468	FBXW4	1.47806451612903	12.1147058823529	3.03497823158748
2044	EPHA5	10.088064516129	82.5623529411765	3.03283467938914
65249	ZSWIM4	3.35129032258064	27.4209803921569	3.03249157536361
84286	TMEM175	1.7141935483871	13.9896078431373	3.02875360398244
11173	ADAMTS7	6.02838709677419	48.9970588235294	3.02285118645677
6456	SH3GL2	6.82193548387097	55.3901960784314	3.02137762924418
50650	ARHGEF3	1	8.11039215686275	3.01977167388557
30010	NXPH1	1.55354838709677	12.5911764705882	3.01877400746111
2011	MARK2	3.57483870967742	28.9372549019608	3.01697801216841
55852	TEX2	2.73387096774194	22.101568627451	3.0151317086204
51490	C9orf114	2.19258064516129	17.723137254902	3.01493219222538
2819	GPD1	1	8.06725490196078	3.01207784164966
338699	ANKRD42	1.48774193548387	11.996862745098	3.01146097874435
10723	SLC12A7	3.85838709677419	31.0898039215686	3.01037172219078
23030	KDM4B	8.26193548387097	66.5664705882353	3.01024397777025
599	BCL2L2	1.75290322580645	14.0617647058824	3.00395940414962
161145	TMEM229B	1.18612903225807	9.46450980392157	2.99626682520792
8085	KMT2D	2.17451612903226	17.2721568627451	2.98968193598761	activated
26122	EPC2	3.59806451612903	28.5664705882353	2.98902984049222
3955	LFNG	2.6758064516129	21.2194117647059	2.98733899224897
9261	MAPKAPK2	2.47290322580645	19.5917647058824	2.98596966481876	repressed
26468	LHX6	1.10516129032258	8.72607843137255	2.98107650502141
131096	KCNH8	1.60548387096774	12.6754901960784	2.98096146466576
401548	SNX30	1.44516129032258	11.3960784313725	2.97923503399061
3265	HRAS	6.55903225806452	51.7039215686275	2.97871883273616	repressed
55690	PACS1	3.73516129032258	29.3643137254902	2.97482147356381
1789	DNMT3B	3.41096774193548	26.7556862745098	2.97159251773285
4661	MYT1	12.558064516129	98.4896078431373	2.97135737706737
5045	FURIN	1	7.83666666666667	2.97024013315714
116931	MED12L	1.66129032258065	13.008431372549	2.96907088261525	activated
200728	TMEM17	2.00548387096774	15.6974509803922	2.9685080386213
84910	TMEM87B	1.18612903225807	9.28019607843137	2.9678943268965
8772	FADD	1.18258064516129	9.22627450980392	2.9638096472411
11059	WWP1	3.05483870967742	23.8303921568627	2.96363457764422
9265	CYTH3	3.72483870967742	29.0543137254902	2.9635025165479
775	CACNA1C	1.98032258064516	15.43	2.96193070245527	activated
23403	FBXO46	2.33935483870968	18.1250980392157	2.95380618403556
23507	LRRC8B	1.2958064516129	10.0376470588235	2.95349897343164
4208	MEF2C	18.1970967741935	140.87137254902	2.95259825985004
5519	PPP2R1B	1.39225806451613	10.7694117647059	2.95144089624918
2066	ERBB4	2.97032258064516	22.9647058823529	2.95072678345455
3899	AFF3	9.07387096774194	70.1119607843137	2.9498705329637
144717	FAM109A	1.1358064516129	8.76803921568627	2.94853723916871
9409	PEX16	4.42290322580645	34.1421568627451	2.94848861945205
51412	ACTL6B	5.41193548387097	41.5992156862745	2.94233978193412
3983	ABLIM1	1.94258064516129	14.9311764705882	2.94228144639114
23150	FRMD4B	14.2974193548387	109.662745098039	2.93924681990927
5187	PER1	1.09451612903226	8.38764705882353	2.93797294144905
145407	C14orf37	7.04548387096774	53.901568627451	2.93555656176033
83636	C19orf12	9.11709677419355	69.7321568627451	2.935177711464
146691	TOM1L2	1.98258064516129	15.1419607843137	2.933100580394
7111	TMOD1	1	7.62941176470588	2.931571828114
4645	MYO5B	1.85193548387097	14.1194117647059	2.93057423985851
84925	DIRC2	1.42967741935484	10.8407843137255	2.92270756618872
55751	TMEM184C	1.19516129032258	9.05274509803922	2.92115000536457
148266	ZNF569	3.04548387096774	22.8964705882353	2.91038186003821
58513	EPS15L1	6.6341935483871	49.8501960784314	2.90960617169896
92154	MTSS1L	1.15354838709677	8.66294117647059	2.90877840004042
2649	NR6A1	1.67	12.5360784313725	2.90816610329162
22941	SHANK2	3.72903225806452	27.843137254902	2.90044859519411	activated
90204	ZSWIM1	1.89741935483871	14.1572549019608	2.89943107948825
23129	PLXND1	2.35354838709677	17.5356862745098	2.89738447371948
9695	EDEM1	2.66741935483871	19.7817647058824	2.89065457357127
949	SCARB1	1.69129032258065	12.5413725490196	2.89049901229803
534	ATP6V1G2	6.19161290322581	45.8852941176471	2.88964467231139
148156	ZNF558	1.20677419354839	8.92254901960784	2.88630017193168
10512	SEMA3C	3.64677419354839	26.9349019607843	2.88478403739169
271	AMPD2	4.83741935483871	35.4825490196078	2.87480013943514
124401	ANKS3	2.33	17.0852941176471	2.87435322350332
288	ANK3	42.128064516129	307.180588235294	2.86623350923818	activated
10370	CITED2	3.16806451612903	23.078431372549	2.86487154755105
148281	SYT6	4.60193548387097	33.4876470588235	2.86331634840853
4326	MMP17	3.73032258064516	27.1219607843137	2.86208918356935
9867	PJA2	22.5058064516129	163.186274509804	2.85815055136034
9705	ST18	12.0738709677419	87.4445098039216	2.85647951909816
27147	DENND2A	2.78322580645161	20.1464705882353	2.85569725250081	repressed
134359	POC5	1.96032258064516	14.1376470588235	2.85037904961074
6855	SYP	3.52967741935484	25.4217647058824	2.84845593623103
57579	FAM135A	5.43193548387097	39.0152941176471	2.844501526197
253461	ZBTB38	2.32806451612903	16.7143137254902	2.84388117604924
4242	MFNG	12.5474193548387	89.6703921568627	2.8372410335176	repressed
2899	GRIK3	3.45387096774194	24.5292156862745	2.82821501320519
353274	ZNF445	11.9738709677419	84.803137254902	2.82422800891106
54212	SNTG1	1	7.07705882352941	2.82314991082905
1740	DLG2	3.65129032258065	25.8350980392157	2.82285406804036
153020	RASGEF1B	4.51225806451613	31.893137254902	2.82132453353034
91663	MYADM	1.5241935483871	10.7719607843137	2.82116286383503
55102	ATG2B	1.91483870967742	13.5162745098039	2.81940277486458
79685	SAP30L	3.04806451612903	21.4427450980392	2.81452426656404
134121	C5orf49	1	7.03294117647059	2.81412815065303
5609	MAP2K7	5.75096774193548	40.4254901960784	2.81338861723948
10734	STAG3	1.34741935483871	9.47058823529412	2.81325510886308
23431	AP4E1	1.63935483870968	11.5135294117647	2.81213008682616
9435	CHST2	2.14161290322581	15.0092156862745	2.80907894873749
7732	RNF112	3.70032258064516	25.8466666666667	2.80425528413232
1677	DFFB	1.79741935483871	12.5501960784314	2.80371095679673
192683	SCAMP5	8.21129032258064	57.3076470588235	2.80304681309875
79870	BAALC	1.36838709677419	9.51450980392157	2.7976529241026
5533	PPP3CC	3.43322580645161	23.8619607843137	2.79707594407519
200933	FBXO45	5.92838709677419	41.1852941176471	2.79641773424244
23508	TTC9	2.24548387096774	15.5721568627451	2.79387051797893
140901	STK35	4.53677419354839	31.4247058823529	2.79216048179695
10818	FRS2	1.16548387096774	8.06117647058824	2.79006136578809
9647	PPM1F	2.29967741935484	15.8919607843137	2.78879372791562
7324	UBE2E1	5.62193548387097	38.8194117647059	2.78763945401661
10208	USPL1	3.39322580645161	23.3078431372549	2.78008616213301
4135	MAP6	16.9977419354839	116.272941176471	2.77410038512826
9892	SNAP91	5.12032258064516	35.0105882352941	2.77348469353299
6457	SH3GL3	1.98612903225806	13.5672549019608	2.77209758787039
57580	PREX1	9.20096774193548	62.8454901960784	2.77195170585741
84253	GARNL3	2.54451612903226	17.3682352941176	2.77098793460991
11108	PRDM4	2.89032258064516	19.6770588235294	2.76721217185966
10769	PLK2	5.5058064516129	37.4082352941176	2.76433010926839
84901	NFATC2IP	5.82870967741936	39.4182352941177	2.75761474089046
57586	SYT13	3.37483870967742	22.7901960784314	2.75552287744296
29911	HOOK2	1	6.74156862745098	2.75308431659124
182	JAG1	5.03612903225806	33.9452941176471	2.75282443316377
91010	FMNL3	1.98	13.3413725490196	2.75233476197464
7182	NR2C2	1.13161290322581	7.61549019607843	2.75055637123051
23081	KDM4C	1.46161290322581	9.81843137254902	2.74793127751695
55622	TTC27	1.80741935483871	12.116862745098	2.7450130275224
83541	FAM110A	5.00290322580645	33.511568627451	2.74382176777767
5584	PRKCI	6.80129032258065	45.4392156862745	2.74005755141714
1855	DVL1	4.32	28.8264705882353	2.73829099163277
2835	GPR12	5.37677419354839	35.8423529411765	2.73685255938095
116988	AGAP3	14.2741935483871	95.0798039215686	2.73572968838784
64860	ARMCX5	1.75193548387097	11.6488235294118	2.7331627046662
8654	PDE5A	1.37838709677419	9.15921568627451	2.73224296252675
56122	PCDHB14	2.20935483870968	14.6513725490196	2.72933877358403
9414	TJP2	4.58225806451613	30.3823529411765	2.72910298669942
25854	FAM149A	1.02967741935484	6.80529411764706	2.72446507877673
79796	ALG9	6.81935483870968	45.0254901960784	2.72303482173116
57715	SEMA4G	1.44774193548387	9.55882352941176	2.72302860621828
9962	SLC23A2	4.53161290322581	29.82	2.71818372313496
8193	DPF1	6.52322580645161	42.9219607843137	2.71805850908717
2717	GLA	6.17838709677419	40.6298039215686	2.71723623355868
3738	KCNA3	2.25612903225806	14.8298039215686	2.71657803707631
54869	EPS8L1	1.27935483870968	8.40254901960784	2.71541059202525
80301	PLEKHO2	1	6.55549019607843	2.71270366404881
54462	CCSER2	12.8574193548387	84.1582352941176	2.71050334846394
3747	KCNC2	2.14838709677419	14.0125490196078	2.70539355305923	activated
9568	GABBR2	4.44129032258065	28.96	2.70501081542988
284613	CYB561D1	3.18064516129032	20.733137254902	2.70454709955741
785	CACNB4	5.52806451612903	36.0341176470588	2.70451716095351
85508	SCRT2	8.85806451612903	57.6143137254902	2.70136387000464
10814	CPLX2	21.2154838709677	137.794901960784	2.6993330249061
163131	ZNF780B	1	6.48549019607843	2.69721562254548
747	DAGLA	2.61645161290323	16.9411764705882	2.69485058133491
166336	PRICKLE2	1.34129032258064	8.67980392156863	2.69404090958408
90809	TMEM55B	1.63387096774194	10.5709803921569	2.69374322520614
3631	INPP4A	7.06612903225806	45.7094117647059	2.69349925382999
129303	TMEM150A	1.33645161290323	8.64254901960784	2.69304927650427
283987	HID1	4.29290322580645	27.5150980392157	2.68019791331814
23245	ASTN2	2.08	13.3260784313725	2.67959685632622
57700	FAM160B1	3.5458064516129	22.6933333333333	2.67808284253358
8120	AP3B2	4.38709677419355	28.0682352941176	2.67759992561365
11099	PTPN21	2.99354838709677	19.1374509803922	2.67647018737382
25909	AHCTF1	4.37032258064516	27.8343137254902	2.67105283653985
80031	SEMA6D	2.66645161290323	16.9545098039216	2.66867601982132
60468	BACH2	13.841935483871	87.9927450980392	2.66833889449781
116986	AGAP2	1.47709677419355	9.38764705882353	2.66799925331455
149371	EXOC8	1.37096774193548	8.67803921568627	2.66217447989545
3911	LAMA5	7.75387096774194	49.0462745098039	2.6611549229012
84626	KRBA1	1.24225806451613	7.84098039215686	2.65806914446969
9839	ZEB2	34.9870967741935	220.607254901961	2.65658537628933
84804	MFSD9	1	6.29823529411765	2.65494765574512
5463	POU6F1	4.6458064516129	29.1464705882353	2.64932023824495
150726	FBXO41	1.31322580645161	8.22352941176471	2.64664270325932
478	ATP1A3	6.28387096774194	39.2888235294118	2.64439350623994
9639	ARHGEF10	2.56483870967742	16.0282352941176	2.64367558409399
4899	NRF1	4.65903225806452	29.0843137254902	2.64213903820233
55885	LMO3	12.3712903225806	77.2101960784314	2.64179539586938
63908	NAPB	4.35774193548387	27.1907843137255	2.64146509825128
111	ADCY5	3.94548387096774	24.5209803921569	2.63574251451996
84083	ZRANB3	3.01354838709677	18.7139215686275	2.63457677737007
27445	PCLO	10.9183870967742	67.7023529411765	2.63244622246301	activated
5099	PCDH7	1	6.18588235294118	2.62897939559298
5868	RAB5A	6.50548387096774	40.2307843137255	2.62857159193205
113115	MTFR2	1	6.18019607843137	2.62765261108969
90102	PHLDB2	4.30064516129032	26.5641176470588	2.62685378603
83786	FRMD8	1.92225806451613	11.8723529411765	2.62673194906635	repressed
9826	ARHGEF11	3.32354838709677	20.4727450980392	2.62290829663625
1837	DTNA	3.87838709677419	23.8880392156863	2.62275972972027
8476	CDC42BPA	9.59741935483871	58.983137254902	2.61958412240389	activated
60509	AGBL5	2.42225806451613	14.8623529411765	2.6172380536173
254263	CNIH2	12.2335483870968	74.9749019607843	2.61556480685619	repressed
84725	PLEKHA8	3.13387096774194	19.1772549019608	2.61337853739514
64793	CEP85	4.65548387096774	28.4441176470588	2.6111273002878
5291	PIK3CB	3.26903225806452	19.8970588235294	2.60561966936525
7473	WNT3	1.44903225806452	8.81843137254902	2.60543233897362
8440	NCK2	10.6448387096774	64.77	2.60517165380395
5362	PLXNA2	16.8196774193548	101.65431372549	2.5954494957346
116983	ACAP3	12.2464516129032	73.8719607843137	2.59266308012051
4665	NAB2	2.89032258064516	17.4111764705882	2.59071126707459
140767	NRSN1	1.18645161290323	7.14411764705882	2.59010257424782
399979	SNX19	7.47161290322581	44.9286274509804	2.58814337134829
154215	NKAIN2	1.15354838709677	6.92725490196078	2.58620524058809
22881	ANKRD6	3.04387096774194	18.2735294117647	2.5857761997261
6620	SNCB	2.80258064516129	16.8207843137255	2.58541718389245
81545	FBXO38	3.00774193548387	17.9819607843137	2.57979764932922
6446	SGK1	1.65354838709677	9.87960784313726	2.57888851410613
23285	KIAA1107	1.10516129032258	6.59823529411765	2.57782328963186
387119	CEP85L	11.3970967741935	68.038431372549	2.57768351202531
5100	PCDH8	1.09451612903226	6.52588235294118	2.57587976455091
5033	P4HA1	5.15064516129032	30.6629411764706	2.57367102801701
123720	WHAMM	1.87193548387097	11.1347058823529	2.57246083206181
9907	AP5Z1	3.35064516129032	19.9162745098039	2.57143698957399
219333	USP12	5.41064516129032	32.103137254902	2.56884175522142
116985	ARAP1	1.7341935483871	10.276862745098	2.56706308730116
127703	C1orf216	3.00096774193548	17.771568627451	2.56607131179907
84256	FLYWCH1	3.14806451612903	18.6241176470588	2.56463506406326
10404	CPQ	1.28290322580645	7.58725490196078	2.56416566077914
4685	NCAM2	3.06774193548387	18.1154901960784	2.56197481422461
57590	WDFY1	4.55903225806452	26.8666666666667	2.55901781569197
10178	TENM1	1.1641935483871	6.83509803921569	2.55363110353768	activated
57631	LRCH2	11.7822580645161	69.1527450980392	2.55317046442817
54751	FBLIM1	1.05903225806452	6.21274509803922	2.55248432892361
81544	GDPD5	1.96225806451613	11.5088235294118	2.55215367005269
8897	MTMR3	6.16774193548387	36.1650980392157	2.55178375481987
29956	CERS2	1.42451612903226	8.3343137254902	2.54859145128207
282969	FUOM	1.43516129032258	8.39176470588235	2.54776134418417
57189	KIAA1147	10.5825806451613	61.6556862745098	2.54254247232073
79874	RABEP2	1.56741935483871	9.11686274509804	2.54014623893094
84100	ARL6	1.56129032258064	9.07823529411765	2.53967304923178
53346	TM6SF1	1.42645161290323	8.29254901960784	2.53938482556321
64319	FBRS	6.92548387096774	40.1794117647059	2.53646966458216
64282	PAPD5	5.48258064516129	31.8021568627451	2.53619758097689
340719	NANOS1	3.1541935483871	18.2754901960784	2.53456700856282
79605	PGBD5	1.16322580645161	6.73862745098039	2.53432358649923
81926	ABHD17A	2.13064516129032	12.3382352941176	2.53377381321689	repressed
53373	TPCN1	1.54806451612903	8.96333333333333	2.5335697518224
64395	GMCL1	2.20645161290323	12.7723529411765	2.5332243101496
728294	D2HGDH	10.6006451612903	61.2901960784314	2.53150424954153
10675	CSPG5	1.35451612903226	7.81980392156863	2.5293548603161
79180	EFHD2	1.34935483870968	7.78470588235294	2.52837275070929
200014	CC2D1B	1.7058064516129	9.83450980392157	2.5273991825582
285368	PRRT3	1	5.75647058823529	2.52518453640798
54331	GNG2	27.4529032258065	157.845882352941	2.52348599458996
320	APBA1	2.44387096774194	14.0513725490196	2.52347104048575
54468	MIOS	3.85935483870968	22.1760784313725	2.52257266498635
6482	ST3GAL1	5.93451612903226	34.0703921568627	2.52131624364385
4008	LMO7	8.93032258064516	51.2692156862745	2.5213086332771	activated
58509	CACTIN	1.89677419354839	10.8456862745098	2.51550149957626
29767	TMOD2	7.75677419354839	44.33	2.51475465324294
36	ACADSB	2.86451612903226	16.3617647058824	2.51396499304005
285671	RNF180	2.23838709677419	12.7556862745098	2.51060906381566
1953	MEGF6	3.18806451612903	18.1619607843137	2.51016723568076
27242	TNFRSF21	3.36064516129032	19.0678431372549	2.50433153545079
3177	SLC29A2	2.76193548387097	15.6558823529412	2.50295329475247
22983	MAST1	12.6774193548387	71.83	2.50232541853727
4627	MYH9	10.6951612903226	60.458431372549	2.49898530843855	activated
257194	NEGR1	2.21225806451613	12.498431372549	2.49815544555655
22853	LMTK2	3.49032258064516	19.7121568627451	2.49765335801007
7122	CLDN5	14.8851612903226	83.9970588235294	2.49646395828291
83590	TMUB1	2.17806451612903	12.2676470588235	2.49373997220594
401207	C5orf63	4.49612903225806	25.3105882352941	2.49298569257171
8036	SHOC2	8.97387096774194	50.4264705882353	2.49037890754636
2673	GFPT1	12.6022580645161	70.6735294117647	2.48748770043712
196441	ZFC3H1	11.1516129032258	62.5060784313726	2.48674410401625	activated
124925	SEZ6	14.2793548387097	79.9898039215686	2.48588531753128
51360	MBTPS2	2.1141935483871	11.8405882352941	2.4855613927181
50853	VILL	2.73161290322581	15.2774509803922	2.4835788930067
26512	INTS6	3.32645161290323	18.5405882352941	2.47863106361079
23426	GRIP1	6.62677419354839	36.9150980392157	2.47783232431328
3995	FADS3	1.53225806451613	8.49137254901961	2.47033847251476
283337	ZNF740	2.70387096774194	14.94	2.46608193704549
869	CBLN1	4.24354838709677	23.4105882352941	2.46381815234182
9517	SPTLC2	4.45064516129032	24.4901960784314	2.46011793669697
60680	CELF5	22.9867741935484	126.222352941176	2.45709149494636
284434	NWD1	1.55645161290323	8.54176470588235	2.45627343071814
113791	PIK3IP1	1.4358064516129	7.8756862745098	2.45554435778938
285600	KIAA0825	9.04129032258064	49.4764705882353	2.4521420032639
5523	PPP2R3A	7.79677419354839	42.5950980392157	2.44973815309518
6015	RING1	6.03225806451613	32.9501960784314	2.44951699576527
816	CAMK2B	8.09612903225807	44.0182352941176	2.44279711994236
9306	SOCS6	3.57451612903226	19.4272549019608	2.44226219337005
5800	PTPRO	6.5758064516129	35.7354901960784	2.44211783702895
6621	SNAPC4	2.24483870967742	12.1819607843137	2.44006266825051
9392	TGFBRAP1	5.7641935483871	31.216862745098	2.43713487176264
9690	UBE3C	3.84225806451613	20.8072549019608	2.43706031738342
129563	DIS3L2	5.07225806451613	27.4119607843137	2.43410547481155
53834	FGFRL1	1.87322580645161	10.121568627451	2.43383617069402
22854	NTNG1	2.13354838709677	11.5229411764706	2.43318226975712
57575	PCDH10	1.94322580645161	10.4239215686274	2.42337267435179
5334	PLCL1	1	5.36372549019608	2.42323540352372
51291	GMIP	2.27838709677419	12.211568627451	2.42216374637159
2517	FUCA1	1.40903225806452	7.54980392156863	2.4217345354604
2898	GRIK2	1.35193548387097	7.23333333333333	2.41963433086694
6585	SLIT1	11.0825806451613	59.2464705882353	2.41843535213238
578	BAK1	2.87290322580645	15.3556862745098	2.41819168911635
100132074	FOXO6	2.2741935483871	12.1452941176471	2.41697048043119
10391	CORO2B	20.4303225806452	108.651764705882	2.41092771822961
51409	HEMK1	3.89225806451613	20.6660784313726	2.4085853787902
23592	LEMD3	7.64032258064516	40.4686274509804	2.40509846243574
55558	PLXNA3	9.75225806451613	51.6523529411765	2.40502586206517
79006	METRN	16.4103225806452	86.818431372549	2.40339775789993	repressed
57614	KIAA1468	2.16064516129032	11.4103921568627	2.40081430993368
112	ADCY6	5.10516129032258	26.8392156862745	2.39431406590599
56975	FAM20C	12.0341935483871	63.1925490196078	2.39261499624401
26256	CABYR	2.48677419354839	13.0547058823529	2.39222253699839
8812	CCNK	4.3858064516129	23.0054901960784	2.39106414591419
7743	ZNF189	7.83032258064516	41.0682352941176	2.39087930829785
55213	RCBTB1	5.16870967741936	27.0537254901961	2.38795120252449
51088	KLHL5	9.83225806451613	51.4592156862745	2.38783478112465
1804	DPP6	6.65903225806452	34.771568627451	2.38452371783836
6832	SUPV3L1	8.68161290322581	45.306862745098	2.38369459340885
90293	KLHL13	6.20354838709677	32.3466666666667	2.38245148136653
56978	PRDM8	15.5316129032258	80.9670588235294	2.38212741542709
170506	DHX36	17.3848387096774	90.6072549019608	2.3817968888365
114798	SLITRK1	4.43161290322581	23.0109803921569	2.37641867738599
1848	DUSP6	16.2067741935484	84.1458823529412	2.37629571103613
6900	CNTN2	4.78967741935484	24.8662745098039	2.37618997764768
55295	KLHL26	1.4141935483871	7.33235294117647	2.37429664855487
78997	GDAP1L1	19.8393548387097	102.809607843137	2.37353807847285
54707	GPN2	1.33774193548387	6.93137254901961	2.37334123109354
30850	CDR2L	1	5.17960784313725	2.37284287316704
65982	ZSCAN18	14.6606451612903	75.9309803921569	2.37274004323107
3661	IRF3	4.86387096774194	25.1854901960784	2.37241594951349
138046	RALYL	2.13	11.0103921568627	2.3699405186869
84260	TCHP	11.3587096774194	58.7135294117647	2.369894025766
9726	ZNF646	4.34516129032258	22.4462745098039	2.36899438016731
6571	SLC18A2	1.43064516129032	7.38176470588235	2.3672998633133	activated
55208	DCUN1D2	1.40548387096774	7.24392156862745	2.36570402827433
54492	NEURL1B	8.21677419354839	42.3080392156863	2.36428779942539
128434	VSTM2L	10.7803225806452	55.2888235294118	2.35858752479711
10869	USP19	8.71838709677419	44.7041176470588	2.35827455663028
9213	XPR1	47.7529032258064	244.412745098039	2.35565916537204
6653	SORL1	2.02032258064516	10.3294117647059	2.35410052995449
56998	CTNNBIP1	8.45967741935484	43.1976470588235	2.35227817478444
51542	VPS54	2.17612903225806	11.1047058823529	2.35133517440784
3321	IGSF3	12.6154838709677	64.3650980392157	2.35108305687332
535	ATP6V0A1	15.878064516129	80.853137254902	2.34826869067056
84254	CAMKK1	2.98741935483871	15.2080392156863	2.34786248397244
1363	CPE	25.048064516129	127.382352941176	2.34639439139607
151963	MB21D2	1.1641935483871	5.90960784313725	2.34373146975135
23423	TMED3	12.56	63.703137254902	2.34252795991038
8459	TPST2	2.07290322580645	10.5011764705882	2.34082629491698	repressed
84440	RAB11FIP4	2.58483870967742	13.0933333333333	2.34068626262414
132864	CPEB2	3.61838709677419	18.3203921568627	2.34003172382075
401612	SLC25A53	1.50741935483871	7.6156862745098	2.33689322685713
333	APLP1	36.6370967741936	184.970196078431	2.33591574066399
23394	ADNP	42.8609677419355	215.672352941176	2.33110491956814
25840	METTL7A	1.77709677419355	8.94117647058824	2.33094242478976
266727	MDGA1	2.93354838709677	14.7545098039216	2.33043729652883
7923	HSD17B8	2.32032258064516	11.6470588235294	2.32756839022398
3614	IMPDH1	9.6441935483871	48.2990196078431	2.32426139532625
10293	TRAIP	10.8938709677419	54.5209803921569	2.32329482039296
146664	MGAT5B	1.29935483870968	6.5	2.32264425029591
22809	ATF5	2.00258064516129	10.0174509803922	2.3225832029332
79659	DYNC2H1	5.5458064516129	27.7325490196078	2.32211105449033	activated
283373	ANKRD52	3.58483870967742	17.9198039215686	2.32157473625992
166	AES	43.5961290322581	217.765294117647	2.32050209923254
54838	WBP1L	4.61290322580645	23.0409803921569	2.3204551731585
51684	SUFU	2.52806451612903	12.5380392156863	2.31020656063294
374354	NHLRC2	4.61903225806452	22.9072549019608	2.31014205646587
85463	ZC3H12C	5.78161290322581	28.6147058823529	2.30721285386308	activated
400961	PAIP2B	3.41612903225806	16.8998039215686	2.30657213403639
4849	CNOT3	2.99677419354839	14.8221568627451	2.30627311208223
23171	GPD1L	4.62741935483871	22.8407843137255	2.30333243864075
11228	RASSF8	1.44451612903226	7.12196078431373	2.30168817911334
1407	CRY1	10.2864516129032	50.5811764705882	2.29785519333096
8556	CDC14A	3.18032258064516	15.5890196078431	2.29328518907595
9912	ARHGAP44	2.28709677419355	11.193137254902	2.29102513994536
10396	ATP8A1	5.82483870967742	28.3721568627451	2.28418582196339
6263	RYR3	1.21612903225807	5.91137254901961	2.28119683759628	activated
29091	STXBP6	3.68548387096774	17.9096078431373	2.28080779798364
9066	SYT7	7.31032258064516	35.5043137254902	2.27998734662581
9886	RHOBTB1	4.0841935483871	19.8166666666667	2.27859116752921
503542	SPRN	4.19354838709677	20.3309803921569	2.27743637815149
124930	ANKRD13B	11.5054838709677	55.6541176470588	2.27416677294765
201626	PDE12	2.84290322580645	13.7503921568627	2.27403586970552
122060	SLAIN1	14.0258064516129	67.7398039215686	2.271920085973
9439	MED23	5.04806451612903	24.3692156862745	2.27125756550346
255027	MPV17L	1.42129032258065	6.84862745098039	2.26861360370529
4929	NR4A2	2.70903225806452	13.0521568627451	2.26843875338221
65977	PLEKHA3	2.57838709677419	12.4098039215686	2.26693954180812
166968	MIER3	6.82645161290323	32.8554901960784	2.26692670085223
388135	C15orf59	1.46387096774194	7.0321568627451	2.26417885879373
4741	NEFM	6.99451612903226	33.5762745098039	2.26314600113374	activated
55770	EXOC2	8.14677419354839	39.048431372549	2.26096376828206
23637	RABGAP1	12.4874193548387	59.8466666666667	2.2607955333695
162681	C18orf54	2.23870967741935	10.7074509803922	2.25787572004863
4125	MAN2B1	4.18870967741936	20.0049019607843	2.25577575988243
64689	GORASP1	1.95129032258065	9.31176470588235	2.25462615881176
54329	GPR85	4.38548387096774	20.9278431372549	2.25461569653652
133022	TRAM1L1	1.37806451612903	6.55725490196078	2.25044854670443
9980	DOPEY2	6.33709677419355	30.0949019607843	2.24762516462754
91300	R3HDM4	1.34548387096774	6.38666666666667	2.24693805851267
23092	ARHGAP26	1.41967741935484	6.72686274509804	2.24437066548819	activated
9451	EIF2AK3	1	4.73117647058824	2.24219897367865
63974	NEUROD6	371.822903225806	1755.69647058824	2.23935590553804
8643	PTCH2	1.23032258064516	5.80705882352941	2.2387710199732
92714	ARRDC1	3.63870967741935	17.1243137254902	2.23454731950482
9644	SH3PXD2A	3.50645161290323	16.4927450980392	2.23374782004216
117246	FTSJ3	6.41516129032258	30.1558823529412	2.23288200548306
57540	PTCHD2	9.30258064516129	43.6807843137255	2.23129586350333
50863	NTM	11.3090322580645	53.0870588235294	2.23088473458411
169714	QSOX2	6.50709677419355	30.4992156862745	2.2286862280927
23038	WDTC1	3.88064516129032	18.1872549019608	2.22855937885616
57231	SNX14	4.63225806451613	21.663137254902	2.22545465546846
23348	DOCK9	4.01806451612903	18.7703921568627	2.22388615768645	activated
84937	ZNRF1	20.6303225806452	96.2588235294118	2.22215241113841
4753	NELL2	26.2706451612903	122.562745098039	2.22199697939052
51735	RAPGEF6	1.47612903225806	6.88509803921569	2.22165836090732
4124	MAN2A1	3.01774193548387	14.021568627451	2.21610641314905
5606	MAP2K3	1.97064516129032	9.15588235294118	2.21603090041283
1954	MEGF8	15.37	71.3958823529412	2.21572370642046
2781	GNAZ	13.7809677419355	63.9778431372549	2.21489515411589
2235	FECH	2.10612903225806	9.77235294117647	2.21411214338201
221496	LEMD2	4.26290322580645	19.6723529411765	2.20626131415335
55892	MYNN	11.151935483871	51.4345098039216	2.20544253539965
57659	ZBTB4	7.41870967741936	34.2141176470588	2.20535155350242
165215	FAM171B	3.98838709677419	18.3723529411765	2.2036590599501
57520	HECW2	1	4.6056862745098	2.20341614243259
1780	DYNC1I1	6.43322580645161	29.6190196078431	2.20290965475169
58480	RHOU	6.16838709677419	28.3688235294118	2.20134111305237
388403	YPEL2	1.12193548387097	5.14980392156863	2.19852778568177
83694	RPS6KL1	8.63322580645161	39.5574509803922	2.1959778355776
51363	CHST15	1	4.57333333333333	2.19324607567693
2571	GAD1	2.45387096774194	11.1809803921569	2.18791540021739
5430	POLR2A	11.7441935483871	53.5021568627451	2.1876494032634
54715	RBFOX1	17.481935483871	79.6147058823529	2.18717002081439
285521	COX18	3.47483870967742	15.8196078431373	2.18669591741404
80007	C10orf88	5.28612903225806	24.048431372549	2.1856592470493
23473	CAPN7	9.13870967741935	41.5649019607843	2.18530342244038
8569	MKNK1	1.1741935483871	5.33843137254902	2.18474565240115
5126	PCSK2	7.67741935483871	34.8788235294118	2.18365802047253
1798	DPAGT1	6.22451612903226	28.2133333333333	2.18034352987966
57787	MARK4	2.3458064516129	10.6321568627451	2.18027840570527
10712	FAM189B	3.24193548387097	14.6864705882353	2.17956044718265
57727	NCOA5	10.0003225806452	45.2917647058824	2.17920221450184
1917	EEF1A2	4.68483870967742	21.2049019607843	2.17832652822835
64130	LIN7B	6.2058064516129	28.0709803921569	2.17738884401753
79735	TBC1D17	4.86064516129032	21.9858823529412	2.17735771006916
57574	MARCH4	4.98	22.5041176470588	2.17597135250219
54480	CHPF2	1.41387096774193	6.38470588235294	2.17496969895428
10123	ARL4C	13.5525806451613	61.1445098039216	2.17365537249719
4089	SMAD4	21.8848387096774	98.5207843137255	2.17049636161231
65083	NOL6	5.72838709677419	25.7760784313725	2.16983189760963
9679	FAM53B	8.04290322580645	36.1858823529412	2.169638684172
2969	GTF2I	4.94129032258065	22.2280392156863	2.16942096259014
55898	UNC45A	5.32193548387097	23.9011764705882	2.16705870645813
1745	DLX1	3.22258064516129	14.4552941176471	2.16530959557737
10629	TAF6L	3.34290322580645	14.9862745098039	2.16446828738674	repressed
5600	MAPK11	2.36516129032258	10.5935294117647	2.1631728519447
84457	PHYHIPL	7.07225806451613	31.6376470588235	2.16139948401944
10422	UBAC1	9.45903225806452	42.3129411764706	2.16133447517083
22824	HSPA4L	1.12290322580645	5.0156862745098	2.1592135134607
57646	USP28	5.52032258064516	24.6317647058824	2.15769551264494
283450	HECTD4	8.72354838709677	38.9025490196078	2.15687769874659	activated
8932	MBD2	4.46129032258065	19.8398039215686	2.15286482653133
84530	SRRM4	48.9290322580645	217.426470588235	2.15176493813332
115207	KCTD12	7.49870967741936	33.3149019607843	2.15145337427478
375323	LHFPL4	1.52967741935484	6.79490196078431	2.15122528811513
6750	SST	16.9745161290323	75.17	2.14678655385412
968	CD68	1.37225806451613	6.07450980392157	2.14621617413164
54454	ATAD2B	4.78645161290323	21.1064705882353	2.14065692216364
6876	TAGLN	1	4.40490196078431	2.13910990966458
26470	SEZ6L2	17.3864516129032	76.5741176470588	2.13889331374353
23264	ZC3H7B	2.33548387096774	10.2841176470588	2.13862463243276
85315	PAQR8	1.52903225806452	6.73137254901961	2.13828186147438
79762	C1orf115	6.55483870967742	28.8558823529412	2.13823325969055
54971	BANP	6.33774193548387	27.8994117647059	2.13819388299691
2053	EPHX2	4.16322580645161	18.3229411764706	2.13787738660008
84865	CCDC142	5.63129032258065	24.7313725490196	2.13480487264177
114825	PWWP2A	17.861935483871	78.3998039215686	2.13396162965496
23057	NMNAT2	11.6225806451613	51.006862745098	2.13376093203919
9454	HOMER3	9.42709677419355	41.3190196078431	2.13192057991986
23214	XPO6	10.8277419354839	47.3762745098039	2.12943234658342
115908	CTHRC1	1.08870967741935	4.76313725490196	2.1292928354399	repressed
79598	CEP97	17.7312903225806	77.5207843137255	2.1282856409174	activated
50512	PODXL2	7.59548387096774	33.176862745098	2.12696368951117
84894	LINGO1	9.34709677419355	40.8180392156863	2.12661664510371
643836	ZFP62	12.6612903225806	55.2054901960784	2.12438731191874
89910	UBE3B	11.3593548387097	49.463137254902	2.12247284872981
9472	AKAP6	8.29741935483871	36.1127450980392	2.12177348293868
7275	TUB	1.8841935483871	8.19921568627451	2.12153874293382
2674	GFRA1	1	4.35156862745098	2.12153554880273
1630	DCC	18.2845161290323	79.56	2.12142082764289
83475	DOHH	1.47516129032258	6.41705882352941	2.12103950445411
84687	PPP1R9B	6.86741935483871	29.8666666666667	2.12069626283815
1995	ELAVL3	79.8625806451613	346.838823529412	2.11867379972552
10382	TUBB4A	5.4958064516129	23.8480392156863	2.11746755071256
64409	WBSCR17	1.91096774193548	8.28725490196078	2.11659087259214
56934	CA10	3.11225806451613	13.4882352941176	2.1156680117046
5597	MAPK6	33.7151612903226	145.967647058824	2.11417923444824
23345	SYNE1	11.0051612903226	47.6403921568627	2.11400499959606	activated
6095	RORA	1.24161290322581	5.37078431372549	2.11291732956294
9475	ROCK2	22.8245161290323	98.7262745098039	2.11284981136735
79134	TMEM185B	5.87290322580645	25.3574509803922	2.11026395772412
23229	ARHGEF9	9.01354838709677	38.8792156862745	2.10883204313493
51201	ZDHHC2	3.67193548387097	15.8296078431373	2.10801289927557
81627	TRMT1L	3.29096774193548	14.1754901960784	2.10681483485293
64919	BCL11B	90.6258064516129	389.845490196078	2.10490861197668
80758	PRR7	1.62161290322581	6.97450980392157	2.10466234866923
23443	SLC35A3	11.3425806451613	48.7176470588235	2.10269553913262
26273	FBXO3	18.5074193548387	79.4288235294118	2.10155889265924
5581	PRKCE	1.10612903225807	4.7321568627451	2.09697820852024
6528	SLC5A5	1.78548387096774	7.63117647058824	2.09559038772082
649	BMP1	3.51935483870968	15.0398039215686	2.0954028721285
26099	SZRD1	11.2390322580645	47.9856862745098	2.0940863092421
8658	TNKS	16.3432258064516	69.6943137254902	2.09234818413767
8492	PRSS12	1	4.26274509803922	2.09178278816845
23139	MAST2	7.32741935483871	31.2194117647059	2.09106626445666
9757	KMT2B	7.60193548387097	32.3586274509804	2.08971172808109
64927	TTC23	3.76903225806452	15.9933333333333	2.08520460912997
10000	AKT3	43.4029032258065	184.108431372549	2.08469224434697
4528	MTIF2	5.05903225806452	21.4560784313725	2.08445307265913
9755	TBKBP1	5.19193548387097	22.0119607843137	2.08394330221458
128637	TBC1D20	7.36161290322581	31.1829411764706	2.08266321413365
5422	POLA1	5.85741935483871	24.8105882352941	2.08261884929372
6511	SLC1A6	4.32612903225806	18.3192156862745	2.08220913636455
85465	EPT1	3.28774193548387	13.9135294117647	2.08131946410164
147807	ZNF524	2.83193548387097	11.9772549019608	2.08043698705195
79710	MORC4	3.46709677419355	14.6374509803922	2.07786432830449
8027	STAM	12.8522580645161	54.2074509803922	2.0764693135287
4254	KITLG	1.35064516129032	5.68803921568627	2.07428270894703
63894	VIPAS39	5.1258064516129	21.5801960784314	2.07385706407717
357	SHROOM2	2.19548387096774	9.24294117647059	2.07381306578639
6305	SBF1	8.90516129032258	37.4872549019608	2.07368653776422
140609	NEK7	9.10870967741936	38.3043137254902	2.07218826944676
4686	NCBP1	18.7006451612903	78.6056862745098	2.07154563659729
22927	HABP4	5.83709677419355	24.5252941176471	2.07094754574332
27239	GPR162	4.2841935483871	17.9945098039216	2.07046123795999
4864	NPC1	1.22032258064516	5.11156862745098	2.0665035294471
8916	HERC3	2.32548387096774	9.72352941176471	2.06394913946519
58476	TP53INP2	2.50032258064516	10.4317647058823	2.06079709208863
10912	GADD45G	32.2312903225806	134.317843137255	2.05911711851308
2892	GRIA3	13.0670967741935	54.4054901960784	2.05781360368569
774	CACNA1B	2.29838709677419	9.56372549019608	2.0569509219723	activated
56061	UBFD1	9.73258064516129	40.4264705882353	2.05440595632147
1911	PHC1	11.7529032258065	48.7786274509804	2.05323198543258
55602	CDKN2AIP	6.87967741935484	28.4856862745098	2.04982433868895
57282	SLC4A10	3.65677419354839	15.1278431372549	2.04856286109989	activated
112950	MED8	12.5738709677419	51.9219607843137	2.04591600293452
23051	ZHX3	4.62322580645161	19.0829411764706	2.04531181206512
9797	TATDN2	3.83548387096774	15.816862745098	2.0439829718491
6714	SRC	5.36516129032258	22.1086274509804	2.04291601465232
2913	GRM3	7.21870967741935	29.7017647058824	2.04073576222707
114789	SLC25A25	6.21032258064516	25.5074509803922	2.03817862131692
23046	KIF21B	26.9061290322581	110.499411764706	2.03803193816026
9910	RABGAP1L	6.95193548387097	28.5170588235294	2.03633859491265
6609	SMPD1	3.50935483870968	14.3862745098039	2.03541530372821	repressed
4798	NFRKB	9.94225806451613	40.6949019607843	2.033202616763
1826	DSCAM	1	4.0878431372549	2.03133983682191
11054	OGFR	3.07258064516129	12.5509803921569	2.03027727930037
2180	ACSL1	4.58483870967742	18.7182352941176	2.02950154067868
6901	TAZ	4.89903225806452	19.9649019607843	2.02689729121727
7922	SLC39A7	1.02967741935484	4.19313725490196	2.02583761895673
64641	EBF2	9.76387096774194	39.7217647058824	2.02440458368872
57176	VARS2	6.46451612903226	26.2447058823529	2.0214121366946
51696	HECA	14.6122580645161	59.2501960784314	2.0196407901517
285527	FRYL	36.9090322580645	149.530980392157	2.01839860215628	activated
112611	RWDD2A	2.64612903225806	10.7045098039216	2.01626341322616
64236	PDLIM2	6.07225806451613	24.5580392156863	2.01589036621953
55964	SEPT3	64.6748387096774	261.505490196078	2.01556477941604
64789	EXO5	4.9641935483871	20.0525490196078	2.01415436863053
5426	POLE	6.11709677419355	24.6996078431373	2.01356913104252
6584	SLC22A5	2.78870967741935	11.26	2.01353717393746
54511	HMGCLL1	1.53516129032258	6.19529411764706	2.01278253602211
9452	ITM2A	27.4906451612903	110.91137254902	2.01239463299456
23172	FAM175B	11.53	46.491568627451	2.01157659027882
10397	NDRG1	1.46548387096774	5.90803921568627	2.01130231239042
730094	C16orf52	7.84483870967742	31.6062745098039	2.01039530140344
134111	UBE2QL1	4.7858064516129	19.2790196078431	2.01019773089466
4037	LRP3	16.9203225806452	67.9972549019608	2.00671943165446
54923	LIME1	2.84225806451613	11.3947058823529	2.00325423055903
84187	TMEM164	2.83806451612903	11.3678431372549	2.00197926149
2845	GPR22	1.37290322580645	5.49254901960784	2.00024590505399
6936	GCFC2	9.61870967741936	38.4803921568627	2.00020822316138
387763	C11orf96	3.65838709677419	14.623137254902	1.99897322002873
9118	INA	25.2561290322581	100.913921568628	1.99841977345555
10892	MALT1	2.78903225806452	11.1290196078431	1.99648998065135
8945	BTRC	7.98354838709677	31.818431372549	1.99476069571213
29979	UBQLN1	33.8167741935484	134.774509803922	1.99473671056522
57621	ZBTB2	4.53451612903226	18.0545098039216	1.99333873396052
25989	ULK3	5.41225806451613	21.528431372549	1.99194066824205
166614	DCLK2	12.0748387096774	48.0139215686275	1.99144885556393
2770	GNAI1	19.6709677419355	78.1788235294118	1.99070993960952
7057	THBS1	1.63	6.47803921568627	1.99068523725267
84258	SYT3	5.53774193548387	21.9829411764706	1.98901469324086
90952	ESAM	5.10290322580645	20.2182352941176	1.98626689310037
594	BCKDHB	4.04193548387097	16.0041176470588	1.98532493999733
23309	SIN3B	8.23129032258065	32.5666666666667	1.98420555365044
10347	ABCA7	5.54451612903226	21.9292156862745	1.9837207472128
27342	RABGEF1	18.3916129032258	72.7150980392157	1.98320693963534
342357	ZKSCAN2	6.55967741935484	25.9270588235294	1.98276178023985	activated
84302	TMEM246	6.54741935483871	25.8713725490196	1.98235830508777
9275	BCL7B	8.41032258064516	33.2280392156863	1.98216812051675
57634	EP400	23.1551612903226	91.3478431372549	1.98003685865252
23432	GPR161	53.9590322580645	212.773333333333	1.97938097140719
1263	PLK3	8.76516129032258	34.5554901960784	1.97906240123965
84640	USP38	3.82193548387097	15.058431372549	1.97819616294985
57591	MKL1	8.62967741935484	33.9113725490196	1.97439064100851
57645	POGK	11.9383870967742	46.796862745098	1.9708038765943
256987	SERINC5	6.52516129032258	25.5776470588235	1.97079808571515
3800	KIF5C	120.328387096774	471.662352941176	1.97077741872239
9479	MAPK8IP1	15.3003225806452	59.9298039215686	1.96971158375402
23367	LARP1	36.4029032258065	142.58568627451	1.96970374267374
382	ARF6	17.3309677419355	67.8323529411765	1.96862132206811
257019	FRMD3	7.39548387096774	28.906862745098	1.96669559393335
196500	PIANP	11.0829032258065	43.291568627451	1.96575022355345
117583	PARD3B	4.83096774193548	18.8535294117647	1.9644504991302
57717	PCDHB16	1.29161290322581	5.03941176470588	1.96408158344969
8826	IQGAP1	9.48741935483871	36.9947058823529	1.9632312065524
51204	TACO1	6.53903225806452	25.4886274509804	1.96270464163778
9687	GREB1	3.90806451612903	15.2317647058824	1.96255690847357
9911	TMCC2	6.82161290322581	26.5776470588235	1.96202859154023
26034	IPCEF1	6.4158064516129	24.9498039215686	1.95932595242551
359845	FAM101B	3.36451612903226	13.0782352941176	1.9586969421946
11261	CHP1	11.9151612903226	46.2850980392157	1.95774929702521
1154	CISH	1.81741935483871	7.05666666666667	1.95709551529838	repressed
51555	PEX5L	2.08354838709677	8.08607843137255	1.95639759245238
1381	CRABP1	3.94451612903226	15.2825490196078	1.95396495279504
79012	CAMKV	20.1722580645161	78.078431372549	1.9525514818795
222962	SLC29A4	6.62064516129032	25.62	1.95222676053711
3996	LLGL1	2.30677419354839	8.91372549019608	1.95015174414614
79932	KIAA0319L	48.1890322580645	186.149803921569	1.94968736255995
2334	AFF2	5.97935483870968	23.0921568627451	1.94934119676095
8567	MADD	9.78645161290322	37.766862745098	1.94826318044243
78992	YIPF2	4.26903225806452	16.4666666666667	1.94756757192097
83992	CTTNBP2	44.3748387096774	171.12568627451	1.94724254638447
4610	MYCL	5.48064516129032	21.1101960784314	1.94552234194984
55731	FAM222B	11.4225806451613	43.9664705882353	1.94451509651547
6472	SHMT2	26.0003225806452	100.065098039216	1.94433743292917
57679	ALS2	6.61516129032258	25.4582352941176	1.94428418070957
5563	PRKAA2	10.8993548387097	41.9411764705882	1.94412458966554
3628	INPP1	5.02354838709677	19.3245098039216	1.94365314035927
92691	TMEM169	4.78032258064516	18.3672549019608	1.94195614198929
64838	FNDC4	11.458064516129	43.9903921568627	1.94082509616977
84984	CEP19	4.45064516129032	17.07	1.93937667031352
9640	ZNF592	3.69096774193548	14.1447058823529	1.93819114441182
81617	CAB39L	9.77290322580645	37.4390196078431	1.93768354562908
10846	PDE10A	7.56451612903226	28.9403921568627	1.93576476400403
50640	PNPLA8	15.3458064516129	58.688431372549	1.93523168400947
56262	LRRC8A	6.29806451612903	24.0862745098039	1.93523082388493
5593	PRKG2	1	3.82117647058824	1.93401688616011
85300	ATCAY	61.1387096774194	233.337647058824	1.93226108294965
56999	ADAMTS9	5.36258064516129	20.4135294117647	1.92852629587178
127700	OSCP1	6.68677419354839	25.4288235294118	1.92708241222345
9659	PDE4DIP	9.45935483870968	35.9249019607843	1.92517052441327
6595	SMARCA2	14.8348387096774	56.2521568627451	1.92291917295093
1496	CTNNA2	12.7790322580645	48.4401960784314	1.92242611812409
23291	FBXW11	16.7687096774194	63.5376470588235	1.92183998447769
64375	IKZF4	8.26903225806452	31.3	1.92037225435191
23194	FBXL7	9.38387096774193	35.4562745098039	1.9177858752474
8320	EOMES	62.8341935483871	236.841960784314	1.9143029290642
9829	DNAJC6	6.35516129032258	23.9517647058824	1.91413130845121
54332	GDAP1	21.2251612903226	79.9460784313726	1.91325175051557
60493	FASTKD5	2.92483870967742	10.9962745098039	1.91058585315672
84502	JPH4	20.0322580645161	75.1827450980392	1.90807653956992
8497	PPFIA4	1.56548387096774	5.87333333333333	1.90757087382193
7023	TFAP4	3.93064516129032	14.7354901960784	1.90645701890684
23067	SETD1B	8.56193548387097	32.0898039215686	1.906106104689	activated
123879	DCUN1D3	1.02967741935484	3.85745098039216	1.905455387412
9820	CUL7	6.62903225806452	24.8323529411765	1.90535078933923
8503	PIK3R3	27.0483870967742	101.256666666667	1.90440242373341
51719	CAB39	18.54	69.2735294117647	1.90166293550184
7982	ST7	14.8012903225806	55.2433333333333	1.90007742291541
22979	EFR3B	20.678064516129	77.1639215686274	1.8998253103188
6091	ROBO1	30.4567741935484	113.643725490196	1.89968297905483
54842	MFSD6	2.19064516129032	8.16843137254902	1.89870323972192
79772	MCTP1	1.99806451612903	7.44235294117647	1.89715564197927
84249	PSD2	5.38709677419355	20.0423529411765	1.8954720014381
2178	FANCE	4.18935483870968	15.5694117647059	1.89391444741981
7741	ZSCAN26	9.76032258064516	36.2698039215686	1.89376821091279	activated
9547	CXCL14	2.12612903225806	7.89470588235294	1.89265636443076
84263	HSDL2	6.00612903225806	22.2750980392157	1.89092440710377
374920	C19orf68	1.84741935483871	6.85	1.89059260010967
6092	ROBO2	38.9067741935484	143.593529411765	1.8838974652991
10746	MAP3K2	12.1654838709677	44.8974509803922	1.8838398360563	activated
51278	IER5	18.0277419354839	66.4741176470588	1.88257401906465
2009	EML1	16.1048387096774	59.3701960784314	1.88224466564821
8499	PPFIA2	32.8329032258065	121.026078431373	1.88210371979668
4931	NVL	5.52451612903226	20.3443137254902	1.88070559973665
729956	SHISA7	2.60161290322581	9.56372549019608	1.87816640275612	activated
23774	BRD1	11.1835483870968	41.1111764705882	1.87815264957845
4215	MAP3K3	10.2467741935484	37.6409803921569	1.87713440116698
2572	GAD2	5.10193548387097	18.7027450980392	1.87413347674144	activated
10380	BPNT1	7.33290322580645	26.8807843137255	1.87411882794372
3572	IL6ST	7.24612903225806	26.5623529411765	1.87410054758616
221061	FAM171A1	17.3390322580645	63.5388235294118	1.87361499789042
57670	KIAA1549	16.7196774193548	61.2629411764706	1.87346761794879
27253	PCDH17	10.9225806451613	40.0201960784314	1.87341447799256
2562	GABRB3	13.7196774193548	50.2619607843137	1.87322039283587
5836	PYGL	1.34129032258064	4.90843137254902	1.87164050167683
50484	RRM2B	2.06322580645161	7.54333333333333	1.87030045545228
5612	PRKRIR	33.3445161290323	121.444117647059	1.86477119324481
9181	ARHGEF2	15.7758064516129	57.4525490196078	1.86465714593667
25943	C20orf194	14.2987096774194	52.0556862745098	1.86417080077002
7795	MEMO1	7.5458064516129	27.4372549019608	1.86238914615254
51072	MEMO1	7.5458064516129	27.4372549019608	1.86238914615254
9990	SLC12A6	4.13161290322581	15.0192156862745	1.86203247882921
1272	CNTN1	8.65967741935484	31.4737254901961	1.86176276865013
5295	PIK3R1	1.75645161290323	6.38313725490196	1.86160183657215
54853	WDR55	2.51258064516129	9.12647058823529	1.86088714282797
79039	DDX54	7.76096774193548	28.1611764705882	1.85939914235669
6942	TCF20	7.03129032258065	25.4870588235294	1.85790352783667
773	CACNA1A	11.2258064516129	40.6770588235294	1.8573962775563	activated
54993	ZSCAN2	4.76967741935484	17.2588235294118	1.85537052169779
149111	CNIH3	2.07387096774194	7.50274509803922	1.85509240900398
57648	KIAA1522	8.21612903225806	29.7137254901961	1.85459875669437
79078	C1orf50	11.041935483871	39.933137254902	1.85459334158636
5163	PDK1	3.88838709677419	14.0539215686275	1.85372899797619
64839	FBXL17	2.60903225806452	9.42941176470588	1.85365299227543
79602	ADIPOR2	5.88451612903226	21.2572549019608	1.85295960801707
223082	ZNRF2	1.97354838709677	7.12333333333333	1.85176061076733
89796	NAV1	77.9606451612903	281.315490196078	1.8513710598355	activated
596	BCL2	13.0777419354839	47.1837254901961	1.85117587427466
1845	DUSP3	5.09	18.3576470588235	1.85064359569852
56288	PARD3	18.4296774193548	66.328431372549	1.84759658818145
8434	RECK	1.74612903225806	6.28294117647059	1.84727990047838
10716	TBR1	6.49064516129032	23.3509803921569	1.84704933044778
23005	MAPKBP1	3.58	12.8758823529412	1.84663980746805
10815	CPLX1	1.76	6.32411764705882	1.84528877742473
463	ZFHX3	10.0109677419355	35.9707843137255	1.84524417300423	activated
64221	ROBO3	4.01451612903226	14.4192156862745	1.84469467844892
79837	PIP4K2C	1.27967741935484	4.59588235294118	1.84456168584353
23506	GLTSCR1L	3.26	11.6911764705882	1.84247624446502
128866	CHMP4B	12.7225806451613	45.5549019607843	1.84021496817337
22879	MON1B	1.74612903225806	6.25176470588235	1.8401033089124
641	BLM	5.75129032258064	20.5890196078431	1.83991756317604
55317	AP5S1	9.44064516129032	33.7617647058823	1.83843295481161	repressed
27079	RPUSD2	5.46032258064516	19.5227450980392	1.83809783569325
9807	IP6K1	15.2325806451613	54.3576470588235	1.83532263016251
11176	BAZ2A	25.0029032258065	89.2207843137255	1.83528420653685
833	CARS	13.0267741935484	46.4849019607843	1.83528233785558
93436	ARMC6	17.3216129032258	61.8062745098039	1.83518003351868
54602	NDFIP2	5.86451612903226	20.9225490196078	1.83497464355252
8527	DGKD	9.94838709677419	35.476862745098	1.83434388654261
118460	EXOSC6	3.01225806451613	10.7407843137255	1.83418206747722
55800	SCN3B	15.6658064516129	55.8249019607843	1.83328977305966
11267	SNF8	16.5190322580645	58.8535294117647	1.83299976425944
123096	SLC25A29	14.1416129032258	50.3398039215686	1.83175292283856
56965	PARP6	23.3287096774194	82.9439215686274	1.8300297457846
2175	FANCA	6.78096774193548	24.1090196078431	1.83000989844097
10220	GDF11	1.88096774193548	6.67764705882353	1.82786473577394
80021	TMEM62	3.20741935483871	11.3817647058824	1.82723936345184
53822	FXYD7	4.81967741935484	17.1017647058824	1.82713670703733
3766	KCNJ10	8.34806451612903	29.6211764705882	1.82711528639567
23142	DCUN1D4	11.6706451612903	41.3952941176471	1.82658245277382
80315	CPEB4	14.5116129032258	51.4347058823529	1.82553427764356	activated
997	CDC34	10.9567741935484	38.823137254902	1.82509359136354
23157	SEPT6	8.33838709677419	29.4654901960784	1.82118601375641
84515	MCM8	6.86258064516129	24.25	1.82116164423459
56940	DUSP22	2.38903225806452	8.42803921568627	1.81877069302422
64852	TUT1	7.53645161290323	26.548431372549	1.81666929674497
83698	CALN1	1	3.52176470588235	1.81629852387774
51162	EGFL7	23.6909677419355	83.3850980392157	1.81545244724524
23169	SLC35D1	6.00354838709677	21.1103921568627	1.81406601874987
92305	TMEM129	7.19516129032258	25.2921568627451	1.81359113967992	repressed
143187	VTI1A	5.71064516129032	20.0603921568627	1.81262416053001
84168	ANTXR1	10.1035483870968	35.4152941176471	1.80951046420612
56897	WRNIP1	6.83354838709677	23.9341176470588	1.80836180901942
4905	NSF	10.3035483870968	36.0745098039216	1.80783852542971
5327	PLAT	8.75548387096774	30.5964705882353	1.8051064261324
146198	ZFP90	18.92	66.0374509803922	1.80337234518803
64210	MMS19	12.5948387096774	43.9270588235294	1.80227725875206
23659	PLA2G15	4.88032258064516	17.0021568627451	1.80066936001616
55466	DNAJA4	5.91903225806452	20.611568627451	1.80002107979946
9960	USP3	41.3596774193548	143.977647058824	1.79954800787015
9223	MAGI1	40.328064516129	140.329607843137	1.79896335963517
5865	RAB3B	15.3254838709677	53.3225490196078	1.79881312356191
284307	ZIK1	2.79709677419355	9.73078431372549	1.79862592360385
3897	L1CAM	18.18	63.1801960784314	1.79712021493393
192111	PGAM5	6.97838709677419	24.2439215686274	1.79665754808713
128989	TANGO2	4.20193548387097	14.5572549019608	1.79261241227743
53339	BTBD1	1.92516129032258	6.66039215686274	1.79062780406552
387923	SERP2	2.45548387096774	8.49117647058824	1.78995710998586
91526	ANKRD44	5.33516129032258	18.4392156862745	1.7891735001435
7862	BRPF1	7.59774193548387	26.2349019607843	1.78784478323175
92597	MOB1B	14.2932258064516	49.343137254902	1.7875178938109
54888	NSUN2	4.27645161290323	14.7421568627451	1.78546149306794
50861	STMN3	24.7758064516129	85.2333333333333	1.78248573689779
64750	SMURF2	3.19258064516129	10.9821568627451	1.78236645492224
55048	VPS37C	5.80548387096774	19.9474509803922	1.78071617909643
79728	PALB2	3.23387096774194	11.1066666666667	1.78009187880162
283254	HARBI1	1.31516129032258	4.51607843137255	1.77983080049027
220164	DOK6	20.6196774193548	70.7533333333333	1.77877635492842
55773	TBC1D23	14.4209677419355	49.3376470588235	1.7745209321418
10298	PAK4	1.90064516129032	6.49862745098039	1.77364582961129
84893	FBXO18	27.6977419354839	94.5780392156863	1.77173686723068
3714	JAG2	5.33838709677419	18.228431372549	1.77171459020287
56900	TMEM167B	4.03451612903226	13.7709803921569	1.77116370988656
64412	GZF1	4.56516129032258	15.5558823529412	1.76872249137478
54491	FAM105A	2.35225806451613	8.00627450980392	1.76708473614111
28982	FLVCR1	28.9151612903226	98.2290196078431	1.76432315052022
8828	NRP2	17.8861290322581	60.7380392156863	1.76375914630964
222183	SRRM3	7.14096774193548	24.2292156862745	1.76255619843075
3164	NR4A1	2.75935483870968	9.3621568627451	1.76250994586329
84135	UTP15	3.7241935483871	12.6123529411765	1.75983749013162
114569	MAL2	6.56193548387097	22.2166666666667	1.75944905995161
80790	CMIP	11.5864516129032	39.2266666666667	1.75939594176011
130574	LYPD6	2.43	8.22627450980392	1.75928290137278
4808	NHLH2	12.3929032258065	41.9501960784314	1.7591633536504
2596	GAP43	165.132903225806	558.496470588235	1.75792055343952
55631	LRRC40	13.4270967741935	45.371568627451	1.75664114179827
781	CACNA2D1	18.5316129032258	62.5929411764706	1.75601151646991	activated
283209	PGM2L1	42.8574193548387	144.688235294118	1.75533073370963
7464	CORO2A	1.5041935483871	5.07411764705882	1.75416675553114
2257	FGF12	6.06903225806452	20.4607843137255	1.75332305435118
9943	OXSR1	10.2622580645161	34.5803921568627	1.75260601938772
4026	LPP	25.0558064516129	84.356862745098	1.75136046849452	activated
54938	SARS2	12.9287096774194	43.5182352941176	1.75104175791733
11182	SLC2A6	6.57645161290323	22.1335294117647	1.75085224242855
4355	MPP2	6.07	20.4147058823529	1.74984036100118
4240	MFGE8	5.42741935483871	18.2535294117647	1.74983715397436
28514	DLL1	23.1338709677419	77.7958823529412	1.74968710612682
57661	PHRF1	1.43645161290323	4.82941176470588	1.7493380793588
79734	KCTD17	3.41483870967742	11.4764705882353	1.74878968799805
9788	MTSS1	12.0783870967742	40.5745098039216	1.74814584977647
6990	DYNLT3	4.67548387096774	15.7047058823529	1.74800934052215
84954	MPND	3.90741935483871	13.1127450980392	1.74668173643046
27246	RNF115	7.9641935483871	26.6992156862745	1.74519717462243
140467	ZNF358	22.1116129032258	74.0682352941176	1.74405070028349
23522	KAT6B	102.37	342.783333333333	1.74350397619653
85369	STRIP1	11.9948387096774	40.0576470588235	1.73966392299821
9400	RECQL5	5.74645161290323	19.1601960784314	1.73736904150361
9792	SERTAD2	10.5077419354839	35.0149019607843	1.73651637383918
2017	CTTN	24.2058064516129	80.6360784313726	1.73607231757829
152789	JAKMIP1	2.0258064516129	6.7443137254902	1.73517530412194
64421	DCLRE1C	16.2583870967742	54.1143137254902	1.7348261075755	activated
1277	COL1A1	1.02967741935484	3.42117647058824	1.73230008683379	repressed
4345	CD200	27.9664516129032	92.8254901960784	1.73082381264701
4122	MAN2A2	4.93161290322581	16.3507843137255	1.72922837258895
56131	PCDHB4	1.21387096774194	4.02196078431373	1.72828394096624
6860	SYT4	38.2029032258065	126.393725490196	1.72617066119304
6387	CXCL12	5.09741935483871	16.8627450980392	1.72600046175954
66036	MTMR9	14.9270967741935	49.3650980392157	1.72555779467708
10277	UBE4B	13.6803225806452	45.2109803921569	1.72457095335388
60561	RINT1	4.06451612903226	13.4249019607843	1.72375603432715
54675	CRLS1	10.9690322580645	36.2203921568627	1.72336591667061
6722	SRF	6.7758064516129	22.3556862745098	1.72217726406537
54442	KCTD5	6.4358064516129	21.196862745098	1.71965790893179
23677	SH3BP4	3.96806451612903	13.0535294117647	1.71793254767937
27434	POLM	4.58516129032258	15.0819607843137	1.71777961462205
199731	CADM4	7.30096774193548	24.0082352941176	1.71736975259223
4761	NEUROD2	84.6935483870968	278.32	1.7164206039038
253943	YTHDF3	15.1767741935484	49.8045098039216	1.71441120429228
5613	PRKX	39.0012903225806	127.94568627451	1.71393774717666
92912	UBE2Q2	14.0093548387097	45.9517647058824	1.71372974898103
57007	ACKR3	1	3.27686274509804	1.71231524532089
79971	WLS	3.39290322580645	11.1158823529412	1.71203028426234
55151	TMEM38B	1.09451612903226	3.58352941176471	1.71108798091285
10186	LHFP	10.3012903225806	33.7262745098039	1.71104790506716
10113	PREB	7.67709677419355	25.1101960784314	1.70964055493013
23048	FNBP1	13.8193548387097	45.1725490196078	1.70875606061446
4245	MGAT1	9.43193548387097	30.8129411764706	1.70791064282377
5797	PTPRM	8.00548387096774	26.0247058823529	1.70082134853415
7248	TSC1	13.2332258064516	42.9211764705882	1.69752483690298
54965	PIGX	15.9645161290323	51.776862745098	1.69743872564716	repressed
497661	C18orf32	2.76451612903226	8.9643137254902	1.69716615111767
3757	KCNH2	1.44709677419355	4.69137254901961	1.69684866706285
283459	GATC	10.4377419354839	33.8096078431373	1.69562364446862
192670	AGO4	11.0693548387097	35.7864705882353	1.69284312695475
389206	BEND4	1	3.23039215686275	1.69170931303656
83860	TAF3	17.3183870967742	55.79	1.68770197673926
60686	C14orf93	4.17290322580645	13.43	1.68633593634066
51310	SLC22A17	39.8354838709677	128.149215686275	1.68569864473812
8859	STK19	1.53290322580645	4.92941176470588	1.68514887692248
9703	KIAA0100	12.0564516129032	38.7503921568627	1.68440554683109
27439	CECR6	9.7341935483871	31.2737254901961	1.68381772527366
83939	EIF2A	27.6674193548387	88.8817647058823	1.6836993764631
22877	MLXIP	18.9945161290323	61.0066666666667	1.68338394474605
8522	GAS7	8.66516129032258	27.8058823529412	1.68209160975785
115939	TSR3	2.62225806451613	8.39960784313725	1.67951230098765
64423	INF2	6.88548387096774	22.0460784313725	1.67889210412657
6405	SEMA3F	3.68225806451613	11.7841176470588	1.67818109468035
23759	PPIL2	3.50322580645161	11.2088235294118	1.67787897414435
54776	PPP1R12C	8.93258064516129	28.5725490196078	1.67748080906928
9575	CLOCK	9.41096774193548	30.0996078431373	1.67732970087338
83874	TBC1D10A	4.08225806451613	13.0545098039216	1.67710899360447
57658	CALCOCO1	8.63	27.5843137254902	1.67641562336222
56127	PCDHB9	3.55548387096774	11.361568627451	1.6760442165462
196394	AMN1	9.2258064516129	29.4556862745098	1.67479923457729
1141	CHRNB2	1.30354838709677	4.15941176470588	1.6739353769244
23062	GGA2	6.02870967741935	19.2350980392157	1.6738200221414
9991	PTBP3	10.0535483870968	32.0517647058824	1.67269900226371
56907	SPIRE1	26.7477419354839	85.2037254901961	1.67149940969519
257160	RNF214	13.6206451612903	43.3376470588235	1.66982578669567
126526	C19orf47	3.83096774193548	12.1878431372549	1.66966205421766
9129	PRPF3	16.0909677419355	51.0947058823529	1.66692272062071
7760	ZNF213	4.44451612903226	14.0956862745098	1.66515545224497	repressed
219527	LRRC55	1.26612903225806	4.01156862745098	1.66374203970437
8028	MLLT10	23.9648387096774	75.9078431372549	1.66332972880205
10949	HNRNPA0	52.2229032258065	165.250784313725	1.66190255039081
163033	ZNF579	6.82451612903226	21.5927450980392	1.66174800067361
79753	SNIP1	1.60645161290323	5.0821568627451	1.66156337862732
160	AP2A1	1.65129032258065	5.21098039215686	1.65796103538637
94015	TTYH2	2.00322580645161	6.32078431372549	1.65777853319613	repressed
23274	CLEC16A	6.25709677419355	19.7390196078431	1.6574850137061
56970	ATXN7L3	7.45193548387097	23.5080392156863	1.65746712099829
79786	KLHL36	4.78645161290323	15.0933333333333	1.6568830273865
8321	FZD1	1.40032258064516	4.41509803921569	1.65668626682321
338811	FAM19A2	4.56967741935484	14.3994117647059	1.65584564494206
1105	CHD1	18.1493548387097	57.1833333333333	1.65567645490064
3786	KCNQ3	36.5635483870968	115.148235294118	1.65501430955455
4015	LOX	1.90322580645161	5.99352941176471	1.654959074612	repressed
8315	BRAP	6.95322580645161	21.8860784313725	1.65425912717073
6940	ZNF354A	7.82161290322581	24.6143137254902	1.65395947316481
23060	ZNF609	22.8512903225806	71.7913725490196	1.65153484923627
7988	ZNF212	4.23064516129032	13.283137254902	1.65064633527063
57213	SPRYD7	10.0393548387097	31.47	1.6483106186007
83259	PCDH11Y	6.32290322580645	19.8062745098039	1.64729849605701
149603	RNF187	46.5932258064516	145.931764705882	1.64710182461469
126792	B3GALT6	11.3590322580645	35.5390196078431	1.64556395470423
54704	PDP1	6.71161290322581	20.9960784313725	1.6453884770085
4185	ADAM11	1.5041935483871	4.70549019607843	1.64535480986235
133686	NADK2	12.7651612903226	39.9147058823529	1.64470861380456
399664	MEX3D	8.7158064516129	27.2492156862745	1.64450864084243
114034	TOE1	3.77741935483871	11.801568627451	1.6435057704881
51754	TMEM8B	9.30935483870968	29.0835294117647	1.64344926311841
9666	DZIP3	10.3790322580645	32.3882352941176	1.64179793062403
57185	NIPAL3	1.99612903225806	6.22333333333333	1.64048254044288
81559	TRIM11	1.73096774193548	5.39039215686275	1.63881139532241
256471	MFSD8	3.85548387096774	12.0009803921569	1.63816843052085
57404	CYP20A1	53.8854838709677	167.704509803922	1.63795290047575
375704	ENHO	15.5	48.2394117647059	1.63794409950557
148867	SLC30A7	9.42032258064516	29.308431372549	1.6374673869907
1410	CRYAB	1	3.11	1.63691458035588
83480	PUS3	6.00096774193548	18.6482352941176	1.63577203308082
152185	SPICE1	8.4958064516129	26.376862745098	1.63445017647284
9495	AKAP5	1.34064516129032	4.16137254901961	1.63413201343807
23399	CTDNEP1	24.3506451612903	75.5717647058824	1.633887315641
9448	MAP4K4	104.625161290323	324.591764705882	1.63339655055609
55699	IARS2	10.6354838709677	32.966862745098	1.63213092955948
51430	SUCO	15.9641935483871	49.4725490196078	1.6317885595466
54916	TMEM260	5.14258064516129	15.9329411764706	1.63144819076211
84552	PARD6G	9.43935483870968	29.193137254902	1.62886909639798
92181	UBTD2	14.898064516129	46.0419607843137	1.627824359727
2321	FLT1	1.92516129032258	5.94921568627451	1.62772016343514
57532	NUFIP2	21.988064516129	67.9127450980392	1.62696173104411
84549	MAK16	4.16903225806452	12.8623529411765	1.62537014226741
29915	HCFC2	4.84612903225806	14.9376470588235	1.62404819289154
23064	SETX	22.9909677419355	70.8247058823529	1.6231855118189
10233	LRRC23	1.31774193548387	4.05745098039216	1.62250580225982
83690	CRISPLD1	8.63967741935484	26.5766666666667	1.6211108159488
145482	PTGR2	2.48032258064516	7.62941176470588	1.62104406426286
81037	CLPTM1L	8.21451612903226	25.2507843137255	1.6200806983245
81533	ITFG1	16.0416129032258	49.2880392156863	1.61941838384434
11221	DUSP10	4.74258064516129	14.5692156862745	1.61917900273571
5467	PPARD	2.22129032258065	6.82235294117647	1.61887142649901
7709	ZBTB17	11.6029032258065	35.5958823529412	1.61722452818004
51768	TM7SF3	11.5032258064516	35.266862745098	1.61627475534362
55666	NPLOC4	20.5251612903226	62.8288235294118	1.61403300685371
25782	RAB3GAP2	27.7338709677419	84.8686274509804	1.61358235021648
904	CCNT1	7.36935483870968	22.5223529411765	1.61174732857923
10189	ALYREF	15.1429032258065	46.2676470588235	1.6113619044721
64083	GOLPH3	13.2748387096774	40.5250980392157	1.61012134366789
4093	SMAD9	7.37451612903226	22.5094117647059	1.6099080588461
8450	CUL4B	18.6232258064516	56.8262745098039	1.60945514667285
26033	ATRNL1	1.22258064516129	3.72803921568627	1.60848740305525
23335	WDR7	2.59032258064516	7.89509803921569	1.6078254089548
5420	PODXL	9.25612903225806	28.2035294117647	1.6073948327584
84233	TMEM126A	20.331935483871	61.91	1.6064249012518
55193	PBRM1	40.6361290322581	123.705294117647	1.60607235981394
1840	DTX1	14.3151612903226	43.4592156862745	1.60211821284712
1793	DOCK1	3.90935483870968	11.8647058823529	1.60167389343176
79896	THNSL1	4.89935483870968	14.8676470588235	1.60151265719518
55974	SLC50A1	3.09161290322581	9.36274509803922	1.59857188832443
64168	NECAB1	6.27774193548387	19.0054901960784	1.59809860701124
54778	RNF111	9.56483870967742	28.948431372549	1.59767262911924
59283	CACNG8	9.69967741935484	29.3233333333333	1.59604043759226
1809	DPYSL3	122.825483870968	371.038039215686	1.59495717846641
5137	PDE1C	1.28290322580645	3.87078431372549	1.59321357395797
1174	AP1S1	4.56451612903226	13.7656862745098	1.59254269828587	repressed
55717	WDR11	11.9158064516129	35.8952941176471	1.59091812355008
1520	CTSS	1.56193548387097	4.70470588235294	1.59076967094773
9785	DHX38	26.5141935483871	79.8405882352941	1.59035748158981
55230	USP40	8.49451612903226	25.5596078431373	1.58926202643085
57215	THAP11	10.9845161290323	33.0433333333333	1.5888879097168
55521	TRIM36	35.5945161290323	106.948431372549	1.58718842791179
868	CBLB	7.85806451612903	23.5939215686275	1.58616931250731
4123	MAN2C1	11.6187096774194	34.8582352941176	1.58504967625721
2744	GLS	16.8006451612903	50.3966666666667	1.58481167925545
22926	ATF6	16.7987096774194	50.3752941176471	1.58436593420506
390	RND3	78.3809677419355	234.87137254902	1.58329558963092
4783	NFIL3	18.7541935483871	56.161568627451	1.58237000476404
79885	HDAC11	2.04064516129032	6.10941176470588	1.58200813870694
1846	DUSP4	8.96064516129032	26.8062745098039	1.58089621561497
79178	THTPA	11.2603225806452	33.6701960784314	1.58022396503918
1031	CDKN2C	5.80774193548387	17.3598039215686	1.57970139834337
80725	SRCIN1	9.82290322580645	29.3266666666667	1.57799170952527
55670	PEX26	1.38806451612903	4.14352941176471	1.57778553801944
8786	RGS11	1.09322580645161	3.2578431372549	1.57532571951078
79832	QSER1	31.4348387096774	93.6698039215686	1.57521968442649
604	BCL6	1.23645161290323	3.68313725490196	1.57472937872491
3776	KCNK2	1	2.97352941176471	1.57217634576531
27087	B3GAT1	34.6748387096774	103.062352941176	1.57155635812629
23102	TBC1D2B	1.35516129032258	4.0278431372549	1.57154292893063
114294	LACTB	10.6764516129032	31.7250980392157	1.57119238464653
150094	SIK1	1.21387096774194	3.60627450980392	1.57089414506568
51729	WBP11	28.3832258064516	84.2805882352941	1.57016181976828
158427	TSTD2	4.15935483870968	12.3441176470588	1.56939204376086
256435	ST6GALNAC3	7.61806451612903	22.598431372549	1.5687262231518
3915	LAMC1	4.43709677419355	13.1594117647059	1.56840707684036
481	ATP1B1	16.7254838709677	49.5701960784314	1.56742501662965
221935	SDK1	13.02	38.571568627451	1.56680837013689
953	ENTPD1	13.8135483870968	40.8394117647059	1.56387812351835
3176	HNMT	1	2.95647058823529	1.56387592485559
7064	THOP1	17.5112903225806	51.7643137254902	1.56367245490558
388228	SBK1	66.0712903225807	195.309215686275	1.56366459969947
6622	SNCA	27.7206451612903	81.8849019607843	1.56263663581396
23085	ERC1	26.5461290322581	78.3801960784314	1.56198768007069
253558	LCLAT1	11.081935483871	32.6372549019608	1.55830984509589
256714	MAP7D2	15.6370967741935	46.0452941176471	1.55808103591508
3098	HK1	26.4464516129032	77.8739215686275	1.55806611392433
5900	RALGDS	15.2622580645161	44.9117647058824	1.55712498469393
23271	CAMSAP2	26.8067741935484	78.8758823529412	1.55698661669492
90410	IFT20	3.24612903225806	9.54509803921569	1.55603966831064
54495	TMX3	9.19516129032258	27.0305882352941	1.55564612193916
56853	CELF4	30.1364516129032	88.5374509803922	1.55477828019813
56254	RNF20	39.2003225806452	115.154509803922	1.55463348111816
27075	TSPAN13	59.5341935483871	174.874117647059	1.55452635255723
4216	MAP3K4	24.1996774193548	71.0586274509804	1.55402200566927
9927	MFN2	14.3790322580645	42.1874509803922	1.552847338365
65997	RASL11B	10.6558064516129	31.2292156862745	1.55125655375283
22808	MRAS	14.7648387096774	43.2582352941176	1.55080921558417
25962	KIAA1429	16.7383870967742	49.0207843137255	1.55023304979617
27183	VPS4A	24.8990322580645	72.91	1.55002703087242
9823	ARMCX2	20.088064516129	58.7833333333333	1.54906860274805
5424	POLD1	26.4793548387097	77.4505882352941	1.54840822453455
440	ASNS	26.7225806451613	78.1454901960784	1.5481032791265
57584	ARHGAP21	72.8306451612903	212.953725490196	1.54792243888911
3475	IFRD1	14.948064516129	43.6923529411765	1.54742210502346
55573	CDV3	28.4206451612903	83.0158823529412	1.54644807023993
153090	DAB2IP	13.8441935483871	40.3409803921569	1.54296512935176
23252	OTUD3	7.64677419354839	22.2782352941176	1.54271178072999
25759	SHC2	8.42258064516129	24.5333333333333	1.54240902340989
6014	RIT2	1.02967741935484	2.99843137254902	1.54201551702768
59339	PLEKHA2	4.21483870967742	12.2692156862745	1.54149369783217
29106	SCG3	78.9241935483871	229.659215686275	1.54095515750099
4860	PNP	9.93838709677419	28.9013725490196	1.54005436850755	repressed
50485	SMARCAL1	3.34225806451613	9.7178431372549	1.53981301308753
26091	HERC4	7.76096774193548	22.5535294117647	1.53904475575006
317762	CCDC85C	11.4777419354839	33.3298039215686	1.53797398767596
81794	ADAMTS10	4.35483870967742	12.6450980392157	1.53788703068458
23390	ZDHHC17	19.3312903225806	56.0809803921569	1.53657363277024
2686	GGT7	4.28322580645161	12.4225490196078	1.53619159332732
54681	P4HTM	10.188064516129	29.5454901960784	1.53605793454878
3267	AGFG1	18.5690322580645	53.8309803921569	1.53553807068379
51429	SNX9	2.21451612903226	6.41764705882353	1.53505294531304	repressed
54521	WDR44	4.60096774193548	13.3282352941176	1.53447652846213
60685	ZFAND3	22.7358064516129	65.8533333333333	1.53429028981519
23164	MPRIP	28.851935483871	83.5072549019608	1.53323343787455
54487	DGCR8	15.1803225806452	43.9362745098039	1.53321009621802
81537	SGPP1	5.83387096774194	16.8807843137255	1.53285655349615
7328	UBE2H	36.2293548387097	104.832352941176	1.53285300430283
23122	CLASP2	49.4367741935484	142.938235294118	1.53173536816639
7423	VEGFB	14.1264516129032	40.7309803921569	1.52772741602289
8760	CDS2	25.9935483870968	74.9349019607843	1.52748424028108
5526	PPP2R5B	3.22677419354839	9.29627450980392	1.52656004773916
6619	SNAPC3	20.3570967741935	58.6429411764706	1.52642563593367
283464	GXYLT1	6.18451612903226	17.8025490196078	1.52535119559135	activated
55188	RIC8B	7.19032258064516	20.6945098039216	1.52511967439312
4335	MNT	9.39483870967742	26.9921568627451	1.52259996404516
10742	RAI2	1.30354838709677	3.73843137254902	1.51998891329942
254065	BRWD3	14.548064516129	41.7196078431373	1.51989836802277
10640	EXOC5	33.788064516129	96.8482352941176	1.51921205033654
84826	SFT2D3	4.96516129032258	14.2311764705882	1.51914244356673
4943	TBC1D25	9.18	26.3029411764706	1.51865807093554
26608	TBL2	6.24129032258065	17.866862745098	1.5173701053912
60312	AFAP1	8.33225806451613	23.83	1.51599952357178
22884	WDR37	4.46483870967742	12.7635294117647	1.51534735821346
23528	ZNF281	38.8761290322581	111.120784313725	1.51517220790472
51193	ZNF639	11.3093548387097	32.3158823529412	1.51472675280856
84928	TMEM209	9.23774193548387	26.3929411764706	1.51453998177021
60677	CELF6	2.63677419354839	7.52725490196078	1.51334979966976
6857	SYT1	154.245483870968	440.065294117647	1.5124893480846
9969	MED13	36.6558064516129	104.540392156863	1.51194682509378
4603	MYBL1	1.88096774193548	5.36313725490196	1.51160206842562
11083	DIDO1	16.6154838709677	47.366862745098	1.51134981353677
11341	SCRG1	2.04612903225806	5.83254901960784	1.51122940070717
726	CAPN5	1.27967741935484	3.64725490196078	1.51103084931738
9135	RABEP1	47.9093548387097	136.372352941176	1.50917190239079
9554	SEC22B	5.95096774193548	16.9392156862745	1.50917087444525
121457	IKBIP	5.2358064516129	14.8882352941176	1.50768908880045
127829	ARL8A	17.341935483871	49.2494117647059	1.50584157049582
163882	CNST	8.31774193548387	23.5723529411765	1.50283194243004
197407	ZNF48	10.3883870967742	29.4052941176471	1.50110424221196
23276	KLHL18	5.58548387096774	15.8090196078431	1.5009937300845
23023	TMCC1	13.8029032258065	39.0574509803922	1.50062604984119
51466	EVL	81.0922580645161	229.236862745098	1.49920296627647
3486	IGFBP3	2.6041935483871	7.36019607843137	1.49890752454053
4775	NFATC3	13.0725806451613	36.9247058823529	1.49804245924342
285193	DUSP28	7.01612903225806	19.808431372549	1.49736745243099
57611	ISLR2	6.27258064516129	17.7088235294118	1.4973373517861
3416	IDE	9.17096774193548	25.8809803921569	1.49674638528718
57498	KIDINS220	108.82	306.849019607843	1.49558524051688
81855	SFXN3	6.29838709677419	17.7570588235294	1.49533830894976
1398	CRK	32.8522580645161	92.6166666666667	1.49527929841173
6252	RTN1	168.303870967742	474.242941176471	1.49455794128783
54799	MBTD1	10.8287096774194	30.5076470588235	1.49430956934054
8936	WASF1	34.318064516129	96.6174509803921	1.4933156017829
280	AMY2B	2.27096774193548	6.39352941176471	1.49330534678632
10938	EHD1	11.5709677419355	32.5721568627451	1.49312972546626	repressed
8898	MTMR2	7.30258064516129	20.5252941176471	1.49092460479877
2782	GNB1	91.3561290322581	256.588039215686	1.48988049431703
22904	SBNO2	3.30483870967742	9.27764705882353	1.48917910034574
8976	WASL	15.951935483871	44.7625490196078	1.48856071343276
55075	UACA	20.06	56.2829411764706	1.48837611547861
23312	DMXL2	27.2403225806452	76.4045098039216	1.48791400848741
2768	GNA12	11.3370967741935	31.7841176470588	1.48725479917745	repressed
90411	MCFD2	17.6825806451613	49.541568627451	1.48631070811478
1122	CHML	9.96064516129032	27.9062745098039	1.48627844205665
27005	USP21	8.39	23.4935294117647	1.48552074863061
83696	TRAPPC9	11.7077419354839	32.7686274509804	1.48485239429938
10991	SLC38A3	5.06161290322581	14.1649019607843	1.48465153261084
23514	SPIDR	27.6896774193548	77.4774509803921	1.48442824322255
10982	MAPRE2	42.2870967741936	118.171764705882	1.48259594680986
166378	SPATA5	8.7258064516129	24.3721568627451	1.4818735523402
54540	FAM193B	16.8690322580645	47.1094117647059	1.48163810626492
84134	TOMM40L	8.57774193548387	23.9543137254902	1.48161566411901
6804	STX1A	15.4148387096774	43.0466666666667	1.4815817322136
205564	SENP5	17.7154838709677	49.4586274509804	1.48121133242063
55810	FOXJ2	5.68645161290323	15.8701960784314	1.48071936674822
4782	NFIC	13.2341935483871	36.9288235294118	1.48047701815255
87178	PNPT1	16.3129032258065	45.5056862745098	1.48003326910316
3096	HIVEP1	9.64838709677419	26.9129411764706	1.47994036933311
9605	VPS9D1	4.00129032258065	11.146862745098	1.47810050902505
1108	CHD4	111.903870967742	311.545490196078	1.47718289045393
9362	CPNE6	9.47387096774194	26.3656862745098	1.47663562128529
55783	CMTR2	10.6751612903226	29.6927450980392	1.47585260923265
6659	SOX4	1596.88387096774	4439.61980392157	1.47517673317943
9092	SART1	13.6103225806452	37.7233333333333	1.47075590117291
79856	SNX22	1.52290322580645	4.21980392156863	1.47035169643019
80820	EEPD1	4.28903225806452	11.8833333333333	1.47021550422662
10472	ZBTB18	93.8235483870968	259.905098039216	1.46996296314999
729993	SHISA9	74.2635483870968	205.66137254902	1.46954469602439
22871	NLGN1	16.0403225806452	44.4076470588235	1.46910497650894
5423	POLB	33.5609677419355	92.896862745098	1.4688455586532
84705	GTPBP3	3.69290322580645	10.2180392156863	1.46829101608462
23074	UHRF1BP1L	10.7961290322581	29.8592156862745	1.46766214591652
1641	DCX	116.352580645161	321.673921568627	1.46709577058872
1121	CHM	12.2258064516129	33.7978431372549	1.46700154868537
51479	ANKFY1	8.09806451612903	22.383137254902	1.46676321892071
2671	GFER	7.41193548387097	20.4849019607843	1.46663875940321
896	CCND3	5.46935483870968	15.0856862745098	1.46373775985885	repressed
23373	CRTC1	11.7922580645161	32.5098039215686	1.46303485247223
5754	PTK7	7.10354838709677	19.5819607843137	1.46291346296509
2783	GNB2	65.331935483871	179.987843137255	1.46203918046078	repressed
9344	TAOK2	7.21709677419355	19.8564705882353	1.4601187069911
1113	CHGA	18.98	52.2178431372549	1.46006287587293
127687	C1orf122	36.4470967741935	100.172941176471	1.45861705371864	repressed
6314	ATXN7	12.9709677419355	35.6366666666667	1.4580762777146	activated
5195	PEX14	9.18451612903226	25.2258823529412	1.45762911045651
64428	NARFL	13.2716129032258	36.4349019607843	1.4569773961511
207	AKT1	30.0396774193548	82.4156862745098	1.45604963281205
57482	KIAA1211	20.3835483870968	55.9041176470588	1.45554933037762
2054	STX2	8.96903225806452	24.5964705882353	1.45542707980168
5452	POU2F2	20.5793548387097	56.4123529411765	1.45481335799059	activated
6664	SOX11	435.61935483871	1193.92607843137	1.45457355491593
51	ACOX1	13.7574193548387	37.6645098039216	1.45299588136384
25	ABL1	19.7625806451613	54.0049019607843	1.45031901513314
10290	SPEG	6.3958064516129	17.4480392156863	1.44786673155854
11104	KATNA1	11.0464516129032	30.1337254901961	1.44779603157398
78987	CRELD1	15.7396774193548	42.9280392156863	1.44751430416045
4139	MARK1	24.6070967741935	67.083137254902	1.4468757065678
57144	PAK7	24.9758064516129	68.0641176470588	1.44636316967384
22992	KDM2A	20.31	55.3319607843137	1.44592280946175
6416	MAP2K4	15.3825806451613	41.8635294117647	1.44439639073767
9745	ZNF536	5.00322580645161	13.6056862745098	1.443279257478
84898	PLXDC2	7.73129032258064	21.0188235294118	1.44290080108609
26523	AGO1	19.7477419354839	53.6666666666667	1.44233858540491
7597	ZBTB25	1.93258064516129	5.24705882352941	1.44098034577907
25837	RAB26	5.00741935483871	13.5947058823529	1.44090575285761
5893	RAD52	4.63290322580645	12.5745098039216	1.44051370796439
55222	LRRC20	7.82290322580645	21.2203921568627	1.43967529462376
8738	CRADD	3.80193548387097	10.3113725490196	1.43943042713303	repressed
950	SCARB2	43.5945161290323	118.146470588235	1.43835796100048
4613	MYCN	19.5067741935484	52.8545098039216	1.43805135329759
51082	POLR1D	53.568064516129	145.05568627451	1.43716177553827
10560	SLC19A2	1.90903225806452	5.16411764705882	1.43568038694333
10243	GPHN	14.7129032258065	39.7841176470588	1.43511064780935
26751	SH3YL1	9.49806451612903	25.6633333333333	1.43400310899847
6326	SCN2A	5.62161290322581	15.1788235294118	1.43300395540528	activated
3398	ID2	114.566774193548	309.236862745098	1.43252360171135
6521	SLC4A1	1.10612903225807	2.98529411764706	1.4323533871608
7107	GPR137B	3.19935483870968	8.62745098039216	1.43115336170129
65124	SOWAHC	8.15677419354839	21.9913725490196	1.43086703084062
256643	CXorf23	12.6351612903226	34.0392156862745	1.42975371489903
79834	PEAK1	1.44	3.87901960784314	1.42962325682008	activated
3780	KCNN1	7.15548387096774	19.2707843137255	1.42929405611855
142891	SAMD8	18.5803225806452	49.9986274509804	1.42811294178875
56926	NCLN	15.3470967741935	41.281568627451	1.42753202636533
310	ANXA7	9.2	24.7405882352941	1.42717403613599
84193	SETD3	7.83064516129032	21.0160784313725	1.42429040954377
653121	ZBTB8A	18.4290322580645	49.4141176470588	1.42294296523427
23654	PLXNB2	55.5706451612903	148.794705882353	1.42092830142322
26053	AUTS2	123.509032258065	330.614117647059	1.4205317804219	activated
122553	TRAPPC6B	16.8570967741935	45.1176470588235	1.42033574289864
6687	SPG7	25.0806451612903	66.9811764705882	1.41718125630355
10014	HDAC5	32.6229032258064	87.1074509803922	1.41691095085263
84957	RELT	5.18483870967742	13.8403921568627	1.41651380581604
9715	FAM131B	15.0596774193548	40.1949019607843	1.41632166410786
80218	NAA50	22.6022580645161	60.3219607843137	1.41621641323474
57117	INTS12	15.6390322580645	41.6998039215686	1.41488935836232
4762	NEUROG1	29.4083870967742	78.3592156862745	1.41387529566872
84446	BRSK1	2.58451612903226	6.88627450980392	1.41382948702539
3801	KIFC3	1	2.66372549019608	1.41344541336312
27	ABL2	26.208064516129	69.7986274509804	1.41318785339929
1268	CNR1	14.8267741935484	39.4829411764706	1.41302471341349
2026	ENO2	50.8293548387097	135.200588235294	1.41136760422718
51299	NRN1	36.041935483871	95.8335294117647	1.41085401479215
23235	SIK2	3.51741935483871	9.35156862745098	1.41069103560077
7553	ZNF7	7.71806451612903	20.5145098039216	1.41033367262826
10325	RRAGB	7.62709677419355	20.2725490196078	1.41032159087424
9988	DMTF1	11.9512903225806	31.76	1.41004452511219
55565	ZNF821	19.8490322580645	52.7194117647059	1.40926560274671
9236	CCPG1	3.7341935483871	9.91098039215686	1.40823106919947
728215	FAM155A	2.75064516129032	7.29941176470588	1.40801016556555
83641	FAM107B	17.2616129032258	45.7925490196078	1.40754559974225
22800	RRAS2	7.8258064516129	20.7596078431373	1.407467855938
85365	ALG2	4.29935483870968	11.4001960784314	1.40686654801623
4915	NTRK2	1.35967741935484	3.60294117647059	1.40591068208439
441024	MTHFD2L	3.35806451612903	8.89254901960784	1.40496707404803
59277	NTN4	5.33677419354839	14.1221568627451	1.40392057152663
2935	GSPT1	42.4845161290323	112.349411764706	1.40298353218605
11075	STMN2	441.540322580645	1167.62784313725	1.40296341915724
65264	UBE2Z	6.8158064516129	18.0170588235294	1.40240724602389
90	ACVR1	15.0638709677419	39.7864705882353	1.40118537744271
4354	MPP1	5.18322580645161	13.686862745098	1.40086964397198
10129	FRY	3.12354838709677	8.24490196078431	1.40031645987605	activated
9712	USP6NL	8.31774193548387	21.9505882352941	1.39999577180823
9125	RQCD1	19.3729032258064	51.0939215686275	1.39911149733172
4644	MYO5A	25.8161290322581	68.0688235294118	1.39872148133526	activated
3621	ING1	13.6141935483871	35.8507843137255	1.3968931560605
4885	NPTX2	5.06935483870968	13.3488235294118	1.39683854197421
23499	MACF1	72.5925806451613	191.080980392157	1.39629017445141	activated
10900	RUNDC3A	35.8874193548387	94.4349019607843	1.39584197676557
55728	N4BP2	26.8435483870968	70.5423529411765	1.39391430698771
607	BCL9	7.80903225806452	20.5105882352941	1.3931531911479
8559	PRPF18	13.171935483871	34.5947058823529	1.39308392464214
55219	TMEM57	15.7548387096774	41.3596078431373	1.39242752177861
84298	LLPH	34.5451612903226	90.6752941176471	1.39222587201315
160851	DGKH	7.56032258064516	19.8437254901961	1.39216320766725
94030	LRRC4B	9.87774193548387	25.9235294117647	1.39200896758161
56899	ANKS1B	12.3561290322581	32.4252941176471	1.39189281878587
150	ADRA2A	1.16322580645161	3.04862745098039	1.39002867932223
90459	ERI1	14.2070967741935	37.1878431372549	1.38821930591041
3726	JUNB	2.42483870967742	6.34372549019608	1.3874415548211
1408	CRY2	6.50806451612903	17.0249019607843	1.38734603238666
7325	UBE2E2	2.96677419354839	7.76	1.38716152749685
54795	TRPM4	2.37903225806452	6.22196078431373	1.38699446804076
4916	NTRK3	39.5509677419355	103.405098039216	1.38652241418614
4292	MLH1	23.6774193548387	61.8656862745098	1.38562759470103
23543	RBFOX2	108.51	283.29862745098	1.38449560821518
10777	ARPP21	38.0387096774194	99.2550980392157	1.38367289636501
663	BNIP2	20.2396774193548	52.7345098039216	1.38156108337413
55113	XKR8	12.9735483870968	33.7825490196078	1.38070506480122
5058	PAK1	39.1564516129032	101.949803921569	1.38053706277688
4004	LMO1	4.80741935483871	12.5160784313725	1.38044804283437	repressed
4760	NEUROD1	103.506774193548	269.383333333333	1.37993540377101
7163	TPD52	2.86516129032258	7.45529411764706	1.37964891336327
400954	EML6	3.70838709677419	9.64882352941176	1.37956120056649	activated
22902	RUFY3	76.4693548387097	198.870980392157	1.37887916347047
9208	LRRFIP1	45.0187096774194	117.032156862745	1.37830838072912
26575	RGS17	6.13451612903226	15.9286274509804	1.37660049874361	activated
90550	MCU	8.69774193548387	22.578431372549	1.37623244956304
1501	CTNND2	37.6229032258065	97.6260784313725	1.37565539933717
8831	SYNGAP1	3.26064516129032	8.45745098039216	1.375065461362
57060	PCBP4	35.8141935483871	92.883137254902	1.37488524571476
55625	ZDHHC7	12.7816129032258	33.1029411764706	1.37288950481696
8470	SORBS2	36.6764516129032	94.9792156862745	1.37275777556043
58506	SCAF1	5.34741935483871	13.8060784313725	1.36838886008323
10227	MFSD10	36.9051612903226	95.2480392156863	1.36786679812386
55139	ANKZF1	12.9293548387097	33.3662745098039	1.36774032434374
146330	FBXL16	6.17516129032258	15.9288235294118	1.36709099191529
221895	JAZF1	9.58322580645161	24.7147058823529	1.36678646984719
4313	MMP2	1.46258064516129	3.77078431372549	1.36634845609429
1955	MEGF9	28.6135483870968	73.7617647058824	1.36617475336753
22924	MAPRE3	11.7425806451613	30.2688235294118	1.36608310073922
1831	TSC22D3	8.02645161290323	20.6813725490196	1.36549769778234
23230	VPS13A	14.9577419354839	38.5186274509804	1.36466389779582
10585	POMT1	13.1187096774194	33.771568627451	1.36418336428533
441631	TSPAN11	7.1358064516129	18.3641176470588	1.36374118971557
26270	FBXO6	1.38129032258064	3.5543137254902	1.36355444785997
3703	STT3A	11.1090322580645	28.5654901960784	1.36254014279803
80014	WWC2	7.98032258064516	20.5190196078431	1.36244283172052
8165	AKAP1	29.4851612903226	75.76	1.36144724476544
2539	G6PD	5.92451612903226	15.221568627451	1.36134780527391
55108	BSDC1	31.2096774193548	80.1401960784314	1.3605325938469
7844	RNF103	12.3361290322581	31.668431372549	1.36015564774079
28511	NKIRAS2	39.3490322580645	100.936274509804	1.35904468388609	repressed
2566	GABRG2	1.27967741935484	3.28039215686274	1.35808811119581
90139	TSPAN18	34.2038709677419	87.6633333333333	1.35781392828866
5770	PTPN1	14.0741935483871	36.0535294117647	1.35708823885484
54821	ERCC6L	2.09096774193548	5.35509803921569	1.35674218240483
257415	FAM133B	2.8341935483871	7.25705882352941	1.35644668020597
2039	DMTN	3.63096774193548	9.29607843137255	1.35626812779261
25777	SUN2	25.9812903225806	66.5082352941177	1.35605990958377
347252	IGFBPL1	118.612580645161	303.317254901961	1.35457053386221
201595	STT3B	29.0290322580645	74.223137254902	1.35437250440218
10318	TNIP1	14.1229032258065	36.1003921568627	1.35397781719285
116092	DNTTIP1	6.47064516129032	16.5286274509804	1.35298545751552
5198	PFAS	12.3387096774194	31.5021568627451	1.35225907689913
11189	CELF3	3.6658064516129	9.35470588235294	1.35156167894092
9859	CEP170	59.7693548387097	152.355294117647	1.34996175713384
92126	DSEL	3.83451612903226	9.76529411764706	1.34861895880068
11079	RER1	11.1412903225806	28.3676470588235	1.34833016460264
54851	ANKRD49	18.8251612903226	47.9056862745098	1.34753468441731
9143	SYNGR3	4.6	11.7033333333333	1.34721372921522
81558	FAM117A	1.95935483870968	4.98294117647059	1.34661885012755
84445	LZTS2	2.63064516129032	6.68960784313725	1.34650497852568
23411	SIRT1	16.9287096774194	43.0488235294118	1.3465017972905
4205	MEF2A	19.5316129032258	49.666862745098	1.34647252982298
63922	CHTF18	7.30483870967742	18.5635294117647	1.34554670666163
51517	NCKIPSD	4.64064516129032	11.7907843137255	1.34526239473438
50804	MYEF2	51.8590322580645	131.732156862745	1.34494037246248
5063	PAK3	34.4661290322581	87.5241176470588	1.34450133704137
130074	FAM168B	41.84	106.141764705882	1.34303768351534
10128	LRPPRC	32.8883870967742	83.4323529411765	1.34302867489792
1912	PHC2	60.561935483871	153.608823529412	1.3427778711773
157638	FAM84B	5.14064516129032	13.0339215686275	1.34224988168427
5297	PI4KA	12.6493548387097	32.0703921568627	1.34217819085869
10213	PSMD14	115.001612903226	291.241764705882	1.34056316081558
29803	REPIN1	30.9203225806452	78.2358823529412	1.33927507107956
116442	RAB39B	6.27967741935484	15.8856862745098	1.3389650606363
51611	DPH5	16.5303225806452	41.8139215686274	1.33886847625854
8464	SUPT3H	7.08322580645161	17.9078431372549	1.33811314633437
51548	SIRT6	25.85	65.3445098039216	1.3379017464309
57606	SLAIN2	16.9651612903226	42.8390196078431	1.33635031764488
54819	ZCCHC10	39.9145161290323	100.659215686275	1.33449383487206
9147	NEMF	74.3025806451613	187.340784313725	1.33418078640812
79650	USB1	17.9438709677419	45.1286274509804	1.3305517495443	repressed
1209	CLPTM1	5.39903225806452	13.5772549019608	1.33041907809369
7532	YWHAG	86.6196774193548	217.816470588235	1.33034634540432
9321	TRIP11	20.6825806451613	51.9864705882353	1.32972000508738	activated
5073	PARN	12.4683870967742	31.3392156862745	1.32969422346891
154091	SLC2A12	5.22032258064516	13.1188235294118	1.32942748420754
8971	H1FX	112.565483870968	282.865490196078	1.32935165817503
6827	SUPT4H1	35.4622580645161	89.0927450980392	1.32902355360086
8507	ENC1	90.3990322580645	226.98137254902	1.32819467271626
23413	NCS1	27.0816129032258	67.9603921568628	1.32738051318342
113878	DTX2	4.93806451612903	12.3911764705882	1.32729557891765	repressed
9545	RAB3D	10.3603225806452	25.9964705882353	1.32724684529923
80263	TRIM45	5.09645161290323	12.7862745098039	1.32703094245028
25921	ZDHHC5	3.67774193548387	9.22647058823529	1.32695862728168
9529	BAG5	25.6138709677419	64.2123529411765	1.32592556379558
221981	THSD7A	74.1677419354839	185.913529411765	1.32576801134512	activated
57476	GRAMD1B	8.97612903225806	22.4962745098039	1.32552078403909
23077	MYCBP2	41.7445161290323	104.50862745098	1.32396345337271	activated
81573	ANKRD13C	11.0451612903226	27.6345098039216	1.32305653522428
65084	TMEM135	15.521935483871	38.8345098039216	1.3230307919972
351	APP	11.048064516129	27.6370588235294	1.32281044069016
58986	TMEM8A	10.7096774193548	26.7696078431373	1.32168097854272
5789	PTPRD	25.0374193548387	62.4511764705882	1.3186428807866	activated
127933	UHMK1	5.74161290322581	14.3113725490196	1.31763406893279
221079	ARL5B	2.80387096774194	6.98823529411765	1.31750822564338
64753	CCDC136	13.5890322580645	33.8511764705882	1.31676325604291
2936	GSR	4.47258064516129	11.1407843137255	1.31667140143126
64778	FNDC3B	2.84935483870968	7.09294117647059	1.31574868701969
53616	ADAM22	7.40709677419355	18.4235294117647	1.31456937492529	activated
55830	GLT8D1	16.3238709677419	40.5833333333333	1.3139041545225
1946	EFNA5	12.8351612903226	31.9052941176471	1.31369440815877
165	AEBP1	6.39161290322581	15.8801960784314	1.31297678431888
6711	SPTBN1	37.0138709677419	91.9270588235294	1.31242355998089	activated
23179	RGL1	14.9729032258065	37.1862745098039	1.31241623428634
23013	SPEN	45.0977419354839	111.963725490196	1.31190429317268	activated
6861	SYT5	3.93322580645161	9.76333333333333	1.31166077361816
131566	DCBLD2	13.5222580645161	33.5633333333333	1.31154991822905
60412	EXOC4	19.1496774193548	47.4986274509804	1.31056573522806
80856	KIAA1715	15.1690322580645	37.6229411764706	1.31048358746892
79603	CERS4	7.33741935483871	18.1927450980392	1.31001860040855	activated
202052	DNAJC18	21.2741935483871	52.7352941176471	1.30966439275337
79053	ALG8	23.8003225806452	58.9488235294118	1.30848189350652
3727	JUND	33.6893548387097	83.4276470588235	1.30823275643122
4430	MYO1B	26.4658064516129	65.5370588235294	1.30818131331112
1114	CHGB	16.8958064516129	41.7613725490196	1.30550391574377
54665	RSBN1	76.1458064516129	188.139215686275	1.3049641041327
25855	BRMS1	36.9338709677419	91.251568627451	1.3049048826752
81929	SEH1L	21.7264516129032	53.6429411764706	1.30393576932967
56265	CPXM1	10.8690322580645	26.83	1.30362356121057
23400	ATP13A2	14.0516129032258	34.6556862745098	1.30235634936225
133746	JMY	10.8103225806452	26.6580392156863	1.30216109566269
26153	KIF26A	4.98612903225806	12.288431372549	1.30130864352548
29916	SNX11	5.52548387096774	13.6052941176471	1.29999543184829
9731	CEP104	2.71290322580645	6.67980392156863	1.29996816958483
4137	MAPT	68.0838709677419	167.497254901961	1.29875248140913
125228	FAM210A	3.93806451612903	9.68372549019608	1.29807543638696
2530	FUT8	19.6254838709677	48.2450980392157	1.29765413983951
4239	MFAP4	6.35516129032258	15.6174509803922	1.29715835604637
162	AP1B1	33.3116129032258	81.7590196078431	1.29535268762915
283638	CEP170B	3.29677419354839	8.08137254901961	1.29354526700395
10229	COQ7	20.8454838709677	51.0723529411765	1.29280766585235
1838	DTNB	8.66322580645161	21.2109803921569	1.29183507852986
8703	B4GALT3	31.0061290322581	75.8601960784314	1.29078967704147
1399	CRKL	36.1403225806452	88.4160784313726	1.2906993635955
7805	LAPTM5	1.56645161290323	3.83137254901961	1.29036110901545
114791	TUBGCP5	8.32870967741935	20.3629411764706	1.28978104705815
9649	RALGPS1	12.1664516129032	29.7403921568627	1.28951520842413
6709	SPTAN1	118.482580645161	289.465882352941	1.28871834709455	activated
55627	SMPD4	6.61258064516129	16.1449019607843	1.28779336312871
26229	B3GAT3	8.52967741935484	20.8182352941176	1.28728469348751
130872	AHSA2	2.2541935483871	5.5	1.28682022588214
9108	MTMR7	4.24741935483871	10.3603921568627	1.2864201517642
8417	STX7	24.6622580645161	60.1450980392157	1.28614226104755
27125	AFF4	38.291935483871	93.2703921568627	1.28437859951759
1362	CPD	8.29548387096774	20.1841176470588	1.2828224801315
11269	DDX19B	13.4683870967742	32.77	1.28279858130912
55010	PARPBP	13.92	33.7766666666667	1.278867748073
51660	MPC1	26.7541935483871	64.9043137254902	1.27854932459074
5128	CDK17	21.9335483870968	53.2	1.27828701710061
1889	ECE1	10.6741935483871	25.8735294117647	1.27734978952782
23518	R3HDM1	24.2970967741935	58.8827450980392	1.27706099249015
55681	SCYL2	8.01290322580645	19.4119607843137	1.27654889265281
5577	PRKAR2B	20.6012903225806	49.8964705882353	1.27620306987951
4154	MBNL1	12.2774193548387	29.7358823529412	1.27619753933185
5136	PDE1A	28.798064516129	69.7370588235294	1.27595366630538
6872	TAF1	13.9851612903226	33.8643137254902	1.27586886677815
134218	DNAJC21	12.3554838709677	29.9117647058824	1.27556151648037
57704	GBA2	11.8296774193548	28.6321568627451	1.27522561905969
780776	TVP23A	5.9541935483871	14.4027450980392	1.27436578499308
3454	IFNAR1	20.71	50.0905882352941	1.27421200032445
254170	FBXO33	12.0529032258065	29.1401960784314	1.2736298896187
56034	PDGFC	17.6929032258065	42.7456862745098	1.27260803720676
56967	C14orf132	66.8861290322581	161.459803921569	1.27139608652698
8496	PPFIBP1	7.56935483870968	18.2682352941176	1.27109503193457
79912	PYROXD1	2.45741935483871	5.93078431372549	1.27107883349938
79955	PDZD7	2.71	6.54	1.27099778414421
8603	FAM193A	26.251935483871	63.3501960784314	1.27092529204695
6293	VPS52	8.04096774193548	19.3954901960784	1.27028019122072
28964	GIT1	25.25	60.863137254902	1.26928531314936
57084	SLC17A6	6.48516129032258	15.6164705882353	1.2678540721487
200942	KLHDC8B	7.41645161290323	17.856862745098	1.26767763468202
2760	GM2A	1.97354838709677	4.75117647058824	1.26749290165279
7528	YY1	38.6922580645161	93.1158823529412	1.2669823363734
10114	HIPK3	6.40741935483871	15.4090196078431	1.26595975325647
9796	PHYHIP	7.92129032258064	19.0456862745098	1.26565691411309
26578	OSTF1	2.57677419354839	6.19117647058824	1.26464746453368
222255	ATXN7L1	9.58870967741935	23.0282352941176	1.26399526390324
57643	ZSWIM5	5.15129032258065	12.3639215686275	1.26313065090658
100506658	OCLN	5.79645161290323	13.9096078431373	1.26283983862705
6575	SLC20A2	3.07774193548387	7.38294117647059	1.2623233951997
55787	TXLNG	12.2138709677419	29.2917647058824	1.26197460299447
9821	RB1CC1	60.7983870967742	145.79431372549	1.26182949628354
64062	RBM26	57.3474193548387	137.35862745098	1.26014705721515
55750	AGK	18.6429032258065	44.6507843137255	1.26005897144798
10274	STAG1	5.65	13.5317647058824	1.26002722383642
27319	BHLHE22	31.2435483870968	74.803137254902	1.25954046592332
219287	AMER2	33.5761290322581	80.2286274509804	1.25668120329467
9401	RECQL4	12.5	29.8356862745098	1.25511086697093
94097	SFXN5	16.1896774193548	38.6364705882353	1.25488907100406
8500	PPFIA1	42.3274193548387	101.007647058824	1.25480008296959
79934	ADCK4	6.30064516129032	15.0350980392157	1.25476280772143
55205	ZNF532	31.7167741935484	75.5954901960784	1.25305412324182
54891	INO80D	23.0874193548387	54.998431372549	1.2522835498355	activated
8148	TAF15	15.3490322580645	36.5592156862745	1.25208742233325	activated
84132	USP42	21.9312903225806	52.2335294117647	1.25198549454183
3308	HSPA4	16.9735483870968	40.3972549019608	1.25096906395828
55183	RIF1	82.9745161290323	197.306078431373	1.24969518574417
5101	PCDH9	29.5767741935484	70.3107843137255	1.24928127504861
6574	SLC20A1	31.0761290322581	73.8376470588235	1.24854977316105
2047	EPHB1	8.46774193548387	20.1178431372549	1.2484264327556
9894	TELO2	11.5470967741935	27.4319607843137	1.24832757895838
80208	SPG11	8.29806451612903	19.7003921568627	1.24737756922789
64855	FAM129B	4.83612903225806	11.4719607843137	1.24618735485004
11179	ZNF277	11.618064516129	27.5566666666667	1.24603163966633
56674	TMEM9B	10.4545161290323	24.7870588235294	1.24546080405827
823	CAPN1	10.4370967741936	24.7445098039216	1.24538800055133
2823	GPM6A	394.471290322581	935.19862745098	1.24535250798613
57596	BEGAIN	7.07903225806452	16.778431372549	1.24498378880148
54813	KLHL28	19.3832258064516	45.9341176470588	1.24475742831542
1137	CHRNA4	3.39838709677419	8.05156862745098	1.24441968665108
5569	PKIA	47.4561290322581	112.432156862745	1.24438839092131
54858	PGPEP1	14.0448387096774	33.2694117647059	1.24415630149448
5454	POU3F2	43.2841935483871	102.530784313725	1.24414495095691
113189	CHST14	4.57677419354839	10.8411764705882	1.24411830471942
22911	WDR47	25.1067741935484	59.3419607843137	1.24097591931651
23200	ATP11B	5.77483870967742	13.6482352941176	1.24086186592951
63892	THADA	4.76612903225806	11.2623529411765	1.24061835318475
23339	VPS39	14.4670967741935	34.183137254902	1.24050937655846
57338	JPH3	8.68838709677419	20.5266666666667	1.24033908007384
23396	PIP5K1C	10.9348387096774	25.8298039215686	1.24010475115466
758	MPPED1	8.01387096774194	18.9249019607843	1.23971464037356
11252	PACSIN2	9.34	22.0560784313726	1.23968184764309
5802	PTPRS	104.227741935484	245.973529411765	1.23876374158041
1634	DCN	1.79193548387097	4.22823529411765	1.23853696637002	repressed
347	APOD	1.34129032258064	3.16450980392157	1.2383604946431
23608	MKRN1	36.7422580645161	86.6854901960784	1.23835023621689
4580	MTX1	11.8283870967742	27.8950980392157	1.2377582587439
79801	SHCBP1	12.708064516129	29.9374509803922	1.23620706914347
85352	KIAA1644	7.73322580645161	18.2098039215686	1.23557314306097
79707	NOL9	18.7338709677419	44.1119607843137	1.23552085636584
80209	PROSER1	11.1293548387097	26.201568627451	1.23528322213835
1400	CRMP1	210.310322580645	494.75862745098	1.23420520171781
57125	PLXDC1	2.39838709677419	5.6378431372549	1.23307881131946
200424	TET3	14.9122580645161	35.0247058823529	1.23187420384904	activated
23762	OSBP2	1.50258064516129	3.52490196078431	1.23014070788564
2063	NR2F6	6.62516129032258	15.5413725490196	1.23008643948195	repressed
79699	ZYG11B	33.8170967741936	79.2692156862745	1.22900789350358
7620	ZNF69	9.92129032258065	23.2366666666667	1.22780345793784
94081	SFXN1	30.8293548387097	72.2005882352941	1.22770589244056
9031	BAZ1B	75.3596774193548	176.428039215686	1.22721516805936
91752	ZNF804A	9.32258064516129	21.8227450980392	1.22703131344656
5229	PGGT1B	3.60516129032258	8.43470588235294	1.22627395745955
4193	MDM2	29.7851612903226	69.6676470588235	1.22589506734669
1107	CHD3	113.262580645161	264.818039215686	1.22533009427352
5521	PPP2R2B	71.6503225806452	167.466470588235	1.22482716948009
23039	XPO7	20.8332258064516	48.6882352941176	1.22468696818296
19	ABCA1	13.7532258064516	32.1178431372549	1.22360497129642	activated
57563	KLHL8	13.0770967741935	30.5121568627451	1.22234187975139
573	BAG1	24.1316129032258	56.2727450980392	1.22151199738935
4781	NFIB	659.438387096774	1537.42862745098	1.22120966086213
84671	ZNF347	7.17612903225806	16.726862745098	1.22088914556928
55715	DOK4	8.71935483870968	20.321568627451	1.22071847206078
10137	RBM12	24.8012903225806	57.7664705882353	1.21981717085391
64863	METTL4	13.5803225806452	31.6241176470588	1.21950747825495
55236	UBA6	25.2458064516129	58.7866666666667	1.21944521268149
3742	KCNA6	6.80322580645161	15.8335294117647	1.21869199917217
140461	ASB8	31.4451612903226	73.1556862745098	1.21813197153891
57030	SLC17A7	16.5803225806452	38.5694117647059	1.21798506744912	repressed
1185	CLCN6	19.0293548387097	44.2325490196078	1.21688173375109
54926	UBE2R2	66.5154838709677	154.601960784314	1.2167964928018
57541	ZNF398	10.551935483871	24.5213725490196	1.21653208522231
23043	TNIK	10.8987096774193	25.3252941176471	1.21642168277186	activated
23433	RHOQ	15.6348387096774	36.3274509803922	1.21629580210138
162989	DEDD2	8.64806451612903	20.0917647058824	1.21615509386649
84823	LMNB2	47.6093548387097	110.587647058824	1.21587325764067
10498	CARM1	19.058064516129	44.2674509803922	1.21584469159194
197322	ACSF3	3.90032258064516	9.05921568627451	1.21579270376882
51111	SUV420H1	31.7554838709677	73.7394117647059	1.21543015463249
144245	ALG10B	4.86064516129032	11.2847058823529	1.21514909460336
109	ADCY3	4.01387096774194	9.31470588235294	1.21451597616826
92369	SPSB4	10.0616129032258	23.3452941176471	1.21427017308707
7070	THY1	39.0138709677419	90.4723529411765	1.21348984245499
81928	CABLES2	5.69774193548387	13.208431372549	1.21299695782898
22883	CLSTN1	31.5364516129032	73.0188235294118	1.21124808289505
91304	TMEM259	18.9154838709677	43.7829411764706	1.21080119072324
4155	MBP	4.19483870967742	9.70019607843137	1.20939856950518
79823	CAMKMT	5.41451612903226	12.5188235294118	1.20919466820797
5878	RAB5C	14.2332258064516	32.9033333333333	1.20897107614093
8310	ACOX3	6.07806451612903	14.043137254902	1.20818137791186
158471	PRUNE2	2.17290322580645	5.01882352941176	1.20772529641071
11078	TRIOBP	22.6887096774194	52.4013725490196	1.20763003648483
11076	TPPP	3.45516129032258	7.97980392156863	1.20760023861059
222484	LNX2	1.83161290322581	4.22843137254902	1.20700793031285
90141	EFCAB11	3.4858064516129	8.0421568627451	1.20609000979895
124583	CANT1	10.2422580645161	23.6274509803922	1.20593017937485
80153	EDC3	13.9635483870968	32.2103921568627	1.20586062271096
55824	PAG1	29.2	67.1892156862745	1.20226132037964
79798	ARMC5	8.57516129032258	19.7280392156863	1.20201186034318
115209	OMA1	8.23870967741935	18.951568627451	1.20182695613151
3842	TNPO1	62.5093548387097	143.753921568627	1.20145729533062
90933	TRIM41	13.2006451612903	30.3535294117647	1.20125583740616
993	CDC25A	8.05032258064516	18.506862745098	1.20094185344664
8541	PPFIA3	12.3745161290323	28.4374509803922	1.20042003960117
10526	IPO8	11.5841935483871	26.6117647058824	1.19990657072058
321	APBA2	29.0638709677419	66.7501960784314	1.19954520884064
23241	PACS2	32.7958064516129	75.3192156862745	1.19950662548257
22838	RNF44	26.7154838709677	61.3470588235294	1.19931803058191
57683	ZDBF2	4.52064516129032	10.3525490196078	1.19538544808052	activated
9832	JAKMIP2	33.2241935483871	76.0739215686275	1.19516779574186
8780	RIOK3	23.1116129032258	52.9139215686275	1.19502939755635
9537	TP53I11	34.9396774193548	79.98	1.19477299251688
9875	URB1	3.94032258064516	9.01862745098039	1.19459414277835
5567	PRKACB	37.2748387096774	85.2650980392157	1.19375320737747
54662	TBC1D13	12.2932258064516	28.1035294117647	1.19288778814382
2885	GRB2	80.7309677419355	184.528235294118	1.19264749400549
64426	SUDS3	38.3370967741935	87.5898039215686	1.19202185215124
25917	THUMPD3	23.54	53.7472549019608	1.1910767517125
112885	PHF21B	39.4283870967742	90.0070588235294	1.19080345445733
23598	PATZ1	22.5590322580645	51.4778431372549	1.19024642751288
63827	BCAN	14.0167741935484	31.9150980392157	1.18708471243204
9923	ZBTB40	9.46483870967742	21.5441176470588	1.18664418688794
90850	ZNF598	11.4258064516129	25.9923529411765	1.18579124218003
339416	ANKRD45	2.27935483870968	5.18470588235294	1.18563661652332
64601	VPS16	14.0132258064516	31.8703921568627	1.18542767273885
4144	MAT2A	6.05774193548387	13.771568627451	1.18484087196918
1996	ELAVL4	199.591290322581	453.652941176471	1.18454024587521
10773	ZBTB6	11.4061290322581	25.8996078431373	1.18312099517063
10533	ATG7	7.40516129032258	16.8109803921569	1.18280079890551
9836	LCMT2	3.01	6.83098039215686	1.1823291640632	repressed
83607	AMMECR1L	6.12903225806452	13.9090196078431	1.18228953050067
58487	CREBZF	30.2861290322581	68.713137254902	1.18192875965903
23113	CUL9	8.44322580645161	19.1474509803922	1.18128614169624
9369	NRXN3	7.27645161290323	16.5001960784314	1.18117617695989	activated
5532	PPP3CB	34.1983870967742	77.5072549019608	1.18040307242083
79165	LENG1	13.4158064516129	30.3998039215686	1.18012823777039
8325	FZD8	59.5709677419355	134.970196078431	1.17995956738711
7030	TFE3	8.39774193548387	19.0213725490196	1.17954799268823
51265	CDKL3	4.50870967741935	10.2123529411765	1.17952878279834
151195	CCNYL1	4.47258064516129	10.1296078431373	1.17939892195688
56654	NPDC1	43.3358064516129	98.1	1.17869358393997
5494	PPM1A	29.5325806451613	66.7562745098039	1.17659601498776
51283	BFAR	38.6664516129032	87.3766666666667	1.17616569383547
8034	SLC25A16	5.61322580645161	12.6839215686275	1.17609885993801
10483	SEC23B	24.9551612903226	56.3833333333333	1.1759305429948
114823	LENG8	3.6441935483871	8.23098039215686	1.17546469550847	activated
6483	ST3GAL2	7.08258064516129	15.9807843137255	1.17399118645888
8566	PDXK	8.05741935483871	18.1682352941176	1.17302854659527
2874	GPS2	89.2974193548387	201.182745098039	1.1718161863962
10962	MLLT11	505.516451612903	1138.7631372549	1.17163774834931
5412	UBL3	14.5548387096774	32.7643137254902	1.17062646141667
55585	UBE2Q1	11.2135483870968	25.2307843137255	1.16994218084712
11338	U2AF2	16.01	36.0221568627451	1.16991125878775
404217	CTXN1	12.8548387096774	28.9190196078431	1.16970713517454
2675	GFRA2	4.72677419354839	10.6327450980392	1.16958625993281
4616	GADD45B	1.86161290322581	4.18725490196078	1.16945163027366
6000	RGS7	5.77	12.9782352941176	1.16945100330528
5947	RBP1	321.929032258065	724.019215686274	1.16928529932491
10409	BASP1	282.251290322581	634.499019607843	1.16863775854799
658	BMPR1B	2.31193548387097	5.1943137254902	1.16783201334088
55604	LRRC16A	6.34741935483871	14.2550980392157	1.16723589603377
9194	SLC16A7	5.03870967741936	11.3080392156863	1.16622255350068
53335	BCL11A	356.483225806452	799.269019607843	1.16484697739498
146923	RUNDC1	16.281935483871	36.4947058823529	1.16441498668993
7187	TRAF3	5.25	11.7598039215686	1.16347467754318
1763	DNA2	10.84	24.28	1.16340366490181
2891	GRIA2	128.847096774194	288.580784313725	1.16331520822723	activated
9371	KIF3B	28.2122580645161	63.1854901960784	1.16327115693088
57688	ZSWIM6	23.6354838709677	52.9094117647059	1.16256997808794
9057	SLC7A6	15.6825806451613	35.1017647058824	1.16238058089775
24141	LAMP5	1	2.23764705882353	1.1619824998355
55275	VPS53	19.521935483871	43.6609803921569	1.16124843127854
91368	CDKN2AIPNL	19.9241935483871	44.5449019607843	1.16073899791347
2778	GNAS	378.056129032258	845.202156862745	1.16069600526337
84299	MIEN1	70.4058064516129	157.34431372549	1.16015872226724
10771	ZMYND11	36.1951612903226	80.8878431372549	1.16012604710392
81790	RNF170	13.0935483870968	29.2572549019608	1.15993828864796
11128	POLR3A	21.0012903225806	46.8874509803922	1.15872387956273
56936	CCDC177	9.77032258064516	21.7945098039216	1.15748665470478
4675	NAP1L3	14.9406451612903	33.3270588235294	1.15745155509446
47	ACLY	116.873225806452	260.510980392157	1.15639971823456
3655	ITGA6	22.0832258064516	49.221568627451	1.15633970620733
10617	STAMBP	16.5093548387097	36.7872549019608	1.15592228217241
58490	RPRD1B	8.76451612903226	19.5127450980392	1.15467040383428
8509	NDST2	6.29096774193548	14	1.15407295756035
26049	FAM169A	10.0970967741936	22.4662745098039	1.15382037473204
158405	KIAA1958	14.3732258064516	31.9607843137255	1.15291892772979
3338	DNAJC4	28.8470967741935	64.1198039215686	1.15234388308844
11044	PAPD7	20.0758064516129	44.6035294117647	1.15169993057063
91851	CHRDL1	15.3296774193548	34.0452941176471	1.15112805785097
84548	TMEM185A	6.71645161290323	14.9125490196078	1.15075573508241	repressed
375287	RBM43	2.10935483870968	4.68176470588235	1.15025062213977
11135	CDC42EP1	2.5958064516129	5.76058823529412	1.15003332100354
3643	INSR	19.55	43.3790196078431	1.14982884006294
57724	EPG5	13.5677419354839	30.0917647058824	1.14918808020249
79571	GCC1	5.19096774193548	11.5033333333333	1.1479765454756
9578	CDC42BPB	11.0929032258065	24.5735294117647	1.14746808600688
5338	PLD2	6.19935483870968	13.728431372549	1.14697680234555
523	ATP6V1A	23.5964516129032	52.2298039215686	1.14630336131996
8861	LDB1	16.1806451612903	35.8013725490196	1.14574576579059
25822	DNAJB5	12.8587096774194	28.4372549019608	1.14503632482682
11094	CACFD1	19.7	43.5133333333333	1.14326190889914
83940	TATDN1	9.44612903225807	20.8623529411765	1.14310673239442
9063	PIAS2	8.30903225806452	18.3429411764706	1.14247262153287
5578	PRKCA	15.828064516129	34.9382352941176	1.14232188962948
8851	CDK5R1	79.8035483870968	176.044509803922	1.14141543440797
56953	NT5M	7.0841935483871	15.6133333333333	1.14010304127466
55327	LIN7C	28.7977419354839	63.4619607843137	1.13993640419294
58158	NEUROD4	7.6341935483871	16.8172549019608	1.13939456366885
79091	METTL22	11.4838709677419	25.2956862745098	1.13928235444537
79586	CHPF	3.99451612903226	8.79843137254902	1.1392255813491
66000	TMEM108	11.78	25.931568627451	1.1383699397801
80034	CSRNP3	28.8561290322581	63.4805882352941	1.13743771742917
58526	MID1IP1	9.85032258064516	21.6519607843137	1.1362548040147
4690	NCK1	3.46032258064516	7.60607843137255	1.13624627956943
51143	DYNC1LI1	37.3316129032258	82.0460784313725	1.13603653740249
26012	NSMF	57.7561290322581	126.826078431373	1.13480547072954
81706	PPP1R14C	1	2.19549019607843	1.13454309215035
9794	MAML1	19.2293548387097	42.2080392156863	1.13420745027934
284611	FAM102B	3.07451612903226	6.74705882352941	1.13389936460507
154796	AMOT	3.66161290322581	8.03352941176471	1.13355467264151	activated
6654	SOS1	30.5945161290323	67.0805882352941	1.13262225782187
5495	PPM1B	23.2464516129032	50.9066666666667	1.13084408498943
124995	MRPL10	16.0309677419355	35.1021568627451	1.13069816075231
57186	RALGAPA2	17.0877419354839	37.4149019607843	1.13065123052754
2194	FASN	52.0512903225806	113.941960784314	1.13029330564125
4249	MGAT5	12.4222580645161	27.1921568627451	1.13026314517549
55530	SVOP	13.6938709677419	29.9754901960784	1.13025302292849
10179	RBM7	16.1622580645161	35.3754901960784	1.13012136516383
3845	KRAS	38.7354838709677	84.7664705882353	1.12983795755416
51362	CDC40	28.5783870967742	62.5035294117647	1.12901316121242
388650	FAM69A	2.07838709677419	4.5443137254902	1.12859805826436
56925	LXN	5.57774193548387	12.1882352941176	1.12773616458497
51164	DCTN4	51.6306451612903	112.790588235294	1.12734715684336
147841	SPC24	3.60258064516129	7.86705882352941	1.12679364490779
84164	ASCC2	14.8622580645161	32.4533333333333	1.1267133421006
613	BCR	8.46709677419355	18.4721568627451	1.12541304595397
28969	BZW2	46.3203225806452	100.907450980392	1.12331550102321
10522	DEAF1	13.3054838709677	28.9727450980392	1.12267540620813
283248	RCOR2	28.3535483870968	61.728431372549	1.12240583369747
84206	MEX3B	24.138064516129	52.5498039215686	1.12237538125496
54953	C1orf27	25.8790322580645	56.2958823529412	1.12124573418178
57130	ATP13A1	13.1512903225806	28.6033333333333	1.12097892877972
129450	TYW5	8.34838709677419	18.153137254902	1.12064949685637
54434	SSH1	12.768064516129	27.7611764705882	1.12052886160184
26225	ARL5A	43.0964516129032	93.7003921568627	1.12048599735107
84239	ATP13A4	2.18032258064516	4.73176470588235	1.1178367364853
10927	SPIN1	73.9322580645161	160.439607843137	1.11775446252856
1534	CYB561	1.62677419354839	3.52980392156863	1.11757403510658
55435	AP1AR	24.9348387096774	54.0929411764706	1.11727747177448
5429	POLH	17.841935483871	38.6992156862745	1.11703220113349
1284	COL4A2	21.2393548387097	46.0421568627451	1.11621547479685
5728	PTEN	28.1348387096774	60.9849019607843	1.1160944259101
22836	RHOBTB3	60.0451612903226	130.136470588235	1.11590543539798
5863	RGL2	13.6129032258065	29.4982352941176	1.11565386566601
8454	CUL1	49.2841935483871	106.790588235294	1.11558757971207
63973	NEUROG2	76.501935483871	165.755882352941	1.11549191639974
25820	ARIH1	13.5225806451613	29.2935294117647	1.11521152448372
7840	ALMS1	24.3667741935484	52.7843137254902	1.11519398588628
7067	THRA	49.3641935483871	106.838039215686	1.11388854023104
64411	ARAP3	5.22677419354839	11.3049019607843	1.11295574207175
23070	CMTR1	3.79741935483871	8.21313725490196	1.11291408128257
10060	ABCC9	46.8493548387097	101.264117647059	1.11202196825051
127544	RNF19B	3.03290322580645	6.5543137254902	1.1117452648178
7270	TTF1	67.21	145.204705882353	1.1113404009224
8550	MAPKAPK5	5.77677419354839	12.4725490196078	1.11042033158244
8715	NOL4	21.3706451612903	46.1252941176471	1.10992764816778
7681	MKRN3	6.93838709677419	14.9727450980392	1.10966651206556
161742	SPRED1	19.468064516129	42.0060784313726	1.10948864543253
27148	STK36	4.48290322580645	9.67196078431373	1.10937503938428
55520	ELAC1	3.79161290322581	8.17960784313725	1.1092199945302
54756	IL17RD	17.0312903225806	36.7309803921569	1.10880966332892
29937	NENF	23.5106451612903	50.673137254902	1.10790702230383
23438	HARS2	10.1574193548387	21.8707843137255	1.10647104787502
5293	PIK3CD	1.29258064516129	2.78294117647059	1.10635612021741
55680	RUFY2	29.7474193548387	64.0129411764706	1.10559907973389	activated
10379	IRF9	2.44612903225806	5.2621568627451	1.10515374787665
253639	ZNF620	16.961935483871	36.4886274509804	1.10514608220766
83482	SCRT1	1.78645161290323	3.84176470588235	1.10467232367897
137886	UBXN2B	50.0712903225806	107.633725490196	1.1040746577663
80095	ZNF606	10.5945161290323	22.7682352941176	1.10370477763098
59345	GNB4	13.6212903225806	29.2713725490196	1.10362702204319
55084	SOBP	11.5674193548387	24.8496078431373	1.10315604366635
29799	YPEL1	27.2890322580645	58.6186274509804	1.10303795416813
54802	TRIT1	10.1051612903226	21.7019607843137	1.10273304784361
7596	ZNF45	5.25548387096774	11.281568627451	1.10207217492642
4357	MPST	50.5664516129032	108.518823529412	1.10169286307305
23504	RIMBP2	2.59096774193548	5.56	1.10159382915961	activated
54328	GPR173	3.16903225806452	6.79647058823529	1.10074340310648
1718	DHCR24	41.6951612903226	89.3909803921569	1.10024930078605
93973	ACTR8	10.2603225806452	21.9943137254902	1.10005449701714
2553	GABPB1	28.8764516129032	61.891568627451	1.09984941486448
[truncated: 7,170 more rows]

## Sheet: Supplemental Table S6C
Supplemental Table S6C. Spearman’s correlation between CHD8-activated/-repressed target genes and CHD8 during the transition from vRG cells to IPCs at GW10.
Gene ID	Symbol	Spearman’s correlation	CHD8 target at E14.5
55885	LMO3	0.633206682121585
53354	PANK1	0.55670562610431
120	ADD3	0.547582527146589
25920	NELFB	0.541185685583619
125058	TBC1D16	0.534314769008134
55114	ARHGAP17	0.534228213854771
163859	SDE2	0.533261246658703
63897	HEATR6	0.532476979548755
57452	GALNT16	0.530612832328576
80095	ZNF606	0.530219840253859
4800	NFYA	0.528739294287052
160	AP2A1	0.528652740350556
140467	ZNF358	0.527196481107692
55450	CAMK2N1	0.523766685073084
57459	GATAD2B	0.522939256375798
23271	CAMSAP2	0.521164389353727
2967	GTF2H3	0.519912599179797
57677	ZFP14	0.519241106642598
23400	ATP13A2	0.518963911126266
11094	CACFD1	0.517181078703649
1463	NCAN	0.515040079924843
57095	PITHD1	0.512485787057699
55327	LIN7C	0.512436773497346
79982	DNAJB14	0.511322970813124
400954	EML6	0.510975747980342	activated
56654	NPDC1	0.509426106857295
60509	AGBL5	0.504897049865271
9757	KMT2B	0.503733949295623
66000	TMEM108	0.503478177934297
862	RUNX1T1	0.502276133021317
126129	CPT1C	0.502254989175244
84440	RAB11FIP4	0.50152593605558
55756	INTS9	0.501123435691988
127703	C1orf216	0.500987472614275
9373	PLAA	0.499489090312514
9839	ZEB2	0.498947707452286
163882	CNST	0.498567874617602
80351	TNKS2	0.497431842637593
23169	SLC35D1	0.495682313763428
10802	SEC24A	0.494991384734595	activated
9820	CUL7	0.494350088719326
51077	FCF1	0.494174406274139
201595	STT3B	0.493273044285002
6908	TBP	0.49229932903305
54858	PGPEP1	0.491253751925148
3070	HELLS	0.489342552730175
5150	PDE7A	0.489046586633736
4808	NHLH2	0.488973263786556
128637	TBC1D20	0.488964746644583
56776	FMN2	0.488861151488241
2977	GUCY1A2	0.488034336338242	activated
6558	SLC12A2	0.487653160991785
324	APC	0.486811283521284	activated
9379	NRXN2	0.486427394051828
220164	DOK6	0.483064174825762
256987	SERINC5	0.482556235313214
1804	DPP6	0.482537211527309
1954	MEGF8	0.482140052131246
5599	MAPK8	0.480405313896652
116988	AGAP3	0.476568481977095
144348	ZNF664	0.476062225148225
3785	KCNQ2	0.475172063875108
79085	SLC25A23	0.474146141225555
56978	PRDM8	0.473741539844673
79811	SLTM	0.473509491054557
23395	LARS2	0.472349306903357	repressed
63939	FAM217B	0.470879016709474
79027	ZNF655	0.46912534100032
26090	ABHD12	0.467066670535325
27087	B3GAT1	0.466414222606313
10526	IPO8	0.464158842885675
57706	DENND1A	0.463423094787533
84950	PRPF38A	0.463232255278278
8451	CUL4A	0.463216723734463
5530	PPP3CA	0.463173416666785
203259	FAM219A	0.462871766477413
114793	FMNL2	0.46151168428991
57446	NDRG3	0.461393342660093
5872	RAB13	0.461274714257944
56252	YLPM1	0.461124665328773	activated
25970	SH2B1	0.461119331175854
8976	WASL	0.46109795416213
55090	MED9	0.460842671407917
83988	NCALD	0.459979071918738
27183	VPS4A	0.459781617071747
57532	NUFIP2	0.459743034785522
79794	C12orf49	0.459521589229397
23309	SIN3B	0.459333669721682
134829	CLVS2	0.458802685326255
2820	GPD2	0.458799288138194
6936	GCFC2	0.458540715213842
2835	GPR12	0.457778461542366
116113	FOXP4	0.457597211851007
23431	AP4E1	0.457353930053861
9261	MAPKAPK2	0.457181524055231	repressed
284252	KCTD1	0.456927008593448
28982	FLVCR1	0.456918220366205
115207	KCTD12	0.455880084406069
59283	CACNG8	0.455145243516304
54813	KLHL28	0.455002181464033
116225	ZMYND19	0.454837987134452
29761	USP25	0.454684809057471
23592	LEMD3	0.454399623653036
25927	CNRIP1	0.453740595917498
7073	TIAL1	0.453686635665913
11189	CELF3	0.453649368331323
79006	METRN	0.452737509217027	repressed
56850	GRIPAP1	0.452359642758871
55095	SAMD4B	0.452344479223432
5331	PLCB3	0.451860578256928
5578	PRKCA	0.451775111159792
55738	ARFGAP1	0.450492966038475
4978	OPCML	0.450194168790286
2230	FDX1	0.450160101424815
64780	MICAL1	0.450077565245277
283450	HECTD4	0.450049515995185	activated
53944	CSNK1G1	0.449474254311231
79364	ZXDC	0.44938464986712
10111	RAD50	0.449271748785608
55731	FAM222B	0.448787857503418
51088	KLHL5	0.448747059907136
29937	NENF	0.448669305421296
65986	ZBTB10	0.448625352128758	activated
65267	WNK3	0.448227671267591
158056	MAMDC4	0.447610867490872
51719	CAB39	0.447579579759387
7014	TERF2	0.447494386971853
10208	USPL1	0.447305742978004
4015	LOX	0.447289188835943	repressed
4093	SMAD9	0.446803432877527
64207	IRF2BPL	0.446670444743391
253980	KCTD13	0.446080375299111
11282	MGAT4B	0.445161207246695
29	ABR	0.444559863849745
80314	EPC1	0.444283156405504
10617	STAMBP	0.444053164619723
84530	SRRM4	0.444015276667839
55814	BDP1	0.443260267873238	activated
57634	EP400	0.443002323462687
57037	ANKMY2	0.442656294085069
148479	PHF13	0.442264427842022
23499	MACF1	0.44195494656264	activated
23028	KDM1A	0.441538265199926
10105	PPIF	0.441295970253998
64121	RRAGC	0.440658194273745
2044	EPHA5	0.440598545013004
1108	CHD4	0.440397772788912
1605	DAG1	0.440126036244694
8567	MADD	0.439802315123412
79947	DHDDS	0.439748802535178
7533	YWHAH	0.439640165921183
23196	FAM120A	0.439426934585136
22921	MSRB2	0.438744630314625
64083	GOLPH3	0.438458866744311
552889	ATXN7L3B	0.438259791452885
9663	LPIN2	0.43772310687108
55234	SMU1	0.437661820170927
84446	BRSK1	0.43748527669882
85865	GTPBP10	0.437268587823208
26173	INTS1	0.437255668751661
134553	C5orf24	0.43666096263522
5978	REST	0.436643863542037
254263	CNIH2	0.436572439033828	repressed
5709	PSMD3	0.436544014235343
54662	TBC1D13	0.436374187915456
9722	NOS1AP	0.436169817984295
25989	ULK3	0.435802359846309
4552	MTRR	0.435590939528085
7301	TYRO3	0.435474289462019
27242	TNFRSF21	0.434671855320444
5563	PRKAA2	0.434593255483056
5780	PTPN9	0.434474714249563
23057	NMNAT2	0.434288751792762
6328	SCN3A	0.433766589839282	activated
54790	TET2	0.433759435850673	activated
53353	LRP1B	0.43354898408178
23194	FBXL7	0.43318408412889
51309	ARMCX1	0.432738196618375
64766	S100PBP	0.432728032550969
9886	RHOBTB1	0.43253880162014
57609	DIP2B	0.432091296517573
11338	U2AF2	0.431968726947294
221981	THSD7A	0.431890513415163	activated
9545	RAB3D	0.431823478135285
51317	PHF21A	0.431645024519897
123096	SLC25A29	0.431613412474187
81037	CLPTM1L	0.431452959656614
55219	TMEM57	0.431348243865445
23215	PRRC2C	0.431103923268115	activated
107	ADCY1	0.430953925663824
253461	ZBTB38	0.430815564554031
726	CAPN5	0.430445549481613
10189	ALYREF	0.430338213023725
91526	ANKRD44	0.429966520904655
8031	NCOA4	0.429290014821872
89910	UBE3B	0.429217973770974
7280	TUBB2A	0.42910760443652
122830	NAA30	0.428995549663997
284439	SLC25A42	0.428947537496143
94030	LRRC4B	0.428588082978822
5986	RFNG	0.428081174142634
64221	ROBO3	0.427679881794106
9991	PTBP3	0.4276149029597
283638	CEP170B	0.427517417823649
1809	DPYSL3	0.427489739349678
25942	SIN3A	0.427042337696239
6433	SFSWAP	0.427041202660132
51430	SUCO	0.426894957078513
56996	SLC12A9	0.426619652945816
26472	PPP1R14B	0.426594940551662	repressed
84912	SLC35B4	0.426446754361934
80020	FOXRED2	0.426129867168465
4686	NCBP1	0.425834087271029
57534	MIB1	0.425676177491683
80228	ORAI2	0.425504546143542
148789	B3GALNT2	0.4253492708337
253943	YTHDF3	0.424588751650276
9859	CEP170	0.424543984027665
4298	MLLT1	0.424524865475492
79989	TTC26	0.424428812458526
23644	EDC4	0.424395838350965
2899	GRIK3	0.424378871598104
57595	PDZD4	0.424339599060327
23122	CLASP2	0.424320839613703
56929	FEM1C	0.424284607705707
9451	EIF2AK3	0.424217635289584
66036	MTMR9	0.424168349233128
1917	EEF1A2	0.424105380618386
23527	ACAP2	0.424035948033171
4131	MAP1B	0.423944746210545	activated
1889	ECE1	0.42371182247245
6855	SYP	0.423121147627073
199731	CADM4	0.423105669267731
503542	SPRN	0.423069255816816
6601	SMARCC2	0.423017734399662
8301	PICALM	0.422657372152063
118987	PDZD8	0.42239488285703
79805	VASH2	0.422385634767638
10000	AKT3	0.421821654938872
904	CCNT1	0.421381247631317
10186	LHFP	0.419463571429818
8780	RIOK3	0.419411236010391
8028	MLLT10	0.418684822890632
375704	ENHO	0.418461481165483
259282	BOD1L1	0.418228562303432	activated
9915	ARNT2	0.418149805617751
55379	LRRC59	0.418063841314928
166	AES	0.417526157763809
387119	CEP85L	0.417498998550186
22877	MLXIP	0.417468596906784
3661	IRF3	0.417468017816394
653121	ZBTB8A	0.417305763355305
79002	C19orf43	0.41717596160428
140609	NEK7	0.417060424040405
94005	PIGS	0.416536532471174
4130	MAP1A	0.416499010828776
3048	HBG2	0.416029880587805
10522	DEAF1	0.416007974459029
3742	KCNA6	0.416005844760619
5577	PRKAR2B	0.415910912123345
23598	PATZ1	0.415779165407489
84302	TMEM246	0.414829038994672
54904	WHSC1L1	0.414733839995546
57798	GATAD1	0.414690273449267	repressed
221477	C6orf89	0.41463724921404
4661	MYT1	0.414617960421561
60468	BACH2	0.414564386566931
90864	SPSB3	0.414491384709275
149986	LSM14B	0.414478853445266
221895	JAZF1	0.414293971088699
8831	SYNGAP1	0.413919090186036
9905	SGSM2	0.413896158632381
85369	STRIP1	0.413639212493681
25831	HECTD1	0.413573227744046
54454	ATAD2B	0.413465169838493
64773	PCED1A	0.412999181016781
2794	GNL1	0.412743672869139
205	AK4	0.412613375994744	repressed
7532	YWHAG	0.412569754464707
9960	USP3	0.412514990362691
10512	SEMA3C	0.412485474381952
23246	BOP1	0.412466038702725
10277	UBE4B	0.412255673801148
60559	SPCS3	0.41197901144708
57645	POGK	0.411706754337889
6482	ST3GAL1	0.411657450545303
9315	NREP	0.41159324458024
127829	ARL8A	0.411281198910383
8312	AXIN1	0.411099399742534
54764	ZRANB1	0.411011834477263
91445	RNF185	0.410593883936837
2273	FHL1	0.410008422367451
220382	FAM181B	0.409918450083447
3797	KIF3C	0.409915497156831
51567	TDP2	0.409729767729873
65055	REEP1	0.409586190763473
23373	CRTC1	0.409519008022955
83590	TMUB1	0.409211793602195
7922	SLC39A7	0.409206092843246
23240	KIAA0922	0.40916700922389
51117	COQ4	0.408976742468081
23394	ADNP	0.408811781816188
25902	MTHFD1L	0.408646401221394
5316	PKNOX1	0.408494314655312
2717	GLA	0.408358824299056
284339	TMEM145	0.408352167838663	activated
6609	SMPD1	0.407554244788294	repressed
23243	ANKRD28	0.407531731776611
10675	CSPG5	0.407346023910404
51412	ACTL6B	0.407285249428143
26046	LTN1	0.407225515932525
22883	CLSTN1	0.407206947977861
26122	EPC2	0.407188731469544
1740	DLG2	0.407033611761443
26012	NSMF	0.406370312267118
1632	ECI1	0.406302343029544
100507421	TMEM178B	0.40627154771335	activated
23259	DDHD2	0.406129543226829
26751	SH3YL1	0.405809925170663
83999	KREMEN1	0.405733985303424
219527	LRRC55	0.405561527621342
387763	C11orf96	0.405549720372532
53822	FXYD7	0.405520608795941
29952	DPP7	0.404990689165229
1760	DMPK	0.404855134727403	activated
64744	SMAP2	0.404791850678487
55869	HDAC8	0.404732511104341
204962	SLC44A5	0.404411852570718
476	ATP1A1	0.404292482952123
146059	CDAN1	0.404176435186365
9929	JOSD1	0.404141499306757	repressed
152789	JAKMIP1	0.403906690726992
81573	ANKRD13C	0.403768054270627
51621	KLF13	0.403651176292433
10085	EDIL3	0.40354133522999
1955	MEGF9	0.403474237952061
58509	CACTIN	0.403466908038569
4967	OGDH	0.403448224663589
51366	UBR5	0.40336715813982	activated
4528	MTIF2	0.403193172278026
3485	IGFBP2	0.403178928574541
23114	NFASC	0.403160862133719
51307	FAM53C	0.403144300177318
64282	PAPD5	0.403118430512224
27339	PRPF19	0.402839785111143
10391	CORO2B	0.402762625262305
63950	DMRTA2	0.402611427089066	repressed
50808	AK3	0.402533380600957
79018	GID4	0.402372217715471
2783	GNB2	0.402291692109065	repressed
10640	EXOC5	0.402231367025967
3800	KIF5C	0.402212009024676
1871	E2F3	0.402205276262001
4008	LMO7	0.402067043332815	activated
54331	GNG2	0.401891899402009
84231	TRAF7	0.401761536010325
25885	POLR1A	0.401544892904067
283989	TSEN54	0.401378140310905
93624	TADA2B	0.401062802941579
23197	FAF2	0.400945676980907
200424	TET3	0.40084895979544	activated
8490	RGS5	0.40073666545211
23275	POFUT2	0.400474912330762
10059	DNM1L	0.399911375726529
54487	DGCR8	0.399755507919389
896	CCND3	0.399614995968661	repressed
126731	CCSAP	0.399356224903351
9804	TOMM20	0.399307308979581
10081	PDCD7	0.39913820451923
327	APEH	0.39868383792369
79269	DCAF10	0.398637054540948
22893	BAHD1	0.398484261808693
55342	STRBP	0.398439770650791
8573	CASK	0.398331582467085
79968	WDR76	0.397855815573126
777	CACNA1E	0.397676792811501	activated
54878	DPP8	0.397519749284956
23387	SIK3	0.397270649299735
27032	ATP2C1	0.397002655421248
8153	RND2	0.396808296788872
2107	ETF1	0.396746222282225
9513	FXR2	0.396677895944742
153396	TMEM161B	0.396120846163441
22853	LMTK2	0.395971966923865
5585	PKN1	0.39575796450218
22911	WDR47	0.395723232905231
5868	RAB5A	0.395536584301746
636	BICD1	0.395434111202271
5058	PAK1	0.39534860332565
51768	TM7SF3	0.395266386312558
85021	REPS1	0.395130189027708
57707	TLDC1	0.395072724886851
91039	DPP9	0.394997580971023
3631	INPP4A	0.394952268596892
128866	CHMP4B	0.394845979421368
9761	MLEC	0.394753779050974
23013	SPEN	0.394678546193374	activated
1363	CPE	0.394602429994172
10527	IPO7	0.394514804591912
23141	ANKLE2	0.394510040506766
4916	NTRK3	0.394337637267998
3164	NR4A1	0.394317257576853
79699	ZYG11B	0.394202847202549
84532	ACSS1	0.393948181699641
84247	LDOC1L	0.393913703554995
54540	FAM193B	0.393540598641313
27147	DENND2A	0.393385953869143	repressed
5454	POU3F2	0.393282475773777
11276	SYNRG	0.393202144319947
1291	COL6A1	0.393100306570961
79158	GNPTAB	0.393033482507782
84249	PSD2	0.39260879289581
7398	USP1	0.392608046871677
65264	UBE2Z	0.392528442543257
37	ACADVL	0.392398091862435
79035	NABP2	0.392281463592168
7296	TXNRD1	0.391907778523903
57130	ATP13A1	0.391890393742559
7324	UBE2E1	0.391870012488977
8439	NSMAF	0.391815222195793
6249	CLIP1	0.391733279129082
55915	LANCL2	0.391635111828248
84631	SLITRK2	0.391625054146337
2235	FECH	0.391590472869306
10098	TSPAN5	0.391468007101531
23228	PLCL2	0.391425240031562
5863	RGL2	0.39137602284052
91252	SLC39A13	0.391168798139752
667	DST	0.391092376823496	activated
11152	WDR45	0.391037970398786
85378	TUBGCP6	0.390922683684878
55154	MSTO1	0.390810060998593
8425	LTBP4	0.390640204211141
51626	DYNC2LI1	0.390567401995888
7016	TESK1	0.390294437177258
8971	H1FX	0.390001440796775
10135	NAMPT	0.389905539245237
4644	MYO5A	0.389770965090728	activated
23091	ZC3H13	0.389758334696739	activated
29128	UHRF1	0.389731435121543
252995	FNDC5	0.389677077699841
7407	VARS	0.389671082458921
85456	TNKS1BP1	0.389463163944016
23201	FAM168A	0.389454103490993
153733	CCDC112	0.38941508919565	activated
112885	PHF21B	0.389048244423453
57125	PLXDC1	0.389011340029522
157	ADRBK2	0.388895925304113	activated
9054	NFS1	0.388838826193298
93643	TJAP1	0.388565765818806
9738	CCP110	0.388164106351943
4300	MLLT3	0.387872980435611
58487	CREBZF	0.387821221017975
2845	GPR22	0.387633954514298
10957	PNRC1	0.386918885267817
607	BCL9	0.386895362687709
23232	TBC1D12	0.386807733139004
9755	TBKBP1	0.386773534202194
9170	LPAR2	0.386691246275521
280	AMY2B	0.386487174039874
205251	LINC00116	0.386329047967621
8618	CADPS	0.386290237108925
84289	ING5	0.386113704312525
2670	GFAP	0.385842244392078
49855	SCAPER	0.385836175373364
5514	PPP1R10	0.385788700025646
11190	CEP250	0.385660769589487	activated
92737	DNER	0.385597051221718
9037	SEMA5A	0.385585450126958
26225	ARL5A	0.385369504981126
23545	ATP6V0A2	0.385362562216628
79720	VPS37B	0.385288434655343
4904	YBX1	0.385225405872139
26750	RPS6KC1	0.385182286202157
10155	TRIM28	0.385042494356258
84962	AJUBA	0.385028959425734
10128	LRPPRC	0.385002089532675
1718	DHCR24	0.384989990524958
321	APBA2	0.384936964987512
377	ARF3	0.3847868392666
64344	HIF3A	0.384716810110621
91851	CHRDL1	0.384692679390054
56478	EIF4ENIF1	0.384603234122919
7266	DNAJC7	0.384495214995906
53339	BTBD1	0.384320386019303
10943	MSL3	0.384296688598389
9454	HOMER3	0.384184024564361
8925	HERC1	0.383838105642078	activated
26574	AATF	0.383825668553669
9705	ST18	0.383803349175817
284207	METRNL	0.383694888129839
23229	ARHGEF9	0.383439065532557
80006	TRAPPC13	0.383369802695575
192111	PGAM5	0.383302907965424
5426	POLE	0.382870132487371
286144	TRIQK	0.382825537483978
124401	ANKS3	0.382784536777154
9832	JAKMIP2	0.382754270093853
57209	ZNF248	0.382679512107704
7709	ZBTB17	0.382664308900345
55658	RNF126	0.382610463879712
8325	FZD8	0.382576537597438
338707	B4GALNT4	0.382499429965666
146691	TOM1L2	0.382395808178869
26505	CNNM3	0.382349807341883
8527	DGKD	0.382259875204573
9117	SEC22C	0.382109829754567
266812	NAP1L5	0.38207679441357
55531	ELMOD1	0.382073150529653
782	CACNB1	0.381690223182569
4849	CNOT3	0.381576122012532
51479	ANKFY1	0.381520025611292
92822	ZNF276	0.381197664102032
26994	RNF11	0.381189333912026
8509	NDST2	0.381033468553274
25962	KIAA1429	0.380780173129185
8193	DPF1	0.380732771473407
1114	CHGB	0.380729151908129
25782	RAB3GAP2	0.380685640050375
997	CDC34	0.380470205511485
25862	USP49	0.380411028955179
2733	GLE1	0.380248227501554
221184	CPNE2	0.380190263338645
3911	LAMA5	0.380171177150912
83694	RPS6KL1	0.379970740632403
7547	ZIC3	0.379905410673815
221833	SP8	0.379857798824333
84552	PARD6G	0.379671291889413
9448	MAP4K4	0.379620848159521
1810	DR1	0.379610024938971
9275	BCL7B	0.379504936391977
90668	LRRC16B	0.379501433861936
9748	SLK	0.379458213197283	activated
57143	ADCK1	0.379434501055477
835	CASP2	0.379419469451254
57498	KIDINS220	0.379368704535449
5287	PIK3C2B	0.379357878955064
9639	ARHGEF10	0.379226783749867
80762	NDFIP1	0.379191994026147
81890	QTRT1	0.379187004405359
83636	C19orf12	0.379044204960278
81552	VOPP1	0.378968025907006
150726	FBXO41	0.378926238407325
27153	ZNF777	0.378873816818178
90231	KIAA2013	0.378849296476695
10079	ATP9A	0.378655899235718
9079	LDB2	0.378642843690262
51603	METTL13	0.378487946047924
55294	FBXW7	0.378056368536838
3845	KRAS	0.377722034485617
89853	MVB12B	0.377721482048654
256643	CXorf23	0.377557970356348
27324	TOX3	0.377302787883185
10381	TUBB3	0.377259079785972
144404	TMEM120B	0.377233123648844
51660	MPC1	0.377122586751024
23179	RGL1	0.376959001604779
153443	SRFBP1	0.37681902330045
56899	ANKS1B	0.376810675121729
51490	C9orf114	0.376751467760987
10801	SEPT9	0.376513514807302
1759	DNM1	0.376504930176075
23305	ACSL6	0.376260193979334
5906	RAP1A	0.375999305728382
387640	SKIDA1	0.375904943818206
9267	CYTH1	0.375857636462019
23774	BRD1	0.375838272467563
64848	YTHDC2	0.375821235031981
283871	PGP	0.375756538068802	repressed
10898	CPSF4	0.375689353640008
28232	SLCO3A1	0.375438892360587
81929	SEH1L	0.375333352288162
9194	SLC16A7	0.375212147148495
595	CCND1	0.375146150420505
29767	TMOD2	0.375023579040013
10752	CHL1	0.374903628266178	activated
84896	ATAD1	0.374772576103407
3267	AGFG1	0.374333315996082
57504	MTA3	0.374088439785815
23164	MPRIP	0.373981186006155
8427	ZNF282	0.373856697219566
57553	MICAL3	0.373565950307591
57599	WDR48	0.373420187434349
26207	PITPNC1	0.373256722853369
8499	PPFIA2	0.373253725345287
9470	EIF4E2	0.373240514865127
55102	ATG2B	0.373025620430261
95681	CEP41	0.372809393439903
3475	IFRD1	0.372767045839458
2926	GRSF1	0.372733634843044
4601	MXI1	0.372710270084088
23231	SEL1L3	0.37264849512934
9537	TP53I11	0.372553466745509
25938	HEATR5A	0.372508807126498
9400	RECQL5	0.372461152437702
10905	MAN1A2	0.371816853067897
222658	KCTD20	0.371814667555183
257397	TAB3	0.371731702716878
85440	DOCK7	0.37155521229284
6168	RPL37A	0.371552153540667	repressed
90525	SHF	0.371547294260797
55311	ZNF444	0.371508998982071
7423	VEGFB	0.371493788019581
4799	NFX1	0.371479416231361
823	CAPN1	0.371439985277889
4613	MYCN	0.371375803022847
171023	ASXL1	0.371237691777281
9113	LATS1	0.371177829847649
23469	PHF3	0.371170589812133
148156	ZNF558	0.370998525494796
152185	SPICE1	0.370992244148386
94241	TP53INP1	0.370850829385934
11168	PSIP1	0.370767804717664
11075	STMN2	0.370417713840789
57606	SLAIN2	0.370283246940754
11178	LZTS1	0.37001861019573
10810	WASF3	0.370004342327061
22983	MAST1	0.369904709917717
103	ADAR	0.36988571857741
8445	DYRK2	0.369834675432872
84461	NEURL4	0.369734995286586
9282	MED14	0.369696441288629
54549	SDK2	0.369689233885201
2802	GOLGA3	0.369682184648193
10585	POMT1	0.369637217485004
55276	PGM2	0.369447685661208
9543	IGDCC3	0.369407969669831
2487	FRZB	0.369360787480791
51280	GOLM1	0.369073869194803
8715	NOL4	0.369024371606035
23760	PITPNB	0.368925068781877
955	ENTPD6	0.368839295051258
23446	SLC44A1	0.368779812696755
51593	SRRT	0.368715698764438
55907	CMAS	0.368665041133708
4037	LRP3	0.368487095735222
60312	AFAP1	0.368395177340059
134266	GRPEL2	0.368093483292384
10014	HDAC5	0.368077893896873
3927	LASP1	0.367930913641524
142678	MIB2	0.367882632346391
129285	PPP1R21	0.367778629469235
5089	PBX2	0.367556796539827
54765	TRIM44	0.367543625919852
51727	CMPK1	0.367440167964445
7559	ZNF12	0.367197634561396
57215	THAP11	0.366975622375153
5911	RAP2A	0.36692472573614
84131	CEP78	0.366821816729994
8535	CBX4	0.366805022293416
23339	VPS39	0.366634925311068
51606	ATP6V1H	0.366605773110275
23637	RABGAP1	0.366576100671392
57488	ESYT2	0.366573184559268
60680	CELF5	0.36654557809103
7070	THY1	0.366544999437525
2531	KDSR	0.366525848147444
8559	PRPF18	0.366491610674005
1633	DCK	0.366409197487861
2957	GTF2A1	0.366350044926515
64781	CERK	0.366259529383542
83696	TRAPPC9	0.366180196037755
10153	CEBPZ	0.366117956908795
57482	KIAA1211	0.366097936867321
6426	SRSF1	0.365898870682906
51465	UBE2J1	0.365827926470106
114795	TMEM132B	0.365729580175055
5338	PLD2	0.365594823634785
25851	TECPR1	0.365543133117475
64326	RFWD2	0.365375259420581
83692	CD99L2	0.365339004765128
23523	CABIN1	0.365154042366807
114781	BTBD9	0.365090435316996
54442	KCTD5	0.365078888899412
8945	BTRC	0.36505789979648
9091	PIGQ	0.365036878396147
9931	HELZ	0.364979591999162
23236	PLCB1	0.364979413982518
9644	SH3PXD2A	0.364950507836485
55832	CAND1	0.364808545567457
84952	CGNL1	0.364723681797228
9378	NRXN1	0.364720182495002	activated
221302	ZUFSP	0.364579895652817
51274	KLF3	0.364564743198415
5261	PHKG2	0.364523757492195
30011	SH3KBP1	0.364441437413166
10252	SPRY1	0.364269741645046	repressed
83541	FAM110A	0.364245632416446
10116	FEM1B	0.364242876342903
643836	ZFP62	0.364088304694754
196403	DTX3	0.364058604926987
4646	MYO6	0.364009364619938
255967	PAN3	0.363969894485812
23636	NUP62	0.363713328919793	repressed
1995	ELAVL3	0.363615391581906
51343	FZR1	0.363515350590404
2332	FMR1	0.363425600644572
23099	ZBTB43	0.363200732098205
9679	FAM53B	0.363144829033869
253782	CERS6	0.363135637846681
81532	MOB2	0.363065526290155	repressed
11343	MGLL	0.36295111835327
8411	EEA1	0.362905734446553
57489	ODF2L	0.362887575251734
8128	ST8SIA2	0.362831041233179
1831	TSC22D3	0.36271025516229
79142	PHF23	0.362636471164841
26133	TRPC4AP	0.362617306780073
1213	CLTC	0.362573208143224
80816	ASXL3	0.362556529720484	activated
79685	SAP30L	0.362319156064548
7477	WNT7B	0.362226882811438	repressed
161424	NOP9	0.362191384010142
55109	AGGF1	0.362168700637748
57690	TNRC6C	0.362114122668711
91544	UBXN11	0.362081824095139
404217	CTXN1	0.362072352168874
253430	IPMK	0.361983046391613
122553	TRAPPC6B	0.361809212704329
284361	EMC10	0.361761742605569
49854	ZBTB21	0.361656273160837
4249	MGAT5	0.361589448203065
5045	FURIN	0.361448750101126
51386	EIF3L	0.361436770465346
64118	DUS1L	0.361427531899294
9118	INA	0.361099182686065
2786	GNG4	0.361070218956509
22941	SHANK2	0.360987386782383	activated
55740	ENAH	0.360964815237465
286148	DPY19L4	0.360897207514171
64426	SUDS3	0.36079935381168
112936	VPS26B	0.360737585810477
56257	MEPCE	0.360701050221002
84516	DCTN5	0.360633540289531
81603	TRIM8	0.360572509846322
115939	TSR3	0.360543943476825
5939	RBMS2	0.360541191467275
1387	CREBBP	0.360506511943574	activated
57213	SPRYD7	0.360501911684348
84524	ZC3H8	0.360490135112164
196441	ZFC3H1	0.360470950519651	activated
152137	CCDC50	0.360438847330669
6897	TARS	0.360425868688349
10382	TUBB4A	0.360417464529577
5878	RAB5C	0.360352480635056
6619	SNAPC3	0.359988827644559
55565	ZNF821	0.359807133076373
9811	CTIF	0.359684715444219
284996	RNF149	0.359562261753357
2891	GRIA2	0.359529881316638	activated
9867	PJA2	0.359452072620516
6047	RNF4	0.359292749571568
283554	GPR137C	0.359160647854188
81790	RNF170	0.35914315639967
80135	RPF1	0.359090671438398
9337	CNOT8	0.359047985547508
91782	CHMP7	0.359026518756508
55331	ACER3	0.359011196772793
4139	MARK1	0.358779304832689
2063	NR2F6	0.358771928108921	repressed
5928	RBBP4	0.358566593444742	repressed
55190	NUDT11	0.358534480129725
22905	EPN2	0.35852225203062
55288	RHOT1	0.358440362481002
221061	FAM171A1	0.358439773641826
285343	TCAIM	0.358416069418079
6774	STAT3	0.358396381164648
129450	TYW5	0.358098096288124
4193	MDM2	0.358026453702404
3725	JUN	0.357946926975505
5033	P4HA1	0.357927647787253
10629	TAF6L	0.3578900790446	repressed
55222	LRRC20	0.357784010376147
11188	NISCH	0.357746727542516
10658	CELF1	0.357650942505512
9892	SNAP91	0.35763034938406
2590	GALNT2	0.357616162231578
4135	MAP6	0.357560346810075
84918	LRP11	0.357448631838358
1384	CRAT	0.357424074847969
1503	CTPS1	0.357422889557985
10938	EHD1	0.357317693084877	repressed
55205	ZNF532	0.357310225796105
64130	LIN7B	0.357286074207231
5891	MOK	0.357118017408116
5094	PCBP2	0.35709797538592
4925	NUCB2	0.356806465984438
3093	UBE2K	0.356797647464319
56944	OLFML3	0.35672642249498
2054	STX2	0.356628994610674
23062	GGA2	0.356596980850308
57140	RNPEPL1	0.356474654247322
79188	TMEM43	0.356426559109563
51605	TRMT6	0.356336795112458
26010	SPATS2L	0.356295028616418
7528	YY1	0.35613962537611
221687	RNF182	0.356065372794169
3897	L1CAM	0.355965466711099
7764	ZNF217	0.355896469818541
2263	FGFR2	0.355801687997188
91404	SESTD1	0.355444996794114
23300	ATMIN	0.355366080148122
50512	PODXL2	0.35507040265148
64641	EBF2	0.354902776695958
219771	CCNY	0.35487536765175
653319	KIAA0895L	0.354866814467039
9108	MTMR7	0.354831943676371
192683	SCAMP5	0.354634218669628
8027	STAM	0.354616860154094
2619	GAS1	0.354537710478277	repressed
5297	PI4KA	0.354477247374108
79047	KCTD15	0.354473548636657
51246	SHISA5	0.354397913179106
3295	HSD17B4	0.354050605103862
10137	RBM12	0.353676412175138
23317	DNAJC13	0.353645380528975
375449	MAST4	0.353577443930623	activated
23230	VPS13A	0.353467675778038
3786	KCNQ3	0.353399794172778
22979	EFR3B	0.353367129649148
3727	JUND	0.353336084702186
384	ARG2	0.353216809238263
54822	TRPM7	0.353105658514266
8816	DCAF5	0.353100116266062
129303	TMEM150A	0.353058007986759
55521	TRIM36	0.353033586376754
7473	WNT3	0.352986841397778
22800	RRAS2	0.352814192761125
197407	ZNF48	0.352755628749515
4692	NDN	0.352686574362472
9794	MAML1	0.352598101126744
10983	CCNI	0.352532169627345
5606	MAP2K3	0.352513252072571
4741	NEFM	0.352451952081358	activated
8609	KLF7	0.352432445458704
57162	PELI1	0.352413684344894
1952	CELSR2	0.352347180113258	activated
6938	TCF12	0.352333446724023
4149	MAX	0.352278203149928
54328	GPR173	0.352268874031346
127428	TCEANC2	0.352200071669959
421	ARVCF	0.352187738493016
55585	UBE2Q1	0.35196195025677
55573	CDV3	0.351907015270112
109	ADCY3	0.351836254381169
414918	DENND6B	0.351766894511509
3092	HIP1	0.351569185789123
6620	SNCB	0.351533386449892
488	ATP2A2	0.35128789360907
127687	C1orf122	0.351232799025909	repressed
57542	KLHL42	0.351146870883146
10656	KHDRBS3	0.351132680871758
1268	CNR1	0.35111209609077
2909	ARHGAP35	0.351021613789925
23097	CDK19	0.35093744975108
57118	CAMK1D	0.350814597993854
57142	RTN4	0.350794865892493
6670	SP3	0.350758966600466
6253	RTN2	0.350754360701488
55246	CCDC25	0.350744570466304
7328	UBE2H	0.350728259932776
84687	PPP1R9B	0.350651113418821
2534	FYN	0.350517499787856
145482	PTGR2	0.350513250979298
131566	DCBLD2	0.350511577925811
894	CCND2	0.350433803091061
376940	ZC3H6	0.350422449748376
65125	WNK1	0.350267504747537	activated
29965	CDIP1	0.350233290522983
55035	NOL8	0.350110302810567
9894	TELO2	0.349987675233171
6161	RPL32	0.349951495581765
8417	STX7	0.349898513073183
5589	PRKCSH	0.349893629247384
58490	RPRD1B	0.34981403348012
23126	POGZ	0.34979653930242
26270	FBXO6	0.349776276419876
23030	KDM4B	0.349722622821726
118813	ZFYVE27	0.349473742414137
2317	FLNB	0.349338833024153
6789	STK4	0.349201349074476
10371	SEMA3A	0.349150780881834
6881	TAF10	0.349091380512788	repressed
6455	SH3GL1	0.349087716545615
54928	IMPAD1	0.349043955244971
87178	PNPT1	0.349027922303887
196500	PIANP	0.34867743636062
55204	GOLPH3L	0.348645426746055
51696	HECA	0.348507506076331
23287	AGTPBP1	0.348446148485516
65095	KRI1	0.348402873257891
83548	COG3	0.3483820290108
9217	VAPB	0.348343575690134
1827	RCAN1	0.34819787919587
64785	GINS3	0.348084542606183
55526	DHTKD1	0.347947264950517
56907	SPIRE1	0.347906534686775
57216	VANGL2	0.347905041439583
901	CCNG2	0.347903046392334
9896	FIG4	0.347873272618204
9397	NMT2	0.347846667566845
54958	TMEM160	0.347752764686251
131965	METTL6	0.347742294496329
23518	R3HDM1	0.347640930198307
463	ZFHX3	0.347606220325384	activated
202052	DNAJC18	0.347503503817022
5064	PALM	0.347481170713733
5138	PDE2A	0.347467170391275
9715	FAM131B	0.347455309160021
170954	PPP1R18	0.347366620888284
4761	NEUROD2	0.347322414104733
387104	SOGA3	0.34720829897048
2823	GPM6A	0.347208003654509
5662	PSD	0.347188720942364
4152	MBD1	0.347116761861753
29888	STRN4	0.347096194333978
2878	GPX3	0.347007930832488	repressed
2764	GMFB	0.346969109389395
2026	ENO2	0.346919212094952
10845	CLPX	0.346860077111799
84894	LINGO1	0.346827168810523
5291	PIK3CB	0.346798754829316
5802	PTPRS	0.346659905729426
9659	PDE4DIP	0.34657444484187
53615	MBD3	0.346504400194619
2140	EYA3	0.346325443478403
8812	CCNK	0.34624891532977
10439	OLFM1	0.346137068492524
7795	MEMO1	0.346011050890086
51072	MEMO1	0.346011050890086
54838	WBP1L	0.345980868488577
1203	CLN5	0.345768353769901
1741	DLG3	0.345717490225118
347731	LRRTM3	0.345709248456618
64919	BCL11B	0.345569988256216
10472	ZBTB18	0.345469172336114
19	ABCA1	0.345015472166834	activated
5257	PHKB	0.344994602525664
54915	YTHDF1	0.344951395637777
7265	TTC1	0.344941706470864
29997	GLTSCR2	0.344911396283498
50855	PARD6A	0.344733157095814
6877	TAF5	0.344593406618404
4885	NPTX2	0.34452271791129
26262	TSPAN17	0.344322996976046
79038	ZFYVE21	0.344255316405212	repressed
131870	NUDT16	0.344236827817939
55615	PRR5	0.344201989373496
23544	SEZ6L	0.344003979016026
2051	EPHB6	0.343854633514066
392	ARHGAP1	0.343732381877233
23046	KIF21B	0.343722411223657
9208	LRRFIP1	0.343700190911295
22854	NTNG1	0.343601110022386
51684	SUFU	0.343586830402339
9779	TBC1D5	0.343570479273178
9962	SLC23A2	0.343529089307312
2551	GABPA	0.34345663854465
65220	NADK	0.343373125461151
285590	SH3PXD2B	0.343350090156479
1949	EFNB3	0.343286960388374
53938	PPIL3	0.343276305614488
51678	MPP6	0.343255297147989
10534	SSSCA1	0.343201679385399
6326	SCN2A	0.343139361010632	activated
55957	LIN37	0.343122289826501
55958	KLHL9	0.343045908915153
55269	PSPC1	0.343006714207418
5195	PEX14	0.342981873554396
388228	SBK1	0.342975289486237
3843	IPO5	0.342919227300849
8622	PDE8B	0.342820112394265
80184	CEP290	0.342813325162632
28981	IFT81	0.342790114948166
9026	HIP1R	0.342680531336873
112	ADCY6	0.342547884501643
6505	SLC1A1	0.342447719107712
55884	WSB2	0.342395819036036
25909	AHCTF1	0.342224528511564
4884	NPTX1	0.342144562123866
284273	ZADH2	0.342012649103829
8667	EIF3H	0.342003702323881
57685	CACHD1	0.341951847345072
4796	TONSL	0.341921197748075
81576	CCDC130	0.341914596341404
11267	SNF8	0.341900924465783
472	ATM	0.341880404474813	activated
57189	KIAA1147	0.341875212693545
4137	MAPT	0.341844804879013
135293	PM20D2	0.341759146501789
10397	NDRG1	0.341736332317324
56963	RGMA	0.341678080656441
9969	MED13	0.341380351903955
80709	AKNA	0.341372699872306
57699	CPNE5	0.341347672106153
6602	SMARCD1	0.341267326978337
8310	ACOX3	0.340970625911056
153222	CREBRF	0.340967202524155
51729	WBP11	0.340822536496003
6002	RGS12	0.340811035365122
9792	SERTAD2	0.340762919054642
191	AHCY	0.340719562703833
79718	TBL1XR1	0.340492638064451
79786	KLHL36	0.340335351569009
54437	SEMA5B	0.340276119063704
6461	SHB	0.340260612957955
6722	SRF	0.340215268545067
9784	SNX17	0.340032648013258
116228	COX20	0.340005893028764
28971	AAMDC	0.339885486487559
8558	CDK10	0.33984855949387
8453	CUL2	0.339826950736523
7515	XRCC1	0.339777597089042
2596	GAP43	0.339702062841667
53616	ADAM22	0.339675877948406	activated
23165	NUP205	0.339626041538452
402665	IGLON5	0.339448925602141
27253	PCDH17	0.339427327535187
57337	SENP7	0.339357638498541
317762	CCDC85C	0.339252928588221
63901	FAM111A	0.33924397553189
219402	MTIF3	0.339220338387553
9066	SYT7	0.339119951615137
5917	RARS	0.33902562145258
54434	SSH1	0.338978363228537
96764	TGS1	0.338945592888539
8859	STK19	0.338881720791936
22846	VASH1	0.338878338837026
11247	NXPH4	0.338864144394242
84668	FAM126A	0.338772582496773
5451	POU2F1	0.338769834900679	activated
29915	HCFC2	0.338703747256569
154810	AMOTL1	0.338677482931949
23042	PDXDC1	0.338627550052885
26040	SETBP1	0.338588755669116
6622	SNCA	0.33858721620826
1272	CNTN1	0.338553958099898
156	ADRBK1	0.338462859312089
285382	C3orf70	0.338446300007948
5310	PKD1	0.338377008519509
3977	LIFR	0.338354940911078
9829	DNAJC6	0.33832616200163
51201	ZDHHC2	0.338289823087451
10982	MAPRE2	0.338211321917246
9295	SRSF11	0.33818641804951
85444	LRRCC1	0.338186392331037	activated
50804	MYEF2	0.338117318184319
2673	GFPT1	0.337989774598138
9486	CHST10	0.337780145290022
57447	NDRG2	0.337752444396959
11060	WWP2	0.337704011468849
8729	GBF1	0.337600300877333
23053	ZSWIM8	0.33759046299571
57555	NLGN2	0.337510000543962
8522	GAS7	0.337507654888503
25875	LETMD1	0.337458233198242
4045	LSAMP	0.337371722662619
8720	MBTPS1	0.337322519625673
55228	PNMAL1	0.337310836946839
112574	SNX18	0.337301988482362
3005	H1F0	0.337247022806633
11284	PNKP	0.337232358973172
593	BCKDHA	0.337229187769235	repressed
57192	MCOLN1	0.337066711905329
55278	QRSL1	0.337039757822112
641	BLM	0.337034502345077
143282	FGFBP3	0.337023201601468
23456	ABCB10	0.336948099857775
84083	ZRANB3	0.336866414547703
5900	RALGDS	0.336823190593501
79641	ROGDI	0.336822476657761
85416	ZIC5	0.336697201527459
9847	C2CD5	0.336561467142227
23039	XPO7	0.336427468503534
22850	ADNP2	0.336348939058838
23060	ZNF609	0.336203779468355
83860	TAF3	0.336005584790115
5596	MAPK4	0.335921235357153
7469	NELFA	0.335809616952445
4329	ALDH6A1	0.335427458266512
6198	RPS6KB1	0.335218393531223
3628	INPP1	0.33519996369254
2562	GABRB3	0.335186412909558
81926	ABHD17A	0.335074470769479	repressed
83452	RAB33B	0.33502425485263
83891	SNX25	0.335005455873009
161742	SPRED1	0.334921602311183
56853	CELF4	0.334817319837369
100506658	OCLN	0.334761143701581
6456	SH3GL2	0.334718451628778
1938	EEF2	0.334648983369787
79707	NOL9	0.334633033324988
124402	UBALD1	0.334630798391922
1400	CRMP1	0.334602677188572
1641	DCX	0.334592752410036
7791	ZYX	0.334384527930221
2058	EPRS	0.334319296687125
55352	COPRS	0.334294082164504
10613	ERLIN1	0.334224823101131
206358	SLC36A1	0.334135360489647
22866	CNKSR2	0.334113268556358
26190	FBXW2	0.333995806860381
55717	WDR11	0.333839613649833
6015	RING1	0.333822213519084
3842	TNPO1	0.333621329688511
23048	FNBP1	0.333343241882732
79587	CARS2	0.33328373961573
166614	DCLK2	0.333237310872894
63941	NECAB3	0.333160266184639
27044	SND1	0.333104606076773
4610	MYCL	0.333097559947585
114787	GPRIN1	0.333062800643065
57687	VAT1L	0.332990856794802
11079	RER1	0.332860885748887
1455	CSNK1G2	0.332660368441337
339745	SPOPL	0.332618693834444
23303	KIF13B	0.332524522573929
7108	TM7SF2	0.332510053066159
64978	MRPL38	0.33248652280823
7046	TGFBR1	0.33248216531272
7267	TTC3	0.332246850219248
30815	ST6GALNAC6	0.332159017540794
57631	LRCH2	0.332153005821093
57563	KLHL8	0.332115214673599
123879	DCUN1D3	0.331915325429315
9196	KCNAB3	0.33190183142708
51114	ZDHHC9	0.331601814745032
9585	KIF20B	0.331178878838992
64793	CEP85	0.331167233150514
1855	DVL1	0.331151933001234
148014	TTC9B	0.331007655540306
23466	CBX6	0.330960169123081
26049	FAM169A	0.330935926782978
6900	CNTN2	0.33091012996538
9943	OXSR1	0.330884974567659
23181	DIP2A	0.330877754440433
8440	NCK2	0.330845418762006
26057	ANKRD17	0.330819042777754
401207	C5orf63	0.330816508881147
116150	NUS1	0.330785187170348
9737	GPRASP1	0.330622596071009
9522	SCAMP1	0.330602517480301
84187	TMEM164	0.330590190318742
8625	RFXANK	0.330556459355727
27250	PDCD4	0.330549548050127
5531	PPP4C	0.33053319428605
10999	SLC27A4	0.33048503648109
10297	APC2	0.330398916339754
51633	OTUD6B	0.330364228701806
90987	ZNF251	0.33034757066749
490	ATP2B1	0.330312105519472
54849	DEF8	0.330151502988112
9343	EFTUD2	0.330141824294774
5523	PPP2R3A	0.330140171173848
80128	TRIM46	0.330005358508373
23239	PHLPP1	0.329983795080907
8867	SYNJ1	0.329982096751326
51592	TRIM33	0.329980177225763
55512	SMPD3	0.329973424700043
59274	MESDC1	0.329932836536482
54926	UBE2R2	0.329818481876533
160518	DENND5B	0.329777590757545
27352	SGSM3	0.329688878007897
78999	LRFN4	0.329647639903033
9732	DOCK4	0.329589838193209	activated
6259	RYK	0.329583859765681
7084	TK2	0.32956532124842
23524	SRRM2	0.32941412563966	activated
84256	FLYWCH1	0.329375534689246
10908	PNPLA6	0.329331583501423
1912	PHC2	0.329289079850522
150275	CCDC117	0.329247821877811
5048	PAFAH1B1	0.329200634815505
3704	ITPA	0.329179720283553
4664	NAB1	0.329050766031329
54832	VPS13C	0.329002189604853	activated
57186	RALGAPA2	0.32897543761582
65982	ZSCAN18	0.328831976412596
9231	DLG5	0.328662538854753
283237	TTC9C	0.328477588589359
57648	KIAA1522	0.328439364953374
151613	TTC14	0.328398327265984	activated
50484	RRM2B	0.32830911183246
29068	ZBTB44	0.327698189928674
11102	RPP14	0.327627145550211
56172	ANKH	0.32756969958721
27347	STK39	0.327532490463489
6051	RNPEP	0.327494698216555
92369	SPSB4	0.327320169362265
5283	PIGH	0.327275325713961
54769	DIRAS2	0.327143481055771
27043	PELP1	0.327067488239865
4204	MECP2	0.326969064090025
5641	LGMN	0.326926833360047
320	APBA1	0.326845225932374
59339	PLEKHA2	0.326806139926015
56970	ATXN7L3	0.326716505359343
9649	RALGPS1	0.326713615070486
55183	RIF1	0.326687997821622
63827	BCAN	0.326685096909476
343450	KCNT2	0.326658485760917
79143	MBOAT7	0.326656338403047
84162	KIAA1109	0.326640611279598	activated
5865	RAB3B	0.326627984362433
284004	HEXDC	0.326593531710477
79751	SLC25A22	0.326473907209445
644150	WIPF3	0.326463712220951
56061	UBFD1	0.326323900059379
83941	TM2D1	0.326290880457345	repressed
128869	PIGU	0.326269448615023
4784	NFIX	0.326068498972816
197322	ACSF3	0.326034001311666
80856	KIAA1715	0.325943098464829
80206	FHOD3	0.325850922691122
9807	IP6K1	0.325820831661922
9318	COPS2	0.325779821602938
92211	CDHR1	0.325723713990833
10919	EHMT2	0.325701040442767
56913	C1GALT1	0.3256601109559
84930	MASTL	0.325578467139985
57597	BAHCC1	0.325487431531728	activated
950	SCARB2	0.325461622009486
114876	OSBPL1A	0.32543515588692
5529	PPP2R5E	0.325384917213963
6860	SYT4	0.325370271759381
83660	TLN2	0.325271954813767
1281	COL3A1	0.325245644132183
114785	MBD6	0.325204119356546	activated
4520	MTF1	0.325133609361078
10370	CITED2	0.325079868794909
5521	PPP2R2B	0.324947797328945
2217	FCGRT	0.324916553500907
64778	FNDC3B	0.324867983719309
8085	KMT2D	0.324831553570704	activated
79042	TSEN34	0.324828852878357	repressed
51108	METTL9	0.324777391546874
9331	B4GALT6	0.324733853909199
84886	C1orf198	0.324634929257007
55700	MAP7D1	0.324576327330451
23299	BICD2	0.324412280357663
6092	ROBO2	0.324277877728387
9973	CCS	0.324226012699901
8692	HYAL2	0.324210933187937	repressed
9683	N4BP1	0.32416392964333
53834	FGFRL1	0.324135588803803
3421	IDH3G	0.324114025740988
729993	SHISA9	0.324091448304537
79012	CAMKV	0.323897822478046
22982	DIP2C	0.32387547653161
57666	FBRSL1	0.323853618518408
4883	NPR3	0.323747911397561
10849	CD3EAP	0.323738519320889
221908	PPP1R35	0.323716819275339	repressed
55066	PDPR	0.323639069108974
64921	CASD1	0.323618821094507
8722	CTSF	0.323610682945236
79760	GEMIN7	0.323499727365612
10390	CEPT1	0.323443596138716
22920	KIFAP3	0.323395875643308
53346	TM6SF1	0.323351249628218
29928	TIMM22	0.323271406756992	repressed
267	AMFR	0.323228484729171
360023	ZBTB41	0.323203938710279
580	BARD1	0.323091418572668
11261	CHP1	0.322996501277302
55033	FKBP14	0.322976938364919
83856	FSD1L	0.322963255510428
23433	RHOQ	0.322874701767748
104	ADARB1	0.322836928992446
9989	PPP4R1	0.322771342790369
151011	SEPT10	0.3227371152015
114823	LENG8	0.322528798137222	activated
81566	CSRNP2	0.322510663253757
221078	NSUN6	0.322484720346799
11154	AP4S1	0.322445395724474
9024	BRSK2	0.322425132513491
8454	CUL1	0.322378771675607
55181	SMG8	0.322377572681339
253714	MMS22L	0.322352245255336
9750	FAM65B	0.322232890896529
9690	UBE3C	0.322187674943604
54453	RIN2	0.322116712236996
27344	PCSK1N	0.322017671704539
3636	INPPL1	0.32191926699186
27005	USP21	0.321869704042081
64411	ARAP3	0.321780587119815
56998	CTNNBIP1	0.321714533981025
256714	MAP7D2	0.321462672645256
137886	UBXN2B	0.321393154727037
55605	KIF21A	0.321316315439245
51362	CDC40	0.321265436278795
6714	SRC	0.321252812016521
9765	ZFYVE16	0.321208446754176
6654	SOS1	0.321194085937839
4125	MAN2B1	0.321167587766085
57862	ZNF410	0.321155166875873
55333	SYNJ2BP	0.321097525979238
113201	CASC4	0.321082826042712
22847	ZNF507	0.321077042821245
22835	ZFP30	0.321071459052323
56475	RPRM	0.321071459052323
10180	RBM6	0.320942729200507
9887	SMG7	0.320727254085458
388135	C15orf59	0.320582377619421
1445	CSK	0.320565348344129
50485	SMARCAL1	0.320553648777852
4296	MAP3K11	0.320496672674702
23041	MON2	0.320468735045711
7812	CSDE1	0.320422281509121
79697	C14orf169	0.320332878884267
55964	SEPT3	0.320183107648859
83475	DOHH	0.320157545314884
8985	PLOD3	0.320076439603978
23035	PHLPP2	0.320024914523023
8034	SLC25A16	0.32001431938387
23677	SH3BP4	0.319940024248244
6732	SRPK1	0.319925061122221
121260	SLC15A4	0.319845638283106
171568	POLR3H	0.319631601360906
25789	TMEM59L	0.319606113015047
79774	GRTP1	0.319594601138408	repressed
1265	CNN2	0.319590152862593
23410	SIRT3	0.319582618047935
3643	INSR	0.319400160740712
29102	DROSHA	0.319328248416243
145853	C15orf61	0.319317442241107
10133	OPTN	0.319269280024866
161253	REM2	0.319251029966309
25907	TMEM158	0.31914972330537
246175	CNOT6L	0.319118472227587
123283	TARSL2	0.318980165338242
54826	GIN1	0.318823250737478
84447	SYVN1	0.318805043710425
84679	SLC9A7	0.318784277816935
51373	MRPS17	0.318749720730806
157922	CAMSAP1	0.318744965840015
382	ARF6	0.318714936920805
92521	SPECC1	0.318712735083839
54491	FAM105A	0.318701081710782
1025	CDK9	0.318598118188778
23108	RAP1GAP2	0.318589339834472
22937	SCAP	0.318476243081623
8745	ADAM23	0.31840924471083
3995	FADS3	0.31839227819715
25822	DNAJB5	0.318325389528248
84942	WDR73	0.318275926623259
79772	MCTP1	0.318255963900348
478	ATP1A3	0.318223608245742
747	DAGLA	0.318158127121633
23022	PALLD	0.318128140907933
26003	GORASP2	0.318122513475325
10745	PHTF1	0.3180489332597
9253	NUMBL	0.318011554723985
51566	ARMCX3	0.317988237075938
7837	PXDN	0.317984561282202
23274	CLEC16A	0.317966692206147
55196	KIAA1551	0.317925013702927
154007	SNRNP48	0.317889151200307
4774	NFIA	0.317886210187253
84219	WDR24	0.317806960679338
23443	SLC35A3	0.317801914187452
81855	SFXN3	0.317703574411356
10142	AKAP9	0.317622713992927	activated
9873	FCHSD2	0.317584027117699
84079	ANKRD27	0.317568492716194
5524	PPP2R4	0.317542169833652
471	ATIC	0.317504093768853
4926	NUMA1	0.317490174072939
6599	SMARCC1	0.317423598663089
148281	SYT6	0.317204660120836
51747	LUC7L3	0.317191655268961	activated
672	BRCA1	0.317178623050746
27245	AHDC1	0.317158970073583
92689	FAM114A1	0.317083482927126
88455	ANKRD13A	0.316937868049485
54902	TTC19	0.316903883714886
57619	SHROOM3	0.316876165873692
9094	UNC119	0.316808698254105	repressed
1119	CHKA	0.316799163918478
84273	NOA1	0.316789023726142
80218	NAA50	0.316754649630273
64223	MLST8	0.316741988851338
157638	FAM84B	0.316700893018812
28966	SNX24	0.316546168544899
57604	KIAA1456	0.316493313934442
581	BAX	0.316456309952541
1389	CREBL2	0.316384391428164
7264	TSTA3	0.316371893115647
57633	LRRN1	0.316370278692682
92181	UBTD2	0.316365472284639
2947	GSTM3	0.316209919431768
2039	DMTN	0.316188342792554
55160	ARHGEF10L	0.316112475247204
79828	METTL8	0.316038437006837
8943	AP3D1	0.316006651706668
10139	ARFRP1	0.315856944915378
57540	PTCHD2	0.315623591394443
26523	AGO1	0.315590658491163
23140	ZZEF1	0.31557176611736
23762	OSBP2	0.315262075706042
1763	DNA2	0.315208765229041
26175	TMEM251	0.315171546028413
30819	KCNIP2	0.315109361264345
128434	VSTM2L	0.315101160832745
151963	MB21D2	0.315026941458016
153830	RNF145	0.315025878693987
23151	GRAMD4	0.31501872436971
2009	EML1	0.314887618491984
2982	GUCY1A3	0.314846115003734
116983	ACAP3	0.31472633714215
10818	FRS2	0.314660955284784
111	ADCY5	0.314650391846318
51542	VPS54	0.314640702684582
5292	PIM1	0.314558839352787
124925	SEZ6	0.314547839102198
2593	GAMT	0.314521455623016
8545	CGGBP1	0.314455282026982
22902	RUFY3	0.314448146357162
7041	TGFB1I1	0.314374951429147
10900	RUNDC3A	0.314333609993876
353	APRT	0.314295757055691
79832	QSER1	0.314250213342607
728621	CCDC30	0.31422775613882
9419	CRIPT	0.314164427277643
9706	ULK2	0.314078894746149
4297	KMT2A	0.314075386552095	activated
10922	FASTK	0.313976561480006
5893	RAD52	0.313928542432033
7122	CLDN5	0.313928542432033
408	ARRB1	0.313844600350576
6667	SP1	0.313696261811242
23365	ARHGEF12	0.313608756889624	activated
7701	ZNF142	0.313582629477328
9409	PEX16	0.313566715585078
51310	SLC22A17	0.313557754860779
26152	ZNF337	0.313528939715239
9204	ZMYM6	0.313525813310371	activated
23348	DOCK9	0.313436410480601	activated
5876	RABGGTB	0.313428683715452
55255	WDR41	0.313309497068904
403341	ZBTB34	0.313261157682979
6489	ST8SIA1	0.313213909382882
5567	PRKACB	0.313192398684815
10435	CDC42EP2	0.313068440645434
8826	IQGAP1	0.313054475188331
30812	SOX8	0.312856294868179
4238	MFAP3	0.312820835446204
284217	LAMA1	0.312758795056452
494470	RNF165	0.312688501381176	activated
283149	BCL9L	0.312607611221428
9145	SYNGR1	0.312548101890204
400793	C1orf226	0.312502477008123
4088	SMAD3	0.312442727027807
7102	TSPAN7	0.312421061380143
10211	FLOT1	0.31235138039861
2744	GLS	0.312325355077222
55902	ACSS2	0.312318420720966
26146	TRAF3IP1	0.312270487376744
10695	CNPY3	0.312264033540699
83752	LONP2	0.312077085442657
55621	TRMT1	0.312016743120595
139818	DOCK11	0.31201488537192
57728	WDR19	0.311899956717182
11132	CAPN10	0.311872323087392
6942	TCF20	0.311865280138483
25769	SLC24A2	0.311839694129105
54619	CCNJ	0.311835144660527
2011	MARK2	0.311812176260033
4673	NAP1L1	0.311808854652192
1837	DTNA	0.311769426573652
50650	ARHGEF3	0.311728653078377
26229	B3GAT3	0.311713107975832
440	ASNS	0.311682164041966
64224	HERPUD2	0.311606662434819
6785	ELOVL4	0.311593200301715
6786	STIM1	0.311473435039018
1788	DNMT3A	0.311468922657318
114791	TUBGCP5	0.311376745159418
5495	PPM1B	0.311365106276115
5127	CDK16	0.311272469555222
4154	MBNL1	0.311197926560292
285600	KIAA0825	0.311153768758448
344148	NCKAP5	0.311096370134789
6196	RPS6KA2	0.310942510803388
195828	ZNF367	0.310798621267662
54020	SLC37A1	0.310781927823798
23397	NCAPH	0.310772058154209
91746	YTHDC1	0.310770422873932
3738	KCNA3	0.310741297856047
9475	ROCK2	0.310732886015664
65078	RTN4R	0.3106365965066
23413	NCS1	0.310597991376491
9590	AKAP12	0.310587494230894
6857	SYT1	0.31058298664602
10743	RAI1	0.310511245549465
84233	TMEM126A	0.310464626140817
2180	ACSL1	0.310375190184558
89795	NAV3	0.310257925491077
22926	ATF6	0.31003950712859
10992	SF3B2	0.31002684311998
2339	FNTA	0.310022524663178
11129	CLASRP	0.310021618440112
57670	KIAA1549	0.309900140752945
81577	GFOD2	0.309857972183424	repressed
56254	RNF20	0.309638445541183
6497	SKI	0.309591267123049
203286	ANKS6	0.309586925737589
29101	SSU72	0.309516764777076
466	ATF1	0.309467514873201
130132	RFTN2	0.309375031078593
55607	PPP1R9A	0.309317335909337	activated
4524	MTHFR	0.309273303167673
200734	SPRED2	0.309259281300959
23370	ARHGEF18	0.309258567124795
3429	IFI27	0.309250191696306
114991	ZNF618	0.309215914628408
7159	TP53BP2	0.309211389009267
57693	ZNF317	0.309158338648565
23493	HEY2	0.309147790252816
80758	PRR7	0.309139266670071
24147	FJX1	0.309123191703208
9107	MTMR6	0.309114875408767
1153	CIRBP	0.309111666386156
54758	KLHDC4	0.309111622268596
90007	MIDN	0.308971115032264
55668	GPATCH2L	0.308936550721063
56888	KCMF1	0.308911906452915
2788	GNG7	0.308794838965222
8853	ASAP2	0.308712593506865
22981	NINL	0.30867463548946
54906	FAM208B	0.308586483400742
596	BCL2	0.308530144231854
51608	GET4	0.3084305994835
1386	ATF2	0.308380837468142
10217	CTDSPL	0.308279751660859
9889	ZBED4	0.308265299925382
10299	MARCH6	0.30824699418306
84901	NFATC2IP	0.308221663164156
80315	CPEB4	0.308142338144059	activated
146330	FBXL16	0.308081801975186
55055	ZWILCH	0.308070689232605
84826	SFT2D3	0.307970699278242
23396	PIP5K1C	0.307967111494577
6829	SUPT5H	0.307884837930334
124930	ANKRD13B	0.307815615204947
5442	POLRMT	0.30777434372715
79598	CEP97	0.307694878510087	activated
1185	CLCN6	0.307666346692968
64393	ZMAT3	0.307651449826032
10912	GADD45G	0.307649716358386
53335	BCL11A	0.307595221481217
4675	NAP1L3	0.307567565387971
441531	PGAM4	0.307557670774629
7171	TPM4	0.307510401368976
10616	RBCK1	0.307365014061412
23710	GABARAPL1	0.307300970898822
55048	VPS37C	0.307279995585427
6421	SFPQ	0.307263504974973
54480	CHPF2	0.307093040544731
535	ATP6V0A1	0.307062600665089
81889	FAHD1	0.307046627296183
81555	YIPF5	0.306981780687478
5087	PBX1	0.306921505733081
11044	PAPD7	0.306917751916916
138046	RALYL	0.306763228729153
58508	KMT2C	0.306746760462033	activated
64067	NPAS3	0.3067316420942
7158	TP53BP1	0.306632994583142
157574	FBXO16	0.306536914189579
375323	LHFPL4	0.306496795293894
51291	GMIP	0.306476822669107
2898	GRIK2	0.306424265313903
7982	ST7	0.306255241220065
203054	ADCK5	0.306247778884702
9975	NR1D2	0.306242752152127
2175	FANCA	0.30606641085442
113510	HELQ	0.306016798326142
84520	C14orf142	0.30600194359353
84168	ANTXR1	0.305987939632913
10227	MFSD10	0.305904043314047
147991	DPY19L3	0.305848865038988
5452	POU2F2	0.305830007080586	activated
23067	SETD1B	0.305784041701298	activated
2785	GNG3	0.305779139438615
57535	KIAA1324	0.305754357532706
54492	NEURL1B	0.305639138933184
23648	SSBP3	0.305610849024881
27319	BHLHE22	0.305606395927575
54842	MFSD6	0.305598318210153
7371	UCK2	0.305555755448342
10564	ARFGEF2	0.305543269328411
5494	PPM1A	0.305500479901623
25977	NECAP1	0.305486637464722
222255	ATXN7L1	0.305483194065128
5569	PKIA	0.305466175732031
64857	PLEKHG2	0.305366541613184
90139	TSPAN18	0.305345722319949
5170	PDPK1	0.305285433852096
10114	HIPK3	0.305275008166147
79885	HDAC11	0.305258522869382
23171	GPD1L	0.305219535251744
51650	MRPS33	0.30513634463998
79676	OGFOD2	0.30512357003296
9349	RPL23	0.305117975605973
402055	SRRD	0.30508635676683
5502	PPP1R1A	0.305030592217168
9265	CYTH3	0.30502148282446
90362	FAM110B	0.304989054535693
114815	SORCS1	0.304928153374811
57282	SLC4A10	0.304864263392026	activated
83608	C18orf21	0.304806933206637
51559	NT5DC3	0.304781392344353
145567	TTC7B	0.304715350509227
84445	LZTS2	0.304639801376699
1352	COX10	0.304585355581479
26058	GIGYF2	0.304563788414255
29118	DDX25	0.30452571429641
23258	DENND5A	0.304481229215553
8999	CDKL2	0.304439699365049
3831	KLC1	0.304437164350781
8570	KHSRP	0.304363797299221
8932	MBD2	0.304341946185913
51278	IER5	0.304247722258963
8603	FAM193A	0.30420574311338
8498	RANBP3	0.304093883114855
51594	NBAS	0.304004227225933
63894	VIPAS39	0.303891948257308
80007	C10orf88	0.303867064927684
51184	GPN3	0.303844038247634
7456	WIPF1	0.303814278423365
1390	CREM	0.303809644302983
205564	SENP5	0.303728287956169
64759	TNS3	0.303689191062194
968	CD68	0.303609626767974
9701	PPP6R2	0.303448003099177
23080	AVL9	0.303423254534138
192670	AGO4	0.303421119427165
113419	TEX261	0.303414106992771
166378	SPATA5	0.30339636830996
65979	PHACTR4	0.303197578881692
1020	CDK5	0.303192824580555
25830	SULT4A1	0.303165694364237
54470	ARMCX6	0.303126045977557
87	ACTN1	0.30297815129127
64062	RBM26	0.302945051156721
826	CAPNS1	0.302930118209248
79753	SNIP1	0.302922571769066
9990	SLC12A6	0.302901190089415
9665	KIAA0430	0.302886986047676
8541	PPFIA3	0.30284414755202
55334	SLC39A9	0.302786728769415
90809	TMEM55B	0.302613690724507
4208	MEF2C	0.302600720220778
83638	C11orf68	0.302534724147333
26052	DNM3	0.302528785278449	activated
23438	HARS2	0.302508131524
23313	KIAA0930	0.302504739222816
124222	PAQR4	0.30244509482947	repressed
1374	CPT1A	0.302444654078168
6671	SP4	0.302387798767091
51441	YTHDF2	0.302368234279689
41	ASIC1	0.302323642275576
5862	RAB2A	0.302307074373841
2483	FRG1	0.302289130059787
158471	PRUNE2	0.302278672760802
23405	DICER1	0.302165723464675	activated
56980	PRDM10	0.301968458943905
5789	PTPRD	0.301968362957764	activated
55166	CENPQ	0.301931169434688
29094	LGALSL	0.301923631221568
29967	LRP12	0.301919842981161
2334	AFF2	0.301896915404851
84954	MPND	0.301875499509954
147807	ZNF524	0.301836094496369
7866	IFRD2	0.301801270838842
6659	SOX4	0.301691504675729
30837	SOCS7	0.301687913519776
2961	GTF2E2	0.301558318532547
253143	PRR14L	0.30155236215142
26273	FBXO3	0.301545515361055
55308	DDX19A	0.301526977344602
56904	SH3GLB2	0.301502388371707
83985	SPNS1	0.301492692972378
79147	FKRP	0.301445865775242
637	BID	0.301358647145287
57655	GRAMD1A	0.301353003365558
5600	MAPK11	0.301347085922445
146923	RUNDC1	0.301271856795195
3984	LIMK1	0.301252402483738
51548	SIRT6	0.30124999475895
55860	ACTR10	0.301162720174067
26091	HERC4	0.301027911000889
1874	E2F4	0.300993390873314
4026	LPP	0.300906602939228	activated
256435	ST6GALNAC3	0.300845869512667
22888	UBOX5	0.300816500981361
23023	TMCC1	0.300809712299548
10090	UST	0.300806536578777
7248	TSC1	0.30075554702379
57149	LYRM1	0.300754146898934
3899	AFF3	0.300737467558134
22887	FOXJ3	0.300682627895329
54433	GAR1	0.300682338219743
22858	ICK	0.300587932925741
400	ARL1	0.300564857992749
22906	TRAK1	0.300538750813241
54467	ANKIB1	0.300426464011028
29979	UBQLN1	0.300296943315198
5362	PLXNA2	0.300278482202298
5575	PRKAR1B	0.300170068792747
23025	UNC13A	0.300026841836569	activated
57175	CORO1B	0.300013930531433
55171	TBCCD1	0.299970725852147
21	ABCA3	0.299967797389316
57621	ZBTB2	0.299932974475481
26249	KLHL3	0.299928060865012
50937	CDON	0.299923121108701
144717	FAM109A	0.29983261344173
1471	CST3	0.299686836255815
2935	GSPT1	0.299683812137355
54934	KANSL2	0.299642546785937
372	ARCN1	0.299558627491382
1654	DDX3X	0.29954884678714
23157	SEPT6	0.299536807617871
7022	TFAP2C	0.299535373949764
114790	STK11IP	0.299521929435269
196394	AMN1	0.299498003818014
4856	NOV	0.29947602861247
25932	CLIC4	0.299383936277916
1870	E2F2	0.299370709146318
80055	PGAP1	0.299351411750879
9693	RAPGEF2	0.299251526079057
5799	PTPRN2	0.299192413814674
23090	ZNF423	0.299116088152703
1121	CHM	0.299035372386247
60481	ELOVL5	0.29902457037666
56953	NT5M	0.298977591248937
9731	CEP104	0.298875990353732
65268	WNK2	0.298861566631956
84148	KAT8	0.298854244265892	repressed
54801	HAUS6	0.298850330864852
57144	PAK7	0.298838784305058
8313	AXIN2	0.298824442849406
81029	WNT5B	0.298813728005453
64943	NT5DC2	0.298795748792552
11214	AKAP13	0.298785313199507	activated
9968	MED12	0.298746834721072	activated
5894	RAF1	0.29872539696537
1297	COL9A1	0.298724752927322
84269	CHCHD5	0.29859795449463
8703	B4GALT3	0.29859333734591
10607	TBL3	0.29854847727448
10904	BLCAP	0.298546291102186
9202	ZMYM4	0.298515183354015
81928	CABLES2	0.298209468589986
286826	LIN9	0.298142140037156
3837	KPNB1	0.298000036920126
9785	DHX38	0.297994654836198
65009	NDRG4	0.297976407031895
6618	SNAPC2	0.29795893818844	repressed
8732	RNGTT	0.297930190082027
2869	GRK5	0.297910315982451
24145	PANX1	0.297794706425298
55213	RCBTB1	0.297759326979808
4628	MYH10	0.297715860680308	activated
23217	ZFR2	0.2977041172762
7776	ZNF236	0.297680140580813
22836	RHOBTB3	0.297667841478119
84153	RNASEH2C	0.297641487547363
51339	DACT1	0.297637839949942
54841	BIVM	0.297622676742292
63974	NEUROD6	0.297570478827192
51455	REV1	0.297556578508454
7078	TIMP3	0.297553147674831
6272	SORT1	0.297509202991032
201475	RAB12	0.297495591959027
10507	SEMA4D	0.297370081555994
84626	KRBA1	0.297338958814103
8861	LDB1	0.297329246807936
79726	WDR59	0.297274957771394
51466	EVL	0.297151744252345
2729	GCLC	0.297085140856812
142891	SAMD8	0.297075192011922
51324	SPG21	0.297066811527613	repressed
56127	PCDHB9	0.29704166435104
55108	BSDC1	0.29697733350388
339287	MSL1	0.29695019816959
26260	FBXO25	0.296944765736002
2316	FLNA	0.296839219269189
55973	BCAP29	0.296753371082255
9980	DOPEY2	0.296736191037478
57554	LRRC7	0.296707456889519
8504	PEX3	0.296633469870295
23150	FRMD4B	0.296601951351478
4580	MTX1	0.29659006596187
11020	IFT27	0.296571611895799	repressed
29896	TRA2A	0.296525557962258
9110	MTMR4	0.296490305704583
85453	TSPYL5	0.29644721804645
56902	PNO1	0.296395738972841
29904	EEF2K	0.296277686709929
64844	MARCH7	0.296176672216732
253635	GPATCH11	0.296166713615127
85460	ZNF518B	0.296147297747469
25853	DCAF12	0.296114489179548
11101	ATE1	0.296113030348389
257019	FRMD3	0.296059176394003
7750	ZMYM2	0.295923189755913
23528	ZNF281	0.295886485775594
571	BACH1	0.295830215568708
65992	DDRGK1	0.295777163620662
81606	LBH	0.295760657077599
64779	MTHFSD	0.295748513829051
80818	ZNF436	0.295669311549024
54751	FBLIM1	0.295594397174283
51762	RAB8B	0.29547308643746
1105	CHD1	0.295404084158825
57176	VARS2	0.29538464418789
7546	ZIC2	0.295384381157416
353274	ZNF445	0.295376752177675
54206	ERRFI1	0.29533764597494
283464	GXYLT1	0.295201877743593	activated
55341	LSG1	0.295099215452595
5763	PTMS	0.29491402758552
388419	BTBD17	0.294902599586762
6137	RPL13	0.294653348170363	repressed
80012	PHC3	0.294641828111173	activated
10367	MICU1	0.294506095730352
81559	TRIM11	0.294361997377177
25921	ZDHHC5	0.294338055289452
2997	GYS1	0.294268707680988
5910	RAP1GDS1	0.294228497122443
7169	TPM2	0.294127286814604
56894	AGPAT3	0.293945467478722
9637	FEZ2	0.293932444331691
344558	SH3RF3	0.293926195521055
22864	R3HDM2	0.293902591931976
4756	NEO1	0.293853387027097
100132074	FOXO6	0.293813689525315
57610	RANBP10	0.293809602586496
80267	EDEM3	0.293791759574907
57701	NCKAP5L	0.293664655838944
10447	FAM3C	0.293594717543289
23175	LPIN1	0.2935337577817
149041	RC3H1	0.293505692179304
84620	ST6GAL2	0.293422057304595
5101	PCDH9	0.293389432653067
57715	SEMA4G	0.293372798813712
2580	GAK	0.29330510761485
55167	MSL2	0.293225276714001
90060	CCDC120	0.293186310796184
10608	MXD4	0.293145239259545
79809	TTC21B	0.293131483447707
6502	SKP2	0.293121311176767
9392	TGFBRAP1	0.293120569808587
5613	PRKX	0.293115013091327
5000	ORC4	0.293091055523264
9739	SETD1A	0.29308467618217
7804	LRP8	0.292949469766251
5067	CNTN3	0.292948604214717
9670	IPO13	0.292908533574814
3338	DNAJC4	0.292833655958211
55893	ZNF395	0.292724975454578
57477	SHROOM4	0.292653737826977
23481	PES1	0.292638491841148
84266	ALKBH7	0.292621928257973
23352	UBR4	0.292588232589348	activated
5929	RBBP5	0.292553742505583
23074	UHRF1BP1L	0.292504430573624
1428	CRYM	0.292494243804722
2309	FOXO3	0.292331813269885
116151	FAM210B	0.292310439738523
342357	ZKSCAN2	0.292199388691968	activated
200845	KCTD6	0.292142206550661
161823	ADAL	0.292136793822836
23162	MAPK8IP3	0.292108581314035
22809	ATF5	0.292102790052307
7220	TRPC1	0.291936377053449
329	BIRC2	0.291870149311753
51097	SCCPDH	0.291867521799997
51720	UIMC1	0.291841001004605
84330	ZNF414	0.291840436643883
7726	TRIM26	0.291783354208231
2194	FASN	0.291722110576335
22856	CHSY1	0.291709637505271
9415	FADS2	0.291703013078838
4779	NFE2L1	0.291697959887221
25925	ZNF521	0.291696893242223
9858	PPP1R26	0.291694875928997
8314	BAP1	0.291549876460083
376267	RAB15	0.291528426467086
81545	FBXO38	0.29151479195123
58499	ZNF462	0.291505783561016	activated
57722	IGDCC4	0.291469863102991
155061	ZNF746	0.291460805898346
9810	RNF40	0.291446072591048
491	ATP2B2	0.291409483060953
3912	LAMB1	0.291408129784539
116986	AGAP2	0.291328669287415
55705	IPO9	0.291280842806617
23708	GSPT2	0.291271881529841
26084	ARHGEF26	0.291264082076862
9928	KIF14	0.291219583452947
55435	AP1AR	0.291214133783678
9926	LPGAT1	0.291189558621958
51715	RAB23	0.291022377695641
130074	FAM168B	0.291008072212847
6880	TAF9	0.290991190326477
7390	UROS	0.290972467233099
23223	RRP12	0.290959745095254
51263	MRPL30	0.290918290735875
84964	ALKBH6	0.290749613735728
8569	MKNK1	0.290719005391795
57616	TSHZ3	0.29054773772307	activated
5768	QSOX1	0.29049582545029
57404	CYP20A1	0.290474941459319
124808	CCDC43	0.290445249713476
2778	GNAS	0.290323955846339
3454	IFNAR1	0.290276267635959
7494	XBP1	0.290251696008178	repressed
4781	NFIB	0.290092437540241
10174	SORBS3	0.290087500097307
1186	CLCN7	0.289960666954125
5519	PPP2R1B	0.289909950376809
6904	TBCD	0.289888819654004
7249	TSC2	0.289878539069586
54476	RNF216	0.289860851405648
55914	ERBB2IP	0.289806043319005
127544	RNF19B	0.289792433009693
23347	SMCHD1	0.289791081938319
3767	KCNJ11	0.289751412423408
23061	TBC1D9B	0.289691734325746
80324	PUS1	0.289680485572087
55625	ZDHHC7	0.289590674840239
55652	SLC48A1	0.289587921421897
4082	MARCKS	0.289583097266827
5325	PLAGL1	0.289545567420431
5532	PPP3CB	0.289522809644904
55313	CPPED1	0.289493737880428
151195	CCNYL1	0.289491730153955
84629	TNRC18	0.289407438225504
55031	USP47	0.289394146839194
84085	FBXO30	0.289346955635303
4905	NSF	0.289320186834274
10773	ZBTB6	0.28926866488482
1798	DPAGT1	0.289105157217049
1212	CLTB	0.2890616565996
83743	GRWD1	0.289060140745721
6136	RPL12	0.289017450219656
4931	NVL	0.289015142335866
114569	MAL2	0.289014583959433
7466	WFS1	0.288997828038457
2885	GRB2	0.288975198843368
6521	SLC4A1	0.288915426115505
283209	PGM2L1	0.28887884177751
80025	PANK2	0.288867587917284
219	ALDH1B1	0.288839188767562
51141	INSIG2	0.288816211939516
6657	SOX2	0.288706707553081
10972	TMED10	0.288703672413279
9517	SPTLC2	0.28864929106446
1785	DNM2	0.288534963366031
338692	ANKRD13D	0.28852682226954
51635	DHRS7	0.288523615829782
23549	DNPEP	0.288370455390167
7392	USF2	0.288325760057028
285704	RGMB	0.288264122732107
8662	EIF3B	0.288235575788163
8243	SMC1A	0.288226534715432
149420	PDIK1L	0.288210478474696
9865	TRIL	0.288207047103388
55100	WDR70	0.288173956700936
57596	BEGAIN	0.287983267836313
11076	TPPP	0.287962339881443
3419	IDH3A	0.287913854291997
23262	PPIP5K2	0.287898462243417
10266	RAMP2	0.287872214018418
829	CAPZA1	0.28785378263304
5864	RAB3A	0.287845292661722
121227	LRIG3	0.287830888407471
93611	FBXO44	0.28780888474216
51105	PHF20L1	0.287770229206713	activated
26047	CNTNAP2	0.287763121548411
56927	GPR108	0.287733885031719
7832	BTG2	0.287688418190014	repressed
11073	TOPBP1	0.287680309525516
200916	RPL22L1	0.287644071572787	repressed
2585	GALK2	0.287575154131231
80142	PTGES2	0.28756082501103
9497	SLC4A7	0.287499636995136
288	ANK3	0.287470308623306	activated
5586	PKN2	0.287425889096314
10939	AFG3L2	0.287415507851565
7760	ZNF213	0.287311864252214	repressed
3705	ITPK1	0.287290948217984
394	ARHGAP5	0.287283804207781
9656	MDC1	0.287230235199256
28951	TRIB2	0.287153426463522
[truncated: 7,170 more rows]

## Sheet: Supplemental Table S6D
Supplemental Table S6D. GO terms with FDR ≤0.1 enriched for CHD8-activated target genes.
GOBP ID	Name	Odds ratio	P value	FDR	Number of overlapping genes	Number of genes in term
GO:0086010	membrane depolarization during action potential	60.497	5.29559e-10	1.80685e-06	8	12
GO:0001508	action potential	14.0122	7.94587e-09	1.35557e-05	11	35
GO:0035637	multicellular organismal signaling	13.2484	5.75331e-08	6.54343e-05	10	33
GO:0042391	regulation of membrane potential	5.48656	1.3289e-07	0.000113355	17	113
GO:0051899	membrane depolarization	9.33145	2.33511e-07	0.000159348	11	47
GO:0023061	signal release	6.21807	2.74692e-06	0.00156208	12	71
GO:0007269	neurotransmitter secretion	7.60744	3.89602e-06	0.00176567	10	50
GO:0019226	transmission of nerve impulse	14.0864	4.18518e-06	0.00176567	7	22
GO:0034765	regulation of ion transmembrane transport	4.61306	4.6574e-06	0.00176567	15	115
GO:0022008	neurogenesis	2.14579	6.37537e-06	0.00210689	50	806
GO:0034762	regulation of transmembrane transport	4.43377	7.14776e-06	0.00210689	15	119
GO:0070509	calcium ion import	29.9886	7.99076e-06	0.00210689	5	10
GO:0051568	histone H3-K4 methylation	12.4306	8.02743e-06	0.00210689	7	24
GO:0030534	adult behavior	5.31123	1.13238e-05	0.00275976	12	81
GO:0007010	cytoskeleton organization	2.43053	1.40854e-05	0.00307514	34	477
GO:0015833	peptide transport	11.1174	1.44204e-05	0.00307514	7	26
GO:0034968	histone lysine methylation	6.6551	2.9329e-05	0.0058865	9	50
GO:0048699	generation of neurons	2.05548	3.3782e-05	0.00640357	46	764
GO:0030030	cell projection organization	2.19749	3.77592e-05	0.00671094	38	587
GO:0007626	locomotory behavior	4.27257	3.93373e-05	0.00671094	13	106
GO:0006836	neurotransmitter transport	5.5229	4.39692e-05	0.00714396	10	65
GO:0042886	amide transport	8.79812	5.0077e-05	0.00746841	7	31
GO:0001505	regulation of neurotransmitter levels	5.42378	5.03439e-05	0.00746841	10	66
GO:0002790	peptide secretion	11.281	5.5938e-05	0.00777495	6	22
GO:0051647	nucleus localization	16.6627	5.69677e-05	0.00777495	5	14
GO:0000226	microtubule cytoskeleton organization	3.02256	6.83335e-05	0.00896746	19	213
GO:0003008	system process	2.2948	8.10683e-05	0.0102446	31	455
GO:0050877	neurological system process	2.60392	0.000108465	0.0128356	23	297
GO:0016568	chromatin modification	2.39949	0.000109095	0.0128356	27	378
GO:0043269	regulation of ion transport	3.11013	0.000114533	0.0130262	17	185
GO:0006325	chromatin organization	2.30133	0.000124617	0.013716	29	423
GO:0051049	regulation of transport	2.02008	0.000180335	0.0192282	38	632
GO:0016571	histone methylation	5.04662	0.000190813	0.019682	9	63
GO:0071709	membrane assembly	19.9353	0.000201896	0.019682	4	10
GO:0080182	histone H3-K4 trimethylation	19.9353	0.000201896	0.019682	4	10
GO:0030073	insulin secretion	11.5342	0.000218858	0.0207428	5	18
GO:0032879	regulation of localization	1.84441	0.000242686	0.0223796	48	878
GO:0048468	cell development	1.86914	0.000272509	0.0244684	45	810
GO:0070588	calcium ion transmembrane transport	5.36942	0.000294268	0.0257447	8	53
GO:0008344	adult locomotory behavior	5.03272	0.000433196	0.0369517	8	56
GO:0030072	peptide hormone secretion	9.37051	0.000479466	0.039063	5	21
GO:0042552	myelination	4.9291	0.000489859	0.039063	8	57
GO:0046903	secretion	2.55059	0.000492295	0.039063	19	248
GO:0006928	cellular component movement	1.89968	0.000526192	0.0408038	38	667
GO:0007272	ensheathment of neurons	4.83037	0.000552384	0.0409725	8	58
GO:0008366	axon ensheathment	4.83037	0.000552384	0.0409725	8	58
GO:0006200	ATP catabolic process	2.76579	0.000580906	0.04109	16	193
GO:0048812	neuron projection morphogenesis	2.2425	0.0005903	0.04109	24	355
GO:0044728	DNA methylation or demethylation	6.67906	0.000613094	0.04109	6	33
GO:0040029	regulation of gene expression, epigenetic	3.55182	0.000618303	0.04109	11	105
GO:0019932	second-messenger-mediated signaling	4.73437	0.000621211	0.04109	8	59
GO:0009128	purine nucleoside monophosphate catabolic process	2.73427	0.000650311	0.04109	16	195
GO:0009158	ribonucleoside monophosphate catabolic process	2.73427	0.000650311	0.04109	16	195
GO:0009169	purine ribonucleoside monophosphate catabolic process	2.73427	0.000650311	0.04109	16	195
GO:0040011	locomotion	1.98133	0.000677652	0.0415122	32	536
GO:0035556	intracellular signal transduction	1.75909	0.000681325	0.0415122	47	894
GO:0009125	nucleoside monophosphate catabolic process	2.70344	0.00072669	0.0434994	16	197
GO:0031175	neuron projection development	2.0935	0.000764312	0.0449626	27	427
GO:0007416	synapse assembly	6.21726	0.000850469	0.0472159	6	35
GO:0007417	central nervous system development	1.99411	0.000865506	0.0472159	30	498
GO:0044091	membrane biogenesis	11.9573	0.000867406	0.0472159	4	14
GO:0048858	cell projection morphogenesis	2.0448	0.000870183	0.0472159	28	453
GO:0050808	synapse organization	4.00133	0.000871805	0.0472159	9	77
GO:0048667	cell morphogenesis involved in neuron differentiation	2.21057	0.000891509	0.0475286	23	344
GO:0007268	synaptic transmission	2.29155	0.000943447	0.0495237	21	303
GO:0007422	peripheral nervous system development	6.00978	0.000992934	0.0513317	6	36
GO:0007610	behavior	2.45151	0.00102045	0.0519668	18	243
GO:0030182	neuron differentiation	1.90599	0.00103692	0.0520291	33	573
GO:0044057	regulation of system process	3.08902	0.00110672	0.0546195	12	130
GO:0046879	hormone secretion	7.49234	0.00112442	0.0546195	5	25
GO:0007163	establishment or maintenance of cell polarity	3.83117	0.00115053	0.0546195	9	80
GO:0017156	calcium ion-dependent exocytosis	10.8751	0.00115258	0.0546195	4	15
GO:0048666	neuron development	1.96933	0.00122329	0.057176	29	486
GO:0006479	protein methylation	3.77762	0.00125801	0.0572309	9	81
GO:0008213	protein alkylation	3.77762	0.00125801	0.0572309	9	81
GO:0032990	cell part morphogenesis	1.98584	0.00129542	0.0581575	28	465
GO:0009914	hormone transport	7.13574	0.00135534	0.0597049	5	26
GO:0032940	secretion by cell	2.53173	0.00136488	0.0597049	16	209
GO:0007017	microtubule-based process	2.21038	0.00142025	0.0613402	21	313
GO:0051276	chromosome organization	1.88213	0.00144673	0.061703	32	561
GO:0007628	adult walking behavior	6.81147	0.00161944	0.0682163	5	27
GO:0009790	embryo development	1.90375	0.00166055	0.069095	30	519
GO:0010256	endomembrane system organization	2.4665	0.00174482	0.0712284	16	214
GO:0043967	histone H4 acetylation	5.30033	0.00175357	0.0712284	6	40
GO:0007267	cell-cell signaling	2.04892	0.00180945	0.0724294	24	385
GO:0051493	regulation of cytoskeleton organization	2.45383	0.00183059	0.0724294	16	215
GO:0007409	axonogenesis	2.15679	0.0018655	0.0724294	21	320
GO:0035023	regulation of Rho protein signal transduction	3.05794	0.00186805	0.0724294	11	120
GO:0018023	peptidyl-lysine trimethylation	9.19844	0.00190833	0.0729193	4	17
GO:0006816	calcium ion transport	3.5301	0.00192343	0.0729193	9	86
GO:0016570	histone modification	2.35004	0.00206802	0.0775394	17	238
GO:0006304	DNA modification	5.00522	0.00226898	0.0832473	6	42
GO:0016569	covalent chromatin modification	2.31771	0.00236034	0.0832473	17	241
GO:0007420	brain development	2.00262	0.00237399	0.0832473	24	393
GO:0000281	mitotic cytokinesis	8.54121	0.00239104	0.0832473	4	18
GO:0014044	Schwann cell development	8.54121	0.00239104	0.0832473	4	18
GO:0031122	cytoplasmic microtubule organization	8.54121	0.00239104	0.0832473	4	18
GO:0043001	Golgi to plasma membrane protein transport	8.54121	0.00239104	0.0832473	4	18
GO:0000904	cell morphogenesis involved in differentiation	1.99136	0.00253654	0.0874209	24	395
GO:0021675	nerve development	5.99292	0.00263844	0.0900237	5	30

## Sheet: Supplemental Table S6E
Supplemental Table S6E. GO terms with FDR ≤0.1 enriched for CHD8-repressed target genes.
GOBP ID	Name	Odds ratio	P value	FDR	Number of overlapping genes	Number of genes in term
GO:0031145	anaphase-promoting complex-dependent proteasomal ubiquitin-dependent protein catabolic process	6.21807	2.74692e-06	0.00937249	12	71
GO:0051438	regulation of ubiquitin-protein transferase activity	5.15987	1.46259e-05	0.0167773	12	83
GO:0051443	positive regulation of ubiquitin-protein transferase activity	5.49288	1.95418e-05	0.0167773	11	72
GO:0051340	regulation of ligase activity	4.94995	2.11514e-05	0.0167773	12	86
GO:0051351	positive regulation of ligase activity	5.23364	2.90236e-05	0.0167773	11	75
GO:0000075	cell cycle checkpoint	3.34528	3.15441e-05	0.0167773	18	184
GO:0007093	mitotic cell cycle checkpoint	3.8039	3.61645e-05	0.0167773	15	136
GO:0031398	positive regulation of protein ubiquitination	4.27257	3.93373e-05	0.0167773	13	106
GO:0051439	regulation of ubiquitin-protein ligase activity involved in mitotic cell cycle	5.14569	7.43993e-05	0.0282056	10	69
GO:0019083	viral transcription	5.68012	8.61394e-05	0.0293908	9	57
GO:0010948	negative regulation of cell cycle process	3.11013	0.000114533	0.0344849	17	185
GO:1901991	negative regulation of mitotic cell cycle phase transition	3.37845	0.000121283	0.0344849	15	151
GO:1901988	negative regulation of cell cycle phase transition	3.32873	0.000140664	0.0346937	15	153
GO:0006415	translational termination	5.24118	0.000148055	0.0346937	9	61
GO:0006414	translational elongation	4.66819	0.000152522	0.0346937	10	75
GO:0031577	spindle checkpoint	7.03384	0.00016566	0.035327	7	37
GO:1901990	regulation of mitotic cell cycle phase transition	2.98336	0.000180195	0.0361663	17	192
GO:0019080	viral gene expression	4.95413	0.00021577	0.0370473	9	64
GO:0051437	positive regulation of ubiquitin-protein ligase activity involved in mitotic cell cycle	4.95413	0.00021577	0.0370473	9	64
GO:1901987	regulation of cell cycle phase transition	2.93208	0.000217159	0.0370473	17	195
GO:0044033	multi-organism metabolic process	4.77838	0.00027386	0.0444958	9	66
GO:0031396	regulation of protein ubiquitination	3.11896	0.000416953	0.0646656	14	151
GO:0000278	mitotic cell cycle	1.93771	0.000508031	0.0703699	36	619
GO:0022411	cellular component disassembly	2.61841	0.000509038	0.0703699	18	229
GO:0071174	mitotic spindle checkpoint	6.93659	0.000515606	0.0703699	6	32
GO:0007346	regulation of mitotic cell cycle	2.45179	0.000568688	0.0746294	20	271
GO:0051436	negative regulation of ubiquitin-protein ligase activity involved in mitotic cell cycle	4.64313	0.000696801	0.0845438	8	60
GO:0071822	protein complex subunit organization	1.83761	0.000705336	0.0845438	40	725
GO:0043624	cellular protein complex disassembly	4.12342	0.000718572	0.0845438	9	75
GO:0007077	mitotic nuclear envelope disassembly	6.21726	0.000850469	0.0959548	6	35
GO:0006614	SRP-dependent cotranslational protein targeting to membrane	4.00133	0.000871805	0.0959548	9	77
GO:0051352	negative regulation of ligase activity	4.3883	0.000969017	0.0983553	8	63
GO:0051444	negative regulation of ubiquitin-protein transferase activity	4.3883	0.000969017	0.0983553	8	63
GO:0043933	macromolecular complex subunit organization	1.74357	0.000988983	0.0983553	45	860
GO:0006613	cotranslational protein targeting to membrane	3.88625	0.0010506	0.0983553	9	79
GO:0045047	protein targeting to ER	3.83117	0.00115053	0.0983553	9	80
GO:0072599	establishment of protein localization to endoplasmic reticulum	3.83117	0.00115053	0.0983553	9	80
GO:0030397	membrane disassembly	5.81425	0.00115305	0.0983553	6	37
GO:0045839	negative regulation of mitosis	5.81425	0.00115305	0.0983553	6	37
GO:0051081	nuclear envelope disassembly	5.81425	0.00115305	0.0983553	6	37
