# Supplementary material for: Coexpression enrichment analysis at the single-cell level reveals convergent defects in neural progenitor cells and their cell-type transitions in neurodevelopmental disorders
Source: HighWire-hosted journal article supplement (doi:10.1101/gr.254987.119), 2020-06-01
Supplement: Supplemental_Table_S7.xlsx [file Supplemental_Table_S7.xlsx]

## Sheet: Supplemental Table S7
Supplemental Table S7. Spearman’s correlation, co-expression network, and degree in NPCs for ASD genes with dnLoF mutations, and those in interneurons for epilepsy genes with dnMis mutations.
(A) Spearman’s correlation with dnLoF-ASD genes in NPCs for ASD genes with dnLoF mutations.
(B) Spearman’s correlation with dnMis-Epi genes in interneurons for epilepsy genes with dnMis mutations.
(C) Co-expression network of ASD genes with dnLoF mutations in NPCs.
(D) Co-expression network of epilepsy genes with dnMis mutations in interneurons.
(E) Co-expression degree in the NPC network of ASD genes with dnLoF mutations.
(F) Co-expression degree in the interneuron network of epilepsy genes with dnMis mutations.

## Sheet: Supplemental Table S7A
Supplemental Table S7A. Spearman’s correlation with dnLoF-ASD genes in NPCs for ASD genes with dnLoF mutations.
Column "dnLoF-ASD": 3+=at least three dnLoF mutations, 2=two dnLoF mutations, 1=only one dnLoF mutation, and 0=no dnLoF mutation.
Gene ID	Symbol	Spearman’s correlation	dnLoF-ASD
3897	L1CAM	0.29561770218728	1
862	RUNX1T1	0.294359320340869	0
51617	HMP19	0.291634896241948	0
1809	DPYSL3	0.281888183141516	0
4761	NEUROD2	0.278887671674429	0
2891	GRIA2	0.278733248604008	1
115207	KCTD12	0.276669426687859	0
9379	NRXN2	0.276538213026337	0
11075	STMN2	0.273101394074581	0
55450	CAMK2N1	0.271927893946279	0
6709	SPTAN1	0.269668913006397	0
2899	GRIK3	0.269349379659006	0
338707	B4GALNT4	0.268462366670443	0
116983	ACAP3	0.268440565603116	0
27445	PCLO	0.267765336415102	0
1995	ELAVL3	0.267591055094953	0
60468	BACH2	0.26742486318551	0
5864	RAB3A	0.266765687975257	0
55800	SCN3B	0.266379203610476	0
7532	YWHAG	0.264844012192325	0
777	CACNA1E	0.264691537810868	0
79966	SCD5	0.260909547714644	0
4208	MEF2C	0.259977175893373	0
1641	DCX	0.259563617076836	0
27087	B3GAT1	0.25815620722893	0
9213	XPR1	0.256196960213941	0
4008	LMO7	0.255490676553557	0
388228	SBK1	0.254211322888141	0
729993	SHISA9	0.25390726232602	0
54331	GNG2	0.253104242001083	0
56853	CELF4	0.252881828704369	1
79158	GNPTAB	0.252567617500919	0
440823	MIAT	0.252355300002376	1
57595	PDZD4	0.251882741039266	0
6860	SYT4	0.251870076283606	0
23543	RBFOX2	0.251144059919078	0
57555	NLGN2	0.250995337417517	0
100885776	UGDH-AS1	0.250555619387847	0
9920	KBTBD11	0.250390430844742	0
5577	PRKAR2B	0.250273066016542	0
26960	NBEA	0.249963038222942	1
57030	SLC17A7	0.249820503811993	0
2909	ARHGAP35	0.248873079304657	0
5789	PTPRD	0.248832150707581	0
9839	ZEB2	0.24878378578406	0
1107	CHD3	0.247953912881458	0
23114	NFASC	0.246196354110119	0
56907	SPIRE1	0.24591065487933	0
3899	AFF3	0.245318357866192	0
23046	KIF21B	0.243989247581371	0
220164	DOK6	0.243960633549303	0
56917	MEIS3	0.243959057035197	0
773	CACNA1A	0.24372871850393	0
283209	PGM2L1	0.243652685885412	0
10777	ARPP21	0.243284828069517	0
64919	BCL11B	0.243140151785314	0
4684	NCAM1	0.242991181723603	0
4137	MAPT	0.242933719841713	0
1759	DNM1	0.242861173096934	0
29	ABR	0.242803113136582	0
55885	LMO3	0.242781193094517	0
9892	SNAP91	0.242758757027615	0
166614	DCLK2	0.242383190112432	0
199731	CADM4	0.241709247940356	0
80790	CMIP	0.241676887912172	0
7267	TTC3	0.241400355857358	0
6503	SLA	0.241316720755059	0
9201	DCLK1	0.240919241505094	0
22941	SHANK2	0.240748993620263	2
123096	SLC25A29	0.240635273901072	0
1501	CTNND2	0.240536309014405	0
60680	CELF5	0.240290216533435	0
2835	GPR12	0.240204898720478	0
56978	PRDM8	0.240084566594192	0
10297	APC2	0.239981396660679	0
27319	BHLHE22	0.239137839056565	0
10983	CCNI	0.238986271148654	0
6304	SATB1	0.238978531972692	0
478	ATP1A3	0.238890242621096	0
6585	SLIT1	0.238747872321943	0
23057	NMNAT2	0.23841744620208	0
124925	SEZ6	0.238411739590179	0
23637	RABGAP1	0.238373339616203	0
128434	VSTM2L	0.238354730707964	0
149603	RNF187	0.238295960998619	0
84206	MEX3B	0.238282499914816	0
5064	PALM	0.238231575657658	0
51592	TRIM33	0.238097443671815	0
4613	MYCN	0.237971631848715	0
107	ADCY1	0.237943342876008	0
57142	RTN4	0.237846178297665	0
83992	CTTNBP2	0.237751705488417	0
10409	BASP1	0.237611241398253	0
9026	HIP1R	0.237539048242052	0
10900	RUNDC3A	0.23752258941221	0
6857	SYT1	0.237241401555629	0
4135	MAP6	0.237225977969841	0
150244	ZDHHC8P1	0.237191469278843	0
10656	KHDRBS3	0.23718048243113	0
84629	TNRC18	0.236730583681191	1
53358	SHC3	0.236657876242663	0
9649	RALGPS1	0.236575045684369	0
203259	FAM219A	0.236056524834346	0
5775	PTPN4	0.235990542783119	0
1954	MEGF8	0.235900222123631	0
3977	LIFR	0.235773030797673	0
201475	RAB12	0.235632564148921	0
6616	SNAP25	0.23531989102171	0
26053	AUTS2	0.23526028751446	0
55531	ELMOD1	0.235136109176362	0
8851	CDK5R1	0.234832468630793	0
7874	USP7	0.234801183910898	0
26012	NSMF	0.234734100515522	0
2044	EPHA5	0.234186167912429	0
2596	GAP43	0.234136288512884	0
120114	FAT3	0.234124757692262	0
23040	MYT1L	0.233984445916092	2
8943	AP3D1	0.233678714527682	0
55704	CCDC88A	0.233461012006119	0
6666	SOX12	0.233432583841114	0
10659	CELF2	0.233245538888134	1
3797	KIF3C	0.232466565858994	0
288	ANK3	0.232326070387976	0
146330	FBXL16	0.231983939154442	0
2562	GABRB3	0.231867126743565	1
23263	MCF2L	0.231783007527805	0
1387	CREBBP	0.2316903052538	0
23077	MYCBP2	0.231370595534117	0
8499	PPFIA2	0.230933317402848	0
57604	KIAA1456	0.230812955089285	0
401647	GOLGA7B	0.230803303813474	0
3321	IGSF3	0.230602862299652	1
9732	DOCK4	0.230543632277584	0
116988	AGAP3	0.230365999972573	0
1646	AKR1C2	0.230355043148452	0
64762	GAREM	0.23003544482441	1
333	APLP1	0.229917452234839	0
63027	SLC22A23	0.229842850819482	0
55700	MAP7D1	0.229820579172689	0
26115	TANC2	0.228641472730454	1
65998	C11orf95	0.228629784416092	0
25862	USP49	0.228554984148885	0
94030	LRRC4B	0.228414397359864	0
23271	CAMSAP2	0.228404401076493	0
1268	CNR1	0.228314635730255	0
59283	CACNG8	0.228248167414409	0
10116	FEM1B	0.228104713598825	0
51339	DACT1	0.228102975386269	0
254263	CNIH2	0.228062973554878	0
287	ANK2	0.228026006919799	3+
204962	SLC44A5	0.228009965232164	0
8609	KLF7	0.227886567781601	0
55585	UBE2Q1	0.227771738146226	0
6328	SCN3A	0.227558524764038	0
30000	TNPO2	0.227548061124862	0
80315	CPEB4	0.227479743309065	0
7461	CLIP2	0.227319360157248	0
2977	GUCY1A2	0.226765356451139	0
30837	SOCS7	0.22666938136986	0
10079	ATP9A	0.226346827438417	0
55964	SEPT3	0.226275910523122	0
11215	AKAP11	0.225764150590152	0
23326	USP22	0.225317879790574	0
80034	CSRNP3	0.225273106572805	0
22902	RUFY3	0.225216449425107	0
667	DST	0.225102732697349	1
57118	CAMK1D	0.225100042176181	0
64748	LPPR2	0.22492481414352	0
3800	KIF5C	0.224697005430833	0
5802	PTPRS	0.224681837209585	0
10645	CAMKK2	0.224658965159342	0
55684	RABL6	0.224398693735656	0
3423	IDS	0.224210783492084	0
80031	SEMA6D	0.224184315460073	0
51560	RAB6B	0.22391739658171	0
26040	SETBP1	0.223792403634698	0
642852	LOC642852	0.223761983019556	0
51466	EVL	0.223619368662767	0
2776	GNAQ	0.223479253590525	0
4897	NRCAM	0.223403106216637	0
27065	NSG1	0.223400851627598	0
1463	NCAN	0.223385032440268	0
2775	GNAO1	0.223375703163084	0
57282	SLC4A10	0.223360371743944	0
8193	DPF1	0.223092265482386	0
9229	DLGAP1	0.223048714997976	0
6326	SCN2A	0.223037864887399	3+
57611	ISLR2	0.223006580233991	0
9371	KIF3B	0.222933100324051	0
57482	KIAA1211	0.222799572468833	0
2823	GPM6A	0.222769148955908	0
4784	NFIX	0.222493656694232	0
6249	CLIP1	0.22243909515456	0
54715	RBFOX1	0.222412237014863	0
26472	PPP1R14B	0.222378844742812	0
1363	CPE	0.222250598663012	0
4298	MLLT1	0.222221840700155	0
10984	KCNQ1OT1	0.222040960020623	0
9118	INA	0.221902694760358	0
57680	CHD8	0.221799900342955	3+
1827	RCAN1	0.221341356718481	0
5911	RAP2A	0.221072843940122	0
6722	SRF	0.220708256847656	0
9612	NCOR2	0.220632684012906	0
5599	MAPK8	0.220487528201819	0
9859	CEP170	0.220470422127988	0
22983	MAST1	0.220468908942165	0
114793	FMNL2	0.220408349217901	0
150759	LINC00342	0.220344240869286	0
1272	CNTN1	0.220285921724395	0
22981	NINL	0.220151740238725	1
8925	HERC1	0.220129724409932	1
23171	GPD1L	0.220042211281428	0
84530	SRRM4	0.219976084350294	0
100846978	LINC00506	0.219785051846146	0
23085	ERC1	0.219676781613309	0
65268	WNK2	0.21938302415511	0
4297	KMT2A	0.21937090579601	3+
8476	CDC42BPA	0.219282708653433	0
57616	TSHZ3	0.21927099861957	0
9066	SYT7	0.219264218233679	0
9394	HS6ST1	0.219261739379142	0
23030	KDM4B	0.219228559825645	1
78999	LRFN4	0.219099669993199	0
10752	CHL1	0.219041311221016	0
901	CCNG2	0.218892884637714	0
79805	VASH2	0.218874211743494	0
55342	STRBP	0.21867482164868	0
22982	DIP2C	0.218457010953009	2
10949	HNRNPA0	0.218431521091078	0
8660	IRS2	0.218378951613156	0
22846	VASH1	0.21835519572255	0
283554	GPR137C	0.218313312798644	0
6252	RTN1	0.218231066932959	0
84937	ZNRF1	0.218142223111938	0
5567	PRKACB	0.217920396408064	0
1955	MEGF9	0.217876060080776	0
9079	LDB2	0.217807631848705	0
1212	CLTB	0.21779806598341	0
2898	GRIK2	0.217735557640701	0
23164	MPRIP	0.217716076582061	0
2033	EP300	0.217688650798876	1
23220	DTX4	0.217364109956713	0
10512	SEMA3C	0.217344844541023	0
23644	EDC4	0.217340914240695	0
157627	LINC00599	0.217311563693113	0
2802	GOLGA3	0.217293902773945	0
51412	ACTL6B	0.217042248962488	0
26122	EPC2	0.216957148462816	0
56252	YLPM1	0.216918567560097	0
10526	IPO8	0.216572595599986	0
192670	AGO4	0.216474058882008	0
375133	PI4KAP2	0.216445522999381	0
283450	HECTD4	0.216419857387435	3+
84446	BRSK1	0.216402512043147	1
219287	AMER2	0.216338593055145	0
1951	CELSR3	0.216302464389892	0
54858	PGPEP1	0.216208289330407	0
23542	MAPK8IP2	0.216180362757611	0
7067	THRA	0.216071185498698	0
10000	AKT3	0.215972846556131	0
6900	CNTN2	0.215728927789986	0
10472	ZBTB18	0.215686046151876	0
6092	ROBO2	0.215557371613686	0
1780	DYNC1I1	0.215391599939438	0
3983	ABLIM1	0.21529959276022	0
84467	FBN3	0.215240339020676	0
23135	KDM6B	0.214963324033757	3+
2051	EPHB6	0.214457551698856	0
55824	PAG1	0.214437313483231	0
5782	PTPN12	0.214336590129566	0
23405	DICER1	0.214333567562445	0
80335	WDR82	0.214214116013665	0
9757	KMT2B	0.21420560291029	0
57659	ZBTB4	0.214137045098758	0
25943	C20orf194	0.214124411607069	1
9804	TOMM20	0.214103019825983	0
28964	GIT1	0.214059454586773	0
23122	CLASP2	0.213975495275204	0
284361	EMC10	0.213881503646086	0
81553	FAM49A	0.213625034218493	0
4131	MAP1B	0.213416143369273	0
387509	GPR153	0.213382659186223	0
100506548	LOC100506548	0.213130659852393	0
23001	WDFY3	0.213012700663461	3+
57578	UNC79	0.21298707385659	1
164832	LONRF2	0.212924632342338	0
57338	JPH3	0.21275601610989	0
3842	TNPO1	0.212556171755288	0
23054	NCOA6	0.212433639083363	0
7324	UBE2E1	0.212347122780425	0
81855	SFXN3	0.212254765256059	0
618	BCYRN1	0.212221104131511	0
126731	CCSAP	0.212105471469707	0
3742	KCNA6	0.212082498751029	0
221981	THSD7A	0.212061356390625	1
4664	NAB1	0.212039330883639	0
84894	LINGO1	0.211993632910938	0
11189	CELF3	0.211842653208143	0
9781	RNF144A	0.211732338451062	0
27345	KCNMB4	0.211704792088076	0
7407	VARS	0.211687808293658	0
388	RHOB	0.211672450333786	0
116225	ZMYND19	0.211671983165582	0
8715	NOL4	0.211569219809825	0
22911	WDR47	0.211549849440226	0
8128	ST8SIA2	0.211531769419857	0
26470	SEZ6L2	0.211514212941189	0
83637	ZMIZ2	0.211481449792448	0
23413	NCS1	0.211359254650978	0
283683	LOC283683	0.211138281537986	0
8396	PIP4K2B	0.210991317414575	0
10228	STX6	0.210986682141673	0
11273	ATXN2L	0.210908021153294	0
57522	SRGAP1	0.210793011823664	0
85300	ATCAY	0.210496957653357	0
54928	IMPAD1	0.210377147995667	0
23136	EPB41L3	0.210365040228429	0
55219	TMEM57	0.210271553062163	0
5795	PTPRJ	0.210221000925125	0
9644	SH3PXD2A	0.2099793520076	0
23348	DOCK9	0.209874717108251	0
23241	PACS2	0.209842856339631	0
58508	KMT2C	0.209797939021699	3+
51105	PHF20L1	0.209786198297099	0
4774	NFIA	0.209705195631368	0
90668	LRRC16B	0.209631367583374	0
41	ASIC1	0.209550250655895	0
10527	IPO7	0.209402988390225	0
103	ADAR	0.209327362009346	0
51088	KLHL5	0.209303937832911	0
8704	B4GALT2	0.209226038161807	0
6457	SH3GL3	0.209073638087113	0
57690	TNRC6C	0.209047579696623	0
126868	MAB21L3	0.20883483320099	0
23150	FRMD4B	0.20881868731924	0
1400	CRMP1	0.208799819880633	0
10522	DEAF1	0.208706959337779	0
6894	TARBP1	0.208694446413064	0
57498	KIDINS220	0.208646043886336	0
155435	RBM33	0.20864308099258	0
23499	MACF1	0.208609385011318	0
7533	YWHAH	0.208601266710299	0
29767	TMOD2	0.20853296119147	0
144348	ZNF664	0.20850529583198	0
92312	MEX3A	0.208462941665818	0
9905	SGSM2	0.20845946272648	0
9448	MAP4K4	0.208452117148316	0
4644	MYO5A	0.208402120548795	0
54989	ZNF770	0.208342319193838	0
9024	BRSK2	0.208228085881562	1
643406	LOC643406	0.20821243363508	0
7392	USF2	0.208127802812739	0
1455	CSNK1G2	0.208022723738135	0
124930	ANKRD13B	0.208002427802675	0
27245	AHDC1	0.207937910413937	1
10724	MGEA5	0.207884552162464	0
222962	SLC29A4	0.20776327419085	0
6447	SCG5	0.207732483724735	0
56061	UBFD1	0.207658721547492	0
23053	ZSWIM8	0.207591642371914	0
51701	NLK	0.207582002072559	0
10501	SEMA6B	0.207419564036157	0
738	VPS51	0.20737405807619	0
23331	TTC28	0.207122800578595	0
352954	GATS	0.207089473174839	0
440270	GOLGA8B	0.207085509658954	0
5362	PLXNA2	0.207016274843809	0
6602	SMARCD1	0.206958051425078	0
1840	DTX1	0.206903603645283	0
23015	GOLGA8A	0.206883963281954	0
50863	NTM	0.20680732334516	0
55573	CDV3	0.206737137305785	0
140710	SOGA1	0.206531588391005	0
440	ASNS	0.206420759829224	0
6253	RTN2	0.20634746393878	0
79567	FAM65A	0.206112389512983	0
124923	SGK494	0.206080398770204	0
84440	RAB11FIP4	0.206031210813988	0
2334	AFF2	0.2059263224154	0
221092	HNRNPUL2	0.205835871116308	0
63974	NEUROD6	0.205789193441242	0
2892	GRIA3	0.205778842071091	0
23246	BOP1	0.205721918665899	0
3614	IMPDH1	0.205610108225181	0
1850	DUSP8	0.205596983492666	0
1113	CHGA	0.205542840300043	0
4904	YBX1	0.20553807142684	0
4133	MAP2	0.205501156688863	0
646113	LINC00643	0.205387966807	0
22852	ANKRD26	0.205370197969704	0
6497	SKI	0.20533128652522	1
9715	FAM131B	0.205306355284439	0
57631	LRCH2	0.205268712015486	0
9231	DLG5	0.205201200404198	0
9929	JOSD1	0.205121867397947	0
79827	CLMP	0.205083320167898	0
23207	PLEKHM2	0.205028146706408	0
83636	C19orf12	0.205005256853288	0
55558	PLXNA3	0.204938256797121	1
4978	OPCML	0.204880290619694	0
9475	ROCK2	0.204750399193643	0
55740	ENAH	0.204741226123185	0
644128	RPL23AP53	0.204658329467541	0
83641	FAM107B	0.204612424246346	0
26086	GPSM1	0.204590612233519	0
9811	CTIF	0.204481441449816	0
4301	MLLT4	0.204432668397825	0
56975	FAM20C	0.204404234175219	0
57144	PAK7	0.204303561944212	0
84502	JPH4	0.204257064658782	0
116966	WDR17	0.204134835337455	0
53635	PTOV1	0.204133556350952	0
9284	NPIPA1	0.204122044014754	0
1525	CXADR	0.204042976931938	0
100129434	LOC100129434	0.203937877586202	0
23524	SRRM2	0.203777092022499	1
79137	FAM134A	0.203683905045692	0
90060	CCDC120	0.203627092466051	0
4045	LSAMP	0.203594329421868	0
321	APBA2	0.2034868364122	0
2054	STX2	0.203468330198541	0
6595	SMARCA2	0.203422390758034	0
5566	PRKACA	0.203321183676534	0
101927560	LOC101927560	0.203274528895605	0
100506658	OCLN	0.203263847953096	0
51308	REEP2	0.203253343808974	0
27254	CSDC2	0.203252229981919	0
2011	MARK2	0.203236244541351	0
10507	SEMA4D	0.203151632268423	0
80725	SRCIN1	0.203148687513213	0
91694	LONRF1	0.203096818166169	0
80821	DDHD1	0.203035383258015	0
25851	TECPR1	0.202984826110764	0
53615	MBD3	0.202892297001764	0
27344	PCSK1N	0.202826404756311	0
11267	SNF8	0.20281839630277	0
79012	CAMKV	0.202807581658844	0
81566	CSRNP2	0.202789938894087	0
116987	AGAP1	0.20272815687955	0
387119	CEP85L	0.20271169481129	0
51278	IER5	0.202701580517325	0
9980	DOPEY2	0.202669939705086	0
55084	SOBP	0.202653783268897	0
57534	MIB1	0.202574709113098	0
9659	PDE4DIP	0.202451566936041	0
54926	UBE2R2	0.202446718845157	0
22887	FOXJ3	0.202422496326459	0
10755	GIPC1	0.202360239567556	0
23174	ZCCHC14	0.202317542706683	0
23466	CBX6	0.202236013380659	0
758	MPPED1	0.202207064443863	0
3300	DNAJB2	0.202202368453774	0
4249	MGAT5	0.202195744384855	0
6711	SPTBN1	0.202192787289496	1
171023	ASXL1	0.202183612262351	0
26059	ERC2	0.201986069184524	0
2572	GAD2	0.201880100046649	0
256643	CXorf23	0.201717410070867	0
221061	FAM171A1	0.20170357814391	0
4650	MYO9B	0.201688304543575	1
6664	SOX11	0.201637263217431	0
100309464	OTX2-AS1	0.201632980076818	0
1183	CLCN4	0.201555356942448	0
148252	DIRAS1	0.201533424459772	0
10447	FAM3C	0.20144281820738	0
57634	EP400	0.2014277993803	1
57540	PTCHD2	0.201371998651326	0
23648	SSBP3	0.201352178704038	0
114804	RNF157	0.201316207413146	0
23300	ATMIN	0.201254626881325	0
5585	PKN1	0.201242292421232	0
8621	CDK13	0.201187565044905	0
5521	PPP2R2B	0.201134514666995	0
23099	ZBTB43	0.201128118191552	0
57677	ZFP14	0.201107731325167	0
26994	RNF11	0.201106162413291	0
56970	ATXN7L3	0.201096284933904	0
55884	WSB2	0.201095461194683	0
5170	PDPK1	0.201081319266881	0
27339	PRPF19	0.200991240277425	0
56929	FEM1C	0.200984482891477	0
1059	CENPB	0.200947177428071	0
3653	IPW	0.200841756902929	0
4130	MAP1A	0.200822005713015	0
9863	MAGI2	0.200810983255776	0
23013	SPEN	0.200753491204516	2
78997	GDAP1L1	0.200734374793348	0
65009	NDRG4	0.200700689208742	0
347273	MURC	0.200653663670728	0
5310	PKD1	0.200622431130816	0
8470	SORBS2	0.200617791854924	0
23621	BACE1	0.200576527177785	0
375323	LHFPL4	0.200565690335923	0
9696	CROCC	0.200437327075469	0
130026	ICA1L	0.200393664400017	0
65055	REEP1	0.200356344072664	0
4139	MARK1	0.200351370239165	0
55512	SMPD3	0.200307282508386	0
29924	EPN1	0.200295177128646	0
27253	PCDH17	0.200198088919659	0
4082	MARCKS	0.200193028228877	0
112	ADCY6	0.200024850551536	0
23309	SIN3B	0.199994009261354	0
57666	FBRSL1	0.199943621029188	0
148014	TTC9B	0.199932036906254	0
9699	RIMS2	0.199902830863467	0
23608	MKRN1	0.199893491231533	0
254065	BRWD3	0.199876190966018	0
79685	SAP30L	0.199823083151309	0
2186	BPTF	0.199780863708005	0
51111	SUV420H1	0.199773624071172	3+
1917	EEF1A2	0.199738175053885	0
160518	DENND5B	0.199722889932038	0
23625	FAM89B	0.199708670109042	0
23384	SPECC1L	0.199610365963818	0
4035	LRP1	0.199600136452066	0
55056	FLJ10038	0.199587459964227	0
5529	PPP2R5E	0.199584563343948	0
139231	FAM199X	0.19950733092246	0
56897	WRNIP1	0.19944726337842	0
51439	FAM8A1	0.199436673354507	1
57551	TAOK1	0.199399877989218	0
29068	ZBTB44	0.199387150485787	0
55466	DNAJA4	0.19938139751843	0
22877	MLXIP	0.199311489946388	0
5287	PIK3C2B	0.199310230097452	0
64326	RFWD2	0.199308706813986	0
274	BIN1	0.199234221332714	0
647979	LINC00657	0.199207208035407	0
57553	MICAL3	0.199092631413922	0
10439	OLFM1	0.19906335628011	0
89853	MVB12B	0.199000235622326	0
100272216	LOC100272216	0.198964085567742	0
2935	GSPT1	0.198930505483001	0
7337	UBE3A	0.198930383020341	0
53339	BTBD1	0.198917566980379	0
6461	SHB	0.198906134656786	0
85453	TSPYL5	0.198863083564671	0
55738	ARFGAP1	0.198862989899733	0
5452	POU2F2	0.198842080465691	0
23429	RYBP	0.198796369077751	0
89795	NAV3	0.198795656499444	0
55160	ARHGEF10L	0.198789913370546	0
5136	PDE1A	0.19876674308336	0
57026	PDXP	0.198711462133747	0
84162	KIAA1109	0.198592543876549	0
64781	CERK	0.198571003725629	0
201595	STT3B	0.198559574459506	0
284001	CCDC57	0.19854268235129	0
64838	FNDC4	0.198491426330414	0
10919	EHMT2	0.1984872894521	0
114819	CROCCP3	0.198473006697797	0
8120	AP3B2	0.19845461073209	0
54776	PPP1R12C	0.198448253625552	0
975	CD81	0.198400955808797	0
156	ADRBK1	0.198392256265379	0
79027	ZNF655	0.198367761433391	0
2182	ACSL4	0.198324768470386	0
1859	DYRK1A	0.198294343920483	2
659	BMPR2	0.198220623708067	0
125058	TBC1D16	0.198159391675216	0
4026	LPP	0.19811956715476	0
26528	DAZAP1	0.198065031192036	0
8440	NCK2	0.198028022542718	0
9770	RASSF2	0.198014928690108	0
9263	STK17A	0.198004056142868	0
25920	NELFB	0.198002919479868	0
22876	INPP5F	0.197937031880622	0
5800	PTPRO	0.197783268200609	0
54540	FAM193B	0.197776377013206	0
5454	POU3F2	0.197750793782835	0
57584	ARHGAP21	0.197635827677295	0
51622	CCZ1	0.197629367063309	0
9637	FEZ2	0.197559233344573	0
1186	CLCN7	0.197542228840653	0
23036	ZNF292	0.197538789379193	1
7644	ZNF91	0.19748500285204	0
219771	CCNY	0.197444329442203	0
51696	HECA	0.197389204644071	0
57670	KIAA1549	0.197299350358502	0
23768	FLRT2	0.197288458476701	0
7582	ZNF33B	0.197226758388219	0
408	ARRB1	0.197140703398149	0
6655	SOS2	0.197118070515359	0
84954	MPND	0.197094580508188	0
4783	NFIL3	0.197044526276043	0
22985	ACIN1	0.19703287803109	0
8289	ARID1A	0.196969728180507	0
64207	IRF2BPL	0.196943501456563	1
146923	RUNDC1	0.196930741221736	1
161424	NOP9	0.196913332755927	0
84152	PPP1R1B	0.196861189291334	0
607	BCL9	0.19683861321444	0
54487	DGCR8	0.196829249340658	1
51310	SLC22A17	0.196812693473277	0
23023	TMCC1	0.196803244267641	0
267	AMFR	0.196791365781446	0
119	ADD2	0.196647268298275	0
23367	LARP1	0.196586320785671	0
154810	AMOTL1	0.196504269857671	1
253143	PRR14L	0.196403549566543	1
4037	LRP3	0.19636498328501	0
84449	ZNF333	0.196321553841531	0
80727	TTYH3	0.196299160098606	0
2580	GAK	0.19628996780655	0
66036	MTMR9	0.196285404265709	0
57728	WDR19	0.196100312179961	0
6452	SH3BP2	0.195983752320166	0
23139	MAST2	0.195963623385099	0
56965	PARP6	0.195938457769157	0
55914	ERBB2IP	0.195860326717269	1
373	TRIM23	0.195824831388671	0
54799	MBTD1	0.195795583830161	0
9889	ZBED4	0.195729596444868	0
10133	OPTN	0.195728387760819	0
56899	ANKS1B	0.195711599275264	0
54815	GATAD2A	0.195655870736937	0
83858	ATAD3B	0.195635028369549	0
23028	KDM1A	0.195615436403652	0
3840	KPNA4	0.195605549479717	0
2309	FOXO3	0.195518121590038	0
26152	ZNF337	0.195508717310079	0
90007	MIDN	0.195484232477929	0
55729	ATF7IP	0.195483701354803	0
84148	KAT8	0.195480695850445	0
25938	HEATR5A	0.195463909401034	0
57575	PCDH10	0.195435067293136	0
10521	DDX17	0.19537074630961	0
100129482	ZNF37BP	0.195365893409265	0
154661	RUNDC3B	0.195219808794913	1
2782	GNB1	0.195215147894588	0
5605	MAP2K2	0.195137826746667	0
9267	CYTH1	0.195101526466446	0
127703	C1orf216	0.195101330629613	0
79699	ZYG11B	0.195090085473289	0
7862	BRPF1	0.194914713251816	0
9919	SEC16A	0.194883732282108	0
1137	CHRNA4	0.194830541659746	0
23187	PHLDB1	0.194757419399006	0
54994	GID8	0.19472238438629	0
138046	RALYL	0.194711289291361	0
23041	MON2	0.194694704913288	0
340542	BEX5	0.194689775851087	0
80232	WDR26	0.194682940036388	0
84747	UNC119B	0.194669641331782	0
8924	HERC2	0.194659788509535	0
22924	MAPRE3	0.194641343329153	0
84687	PPP1R9B	0.194616502469103	0
79641	ROGDI	0.194616061199148	0
10391	CORO2B	0.194589089927754	1
2263	FGFR2	0.194455998762445	0
81790	RNF170	0.194445587215408	0
11083	DIDO1	0.194405074788382	0
10336	PCGF3	0.194343583630685	0
4675	NAP1L3	0.194343277802286	0
8927	BSN	0.194334837668792	0
8831	SYNGAP1	0.194332883369231	3+
1912	PHC2	0.194298438158567	0
345630	FBLL1	0.194268580867161	0
56889	TM9SF3	0.194251909097256	0
1108	CHD4	0.194165158311747	0
2783	GNB2	0.194152688408047	0
5865	RAB3B	0.194135998032282	0
816	CAMK2B	0.194089299068667	0
1428	CRYM	0.193963916445221	0
22864	R3HDM2	0.193918876012758	0
595135	PGM5P2	0.193870208296787	0
29106	SCG3	0.193806101278563	0
221496	LEMD2	0.193763234275928	0
7410	VAV2	0.193733470778485	0
54915	YTHDF1	0.193620240931174	0
146713	RBFOX3	0.19360342534885	0
51621	KLF13	0.193541231886903	0
56850	GRIPAP1	0.193526033373033	0
729348	LOC729348	0.19345467042384	0
55102	ATG2B	0.193448446033653	0
5906	RAP1A	0.193430920759194	0
57574	MARCH4	0.193429944478298	0
7003	TEAD1	0.193416910075576	0
9969	MED13	0.193383327507327	3+
157922	CAMSAP1	0.193358264779037	0
826	CAPNS1	0.193338634241672	0
23048	FNBP1	0.19332248971683	0
10147	SUGP2	0.19330225282348	0
23528	ZNF281	0.193276459531211	0
5613	PRKX	0.193255139842493	0
64083	GOLPH3	0.193108330693108	0
5138	PDE2A	0.193073541250395	0
284702	HNRNPU-AS1	0.193070623379226	0
6091	ROBO1	0.193059776443217	0
63925	ZNF335	0.193051518654252	0
375790	AGRN	0.193039315470678	0
23598	PATZ1	0.193036560401566	0
79939	SLC35E1	0.193022034709945	0
9479	MAPK8IP1	0.19302188924408	0
6508	SLC4A3	0.192973784196168	0
9772	KIAA0195	0.192861002578161	0
57532	NUFIP2	0.192846151631042	0
8658	TNKS	0.192807327868258	0
56896	DPYSL5	0.192704317532049	0
1038	CDR1	0.192694791569794	0
100131257	LOC100131257	0.192678223890849	0
22874	PLEKHA6	0.192619534776618	0
6881	TAF10	0.192555114872374	0
23400	ATP13A2	0.192349684802108	0
51112	TRAPPC12	0.192319865504049	0
57337	SENP7	0.192209891437652	0
127687	C1orf122	0.192203726090366	0
10898	CPSF4	0.192157377909815	0
51343	FZR1	0.19210604954563	0
7328	UBE2H	0.192081784687629	0
9989	PPP4R1	0.192081447603084	0
57649	PHF12	0.192003426957268	1
83638	C11orf68	0.191997724309822	0
10500	SEMA6C	0.191972331103956	0
27314	RAB30	0.191968460377511	0
1645	AKR1C1	0.191883817198683	0
6310	ATXN1	0.191873024062309	0
3092	HIP1	0.19181247014155	0
5578	PRKCA	0.191809706008251	0
57190	SEPN1	0.191713942917103	0
55275	VPS53	0.191686344406402	0
201292	TRIM65	0.191678607866378	0
2310	FOXO3B	0.191584072744375	0
116154	PHACTR3	0.191575331945735	0
5532	PPP3CB	0.19153443985914	0
4134	MAP4	0.191393751069736	0
128866	CHMP4B	0.191361807285657	0
9113	LATS1	0.191333759960124	0
56916	SMARCAD1	0.191307922597848	0
404217	CTXN1	0.191263870524629	0
22921	MSRB2	0.19121648537453	0
51320	MEX3C	0.191068796790786	0
57556	SEMA6A	0.19106558625868	1
4883	NPR3	0.190977129607233	0
4649	MYO9A	0.190966485897125	0
23523	CABIN1	0.190936872148867	0
5516	PPP2CB	0.190924321409235	0
64753	CCDC136	0.190881325707621	0
4781	NFIB	0.190686606272965	1
143282	FGFBP3	0.190668779531455	0
9543	IGDCC3	0.190651986927872	0
84620	ST6GAL2	0.190650658973986	0
23245	ASTN2	0.190617675154367	0
79832	QSER1	0.190602747488912	0
57586	SYT13	0.190598264086393	0
6723	SRM	0.190577962113172	0
127829	ARL8A	0.190563360899202	0
80700	UBXN6	0.190549478034474	0
79577	CDC73	0.190487172838495	1
10075	HUWE1	0.190472905040101	0
25830	SULT4A1	0.190354402003671	0
3738	KCNA3	0.190326333659902	0
6855	SYP	0.190318785993989	0
79587	CARS2	0.190305662379832	0
192683	SCAMP5	0.190281234056757	0
5253	PHF2	0.190182688876523	2
84668	FAM126A	0.190120109020576	0
51768	TM7SF3	0.190098049510151	0
284004	HEXDC	0.190055753464376	0
8567	MADD	0.190005811147579	0
7090	TLE3	0.189963179770528	0
10253	SPRY2	0.18994582316589	1
11180	WDR6	0.189944356391927	0
84247	LDOC1L	0.189939190331921	0
126298	IRGQ	0.189926017847405	0
23236	PLCB1	0.189923083346761	0
23097	CDK19	0.189877673931752	0
1612	DAPK1	0.189850137076361	0
27	ABL2	0.189832221473997	0
1740	DLG2	0.189717005609757	0
57472	CNOT6	0.18968136052862	0
84557	MAP1LC3A	0.189612225865855	0
25827	FBXL2	0.189514326869173	0
2975	GTF3C1	0.189475946727004	0
150864	FAM117B	0.189442200407608	0
23043	TNIK	0.189441372202705	0
57655	GRAMD1A	0.189384975798057	0
23254	KAZN	0.189350457277084	0
79364	ZXDC	0.189340598527111	0
23399	CTDNEP1	0.189318748164033	0
55593	OTUD5	0.189257255869918	0
54629	FAM63B	0.189195821932669	0
133686	NADK2	0.189163133066841	0
170954	PPP1R18	0.189150742348821	0
4800	NFYA	0.189147636935406	0
57645	POGK	0.189038956129482	0
9563	H6PD	0.189008041329674	0
81831	NETO2	0.188990329195835	0
605	BCL7A	0.188913495550362	0
26173	INTS1	0.188903842757413	1
8301	PICALM	0.188885526270994	0
23394	ADNP	0.188848258597207	3+
57798	GATAD1	0.188847528662098	0
6622	SNCA	0.188823825747116	0
57492	ARID1B	0.188794646321901	3+
9755	TBKBP1	0.188775795514634	0
25817	FAM19A5	0.188771441094442	0
6721	SREBF2	0.188738072863393	0
259282	BOD1L1	0.188703884604729	0
4140	MARK3	0.188668394096037	0
6654	SOS1	0.188513642195429	0
55112	WDR60	0.188458222312492	0
4661	MYT1	0.188426584817664	0
401207	C5orf63	0.188417264875485	0
23592	LEMD3	0.188416117632233	0
80228	ORAI2	0.188395936031525	0
56172	ANKH	0.188349147024888	0
353511	PKD1P6	0.188340414104787	0
8312	AXIN1	0.188274794839417	0
9891	NUAK1	0.188212622368013	0
54873	PALMD	0.188206173821473	0
23032	USP33	0.188173260242652	0
56894	AGPAT3	0.18817302186093	0
2746	GLUD1	0.188163861288656	0
3631	INPP4A	0.188142904243862	0
23467	NPTXR	0.188141103569976	0
5887	RAD23B	0.188137142924858	0
114798	SLITRK1	0.188108578498678	0
2241	FER	0.188107950377948	0
92181	UBTD2	0.18809373976465	0
7077	TIMP2	0.187960846736702	0
23162	MAPK8IP3	0.187918323342827	0
27439	CECR6	0.187874872880297	0
55690	PACS1	0.187866328468767	0
2820	GPD2	0.187850706920853	0
23476	BRD4	0.187836206445313	0
90139	TSPAN18	0.187778214060339	0
22853	LMTK2	0.187713154784543	0
55852	TEX2	0.187709644204534	0
5502	PPP1R1A	0.187684091601807	0
9887	SMG7	0.187660710138451	0
9832	JAKMIP2	0.187612132289126	0
23505	TMEM131	0.187532331689132	1
54328	GPR173	0.187503540746027	0
7552	ZNF711	0.187493183251768	0
222865	TMEM130	0.18747913361162	0
81037	CLPTM1L	0.187474118923973	0
83642	SELO	0.187439760404537	0
6812	STXBP1	0.187425796121964	1
54985	HCFC1R1	0.187374851702874	0
5922	RASA2	0.187372448968555	0
57711	ZNF529	0.18733060687439	0
79971	WLS	0.187308457832659	0
1291	COL6A1	0.18728643774031	0
55832	CAND1	0.187240029972515	0
163404	LPPR5	0.187231702464122	0
774	CACNA1B	0.18721746924757	0
11214	AKAP13	0.187205535834989	0
7057	THBS1	0.187199632010405	0
320	APBA1	0.187190185354759	0
283149	BCL9L	0.187152031602249	0
57446	NDRG3	0.187090494935102	0
54993	ZSCAN2	0.187036404748814	0
10444	ZER1	0.187034165063555	0
57209	ZNF248	0.186982270744232	0
9170	LPAR2	0.186980266326475	0
3485	IGFBP2	0.186971515657716	0
7916	PRRC2A	0.186958786538818	0
5900	RALGDS	0.186934791518331	0
11176	BAZ2A	0.186918728755371	0
26057	ANKRD17	0.186895629140527	0
65125	WNK1	0.186884903030826	0
23299	BICD2	0.186845765581112	0
26108	PYGO1	0.186839871613156	0
10186	LHFP	0.186835620299666	0
283638	CEP170B	0.186823261547762	0
390927	ZNF793	0.186778405645077	0
64771	C6orf106	0.186688752789461	0
55294	FBXW7	0.186683699459686	0
221710	SMIM13	0.186663241429611	0
10486	CAP2	0.186654520657154	0
2774	GNAL	0.186600938039697	0
5455	POU3F3	0.186507814525943	0
55000	TUG1	0.186497129959109	0
220972	MARCH8	0.186473933850437	0
140467	ZNF358	0.186451148150441	0
25792	CIZ1	0.186445137853688	0
375704	ENHO	0.186436297660116	0
79085	SLC25A23	0.186435937661711	0
54832	VPS13C	0.186421122988311	0
2817	GPC1	0.186415419114192	0
4302	MLLT6	0.186411259321002	0
2889	RAPGEF1	0.186387384079691	0
6604	SMARCD3	0.186313528995464	0
51199	NIN	0.186291019783321	1
23774	BRD1	0.186227079127444	0
53353	LRP1B	0.186182737637244	0
23025	UNC13A	0.186153699514974	0
9145	SYNGR1	0.186144548484245	0
339983	NAT8L	0.18613858417514	0
57727	NCOA5	0.186039379469287	0
29799	YPEL1	0.18602913115462	0
613	BCR	0.185963987464237	0
152006	RNF38	0.185931447501848	1
4494	MT1F	0.185912308149805	0
100506990	LOC100506990	0.185838725281907	0
254048	UBN2	0.185822495388826	2
10717	AP4B1	0.185711950820543	0
79726	WDR59	0.185690721163801	0
84289	ING5	0.185681853331278	0
2744	GLS	0.185678650354032	0
54958	TMEM160	0.18563935308062	0
9915	ARNT2	0.185573721727486	0
56776	FMN2	0.185542214419059	0
129285	PPP1R21	0.18553618339661	0
114787	GPRIN1	0.185530549129124	1
58489	ABHD17C	0.185463001460839	0
1993	ELAVL2	0.185437076113662	1
284443	ZNF493	0.185399551322614	0
5524	PPP2R4	0.185396945445504	0
3801	KIFC3	0.18539184184943	0
23586	DDX58	0.185382058168754	0
80267	EDEM3	0.185375758449645	1
889	KRIT1	0.185351855904621	0
10381	TUBB3	0.185326353007834	0
128637	TBC1D20	0.185295353400302	0
116113	FOXP4	0.185278992998495	0
155061	ZNF746	0.185265271423015	0
166	AES	0.185198403595619	0
10999	SLC27A4	0.185182552823999	0
83692	CD99L2	0.185175697034188	0
57580	PREX1	0.185147786233569	0
57701	NCKAP5L	0.18511909661709	0
8165	AKAP1	0.185059048996405	0
112936	VPS26B	0.185058967691104	0
84553	FAXC	0.185049405613734	0
5495	PPM1B	0.185002033294438	0
5530	PPP3CA	0.184960681419832	0
9117	SEC22C	0.184924640599997	0
122060	SLAIN1	0.184915752745838	0
9640	ZNF592	0.184886090354128	0
84898	PLXDC2	0.184878910066601	0
256987	SERINC5	0.184869083460541	0
953	ENTPD1	0.184860656456792	0
51351	ZNF117	0.184822650204693	0
84501	SPIRE2	0.18478938179758	0
5563	PRKAA2	0.184762148722308	0
415116	PIM3	0.184757406218248	0
54681	P4HTM	0.184654247245003	0
10787	NCKAP1	0.184618487484899	0
4062	LY6H	0.184551270361061	0
23313	KIAA0930	0.184531898860136	0
6482	ST3GAL1	0.184529552357367	0
7559	ZNF12	0.184500558232111	0
23329	TBC1D30	0.1844959573282	0
220906	WAC-AS1	0.184491359890413	0
10531	PITRM1	0.184490938026457	0
23002	DAAM1	0.18446353382378	0
118	ADD1	0.184451805750769	0
54454	ATAD2B	0.184436237179879	0
84256	FLYWCH1	0.18440515150581	0
3480	IGF1R	0.184387322831385	0
6416	MAP2K4	0.184361205481019	0
753	LDLRAD4	0.184358654341146	0
9737	GPRASP1	0.184353637340855	0
23082	PPRC1	0.184343480430066	0
28232	SLCO3A1	0.184342020746128	0
246175	CNOT6L	0.184302148744733	0
84461	NEURL4	0.184285291166478	0
55114	ARHGAP17	0.184271236715094	0
28996	HIPK2	0.184088226723417	0
23431	AP4E1	0.184047147269209	1
60312	AFAP1	0.184015322795606	0
23080	AVL9	0.183942060263571	0
54756	IL17RD	0.183911218221342	0
23243	ANKRD28	0.183875354568707	0
64780	MICAL1	0.18387191675174	0
4915	NTRK2	0.183857934456381	0
55625	ZDHHC7	0.183847471674389	0
25759	SHC2	0.183827842914067	0
100113407	TMEM170B	0.18378172225124	0
9703	KIAA0100	0.183700085902668	1
2059	EPS8	0.183684220753859	0
7732	RNF112	0.183664472496492	0
1002	CDH4	0.183486839464418	0
79794	C12orf49	0.183486617175573	0
9037	SEMA5A	0.183443058165494	0
25769	SLC24A2	0.18343519818328	0
92597	MOB1B	0.18340582803109	0
121665	SPPL3	0.183402597139557	0
57662	CAMSAP3	0.183394748825654	0
23095	KIF1B	0.183391942186981	0
2039	DMTN	0.183387081202457	0
4248	MGAT3	0.183384183244554	0
221908	PPP1R35	0.183215399891929	0
200424	TET3	0.183180773974333	0
83999	KREMEN1	0.183146651291047	1
84867	PTPN5	0.183102387037302	0
3782	KCNN3	0.183101310872354	0
4300	MLLT3	0.183044188115586	0
340371	NRBP2	0.182904657467497	0
23201	FAM168A	0.182808246356145	0
9926	LPGAT1	0.182753978628419	0
84516	DCTN5	0.182746412876803	0
400073	C12orf76	0.182740434179	0
3728	JUP	0.182682040343279	1
9783	RIMS3	0.182675459889232	0
158358	KIAA2026	0.182658546559501	0
6872	TAF1	0.182603240761243	0
55643	BTBD2	0.182536304734197	0
1386	ATF2	0.182511363623314	0
51306	FAM13B	0.182429523993379	0
80139	ZNF703	0.182362878655049	0
60412	EXOC4	0.182283620550558	0
54726	OTUD4	0.182268510811044	0
26999	CYFIP2	0.18220118183993	0
10869	USP19	0.182200169664695	0
54965	PIGX	0.182180178362036	0
653121	ZBTB8A	0.182075006714563	0
23067	SETD1B	0.181949262218253	0
9256	BZRAP1	0.181940302256351	1
10060	ABCC9	0.18191954956787	0
23314	SATB2	0.181846851930068	0
27032	ATP2C1	0.181807421505174	0
23060	ZNF609	0.181715909329403	0
11338	U2AF2	0.181698469934349	0
339287	MSL1	0.181680232866247	0
120	ADD3	0.181660640388298	0
221935	SDK1	0.181655421446064	0
2332	FMR1	0.181650494587846	0
79018	GID4	0.181635468794454	0
4763	NF1	0.1816241859713	1
339290	LINC00667	0.181616665516396	0
116986	AGAP2	0.181610666120707	0
157	ADRBK2	0.181582654625639	0
84900	RNFT2	0.181541437443976	0
1949	EFNB3	0.181515293264785	0
1032	CDKN2D	0.181507048598187	0
23291	FBXW11	0.181401164233363	1
170506	DHX36	0.181341708200323	0
9578	CDC42BPB	0.181323164493598	1
440730	TRIM67	0.181293389524803	0
25854	FAM149A	0.181281286691424	0
117	ADCYAP1R1	0.181270548841987	0
1496	CTNNA2	0.181265101547813	0
342357	ZKSCAN2	0.181190233612748	0
51719	CAB39	0.181186060080996	0
9966	TNFSF15	0.181160990946388	0
54862	CC2D1A	0.181063917059229	1
100131017	ZNF316	0.181055726933033	0
100507421	TMEM178B	0.1810510677418	0
22998	LIMCH1	0.181029495315673	0
1785	DNM2	0.181029116659917	0
54704	PDP1	0.181018195133874	0
1846	DUSP4	0.180963520372572	0
23186	RCOR1	0.180961174809191	0
90362	FAM110B	0.180949392425357	0
23051	ZHX3	0.180935082930287	0
56126	PCDHB10	0.180809572940094	0
7587	ZNF37A	0.180748358145894	0
8314	BAP1	0.180718038990164	0
6949	TCOF1	0.180710111764552	0
440465	BAIAP2-AS1	0.180692147508411	0
114879	OSBPL5	0.180687825308044	0
11188	NISCH	0.180668633679773	0
23091	ZC3H13	0.180653747426123	0
29118	DDX25	0.180651055457151	0
10142	AKAP9	0.180628273465298	1
8507	ENC1	0.180592359814581	0
23373	CRTC1	0.180561655677243	0
26000	TBC1D10B	0.180529361171615	0
5150	PDE7A	0.180505269503836	0
4916	NTRK3	0.180497287246692	0
6773	STAT2	0.180466903751286	0
50804	MYEF2	0.180451445428372	0
2890	GRIA1	0.180421686930478	0
27242	TNFRSF21	0.180379815703691	0
58476	TP53INP2	0.180369581537713	0
54813	KLHL28	0.180353242333382	0
121512	FGD4	0.180343752415205	1
22990	PCNX	0.180334255436612	0
59274	MESDC1	0.180319020423219	0
55958	KLHL9	0.180315651667246	0
351	APP	0.180263671616673	0
402483	LINC01000	0.180222166194624	0
131601	TPRA1	0.180184268139741	0
30811	HUNK	0.180161203740754	0
472	ATM	0.18014665776362	0
1857	DVL3	0.180136761378238	1
9639	ARHGEF10	0.179931144451116	0
29072	SETD2	0.179892806400692	1
8672	EIF4G3	0.179881266333856	0
286495	TTC3P1	0.179875806622744	0
101928936	LOC101928936	0.179812967067896	0
51678	MPP6	0.179777924020181	0
57639	CCDC146	0.179771081647175	0
9788	MTSS1	0.179664559579749	0
7468	WHSC1	0.179628586421084	1
7025	NR2F1	0.179619351052129	0
388524	RPSAP58	0.17959373167678	0
727957	MROH1	0.179559472537899	0
80824	DUSP16	0.179540661029742	0
1981	EIF4G1	0.179525568464458	0
80319	CXXC4	0.179521436811499	0
7014	TERF2	0.179494488699788	0
25777	SUN2	0.179479571831361	0
283652	SLC24A5	0.179469172917152	0
57448	BIRC6	0.179428036705047	1
146909	KIF18B	0.179424379114635	0
57476	GRAMD1B	0.179412121543544	0
4779	NFE2L1	0.179407542014556	0
377	ARF3	0.179385115119525	0
56034	PDGFC	0.179373074756166	0
6439	SFTPB	0.179361830813419	0
29123	ANKRD11	0.179357487655621	3+
64855	FAM129B	0.179353877287787	0
10905	MAN1A2	0.179284465479497	0
347733	TUBB2B	0.179268498063565	0
79575	ABHD8	0.179244313508477	0
29911	HOOK2	0.179205890750578	0
54790	TET2	0.179123202917904	0
59269	HIVEP3	0.179075481044105	3+
11178	LZTS1	0.179002955911098	0
57488	ESYT2	0.17898688099204	0
149175	MANEAL	0.178986192363993	0
54800	KLHL24	0.178958767630113	0
7804	LRP8	0.178934805107515	0
9943	OXSR1	0.178930173723903	0
196500	PIANP	0.178831592944185	0
90525	SHF	0.178817227331571	0
646851	FAM227A	0.178816842995002	0
10188	TNK2	0.178811709211928	0
11011	TLK2	0.178800953671441	1
9194	SLC16A7	0.178768136754004	0
1795	DOCK3	0.178755853154463	0
394	ARHGAP5	0.178676879400114	1
4238	MFAP3	0.178675169181856	0
653319	KIAA0895L	0.178669713953181	0
4150	MAZ	0.178663713794893	0
57707	TLDC1	0.178658540923342	1
2742	GLRA2	0.178649825943921	0
27043	PELP1	0.178564877744771	0
253461	ZBTB38	0.178430714230448	0
151613	TTC14	0.178415867864687	0
9265	CYTH3	0.178372354827749	0
91584	PLXNA4	0.178347967454169	0
324	APC	0.17834654388665	0
5868	RAB5A	0.178251624771936	0
23380	SRGAP2	0.178202856114509	1
5335	PLCG1	0.178200899509585	0
8541	PPFIA3	0.178142558453295	0
93622	LOC93622	0.178140908709211	0
3667	IRS1	0.178139250564159	0
57669	EPB41L5	0.178080703238768	0
79047	KCTD15	0.178071820912922	0
55352	COPRS	0.177914886668189	0
51280	GOLM1	0.177913516734061	0
7915	ALDH5A1	0.177893176647218	0
57596	BEGAIN	0.177892163906386	0
283417	DPY19L2	0.177828807521668	0
57178	ZMIZ1	0.177825871793289	0
3911	LAMA5	0.177789199155086	0
50807	ASAP1	0.177786012055896	0
23118	TAB2	0.177765906879369	0
53616	ADAM22	0.177741309119795	0
55763	EXOC1	0.177739982833405	0
81894	SLC25A28	0.177696016269345	0
5921	RASA1	0.177675759041189	0
3643	INSR	0.177598828661976	0
65982	ZSCAN18	0.177596827648585	0
8408	ULK1	0.177587483087721	0
2281	FKBP1B	0.177569906007111	0
157638	FAM84B	0.177563444049951	0
54413	NLGN3	0.177550694669664	0
134111	UBE2QL1	0.177534727062248	0
64118	DUS1L	0.177519211576478	1
8573	CASK	0.177496811705676	0
5094	PCBP2	0.177482888168712	0
26268	FBXO9	0.177473654910465	0
9472	AKAP6	0.17745179018196	0
56900	TMEM167B	0.177413294627645	0
54583	EGLN1	0.177409207456468	0
6801	STRN	0.177400114185376	0
4782	NFIC	0.177327996634469	0
23259	DDHD2	0.177317353379622	0
55251	PCMTD2	0.177199898874542	0
7086	TKT	0.177138814142941	0
440300	LOC440300	0.177110625407123	0
10788	IQGAP2	0.177082347344807	1
23507	LRRC8B	0.177081832887082	0
23039	XPO7	0.177071296883279	0
57459	GATAD2B	0.177071068704734	0
9583	ENTPD4	0.177025291661571	0
11108	PRDM4	0.177019561873141	0
7342	UBP1	0.17699628098599	0
1398	CRK	0.176995776362466	0
55731	FAM222B	0.176978538058776	0
5584	PRKCI	0.176967041204852	0
55668	GPATCH2L	0.176966427015167	0
65250	C5orf42	0.176917823672504	0
3488	IGFBP5	0.176826448251601	0
57526	PCDH19	0.176798600504462	0
63976	PRDM16	0.176770121159698	0
29997	GLTSCR2	0.176755928547569	1
9922	IQSEC1	0.176751606964828	0
6942	TCF20	0.176743650778405	1
2257	FGF12	0.176738761072241	0
10565	ARFGEF1	0.176712970370825	0
80028	FBXL18	0.176707598984011	0
23214	XPO6	0.176699799322221	0
10814	CPLX2	0.176689380935894	0
81794	ADAMTS10	0.176660287631488	0
392	ARHGAP1	0.176634339745699	0
23228	PLCL2	0.176623641245181	0
140612	ZFP28	0.176593801837987	0
7178	TPT1	0.176592898982904	1
6456	SH3GL2	0.176506878575041	0
101926898	LOC101926898	0.176501806834433	0
91252	SLC39A13	0.176487126947745	0
57343	ZNF304	0.17647123767565	0
9829	DNAJC6	0.176442016393242	0
8718	TNFRSF25	0.176356230084433	0
26011	TENM4	0.176346560345006	0
3831	KLC1	0.176333790266421	1
10087	COL4A3BP	0.176332746400184	0
25782	RAB3GAP2	0.176330878702262	0
8824	CES2	0.176326643413085	0
91369	ANKRD40	0.176324212982197	0
331	XIAP	0.176289950850792	0
154215	NKAIN2	0.176278885138063	0
64403	CDH24	0.176271560120079	0
56478	EIF4ENIF1	0.17623209079118	0
26262	TSPAN17	0.176223807748863	0
284232	ANKRD20A9P	0.1761712341336	0
9057	SLC7A6	0.176149965915212	0
92305	TMEM129	0.176100592562359	0
2194	FASN	0.176084718529769	0
84444	DOT1L	0.17607077997223	1
2778	GNAS	0.176064690393731	0
221687	RNF182	0.176057728662524	0
25962	KIAA1429	0.176051339475187	0
10290	SPEG	0.176035197198012	0
93145	OLFM2	0.176030458990307	0
728392	LOC728392	0.176019798032102	0
286101	ZNF252P	0.17600454628231	0
219749	ZNF25	0.175978040722192	0
6620	SNCB	0.175952790475415	0
3776	KCNK2	0.175941580335599	0
51380	CSAD	0.17593677551985	0
54765	TRIM44	0.175928243603596	0
284058	KANSL1	0.175910279135745	0
3927	LASP1	0.175865822539345	0
57465	TBC1D24	0.175853867798056	0
4685	NCAM2	0.175838105676856	0
25822	DNAJB5	0.175827464176612	0
7204	TRIO	0.17578067109681	1
27092	CACNG4	0.175778187439776	0
63941	NECAB3	0.175775303288486	0
116150	NUS1	0.175766784868829	0
51366	UBR5	0.175749301757269	1
8545	CGGBP1	0.175732214554632	0
100996295	DNAH17-AS1	0.175723910426667	0
27443	CECR2	0.175693808281447	1
23148	NACAD	0.175692602766068	0
2982	GUCY1A3	0.175602470903937	0
23710	GABARAPL1	0.17560100102101	0
27125	AFF4	0.175588151153136	0
65979	PHACTR4	0.175584201179546	0
266971	PIPSL	0.175573490024298	0
3398	ID2	0.175495493047682	0
144404	TMEM120B	0.175485885052557	0
10810	WASF3	0.175476503702198	0
2534	FYN	0.17547486027375	0
63894	VIPAS39	0.175460852874851	0
7709	ZBTB17	0.175451127936259	0
63939	FAM217B	0.175427842492075	0
54972	TMEM132A	0.175417917709775	0
51132	RLIM	0.175392852683951	0
256714	MAP7D2	0.17537117522209	0
65264	UBE2Z	0.175317655171739	0
24147	FJX1	0.175246554253988	0
79989	TTC26	0.175229065528558	0
23312	DMXL2	0.175218560998333	0
4524	MTHFR	0.175217395969626	0
283991	UBALD2	0.175209249492155	0
10749	KIF1C	0.175207928605485	0
8916	HERC3	0.17519272880359	0
11057	ABHD2	0.175189567528142	0
5903	RANBP2	0.175189560461274	1
5152	PDE9A	0.175178933895725	0
8997	KALRN	0.175173906889781	0
58525	WIZ	0.175166859153228	0
10687	PNMA2	0.175155743261328	0
54899	PXK	0.175155395456649	0
168455	CCDC71L	0.175124933572062	0
4898	NRD1	0.17512084241965	0
57515	SERINC1	0.175116515925	0
1487	CTBP1	0.175116451657267	0
91851	CHRDL1	0.175090434218948	0
54434	SSH1	0.175005188993236	0
10081	PDCD7	0.174997722544463	0
9847	C2CD5	0.174902436779649	0
549	AUH	0.174900211670004	0
126129	CPT1C	0.174853854994207	0
8888	MCM3AP	0.174843346717365	0
9486	CHST10	0.174819679366399	0
10665	C6orf10	0.174757776388975	0
79848	CSPP1	0.174750143893207	0
5087	PBX1	0.17473769780298	1
91304	TMEM259	0.174700419215201	0
57489	ODF2L	0.174671628156506	0
54841	BIVM	0.17464576559249	0
85301	COL27A1	0.174597987083655	0
1114	CHGB	0.174583664975962	0
7122	CLDN5	0.174579651288755	0
56623	INPP5E	0.174505358769351	0
253782	CERS6	0.174492664628775	0
8073	PTP4A2	0.17448554501364	0
5296	PIK3R2	0.174477719131617	0
64093	SMOC1	0.174420134283377	0
79947	DHDDS	0.174377082318919	0
200576	PIKFYVE	0.174374988279125	0
135114	HINT3	0.174371241325095	0
92558	CCDC64	0.174369486273328	0
5569	PKIA	0.174367073642068	0
23446	SLC44A1	0.174366415134272	0
10013	HDAC6	0.174354898520973	0
25836	NIPBL	0.174324360931608	0
22828	SCAF8	0.174239864263227	0
57563	KLHL8	0.17422844261636	0
254170	FBXO33	0.174222428727338	0
6506	SLC1A2	0.174207326477733	0
3654	IRAK1	0.174176440448749	0
51317	PHF21A	0.174162816445349	1
4335	MNT	0.174103041473232	0
6829	SUPT5H	0.174101165614854	0
56654	NPDC1	0.174092771711693	0
286262	TPRN	0.174067205570989	0
128387	TATDN3	0.174032226801082	0
11166	SOX21	0.174002386155618	0
104	ADARB1	0.173987437846738	0
222256	CDHR3	0.173953625507985	0
9890	LPPR4	0.173946457636309	0
387763	C11orf96	0.173928451978972	0
9600	PITPNM1	0.173910339861225	0
157695	TDRP	0.173908191302333	0
27292	DIMT1	0.173879227671927	0
10672	GNA13	0.173834696439802	0
29801	ZDHHC8	0.173825739736022	0
51667	NUB1	0.173804150346313	0
55565	ZNF821	0.173769409410196	0
90120	C9orf69	0.173725025817617	0
54497	HEATR5B	0.173714762061512	1
6352	CCL5	0.173703185120449	0
130074	FAM168B	0.173694067843022	1
94103	ORMDL3	0.173668961143923	0
23286	WWC1	0.173651748199819	0
92906	HNRNPLL	0.173623185985619	0
57688	ZSWIM6	0.173602450262678	0
5501	PPP1CC	0.173584044292109	0
25829	TMEM184B	0.173525915993115	0
9672	SDC3	0.173520388964457	0
85369	STRIP1	0.173505843955538	1
9828	ARHGEF17	0.173487382221638	0
83639	TEX101	0.173448084592788	0
23294	ANKS1A	0.173423644443533	0
3642	INSM1	0.173410753451071	0
823	CAPN1	0.173339459652742	0
142678	MIB2	0.173320877002341	0
9821	RB1CC1	0.17330064175316	0
100288152	LOC100288152	0.173293082272004	0
23196	FAM120A	0.17327479782711	0
414918	DENND6B	0.173267878434884	0
23098	SARM1	0.173238510638402	0
113157	RPLP0P2	0.173220031519379	0
5257	PHKB	0.173206074739508	0
400954	EML6	0.173202389010368	0
4929	NR4A2	0.17319750164104	0
10498	CARM1	0.173180812761054	0
80209	PROSER1	0.173153249379054	0
81544	GDPD5	0.173069239697288	0
2002	ELK1	0.173068089368608	0
6198	RPS6KB1	0.173048110264218	0
6093	ROCK1	0.173017535388717	0
9143	SYNGR3	0.172940429294081	0
375341	C3orf62	0.172899817139115	0
166336	PRICKLE2	0.172880350210361	0
140700	SAMD10	0.172879193881392	0
29102	DROSHA	0.172834916253092	0
4205	MEF2A	0.172831925755019	0
55362	TMEM63B	0.172824253669581	0
8731	RNMT	0.172796906197884	0
55727	BTBD7	0.172791596178927	0
9530	BAG4	0.172787530339219	0
26575	RGS17	0.172766768057179	0
222183	SRRM3	0.172761420550223	0
84188	FAR1	0.172735668458256	0
114825	PWWP2A	0.172691563571388	0
7428	VHL	0.172678582911686	0
9868	TOMM70A	0.172601054888774	0
51166	AADAT	0.172600145513855	0
1874	E2F4	0.172594734413783	0
285382	C3orf70	0.172535539685427	0
3705	ITPK1	0.17251444937844	0
54675	CRLS1	0.172503678908959	0
8030	CCDC6	0.172428470256163	0
9520	NPEPPS	0.172424457161616	0
8417	STX7	0.172314372386817	0
283248	RCOR2	0.172301848299542	0
50515	CHST11	0.172300167324607	0
57554	LRRC7	0.172282591910837	0
100506930	LINC00665	0.172281085066876	0
9522	SCAMP1	0.172249809632366	0
54778	RNF111	0.172249638619301	0
100101267	POM121C	0.172213583731623	0
84249	PSD2	0.172190211862023	0
55689	YEATS2	0.172174532506588	0
51299	NRN1	0.172121151964904	0
9711	KIAA0226	0.172050057545696	0
9883	POM121	0.172042573619309	0
56919	DHX33	0.172013313873128	0
9900	SV2A	0.171850946082127	0
57583	TMEM181	0.171831040521484	0
23264	ZC3H7B	0.17176305429597	0
89797	NAV2	0.171760303811355	0
400720	ZNF772	0.171701518745321	0
338739	CSTF3-AS1	0.171630122881257	0
23390	ZDHHC17	0.171627750690936	0
9462	RASAL2	0.171609094543097	0
79888	LPCAT1	0.171597185729925	0
9683	N4BP1	0.17158197272039	0
54874	FNBP1L	0.171563625387906	0
23396	PIP5K1C	0.171547078905447	0
374875	HSD11B1L	0.171536323331374	0
84823	LMNB2	0.171520277932765	0
64375	IKZF4	0.171503984116673	0
6334	SCN8A	0.171495445316317	0
91272	BOD1	0.171494679351065	0
646762	LOC646762	0.171484056669921	0
5649	RELN	0.171468948743816	1
5797	PTPRM	0.171458715770243	0
55066	PDPR	0.171431181989839	0
432	ASGR1	0.1714199952661	0
84196	USP48	0.171399708713778	0
523	ATP6V1A	0.17137999885638	0
9852	EPM2AIP1	0.171328800712401	0
114882	OSBPL8	0.171326333085202	1
23327	NEDD4L	0.171268311133887	0
23365	ARHGEF12	0.171248574258261	0
80816	ASXL3	0.171220387966253	3+
5137	PDE1C	0.171193772468513	0
5891	MOK	0.171179192597426	0
81551	STMN4	0.171126776358272	1
8780	RIOK3	0.171062773777997	0
129642	MBOAT2	0.170995709212366	0
56257	MEPCE	0.170923709333949	0
23130	ATG2A	0.170869623467444	0
161742	SPRED1	0.170855254501366	0
26039	SS18L1	0.170847843058039	0
207	AKT1	0.170836192525709	0
54662	TBC1D13	0.170724283013051	0
138311	FAM69B	0.170722648531858	0
256281	NUDT14	0.170714671532235	0
58487	CREBZF	0.170660653239024	0
57787	MARK4	0.170648704515025	0
7503	XIST	0.170622155871864	0
9785	DHX38	0.170567061292817	0
23623	RUSC1	0.170524184048674	0
9923	ZBTB40	0.17052414705975	0
9112	MTA1	0.170503171313729	0
150465	TTL	0.170427957975741	0
11132	CAPN10	0.170425310562807	0
9517	SPTLC2	0.170405326091143	0
490	ATP2B1	0.170401656512426	0
8945	BTRC	0.170384544505341	1
57648	KIAA1522	0.170294756343393	0
51780	KDM3B	0.170284404562334	0
1915	EEF1A1	0.170272486227018	0
8642	DCHS1	0.170227100139712	0
57215	THAP11	0.170214750352157	0
317781	DDX51	0.170169853406393	0
10580	SORBS1	0.170154566900272	1
100190986	LOC100190986	0.170151021450975	0
2734	GLG1	0.170147600214684	0
134829	CLVS2	0.170114282457275	0
102	ADAM10	0.170099626868526	0
54206	ERRFI1	0.170056129395859	0
11076	TPPP	0.170031013623641	0
9215	LARGE	0.170014375590384	0
10758	TRAF3IP2	0.169999476602282	0
6511	SLC1A6	0.169993518580364	0
782	CACNB1	0.169991339736385	0
7280	TUBB2A	0.169989285217813	0
196441	ZFC3H1	0.169984510658689	0
5252	PHF1	0.169975288209912	0
10396	ATP8A1	0.169942540638135	0
23253	ANKRD12	0.169916491269695	0
11054	OGFR	0.169877038513906	0
4976	OPA1	0.169874156883136	0
57216	VANGL2	0.16985370904135	0
3954	LETM1	0.169844693328908	0
59345	GNB4	0.169825650106987	0
25930	PTPN23	0.169810463414358	0
79982	DNAJB14	0.16979975021878	0
10943	MSL3	0.169798920376006	0
84726	PRRC2B	0.16976057693616	0
3628	INPP1	0.169700737836283	0
55103	RALGPS2	0.169670532003012	0
23119	HIC2	0.169651482138879	0
273	AMPH	0.169579622768513	0
64599	GIGYF1	0.169567704520186	3+
9590	AKAP12	0.169544525753624	0
26505	CNNM3	0.169522195282655	0
63897	HEATR6	0.16951702695231	0
5986	RFNG	0.169419792183552	0
55898	UNC45A	0.169410293246972	0
730094	C16orf52	0.169402863150005	0
9706	ULK2	0.169401056063064	0
317762	CCDC85C	0.169396821587658	0
9760	TOX	0.1693610882948	0
53822	FXYD7	0.169341459080486	0
54467	ANKIB1	0.169326137672841	0
63827	BCAN	0.16931480465169	0
10014	HDAC5	0.169269925647069	0
219333	USP12	0.169252768160774	0
7844	RNF103	0.169244344611403	0
153222	CREBRF	0.169231815368606	0
1445	CSK	0.169212230104696	0
23112	TNRC6B	0.169196160563204	2
29855	UBN1	0.169191129104394	0
25789	TMEM59L	0.169184427623952	0
91775	NXPE3	0.169165673965564	0
100132406	NBPF10	0.169112080173954	0
9665	KIAA0430	0.169103825887645	0
401548	SNX30	0.169103805948823	0
23270	TSPYL4	0.169007761883782	0
3786	KCNQ3	0.168998816404375	0
27075	TSPAN13	0.168989396587984	0
79811	SLTM	0.168974741173446	0
4645	MYO5B	0.168963242765686	0
200734	SPRED2	0.168932666570121	1
26047	CNTNAP2	0.168928755724453	0
284900	TTC28-AS1	0.168916918057953	0
9344	TAOK2	0.168907806978494	2
29942	PURG	0.168870333211664	0
23352	UBR4	0.168851530501501	0
64426	SUDS3	0.168820843763154	0
22858	ICK	0.168806046930752	0
2901	GRIK5	0.168801024993058	0
10382	TUBB4A	0.168789599350319	0
29890	RBM15B	0.168783097290797	0
10608	MXD4	0.168775378378413	0
1804	DPP6	0.168734838085007	0
28962	OSTM1	0.168734712057638	0
101927374	LOC101927374	0.168708909084308	0
7290	HIRA	0.168654075102245	0
22979	EFR3B	0.168640451176066	0
23152	CIC	0.168637211997156	1
619279	ZNF704	0.168616853985062	0
114795	TMEM132B	0.168597059412478	1
2794	GNL1	0.168591502872864	0
115703	ARHGAP33	0.168589740610988	0
83694	RPS6KL1	0.168587192664139	0
2621	GAS6	0.168573314538741	0
5426	POLE	0.168517800612816	0
57523	NYNRIN	0.168505592920546	0
6625	SNRNP70	0.16847773164915	0
439921	MXRA7	0.16847380545846	0
55915	LANCL2	0.168470809325248	0
818	CAMK2G	0.168446505002228	0
26038	CHD5	0.168392093118604	0
10423	CDIPT	0.168383773509595	0
84376	HOOK3	0.168367993832548	0
728927	ZNF736	0.168366738346413	0
55615	PRR5	0.16834432976497	0
84678	KDM2B	0.168343212189604	0
100216546	LINC01004	0.168237311966462	0
9513	FXR2	0.168222479683022	0
11094	CACFD1	0.168191912650343	0
646214	LOC646214	0.168179944063333	0
10817	FRS3	0.168170066064366	0
23049	SMG1	0.168136620379257	0
89890	KBTBD6	0.16813243806056	0
10207	INADL	0.168127030370172	1
7917	BAG6	0.168122545137676	0
2047	EPHB1	0.168114092357781	0
3815	KIT	0.168092447714804	0
30011	SH3KBP1	0.168039313871506	0
55827	DCAF6	0.168024028748128	0
4077	NBR1	0.168019569756054	0
80256	FAM214B	0.167956667931483	0
6936	GCFC2	0.167926123578873	0
440556	LINC00982	0.167925390257929	0
9581	PREPL	0.167915857618008	0
100316904	SAP25	0.167904499112462	0
7248	TSC1	0.167893000703276	0
57531	HACE1	0.167860173975545	0
3845	KRAS	0.167834880161907	0
403341	ZBTB34	0.16783256436156	0
2767	GNA11	0.167824791322821	0
548645	DNAJC25	0.167802911087936	0
8932	MBD2	0.167798962361693	0
9334	B4GALT5	0.167773082748429	0
9568	GABBR2	0.167771423013024	0
7571	ZNF23	0.167751511110757	0
2745	GLRX	0.167743766164735	0
109	ADCY3	0.167712566604058	0
23008	KLHDC10	0.167693250911167	1
57182	ANKRD50	0.167641177930404	0
9910	RABGAP1L	0.167629893763181	0
81846	SBF2	0.167594302854408	0
22808	MRAS	0.167593992831063	0
10397	NDRG1	0.167582606698364	0
55680	RUFY2	0.167576429581805	0
253943	YTHDF3	0.167569041139609	0
1004	CDH6	0.167528199221362	0
253635	GPATCH11	0.167501588068603	0
89927	C16orf45	0.167493838202683	0
11127	KIF3A	0.167478121775583	0
6455	SH3GL1	0.167472736177671	0
79143	MBOAT7	0.167446548090448	0
51347	TAOK3	0.167437641055523	0
64853	AIDA	0.167422100790397	0
2931	GSK3A	0.167396859154035	0
55530	SVOP	0.1673943219692	0
1130	LYST	0.167364920894867	0
114794	ELFN2	0.167345286121512	0
441151	TMEM151B	0.167332827527983	0
23141	ANKLE2	0.167331561900642	0
55108	BSDC1	0.167324160106501	1
1938	EEF2	0.167310589581249	0
81	ACTN4	0.167289519574353	0
64359	NXN	0.167286782315287	0
115426	UHRF2	0.167273623416645	0
26064	RAI14	0.167226703151391	0
55844	PPP2R2D	0.167215701505615	0
8745	ADAM23	0.16720197869821	0
283643	C14orf80	0.167139821485297	0
79002	C19orf43	0.167126758669039	0
9320	TRIP12	0.1671119170411	0
85456	TNKS1BP1	0.167097062523168	0
55095	SAMD4B	0.167091141339991	0
2009	EML1	0.167082504224394	0
9040	UBE2M	0.167081218921272	0
51479	ANKFY1	0.167059996661	0
3098	HK1	0.167057381347085	0
9452	ITM2A	0.167006286893501	0
23240	KIAA0922	0.16700029114082	0
7852	CXCR4	0.166993985859339	0
55073	LRRC37A4P	0.166989683903205	0
9693	RAPGEF2	0.166984919229637	0
440423	SUZ12P1	0.166976684030241	0
23211	ZC3H4	0.166976162345559	1
256356	GK5	0.166947546609457	0
867	CBL	0.166922748333184	0
399664	MEX3D	0.166896305779595	0
285600	KIAA0825	0.166850663117052	0
100874243	PRICKLE2-AS3	0.166778656870249	0
5218	CDK14	0.166769552083698	0
57186	RALGAPA2	0.166738576708302	0
5291	PIK3CB	0.166727258311453	0
4753	NELL2	0.166697561424319	0
112885	PHF21B	0.166657882248073	0
79772	MCTP1	0.166650640007173	0
338692	ANKRD13D	0.166612723423785	0
57470	LRRC47	0.166595359674862	0
23151	GRAMD4	0.166545618624818	0
51028	VPS36	0.16653885884026	0
7220	TRPC1	0.166523857045547	0
23022	PALLD	0.166470467559872	0
8881	CDC16	0.166398368313178	0
54617	INO80	0.166340327895276	0
441081	LOC441081	0.166298896395562	0
58509	CACTIN	0.166292599474496	0
8085	KMT2D	0.166290071678692	0
7625	ZNF74	0.166191428505643	0
10123	ARL4C	0.166176337684762	0
9857	CEP350	0.166168913950195	0
79034	C7orf26	0.166093902766788	0
535	ATP6V0A1	0.166080036241011	0
10156	RASA4	0.166045061960159	0
1213	CLTC	0.166030732817227	0
142891	SAMD8	0.166010267732328	0
126299	ZNF428	0.165991087593124	0
51555	PEX5L	0.165981738772316	0
10846	PDE10A	0.165977296765986	0
54492	NEURL1B	0.165967943988581	0
22883	CLSTN1	0.165965318709558	0
55228	PNMAL1	0.165954777328542	0
64224	HERPUD2	0.165950421297146	0
3767	KCNJ11	0.165902256688878	0
729991	MEF2BNB	0.165894264075965	0
153733	CCDC112	0.165879349608267	0
22920	KIFAP3	0.165875465843392	0
9378	NRXN1	0.165860022759879	0
55311	ZNF444	0.165858646030825	0
50809	HP1BP3	0.165811207423314	0
92912	UBE2Q2	0.165801283959266	0
11073	TOPBP1	0.165730799163705	1
7528	YY1	0.16568546744005	0
6257	RXRB	0.165675905504557	0
23392	KIAA0368	0.165675090871417	0
55809	TRERF1	0.165667220989753	0
54812	AFTPH	0.165649741953642	0
84890	ADO	0.165645222275889	0
414	ARSD	0.1656339969091	0
22850	ADNP2	0.165633280901722	0
285172	FAM126B	0.165604697880828	0
57189	KIAA1147	0.165567348384041	0
23232	TBC1D12	0.165510460346694	0
2771	GNAI2	0.165481050526658	0
5311	PKD2	0.165472874327633	0
7259	TSPYL1	0.165434413684019	0
2962	GTF2F1	0.165366353887004	0
8729	GBF1	0.165351849444414	0
55163	PNPO	0.165343002370125	0
57542	KLHL42	0.165339326973521	0
6695	SPOCK1	0.165338959202373	0
10740	RFPL1S	0.165331549547658	0
91	ACVR1B	0.165324921121847	0
89796	NAV1	0.165300217576155	0
1124	CHN2	0.165261331535023	0
57506	MAVS	0.165260533844616	0
3785	KCNQ2	0.16526014692608	2
266727	MDGA1	0.165242064279383	0
6561	SLC13A1	0.165210091561218	0
23731	TMEM245	0.165202071125672	0
83886	PRSS27	0.165183980723064	0
2781	GNAZ	0.16516849558231	0
29934	SNX12	0.165157298754847	0
7745	ZKSCAN8	0.165151281304385	0
55205	ZNF532	0.165142406222458	0
9349	RPL23	0.16507985798699	0
4084	MXD1	0.165066186368972	0
4294	MAP3K10	0.165004042713726	0
79570	NKAIN1	0.164971813720637	0
147687	ZNF417	0.164934966437441	0
11261	CHP1	0.164912215136635	0
643836	ZFP62	0.164895325582757	0
8148	TAF15	0.164883336503219	0
100190939	TPT1-AS1	0.164871621772586	0
126282	TNFAIP8L1	0.164870119952708	0
55521	TRIM36	0.164869737714887	0
5727	PTCH1	0.164863697439388	0
23544	SEZ6L	0.164850696662472	0
10746	MAP3K2	0.16484233679822	0
9826	ARHGEF11	0.164801330274526	0
79095	C9orf16	0.164757062829447	0
91404	SESTD1	0.164730874519933	0
56953	NT5M	0.164693686745579	0
7024	TFCP2	0.16466492296295	0
1000	CDH2	0.16466032505349	0
284252	KCTD1	0.1646405577792	0
8427	ZNF282	0.164619086634523	0
57198	ATP8B2	0.164545606690807	0
57579	FAM135A	0.164545477020651	0
460	ASTN1	0.164542966693526	0
80142	PTGES2	0.164535460262213	0
64746	ACBD3	0.164522174890263	0
54764	ZRANB1	0.164518437636311	0
11154	AP4S1	0.164506174662719	0
9331	B4GALT6	0.164500628088008	0
9538	EI24	0.164491614443907	0
3267	AGFG1	0.164468495167018	0
79720	VPS37B	0.164445359286778	0
58986	TMEM8A	0.164423707891033	0
10585	POMT1	0.164420610167442	0
55788	LMBRD1	0.164380108214205	0
56937	PMEPA1	0.164347384859076	0
2957	GTF2A1	0.164342211742607	0
7994	KAT6A	0.164341057460746	1
5763	PTMS	0.164320664320264	1
84251	SGIP1	0.164319537878791	0
10057	ABCC5	0.164264637890331	0
113419	TEX261	0.164255738696009	0
4204	MECP2	0.164248445779102	3+
23387	SIK3	0.164240221186727	1
5980	REV3L	0.164228218508335	0
340719	NANOS1	0.164205236564171	0
84966	IGSF21	0.164175591467618	0
55686	MREG	0.164163213870604	0
7046	TGFBR1	0.164103384196441	0
5361	PLXNA1	0.164098304177799	0
54437	SEMA5B	0.164081166792717	0
1946	EFNA5	0.164038521657474	0
494115	RBMXL1	0.163989771849176	0
7159	TP53BP2	0.163976420257031	0
6687	SPG7	0.163969164749305	0
2768	GNA12	0.163855641749215	0
23508	TTC9	0.163841628942684	0
266812	NAP1L5	0.163836943702164	0
9439	MED23	0.163786787761994	0
26091	HERC4	0.163784659228733	0
7812	CSDE1	0.16373080201298	0
1185	CLCN6	0.163718437449448	0
3182	HNRNPAB	0.163694498136134	0
353088	ZNF429	0.163665123998859	0
64773	PCED1A	0.163647365527492	0
23426	GRIP1	0.163529827524081	0
8428	STK24	0.163493063900539	0
8451	CUL4A	0.163490989013646	0
101929570	LOC101929570	0.163467403653191	0
10561	IFI44	0.163462439477495	0
283464	GXYLT1	0.163414856288936	0
4853	NOTCH2	0.163405684887	0
84552	PARD6G	0.163405067897237	0
5978	REST	0.163404253461752	0
482	ATP1B2	0.163374247073199	0
91039	DPP9	0.163355733996191	0
161145	TMEM229B	0.163334644296325	0
4326	MMP17	0.163326400456263	0
8939	FUBP3	0.163286840597322	0
27351	DESI1	0.163285938504695	0
286205	SCAI	0.16324262134535	0
9931	HELZ	0.163204647917759	0
10628	TXNIP	0.163179042004208	0
101928812	LOC101928812	0.163135147560616	0
23518	R3HDM1	0.163112807864625	0
143686	SESN3	0.163100641547964	0
10938	EHD1	0.163094611349646	0
8140	SLC7A5	0.163058893714979	0
25831	HECTD1	0.163051762087716	1
284161	GDPD1	0.163048722380623	0
8522	GAS7	0.163012829484025	0
1371	CPOX	0.162997694418745	0
4047	LSS	0.162982957042859	0
55327	LIN7C	0.162966335972967	0
9873	FCHSD2	0.162955710597002	0
6421	SFPQ	0.162881967872522	0
1657	DMXL1	0.162881371510687	0
57106	NAT14	0.162841817496617	0
728215	FAM155A	0.162804528800104	0
80013	FAM188A	0.162786504213132	0
11278	KLF12	0.162773382324943	0
100874375	FAM155A-IT1	0.162727493128042	0
1119	CHKA	0.162697814073498	0
23250	ATP11A	0.162672405597706	0
11000	SLC27A3	0.162669611156324	0
10802	SEC24A	0.162583599236801	0
493812	HCG11	0.162578830752591	0
27154	BRPF3	0.162577611450025	0
23230	VPS13A	0.162544169121124	0
80055	PGAP1	0.162485581247399	0
23513	SCRIB	0.162483658645484	0
57109	REXO4	0.162469622986161	0
55721	IQCC	0.162443394007914	0
80025	PANK2	0.162440406748294	0
139065	SLITRK4	0.162409444314224	0
100303755	PET117	0.162396896252558	0
503693	LOH12CR2	0.162394798006434	0
4126	MANBA	0.162382367004106	0
128077	LIX1L	0.162352097152593	0
79602	ADIPOR2	0.162346751185628	0
5331	PLCB3	0.162340767406635	0
2254	FGF9	0.162331761992279	0
9373	PLAA	0.162302465704341	0
57593	EBF4	0.16229668891631	0
5412	UBL3	0.162255871107608	0
10152	ABI2	0.162197278868937	0
1837	DTNA	0.162178940631279	0
7871	SLMAP	0.162169227606315	0
54839	LRRC49	0.162092059905725	0
9670	IPO13	0.162059835245675	0
1301	COL11A1	0.162042527172321	0
784	CACNB3	0.162009547009024	0
22906	TRAK1	0.162000779200643	0
253559	CADM2	0.161990736862799	0
51629	SLC25A39	0.161972119926426	1
26058	GIGYF2	0.161904385587662	1
146880	LOC146880	0.161903267352184	0
83719	YPEL3	0.161849566309581	0
8031	NCOA4	0.161778940969449	0
111	ADCY5	0.161755000937845	0
5089	PBX2	0.161746868120007	0
64760	FAM160B2	0.161694573797556	0
10807	SDCCAG3	0.161640291881887	1
2017	CTTN	0.161640018316882	0
57606	SLAIN2	0.161635599269149	0
10059	DNM1L	0.161628095817911	0
10160	FARP1	0.161608668564002	1
5600	MAPK11	0.161546521029213	0
64067	NPAS3	0.161516185294889	0
5780	PTPN9	0.161503262447066	0
54386	TERF2IP	0.161490949481768	0
9779	TBC1D5	0.161479509787882	0
58499	ZNF462	0.161455136448912	1
65981	CAPRIN2	0.161422643664932	0
154807	VKORC1L1	0.161365058430788	0
55312	RFK	0.161364272474714	0
3265	HRAS	0.161345951463621	0
54769	DIRAS2	0.161342943194158	0
10052	GJC1	0.161288332472635	0
90933	TRIM41	0.161240678494399	0
55262	C7orf43	0.161218819437999	0
29888	STRN4	0.161166934742293	0
85021	REPS1	0.161147931372326	0
9867	PJA2	0.161141632601655	0
54947	LPCAT2	0.161128084575432	0
4324	MMP15	0.161086078244954	0
7473	WNT3	0.161079983020203	0
3727	JUND	0.161058714826607	0
79693	YRDC	0.161029663731185	0
387923	SERP2	0.161018155173536	0
84460	ZMAT1	0.161007402846483	0
64328	XPO4	0.160993470112385	1
5575	PRKAR1B	0.160975776109293	1
55435	AP1AR	0.160940283675127	0
5297	PI4KA	0.160840553565511	0
10658	CELF1	0.160805068102019	0
80317	ZKSCAN3	0.16077317464042	0
9567	GTPBP1	0.160773044497592	0
28982	FLVCR1	0.160772476961556	0
26100	WIPI2	0.160727697964466	0
390205	LRRC10B	0.160691027047884	0
55196	KIAA1551	0.160650657138261	0
81669	CCNL2	0.160646214245981	0
5121	PCP4	0.160643626959498	0
10114	HIPK3	0.160612057686212	0
57231	SNX14	0.160587681178308	0
2788	GNG7	0.160579170390046	0
55421	C17orf85	0.160563204284423	0
4741	NEFM	0.160539711846485	0
123879	DCUN1D3	0.160525428631099	0
9392	TGFBRAP1	0.160525119101331	0
1303	COL12A1	0.160522374900069	0
114818	KLHL29	0.160511666909463	0
9710	KIAA0355	0.160508197921671	0
5286	PIK3C2A	0.160499914145338	0
23363	OBSL1	0.160484623573409	0
9962	SLC23A2	0.16047349266161	0
79707	NOL9	0.160459048100086	0
23011	RAB21	0.160456355086537	0
93611	FBXO44	0.1604503067769	0
4040	LRP6	0.16043492580618	1
10594	PRPF8	0.16041627415124	1
6873	TAF2	0.160392247594652	0
10929	SRSF8	0.160341186859857	0
83752	LONP2	0.160338220930903	0
6251	RSU1	0.160336305820744	0
8622	PDE8B	0.160304334462353	0
6777	STAT5B	0.160297389905052	0
8021	NUP214	0.160292638025458	0
57610	RANBP10	0.160289505963228	0
1462	VCAN	0.160200902925648	0
80263	TRIM45	0.160198364131289	0
5728	PTEN	0.160187369472273	2
50649	ARHGEF4	0.160173374827744	0
6311	ATXN2	0.160171091198057	0
4086	SMAD1	0.16016541833947	0
100130958	SYCE1L	0.160152035871104	0
8313	AXIN2	0.16012159540256	0
9282	MED14	0.160091295531656	0
55749	CCAR1	0.160090106675982	0
9794	MAML1	0.160083849635227	0
79173	C19orf57	0.160074093084538	0
3746	KCNC1	0.16003772056657	0
55351	STK32B	0.160004977419891	0
9409	PEX16	0.160004764898006	0
23295	MGRN1	0.159993652800875	1
1773	DNASE1	0.159966415056013	0
374887	YJEFN3	0.159956757156268	0
729956	SHISA7	0.159937022226715	0
79814	AGMAT	0.15993698996871	0
5581	PRKCE	0.159906093279356	0
9690	UBE3C	0.159877611983138	0
8277	TKTL1	0.159876029386911	0
114991	ZNF618	0.159875453604175	0
50855	PARD6A	0.159843609872765	0
2801	GOLGA2	0.159818882632441	0
54461	FBXW5	0.159797976558768	1
1271	CNTFR	0.159797199635228	0
9824	ARHGAP11A	0.15978818434085	0
51754	TMEM8B	0.159768009933774	0
56666	PANX2	0.159759800182395	0
7991	TUSC3	0.159679186816386	0
9778	KIAA0232	0.159646583392083	1
56884	FSTL5	0.159637489541332	0
8496	PPFIBP1	0.159602830130492	0
8629	JRK	0.159602691425666	0
78994	PRR14	0.159574679493938	0
55100	WDR70	0.159573791052572	0
266722	HS6ST3	0.159515825082946	0
9807	IP6K1	0.15950859402823	0
23287	AGTPBP1	0.159497755911966	0
360023	ZBTB41	0.159474213976266	0
488	ATP2A2	0.159452788293089	0
60684	TRAPPC11	0.159414724519131	0
9107	MTMR6	0.159380930622407	0
4850	CNOT4	0.15936847186697	0
1020	CDK5	0.159332945923238	0
8648	NCOA1	0.159273592133112	0
9110	MTMR4	0.159258921806504	0
9605	VPS9D1	0.159244609389071	0
54914	FOCAD	0.159236335952843	0
904	CCNT1	0.159229174149794	0
57786	RBAK	0.159196435276619	0
2204	FCAR	0.159167896384136	0
10227	MFSD10	0.159162278541338	0
4967	OGDH	0.159132329676107	0
57180	ACTR3B	0.1591079354062	0
153090	DAB2IP	0.159107321420038	0
11016	ATF7	0.159080758022139	0
66008	TRAK2	0.159032644792079	0
8900	CCNA1	0.158999297489367	0
11152	WDR45	0.158966977621216	0
[truncated: 9,020 more rows]

## Sheet: Supplemental Table S7B
Supplemental Table S7B. Spearman’s correlation with dnMis-Epi genes in interneurons for epilepsy genes with dnMis mutations.
Column "dnMis-Epi": 2+=at least two dnMis mutations, 1=only one dnMis mutation, and 0=no dnMis mutation.
Gene ID	Symbol	Spearman’s correlation	dnMis-Epi
88	ACTN2	0.314034637423661	0
84894	LINGO1	0.312069589300257	0
816	CAMK2B	0.308455432176223	0
8541	PPFIA3	0.305104014142563	0
9143	SYNGR3	0.304760609186802	0
8842	PROM1	0.303610685477723	0
55638	SYBU	0.303590595191257	0
107	ADCY1	0.302744525379689	0
147381	CBLN2	0.302427995729212	0
27087	B3GAT1	0.302355137097528	0
8786	RGS11	0.300007854148063	0
57636	ARHGAP23	0.299145541065495	0
23025	UNC13A	0.298875024821154	0
5579	PRKCB	0.298026653024892	0
781	CACNA2D1	0.29761168856662	0
116983	ACAP3	0.296145632524552	0
51440	HPCAL4	0.295981359941444	0
4886	NPY1R	0.295508132372098	0
64714	PDIA2	0.295344157631714	0
9856	KIAA0319	0.29369387885353	0
5064	PALM	0.29332772192828	0
57593	EBF4	0.293206704220319	0
8522	GAS7	0.293028386398464	0
23314	SATB2	0.292959528085391	0
162632	USP32P1	0.29178118563498	0
3714	JAG2	0.291682014531036	0
4756	NEO1	0.291093581479112	0
10777	ARPP21	0.290640581537216	0
23348	DOCK9	0.290319356104686	0
114299	PALM2	0.290171096391562	0
27319	BHLHE22	0.289912914502724	0
6860	SYT4	0.28968806577953	0
401647	GOLGA7B	0.289458760521469	0
81553	FAM49A	0.289449623364354	0
375057	C1orf95	0.289286595189485	0
4326	MMP17	0.288424421033088	0
5296	PIK3R2	0.288319495490388	0
1272	CNTN1	0.287586530161368	0
10472	ZBTB18	0.287426518712483	0
64168	NECAB1	0.287373442602047	0
25759	SHC2	0.28707349094768	0
9079	LDB2	0.287044970151901	0
57586	SYT13	0.286760165852989	0
23544	SEZ6L	0.286718017265984	0
773	CACNA1A	0.286525127664477	2+
146330	FBXL16	0.286432438849181	0
79012	CAMKV	0.286115555189903	0
10656	KHDRBS3	0.28573911224058	0
5067	CNTN3	0.285437304107569	0
57662	CAMSAP3	0.285301156665801	0
399947	C11orf87	0.285270618701085	0
10900	RUNDC3A	0.284754962390325	0
266727	MDGA1	0.284419759059975	0
2194	FASN	0.284222059053091	2+
9568	GABBR2	0.283988071333471	2+
2774	GNAL	0.283669549805531	0
5662	PSD	0.283105377826595	0
23768	FLRT2	0.282502064964141	0
27086	FOXP1	0.282418057011013	0
117	ADCYAP1R1	0.282345850503413	0
8525	DGKZ	0.28209500825522	0
214	ALCAM	0.282038297965003	0
5532	PPP3CB	0.282024869138792	0
375790	AGRN	0.281975463121722	0
23286	WWC1	0.281902625518225	0
26086	GPSM1	0.281852172568346	0
9066	SYT7	0.281719161522465	0
128434	VSTM2L	0.281188991799198	0
220594	USP32P2	0.281116602903659	0
2781	GNAZ	0.281025380890888	0
51560	RAB6B	0.280944527475793	0
114784	CSMD2	0.280808112610037	1
57569	ARHGAP20	0.280796704524561	0
147372	CCBE1	0.280582495556215	0
23220	DTX4	0.280470873120791	0
3778	KCNMA1	0.280455755603543	0
80228	ORAI2	0.280414072076998	0
54715	RBFOX1	0.280336893453821	0
59283	CACNG8	0.280203436973733	0
9355	LHX2	0.27984665392802	0
55531	ELMOD1	0.279769793449668	0
55684	RABL6	0.279737754445386	0
80725	SRCIN1	0.27968602332498	0
84467	FBN3	0.279305050890548	0
10749	KIF1C	0.279153634178651	0
85358	SHANK3	0.279081915236461	0
150244	ZDHHC8P1	0.278986895652907	0
5783	PTPN13	0.278918989776362	0
2902	GRIN1	0.278907746317741	2+
3300	DNAJB2	0.27886845866797	0
5214	PFKP	0.278836096022402	0
57574	MARCH4	0.278658140649891	0
23542	MAPK8IP2	0.278444280997493	0
79085	SLC25A23	0.278432887024421	0
3708	ITPR1	0.278388991259282	0
27445	PCLO	0.27831178100189	0
338707	B4GALNT4	0.278123681362143	0
9890	LPPR4	0.277853576852005	0
10052	GJC1	0.277535942120815	0
51477	ISYNA1	0.277449645707448	0
345630	FBLL1	0.277373864277521	0
4023	LPL	0.277230871229546	0
64762	GAREM	0.277141882411575	0
5605	MAP2K2	0.277105594721641	0
23362	PSD3	0.277086537567282	0
139728	PNCK	0.277010355206705	0
23518	R3HDM1	0.276468827316321	0
4784	NFIX	0.276290505792518	0
4045	LSAMP	0.276229016019211	0
4761	NEUROD2	0.276196263527386	0
84446	BRSK1	0.275966156092125	0
9796	PHYHIP	0.275819062756221	0
8704	B4GALT2	0.27575839454449	0
1363	CPE	0.275477057557468	0
6904	TBCD	0.27539059218502	0
23531	MMD	0.275376316032898	0
57731	SPTBN4	0.27536888202078	0
6335	SCN9A	0.275299558344522	0
9371	KIF3B	0.275192698092893	0
6804	STX1A	0.275082765650024	0
2051	EPHB6	0.275067024725167	0
23108	RAP1GAP2	0.274911634277768	0
156	ADRBK1	0.274702460021798	0
57689	LRRC4C	0.274473190599346	0
55502	HES6	0.27445109741877	0
10522	DEAF1	0.274420658740521	0
9256	BZRAP1	0.274347860731458	0
55816	DOK5	0.274330649844098	0
27239	GPR162	0.274319589293003	0
10675	CSPG5	0.274303242360482	0
117178	SSX2IP	0.27418067689616	0
1501	CTNND2	0.274180319391716	0
83698	CALN1	0.273997171537376	0
79762	C1orf115	0.273665202827086	0
2170	FABP3	0.273518462787223	0
25830	SULT4A1	0.273195208744041	0
129080	EMID1	0.273049301767776	0
28964	GIT1	0.273036798140997	0
6833	ABCC8	0.273020056247418	0
10290	SPEG	0.27298178533365	0
2977	GUCY1A2	0.272900947022517	0
150726	FBXO41	0.272885746793681	0
728215	FAM155A	0.272800923888582	0
9479	MAPK8IP1	0.27279418107483	1
53358	SHC3	0.27267702133948	0
8822	FGF17	0.272673770221918	0
4915	NTRK2	0.272489880355842	0
3995	FADS3	0.272434468231134	0
9024	BRSK2	0.272332645961562	0
89797	NAV2	0.272311300539831	0
254263	CNIH2	0.272271850719981	0
26012	NSMF	0.272245743934417	0
4135	MAP6	0.272143562225043	0
113146	AHNAK2	0.27206320080281	0
148014	TTC9B	0.272011841798911	0
9920	KBTBD11	0.271810598061234	0
5339	PLEC	0.271725398969723	0
8911	CACNA1I	0.271641340519739	0
6326	SCN2A	0.271448188680174	2+
340371	NRBP2	0.271404350054856	0
1795	DOCK3	0.271322157072717	0
404217	CTXN1	0.271005641016005	0
6723	SRM	0.270905445959268	0
4597	MVD	0.270854502934724	0
9394	HS6ST1	0.270677610844534	0
2182	ACSL4	0.27059373528659	0
55294	FBXW7	0.270541544956524	0
120114	FAT3	0.270198330354969	0
116986	AGAP2	0.27016938559342	0
5577	PRKAR2B	0.269927481441662	0
114876	OSBPL1A	0.26990328115208	0
4753	NELL2	0.269821280615809	0
56475	RPRM	0.269760681903035	0
3097	HIVEP2	0.269601419695937	0
51678	MPP6	0.269502558324873	0
4650	MYO9B	0.269365837377133	0
3983	ABLIM1	0.269206708992199	0
6319	SCD	0.269145282417769	0
4185	ADAM11	0.269033652496877	0
92558	CCDC64	0.269031708420919	0
80309	SPHKAP	0.26898430230896	0
5594	MAPK1	0.268911851130895	0
22874	PLEKHA6	0.268691202016162	0
9899	SV2B	0.268671371430286	0
376267	RAB15	0.268638102803726	0
1954	MEGF8	0.268516628482439	0
58480	RHOU	0.268480196542985	0
57595	PDZD4	0.268475984001269	0
8496	PPFIBP1	0.268247904232997	0
51310	SLC22A17	0.268125637934025	0
80331	DNAJC5	0.267946185659112	0
6503	SLA	0.267914393713408	0
56975	FAM20C	0.267895274159498	0
57715	SEMA4G	0.26781691468248	0
26038	CHD5	0.267634388669934	0
9762	LZTS3	0.267634087299664	0
54932	EXD3	0.26738328039358	0
5796	PTPRK	0.26736755498358	0
55558	PLXNA3	0.267333645777314	0
10361	NPM2	0.267055308031362	0
53822	FXYD7	0.266998686413723	0
55321	TMEM74B	0.266795495776576	0
26053	AUTS2	0.266705585812748	0
55351	STK32B	0.266695501699894	0
4037	LRP3	0.266599090667789	0
57655	GRAMD1A	0.266547349036126	0
6721	SREBF2	0.266465477302033	0
55016	MARCH1	0.26640817883959	0
161145	TMEM229B	0.266331719971479	0
5600	MAPK11	0.26618283051535	0
84264	HAGHL	0.266146287314674	0
8566	PDXK	0.266099146111637	0
4212	MEIS2	0.26609526028094	0
163175	LGI4	0.265906102019905	0
5295	PIK3R1	0.265749922035412	0
6861	SYT5	0.265653140159226	0
1759	DNM1	0.265600563807299	2+
3614	IMPDH1	0.265438678779927	0
774	CACNA1B	0.265405376599704	0
50632	CALY	0.265339314918763	0
23263	MCF2L	0.265309098540935	0
91584	PLXNA4	0.265234407230608	0
94235	GNG8	0.265215334247031	0
407738	FAM19A1	0.265134659586824	0
440730	TRIM67	0.265126867535349	0
10512	SEMA3C	0.265124053454432	0
6497	SKI	0.265050767545403	0
64838	FNDC4	0.264690667081604	0
25920	NELFB	0.264624529139761	0
7301	TYRO3	0.26459568600296	0
6595	SMARCA2	0.264575291267741	1
5792	PTPRF	0.264524301109805	0
6305	SBF1	0.264427042598608	0
7423	VEGFB	0.264368260064575	0
9649	RALGPS1	0.264366377784983	1
283638	CEP170B	0.263936478851884	0
1780	DYNC1I1	0.263924416622455	0
5361	PLXNA1	0.263893099897902	1
91300	R3HDM4	0.26387385074228	0
8502	PKP4	0.263717406255937	0
94032	CAMK2N2	0.263599293863158	0
55690	PACS1	0.263594606494717	1
115704	EVI5L	0.263539729688077	0
9755	TBKBP1	0.263495119216913	0
440300	LOC440300	0.263441273342578	0
6585	SLIT1	0.263408628510629	1
80790	CMIP	0.263371326149181	0
3157	HMGCS1	0.263317442315148	0
57176	VARS2	0.263297202668969	0
2281	FKBP1B	0.263095074881505	0
94030	LRRC4B	0.263044299402243	0
145773	FAM81A	0.263037525308809	0
284361	EMC10	0.262985679804113	0
7392	USF2	0.262978964913939	0
5454	POU3F2	0.26297430851021	0
23026	MYO16	0.262808076722009	0
338692	ANKRD13D	0.262773482493729	0
116988	AGAP3	0.262704647815998	0
758	MPPED1	0.262679625634922	0
54873	PALMD	0.262195575312121	0
130026	ICA1L	0.262184993516614	0
100128590	SLC8A1-AS1	0.262184156050137	0
4008	LMO7	0.262179151917173	0
54935	DUSP23	0.26214940737753	0
375449	MAST4	0.262118188222927	0
284001	CCDC57	0.262096795503656	0
7204	TRIO	0.262011001520973	1
10447	FAM3C	0.261846343339256	0
83933	HDAC10	0.261845598287443	0
9145	SYNGR1	0.261644909431595	0
23158	TBC1D9	0.261631133353907	0
22873	DZIP1	0.261568519184454	0
4145	MATK	0.261371222844012	0
10397	NDRG1	0.2613395708694	0
149603	RNF187	0.261319525518634	0
4524	MTHFR	0.261288660196961	0
1012	CDH13	0.261212822680541	0
6511	SLC1A6	0.261194986989176	0
57526	PCDH19	0.261183267780499	0
1917	EEF1A2	0.26116215518423	2+
3631	INPP4A	0.261019564503134	0
79158	GNPTAB	0.260897744315554	0
23345	SYNE1	0.26089405471963	0
57026	PDXP	0.260758986722255	0
1534	CYB561	0.260724934044256	0
10154	PLXNC1	0.260640365308496	0
10529	NEBL	0.260620603631226	0
163404	LPPR5	0.260580056130082	0
266722	HS6ST3	0.260317325548801	0
8527	DGKD	0.260245616437951	0
11007	CCDC85B	0.260190891407927	0
31	ACACA	0.260165129239306	0
1840	DTX1	0.260138661514676	0
9783	RIMS3	0.260068786874284	0
5905	RANGAP1	0.260054638584543	2+
84966	IGSF21	0.26003752137128	0
1466	CSRP2	0.259941266560389	0
83988	NCALD	0.259933170394432	0
6625	SNRNP70	0.259848388418147	0
1804	DPP6	0.259669842282908	0
127829	ARL8A	0.259658217756402	0
222865	TMEM130	0.259598138030139	0
152330	CNTN4	0.259479221018444	0
6253	RTN2	0.259424371382601	0
8831	SYNGAP1	0.259288323577979	0
91304	TMEM259	0.259270579047316	0
1762	DMWD	0.259138540314928	0
57338	JPH3	0.259097292979849	0
84440	RAB11FIP4	0.259067178757318	0
9040	UBE2M	0.259063065058843	0
6711	SPTBN1	0.25903160494508	0
1032	CDKN2D	0.258936030990342	0
491	ATP2B2	0.258888924367238	0
9379	NRXN2	0.258790754661782	0
121601	ANO4	0.258549321855883	0
11031	RAB31	0.258541167177967	0
6620	SNCB	0.258472242753797	0
23288	IQCE	0.258169950354355	0
6854	SYN2	0.258000854347824	0
10160	FARP1	0.257987984058083	0
6604	SMARCD3	0.257985291744133	0
23114	NFASC	0.257950839884697	1
11076	TPPP	0.25775348887245	0
93145	OLFM2	0.257719916718363	0
3911	LAMA5	0.257717063127	0
166336	PRICKLE2	0.257324948939888	0
3423	IDS	0.257225040480744	0
57596	BEGAIN	0.257208306274695	0
10501	SEMA6B	0.257117951703411	0
30815	ST6GALNAC6	0.257073228672952	0
51046	ST8SIA3	0.257037803125191	0
4646	MYO6	0.256940217330717	0
9829	DNAJC6	0.256929406103601	0
2931	GSK3A	0.256884245167536	0
57575	PCDH10	0.256843345864561	0
2059	EPS8	0.256792348703835	0
5310	PKD1	0.256756230973937	1
9672	SDC3	0.256629674140113	0
1718	DHCR24	0.25656167826274	0
10500	SEMA6C	0.256561511165137	0
54681	P4HTM	0.2565106312145	0
64753	CCDC136	0.256481720706406	0
37	ACADVL	0.256481242985892	0
25907	TMEM158	0.256467122991875	0
23015	GOLGA8A	0.25640881079321	0
23174	ZCCHC14	0.256388383178527	0
146713	RBFOX3	0.25634189893761	0
23313	KIAA0930	0.256339946347701	0
10645	CAMKK2	0.256252872793867	0
5802	PTPRS	0.256235540331217	0
140467	ZNF358	0.256146959242894	0
3801	KIFC3	0.256145993155673	0
5453	POU3F1	0.256141095572128	0
6622	SNCA	0.256121480646391	0
10156	RASA4	0.256057464636643	0
57523	NYNRIN	0.256000064519332	0
134111	UBE2QL1	0.25594810731357	0
83856	FSD1L	0.255897092331621	0
5198	PFAS	0.255843722982047	0
9435	CHST2	0.255828973886493	0
79137	FAM134A	0.255776701283412	1
284339	TMEM145	0.255765373656118	0
150	ADRA2A	0.255738382940577	0
7077	TIMP2	0.255734929518799	0
8943	AP3D1	0.25572667350706	0
9737	GPRASP1	0.255599505761623	0
170961	ANKRD24	0.255554306993175	1
727800	RNF208	0.255542197578913	0
147906	DACT3	0.255424285241036	0
3786	KCNQ3	0.255400194631006	1
441172	FLJ46906	0.255391174604084	0
23359	FAM189A1	0.255220855251591	0
9600	PITPNM1	0.255203868482598	0
9892	SNAP91	0.255178988387992	0
4298	MLLT1	0.255153703446444	0
26050	SLITRK5	0.255114661234662	0
7461	CLIP2	0.255082144434092	0
23037	PDZD2	0.254836083112532	0
1119	CHKA	0.254788870726384	0
2622	GAS8	0.254755228330261	0
1428	CRYM	0.254730647583856	0
1741	DLG3	0.254650533970153	0
90007	MIDN	0.254646249771943	0
10235	RASGRP2	0.254519619628194	0
4130	MAP1A	0.25450078464559	0
10000	AKT3	0.254496911155711	0
84870	RSPO3	0.254415691888187	0
2562	GABRB3	0.254141438265177	2+
6508	SLC4A3	0.254000466403467	0
23524	SRRM2	0.253838302397602	0
8445	DYRK2	0.253829755968344	0
54463	FAM134B	0.253784639253519	0
8567	MADD	0.25376604943038	0
8492	PRSS12	0.253717186145259	0
2775	GNAO1	0.253647226228264	2+
84501	SPIRE2	0.253628469104359	0
79570	NKAIN1	0.253567311430204	0
57030	SLC17A7	0.253564013399486	0
23510	KCTD2	0.253538397869049	0
54540	FAM193B	0.253496655388964	0
81794	ADAMTS10	0.253485957308734	0
79888	LPCAT1	0.253467306827437	0
23148	NACAD	0.253452742313078	0
149076	ZNF362	0.253429447746257	0
23400	ATP13A2	0.253361033684793	0
1137	CHRNA4	0.253325629654384	0
2009	EML1	0.253298781610384	0
666	BOK	0.253113975925695	0
84033	OBSCN	0.25311391102069	0
158056	MAMDC4	0.25306940261618	0
124930	ANKRD13B	0.25303068912725	0
2982	GUCY1A3	0.252984308959554	0
25851	TECPR1	0.252932497380679	0
81706	PPP1R14C	0.252649846466437	0
57659	ZBTB4	0.252639762157271	0
84444	DOT1L	0.252561714952672	0
3897	L1CAM	0.252389002785771	0
8941	CDK5R2	0.25225971305305	0
51466	EVL	0.252243657267982	0
55624	POMGNT1	0.25222171220997	0
25945	PVRL3	0.252218872833546	0
6482	ST3GAL1	0.252218749784293	0
9764	KIAA0513	0.252069839237497	0
4208	MEF2C	0.25195019830949	1
114787	GPRIN1	0.251856445080857	0
7791	ZYX	0.251843460006182	0
57282	SLC4A10	0.251822005600477	0
9348	NDST3	0.251699285362046	0
5179	PENK	0.251685413984102	0
9415	FADS2	0.251672917257163	0
58489	ABHD17C	0.251663711362409	0
84258	SYT3	0.251660982990598	0
287	ANK2	0.251651272506404	0
6666	SOX12	0.251481403967014	0
653784	MZT2A	0.251455264103511	0
65264	UBE2Z	0.251415940018214	0
2922	GRP	0.251406515966866	0
85378	TUBGCP6	0.251359879690917	0
57465	TBC1D24	0.25135197241544	0
26115	TANC2	0.25132459906639	0
255743	NPNT	0.251252371169429	0
1760	DMPK	0.251244622183345	0
1487	CTBP1	0.251157985435899	0
51555	PEX5L	0.251125109043483	0
9564	BCAR1	0.25104550326507	0
80700	UBXN6	0.250840906805189	0
274	BIN1	0.250692521080915	0
54536	EXOC6	0.250678641646746	0
2746	GLUD1	0.250653911360621	0
56894	AGPAT3	0.250569974152583	1
2835	GPR12	0.250541856108597	0
826	CAPNS1	0.250535616087766	0
1107	CHD3	0.25049447345868	0
26059	ERC2	0.250446079526275	0
84687	PPP1R9B	0.250436756402946	0
22941	SHANK2	0.250368823741574	0
55738	ARFGAP1	0.250289965835653	0
440270	GOLGA8B	0.250288597487885	0
6014	RIT2	0.250203017408507	0
54862	CC2D1A	0.250159822207227	0
9170	LPAR2	0.250126731646428	0
57579	FAM135A	0.250081521133719	0
2560	GABRB1	0.25003290742874	1
777	CACNA1E	0.250005758573763	1
154215	NKAIN2	0.249997341806817	0
27345	KCNMB4	0.249861130593911	0
488	ATP2A2	0.249798183638008	0
3815	KIT	0.249784115817253	0
9253	NUMBL	0.249750005230543	0
3265	HRAS	0.249740158415866	0
57801	HES4	0.249739759693858	0
41	ASIC1	0.249713371363135	0
342977	NANOS3	0.249704097077185	0
8204	NRIP1	0.249673540364341	0
5274	SERPINI1	0.249661760609088	0
11033	ADAP1	0.249631039046794	0
100874243	PRICKLE2-AS3	0.2495431375392	0
375323	LHFPL4	0.249518608797662	0
80335	WDR82	0.249496725219344	0
8543	LMO4	0.249220405112798	0
54976	C20orf27	0.249208425651409	0
26262	TSPAN17	0.249156366705546	0
2036	EPB41L1	0.249150167074268	0
53615	MBD3	0.249066984420527	0
63974	NEUROD6	0.249065472062837	0
21	ABCA3	0.249017526449217	0
6588	SLN	0.248911819447912	0
221935	SDK1	0.248894820249475	0
643988	C1orf233	0.248851479288622	0
51754	TMEM8B	0.248804715665848	0
5452	POU2F2	0.248728950881925	0
26960	NBEA	0.24872624039266	0
58525	WIZ	0.248601730529757	0
5986	RFNG	0.248539062313985	0
11182	SLC2A6	0.248461544422309	0
29888	STRN4	0.248388627167689	0
57605	PITPNM2	0.248368799260571	0
6712	SPTBN2	0.248297089831293	0
138046	RALYL	0.248186724874161	0
80781	COL18A1	0.248160023383868	0
114800	CCDC85A	0.248152813389521	0
2185	PTK2B	0.248122284407496	0
727957	MROH1	0.248072269036609	0
10423	CDIPT	0.248052897285831	0
2561	GABRB2	0.247965893385574	0
26173	INTS1	0.247863559204478	0
80128	TRIM46	0.24773573233417	0
144404	TMEM120B	0.247732320278678	0
975	CD81	0.247725458723127	0
134957	STXBP5	0.247650822501567	0
57488	ESYT2	0.247632159858415	0
1124	CHN2	0.247448728868259	0
56907	SPIRE1	0.247400997913992	0
100190986	LOC100190986	0.247356568241301	0
2039	DMTN	0.247212946143028	0
9334	B4GALT5	0.247139837113562	0
134353	LSM11	0.247096052499813	0
4741	NEFM	0.247037281537581	0
9891	NUAK1	0.24701508055316	0
4047	LSS	0.246879403534281	0
50649	ARHGEF4	0.246778505643225	0
23264	ZC3H7B	0.246755262179153	0
100506990	LOC100506990	0.246734351501699	0
89795	NAV3	0.246724696965599	0
157	ADRBK2	0.246644296468996	0
3705	ITPK1	0.246642300643691	0
6546	SLC8A1	0.246616141532921	1
1855	DVL1	0.246561244207641	0
8216	LZTR1	0.246548734331812	0
80319	CXXC4	0.246526681711692	0
1609	DGKQ	0.246475421431087	0
2889	RAPGEF1	0.246465558765043	0
10458	BAIAP2	0.246452070672864	0
331	XIAP	0.246448468945086	0
151556	GPR155	0.246272731341337	0
6452	SH3BP2	0.246221291267415	0
6457	SH3GL3	0.24618448912112	0
10712	FAM189B	0.246169434098523	0
22846	VASH1	0.246165370619099	0
29903	CCDC106	0.246123711694285	0
23305	ACSL6	0.246112584508029	0
5887	RAD23B	0.246071701274931	0
79786	KLHL36	0.246068136636323	0
22998	LIMCH1	0.24601223845258	0
2817	GPC1	0.246000478056748	0
9757	KMT2B	0.24597570231661	2+
4747	NEFL	0.245953579953983	0
124923	SGK494	0.245952117851319	0
5601	MAPK9	0.245952085287056	0
64221	ROBO3	0.24595013343291	0
5121	PCP4	0.245931285419067	0
79007	DBNDD1	0.245912432479351	0
55800	SCN3B	0.245907938461239	0
254531	LPCAT4	0.245904937725254	0
6262	RYR2	0.245803320009551	0
55700	MAP7D1	0.245798285725112	0
339983	NAT8L	0.245789271881967	0
9914	ATP2C2	0.245762787116739	0
23467	NPTXR	0.245747243705025	0
23254	KAZN	0.245707309439413	0
64760	FAM160B2	0.245620174374394	0
8526	DGKE	0.245610474272323	0
23396	PIP5K1C	0.245607633170212	0
333	APLP1	0.245575456014626	0
221710	SMIM13	0.245573302696588	0
56978	PRDM8	0.245487364996666	0
150759	LINC00342	0.245481318401238	0
55884	WSB2	0.245298547609902	0
26958	COPG2	0.245296879314657	0
23152	CIC	0.245287947763742	0
27	ABL2	0.245123237809193	0
23030	KDM4B	0.245123131141548	0
51199	NIN	0.245097972871006	0
9905	SGSM2	0.245090191443576	0
79608	RIC3	0.244996440278365	0
9771	RAPGEF5	0.2449091390145	0
55352	COPRS	0.244901296283343	0
253559	CADM2	0.244880912448713	0
54806	AHI1	0.244796425421786	0
57553	MICAL3	0.244766650115429	0
53346	TM6SF1	0.244721972957196	0
55084	SOBP	0.244670539796354	0
57469	PNMAL2	0.244636874101112	0
23119	HIC2	0.244624515324443	0
114783	LMTK3	0.24462414281372	0
644150	WIPF3	0.244554147572467	0
2972	BRF1	0.244523195437654	0
90139	TSPAN18	0.244502718404189	0
9317	PTER	0.244496523347053	0
50863	NTM	0.244449724402549	0
55643	BTBD2	0.244444464057627	0
8396	PIP4K2B	0.244428921640205	0
2550	GABBR1	0.244387311560155	0
29887	SNX10	0.244315902230986	0
23162	MAPK8IP3	0.24430014292047	0
5599	MAPK8	0.244221232685764	0
8851	CDK5R1	0.244197577530249	0
2901	GRIK5	0.244141013756222	0
84988	PPP1R16A	0.244137424708476	0
1455	CSNK1G2	0.244106940653001	0
408	ARRB1	0.244096811615818	0
64599	GIGYF1	0.244038823912993	0
1785	DNM2	0.244027940208695	0
51133	KCTD3	0.24401182912543	0
6561	SLC13A1	0.244009080457281	0
23096	IQSEC2	0.24396484326043	1
25758	KIAA1549L	0.243930252855439	0
5865	RAB3B	0.243755449978177	0
90135	BTBD6	0.243687811827306	0
54776	PPP1R12C	0.243678210138179	0
57626	KLHL1	0.243672758268622	0
83719	YPEL3	0.243632174403293	0
65009	NDRG4	0.243562949748223	0
340533	KIAA2022	0.243562770735665	0
80022	MYO15B	0.24349357442604	0
26472	PPP1R14B	0.24347450123661	0
130733	TMEM178A	0.243459030192107	0
222962	SLC29A4	0.243285939261341	0
9980	DOPEY2	0.243269702349129	0
26528	DAZAP1	0.243138178001273	0
2898	GRIK2	0.243068660021061	0
10740	RFPL1S	0.243060923397184	0
56904	SH3GLB2	0.243012886322345	0
6655	SOS2	0.2430035724372	0
6695	SPOCK1	0.242959637558237	0
78999	LRFN4	0.242957745168669	0
56928	SPPL2B	0.242947163162888	0
259217	HSPA12A	0.242945135421661	0
157695	TDRP	0.242864497254741	0
27132	CPNE7	0.242817414781432	0
8648	NCOA1	0.242799313174617	0
4613	MYCN	0.242701502573921	0
29937	NENF	0.242648443603422	0
138050	HGSNAT	0.242487147045849	0
64780	MICAL1	0.242422430217437	0
126567	C2CD4C	0.242340346298993	0
23637	RABGAP1	0.242260776868071	0
204962	SLC44A5	0.242218402604433	0
2786	GNG4	0.242179148164895	0
84668	FAM126A	0.24213287668612	0
8672	EIF4G3	0.24212158248876	0
755	C21orf2	0.242081724264122	0
5141	PDE4A	0.242023588357831	0
79047	KCTD15	0.241996954602454	0
28232	SLCO3A1	0.241971920197844	0
6794	STK11	0.241949648393508	0
8927	BSN	0.241924881147298	0
29952	DPP7	0.241906989658142	1
3762	KCNJ5	0.241836878521028	0
54849	DEF8	0.24181689651484	0
6752	SSTR2	0.241787025457368	0
23246	BOP1	0.241738501013942	0
2888	GRB14	0.241677963582561	0
7915	ALDH5A1	0.241672713927276	0
1740	DLG2	0.241655654024399	0
4916	NTRK3	0.241620906789631	0
91	ACVR1B	0.241599964462987	0
1850	DUSP8	0.241582855261785	0
284047	CCDC144B	0.241572470082267	0
9605	VPS9D1	0.241370990489341	0
79002	C19orf43	0.241331676802295	0
20	ABCA2	0.241327926359485	0
80821	DDHD1	0.241208350757272	0
51363	CHST15	0.241190498901884	0
84937	ZNRF1	0.241110678738106	0
57554	LRRC7	0.241089241542702	0
6919	TCEA2	0.241088852601995	0
64083	GOLPH3	0.241042994353011	0
273	AMPH	0.240938087957656	0
11282	MGAT4B	0.24090101502487	0
84502	JPH4	0.240859198337993	0
18	ABAT	0.240853464084728	1
146923	RUNDC1	0.240843887082451	0
178	AGL	0.240831093421484	0
23300	ATMIN	0.240715476017934	0
2767	GNA11	0.240668426850609	0
2037	EPB41L2	0.240655526875716	0
10659	CELF2	0.240632238232835	0
6894	TARBP1	0.240623105510197	0
1837	DTNA	0.240599717489374	0
10418	SPON1	0.240574669996134	0
142678	MIB2	0.240561928604916	0
2621	GAS6	0.240550218111835	0
4249	MGAT5	0.240538485033831	0
79143	MBOAT7	0.240527097013445	0
114793	FMNL2	0.240518527356263	0
5455	POU3F3	0.240513300794469	0
23413	NCS1	0.240470915756545	0
2802	GOLGA3	0.240423085974905	0
6257	RXRB	0.240381989057839	0
23241	PACS2	0.240377441693915	1
3776	KCNK2	0.240359930942005	0
359845	FAM101B	0.240264238356092	0
92126	DSEL	0.240217890990288	0
64282	PAPD5	0.240165688967367	1
2222	FDFT1	0.240119403810343	0
257019	FRMD3	0.240100384145255	0
3949	LDLR	0.240060369463523	0
9846	GAB2	0.240050308300976	0
8408	ULK1	0.240046086397215	0
9265	CYTH3	0.239932137575647	0
9828	ARHGEF17	0.239773956160452	0
5524	PPP2R4	0.239726825665878	0
6000	RGS7	0.239692313011981	0
57616	TSHZ3	0.239670876299688	0
1871	E2F3	0.239576654039261	0
7857	SCG2	0.239535668485247	0
23648	SSBP3	0.239531952282653	0
84893	FBXO18	0.23948763198127	0
339761	CYP27C1	0.239449881434736	0
6455	SH3GL1	0.239447523738065	0
23461	ABCA5	0.239442845233247	0
11273	ATXN2L	0.239401293015785	1
9811	CTIF	0.239351260234402	0
4504	MT3	0.239301008209263	0
25930	PTPN23	0.239289767688114	0
23365	ARHGEF12	0.239230319923343	0
9486	CHST10	0.239137964071938	0
116225	ZMYND19	0.239095345997221	0
58528	RRAGD	0.239078901914471	0
23505	TMEM131	0.239037909356836	0
23363	OBSL1	0.239031998474992	1
57546	PDP2	0.239002723581437	0
114794	ELFN2	0.238990688050595	0
389	RHOC	0.238967337036604	0
26052	DNM3	0.2389666052331	0
84629	TNRC18	0.238952149901012	0
119	ADD2	0.238942119955912	0
4293	MAP3K9	0.238916562893351	0
81490	PTDSS2	0.238864085978219	0
84867	PTPN5	0.238796408197878	0
1025	CDK9	0.238746592829488	0
23207	PLEKHM2	0.238733060920254	0
79187	FSD1	0.238730007539061	0
51201	ZDHHC2	0.238709651237951	0
57496	MKL2	0.238700043964045	0
84289	ING5	0.238689293458814	0
23508	TTC9	0.23863984238811	0
57451	TENM2	0.238536552109128	0
9706	ULK2	0.238434321182767	0
351	APP	0.238423832240753	0
4923	NTSR1	0.238355523871173	0
6653	SORL1	0.238324070186073	0
4150	MAZ	0.238300984652297	0
6309	SC5D	0.238285370174357	0
11078	TRIOBP	0.238275466852447	0
59345	GNB4	0.238266558523044	0
2259	FGF14	0.238247881278373	0
5575	PRKAR1B	0.238201945727039	0
283212	KLHL35	0.238183740302472	0
57604	KIAA1456	0.238161290714665	1
22999	RIMS1	0.238147757359744	0
644128	RPL23AP53	0.238143082430588	0
4123	MAN2C1	0.238118790481691	0
57419	SLC24A3	0.238113352960539	0
7533	YWHAH	0.238030878338556	0
2648	KAT2A	0.238017839797277	0
114804	RNF157	0.237967779039397	0
63893	UBE2O	0.237955708935019	0
790	CAD	0.237934517576788	0
6187	RPS2	0.237931165801483	0
64766	S100PBP	0.237916099233587	0
9693	RAPGEF2	0.237852987787071	0
51719	CAB39	0.237848158613945	0
26152	ZNF337	0.237777053433055	0
23043	TNIK	0.237768721730833	0
7082	TJP1	0.237729052538397	0
9578	CDC42BPB	0.237708364640321	0
129049	SGSM1	0.2376902001807	0
22983	MAST1	0.237674924008032	1
6339	SCNN1D	0.237635855809176	0
11180	WDR6	0.237625359063247	0
53616	ADAM22	0.237618768496982	0
56888	KCMF1	0.237607568484353	0
25791	NGEF	0.237535104797435	0
730094	C16orf52	0.237458963808633	0
9901	SRGAP3	0.23744688279591	0
207	AKT1	0.237421733608525	0
79948	LPPR3	0.237414509599067	0
9715	FAM131B	0.237390379749222	0
949	SCARB1	0.237382219903265	0
5911	RAP2A	0.237322840038941	0
3488	IGFBP5	0.237277355263629	0
23331	TTC28	0.237269551066284	0
23373	CRTC1	0.237256882642488	0
388610	TRNP1	0.237251346104509	0
208	AKT2	0.237236208290028	0
64943	NT5DC2	0.237235667039057	0
55466	DNAJA4	0.237217692825121	0
158358	KIAA2026	0.237186834961204	0
155060	LOC155060	0.23697938233194	0
23317	DNAJC13	0.236950748651965	0
3727	JUND	0.2369091006143	0
11188	NISCH	0.236896636078578	0
56917	MEIS3	0.236857587822362	0
57449	PLEKHG5	0.236802516076732	0
10527	IPO7	0.236756044511514	0
253959	RALGAPA1	0.236632227963971	1
54329	GPR85	0.236618783225064	0
5252	PHF1	0.236581260226917	0
254122	SNX32	0.236577692779071	0
22841	RAB11FIP2	0.236569223412766	0
79827	CLMP	0.236559462810958	0
23270	TSPYL4	0.236545956296164	0
482	ATP1B2	0.236533828808839	0
27245	AHDC1	0.236486277148408	0
8425	LTBP4	0.236436296836966	0
4858	NOVA2	0.236377918529774	0
647979	LINC00657	0.236359465158582	0
1002	CDH4	0.236320257685427	0
5522	PPP2R2C	0.236281180239695	0
7804	LRP8	0.236259981308256	0
23392	KIAA0368	0.236182953105112	0
154661	RUNDC3B	0.236130243707844	0
2011	MARK2	0.236120276860211	0
51148	CERCAM	0.236065357942303	0
7532	YWHAG	0.236000460792847	1
1949	EFNB3	0.2359949784421	0
3321	IGSF3	0.235947737576884	0
5116	PCNT	0.235896399815067	0
60677	CELF6	0.235871030449015	0
121512	FGD4	0.2358359614118	0
8506	CNTNAP1	0.235806022234187	0
9761	MLEC	0.235748205924683	0
646113	LINC00643	0.235661932664673	0
4140	MARK3	0.235630779736785	0
376497	SLC27A1	0.23554709623198	0
54989	ZNF770	0.23552027810955	0
57666	FBRSL1	0.235475773275119	0
9781	RNF144A	0.235457475783413	0
22893	BAHD1	0.235419364007772	0
8718	TNFRSF25	0.235337973701919	0
23151	GRAMD4	0.235331346916202	0
112755	STX1B	0.235299516844956	0
255403	ZNF718	0.235237397300251	0
54886	LPPR1	0.235231365830217	0
2596	GAP43	0.235206097005208	0
23046	KIF21B	0.235167603445703	0
5569	PKIA	0.235138872540968	0
410	ARSA	0.23511340487343	1
54583	EGLN1	0.235109537679682	0
5567	PRKACB	0.235090794061207	0
65998	C11orf95	0.2350678165482	0
6621	SNAPC4	0.235009650094365	0
11132	CAPN10	0.2349936136522	0
2917	GRM7	0.234958975638594	0
79751	SLC25A22	0.234941509542822	0
10479	SLC9A6	0.234925525987732	0
10188	TNK2	0.234867449702567	0
11215	AKAP11	0.234856935326317	0
4302	MLLT6	0.23485229549052	0
55160	ARHGEF10L	0.234830140748144	0
5521	PPP2R2B	0.234757908383989	0
9112	MTA1	0.234735365901251	0
4139	MARK1	0.234710760182478	0
79447	PAGR1	0.234678058478803	0
9911	TMCC2	0.234640064872417	0
57140	RNPEPL1	0.234604440049342	0
27253	PCDH17	0.234585170366541	0
126792	B3GALT6	0.234581532239478	0
10228	STX6	0.234540124863396	0
55691	FRMD4A	0.234516670561633	1
1008	CDH10	0.234472979738113	0
56655	POLE4	0.234415234336968	0
23214	XPO6	0.234217047242377	0
7324	UBE2E1	0.234205791883305	0
9612	NCOR2	0.234204375899604	1
10908	PNPLA6	0.234180208122851	0
342865	VSTM2B	0.234142855538852	0
128866	CHMP4B	0.234122672588578	0
4335	MNT	0.234120158704787	0
55679	LIMS2	0.234096821049221	0
10046	MAMLD1	0.234018680069298	0
57688	ZSWIM6	0.233964298611333	0
26469	PTPN18	0.233953744549279	0
9091	PIGQ	0.23393441659112	0
6300	MAPK12	0.233924114234106	0
1059	CENPB	0.233865051892939	0
2821	GPI	0.233808443545829	0
23329	TBC1D30	0.233801442522285	0
9778	KIAA0232	0.23378225021668	0
9644	SH3PXD2A	0.233781008248853	0
10808	HSPH1	0.233743406955544	0
29924	EPN1	0.233721147852167	0
10127	ZNF263	0.23369530438237	0
79587	CARS2	0.233691561601886	1
80028	FBXL18	0.23366783655063	0
23446	SLC44A1	0.233662478390847	0
83858	ATAD3B	0.233570133828634	0
5511	PPP1R8	0.233508637416012	0
84678	KDM2B	0.233481846218076	0
54674	LRRN3	0.233468571818641	0
2783	GNB2	0.233461091477807	0
8707	B3GALT2	0.233426161136348	0
51375	SNX7	0.233408303708534	0
23576	DDAH1	0.233390829711505	0
57476	GRAMD1B	0.233345116799577	0
152789	JAKMIP1	0.23333771612881	0
317781	DDX51	0.233299682518801	0
997	CDC34	0.233270146010737	0
477	ATP1A2	0.233211736339715	0
4122	MAN2A2	0.233203168501116	1
5502	PPP1R1A	0.233136666814951	0
127262	TPRG1L	0.233047650721265	0
22866	CNKSR2	0.232963873836662	0
6483	ST3GAL2	0.232912791752607	0
3742	KCNA6	0.232811365299465	0
170463	SSBP4	0.23272468420881	0
100288152	LOC100288152	0.232671308028028	0
9159	PCSK7	0.232569164899594	0
1717	DHCR7	0.232560851077283	0
283876	LINC00921	0.232549740264201	0
51454	GULP1	0.232544406076855	0
26039	SS18L1	0.23253731475604	0
170954	PPP1R18	0.232499814856866	0
23302	WSCD1	0.232461473168073	0
29944	PNMA3	0.232436412332826	0
1952	CELSR2	0.232402268626171	0
57470	LRRC47	0.232379289997441	0
283742	FAM98B	0.232338843922501	0
79683	ZDHHC14	0.232333659802545	0
115703	ARHGAP33	0.232215217220941	0
10580	SORBS1	0.2322084197202	0
23466	CBX6	0.232189027008074	0
84056	KATNAL1	0.232176167770857	0
80339	PNPLA3	0.232150293018105	0
164832	LONRF2	0.232093019958506	0
284996	RNF149	0.232031698604238	0
60412	EXOC4	0.231974550984506	0
10424	PGRMC2	0.231966054066216	0
80315	CPEB4	0.231921284931361	0
57555	NLGN2	0.231912248398239	1
23352	UBR4	0.231883103378232	0
100131017	ZNF316	0.231752549766465	0
57478	USP31	0.231655312149102	0
80728	ARHGAP39	0.231650923466983	0
79709	COLGALT1	0.231504419638929	0
57611	ISLR2	0.231453094102876	0
81786	TRIM7	0.231445207007742	0
56895	AGPAT4	0.231239297477986	0
7732	RNF112	0.231229355880717	0
140700	SAMD10	0.231225457237215	0
126298	IRGQ	0.231192802969641	0
2776	GNAQ	0.231137588984231	0
100125288	ZGLP1	0.231133656937366	0
11173	ADAMTS7	0.231062132951508	0
65268	WNK2	0.231038665348319	0
6710	SPTB	0.23102514365312	0
112	ADCY6	0.231013544676958	0
27148	STK36	0.230957191350462	1
3899	AFF3	0.230920389362478	0
83637	ZMIZ2	0.230908915752304	0
57565	KLHL14	0.230857536436019	0
57506	MAVS	0.230812721720945	0
271	AMPD2	0.230753282889008	0
2868	GRK4	0.23075242121329	0
79992	AGPAT4-IT1	0.23072543231527	0
257407	C2orf72	0.230655537370399	0
2487	FRZB	0.230635839905528	0
93622	LOC93622	0.230611930147667	0
9497	SLC4A7	0.230566763428732	0
3267	AGFG1	0.230541915691624	0
4324	MMP15	0.23049282712578	0
285600	KIAA0825	0.230481571121672	0
7249	TSC2	0.230480493788193	0
1955	MEGF9	0.230437086066578	0
6416	MAP2K4	0.230398862559701	0
3068	HDGF	0.230285858805737	0
10718	NRG3	0.230267305329332	0
9456	HOMER1	0.23021674283403	0
57634	EP400	0.230215879745389	0
3751	KCND2	0.23019270470201	0
100507057	MFI2-AS1	0.230172760367856	0
5209	PFKFB3	0.230152558689963	0
3485	IGFBP2	0.230131365553395	0
114881	OSBPL7	0.230117903293769	1
56896	DPYSL5	0.230114652935278	0
6506	SLC1A2	0.230055747612683	1
1827	RCAN1	0.23004740925784	0
3954	LETM1	0.230034953310279	1
8455	ATRN	0.23002549035376	0
3797	KIF3C	0.230024184862936	0
51696	HECA	0.229988277973775	0
84148	KAT8	0.229972641540976	0
65981	CAPRIN2	0.229966113760943	0
79058	ASPSCR1	0.229882919738947	0
10446	LRRN2	0.229876976543215	0
8451	CUL4A	0.229867557933603	0
56970	ATXN7L3	0.229832284948509	0
30000	TNPO2	0.229777757331271	0
79778	MICALL2	0.229765626236635	0
124925	SEZ6	0.229760229018085	0
23245	ASTN2	0.229662023080225	0
353511	PKD1P6	0.229604938935829	0
150465	TTL	0.229602682494624	0
4072	EPCAM	0.229599082871377	0
23612	PHLDA3	0.229559073996859	0
23035	PHLPP2	0.229557927017958	0
101927257	LOC101927257	0.229516741888955	0
10444	ZER1	0.229509957867823	0
149111	CNIH3	0.229479773591695	0
11083	DIDO1	0.229433867139815	0
9711	KIAA0226	0.22939718438657	0
55075	UACA	0.229361866368669	0
387509	GPR153	0.229311423472389	0
8085	KMT2D	0.229292322475882	1
51343	FZR1	0.229267982043045	1
284677	C1orf204	0.229266360484	0
168455	CCDC71L	0.229265359624168	0
126868	MAB21L3	0.229240974979246	0
55573	CDV3	0.229230911482564	0
64118	DUS1L	0.229227349199356	0
10771	ZMYND11	0.229179108996634	0
57680	CHD8	0.229174706005005	0
90668	LRRC16B	0.22915999150042	0
339123	JMJD8	0.229146006119206	0
3780	KCNN1	0.229120923411689	0
64423	INF2	0.229088905031129	0
10608	MXD4	0.229085849384976	0
5516	PPP2CB	0.229066512577948	0
85442	KNDC1	0.229025219739661	0
54207	KCNK10	0.229025049295693	0
3049	HBQ1	0.229017651537065	0
9962	SLC23A2	0.228997026462388	0
6853	SYN1	0.228940791264856	0
10807	SDCCAG3	0.228902736221123	0
80816	ASXL3	0.228900285458933	0
6855	SYP	0.228894512795827	0
64853	AIDA	0.228882268865842	0
84624	FNDC1	0.228846924616519	0
79641	ROGDI	0.228742100863322	0
123096	SLC25A29	0.228715378182698	0
10943	MSL3	0.228698767475762	0
2257	FGF12	0.228698237452069	1
3096	HIVEP1	0.22868796540962	0
2054	STX2	0.228572911178297	0
5909	RAP1GAP	0.228562735133756	0
100506548	LOC100506548	0.228547611852285	0
163131	ZNF780B	0.228538705877911	0
256714	MAP7D2	0.228486851470289	0
23170	TTLL12	0.228442104415957	0
22838	RNF44	0.228373842125749	0
23271	CAMSAP2	0.22831189794863	0
4774	NFIA	0.228298464893176	0
127281	FAM213B	0.228282851601158	0
10518	CIB2	0.228270061194592	0
112476	PRRT2	0.228255657829988	0
161742	SPRED1	0.228174491786197	0
146760	RTN4RL1	0.228153621138529	0
23053	ZSWIM8	0.228152444852694	0
25875	LETMD1	0.228147802192916	0
56924	PAK6	0.228044070275432	0
80727	TTYH3	0.228021695398849	0
54841	BIVM	0.227902578747696	0
1729	DIAPH1	0.227862544430477	0
10498	CARM1	0.227844984349509	0
26000	TBC1D10B	0.227836662881779	0
9361	LONP1	0.227828082274144	0
11343	MGLL	0.227825313473033	0
140733	MACROD2	0.227797526882897	0
27020	NPTN	0.227746599338218	0
11189	CELF3	0.227744055224402	0
9727	RAB11FIP3	0.227667747597063	0
57142	RTN4	0.22766302253649	0
22870	PPP6R1	0.227628965553163	0
55607	PPP1R9A	0.227606217114479	0
5287	PIK3C2B	0.227563602102601	0
114879	OSBPL5	0.227446118797176	1
9748	SLK	0.227330574637838	0
9909	DENND4B	0.227326014536112	0
23181	DIP2A	0.227289068462487	0
284702	HNRNPU-AS1	0.227272684544375	0
222537	HS3ST5	0.227267719912553	0
4782	NFIC	0.227233649029898	0
10079	ATP9A	0.227227349185086	0
388135	C15orf59	0.22722710308154	0
104	ADARB1	0.227218643333093	0
5991	RFX3	0.227165350768288	1
23101	MCF2L2	0.227095344833139	0
56776	FMN2	0.227049745758316	0
875	CBS	0.227037879487178	0
124739	USP43	0.227009673008397	0
4644	MYO5A	0.22699515589227	0
2820	GPD2	0.226983969300604	0
63027	SLC22A23	0.226972108058378	0
23179	RGL1	0.2269504815214	0
3916	LAMP1	0.226935359913695	0
54842	MFSD6	0.226927532193329	0
23621	BACE1	0.226913428645049	0
222183	SRRM3	0.226862746320254	0
63827	BCAN	0.22685103133164	0
6809	STX3	0.226772985971888	0
6509	SLC1A4	0.226709267118461	0
51232	CRIM1	0.226708633394072	0
92999	ZBTB47	0.226657981218192	0
11154	AP4S1	0.226622206644671	0
10409	BASP1	0.226620511149321	1
3182	HNRNPAB	0.226589744047256	0
84630	TTBK1	0.226461324648958	0
10652	YKT6	0.226415712857729	0
23201	FAM168A	0.22641147442575	0
50861	STMN3	0.226411031710015	0
114819	CROCCP3	0.226396384019303	0
1690	COCH	0.226392315478125	0
27131	SNX5	0.226386701375933	0
26011	TENM4	0.22632964366016	0
6751	SSTR1	0.226316853188839	0
55224	ETNK2	0.226297332546363	0
84498	FAM120B	0.22629381777606	0
55743	CHFR	0.226234705890073	0
9362	CPNE6	0.2261649172654	0
60468	BACH2	0.226152677027991	0
81846	SBF2	0.226140693286722	0
8499	PPFIA2	0.22611652515878	0
51117	COQ4	0.225972743250399	0
57690	TNRC6C	0.225932978387441	0
6900	CNTN2	0.225932301111315	0
8497	PPFIA4	0.22587866953288	0
10147	SUGP2	0.225875618245341	0
55285	RBM41	0.225769290173011	0
221092	HNRNPUL2	0.22565392769138	0
79734	KCTD17	0.225653454365568	0
133746	JMY	0.225651870135001	0
171023	ASXL1	0.225635890008506	1
7086	TKT	0.225607292940983	0
7024	TFCP2	0.225575324225198	0
3638	INSIG1	0.22556301113894	0
192683	SCAMP5	0.225556777440972	0
253461	ZBTB38	0.225515083520477	0
7090	TLE3	0.225507309055344	0
8997	KALRN	0.225487195837575	0
321	APBA2	0.225428081293031	0
65982	ZSCAN18	0.225393796332706	0
10929	SRSF8	0.225360870186113	0
23150	FRMD4B	0.225355149105423	0
5154	PDGFA	0.22531452619972	0
9772	KIAA0195	0.22529220048477	0
27351	DESI1	0.225272757116622	0
23504	RIMBP2	0.22520663344487	0
84331	FAM195A	0.225177904335825	0
79739	TTLL7	0.225174073117124	0
56889	TM9SF3	0.225165727364157	0
118881	COMTD1	0.225161604742719	0
6405	SEMA3F	0.225137599121948	0
375133	PI4KAP2	0.225090022305717	0
57863	CADM3	0.225089802440445	0
1384	CRAT	0.225080940558006	0
6397	SEC14L1	0.225033549078147	0
27158	NDOR1	0.224982617037753	0
79095	C9orf16	0.224962343220039	0
1453	CSNK1D	0.224917139667493	0
3156	HMGCR	0.224916564370219	0
92154	MTSS1L	0.224899159394194	0
8314	BAP1	0.224885073553298	0
83937	RASSF4	0.224873095283022	0
9986	RCE1	0.224856094156848	0
23406	COTL1	0.224812922846241	0
6687	SPG7	0.224802398835794	1
7064	THOP1	0.224790349418595	0
23066	CAND2	0.224783000916899	0
8470	SORBS2	0.224775947918465	0
10787	NCKAP1	0.224751638184555	0
134429	STARD4	0.224731889554777	0
387254	SLC7A5P2	0.224724342379667	0
56172	ANKH	0.224723141553615	0
10059	DNM1L	0.224700425663759	0
867	CBL	0.224682208538265	0
9615	GDA	0.224678046866334	0
54985	HCFC1R1	0.224639663913632	0
254102	EHBP1L1	0.224628843548192	0
51621	KLF13	0.224626584179425	0
2204	FCAR	0.224584660542658	0
7593	MZF1	0.22456427110121	0
574029	DUSP5P1	0.224540022187082	0
5134	PDCD2	0.224536428339308	0
138311	FAM69B	0.22448055567473	0
29116	MYLIP	0.22447215574233	0
2909	ARHGAP35	0.22440500344348	0
4294	MAP3K10	0.224392689129344	0
398	ARHGDIG	0.224387324997667	0
9703	KIAA0100	0.224373645043146	0
54620	FBXL19	0.224315129552999	0
1398	CRK	0.22430414415957	0
347862	PDDC1	0.224288014955175	0
134121	C5orf49	0.22417779477038	0
2548	GAA	0.224163825267424	0
25927	CNRIP1	0.224159872775058	0
2137	EXTL3	0.22415145289821	0
154881	KCTD7	0.224119659303177	0
23420	NOMO1	0.224106936473536	0
255031	LINC00957	0.224082662420862	0
1185	CLCN6	0.224027183389552	0
56252	YLPM1	0.223987545861556	0
55163	PNPO	0.223948961085424	0
442213	PTCHD4	0.223938739022647	0
728392	LOC728392	0.223902271182105	0
108	ADCY2	0.223898187558565	0
10644	IGF2BP2	0.223857376082018	0
221421	RSPH9	0.223808293270741	0
285755	PPIL6	0.223741992343808	0
205	AK4	0.223729910806321	0
738	VPS51	0.223682780231066	0
83394	PITPNM3	0.223661061853426	0
23623	RUSC1	0.223649036693699	0
26146	TRAF3IP1	0.223647251872981	1
54461	FBXW5	0.223640871071032	0
54756	IL17RD	0.223569447811091	0
51380	CSAD	0.22356424284875	0
375341	C3orf62	0.223539396071124	0
399664	MEX3D	0.223493115250113	0
64788	LMF1	0.223428225173571	0
29998	GLTSCR1	0.223407673742784	0
161	AP2A2	0.223358962893593	0
10011	SRA1	0.2233514622467	0
5429	POLH	0.223344319696722	0
490	ATP2B1	0.223317923507445	0
59338	PLEKHA1	0.223291353125879	0
57188	ADAMTSL3	0.223278055560575	0
374887	YJEFN3	0.223253844302066	0
115361	GBP4	0.223160230207859	0
3749	KCNC4	0.223105661181026	0
55614	KIF16B	0.223103556861839	0
140710	SOGA1	0.223090132470679	0
8573	CASK	0.223083436490479	0
9475	ROCK2	0.223078781986486	0
2782	GNB1	0.223044072872417	0
10396	ATP8A1	0.223041857017094	0
284443	ZNF493	0.223037339807207	0
729956	SHISA7	0.222994337283512	0
256643	CXorf23	0.22297324554873	0
79585	CORO7	0.222915632136856	0
1212	CLTB	0.222893311640843	0
352954	GATS	0.222852927976184	0
1004	CDH6	0.222848097517463	0
3843	IPO5	0.222832492262781	0
8515	ITGA10	0.222716195418382	0
51177	PLEKHO1	0.222653121572628	0
7442	TRPV1	0.222642322355849	0
100996635	LOC100996635	0.222637447994488	0
254048	UBN2	0.222514519868459	0
153090	DAB2IP	0.222488025654568	0
387882	C12orf75	0.222486528064994	0
130074	FAM168B	0.222467249421952	0
91039	DPP9	0.222423870263352	0
80031	SEMA6D	0.222421848377319	0
9110	MTMR4	0.222419164747948	0
23002	DAAM1	0.222393300724967	0
7200	TRH	0.222345056870798	0
613	BCR	0.222336312597341	1
5798	PTPRN	0.222326551396915	0
51195	RAPGEFL1	0.222285555844409	0
618	BCYRN1	0.222235875024151	0
201595	STT3B	0.222231205473581	0
23149	FCHO1	0.222225731540628	0
3842	TNPO1	0.222203912135639	0
25789	TMEM59L	0.222201549708566	0
53944	CSNK1G1	0.222178444630076	0
100652929	HP09025	0.222163406861155	0
54965	PIGX	0.222155704386465	0
503542	SPRN	0.222140338029452	0
8906	AP1G2	0.222115777728546	0
51366	UBR5	0.222112415250943	0
56934	CA10	0.222097348745438	0
135112	NCOA7	0.222091618558032	0
23125	CAMTA2	0.222084212059351	0
10985	GCN1L1	0.222077677378004	0
25829	TMEM184B	0.222074427956375	0
23426	GRIP1	0.222048234740754	0
84650	EBPL	0.22203553824163	0
7187	TRAF3	0.221962543442429	0
29997	GLTSCR2	0.221955124492454	0
84256	FLYWCH1	0.221894420477157	0
5099	PCDH7	0.22187762781557	0
11253	MAN1B1	0.221852661112326	0
55615	PRR5	0.221850175146134	0
7046	TGFBR1	0.221841209820431	0
92822	ZNF276	0.221840805434762	0
2055	CLN8	0.221832269128166	0
5930	RBBP6	0.221827181185243	0
8975	USP13	0.221822874825803	0
114900	C1QTNF4	0.221788989699909	0
56479	KCNQ5	0.221774083686816	0
51592	TRIM33	0.22175778974419	0
29	ABR	0.221753602113118	1
4641	MYO1C	0.221743523162367	0
26994	RNF11	0.221737685137522	0
10565	ARFGEF1	0.22173516297019	0
84250	ANKRD32	0.221695552034611	0
3208	HPCA	0.221657392985543	0
203062	TSNARE1	0.221632676899321	0
441212	RP9P	0.221627317470053	0
10124	ARL4A	0.221614600516009	0
10984	KCNQ1OT1	0.221594855473048	0
79269	DCAF10	0.221567697539751	0
100507421	TMEM178B	0.221530523940022	0
91978	TPGS1	0.221502901542938	0
4054	LTBP3	0.221441864655643	0
79573	TTC13	0.22142648097317	0
80267	EDEM3	0.221418891092373	0
8120	AP3B2	0.221395062695708	0
8913	CACNA1G	0.221390662718543	0
84074	QRICH2	0.221386259555578	0
547	KIF1A	0.221384329473455	0
54858	PGPEP1	0.221381961627535	0
54549	SDK2	0.221362328817765	0
3953	LEPR	0.221317682400518	0
10297	APC2	0.221316829563322	0
388662	SLC6A17	0.221288273087364	0
4913	NTHL1	0.221264729567926	0
8073	PTP4A2	0.221236202712498	0
961	CD47	0.221218190786041	0
9228	DLGAP2	0.221209166179149	0
22930	RAB3GAP1	0.221199756545956	0
50807	ASAP1	0.221193200027054	0
5412	UBL3	0.221186367598399	0
129642	MBOAT2	0.221173106389606	0
7916	PRRC2A	0.221124674417841	0
1953	MEGF6	0.221091732317297	0
4248	MGAT3	0.221063738887313	0
10090	UST	0.221048092281242	0
65220	NADK	0.221044102927729	0
7273	TTN	0.221034361080485	0
8301	PICALM	0.2210297212178	0
8829	NRP1	0.221020567044757	0
9637	FEZ2	0.221004281735013	0
7067	THRA	0.220989439854469	0
284207	METRNL	0.220978881672702	0
9498	SLC4A8	0.220972374697043	0
27175	TUBG2	0.220948509461514	0
129880	BBS5	0.220932705155631	0
81618	ITM2C	0.220925795441788	0
64847	SPATA20	0.220896916373848	0
5900	RALGDS	0.220884925251337	0
64319	FBRS	0.220846020553152	0
25827	FBXL2	0.220810446348505	0
5581	PRKCE	0.220756918886021	0
5585	PKN1	0.220735301667045	0
56913	C1GALT1	0.220681975978617	0
8881	CDC16	0.220673535775398	0
10014	HDAC5	0.220664534251689	0
9284	NPIPA1	0.220661576000224	0
57130	ATP13A1	0.220660533899612	0
23443	SLC35A3	0.220653017054179	0
83641	FAM107B	0.220631760371448	0
8805	TRIM24	0.22062880035932	0
51105	PHF20L1	0.220577322495574	0
116328	C8orf34	0.220568312946861	0
6456	SH3GL2	0.22051518657109	0
7328	UBE2H	0.220512262982216	0
23787	MTCH1	0.220504187266819	0
51162	EGFL7	0.220503975338703	0
26207	PITPNC1	0.220470046873991	0
955	ENTPD6	0.220461346519431	0
8440	NCK2	0.220445798733407	0
2310	FOXO3B	0.220437948791971	0
10763	NES	0.220407313806849	0
4891	SLC11A2	0.220356838399339	0
23545	ATP6V0A2	0.220342006699528	0
84302	TMEM246	0.220340329034612	0
7776	ZNF236	0.220303527749225	0
57622	LRFN1	0.220301728999432	0
55885	LMO3	0.220255188206424	0
9057	SLC7A6	0.220222815071862	0
55220	KLHDC8A	0.220181712798602	0
112936	VPS26B	0.220174959454715	0
100505881	MAGI2-AS3	0.22016998290076	0
5800	PTPRO	0.220167866944983	1
79654	HECTD3	0.220145899579306	0
57448	BIRC6	0.220121132031033	0
9858	PPP1R26	0.220111430316756	0
23659	PLA2G15	0.220090566880541	0
100463486	MTRNR2L8	0.220060630681492	0
29801	ZDHHC8	0.220050613628731	0
56998	CTNNBIP1	0.220043922558102	0
51439	FAM8A1	0.220031444219057	0
84132	USP42	0.220017582472737	0
284565	NBPF15	0.219967106581195	0
23513	SCRIB	0.219908928701326	0
51761	ATP8A2	0.219874549916019	0
152559	PAQR3	0.219868236777584	0
22864	R3HDM2	0.219824961122906	0
9699	RIMS2	0.219809373665448	0
83999	KREMEN1	0.219804360037666	0
51308	REEP2	0.219792806974575	0
57582	KCNT1	0.219783873538991	2+
801	CALM1	0.21978175517177	0
8570	KHSRP	0.219735244302917	0
439921	MXRA7	0.219727903943103	0
5803	PTPRZ1	0.219722526939201	0
55312	RFK	0.219717903398778	0
55790	CSGALNACT1	0.21966972988104	0
23366	KIAA0895	0.219668356253728	0
3964	LGALS8	0.219659377620557	0
55585	UBE2Q1	0.219635093329528	0
23368	PPP1R13B	0.219610646413951	0
165	AEBP1	0.219602728894948	0
339451	KLHL17	0.219505626309761	0
11325	DDX42	0.219501526921439	0
79966	SCD5	0.219486656169534	0
10178	TENM1	0.219486272872759	0
23285	KIAA1107	0.219476437451166	0
23173	METAP1	0.219421943197528	0
54910	SEMA4C	0.219401486449979	0
57180	ACTR3B	0.219394681893837	0
10231	RCAN2	0.219303346396769	0
10217	CTDSPL	0.219283838634167	0
3800	KIF5C	0.219272859771338	0
339287	MSL1	0.219272379301209	0
9956	HS3ST2	0.219241151395382	0
10979	FERMT2	0.219224210530714	0
81552	VOPP1	0.219210177816	0
8476	CDC42BPA	0.219182571913221	0
342945	ZSCAN22	0.219140484634754	0
9211	LGI1	0.219137508716264	0
81563	C1orf21	0.219115152627328	0
6535	SLC6A8	0.219024837356212	0
8558	CDK10	0.219022652152215	0
114786	XKR4	0.218918607817247	0
23309	SIN3B	0.218903482848379	0
109	ADCY3	0.21883788483437	0
157378	TMEM65	0.218802431503814	0
23774	BRD1	0.218794591893174	0
126282	TNFAIP8L1	0.218791938511343	0
65010	SLC26A6	0.218773363635554	0
6433	SFSWAP	0.218761559164735	0
57537	SORCS2	0.21874214451475	0
10905	MAN1A2	0.218732513863614	1
1159	CKMT1B	0.218719274709723	0
202018	TAPT1	0.218696993135344	0
7464	CORO2A	0.218662215066387	0
63917	GALNT11	0.218655463891262	0
143282	FGFBP3	0.218648472598228	0
90956	ADCK2	0.218632934465026	0
440073	IQSEC3	0.21860831489569	0
54492	NEURL1B	0.218593386456705	0
114915	EPB41L4A-AS1	0.218578321831043	0
92002	FAM58A	0.218556875495142	0
9344	TAOK2	0.218543390546683	0
130507	UBR3	0.218530873966917	0
144402	CPNE8	0.21844187675993	1
221061	FAM171A1	0.218441345093123	0
6576	SLC25A1	0.218425712435001	0
10907	TXNL4A	0.218409685367356	0
730051	ZNF814	0.218395700438693	0
80313	LRRC27	0.218359039956091	0
478	ATP1A3	0.218355435261852	1
375704	ENHO	0.218328929347419	0
79690	GAL3ST4	0.218283399143514	0
2047	EPHB1	0.218281694233323	0
2771	GNAI2	0.218248080101645	0
6709	SPTAN1	0.218129142874386	0
9759	HDAC4	0.218079957055305	0
23164	MPRIP	0.218041340423289	0
222553	SLC35F1	0.218032944904118	0
1431	CS	0.21800017494639	0
81566	CSRNP2	0.217988904478908	0
25817	FAM19A5	0.217982461046668	0
5094	PCBP2	0.217976479199593	0
54958	TMEM160	0.217957247149528	0
23217	ZFR2	0.21795194698374	0
147991	DPY19L3	0.217949377672851	0
64478	CSMD1	0.217914482346621	0
10116	FEM1B	0.217891827060626	0
5335	PLCG1	0.217887126961145	1
149175	MANEAL	0.217878975306582	0
9472	AKAP6	0.217875336642528	1
9590	AKAP12	0.21781792764817	0
9666	DZIP3	0.217734791309049	0
221895	JAZF1	0.217730013167212	0
83638	C11orf68	0.217723587762782	0
818	CAMK2G	0.217716387550804	0
51422	PRKAG2	0.217679598636242	0
4828	NMB	0.217624483698902	0
10678	B3GNT2	0.217603321062583	0
84874	ZNF514	0.217595436722039	0
54972	TMEM132A	0.217592059984301	1
121665	SPPL3	0.217574929391995	0
116987	AGAP1	0.217567233064959	0
64748	LPPR2	0.217522292891365	0
114788	CSMD3	0.217506253346268	0
79699	ZYG11B	0.217490009914452	0
5819	PVRL2	0.217467689780155	0
11264	PXMP4	0.217433128047346	0
4485	MST1	0.217418301143158	0
394	ARHGAP5	0.217396212424915	0
10267	RAMP1	0.217379938963966	0
7410	VAV2	0.217362887706668	0
23476	BRD4	0.21731548483597	0
5138	PDE2A	0.217301423468086	0
90550	MCU	0.217289055015821	0
65124	SOWAHC	0.21727631756896	0
92979	MARCH9	0.217262130234863	0
158471	PRUNE2	0.217182654760055	0
342918	C19orf81	0.217170545450767	0
5190	PEX6	0.217140988098853	0
91526	ANKRD44	0.217112503407157	0
2590	GALNT2	0.217091361466041	0
4124	MAN2A1	0.217067999727781	0
23031	MAST3	0.217022521857969	0
6773	STAT2	0.21700458073281	0
57585	CRAMP1L	0.216932961086466	0
10155	TRIM28	0.216891117713303	0
6541	SLC7A1	0.216868860188096	0
91289	LMF2	0.216839188536683	0
29855	UBN1	0.216836212109085	0
11328	FKBP9	0.21682590588653	0
84319	CMSS1	0.216813312614176	0
83694	RPS6KL1	0.216809105064084	0
30812	SOX8	0.216776070357622	0
221002	RASGEF1A	0.21676379062438	0
10371	SEMA3A	0.216752004898231	0
23506	GLTSCR1L	0.216706866568236	0
192111	PGAM5	0.21670681692483	0
55323	LARP6	0.216684092031637	0
3607	FOXK2	0.216578379235749	0
23060	ZNF609	0.21656815860444	0
5305	PIP4K2A	0.216512910951967	0
2744	GLS	0.216511214391862	0
114134	SLC2A13	0.216485676950634	0
54487	DGCR8	0.216441605947876	0
1183	CLCN4	0.216416350183645	1
9401	RECQL4	0.2163963624915	0
7468	WHSC1	0.216391861495696	0
5912	RAP2B	0.216344936365302	0
83639	TEX101	0.216326965344849	0
6543	SLC8A2	0.216300939582553	0
285464	CRIPAK	0.216278033926208	0
56731	SLC2A4RG	0.216270979876635	0
221184	CPNE2	0.216268380777988	0
344558	SH3RF3	0.2162600666181	0
127687	C1orf122	0.216260065458878	0
5150	PDE7A	0.216244926972207	0
22808	MRAS	0.216233786977656	0
3754	KCNF1	0.216224976246287	0
57502	NLGN4X	0.21621400118622	0
57720	GPR107	0.216196239352889	0
10150	MBNL2	0.216190245556544	0
2983	GUCY1B3	0.216185908836529	0
85465	EPT1	0.216141764958411	0
128989	TANGO2	0.216140064623792	0
56910	STARD7	0.216135607169331	1
55362	TMEM63B	0.21612101947212	0
752	FMNL1	0.216117437912721	0
51286	CEND1	0.216114706379074	0
79703	C11orf80	0.216114550020136	0
10690	FUT9	0.216096105997408	0
55621	TRMT1	0.216085249089659	0
64744	SMAP2	0.216072813074395	0
22985	ACIN1	0.216066739422506	0
79567	FAM65A	0.216040690785342	0
1595	CYP51A1	0.216039564853863	0
9538	EI24	0.216007500566767	0
64854	USP46	0.21594807189361	0
25792	CIZ1	0.215923701306293	0
55966	AJAP1	0.215916856287001	0
93611	FBXO44	0.215916300318657	0
5609	MAP2K7	0.215899483280912	0
4900	NRGN	0.215899114799196	0
1938	EEF2	0.215852873366541	0
9797	TATDN2	0.215807417291501	0
9731	CEP104	0.21578939047137	0
113201	CASC4	0.215788224926038	0
4598	MVK	0.21578594986284	0
84249	PSD2	0.215770139757127	0
51257	MARCH2	0.215716274859322	0
9146	HGS	0.215663290447548	0
6942	TCF20	0.215658615892056	0
23380	SRGAP2	0.215653512506445	0
8491	MAP4K3	0.215632988669576	0
23067	SETD1B	0.215614424729496	0
29799	YPEL1	0.215574146248094	0
22877	MLXIP	0.21556272973958	0
57727	NCOA5	0.215536213320003	0
53339	BTBD1	0.215507793131769	0
977	CD151	0.215489018630052	0
50618	ITSN2	0.215469090086696	0
146227	BEAN1	0.215434117473042	0
85352	KIAA1644	0.215432079854236	0
130872	AHSA2	0.215424307244251	0
5603	MAPK13	0.215400013805956	0
2891	GRIA2	0.2153778502106	0
388	RHOB	0.215357898690289	0
57706	DENND1A	0.215311945888279	0
100462981	MTRNR2L2	0.215256490373628	0
25956	SEC31B	0.215206469858886	0
126129	CPT1C	0.215181431346711	0
5566	PRKACA	0.215173794060138	0
54464	XRN1	0.215166321647118	0
23598	PATZ1	0.215159460070859	0
4897	NRCAM	0.215147241208241	0
9201	DCLK1	0.215101465827289	0
8745	ADAM23	0.215042821099722	0
157922	CAMSAP1	0.215014132724347	0
90525	SHF	0.215004985834486	0
54994	GID8	0.214970564358139	0
160851	DGKH	0.214961737442706	0
8603	FAM193A	0.214943702482475	0
126374	WTIP	0.21492869059801	0
93624	TADA2B	0.214921917881361	0
23218	NBEAL2	0.214887350215391	0
203259	FAM219A	0.214885732279636	0
23387	SIK3	0.214864932335992	0
144233	BCDIN3D	0.214819990865329	0
54928	IMPAD1	0.214815866505805	0
51028	VPS36	0.214814187979982	0
256281	NUDT14	0.214811469388418	0
9907	AP5Z1	0.214797030636646	0
10494	STK25	0.214784247371088	0
84221	SPATC1L	0.214775336597379	0
388585	HES5	0.214757289070925	0
57628	DPP10	0.214719660941478	0
9943	OXSR1	0.214717362791711	0
64062	RBM26	0.214675418091985	0
2048	EPHB2	0.214651403820318	0
221662	RBM24	0.214645154481251	0
29101	SSU72	0.214644119918905	0
30837	SOCS7	0.214622029372457	0
29094	LGALSL	0.214573781058247	0
84856	LINC00839	0.21456895322957	0
51339	DACT1	0.214546618970022	0
27242	TNFRSF21	0.214519683635361	0
145820	LINC00924	0.214484983768104	0
80829	ZFP91	0.214468557673715	0
132864	CPEB2	0.214443326723975	0
55103	RALGPS2	0.214424941515754	0
57060	PCBP4	0.214396692869101	0
7874	USP7	0.214389145830161	0
90861	HN1L	0.214360757926351	0
84140	FAM161A	0.214351926925468	0
8507	ENC1	0.21429314742692	0
7881	KCNAB1	0.214279925853429	0
222161	DKFZP586I1420	0.214268709824831	0
11098	PRSS23	0.214263586109568	0
8660	IRS2	0.214248219183325	0
100463487	MTRNR2L9	0.214225108597605	0
8999	CDKL2	0.214223848953343	0
83642	SELO	0.214212371899123	0
8733	GPAA1	0.214185942346605	0
92597	MOB1B	0.214185806470746	0
79414	LRFN3	0.214159765803825	0
858	CAV2	0.214159411926775	0
3299	HSF4	0.214155265106442	0
65986	ZBTB10	0.214139896465358	0
659	BMPR2	0.214136324563507	0
23654	PLXNB2	0.214128710004348	1
9734	HDAC9	0.214122502774514	0
196385	DNAH10	0.214078730351961	0
9583	ENTPD4	0.214072945137288	0
5325	PLAGL1	0.214062844639007	0
5414	SEPT4	0.214016398395292	0
1113	CHGA	0.21399108926007	0
23196	FAM120A	0.213931230911917	0
11261	CHP1	0.213928395155924	0
170394	PWWP2B	0.213897300133293	0
93556	EGFEM1P	0.213846716293217	0
23051	ZHX3	0.213845634395761	0
2173	FABP7	0.21383423675421	0
25822	DNAJB5	0.213831183916143	0
253782	CERS6	0.213821761189097	0
5891	MOK	0.213789834579423	0
11011	TLK2	0.213788267141933	0
27122	DKK3	0.213770650507938	0
441151	TMEM151B	0.213742641983105	0
4056	LTC4S	0.213719444090945	0
83742	MARVELD1	0.213706367045276	0
113802	HENMT1	0.213704888889129	0
91775	NXPE3	0.213700525461325	0
440465	BAIAP2-AS1	0.213690551297384	0
199731	CADM4	0.2135941869193	0
10949	HNRNPA0	0.213576992068439	0
6609	SMPD1	0.213576700750248	0
256472	TMEM151A	0.213575482705448	0
402483	LINC01000	0.213574631495478	0
65990	FAM173A	0.213567568940091	0
84460	ZMAT1	0.21349806064672	0
9213	XPR1	0.213495200468511	0
775	CACNA1C	0.213480524265267	1
284716	RIMKLA	0.21336166030647	0
50810	HDGFRP3	0.213347674152386	0
79632	FAM184A	0.213328798193644	0
57418	WDR18	0.213295066932023	0
22927	HABP4	0.213265900454854	0
79027	ZNF655	0.21326396620594	0
54926	UBE2R2	0.213258168996839	0
23462	HEY1	0.213252495482078	0
54923	LIME1	0.213241374505927	0
84708	LNX1	0.213235335539111	0
1432	MAPK14	0.213163228479457	0
4548	MTR	0.213077020023133	0
129285	PPP1R21	0.213070082315587	0
57157	PHTF2	0.213049955252863	0
7169	TPM2	0.213003966438328	0
55219	TMEM57	0.21297352901019	0
8884	SLC5A6	0.21297163808364	0
89792	GAL3ST3	0.212926075642042	0
1857	DVL3	0.212899879339248	0
54753	ZNF853	0.212877753249418	0
9929	JOSD1	0.212850845860539	0
1387	CREBBP	0.212846575103424	1
6714	SRC	0.212831696773325	0
101928580	LOC101928580	0.212829169878224	0
170960	ZNF721	0.212796603729929	0
5495	PPM1B	0.21277737549085	0
57118	CAMK1D	0.212765673409555	0
23163	GGA3	0.212748713317799	0
349114	LINC00265	0.212732496991744	0
472	ATM	0.212732235702912	0
146059	CDAN1	0.212704723045229	0
80351	TNKS2	0.212687684372315	0
63933	MCUR1	0.212640985429769	0
23394	ADNP	0.212626812046365	0
55714	TENM3	0.212606870689108	0
26108	PYGO1	0.212569230571292	0
377	ARF3	0.212550487029206	0
9231	DLG5	0.212547503689123	0
10531	PITRM1	0.212529512077712	0
142891	SAMD8	0.212498200309975	0
56897	WRNIP1	0.212477158898605	0
257194	NEGR1	0.212473398427109	0
403341	ZBTB34	0.212427932289728	0
6310	ATXN1	0.212407589214337	0
101928936	LOC101928936	0.212403370729782	0
196527	ANO6	0.212386276247517	0
79726	WDR59	0.212314523505403	0
65123	INTS3	0.212298650629963	0
2675	GFRA2	0.212267783728475	0
23039	XPO7	0.212265149050983	0
10322	SMYD5	0.212259833955012	0
257397	TAB3	0.212232386708126	0
1009	CDH11	0.212227179300817	0
8534	CHST1	0.212202310743302	0
23367	LARP1	0.212195131942166	0
6197	RPS6KA3	0.212192362031121	0
9209	LRRFIP2	0.212169475283318	0
79772	MCTP1	0.212150861911162	0
6830	SUPT6H	0.212149992532667	0
4157	MC1R	0.212092717002648	0
5881	RAC3	0.212089453592951	0
1186	CLCN7	0.212089020790965	0
10277	UBE4B	0.212080984821334	0
80025	PANK2	0.212063603184266	0
23082	PPRC1	0.21206308882005	0
57348	TTYH1	0.212058293480184	0
282974	STK32C	0.212055527733062	0
283149	BCL9L	0.212016883201851	0
100506834	LOC100506834	0.211951942049185	0
132720	C4orf32	0.211949235450814	0
118812	MORN4	0.211923094908786	0
646851	FAM227A	0.211880773285741	1
5789	PTPRD	0.211841675530162	0
26256	CABYR	0.211825796239061	0
56893	UBQLN4	0.211793177086851	0
23324	MAN2B2	0.21175674356478	0
2534	FYN	0.211755656086661	0
221477	C6orf89	0.211713084613649	0
114659	LRRC37B	0.211705835862847	0
23336	SYNM	0.211698845247844	0
3371	TNC	0.21164513994127	0
11060	WWP2	0.211639328545804	0
10098	TSPAN5	0.211572743379537	0
5172	SLC26A4	0.211571689838973	0
2580	GAK	0.211553771312375	0
84162	KIAA1109	0.211459599238866	0
5178	PEG3	0.211456294011142	0
283554	GPR137C	0.211451513747633	0
84623	KIRREL3	0.211419937135427	0
645644	FLJ42627	0.211397834466455	0
7453	WARS	0.211396497563722	0
57624	NYAP2	0.211394269467125	0
9887	SMG7	0.211386519774589	0
4739	NEDD9	0.211376044548841	1
10758	TRAF3IP2	0.211326210615422	0
8214	DGCR6	0.211310072858235	0
11245	GPR176	0.211308055386062	0
89796	NAV1	0.211240835108803	0
255426	RASGEF1C	0.211222825470896	0
50862	RNF141	0.211186777311021	0
55526	DHTKD1	0.211181951204802	1
56478	EIF4ENIF1	0.211180972952943	0
27107	ZBTB11	0.211164769058129	0
64393	ZMAT3	0.211155528174807	0
26091	HERC4	0.211153264494967	0
57613	KIAA1467	0.211148554900414	0
25777	SUN2	0.211092491858096	0
53834	FGFRL1	0.211085809230296	0
55262	C7orf43	0.211077923121191	0
4882	NPR2	0.211025445939134	0
283450	HECTD4	0.211014403755368	0
100190939	TPT1-AS1	0.211010914901342	0
54814	QPCTL	0.210969632673619	0
84552	PARD6G	0.210940040436887	0
374819	LRRC37A3	0.210927364854318	0
5634	PRPS2	0.210910910156862	0
8722	CTSF	0.210872172802906	0
8835	SOCS2	0.210872120323067	0
283209	PGM2L1	0.210871925259881	0
5119	CHMP1A	0.210868571818333	0
55342	STRBP	0.210841477962137	0
54991	C1orf159	0.210806301502448	0
7428	VHL	0.210796621030307	0
57414	RHBDD2	0.210787285479594	0
66036	MTMR9	0.210779767388494	0
9743	ARHGAP32	0.2107772778278	0
10898	CPSF4	0.210775500946053	0
84662	GLIS2	0.210775169733693	0
100128288	LOC100128288	0.210773663361218	0
8303	SNN	0.210730578273722	0
1291	COL6A1	0.210730358716756	0
51166	AADAT	0.210728227806164	0
2932	GSK3B	0.210679385074525	0
79844	ZDHHC11	0.210670391097096	0
140576	S100A16	0.210592192076235	0
4356	MPP3	0.210533498701078	0
56704	JPH1	0.210530040321929	0
114880	OSBPL6	0.210527009312062	0
5348	FXYD1	0.210498704559996	0
84967	LSM10	0.210478333658025	0
160857	CCDC122	0.210471667882997	0
79867	TCTN2	0.210396769159284	0
23433	RHOQ	0.210391788708867	0
25778	DSTYK	0.210361331089684	0
57403	RAB22A	0.210358608998117	0
5364	PLXNB1	0.210353230263303	0
56666	PANX2	0.210347167088472	0
137964	AGPAT6	0.210336550685064	0
387893	SETD8	0.210328625158942	0
8242	KDM5C	0.210296599641859	0
9720	CCDC144A	0.210265737514077	0
85371	KIAA1656	0.210256881606927	0
5795	PTPRJ	0.210187877830542	0
10873	ME3	0.210152882638321	0
155435	RBM33	0.210139873398752	0
54472	TOLLIP	0.210121636452575	0
953	ENTPD1	0.210099293584901	0
2892	GRIA3	0.210098767919497	0
7678	ZNF124	0.210064074403438	0
100129482	ZNF37BP	0.210012581103636	0
4796	TONSL	0.209996638884373	0
6526	SLC5A3	0.209992097447413	0
326625	MMAB	0.209965798680702	0
8824	CES2	0.209964638157677	0
54839	LRRC49	0.209961457202291	0
84461	NEURL4	0.209940606997029	0
114803	MYSM1	0.209929121056469	0
58512	DLGAP3	0.20992270571251	0
8893	EIF2B5	0.209922446684481	0
1463	NCAN	0.209880167962359	0
10715	CERS1	0.20986920374103	0
147179	WIPF2	0.209867486214643	0
79633	FAT4	0.209833265276879	0
7297	TYK2	0.209809850752624	0
25	ABL1	0.209734172924752	0
284656	EPHA10	0.209719940149892	0
55275	VPS53	0.209717456637299	0
57799	RAB40C	0.209687852681677	0
83849	SYT15	0.209674475551282	0
40	ASIC2	0.20964922184159	0
22982	DIP2C	0.209645796516266	1
90678	LRSAM1	0.209592119458546	0
286097	MICU3	0.209576963455709	0
7168	TPM1	0.209566427634985	0
5549	PRELP	0.209540602687766	0
23187	PHLDB1	0.209533661895506	1
7390	UROS	0.209517387680796	0
5906	RAP1A	0.209489985508159	0
55764	IFT122	0.209479448691993	0
10844	TUBGCP2	0.209448186900847	0
286410	ATP11C	0.209440076622314	0
23523	CABIN1	0.209425957883752	0
57168	ASPHD2	0.209399358735115	0
23005	MAPKBP1	0.209390681173143	0
6648	SOD2	0.209390258557624	0
50650	ARHGEF3	0.20938313838166	0
25831	HECTD1	0.209367673051561	0
8682	PEA15	0.209367434023408	0
27154	BRPF3	0.209320585698471	0
57468	SLC12A5	0.209313297933608	0
11158	RABL2B	0.209287829967435	0
1993	ELAVL2	0.209278437928847	0
95681	CEP41	0.209273405872141	0
84726	PRRC2B	0.209272245636407	0
79939	SLC35E1	0.209233705572993	0
55337	C19orf66	0.209231137459661	0
55182	RNF220	0.209187517030555	0
10768	AHCYL1	0.20916092345136	0
221037	JMJD1C	0.209158364768908	0
146880	LOC146880	0.209157367513948	0
4671	NAIP	0.209148123317007	0
55335	NIPSNAP3B	0.209142528779661	0
90809	TMEM55B	0.209133455355895	0
10587	TXNRD2	0.209118356666283	0
56884	FSTL5	0.209111456781309	0
22863	ATG14	0.208999058101225	0
23236	PLCB1	0.208996889833551	0
340481	ZDHHC21	0.208987780007726	0
57456	KIAA1143	0.208959614915392	0
58986	TMEM8A	0.208958194867565	0
642852	LOC642852	0.208944269978881	0
6002	RGS12	0.208935802057901	0
51150	SDF4	0.208931040580522	0
5786	PTPRA	0.208897863105463	0
64149	C17orf75	0.208889847263681	0
124152	IQCK	0.20888478848948	0
1027	CDKN1B	0.208873695340305	0
2801	GOLGA2	0.208858735779675	0
30008	EFEMP2	0.208814695943803	0
80774	LIMD2	0.208802246117237	0
100289678	ZNF783	0.208785104258309	0
4097	MAFG	0.208774761531702	0
79575	ABHD8	0.20877318319535	0
10120	ACTR1B	0.208665944006074	0
5019	OXCT1	0.208662806050881	0
7844	RNF103	0.208656815604648	0
11214	AKAP13	0.208581273431139	0
222950	NYAP1	0.208567410480208	0
389177	TMEM212	0.208555083736126	0
57577	KIAA1407	0.208553408710304	0
387923	SERP2	0.208551705738617	0
65059	RAPH1	0.208533078921084	0
79884	MAP9	0.208526948021871	0
64131	XYLT1	0.208502414871804	0
9758	FRMPD4	0.208470141536897	0
154807	VKORC1L1	0.208407336098212	0
5565	PRKAB2	0.208403283049092	0
11284	PNKP	0.208378444723496	0
59274	MESDC1	0.208376490309921	0
54768	HYDIN	0.208372178181909	0
5563	PRKAA2	0.208362964470173	0
25999	CLIP3	0.208333609706844	0
54537	FAM35A	0.208328762491967	0
221496	LEMD2	0.208324154813231	0
3746	KCNC1	0.208317171707418	0
728927	ZNF736	0.208304125761152	0
79870	BAALC	0.208303198435678	0
85455	DISP2	0.208280398624889	0
23312	DMXL2	0.208253806427546	0
9804	TOMM20	0.208197752528981	0
8270	LAGE3	0.208163447865728	0
4209	MEF2D	0.208152208401301	0
23287	AGTPBP1	0.208151600215526	0
26063	DECR2	0.208139878724736	1
51701	NLK	0.208060222482189	0
55893	ZNF395	0.208033830804799	0
1445	CSK	0.208022599226088	0
1355	COX15	0.208021234703944	0
10724	MGEA5	0.208016000191896	0
8888	MCM3AP	0.20800844859712	0
284184	C17orf89	0.207993713894154	0
80381	CD276	0.207977323675357	0
81832	NETO1	0.207966828407519	0
151963	MB21D2	0.207922461105939	0
2913	GRM3	0.207918999147724	0
7016	TESK1	0.207911924374685	0
2791	GNG11	0.207905435544848	0
125919	ZNF543	0.207900278862874	0
27352	SGSM3	0.207873329359153	0
122553	TRAPPC6B	0.207868157703955	0
55450	CAMK2N1	0.207863915866432	0
2566	GABRG2	0.207852976464943	0
6801	STRN	0.207848626542435	0
5834	PYGB	0.207830028300112	0
80714	PBX4	0.207827285377664	0
84900	RNFT2	0.207820268074202	0
389072	PLEKHM3	0.207790436994717	0
83931	STK40	0.207767987623532	0
10793	ZNF273	0.207744195398295	0
10486	CAP2	0.207729307487143	1
5716	PSMD10	0.207704034363168	0
254863	TMEM256	0.207691568286662	0
586	BCAT1	0.207687376149385	0
347731	LRRTM3	0.207678784964837	0
10439	OLFM1	0.207677333611411	0
57704	GBA2	0.207659153838775	0
8621	CDK13	0.207651005116989	0
57549	IGSF9	0.20764035309174	0
23216	TBC1D1	0.207596582407027	0
55071	C9orf40	0.207589913238704	0
10076	PTPRU	0.207572492055993	0
6650	CAPN15	0.207563800583562	0
54497	HEATR5B	0.207562171415829	0
192670	AGO4	0.207556986489568	0
9875	URB1	0.207530807819063	0
47	ACLY	0.207529612426778	0
5170	PDPK1	0.207499851881344	0
9823	ARMCX2	0.20749118106859	0
125058	TBC1D16	0.207472677716109	0
55852	TEX2	0.207470769353538	0
8662	EIF3B	0.207461222009608	0
56938	ARNTL2	0.207459875623323	0
132160	PPM1M	0.207406342185748	0
56999	ADAMTS9	0.207387380957036	0
5158	PDE6B	0.207372982619507	0
5649	RELN	0.207362218491344	0
3712	IVD	0.207359132558078	0
267	AMFR	0.207357339241024	0
65250	C5orf42	0.207350731934455	0
54675	CRLS1	0.20733930803836	0
[truncated: 8,483 more rows]

## Sheet: Supplemental Table S7C
Supplemental Table S7C. Co-expression network of ASD genes with dnLoF mutations in NPCs.
Gene symbol	Gene symbol
ADAMTS9	KDM3A
ADNP	AMOTL1
ADNP	BRSK2
ADNP	CHD8
ADNP	DVL3
ADNP	ELAVL2
ADNP	GAREM
ADNP	L1CAM
ADNP	NBEA
ADNP	SETD2
ADNP	TNRC18
ADNP	WDFY3
ADSS	KDM4B
AHDC1	ANK2
AHDC1	CELF4
AHDC1	CHD8
AHDC1	CPD
AHDC1	DIP2C
AHDC1	DST
AHDC1	FBXW11
AHDC1	FOXO6
AHDC1	GAREM
AHDC1	GRIA2
AHDC1	HERC1
AHDC1	IGSF3
AHDC1	IQGAP2
AHDC1	IRF2BPL
AHDC1	KIAA0232
AHDC1	L1CAM
AHDC1	MIAT
AHDC1	NFIB
AHDC1	PLXNA3
AHDC1	PTEN
AHDC1	REPIN1
AHDC1	SCN2A
AHDC1	SHANK2
AHDC1	SKI
AHDC1	SPAST
AHDC1	SPTBN1
AHDC1	TANC2
AHDC1	THSD7A
AHDC1	TNRC18
AHDC1	UBR5
AHDC1	UNC79
AHDC1	WDFY3
AHDC1	XRN1
AKAP9	CELF2
AKAP9	CELF4
AKAP9	GRIA2
AKAP9	L1CAM
AKAP9	MIAT
AKAP9	NFIB
AKAP9	ZNF292
AMOTL1	CDC73
AMOTL1	CELF4
AMOTL1	DST
AMOTL1	GABRB3
AMOTL1	GAREM
AMOTL1	GRIA2
AMOTL1	KDM4B
AMOTL1	L1CAM
AMOTL1	MIAT
AMOTL1	MYT1L
AMOTL1	NIN
AMOTL1	NINL
AMOTL1	RUNDC3B
AMOTL1	SCN2A
AMOTL1	SCNN1D
AMOTL1	SHANK2
AMOTL1	SORBS1
AMOTL1	TANC2
AMOTL1	TNRC18
AMOTL1	UNC79
AMOTL1	WDFY3
ANK2	ASXL3
ANK2	BZRAP1
ANK2	C20orf194
ANK2	CC2D1A
ANK2	CDC73
ANK2	CELF2
ANK2	DIP2C
ANK2	DST
ANK2	FAM8A1
ANK2	GABRB3
ANK2	GAREM
ANK2	GPRIN1
ANK2	GRIA2
ANK2	HIVEP3
ANK2	IGSF3
ANK2	INTS1
ANK2	IQGAP2
ANK2	JUP
ANK2	KDM6B
ANK2	L1CAM
ANK2	MGRN1
ANK2	MIAT
ANK2	MTMR12
ANK2	MYT1L
ANK2	NBEA
ANK2	NIN
ANK2	PBX1
ANK2	PHF2
ANK2	PLXNA3
ANK2	PRKAR1B
ANK2	PTEN
ANK2	RIMBP2
ANK2	RNF213
ANK2	RNF38
ANK2	RUNDC3B
ANK2	SCN2A
ANK2	SEMA6A
ANK2	SHANK2
ANK2	SORBS1
ANK2	SPTBN1
ANK2	STMN4
ANK2	STXBP1
ANK2	SUV420H1
ANK2	TANC2
ANK2	TMEM132B
ANK2	TNC
ANK2	UNC79
ANK2	WDFY3
ANK2	XRN1
ANKRD11	CASP8AP2
ANKRD11	CELF4
ANKRD11	EP400
ANKRD11	KIAA0100
ANKRD11	KMT2A
ANKRD11	MIAT
ANKRD11	NINL
ANKRD11	RUNDC1
ANKRD11	SYNGAP1
ANKRD11	ZC3H11A
ANP32A	FAM177A1
ANP32A	KMT2A
ANP32A	NFIB
AP1G2	INADL
AP1G2	KIAA2022
AP4E1	BTRC
AP4E1	FAM8A1
AP4E1	GAREM
AP4E1	KDM4B
AP4E1	KIAA0100
AP4E1	SYNGAP1
AP4E1	TAF4
AP4E1	WNT7B
APH1A	DIP2C
ARHGAP44	SCN2A
ARHGAP5	BZRAP1
ARHGAP5	CELF2
ARHGAP5	CTBP2
ARHGAP5	GRIA2
ARHGAP5	IGSF3
ARHGAP5	MDN1
ARHGAP5	MTMR12
ARHGAP5	TMEM132B
ARHGAP5	TNC
ARID1B	CELF4
ARID1B	CHD8
ARID1B	GRIA2
ARID1B	HEATR5B
ARID1B	KMT2A
ARID1B	KMT2C
ARID1B	L1CAM
ARID1B	MIAT
ARID1B	MYO9B
ARID1B	MYT1L
ARID1B	NFIB
ARID1B	RIMS1
ARID1B	SETD2
ARID1B	TMEM131
ARID1B	TNRC18
ASH1L	TNRC6B
ASXL3	BRSK1
ASXL3	C20orf194
ASXL3	GABRB3
ASXL3	GAREM
ASXL3	GRIA2
ASXL3	IGSF3
ASXL3	MED13
ASXL3	MIAT
ASXL3	MYT1L
ASXL3	NBEA
ASXL3	RUNDC3B
ASXL3	SHANK2
ASXL3	SPRY2
ASXL3	SRGAP2
ASXL3	TANC2
ASXL3	TMEM132B
ASXL3	TNRC18
ASXL3	UNC79
ATP13A3	IGSF3
ATP13A3	KMT2C
ATP13A3	MYT1L
ATP1A1	XPO4
BAZ2B	KIF21A
BCL11A	CELF4
BCL11A	EP300
BCL11A	FOXO6
BCL11A	JARID2
BCL11A	NFIB
BCL11A	TCF3
BCL11A	THSD7A
BCL11A	TPT1
BCLAF1	EZR
BIRC6	CELF2
BIRC6	HERC1
BIRC6	KDM6B
BIRC6	L1CAM
BIRC6	MYT1L
BIRC6	NBEA
BIRC6	SPRY2
BIRC6	STRIP1
BIRC6	TNRC18
BRSK1	BTBD6
BRSK1	CDC73
BRSK1	CHD8
BRSK1	DMWD
BRSK1	FBXW11
BRSK1	IGSF3
BRSK1	IQGAP2
BRSK1	KDM4B
BRSK1	KMT2A
BRSK1	NBEA
BRSK1	NIN
BRSK1	PHF2
BRSK1	PTMS
BRSK1	RUNDC1
BRSK1	SHANK2
BRSK1	SRGAP2
BRSK1	SYNGAP1
BRSK1	TANC2
BRSK1	TLK2
BRSK1	UBR3
BRSK1	ZFHX3
BRSK2	CELF4
BRSK2	DST
BRSK2	FAM168B
BRSK2	GABRB3
BRSK2	GLTSCR2
BRSK2	IRF2BPL
BRSK2	KDM4B
BRSK2	L1CAM
BRSK2	LDB1
BRSK2	MED13
BRSK2	NBEA
BRSK2	STXBP1
BRSK2	SYNGAP1
BRSK2	TNRC18
BRSK2	UNC79
BRWD1	NOTCH1
BSDC1	DST
BSDC1	GRIA2
BSDC1	IGSF3
BSDC1	KIAA2018
BSDC1	L1CAM
BSDC1	LRRTM2
BSDC1	MIAT
BSDC1	MYT1L
BSDC1	SHANK2
BTAF1	RUNDC1
BTBD6	TLK2
BTBD9	CHD8
BTBD9	DIP2C
BTRC	CHD8
BTRC	FBXO18
BTRC	SYNGAP1
BTRC	THSD7A
BZRAP1	CBX4
BZRAP1	HECTD4
BZRAP1	L1CAM
BZRAP1	RFX7
BZRAP1	SCN2A
BZRAP1	SHANK2
BZRAP1	SPRY2
BZRAP1	TMEM132B
BZRAP1	TNRC18
C11orf30	CELF4
C18orf54	SHANK2
C18orf54	TNC
C20orf194	CC2D1A
C20orf194	CELF2
C20orf194	CELF4
C20orf194	GAREM
C20orf194	GRIA2
C20orf194	HECTD4
C20orf194	HIVEP3
C20orf194	IGSF3
C20orf194	KDM6B
C20orf194	L1CAM
C20orf194	MIAT
C20orf194	MYT1L
C20orf194	NBEA
C20orf194	PHF2
C20orf194	RNF38
C20orf194	SORBS1
C20orf194	SPTBN1
C20orf194	TANC2
C20orf194	TMEM132B
C20orf194	TNC
C20orf194	UNC79
C20orf194	WDFY3
C21orf2	MYT1L
CARKD	MYT1L
CBX4	INTS1
CBX4	PLEKHO1
CC2D1A	CECR2
CC2D1A	GRIA2
CC2D1A	L1CAM
CC2D1A	NBEA
CC2D1A	PMM2
CC2D1A	PTEN
CC2D1A	RUNDC3B
CC2D1A	SCN2A
CC2D1A	SYNGAP1
CC2D1A	TANC2
CC2D1A	THSD7A
CDC42BPB	NBEA
CDC42BPB	SHANK2
CDC42BPB	SPRY2
CDC42BPB	TAF4
CDC42BPB	TCF20
CDC42BPB	ZC3H4
CDC73	CHD8
CDC73	DST
CDC73	GABRB3
CDC73	GAREM
CDC73	IRF2BPL
CDC73	L1CAM
CDC73	MYT1L
CDC73	NBEA
CDC73	PLEKHO1
CDC73	SEMA6A
CDC73	SHANK2
CDC73	SPAST
CDC73	SPTBN1
CDC73	TANC2
CDC73	TNRC18
CECR2	DST
CECR2	FKBP15
CECR2	MIAT
CECR2	NBEA
CECR2	UNC79
CELF2	CELF4
CELF2	DGCR8
CELF2	DIP2C
CELF2	DST
CELF2	EP300
CELF2	GRIA2
CELF2	HECTD1
CELF2	HECTD4
CELF2	HERC1
CELF2	IGSF3
CELF2	KMT2A
CELF2	KMT2C
CELF2	L1CAM
CELF2	MED13
CELF2	MIAT
CELF2	NBEA
CELF2	SHANK2
CELF2	SPTBN1
CELF2	THSD7A
CELF2	TNRC18
CELF2	TPT1
CELF2	WHSC1
CELF4	CHD8
CELF4	CIC
CELF4	CORO2B
CELF4	CTCF
CELF4	DGKD
CELF4	DIP2C
CELF4	DST
CELF4	EDEM3
CELF4	ELAVL2
CELF4	EP300
CELF4	EP400
CELF4	FAM8A1
CELF4	FBXW11
CELF4	FOXO6
CELF4	FRYL
CELF4	GABRB3
CELF4	GRIA2
CELF4	HECTD4
CELF4	HERC1
CELF4	IGSF3
CELF4	JUP
CELF4	KAT6A
CELF4	KDM6B
CELF4	KIAA0100
CELF4	KIAA2022
CELF4	KLC1
CELF4	KMT2A
CELF4	KMT2C
CELF4	L1CAM
CELF4	MIAT
CELF4	MYO9B
CELF4	MYT1L
CELF4	NBEA
CELF4	NFIB
CELF4	NINL
CELF4	OSBPL8
CELF4	PCSK2
CELF4	PHF21A
CELF4	POLRMT
CELF4	RELN
CELF4	RUNDC1
CELF4	RUNDC3B
CELF4	SCN2A
CELF4	SIK3
CELF4	SPEN
CELF4	SPTBN1
CELF4	STXBP1
CELF4	SUV420H1
CELF4	SYNGAP1
CELF4	TANC2
CELF4	THSD7A
CELF4	TNRC18
CELF4	TPT1
CELF4	UBAP2
CELF4	UBN2
CELF4	WHSC1
CELF4	WNT7B
CELF4	ZNF490
CEP120	SKI
CHD2	EP300
CHD2	MIAT
CHD8	CORO2B
CHD8	DIP2C
CHD8	DST
CHD8	EDEM3
CHD8	GAREM
CHD8	GLTSCR2
CHD8	GPRIN1
CHD8	GRIA2
CHD8	HECTD1
CHD8	HERC1
CHD8	IGSF3
CHD8	IRF2BPL
CHD8	KMT2C
CHD8	KREMEN1
CHD8	L1CAM
CHD8	MIAT
CHD8	NINL
CHD8	PHF2
CHD8	PHF21A
CHD8	RALGAPB
CHD8	RANBP2
CHD8	RUNDC3B
CHD8	SHANK2
CHD8	SMARCC2
CHD8	SRRM2
CHD8	TCF20
CHD8	THSD7A
CHD8	TNRC18
CHD8	UBN2
CHD8	UBR5
CHD8	UNC79
CHD8	URB1
CHD8	ZC3H4
CHM	KDM6B
CHM	THSD7A
CIC	GRIA2
CIC	ITSN1
CIC	KDM5B
CIC	L1CAM
CKAP5	KIF11
CKAP5	TTK
CORO2B	DIP2C
CORO2B	DST
CORO2B	GABRB3
CORO2B	GLTSCR2
CORO2B	GRIA2
CORO2B	HECTD4
CORO2B	IGSF3
CORO2B	KDM6B
CORO2B	L1CAM
CORO2B	MIAT
CORO2B	PRPF8
CORO2B	STXBP1
CORO2B	THSD7A
CORO2B	ZC3H4
CRTC2	SHANK2
CSMD2	SKI
CSTF2T	MFSD3
CTCF	INTS1
CTCF	WDFY3
CUL3	FAM168B
CUL3	ZC3H4
CUX2	TNC
DDX3X	JARID2
DENND5A	DYRK1A
DENND5A	NBEA
DESI2	DUS1L
DESI2	GAREM
DESI2	GPRIN1
DGCR8	GIGYF1
DGCR8	KDM4B
DGCR8	L1CAM
DGCR8	RUNDC1
DGCR8	STARD9
DGKD	DIP2C
DGKD	HERC1
DGKD	NBEA
DGKD	SPEN
DGKD	WNT7B
DHX57	SDCCAG3
DIP2A	DST
DIP2A	L1CAM
DIP2A	PRR14L
DIP2C	DST
DIP2C	ELAVL2
DIP2C	ENTPD6
DIP2C	FBXW11
DIP2C	FOXO6
DIP2C	GABRB3
DIP2C	GAREM
DIP2C	GIGYF1
DIP2C	GRIA2
DIP2C	HERC1
DIP2C	IGSF3
DIP2C	KDM4B
DIP2C	KDM6B
DIP2C	KLC1
DIP2C	KMT2A
DIP2C	L1CAM
DIP2C	MGRN1
DIP2C	MIAT
DIP2C	NBEA
DIP2C	PHF12
DIP2C	PLEKHO1
DIP2C	RALGAPB
DIP2C	RELN
DIP2C	RUNDC3B
DIP2C	SCN2A
DIP2C	SEMA6A
DIP2C	SHANK2
DIP2C	ST3GAL6
DIP2C	STXBP1
DIP2C	SUV420H1
DIP2C	THSD7A
DIP2C	TNRC18
DIP2C	TPT1
DIP2C	TRIO
DIP2C	UNC79
DMWD	EP400
DMWD	MYO9B
DMWD	REXO1
DMWD	XKR6
DOT1L	EPHB2
DOT1L	KDM4B
DOT1L	L1CAM
DOT1L	MIAT
DOT1L	PLXNB1
DOT1L	SCN2A
DOT1L	UBN2
DPP4	NACC1
DSCAM	TMEM132B
DSCAM	TNC
DSCAM	TRIO
DST	ELAVL2
DST	EP300
DST	ERBB2IP
DST	FBXW11
DST	GABRB3
DST	GAREM
DST	GLTSCR2
DST	GRIA2
DST	HECTD4
DST	HERC1
DST	IRF2BPL
DST	ITSN1
DST	JUP
DST	KDM4B
DST	KMT2C
DST	L1CAM
DST	LRP6
DST	MIAT
DST	MYO9B
DST	NINL
DST	PCSK2
DST	PLEKHO1
DST	PRR14L
DST	RELN
DST	RIMS1
DST	RNF38
DST	RUNDC3B
DST	SEMA6A
DST	SHANK2
DST	SMARCC2
DST	SRRM2
DST	STRIP1
DST	SYNGAP1
DST	TANC2
DST	THSD7A
DST	TNRC18
DST	UNC79
DUS1L	EPHB2
DUS1L	GAREM
DUS1L	L1CAM
DUS1L	SKI
DVL3	KMT2A
DVL3	SRRM2
DVL3	TAF4
DVL3	TANC2
DYRK1A	EP300
DYRK1A	GAREM
DYRK1A	GIGYF1
DYRK1A	GLTSCR2
DYRK1A	HERC1
DYRK1A	IGSF3
DYRK1A	KMT2C
DYRK1A	L1CAM
DYRK1A	NFIB
DYRK1A	SEMA6A
DYRK1A	SKI
DYRK1A	WDFY3
EDEM3	GAREM
EDEM3	IRF2BPL
EDEM3	L1CAM
EDEM3	MYT1L
EDEM3	NEDD9
EDEM3	NF1
EDEM3	SCN2A
EDEM3	SEMA6A
EDEM3	SKI
EDEM3	UNC79
ELAVL2	HERC1
ELAVL2	KDM6B
ELAVL2	KLC1
ELAVL2	KMT2C
ELAVL2	L1CAM
ELAVL2	MIAT
ELAVL2	NBEA
ELAVL2	PLEKHO1
ELAVL2	POLRMT
ELAVL2	PSD3
ELAVL2	SCN2A
ELAVL2	STAM
ELAVL2	STXBP1
ELAVL2	WDFY3
ENTPD6	L1CAM
ENTPD6	PHF12
EP300	EP400
EP300	GABRB3
EP300	GAREM
EP300	GRIA2
EP300	HECTD4
EP300	IGSF3
EP300	KDM6B
EP300	KMT2C
EP300	L1CAM
EP300	MIAT
EP300	MYO9B
EP300	MYT1L
EP300	NF1
EP300	NFIB
EP300	OSBPL8
EP300	SCN2A
EP300	SEMA6A
EP300	SLIT2
EP300	SPTBN1
EP300	TCF20
EP300	TNRC18
EP300	ZNF292
EP400	KDM4B
EP400	NBEA
EP400	SPRED2
EP400	SUV420H1
EP400	SYNGAP1
EP400	TNRC18
EP400	WDFY3
EPHB2	GAREM
EPHB2	HERC1
ERBB2IP	KMT2C
ERBB2IP	MYO9B
ERBB2IP	MYT1L
ERBB2IP	NINL
ERBB2IP	PEX11B
ERBB2IP	SORBS1
ERLIN1	ZWILCH
FAM168B	RNF38
FAM168B	STXBP1
FAM169A	NF1
FAM169A	SETD5
FAM169A	SLC6A1
FAM8A1	GAREM
FAM8A1	GPRIN1
FAM8A1	IGSF3
FAM8A1	KDM4B
FAM8A1	KIAA0100
FAM8A1	KMT2C
FAM8A1	MYO9B
FAM8A1	MYT1L
FAM8A1	NF1
FAM8A1	PLXNA3
FAM8A1	PPP1R7
FAM8A1	SCN2A
FAM8A1	SHANK2
FAM8A1	SKI
FAM8A1	SPRED2
FAM8A1	SRGAP2
FAM8A1	SYNGAP1
FAM8A1	TCF20
FAM8A1	TNRC18
FAM8A1	UBN2
FAM8A1	UNC79
FAM91A1	REPIN1
FARP1	MYT1L
FARP1	PHF12
FARP1	SHANK2
FARP1	TRIM37
FBXO18	SPRY2
FBXO18	UBN2
FBXW11	GABRB3
FBXW11	KDM4B
FBXW11	NBEA
FBXW11	NIN
FBXW11	PHF12
FBXW11	RNF38
FBXW11	STXBP1
FBXW11	TNRC18
FBXW11	TRIO
FBXW5	GRIA2
FBXW5	L1CAM
FBXW5	PHF12
FBXW5	RFX7
FBXW5	SHANK2
FBXW5	THSD7A
FBXW5	TPT1
FGD4	NFIB
FGD4	RNF146
FGD4	SKI
FGD4	TCF12
FGD4	TMEM131
FOXO6	GLTSCR2
FOXO6	IRF2BPL
FOXO6	REPIN1
FOXO6	TCF3
FOXO6	THSD7A
FOXO6	TNRC18
FOXP1	PHF12
GABRB3	GAREM
GABRB3	GRIA2
GABRB3	HECTD4
GABRB3	IGSF3
GABRB3	JAKMIP1
GABRB3	KAT6A
GABRB3	L1CAM
GABRB3	MIAT
GABRB3	MTUS1
GABRB3	MYO9B
GABRB3	MYT1L
GABRB3	NBEA
GABRB3	NF1
GABRB3	NINL
GABRB3	PHF12
GABRB3	PLEKHO1
GABRB3	POGZ
GABRB3	PRR14L
GABRB3	RNF38
GABRB3	RUNDC1
GABRB3	RUNDC3B
GABRB3	SCNN1D
GABRB3	SEMA6A
GABRB3	SHANK2
GABRB3	SLC35A3
GABRB3	SPTBN1
GABRB3	STXBP1
GABRB3	TANC2
GABRB3	TNRC18
GABRB3	TPT1
GABRB3	UBR5
GABRB3	UNC79
GABRB3	WDFY3
GAREM	GRIA2
GAREM	HECTD4
GAREM	IGSF3
GAREM	IRF2BPL
GAREM	KDM4B
GAREM	KDM6B
GAREM	KLC1
GAREM	KLHDC10
GAREM	L1CAM
GAREM	MIAT
GAREM	MYT1L
GAREM	NBEA
GAREM	NIN
GAREM	PBX1
GAREM	PLXNA3
GAREM	POLR3A
GAREM	RNF213
GAREM	RUNDC3B
GAREM	SCN2A
GAREM	SEMA6A
GAREM	SHANK2
GAREM	SLC25A39
GAREM	SMAP2
GAREM	SPRY2
GAREM	SPTBN1
GAREM	STMN4
GAREM	STXBP1
GAREM	TANC2
GAREM	TMEM132B
GAREM	TNC
GAREM	TNRC18
GAREM	TNRC6B
GAREM	TWF2
GAREM	UNC79
GAREM	VCPIP1
GAREM	WDFY3
GAREM	XRN1
GIGYF1	GRIA2
GIGYF1	KDM6B
GIGYF1	L1CAM
GIGYF1	MYT1L
GIGYF1	NBEA
GIGYF1	UBAP2
GIGYF1	WDFY3
GIGYF2	PHF3
GIGYF2	THSD7A
GLTSCR2	IRF2BPL
GLTSCR2	KDM4B
GLTSCR2	L1CAM
GLTSCR2	NF1
GLTSCR2	REXO1
GLTSCR2	SRRM2
GLTSCR2	SYNGAP1
GLTSCR2	TNRC18
GLTSCR2	WDFY3
GPRIN1	KMT2C
GPRIN1	LRRTM2
GPRIN1	MECP2
GPRIN1	MYT1L
GPRIN1	NBEA
GPRIN1	PHF2
GPRIN1	PHF21A
GPRIN1	SHANK2
GPRIN1	UBR5
GPRIN1	UNC79
GPRIN1	URB1
GRIA2	HEATR5B
GRIA2	HECTD4
GRIA2	HERC1
GRIA2	HIVEP3
GRIA2	IGSF3
GRIA2	INADL
GRIA2	IQGAP2
GRIA2	IRF2BPL
GRIA2	JUP
GRIA2	KDM4B
GRIA2	KDM6B
GRIA2	KIAA0232
GRIA2	KLC1
GRIA2	KMT2A
GRIA2	KMT2C
GRIA2	L1CAM
GRIA2	LRRTM2
GRIA2	LTN1
GRIA2	MDN1
GRIA2	MECP2
GRIA2	MED13
GRIA2	MIAT
GRIA2	MYT1L
GRIA2	NBEA
GRIA2	NFIB
GRIA2	NIN
GRIA2	NLGN4X
GRIA2	PBX1
GRIA2	PLXNA3
GRIA2	PRR14L
GRIA2	PTEN
GRIA2	PTMS
GRIA2	RELN
GRIA2	RNF213
GRIA2	RUNDC3B
GRIA2	SCARA3
GRIA2	SCN2A
GRIA2	SEMA6A
GRIA2	SHANK2
GRIA2	SLC6A1
GRIA2	SORBS1
GRIA2	SPAST
GRIA2	SPEN
GRIA2	SPTBN1
GRIA2	SRGAP2
GRIA2	STMN4
GRIA2	STXBP1
GRIA2	TANC2
GRIA2	THSD7A
GRIA2	TMEM132B
GRIA2	TNC
GRIA2	TNRC18
GRIA2	TNRC6B
GRIA2	TRIM37
GRIA2	UBN2
GRIA2	UNC79
GRIA2	WDFY3
HEATR5B	KMT2C
HEATR5B	L1CAM
HEATR5B	SOX5
HEATR5B	SPRED2
HEATR5B	TMEM131
HECTD1	L1CAM
HECTD4	KMT2A
HECTD4	L1CAM
HECTD4	MIAT
HECTD4	NFIB
HECTD4	NINL
HECTD4	PHF21A
HECTD4	PLXNA3
HECTD4	PRKAR1B
HECTD4	PRR14L
HECTD4	RASSF7
HECTD4	SCN2A
HECTD4	SHANK2
HECTD4	SPRY2
HECTD4	STRIP1
HECTD4	THSD7A
HECTD4	TTC37
HECTD4	UNC79
HERC1	IQGAP2
HERC1	KMT2A
HERC1	KMT2C
HERC1	MAK
HERC1	NIN
HERC1	PHF12
HERC1	SCN2A
HERC1	SPEN
HERC1	SPTBN1
HERC1	STRIP1
HERC1	SUV420H1
HERC1	THSD7A
HERC1	TMEM131
HERC1	UNC79
HERC1	WDFY3
HIVEP3	INTS1
HIVEP3	KDM6B
HIVEP3	L1CAM
HIVEP3	MUC12
HIVEP3	NBEA
HIVEP3	RIMS1
HIVEP3	SIK3
HMGN2	ILF2
HMGN2	KIF11
HMGN2	RBMX
HMGN2	TTK
HMMR	KIF11
HMMR	SRGAP2D
HMMR	TTK
IGSF3	IRF2BPL
IGSF3	KDM6B
IGSF3	L1CAM
IGSF3	LRRFIP1
IGSF3	MIAT
IGSF3	MTMR12
IGSF3	MYT1L
IGSF3	NFIB
IGSF3	PHF2
IGSF3	PHF21A
IGSF3	PITPNA
IGSF3	PLXNA3
IGSF3	RCBTB1
IGSF3	RUNDC3B
IGSF3	SCN2A
IGSF3	SHANK2
IGSF3	SKI
IGSF3	STXBP1
IGSF3	SUV420H1
IGSF3	TANC2
IGSF3	TMEM132B
IGSF3	TNRC18
IGSF3	UBR3
IGSF3	UNC79
IGSF3	WDFY3
IGSF3	WHSC1
ILF2	KIF11
INTS1	IQGAP2
INTS1	JAKMIP1
INTS1	OXR1
INTS1	SCN2A
INTS1	SKI
INTS1	THSD7A
IQGAP2	NBEA
IQGAP2	NIN
IQGAP2	SEMA6A
IQGAP2	SETD2
IRF2BPL	L1CAM
IRF2BPL	MIAT
IRF2BPL	SH2B1
IRF2BPL	THSD7A
IRF2BPL	TMEM131
IRF2BPL	TNRC18
IRF2BPL	TRIP11
JAKMIP1	RIMS1
JAKMIP1	RPS6KA3
JARID2	ZNF292
JUP	L1CAM
JUP	RANBP2
JUP	SHANK2
JUP	SPTBN1
JUP	TANC2
JUP	TNC
KAT6A	MIAT
KAT6A	ZNF292
KCNQ2	KDM4B
KCNQ2	TAOK2
KDM1B	MIAT
KDM4B	KIAA0100
KDM4B	KMT2A
KDM4B	MYT1L
KDM4B	NBEA
KDM4B	PHF2
KDM4B	PLXNB1
KDM4B	RELN
KDM4B	SCN2A
KDM4B	SPRY2
KDM4B	SRGAP2
KDM4B	TPT1
KDM4B	UNC79
KDM6B	L1CAM
KDM6B	MIAT
KDM6B	MYT1L
KDM6B	PHF12
KDM6B	PLXNA3
KDM6B	SCN2A
KDM6B	SKI
KDM6B	SUV420H1
KDM6B	ZNF292
KIAA0100	KMT2A
KIAA0100	MED13
KIAA0100	MYO9B
KIAA0100	PLXNB1
KIAA0100	TPT1
KIAA0232	RASSF7
KIAA2022	RELN
KIF11	TTK
KLC1	L1CAM
KLC1	MIAT
KLC1	MYT1L
KLC1	NBEA
KLC1	NF1
KLC1	NFIB
KLC1	RNF38
KLC1	STXBP1
KLC1	THSD7A
KLHL7	STAM
KMT2A	KMT2C
KMT2A	L1CAM
KMT2A	MIAT
KMT2A	MYO9B
KMT2A	PRPF8
KMT2A	PRR14L
KMT2A	RUNDC1
KMT2A	SHANK2
KMT2A	THSD7A
KMT2A	TMEM131
KMT2A	TNRC18
KMT2A	UBN2
KMT2A	WHSC1
KMT2A	ZNF292
KMT2C	L1CAM
KMT2C	MYO9B
KMT2C	MYT1L
KMT2C	NBEA
KMT2C	NIN
KMT2C	OSBPL8
KMT2C	SCN2A
KMT2C	SEMA6A
KMT2C	SHANK2
KMT2C	SPEN
KMT2C	SYNGAP1
KMT2C	TMEM131
KMT2C	TNRC18
KMT2C	TNRC6B
KMT2C	UBN2
KMT2C	WHSC1
L1CAM	MDN1
L1CAM	MIAT
L1CAM	MYO9B
L1CAM	MYT1L
L1CAM	NBEA
L1CAM	NFIB
L1CAM	NIN
L1CAM	NINL
L1CAM	NLGN4X
L1CAM	PEX11B
L1CAM	PHF12
L1CAM	PHF2
L1CAM	PLEKHO1
L1CAM	PLXNA3
L1CAM	PRR14L
L1CAM	PTEN
L1CAM	RCBTB1
L1CAM	RELN
L1CAM	RIMS1
L1CAM	RNF213
L1CAM	RNF38
L1CAM	RUNDC1
L1CAM	RUNDC3B
L1CAM	SCN2A
L1CAM	SEMA6A
L1CAM	SHANK2
L1CAM	SKI
L1CAM	SPEN
L1CAM	SPRY2
L1CAM	SPTBN1
L1CAM	STMN4
L1CAM	STXBP1
L1CAM	SUV420H1
L1CAM	SYNGAP1
L1CAM	TANC2
L1CAM	TCF20
L1CAM	THSD7A
L1CAM	TLDC1
L1CAM	TNRC18
L1CAM	TPT1
L1CAM	UNC79
L1CAM	WDFY3
L1CAM	WHSC1
L1CAM	ZC3H11A
L1CAM	ZNF292
LRP6	RALGAPB
LRP6	TNRC6B
LRP6	WHSC1
LRRTM2	MYT1L
LRRTM2	PBX1
LRRTM2	SCN2A
LRRTM2	SHANK2
LRRTM2	TMEM132B
LRRTM2	TNC
LRRTM2	UNC79
LTN1	SHANK2
MAP3K14	SRCAP
MDN1	MIAT
MDN1	WDFY3
MECP2	MIAT
MECP2	MTUS1
MECP2	SHANK2
MED13	NBEA
MED13	SLC25A39
MED13	SPEN
MED13	SUV420H1
MED13	TANC2
MED13	TNRC18
MED13L	NBEA
MED13L	NEDD9
MEGF6	PLXNB1
MFSD3	TANC2
MGRN1	NBEA
MIAT	MYO9B
MIAT	MYT1L
MIAT	NBEA
MIAT	NFIB
MIAT	NINL
MIAT	PLXNA3
MIAT	PRR14L
MIAT	RELN
MIAT	RNF213
MIAT	RNF38
MIAT	RUNDC1
MIAT	RUNDC3B
MIAT	SCN2A
MIAT	SHANK2
MIAT	SORBS1
MIAT	SOX5
MIAT	SPEN
MIAT	SPRED2
MIAT	SPTBN1
MIAT	SRGAP2
MIAT	SRRM2
MIAT	STMN4
MIAT	STXBP1
MIAT	TANC2
MIAT	THSD7A
MIAT	TNRC18
MIAT	TRIM37
MIAT	UNC79
MIAT	ZNF292
MSL2	NBEA
MTMR12	PPP1R7
MTMR12	RNF38
MTMR12	SPRY2
MTMR12	TMEM132B
MTMR12	WDFY3
MYO9B	MYT1L
MYO9B	SHANK2
MYO9B	SRPK2
MYO9B	SRRM2
MYO9B	SYNGAP1
MYO9B	TANC2
MYO9B	TNRC18
MYT1L	NBEA
MYT1L	NF1
MYT1L	NIN
MYT1L	NINL
MYT1L	PBX1
MYT1L	PHF12
MYT1L	PHF2
MYT1L	PHF21A
MYT1L	PLXNA3
MYT1L	PLXNB1
MYT1L	RNF38
MYT1L	RUNDC3B
MYT1L	SCN2A
MYT1L	SHANK2
MYT1L	SPRY2
MYT1L	SPTBN1
MYT1L	SRGAP2
MYT1L	STMN4
MYT1L	STXBP1
MYT1L	TANC2
MYT1L	TMEM132B
MYT1L	TNRC18
MYT1L	UNC79
MYT1L	WHSC1
NAA15	PSD3
NAA15	ZNF598
NBEA	NFIB
NBEA	NIN
NBEA	PBX1
NBEA	PHF2
NBEA	PLXNA3
NBEA	POLR3A
NBEA	POLRMT
NBEA	RELN
NBEA	RUNDC1
NBEA	RUNDC3B
NBEA	SCN2A
NBEA	SEMA6A
NBEA	SETD2
NBEA	SHANK2
NBEA	SPTBN1
NBEA	SRRM2
NBEA	STXBP1
NBEA	SYNGAP1
NBEA	TANC2
NBEA	TAOK2
NBEA	THSD7A
NBEA	TMEM132B
NBEA	TNRC18
NBEA	TRIO
NBEA	UNC79
NBEA	WDFY3
NBEA	ZNF292
NEDD9	TNC
NEDD9	TNRC18
NF1	PHF2
NF1	SEMA6A
NF1	SIK3
NF1	SPEN
NF1	TNRC18
NFIB	PLXNA3
NFIB	STXBP1
NFIB	SYNGAP1
NFIB	THSD7A
NFIB	TNRC18
NFIB	ZNF292
NIN	RUNDC3B
NIN	SCN2A
NIN	SHANK2
NIN	SPRY2
NIN	STRIP1
NIN	TMEM131
NIN	TMEM132B
NIN	TNC
NIN	TNRC18
NIN	TNRC6B
NIN	UNC79
NINL	NLGN4X
NINL	PHF21A
NINL	RASSF7
NINL	SRGAP2
NINL	SRRM2
NINL	SUV420H1
NINL	TAOK2
OSBPL8	SLC35A3
OSBPL8	TNRC18
PBX1	RIMBP2
PBX1	TMEM132B
PHF12	RFX7
PHF12	RUNDC1
PHF12	SHANK2
PHF12	SUV420H1
PHF12	UNC79
PHF12	WDFY3
PHF2	PLXNB1
PHF2	RIMS1
PHF2	RUNDC3B
PHF2	SHANK2
PHF2	SPRY2
PHF2	TANC2
PHF2	TNRC18
PHF2	TPT1
PHF21A	PLXNB1
PHF21A	SHANK2
PHF21A	SPRY2
PHF21A	TNRC18
PHF3	SOX5
PHF3	TANC2
PLEKHO1	SRCAP
PLXNA3	SHANK2
PLXNA3	SKI
PLXNA3	SPTBN1
PLXNA3	SYNGAP1
PLXNA3	TANC2
PLXNA3	UNC79
PLXNA3	URB1
PLXNA3	WHSC1
PLXNB1	TANC2
POGZ	TCF20
POLR3A	SRRM2
PPP1R7	STMN4
PPP1R7	ZC3H18
PRKAR1B	SHANK2
PRPF8	TPT1
PRR14L	RELN
PRR14L	STXBP1
PTEN	SCN2A
PTEN	SHANK2
PTEN	UNC79
PTMS	TNRC18
RALGAPB	SHANK2
RANBP2	SHANK2
RBMX	TTK
RCBTB1	SIK3
RELN	TPT1
REPIN1	TAF4
RFX7	SHANK2
RFX7	TNRC18
RFX7	WDFY3
RIMBP2	RUNDC3B
RIMBP2	SCN2A
RIMBP2	TMEM132B
RIMBP2	TNC
RIMS1	RUNDC3B
RIMS1	TRIO
RNF213	TMEM132B
RNF213	TWF2
RNF38	RUNDC1
RNF38	SEMA6A
RNF38	SPTBN1
RNF38	SRGAP2
RNF38	SRRM2
RNF38	STXBP5
RNF38	SUV420H1
RNF38	WHSC1
RNF38	ZNF292
RPS6KA3	WDFY3
RUNDC1	SLC35A3
RUNDC1	SRRM2
RUNDC3B	SCN2A
RUNDC3B	SHANK2
RUNDC3B	TANC2
RUNDC3B	TNRC18
RUNDC3B	UNC79
RUNDC3B	WDFY3
SCN2A	SEMA6A
SCN2A	SHANK2
SCN2A	SKI
SCN2A	SORBS1
SCN2A	STMN4
SCN2A	STXBP1
SCN2A	TANC2
SCN2A	TMEM132B
SCN2A	UNC79
SCN2A	XPO4
SEMA6A	SPRY2
SEMA6A	SRRM2
SEMA6A	STMN4
SEMA6A	STXBP1
SEMA6A	TMEM132B
SEMA6A	TNC
SEMA6A	UNC79
SETD2	SUV420H1
SETD5	WDFY3
SH2B1	SPTBN1
SHANK2	SPRY2
SHANK2	SPTBN1
SHANK2	SRGAP2
SHANK2	STRIP1
SHANK2	TANC2
SHANK2	TAOK2
SHANK2	TMEM132B
SHANK2	TNRC18
SHANK2	UBR5
SHANK2	UNC79
SHANK2	WDFY3
SIK3	UBN2
SKI	SPEN
SKI	WNT7B
SKIDA1	WNT7B
SLC38A3	TMEM132B
SLC38A3	TNC
SLC6A1	TMEM132B
SLC6A1	TNC
SORBS1	SPEN
SORBS1	SUV420H1
SORBS1	TANC2
SORBS1	TMEM132B
SORBS1	TNC
SORBS1	TNRC18
SPAST	TNRC18
SPAST	UNC79
SPEN	SPRED2
SPEN	SRRM2
SPRY2	STAM
SPRY2	STXBP5
SPRY2	TANC2
SPRY2	TMEM132B
SPRY2	TNC
SPTBN1	STXBP1
SPTBN1	SUV420H1
SPTBN1	UNC79
SPTBN1	XRN1
SRGAP2	STRIP1
SRGAP2	TCF20
SRGAP2	TNRC18
SRGAP2	XRN1
SRGAP2D	TTK
SRPK2	TNC
STAM	TRIP11
STMN4	STXBP1
STMN4	TANC2
STMN4	TMEM132B
STMN4	TNRC18
STXBP1	UNC79
SUV420H1	TMEM132B
SYNGAP1	TANC2
SYNGAP1	THSD7A
SYNGAP1	TLDC1
SYNGAP1	UBN2
SYNGAP1	ZNF462
TANC2	THSD7A
TANC2	TMEM132B
TANC2	TNC
TANC2	TNRC18
TANC2	UNC79
TANC2	WDFY3
THSD7A	TLDC1
THSD7A	TPT1
THSD7A	WNT7B
TMEM131	TNRC18
TMEM131	ZMYND11
TMEM132B	TNC
TMEM132B	TNRC18
TMEM132B	TNRC6B
TNC	TNRC6B
TNC	UNC79
TNRC18	TRIO
TNRC18	UBR5
TNRC18	UNC79
TNRC18	WDFY3
TNRC18	WHSC1
TNRC18	ZNF292
UNC79	WDFY3
WDFY3	ZNF853

## Sheet: Supplemental Table S7D
Supplemental Table S7D. Co-expression network of epilepsy genes with dnMis mutations in interneurons.
Gene symbol	Gene symbol
ABAT	ANKRD24
ABAT	ATP1A3
ABAT	CACNA1A
ABAT	CACNA1C
ABAT	CACNA1E
ABAT	CARS2
ABAT	CSMD2
ABAT	FASN
ABAT	GABBR2
ABAT	GABRB1
ABAT	GABRB3
ABAT	GRIN1
ABAT	KMT2B
ABAT	MAPK8IP1
ABAT	OBSL1
ABAT	RALGPS1
ABAT	SMARCA2
ABAT	TMEM132A
ABR	EEF1A2
ABR	FAM134A
ABR	FASN
ABR	FRMD4A
ABR	MAPK8IP1
ABR	SCN2A
ACTB	TUBA1A
AGPAT3	ANKRD24
AGPAT3	ATXN2L
AGPAT3	CACNA1A
AGPAT3	CSMD2
AGPAT3	EEF1A2
AGPAT3	FAM134A
AGPAT3	FASN
AGPAT3	GABBR2
AGPAT3	GABRB3
AGPAT3	GRIN1
AGPAT3	IQSEC2
AGPAT3	MAPK8IP1
AGPAT3	MEF2C
AGPAT3	PACS1
AGPAT3	PKD1
AGPAT3	PLXNA1
AGPAT3	RALGPS1
AGPAT3	SLIT1
AGPAT3	STK36
AGPAT3	YWHAG
AKAP6	FASN
ANK3	GRIN1
ANK3	KMT2B
ANK3	MEF2C
ANKRD24	ARSA
ANKRD24	CACNA1A
ANKRD24	CREBBP
ANKRD24	CSMD2
ANKRD24	FASN
ANKRD24	GABBR2
ANKRD24	GABRB1
ANKRD24	GABRB3
ANKRD24	GRIN1
ANKRD24	IQSEC2
ANKRD24	KCNT1
ANKRD24	KMT2B
ANKRD24	MAPK8IP1
ANKRD24	MEF2C
ANKRD24	OSBPL7
ANKRD24	PLXNA1
ANKRD24	PLXNB2
ANKRD24	RHOBTB2
ANKRD24	SCN2A
ANKRD24	SLIT1
ANKRD24	STK36
ANKRD24	TRIO
ARSA	ATXN2L
ARSA	CACNA1A
ARSA	CSMD2
ARSA	FAM134A
ARSA	FASN
ARSA	GABBR2
ARSA	GRIN1
ARSA	MAN2A2
ARSA	PAPD5
ARSA	PKD1
ARSA	RALGPS1
ARSA	SLC8A1
ARSA	SLIT1
ASXL1	CSMD2
ASXL1	FASN
ASXL1	MEF2C
ASXL1	PKD1
ASXL1	RALGPS1
ATP1A3	GABBR2
ATP1A3	GRIN1
ATP1A3	MEF2C
ATP1A3	RALGPS1
ATP1A3	SCN2A
ATP1A3	SLIT1
ATP1A3	YWHAG
ATXN2L	CACNA1A
ATXN2L	EEF1A2
ATXN2L	FASN
ATXN2L	GABBR2
ATXN2L	MAPK8IP1
ATXN2L	PACS1
BASP1	CACNA1A
BASP1	DNM1
BASP1	EEF1A2
BASP1	FASN
BASP1	GABRB3
BASP1	MEF2C
BASP1	SCN2A
BASP1	SLIT1
BASP1	SMARCA2
BASP1	TRIO
BASP1	YWHAG
BCR	KCNQ3
BCR	KIAA1456
BCR	MAPK8IP1
C1QTNF6	NCOR2
CACNA1A	CACNA1E
CACNA1A	CAP2
CACNA1A	CARS2
CACNA1A	CSMD2
CACNA1A	DNM1
CACNA1A	EEF1A2
CACNA1A	FAM134A
CACNA1A	FASN
CACNA1A	GABBR2
CACNA1A	GABRB1
CACNA1A	GABRB3
CACNA1A	GNAO1
CACNA1A	GRIN1
CACNA1A	IQSEC2
CACNA1A	KMT2B
CACNA1A	LETM1
CACNA1A	MAPK8IP1
CACNA1A	MAST1
CACNA1A	MEF2C
CACNA1A	NLGN2
CACNA1A	OSBPL7
CACNA1A	PACS1
CACNA1A	PACS2
CACNA1A	PAPD5
CACNA1A	PKD1
CACNA1A	PLXNA1
CACNA1A	RALGAPA1
CACNA1A	RALGPS1
CACNA1A	RANGAP1
CACNA1A	SCN2A
CACNA1A	SLC1A2
CACNA1A	SLC8A1
CACNA1A	SLIT1
CACNA1A	SMARCA2
CACNA1A	STK36
CACNA1A	TMEM132A
CACNA1A	TRIO
CACNA1C	CSMD2
CACNA1C	DNM1
CACNA1C	GRIN1
CACNA1C	PKD1
CACNA1E	CARS2
CACNA1E	CSMD2
CACNA1E	EEF1A2
CACNA1E	FASN
CACNA1E	FGF12
CACNA1E	GABBR2
CACNA1E	GABRB1
CACNA1E	GABRB3
CACNA1E	GRIN1
CACNA1E	KCNQ3
CACNA1E	MAN2A2
CACNA1E	NFASC
CACNA1E	PACS1
CACNA1E	PAPD5
CACNA1E	PKD1
CACNA1E	PLXNA1
CACNA1E	RALGPS1
CACNA1E	RANGAP1
CACNA1E	SCN2A
CACNA1E	SLIT1
CACNA1E	TRIO
CAP2	GABBR2
CAP2	PLXNA1
CARS2	FASN
CARS2	GABBR2
CARS2	GABRB3
CARS2	GRIN1
CARS2	MAN2A2
CARS2	OSBPL7
CARS2	SCN2A
CARS2	TRAF3IP1
CDC25B	IQSEC2
CLCN4	FASN
CLCN4	GABBR2
CLCN4	YWHAG
CPNE8	PTPRO
CREBBP	FAM134A
CREBBP	SCN2A
CSMD2	DNM1
CSMD2	EEF1A2
CSMD2	FAM134A
CSMD2	FASN
CSMD2	FRMD4A
CSMD2	FZR1
CSMD2	GABBR2
CSMD2	GABRB1
CSMD2	GRIN1
CSMD2	IQSEC2
CSMD2	KCNT1
CSMD2	MAN2A2
CSMD2	MAST1
CSMD2	MEF2C
CSMD2	NFASC
CSMD2	OBSL1
CSMD2	OSBPL7
CSMD2	PACS1
CSMD2	PACS2
CSMD2	PAPD5
CSMD2	PHLDB1
CSMD2	PKD1
CSMD2	PLXNA1
CSMD2	RALGPS1
CSMD2	RANGAP1
CSMD2	RNF213
CSMD2	SCN2A
CSMD2	SLC1A2
CSMD2	SLC8A1
CSMD2	SLIT1
CSMD2	SMARCA2
CSMD2	SPG7
CSMD2	STK36
CSMD2	TRIO
CUX2	FASN
DIP2C	KIAA1456
DIP2C	RALGPS1
DNM1	DPP7
DNM1	EEF1A2
DNM1	FAM134A
DNM1	FASN
DNM1	GABBR2
DNM1	GABRB3
DNM1	GNAO1
DNM1	GRIN1
DNM1	KCNQ3
DNM1	KCNT1
DNM1	KIAA1456
DNM1	MAPK8IP1
DNM1	MAST1
DNM1	NCOR2
DNM1	OBSL1
DNM1	PACS1
DNM1	PACS2
DNM1	PHLDB1
DNM1	PLXNA1
DNM1	SCN2A
DNM1	SLIT1
DNM1	SMARCA2
DNM1	SPG7
DNM1	TRIO
DPP7	FASN
DPP7	GABBR2
DPP7	GRIN1
DPP7	KMT2B
DPP7	MAN2A2
DPP7	NFASC
DPP7	OSBPL7
DPP7	RALGPS1
DPP7	RANGAP1
DPP7	SCN2A
DPP7	STARD7
EEF1A2	FAM134A
EEF1A2	FASN
EEF1A2	FGF12
EEF1A2	GABBR2
EEF1A2	GABRB1
EEF1A2	GABRB3
EEF1A2	GNAO1
EEF1A2	GRIN1
EEF1A2	IQSEC2
EEF1A2	KCNQ3
EEF1A2	KMT2B
EEF1A2	MAPK8IP1
EEF1A2	MEF2C
EEF1A2	OSBPL7
EEF1A2	PACS1
EEF1A2	PACS2
EEF1A2	PAPD5
EEF1A2	PKD1
EEF1A2	PLXNA1
EEF1A2	RALGPS1
EEF1A2	RANGAP1
EEF1A2	RFX3
EEF1A2	SCN2A
EEF1A2	SLIT1
EEF1A2	SMARCA2
EEF1A2	STARD7
EEF1A2	STK36
EEF1A2	TRIO
EEF1A2	YWHAG
FAM134A	FASN
FAM134A	GABBR2
FAM134A	GNAO1
FAM134A	GRIN1
FAM134A	KIAA1456
FAM134A	KMT2B
FAM134A	MAPK8IP1
FAM134A	MEF2C
FAM134A	NFASC
FAM134A	PACS1
FAM134A	PLXNA1
FAM134A	PTPRT
FAM134A	RALGPS1
FAM134A	RANGAP1
FAM134A	SCN2A
FAM134A	SLC8A1
FAM134A	SLIT1
FAM134A	SMARCA2
FAM227A	OSBPL7
FASN	FGF12
FASN	GABBR2
FASN	GABRB1
FASN	GABRB3
FASN	GNAO1
FASN	GRIN1
FASN	KCNQ3
FASN	KIAA1456
FASN	KMT2B
FASN	LETM1
FASN	MAPK8IP1
FASN	MAST1
FASN	MEF2C
FASN	NFASC
FASN	NLGN2
FASN	OBSL1
FASN	PACS1
FASN	PACS2
FASN	PAPD5
FASN	PKD1
FASN	PLXNA1
FASN	PTPRO
FASN	RALGAPA1
FASN	RALGPS1
FASN	RANGAP1
FASN	SCN2A
FASN	SLC1A2
FASN	SLIT1
FASN	SMARCA2
FASN	STARD7
FASN	TRIO
FASN	YWHAG
FGF12	GABBR2
FGF12	GRIN1
FGF12	KMT2B
FGF12	SCN2A
FGF12	SLIT1
FRMD4A	GABBR2
FRMD4A	GRIN1
FRMD4A	NFASC
FRMD4A	SMARCA2
GABBR2	GABRB1
GABBR2	GABRB3
GABBR2	GNAO1
GABBR2	GRIN1
GABBR2	KCNQ3
GABBR2	MAN2A2
GABBR2	MAPK8IP1
GABBR2	MAPT
GABBR2	MAST1
GABBR2	MEF2C
GABBR2	NFASC
GABBR2	OBSL1
GABBR2	OSBPL5
GABBR2	OSBPL7
GABBR2	PACS1
GABBR2	PACS2
GABBR2	PAPD5
GABBR2	PKD1
GABBR2	PLXNA1
GABBR2	PRNP
GABBR2	RALGAPA1
GABBR2	RALGPS1
GABBR2	RANGAP1
GABBR2	RFX3
GABBR2	SCN2A
GABBR2	SLC8A1
GABBR2	SLIT1
GABBR2	SMARCA2
GABBR2	STARD7
GABBR2	TRIO
GABBR2	YWHAG
GABRB1	GABRB3
GABRB1	GRIN1
GABRB1	MAN1A2
GABRB1	MAPK8IP1
GABRB1	MEF2C
GABRB1	MTOR
GABRB1	NFASC
GABRB1	RALGPS1
GABRB1	SCN2A
GABRB1	SLC8A1
GABRB1	SLIT1
GABRB1	SMARCA2
GABRB1	STK36
GABRB1	TRIO
GABRB1	YWHAG
GABRB3	GRIN1
GABRB3	LETM1
GABRB3	MAPK8IP1
GABRB3	MEF2C
GABRB3	NFASC
GABRB3	OBSL1
GABRB3	PACS2
GABRB3	PLXNA1
GABRB3	RALGAPA1
GABRB3	RANGAP1
GABRB3	SCN2A
GABRB3	SLIT1
GABRB3	SMARCA2
GNAO1	MAPK8IP1
GNAO1	MEF2C
GNAO1	PACS1
GNAO1	PLXNA1
GNAO1	RALGPS1
GNAO1	RANGAP1
GNAO1	SCN2A
GNAO1	SLIT1
GNAO1	SMARCA2
GNAO1	TRIO
GNAO1	YWHAG
GPHN	SCN2A
GRIN1	IQSEC2
GRIN1	KCNQ3
GRIN1	KCNT1
GRIN1	KMT2B
GRIN1	LETM1
GRIN1	MAN1A2
GRIN1	MAN2A2
GRIN1	MAPK8IP1
GRIN1	MAST1
GRIN1	MEF2C
GRIN1	NCOR2
GRIN1	NFASC
GRIN1	NLGN2
GRIN1	PACS1
GRIN1	PACS2
GRIN1	PAPD5
GRIN1	PHLDB1
GRIN1	PKD1
GRIN1	PLXNA1
GRIN1	RALGAPA1
GRIN1	RALGPS1
GRIN1	RANGAP1
GRIN1	RFX3
GRIN1	RNF213
GRIN1	SCN2A
GRIN1	SLC8A1
GRIN1	SLIT1
GRIN1	SMARCA2
GRIN1	SPG7
GRIN1	STK36
GRIN1	TRIO
GRIN1	YWHAG
IQSEC2	KCNT1
IQSEC2	RALGPS1
IQSEC2	RANGAP1
IQSEC2	SLC1A2
IQSEC2	TRIO
KCNQ3	MAPK8IP1
KCNQ3	NFASC
KCNQ3	PACS1
KCNQ3	PKD1
KCNQ3	RALGPS1
KCNQ3	RANGAP1
KCNQ3	SLIT1
KCNQ3	TRIO
KCNT1	OBSL1
KCNT1	SCN2A
KIAA1456	NCOR2
KIAA1456	PKD1
KIAA1456	STARD7
KIAA1456	TRAF3IP1
KMT2B	MAPK8IP1
KMT2B	NLGN2
KMT2B	OSBPL7
KMT2B	PACS1
KMT2B	PKD1
KMT2B	RALGAPA1
KMT2B	RALGPS1
KMT2B	RANGAP1
KMT2B	SCN2A
KMT2B	SLIT1
KMT2D	OSBPL7
LETM1	SCN2A
LETM1	SLIT1
MAN1A2	NFASC
MAN1A2	PLXNA1
MAN1A2	RANGAP1
MAN2A2	MAST1
MAN2A2	RALGPS1
MAPK8IP1	MEF2C
MAPK8IP1	NLGN2
MAPK8IP1	PACS1
MAPK8IP1	PACS2
MAPK8IP1	PAPD5
MAPK8IP1	PTPRO
MAPK8IP1	RANGAP1
MAPK8IP1	SCN2A
MAPK8IP1	SLIT1
MAPK8IP1	SMARCA2
MAPK8IP1	TRIO
MAPK8IP1	YWHAG
MAPT	MEF2C
MAPT	SCN2A
MAST1	PACS1
MAST1	PACS2
MAST1	PHLDB1
MAST1	PKD1
MAST1	YWHAG
MEF2C	PACS1
MEF2C	PACS2
MEF2C	PKD1
MEF2C	PRNP
MEF2C	PTPRT
MEF2C	RALGPS1
MEF2C	SCN2A
MEF2C	SLIT1
MEF2C	SMARCA2
MEF2C	TRIO
MEF2C	YWHAG
NCOR2	PLXNA1
NCOR2	RALGAPA1
NCOR2	TRAF3IP1
NFASC	NLGN2
NFASC	PKD1
NFASC	PLCG1
NFASC	PLXNA1
NFASC	PTPRO
NFASC	RALGPS1
NFASC	RANGAP1
NFASC	SLC8A1
NFASC	SLIT1
NFASC	TRIO
NFASC	WDR19
NFE2L1	SMARCA2
NLGN2	PAPD5
NLGN2	PKD1
NLGN2	TRIO
OBSL1	OSBPL7
OBSL1	SCN2A
OSBPL5	RANGAP1
OSBPL5	SCN2A
OSBPL7	PHLDB1
OSBPL7	RALGPS1
OSBPL7	TRAF3IP1
PACS1	PACS2
PACS1	PAPD5
PACS1	PKD1
PACS1	RALGPS1
PACS1	RANGAP1
PACS1	RFX3
PACS1	SCN2A
PACS1	SLC8A1
PACS1	TRIO
PACS1	YWHAG
PACS2	PKD1
PACS2	RALGPS1
PACS2	RANGAP1
PACS2	SCN2A
PAPD5	RANGAP1
PAPD5	SLIT1
PAPD5	TRIO
PHLDB1	SPG7
PKD1	PLCG1
PKD1	PLXNB2
PKD1	RALGPS1
PKD1	SCN2A
PKD1	SLC8A1
PKD1	SLIT1
PKD1	SPG7
PKD1	STK36
PKD1	TRIO
PLXNA1	RALGPS1
PLXNA1	SCN2A
PLXNA1	SLIT1
PLXNA1	TRIO
RALGAPA1	TRIO
RALGPS1	RANGAP1
RALGPS1	SLIT1
RALGPS1	SMARCA2
RALGPS1	TRIO
RALGPS1	YWHAG
RANGAP1	SCN2A
RANGAP1	SMARCA2
RANGAP1	TRIO
RFX3	TRIO
SCN2A	SLC8A1
SCN2A	SLIT1
SCN2A	SMARCA2
SCN2A	TRIO
SCN2A	YWHAG
SLC1A2	SLC8A1
SLC1A2	TRIO
SLC8A1	SLIT1
SLIT1	SMARCA2
SLIT1	YWHAG
SMARCA2	TMEM132A
SMARCA2	YWHAG
TUBA1A	TUBB2A

## Sheet: Supplemental Table S7E
Supplemental Table S7E. Co-expression degree in the NPC network of ASD genes with dnLoF mutations.
Column "dnLoF-ASD": 3+=at least three dnLoF mutations, 2=two dnLoF mutations, and 1=only one dnLoF mutation.
Gene symbol	Degree	dnLoF-ASD
L1CAM	91	1
GRIA2	79	1
CELF4	68	1
MIAT	63	1
NBEA	63	1
SHANK2	58	2
TNRC18	57	1
GAREM	56	1
MYT1L	55	2
ANK2	50	3+
DST	50	1
IGSF3	45	1
DIP2C	44	2
GABRB3	44	1
CHD8	41	3+
SCN2A	41	3+
TANC2	40	1
UNC79	40	1
AHDC1	33	1
KMT2C	32	3+
THSD7A	30	1
TMEM132B	30	1
WDFY3	30	3+
EP300	28	1
KDM4B	28	1
CELF2	27	1
HECTD4	27	3+
HERC1	27	1
KMT2A	27	3+
RUNDC3B	26	1
C20orf194	24	1
FAM8A1	24	1
SEMA6A	24	1
SPTBN1	24	1
STXBP1	24	1
KDM6B	23	3+
NIN	23	1
TNC	23	1
AMOTL1	22	1
BRSK1	22	1
NFIB	22	1
SYNGAP1	22	3+
PLXNA3	21	1
SPRY2	21	1
MYO9B	20	1
RNF38	20	1
ASXL3	19	3+
PHF2	19	2
CDC73	18	1
ELAVL2	18	1
IRF2BPL	18	1
NINL	18	1
PHF12	17	1
BRSK2	16	1
CORO2B	16	1
SKI	16	1
SUV420H1	16	3+
ARID1B	15	3+
GLTSCR2	15	1
GPRIN1	15	1
FBXW11	14	1
KLC1	14	1
RUNDC1	14	1
SRGAP2	14	1
CC2D1A	13	1
DYRK1A	13	2
NF1	13	1
SORBS1	13	1
SPEN	13	2
SRRM2	13	1
STMN4	13	1
TPT1	13	1
EDEM3	12	1
ZNF292	12	1
ADNP	11	3+
BZRAP1	11	1
EP400	11	1
MED13	11	3+
PHF21A	11	1
RELN	11	1
WHSC1	11	1
ANKRD11	10	3+
FOXO6	10	1
GIGYF1	10	3+
HIVEP3	10	3+
INTS1	10	1
IQGAP2	10	1
JUP	10	1
KIAA0100	10	1
LRRTM2	10	1
PRR14L	10	1
TMEM131	10	1
UBN2	10	2
ARHGAP5	9	1
BIRC6	9	1
BSDC1	9	1
AP4E1	8	1
BCL11A	8	2
MTMR12	8	1
PBX1	8	1
PLEKHO1	8	1
PLXNB1	8	1
PTEN	8	2
RIMS1	8	2
TNRC6B	8	2
AKAP9	7	1
DOT1L	7	1
ERBB2IP	7	1
FBXW5	7	1
HEATR5B	7	1
RNF213	7	1
STRIP1	7	1
TCF20	7	1
CDC42BPB	6	1
CECR2	6	1
DGCR8	6	1
DGKD	6	1
RFX7	6	1
RIMBP2	6	1
TRIO	6	1
TTK	6	1
UBR5	6	1
WNT7B	6	1
BTRC	5	1
CIC	5	1
DMWD	5	1
DUS1L	5	1
DVL3	5	1
FGD4	5	1
KIF11	5	1
MDN1	5	1
MECP2	5	3+
OSBPL8	5	1
SETD2	5	1
SIK3	5	1
SPAST	5	3+
SPRED2	5	1
XRN1	5	1
EPHB2	4	1
FAM168B	4	1
FARP1	4	1
HMGN2	4	1
JAKMIP1	4	1
KAT6A	4	1
LRP6	4	1
NEDD9	4	1
PPP1R7	4	1
RALGAPB	4	1
REPIN1	4	1
SLC6A1	4	2
STAM	4	1
TAF4	4	1
TAOK2	4	2
ZC3H4	4	1
ANP32A	3	1
ATP13A3	3	1
CBX4	3	1
CTCF	3	1
DESI2	3	1
DIP2A	3	2
DSCAM	3	2
ENTPD6	3	1
FAM169A	3	1
FBXO18	3	1
HECTD1	3	1
HMMR	3	1
JARID2	3	1
KIAA0232	3	1
KIAA2022	3	1
MGRN1	3	1
NLGN4X	3	1
PHF3	3	3+
POLR3A	3	1
POLRMT	3	1
PRKAR1B	3	1
PRPF8	3	1
PTMS	3	1
RANBP2	3	1
RASSF7	3	1
RCBTB1	3	1
SLC35A3	3	1
SOX5	3	1
TLDC1	3	1
TRIM37	3	1
URB1	3	1
AP1G2	2	1
BTBD6	2	1
BTBD9	2	1
C18orf54	2	1
CHD2	2	1
CHM	2	1
CKAP5	2	1
CUL3	2	2
DENND5A	2	1
GIGYF2	2	1
ILF2	2	1
INADL	2	1
ITSN1	2	1
KCNQ2	2	2
LTN1	2	1
MED13L	2	1
MFSD3	2	1
MTUS1	2	1
NAA15	2	2
PCSK2	2	1
PEX11B	2	1
POGZ	2	3+
PSD3	2	1
RBMX	2	1
REXO1	2	1
RPS6KA3	2	1
SCNN1D	2	1
SETD5	2	1
SH2B1	2	1
SLC25A39	2	1
SLC38A3	2	1
SMARCC2	2	2
SRCAP	2	1
SRGAP2D	2	1
SRPK2	2	1
STXBP5	2	1
TCF3	2	1
TLK2	2	1
TRIP11	2	2
TWF2	2	1
UBAP2	2	1
UBR3	2	1
XPO4	2	1
ZC3H11A	2	1
ADAMTS9	1	1
ADSS	1	1
APH1A	1	1
ARHGAP44	1	1
ASH1L	1	3+
ATP1A1	1	1
BAZ2B	1	1
BCLAF1	1	1
BRWD1	1	1
BTAF1	1	1
C11orf30	1	1
C21orf2	1	1
CARKD	1	1
CASP8AP2	1	1
CEP120	1	1
CPD	1	1
CRTC2	1	1
CSMD2	1	1
CSTF2T	1	1
CTBP2	1	1
CUX2	1	1
DDX3X	1	2
DHX57	1	2
DPP4	1	1
ERLIN1	1	1
EZR	1	1
FAM177A1	1	1
FAM91A1	1	1
FKBP15	1	1
FOXP1	1	2
FRYL	1	1
KDM1B	1	1
KDM3A	1	1
KDM5B	1	3+
KIAA2018	1	1
KIF21A	1	1
KLHDC10	1	1
KLHL7	1	1
KREMEN1	1	1
LDB1	1	1
LRRFIP1	1	1
MAK	1	1
MAP3K14	1	1
MEGF6	1	1
MSL2	1	1
MUC12	1	1
NACC1	1	1
NOTCH1	1	1
OXR1	1	1
PITPNA	1	1
PMM2	1	1
RNF146	1	1
SCARA3	1	1
SDCCAG3	1	1
SKIDA1	1	1
SLIT2	1	1
SMAP2	1	1
ST3GAL6	1	1
STARD9	1	1
TCF12	1	1
TTC37	1	1
VCPIP1	1	1
XKR6	1	1
ZC3H18	1	1
ZFHX3	1	1
ZMYND11	1	1
ZNF462	1	1
ZNF490	1	1
ZNF598	1	1
ZNF853	1	1
ZWILCH	1	1

## Sheet: Supplemental Table S7F
Supplemental Table S7F. Co-expression degree in the interneuron network of epilepsy genes with dnMis mutations.
Column "dnMis-Epi": 2+=at least two dnMis mutations, and 1=only one dnMis mutation.
Gene symbol	Degree	dnMis-Epi
GRIN1	53	2+
FASN	51	2+
GABBR2	50	2+
CACNA1A	43	2+
CSMD2	42	1
SCN2A	39	2+
EEF1A2	37	2+
RALGPS1	33	1
SLIT1	32	1
MAPK8IP1	30	1
MEF2C	29	1
PKD1	29	1
DNM1	28	2+
TRIO	28	1
PACS1	27	1
FAM134A	26	1
GABRB3	25	2+
RANGAP1	25	2+
ANKRD24	24	1
CACNA1E	23	1
GABRB1	23	1
NFASC	23	1
SMARCA2	23	1
PLXNA1	21	1
AGPAT3	20	1
KMT2B	20	2+
ABAT	18	1
YWHAG	18	1
GNAO1	17	2+
PACS2	16	1
KCNQ3	15	1
ARSA	14	1
OSBPL7	14	1
PAPD5	14	1
SLC8A1	13	1
DPP7	12	1
IQSEC2	12	1
MAST1	12	1
BASP1	11	1
CARS2	11	1
KIAA1456	9	1
MAN2A2	9	1
NLGN2	9	1
OBSL1	9	1
ATP1A3	8	1
ATXN2L	8	1
FGF12	8	1
RALGAPA1	8	1
STK36	8	1
KCNT1	7	2+
NCOR2	7	1
ABR	6	1
FRMD4A	6	1
LETM1	6	1
PHLDB1	6	1
SLC1A2	6	1
ASXL1	5	1
CACNA1C	5	1
MAN1A2	5	1
RFX3	5	1
SPG7	5	1
STARD7	5	1
PTPRO	4	1
TRAF3IP1	4	1
ANK3	3	1
BCR	3	1
CAP2	3	1
CLCN4	3	1
CREBBP	3	1
MAPT	3	1
OSBPL5	3	1
TMEM132A	3	1
DIP2C	2	1
PLCG1	2	1
PLXNB2	2	1
PRNP	2	1
PTPRT	2	1
RNF213	2	1
TUBA1A	2	1
ACTB	1	1
AKAP6	1	1
C1QTNF6	1	1
CDC25B	1	1
CPNE8	1	1
CUX2	1	1
FAM227A	1	1
FZR1	1	1
GPHN	1	1
KMT2D	1	1
MTOR	1	1
NFE2L1	1	1
RHOBTB2	1	1
TUBB2A	1	1
WDR19	1	1
